# Supplementary material for: Increased genetic contribution to wellbeing during the COVID-19 pandemic
Source: PubMed Central journal article supplement (PMC9119461; doi:10.1371/journal.pgen.1010135), 2022-05-19

Being able to comply with the measure to wash hands for 20 minutes

PGS: BMI

Meta analysis Z-score: 5.52, p-value: 3.41E-08

Global Screening Array  
Z-score: 4.00, p-value: 6.27E-05

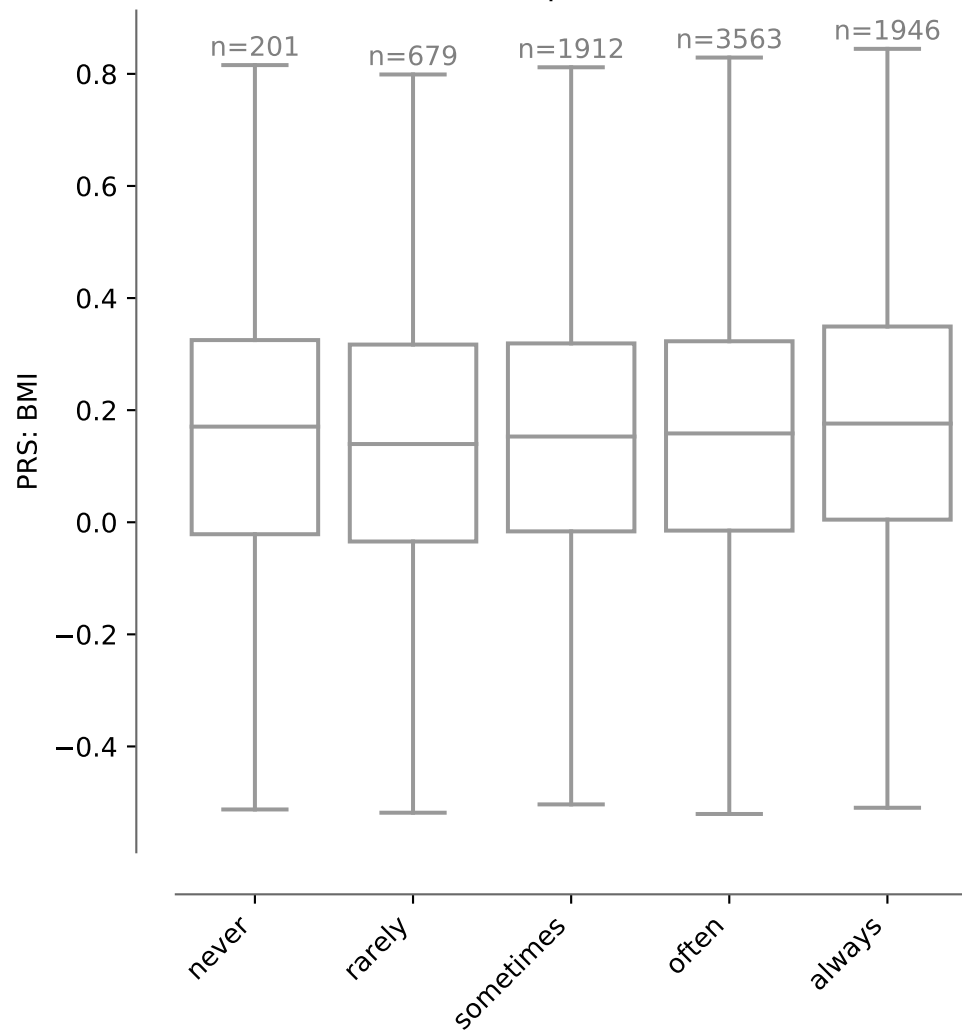

Being able to comply with the measure to wash hands for 20 minutes

HumanCytoSNP-12  
Z-score: 3.96, p-value: 7.38E-05

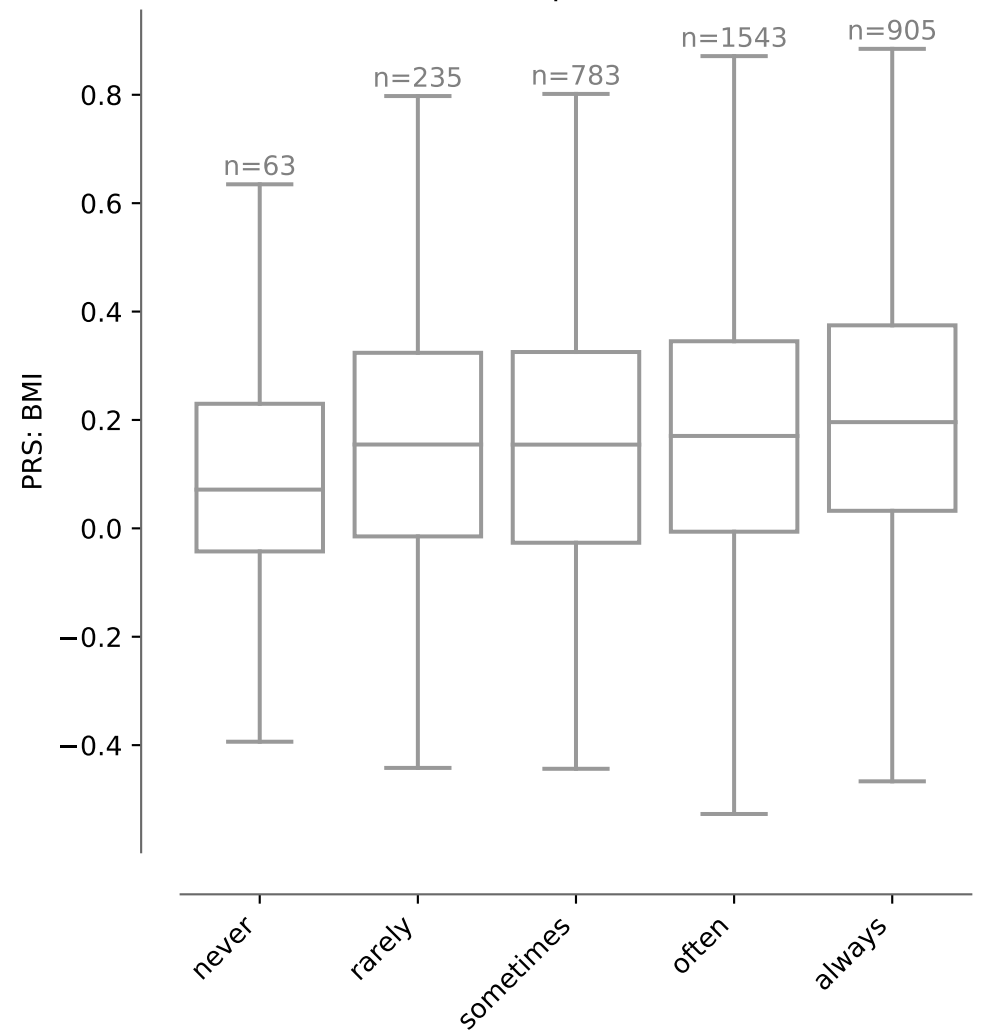

Being able to comply with the measure to wash hands for 20 minutes

Being able to comply with the measure to wash hands for 20 minutes

PGS: Educational attainment

Meta analysis Z-score: -7.33, p-value: 2.36E-13

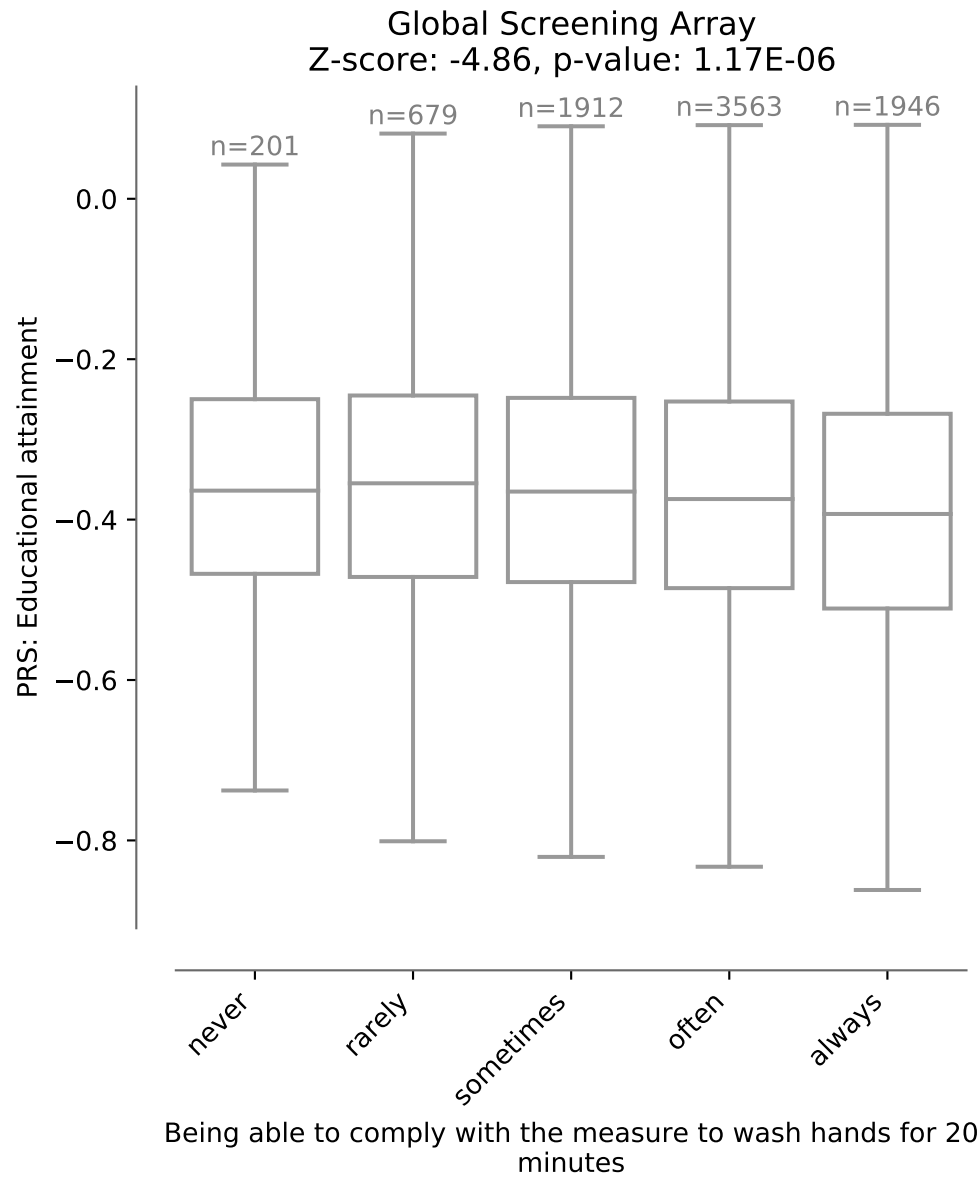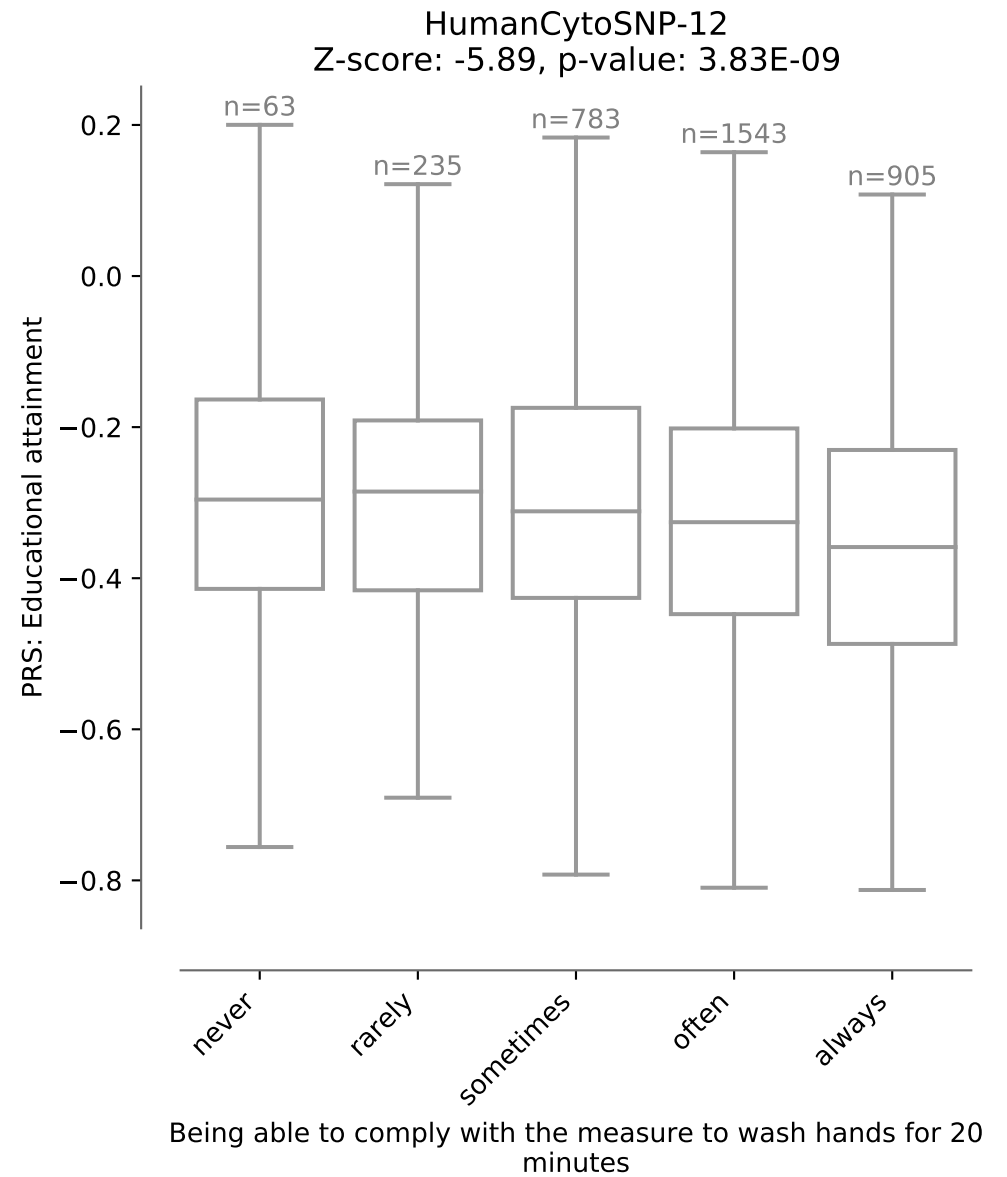

# BMI

PGS: Accelerometer-based physical activity  
Meta analysis Z-score: -7.32, p-value: 2.55E-13

Global Screening Array  
Z-score: -6.56, p-value: 5.32E-11

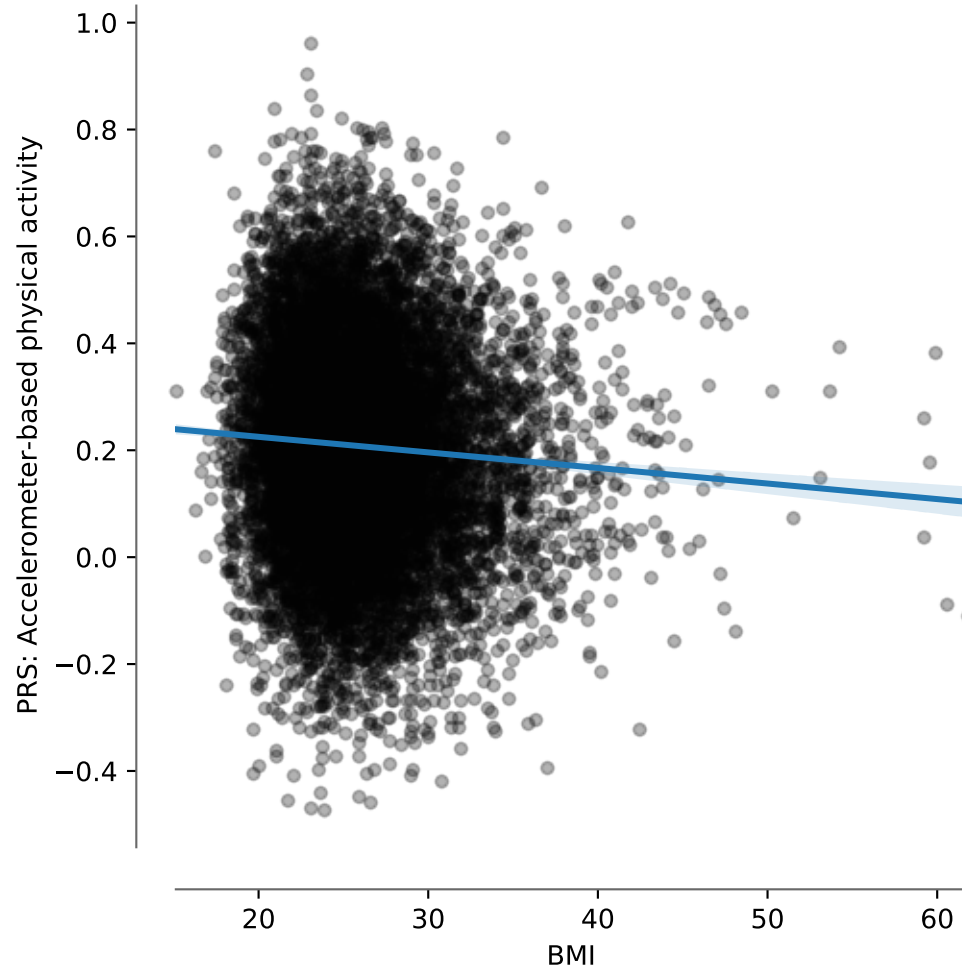

HumanCytoSNP-12  
Z-score: -3.30, p-value: 9.73E-04

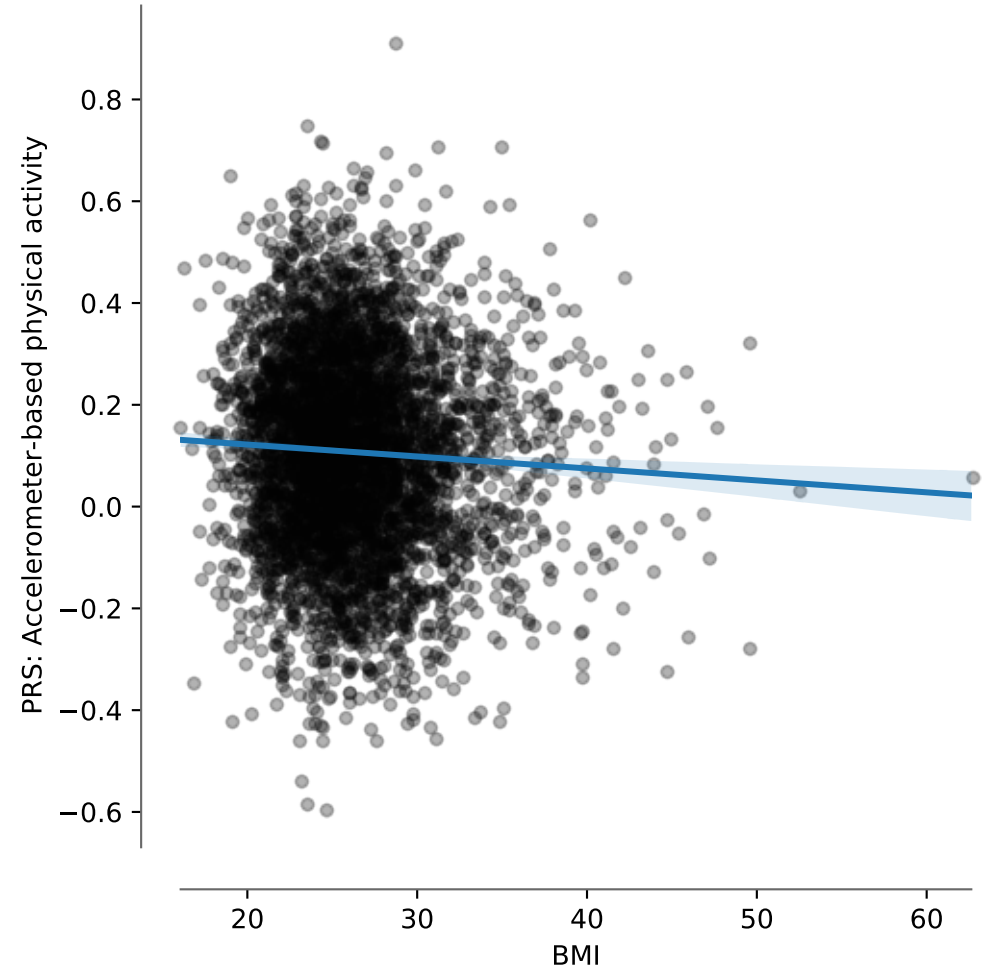

BMI  
PGS: Anxiety/tension  
Meta analysis Z-score: -13.22, p-value: 6.70E-40

Global Screening Array  
Z-score: -11.17, p-value: 5.57E-29

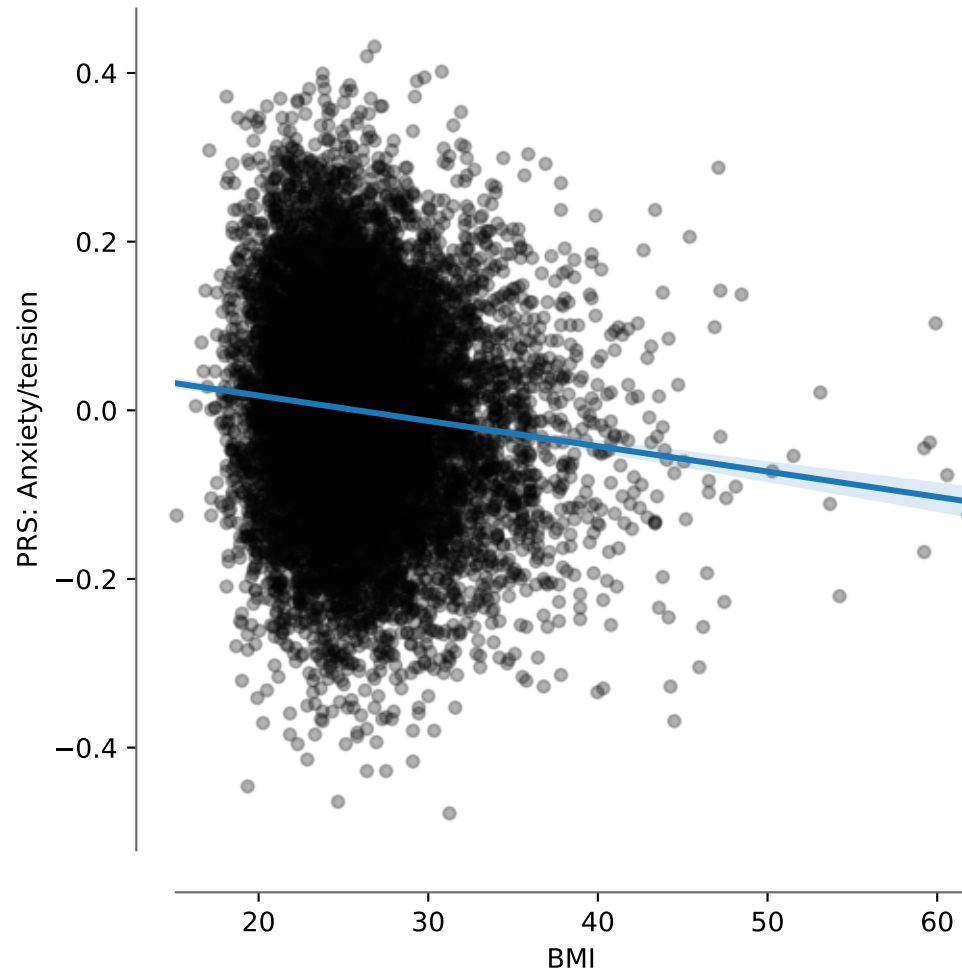

HumanCytoSNP-12  
Z-score: -7.00, p-value: 2.52E-12

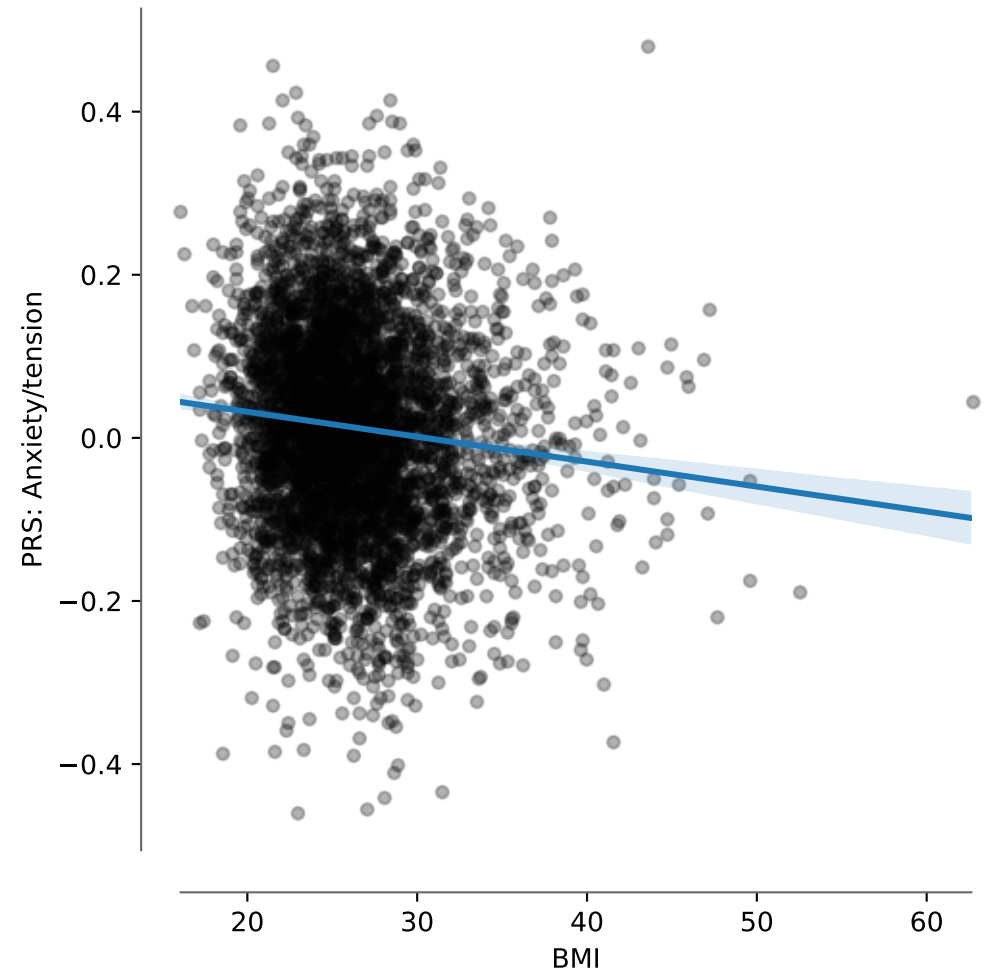

BMI  
PGS: BMI  
Meta analysis Z-score: 42.07, p-value: 0.00E+00

Global Screening Array  
Z-score: 34.53, p-value: 3.34E-261

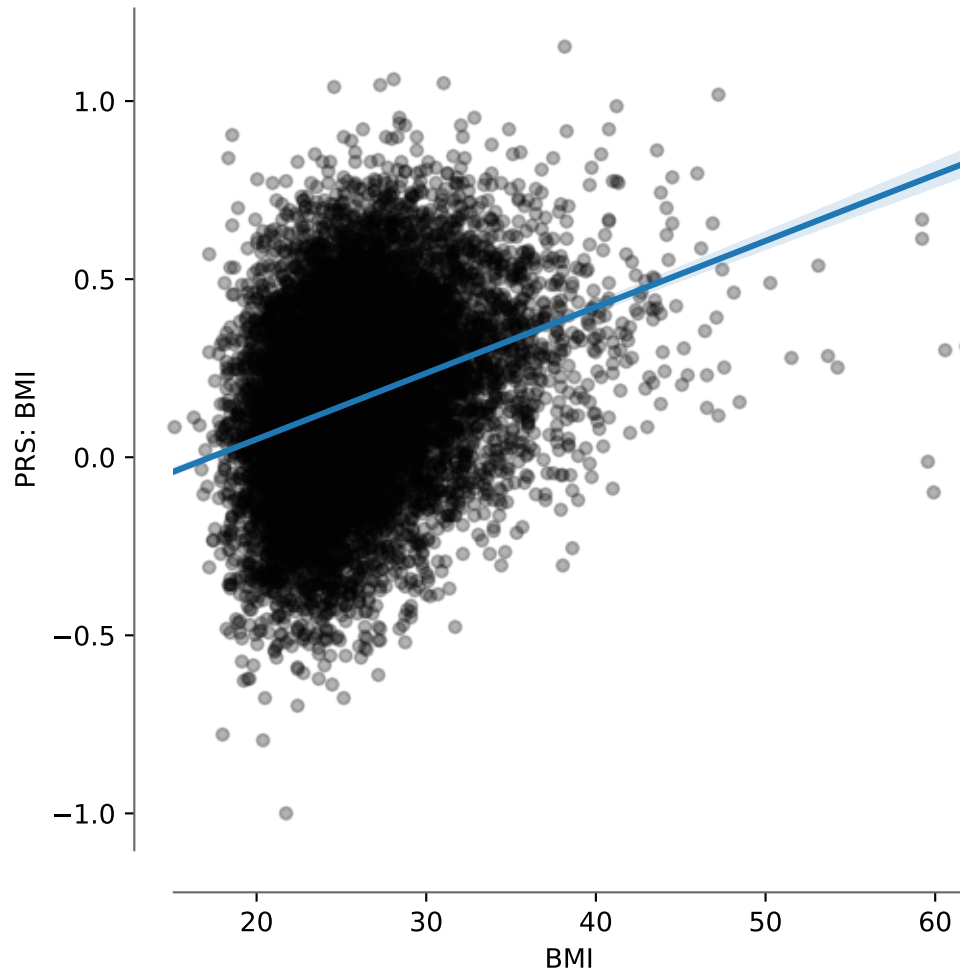

HumanCytoSNP-12  
Z-score: 22.13, p-value: 1.61E-108

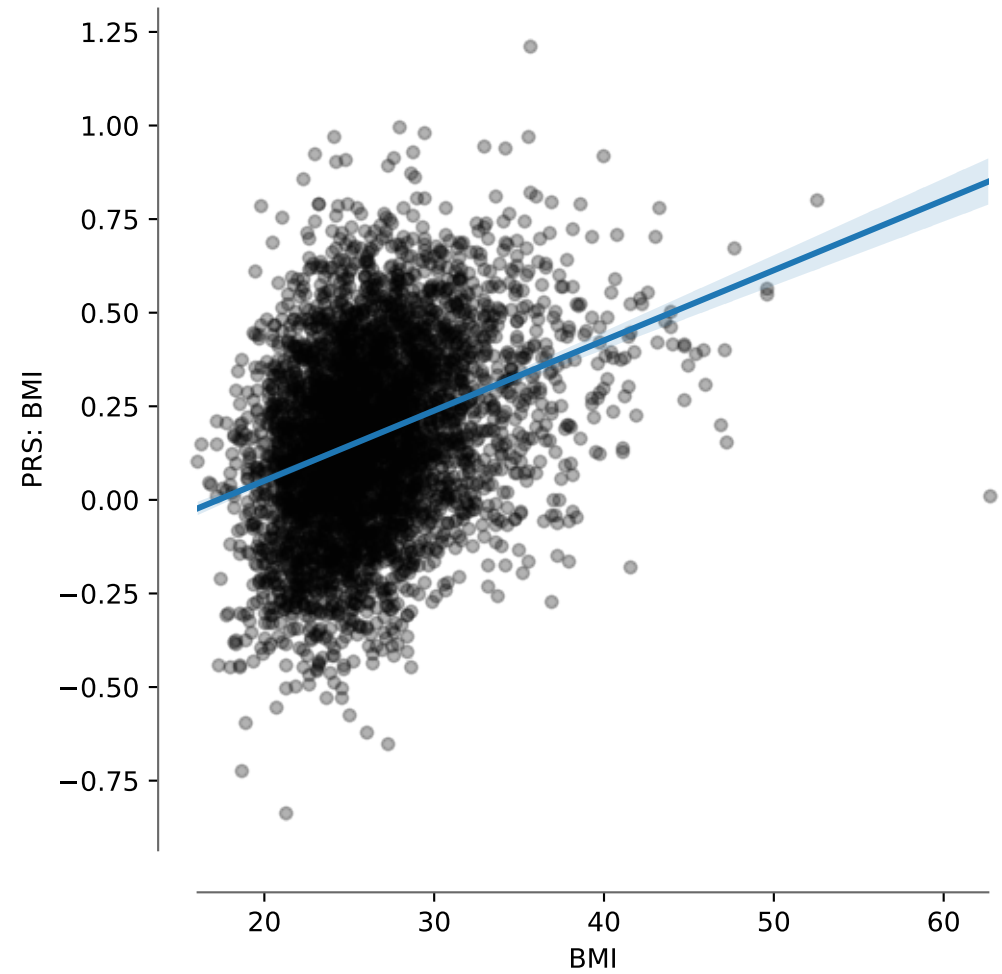

BMI  
PGS: Tabacco use  
Meta analysis Z-score: 10.03, p-value: 1.15E-23

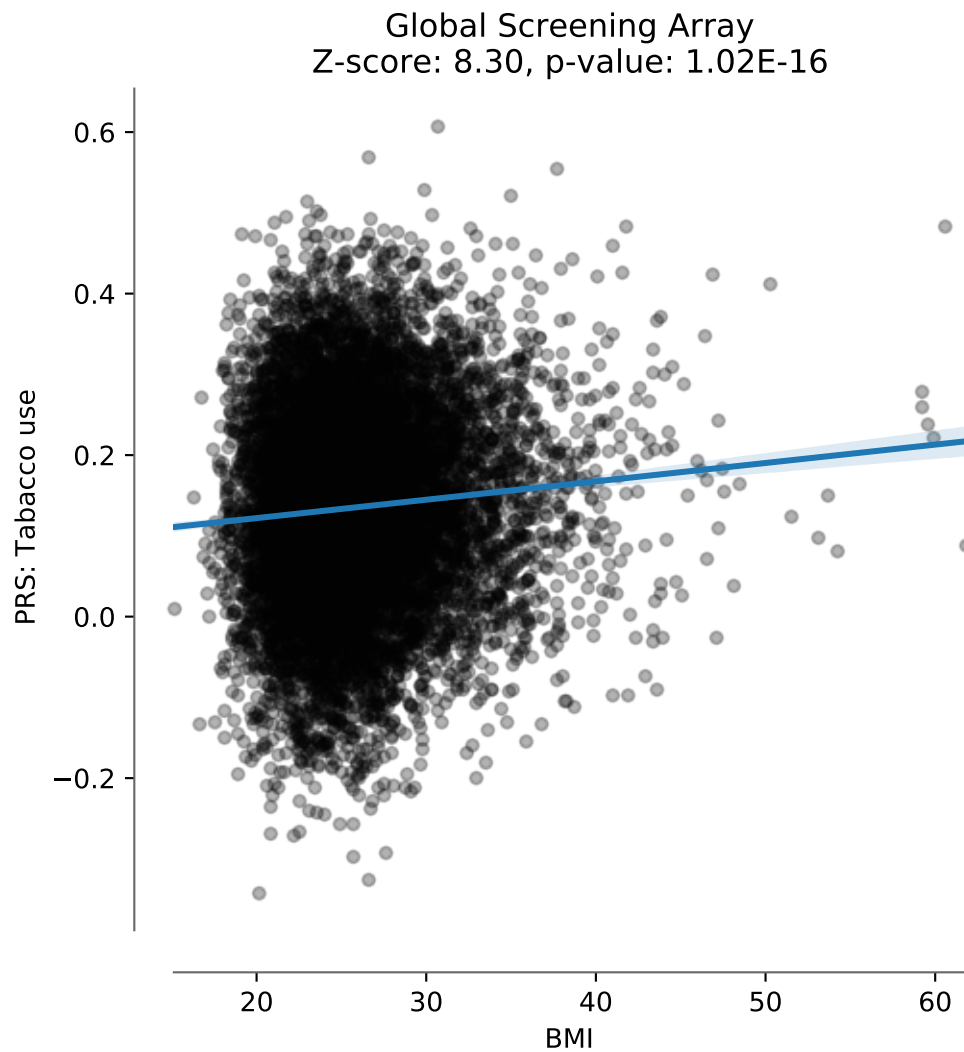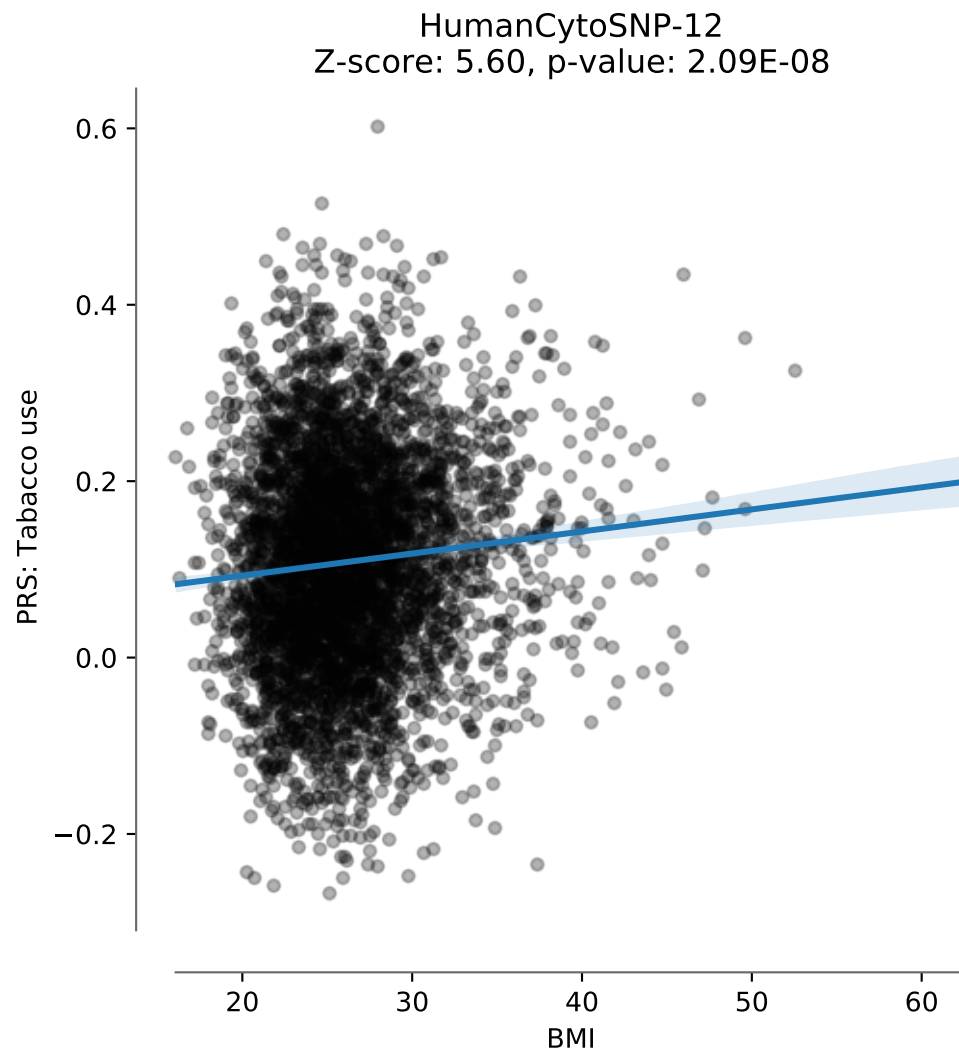

BMI  
PGS: Educational attainment  
Meta analysis Z-score: -14.92, p-value: 2.44E-50

Global Screening Array  
Z-score: -10.99, p-value: 4.17E-28

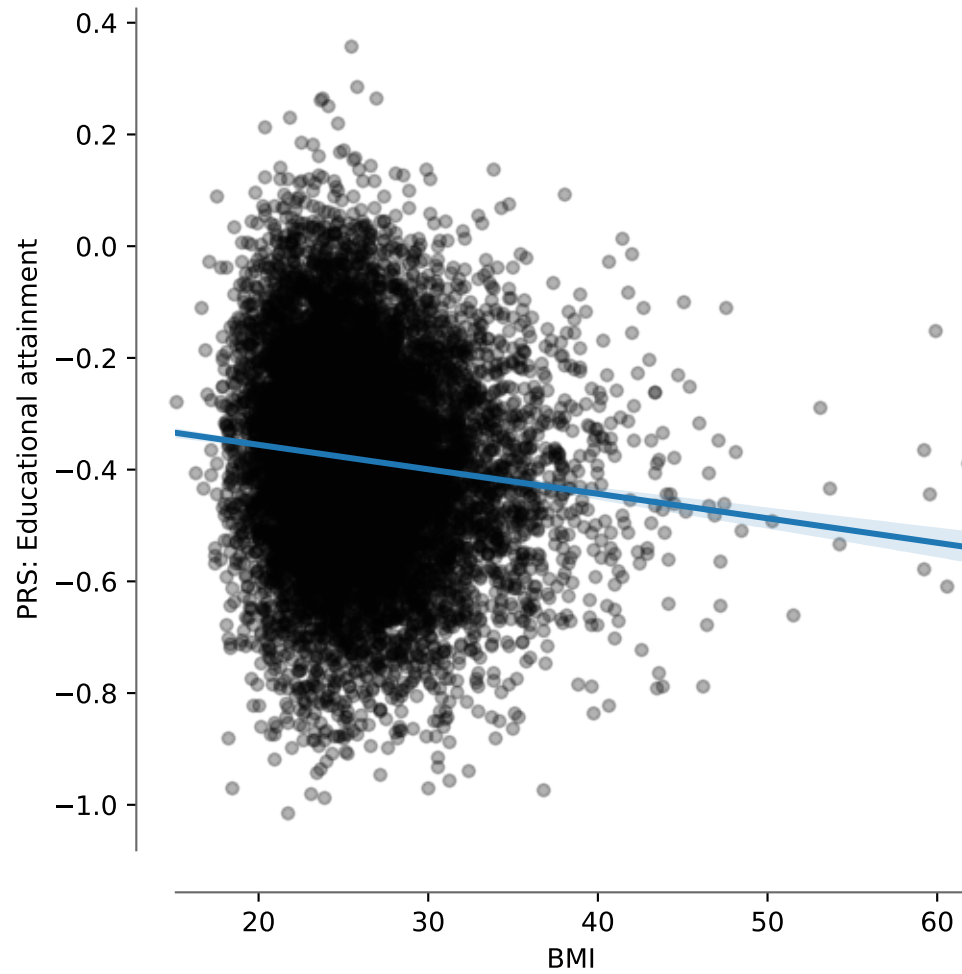

HumanCytoSNP-12  
Z-score: -10.31, p-value: 6.59E-25

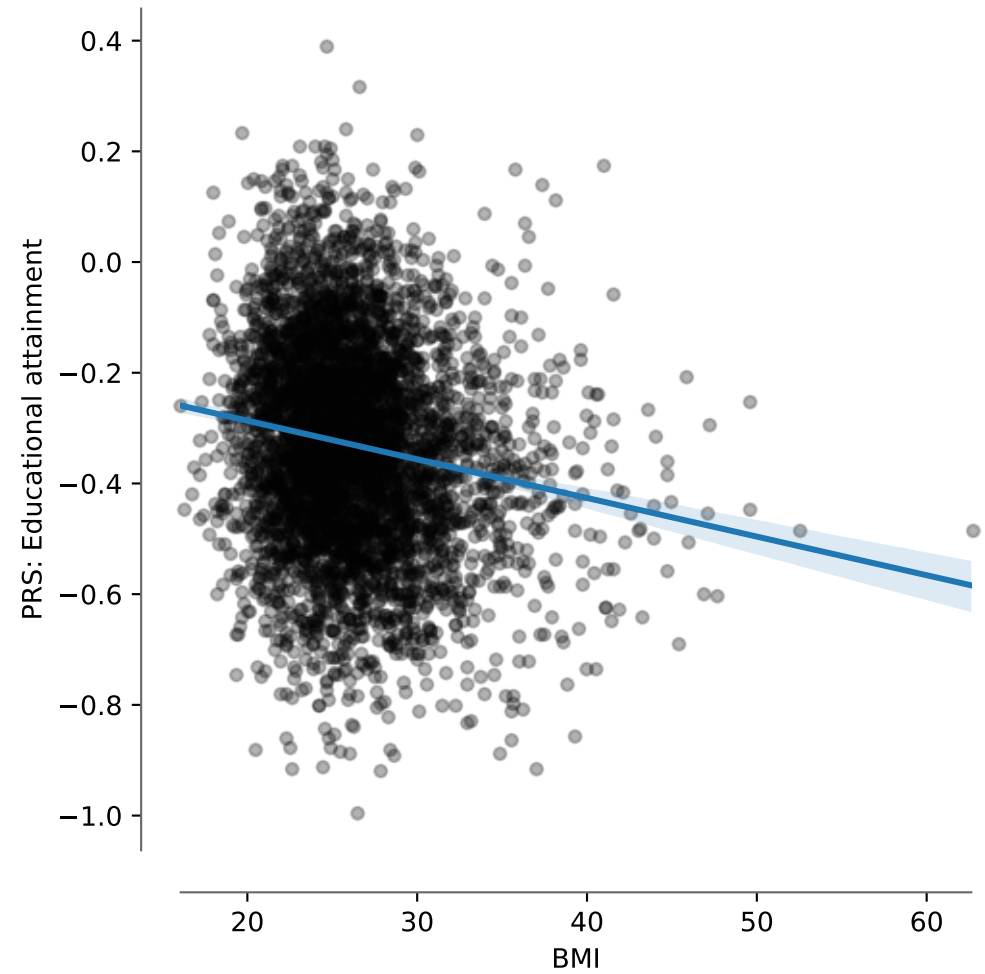

BMI  
PGS: Worry/vulnerability  
Meta analysis Z-score: -8.86, p-value: 7.76E-19

Global Screening Array  
Z-score: -7.45, p-value: 9.29E-14

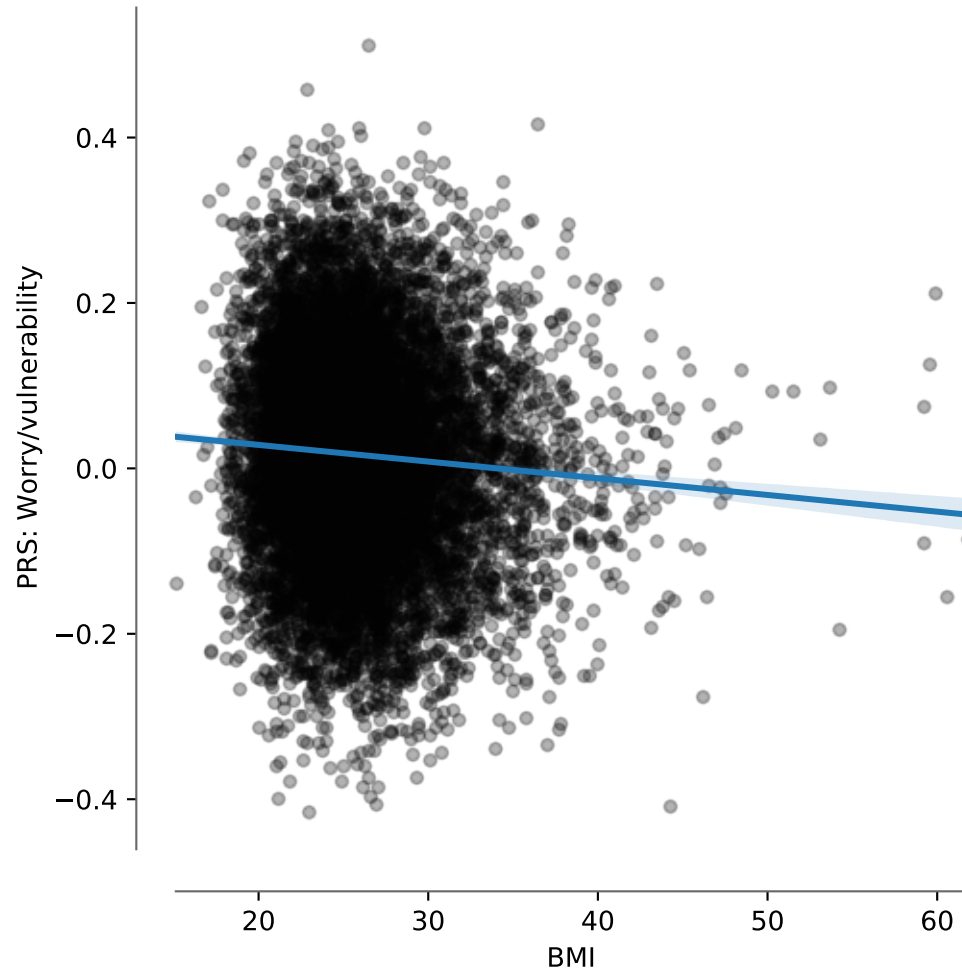

HumanCytoSNP-12  
Z-score: -4.78, p-value: 1.74E-06

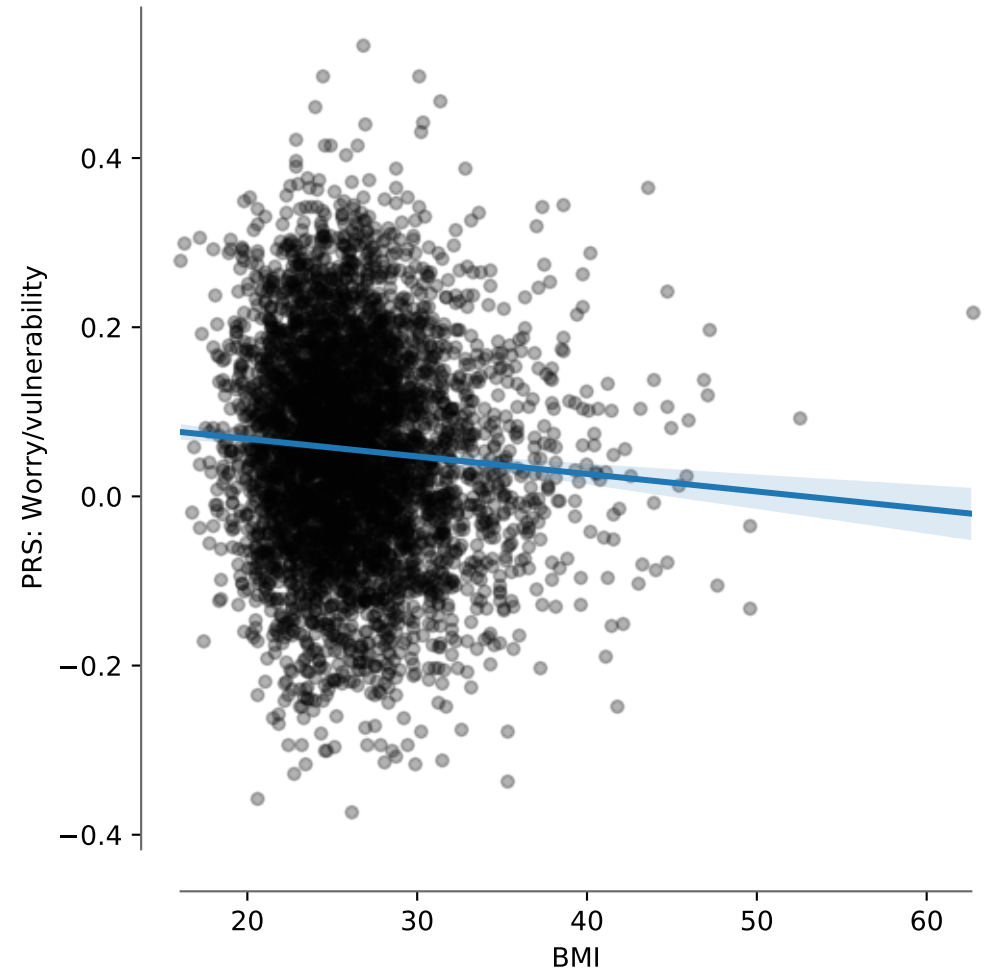



Depressive score  
PGS: Life satisfaction  
Meta analysis Z-score: -4.71, p-value: 2.54E-06

Global Screening Array  
Z-score: -3.54, p-value: 4.04E-04

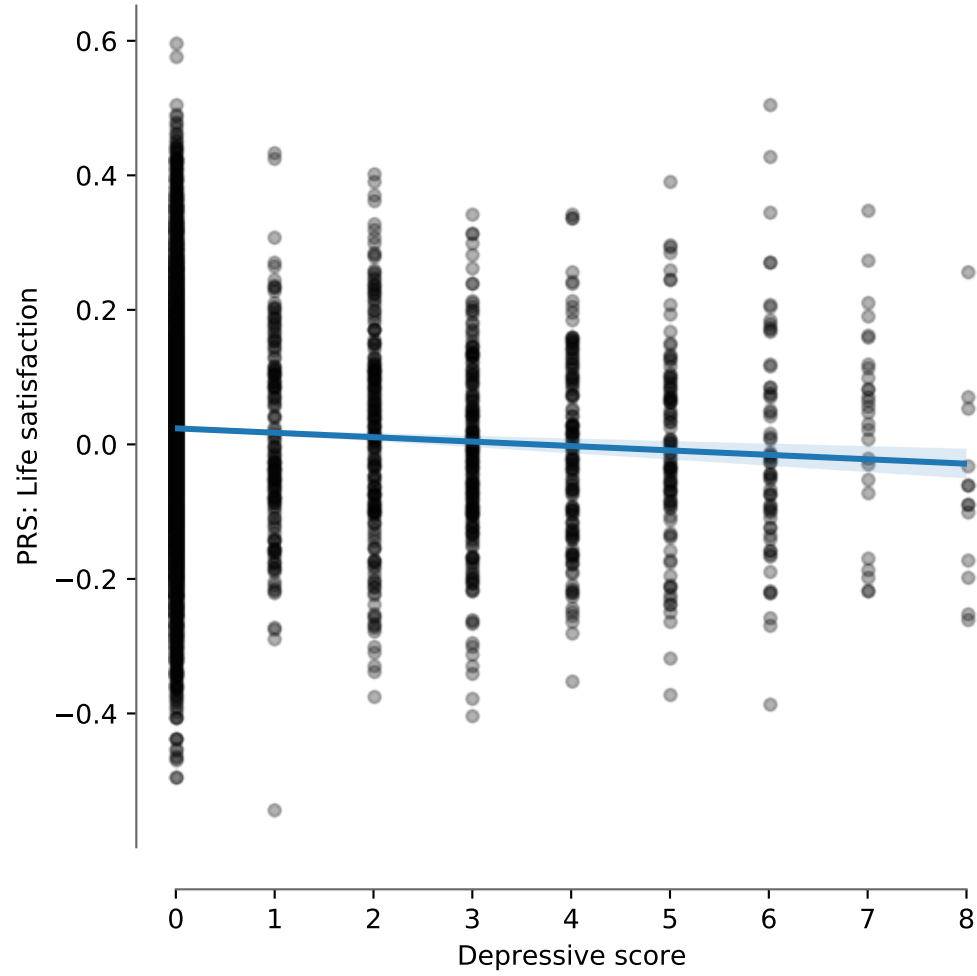

HumanCytoSNP-12  
Z-score: -3.24, p-value: 1.19E-03

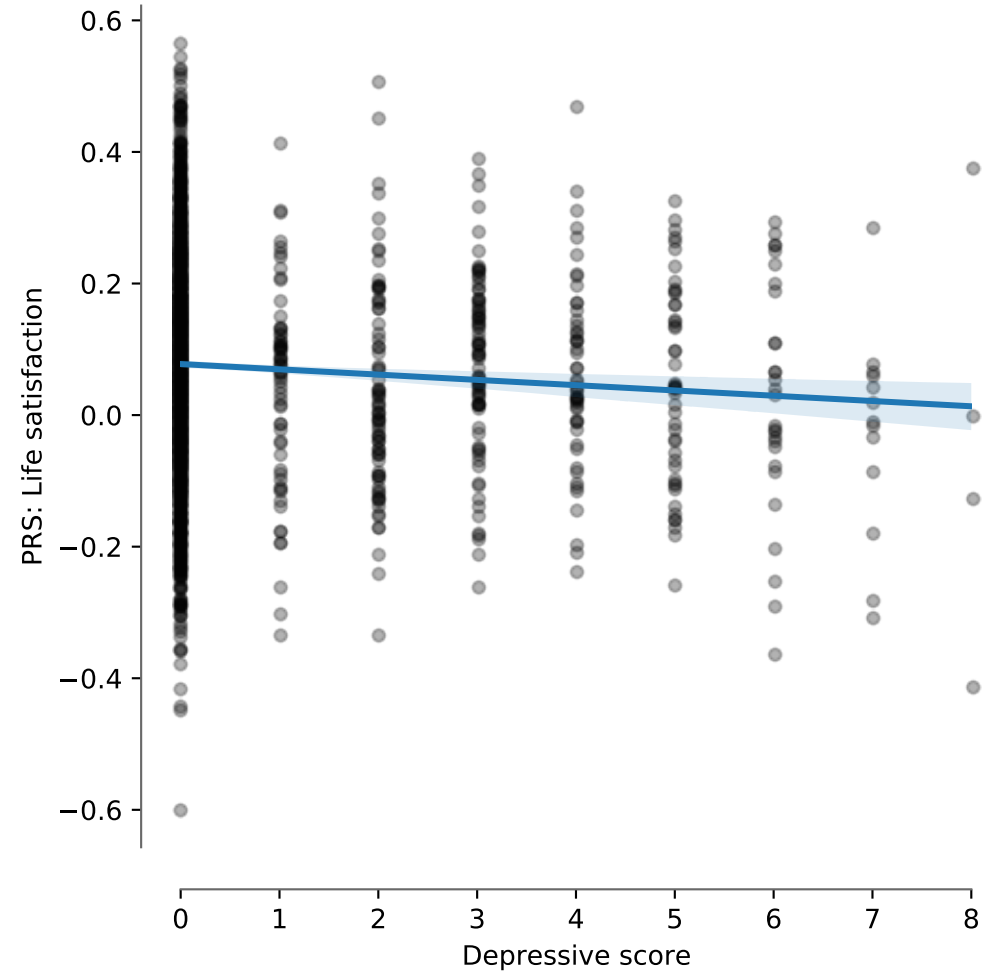

Depressive score  
PGS: Neuroticism  
Meta analysis Z-score: 4.72, p-value: 2.35E-06

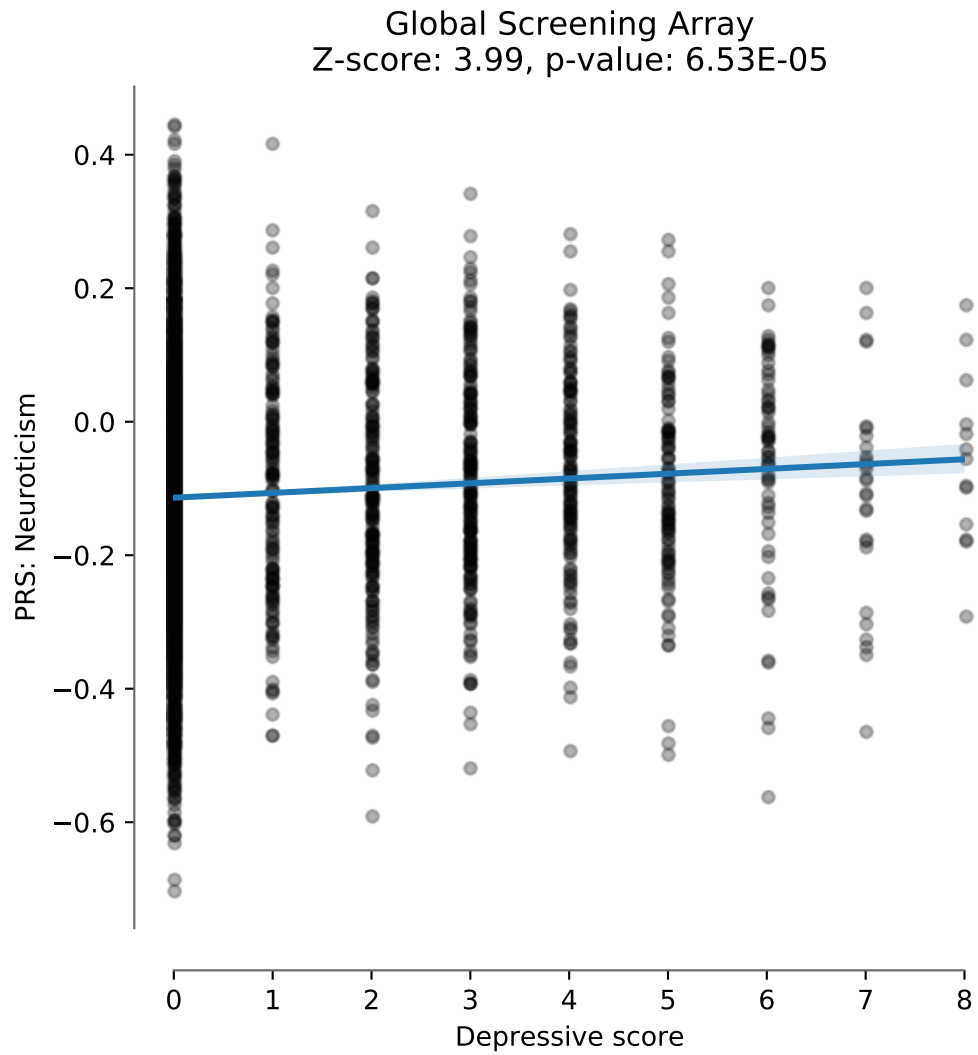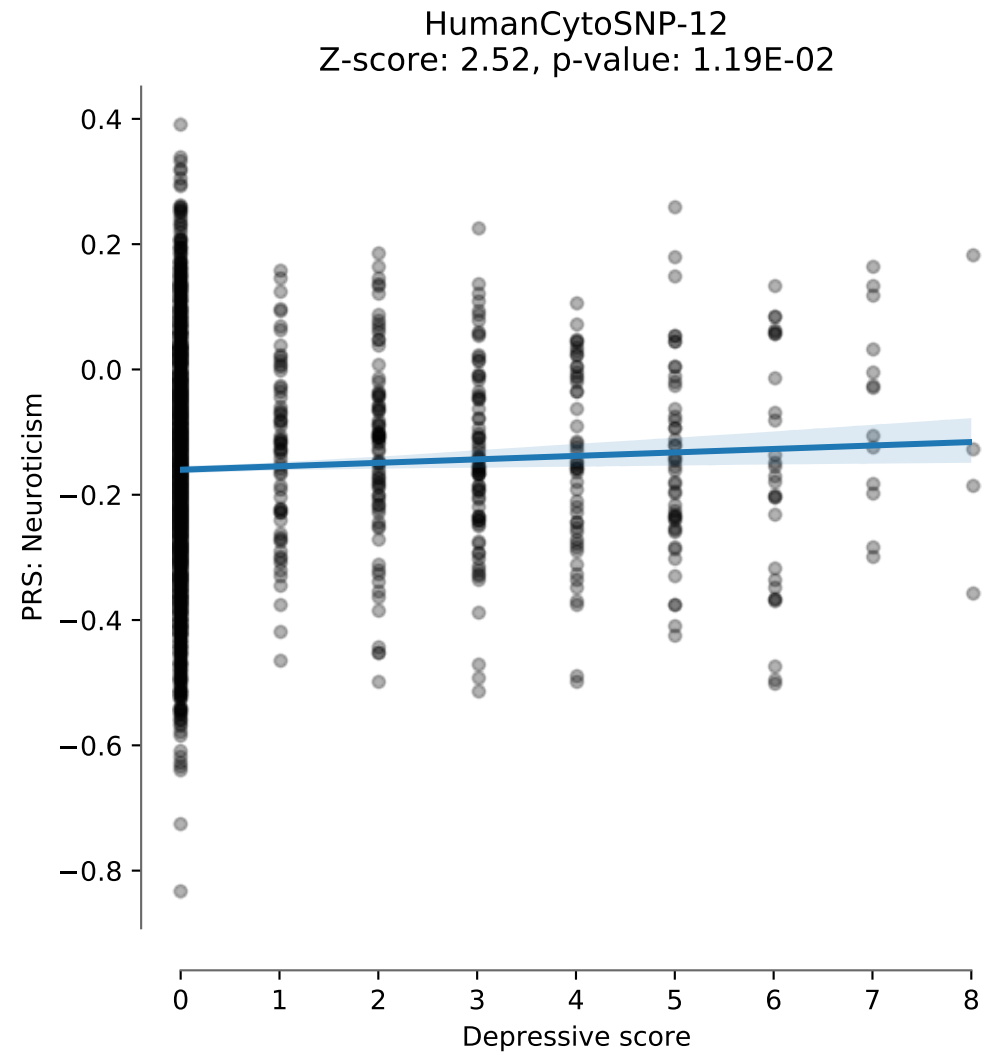

Ever positive SARS-CoV-2 PCR test  
PGS: COVID-19 susceptibility  
Meta analysis Z-score: 9.79, p-value: 1.28E-22

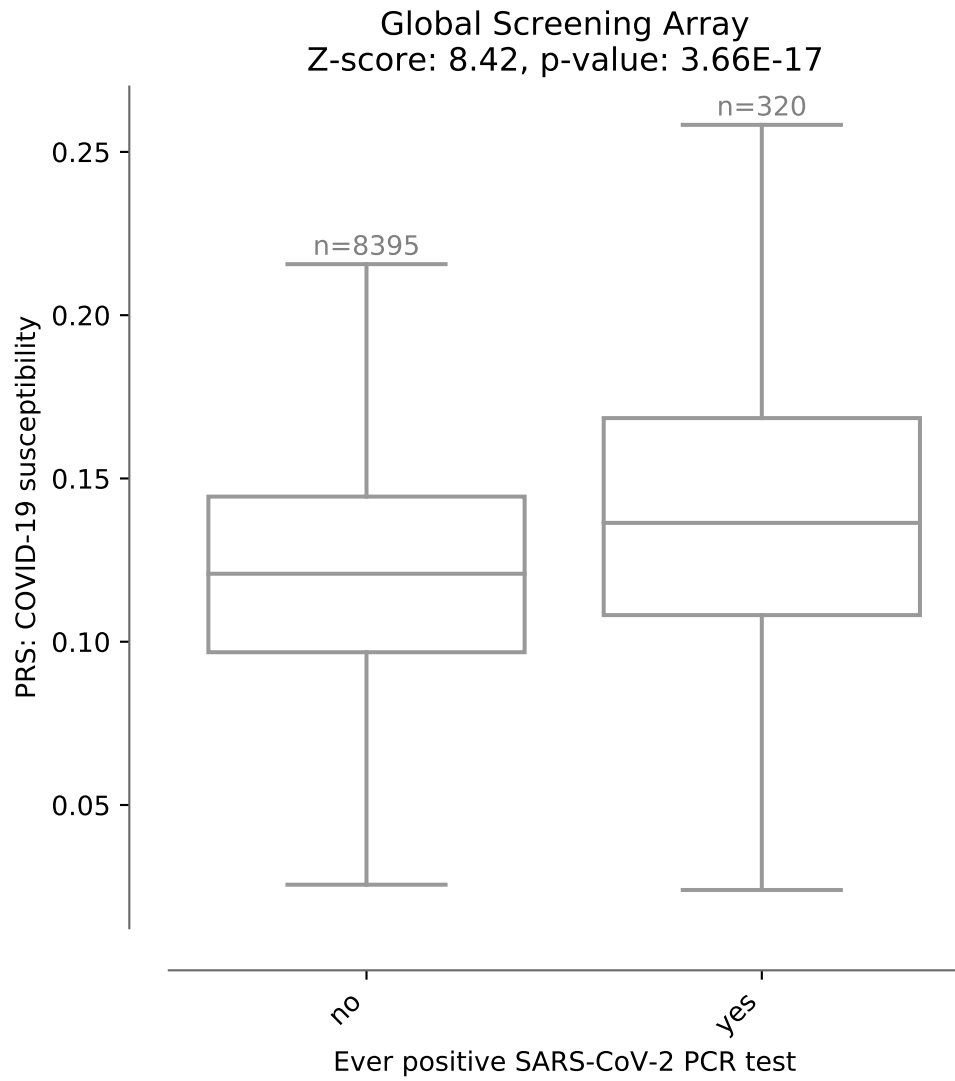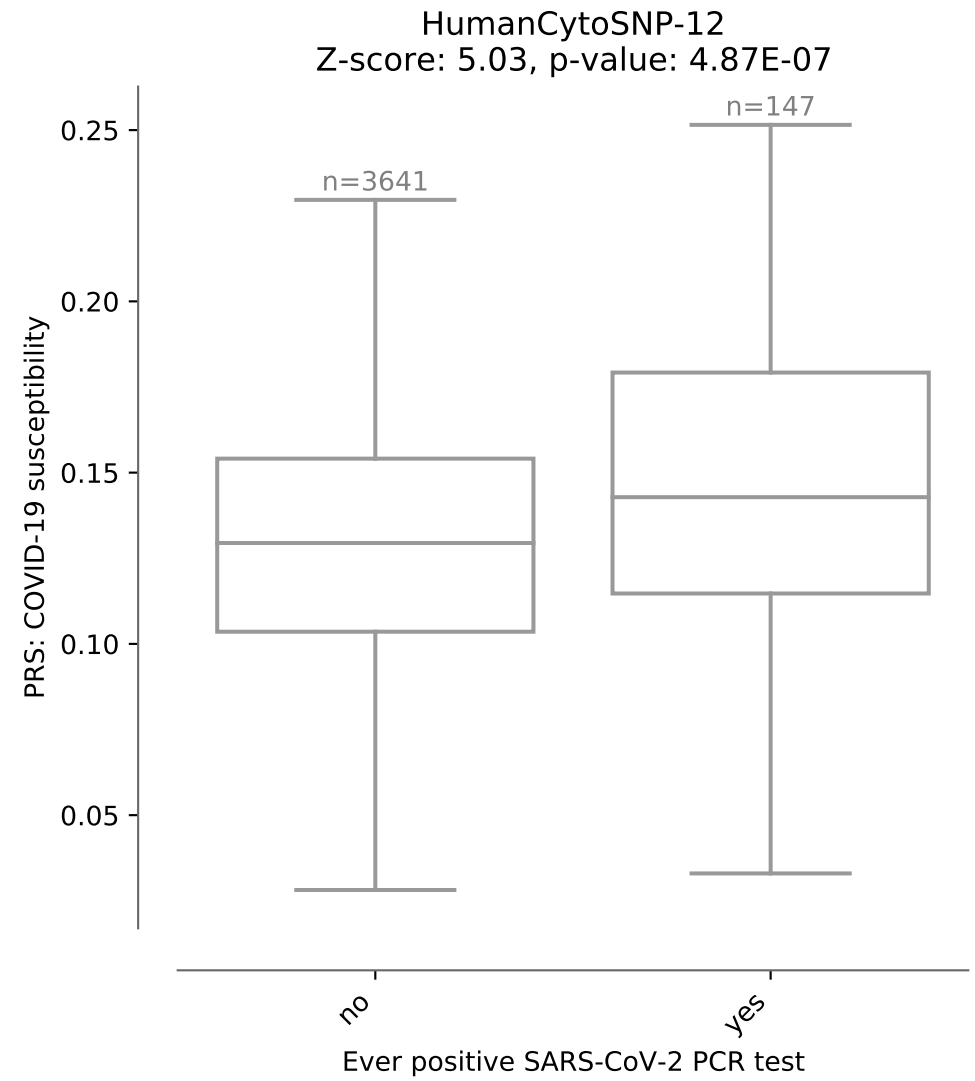

Felt attentive  
PGS: Educational attainment  
Meta analysis Z-score: 8.80, p-value: 1.35E-18

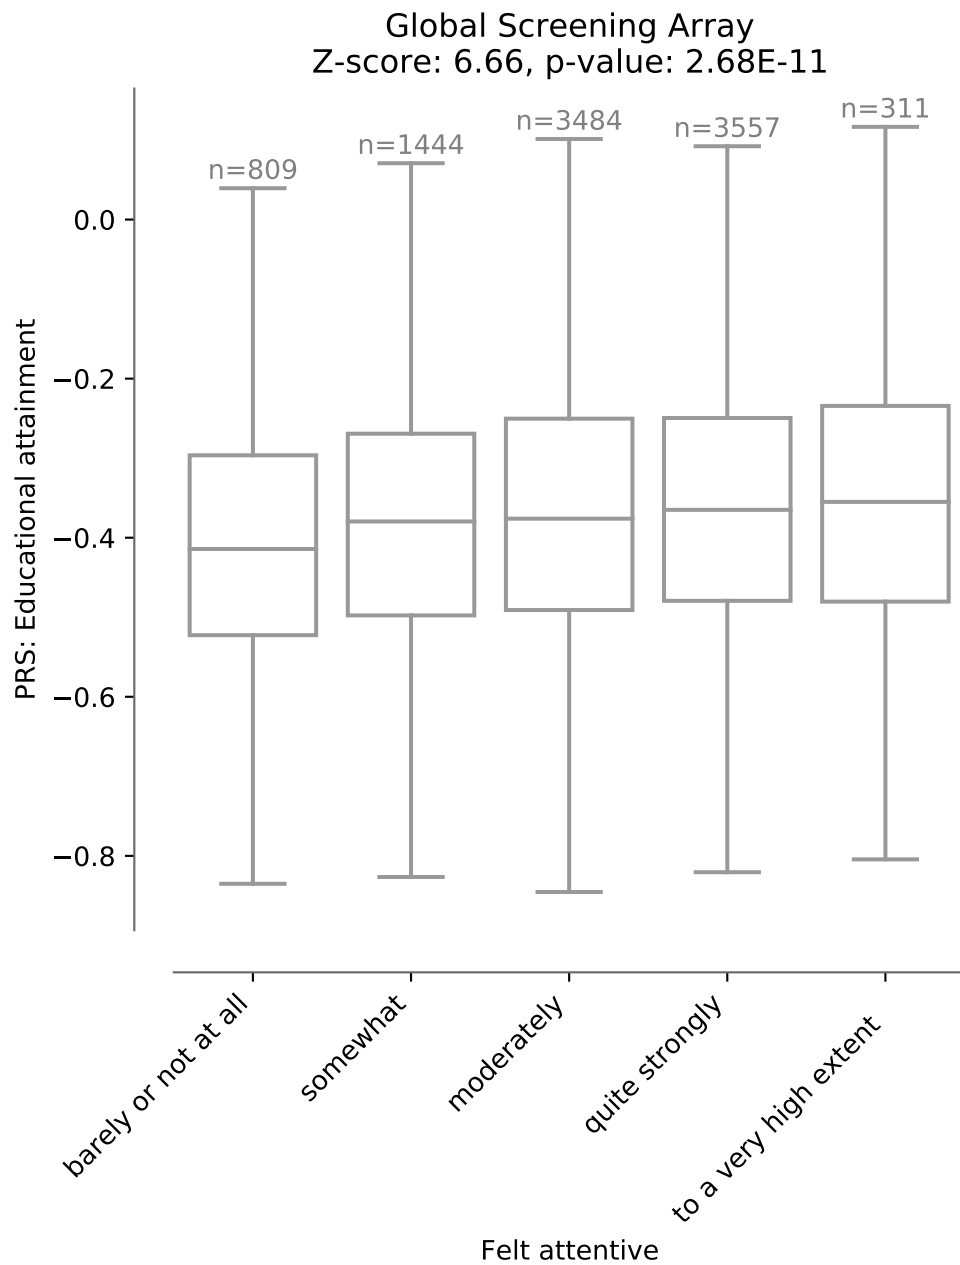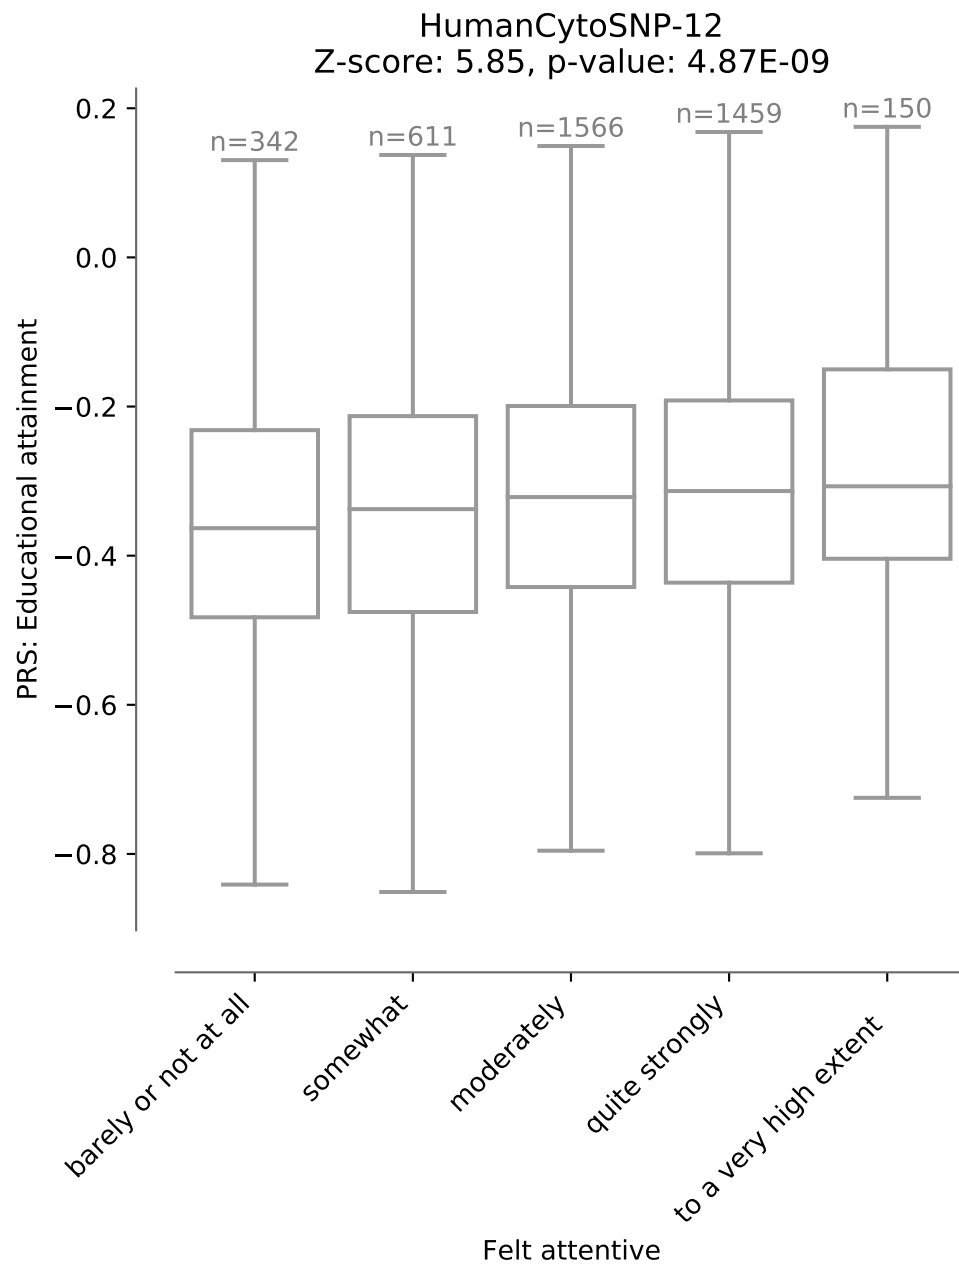

Felt active  
PGS: Accelerometer-based physical activity  
Meta analysis Z-score: 5.24, p-value: 1.56E-07

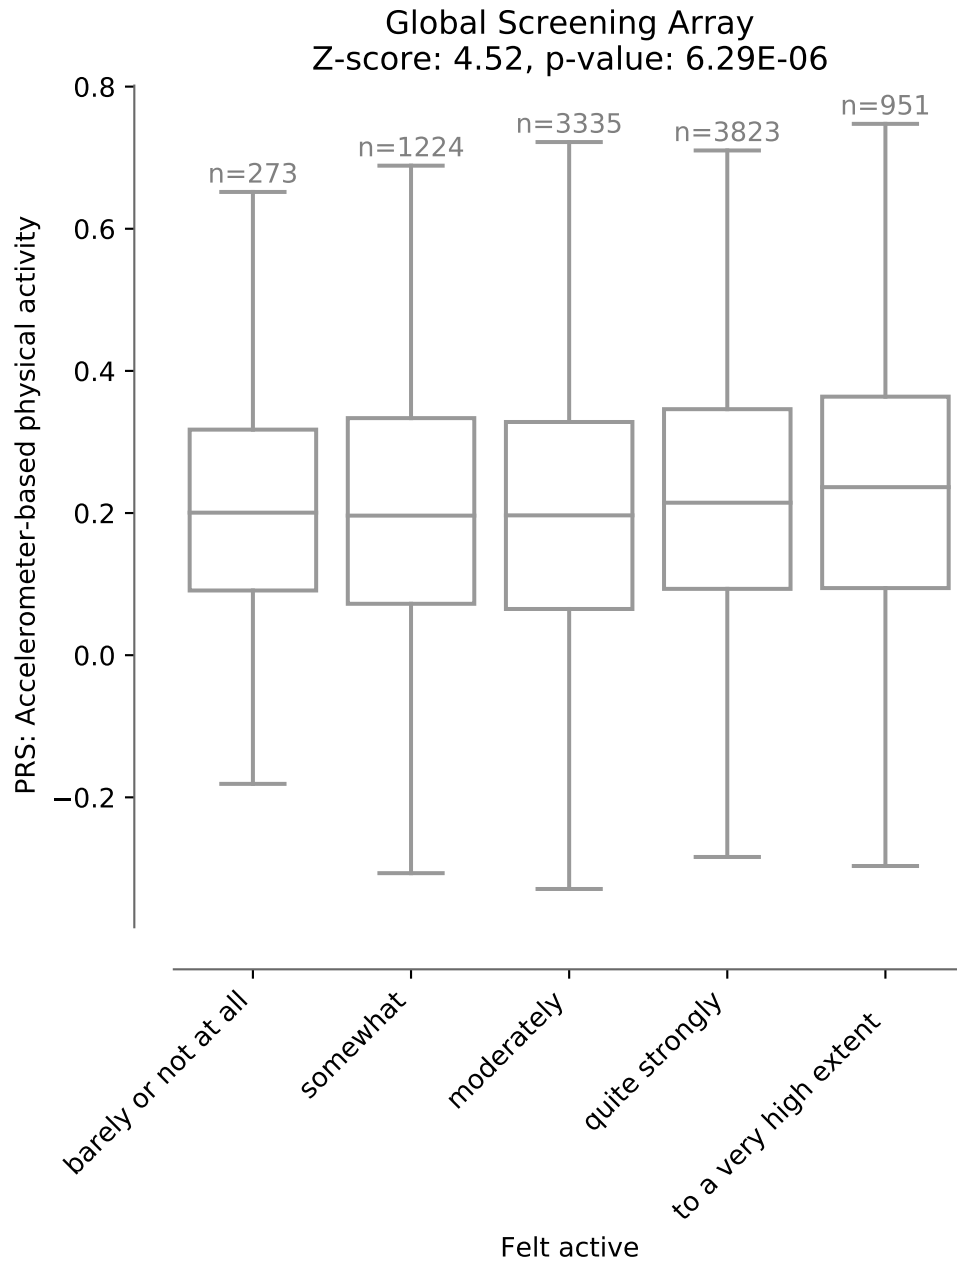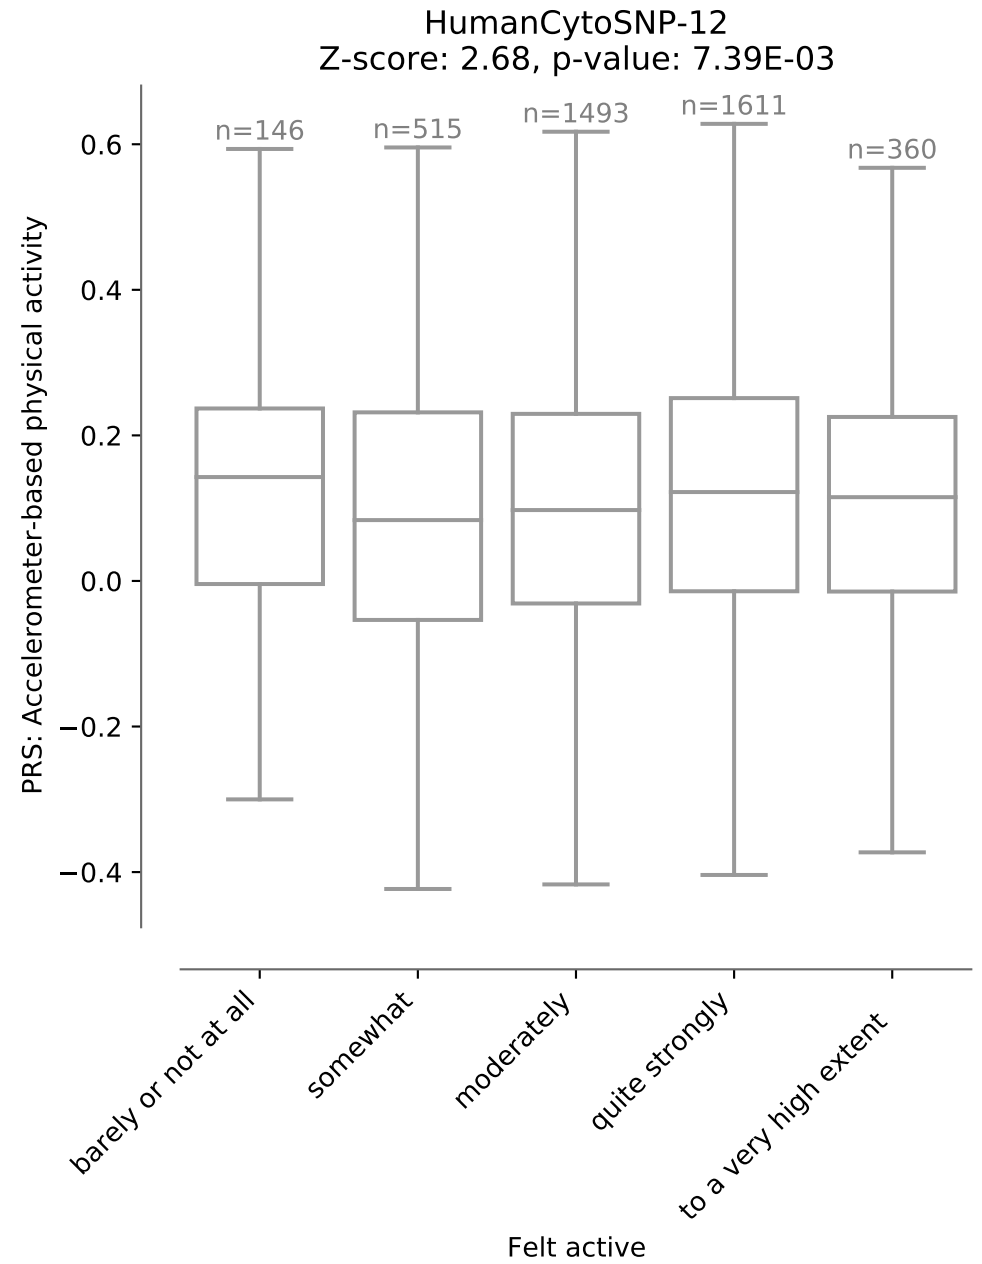

Felt active  
PGS: Educational attainment  
Meta analysis Z-score: 5.41, p-value: 6.41E-08

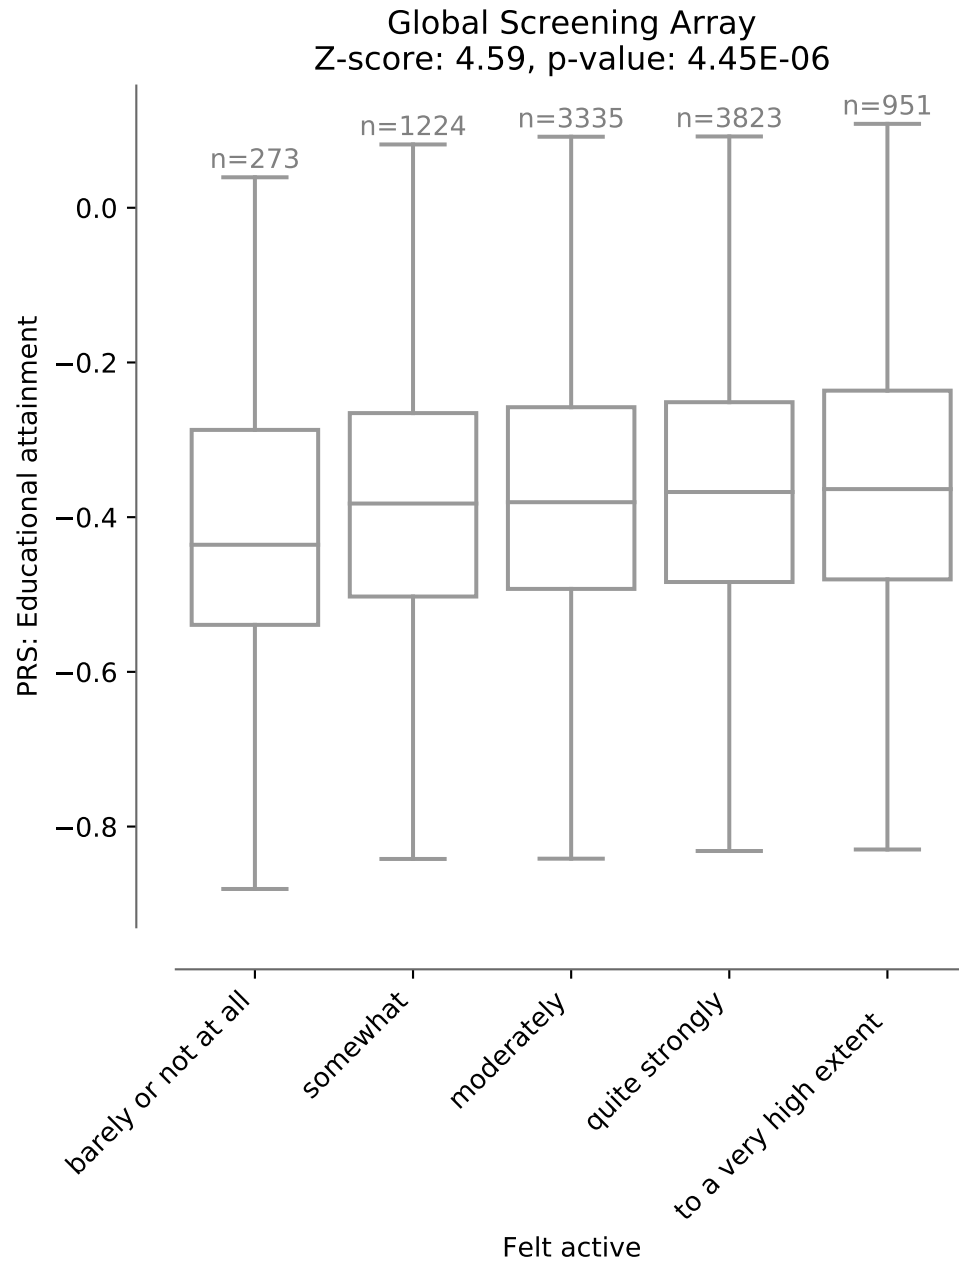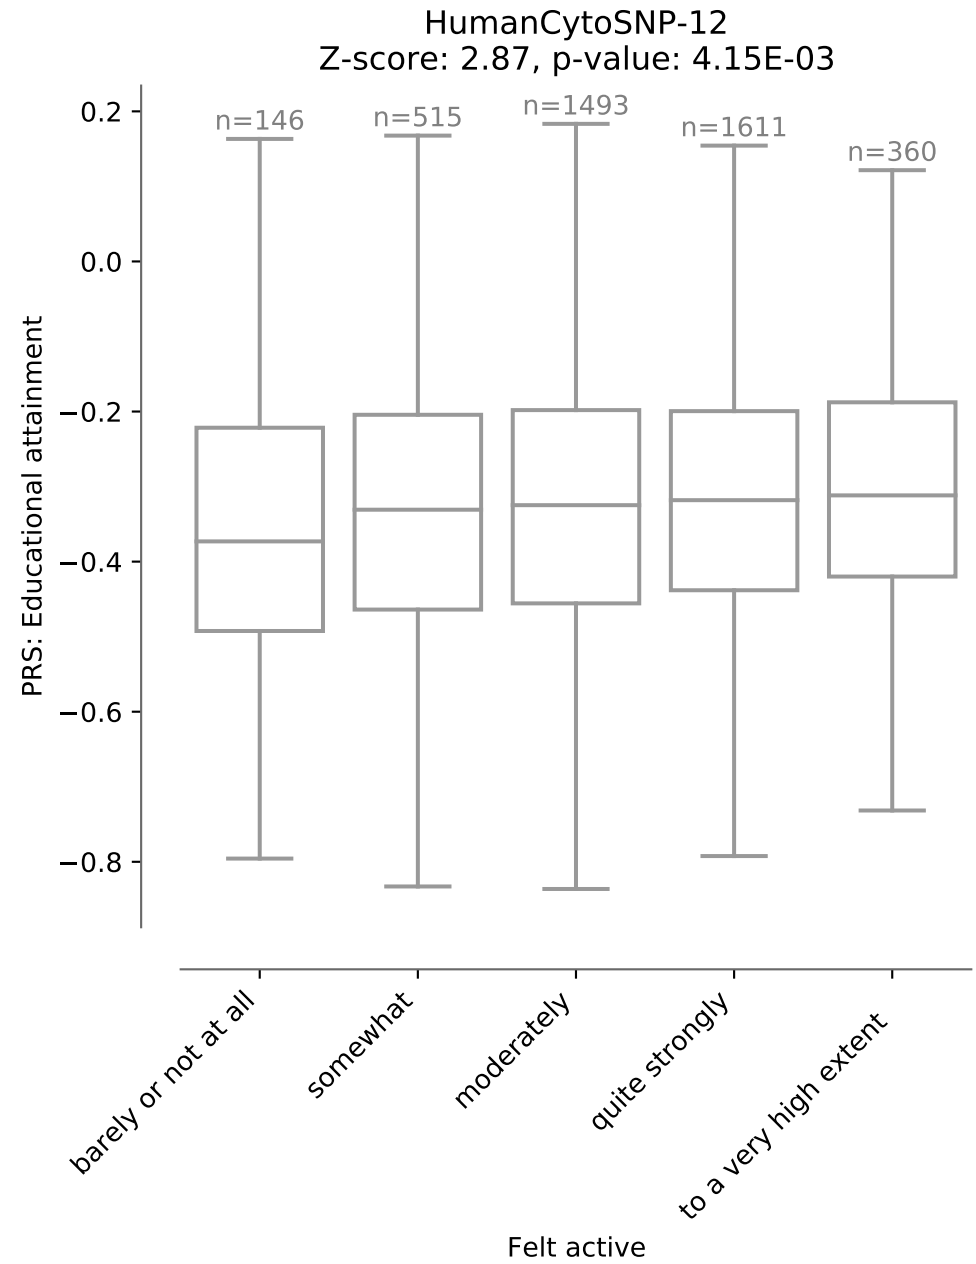

Having difficulty handling physical sensations in the body  
PGS: Anxiety/tension  
Meta analysis Z-score: 6.20, p-value: 5.73E-10

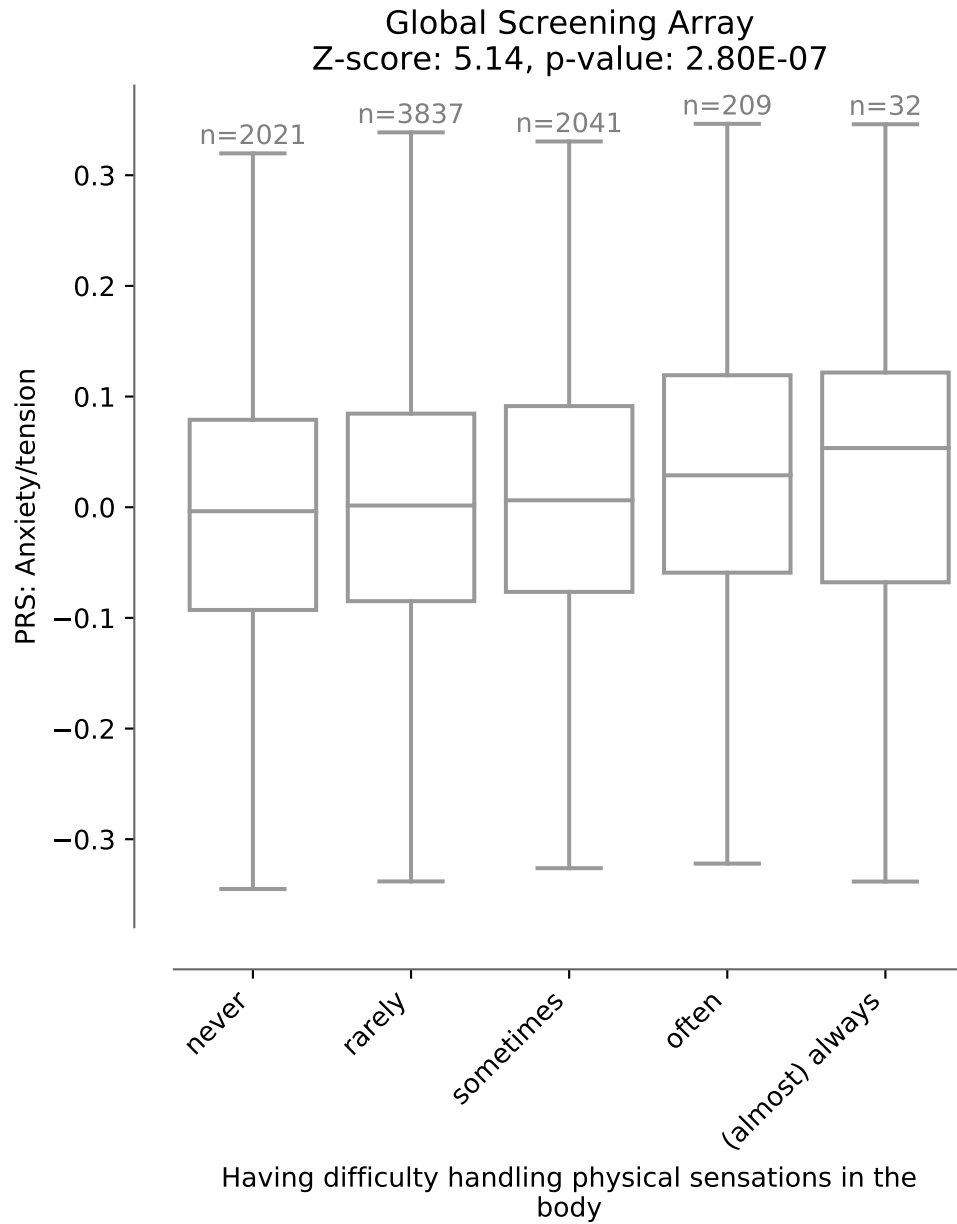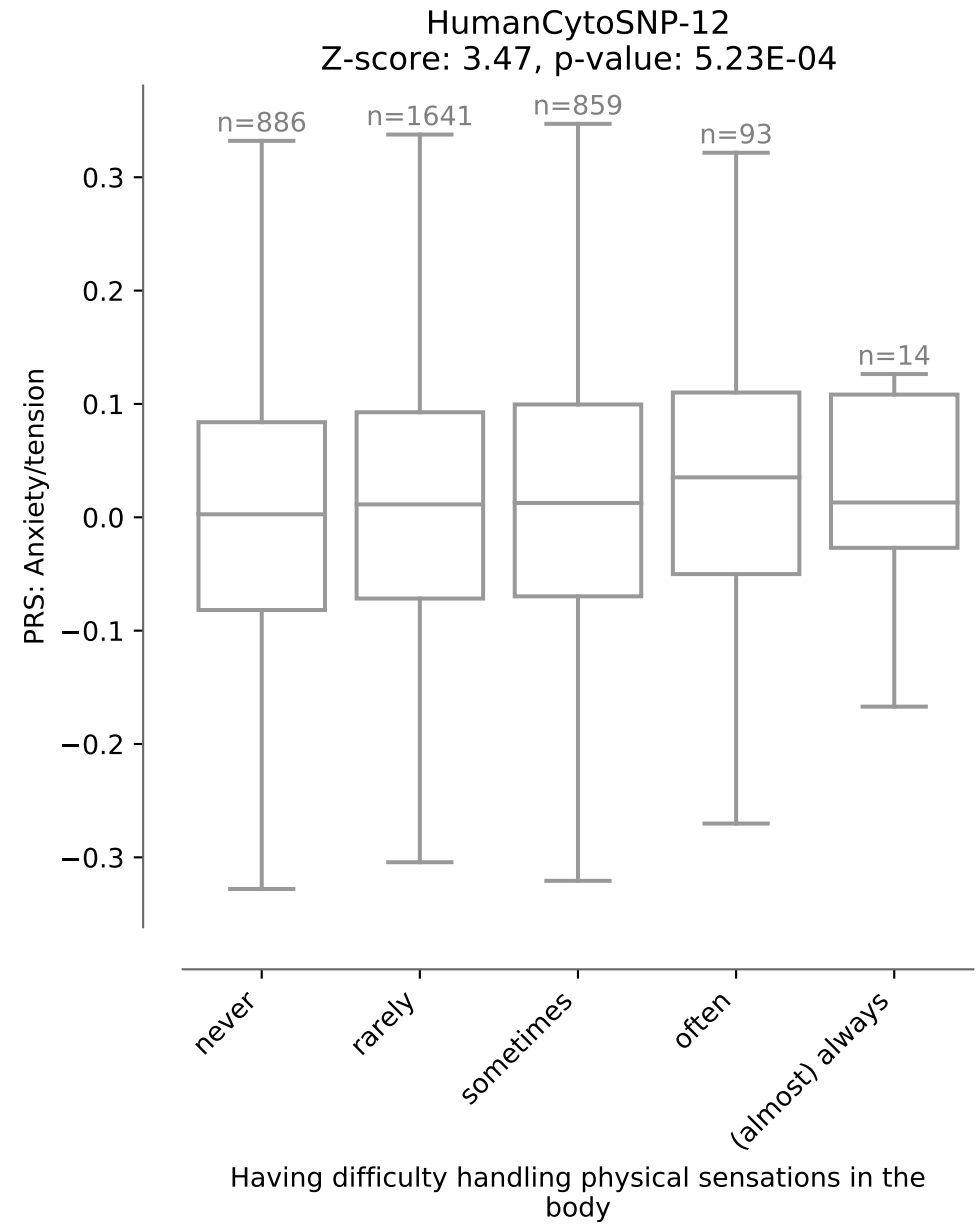

Having difficulty handling physical sensations in the body

PGS: BMI

Meta analysis Z-score: -4.55, p-value: 5.47E-06

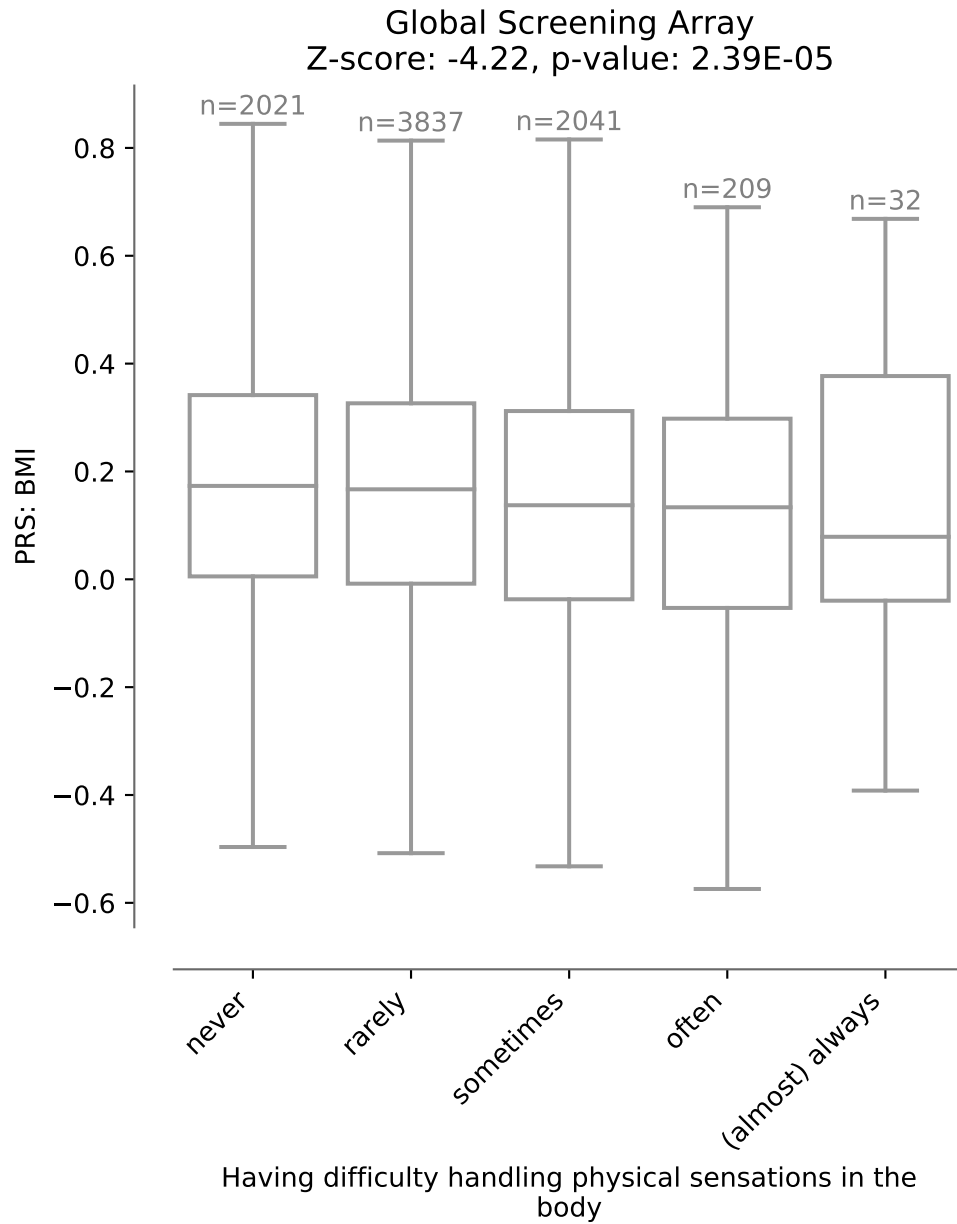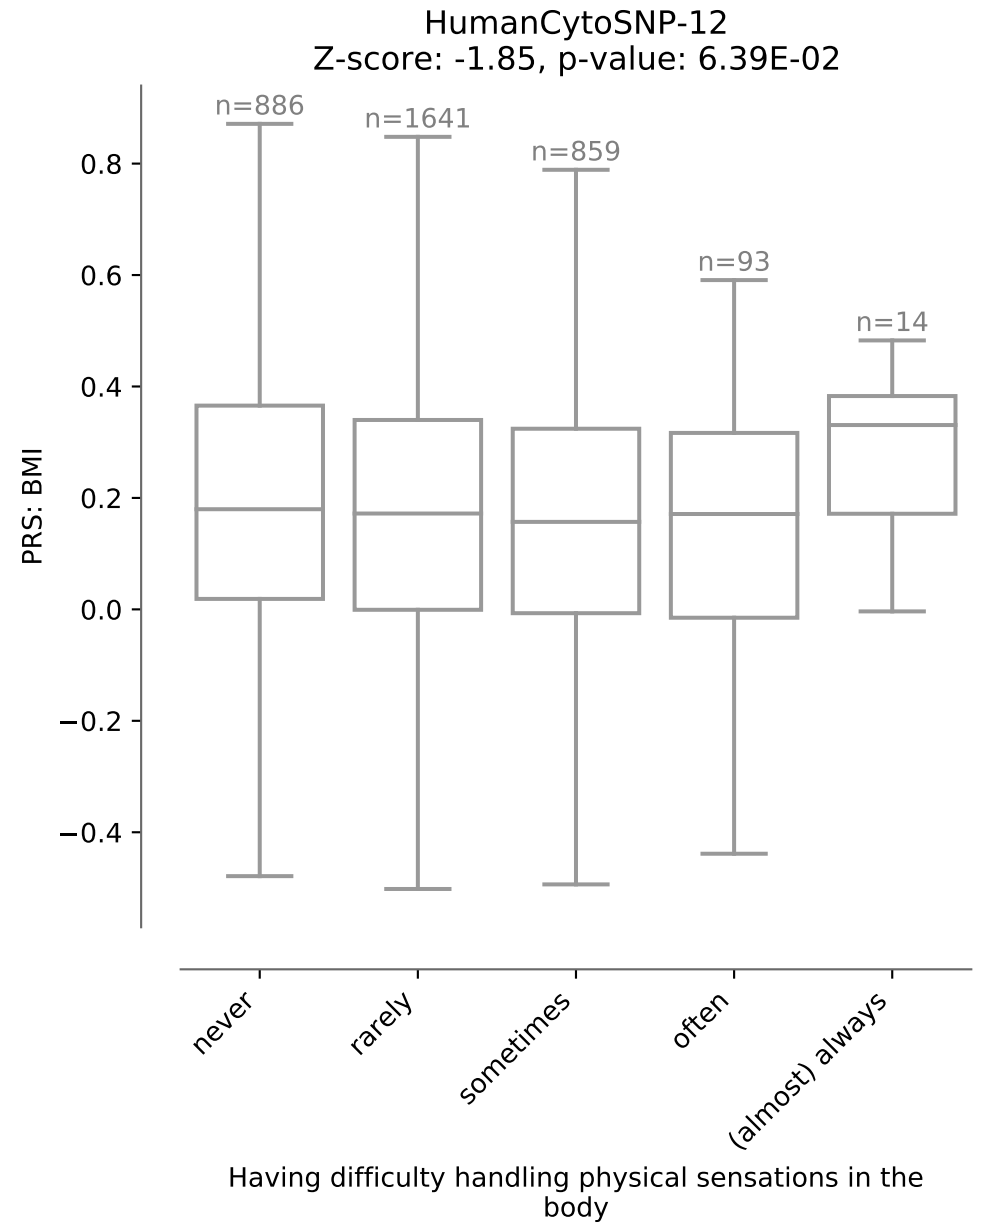



Having difficulty handling physical sensations in the body

PGS: Life satisfaction

Meta analysis Z-score: -4.95, p-value: 7.42E-07

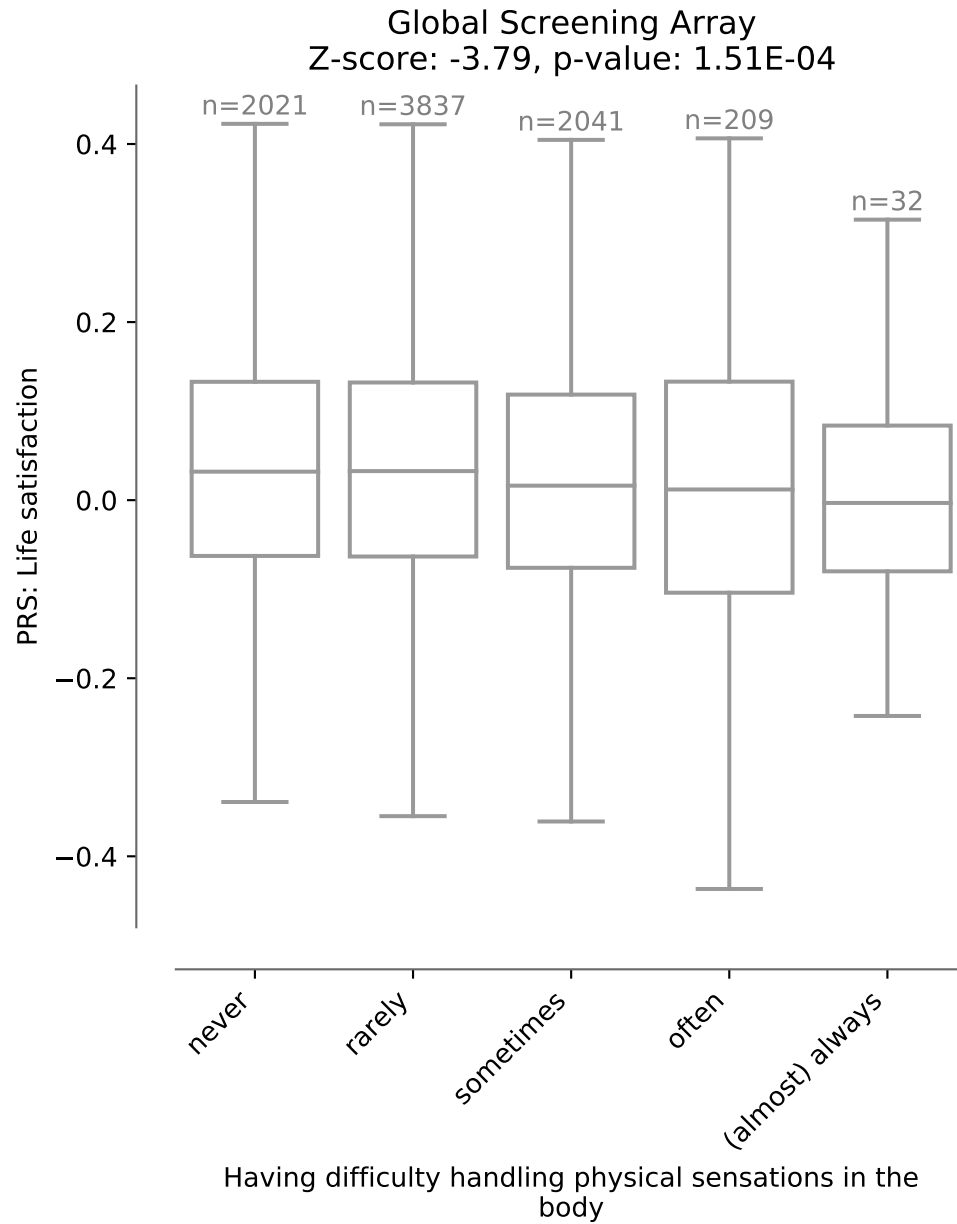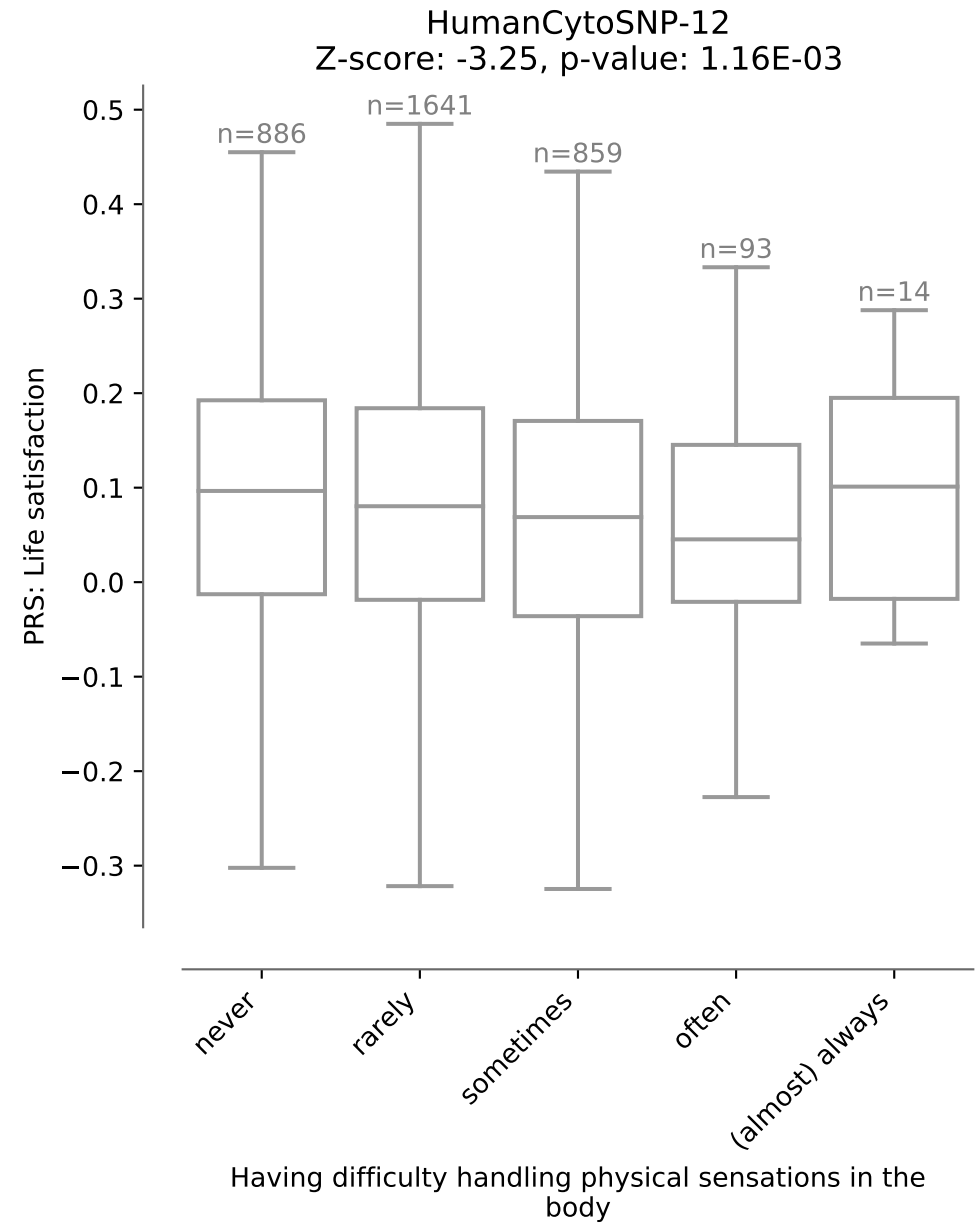

Having difficulty handling physical sensations in the body

PGS: Neuroticism

Meta analysis Z-score: 5.99, p-value: 2.11E-09

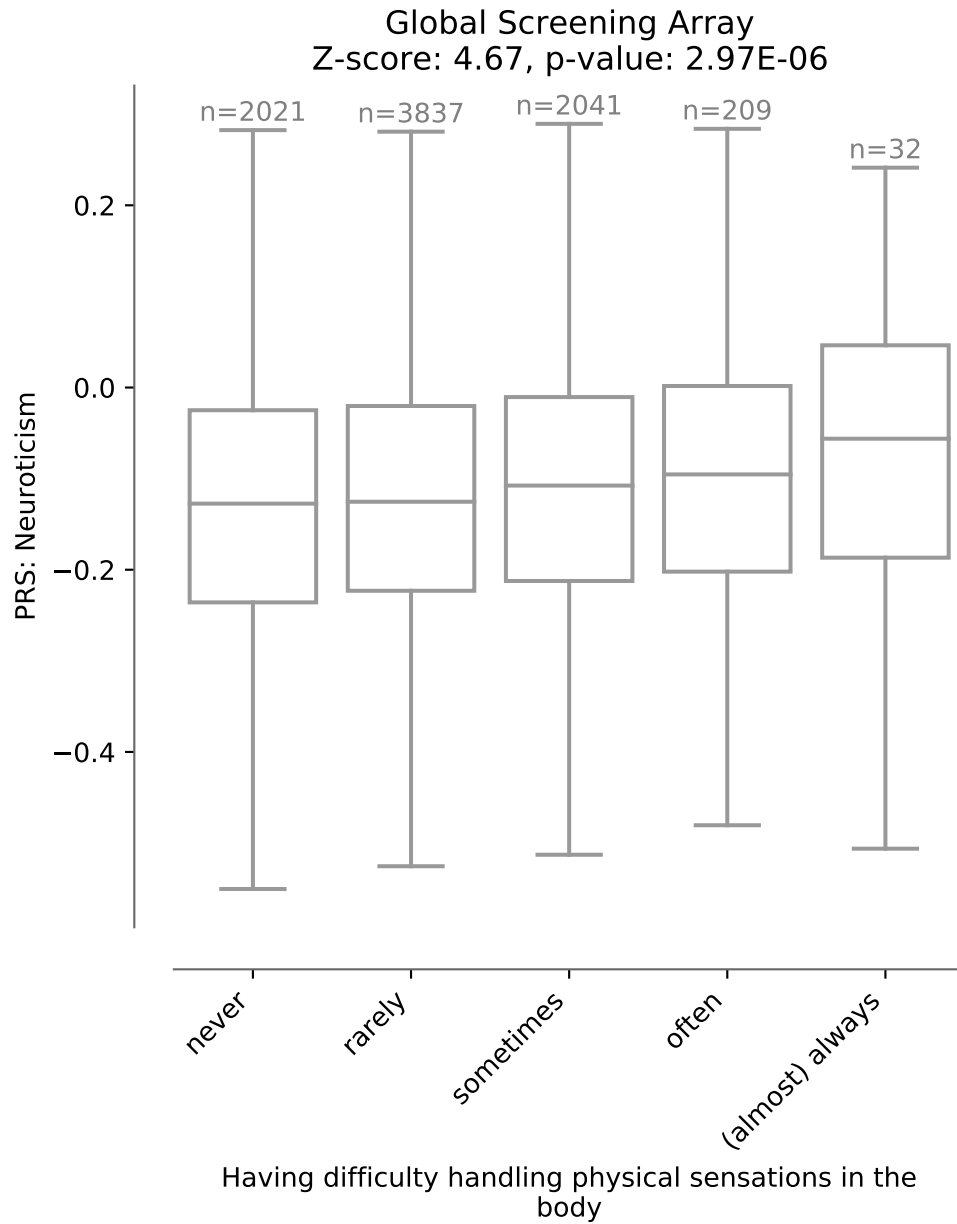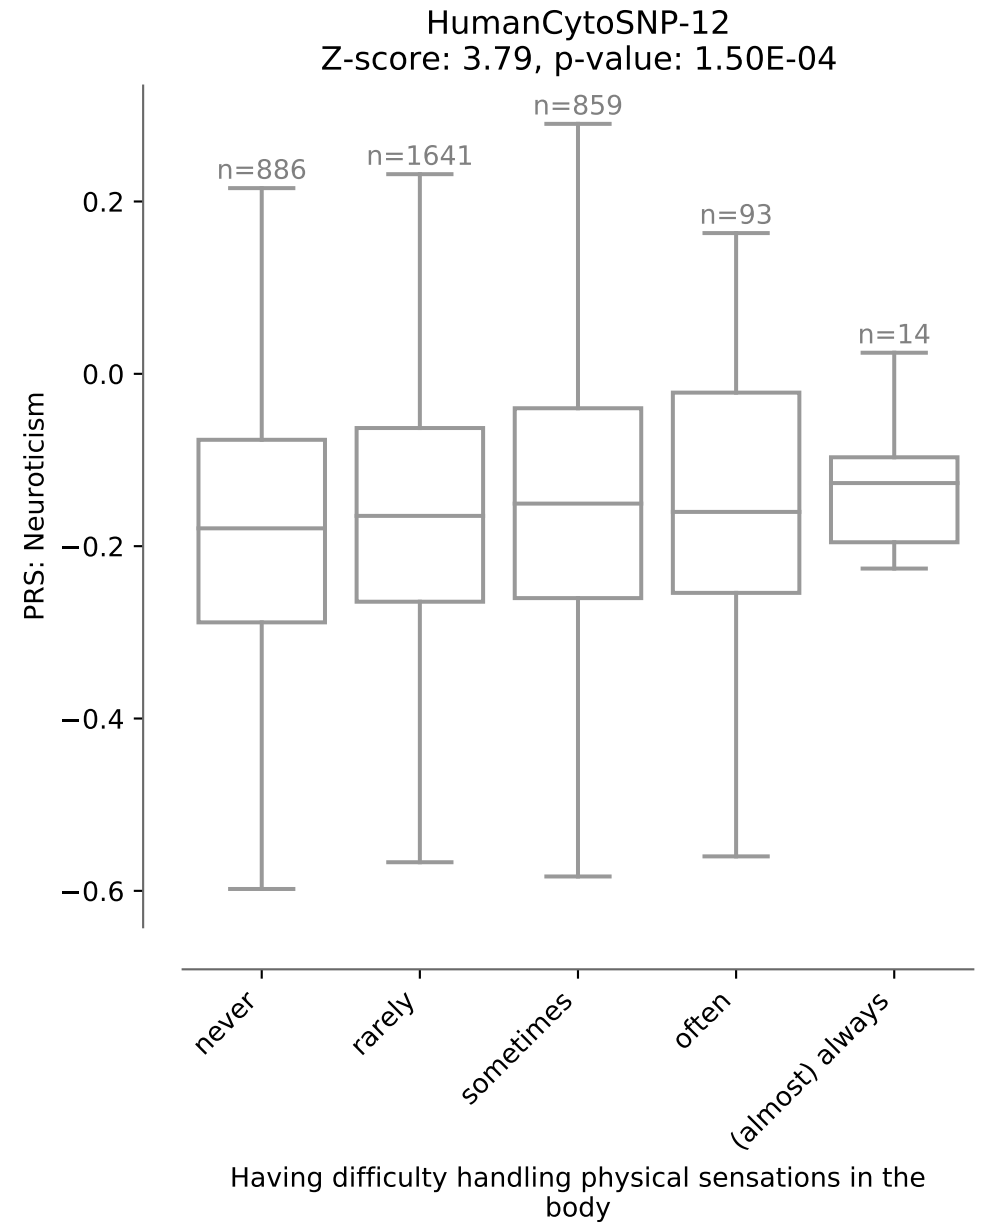

Having difficulty handling physical sensations in the body  
PGS: Worry/vulnerability  
Meta analysis Z-score: 6.87, p-value: 6.50E-12

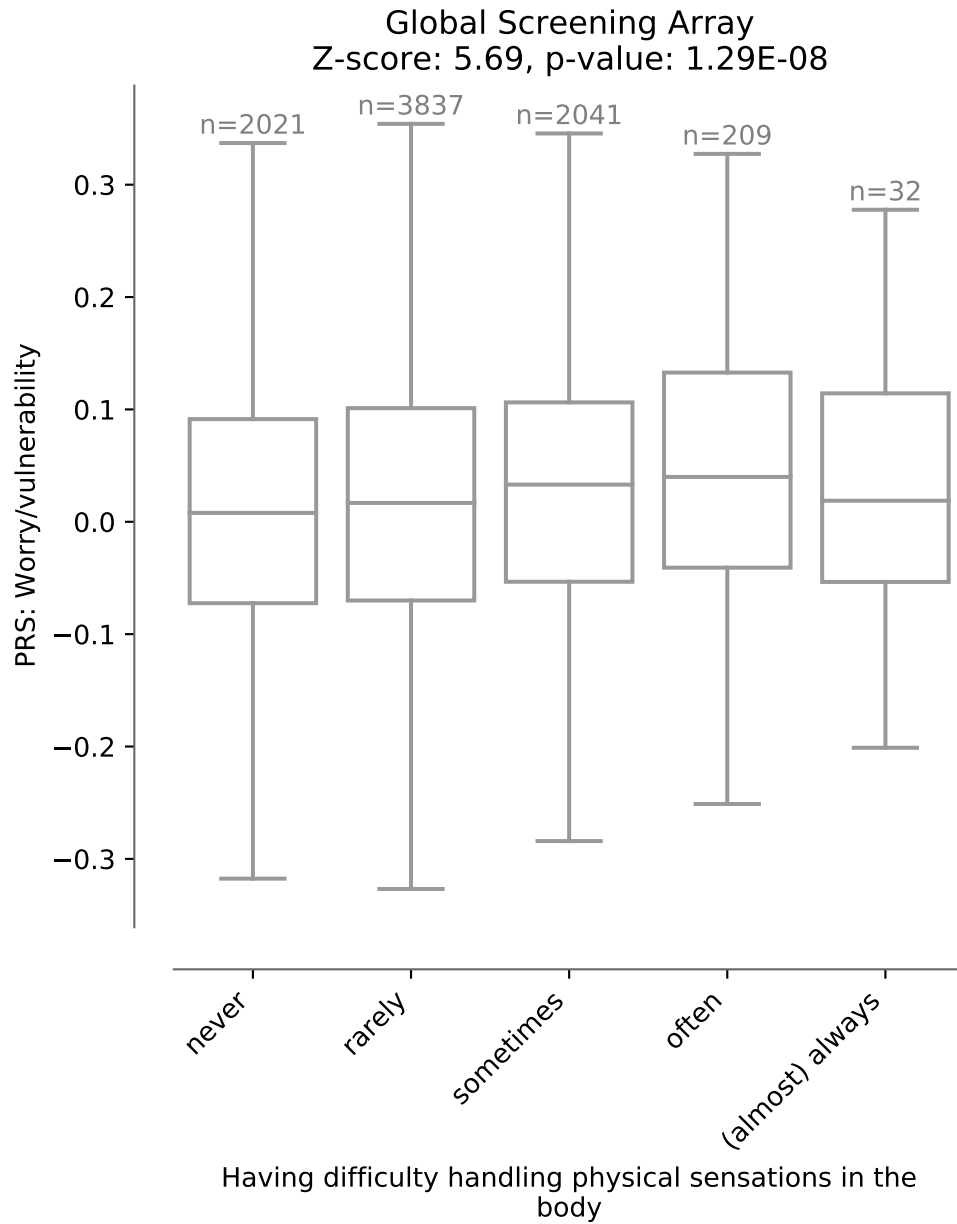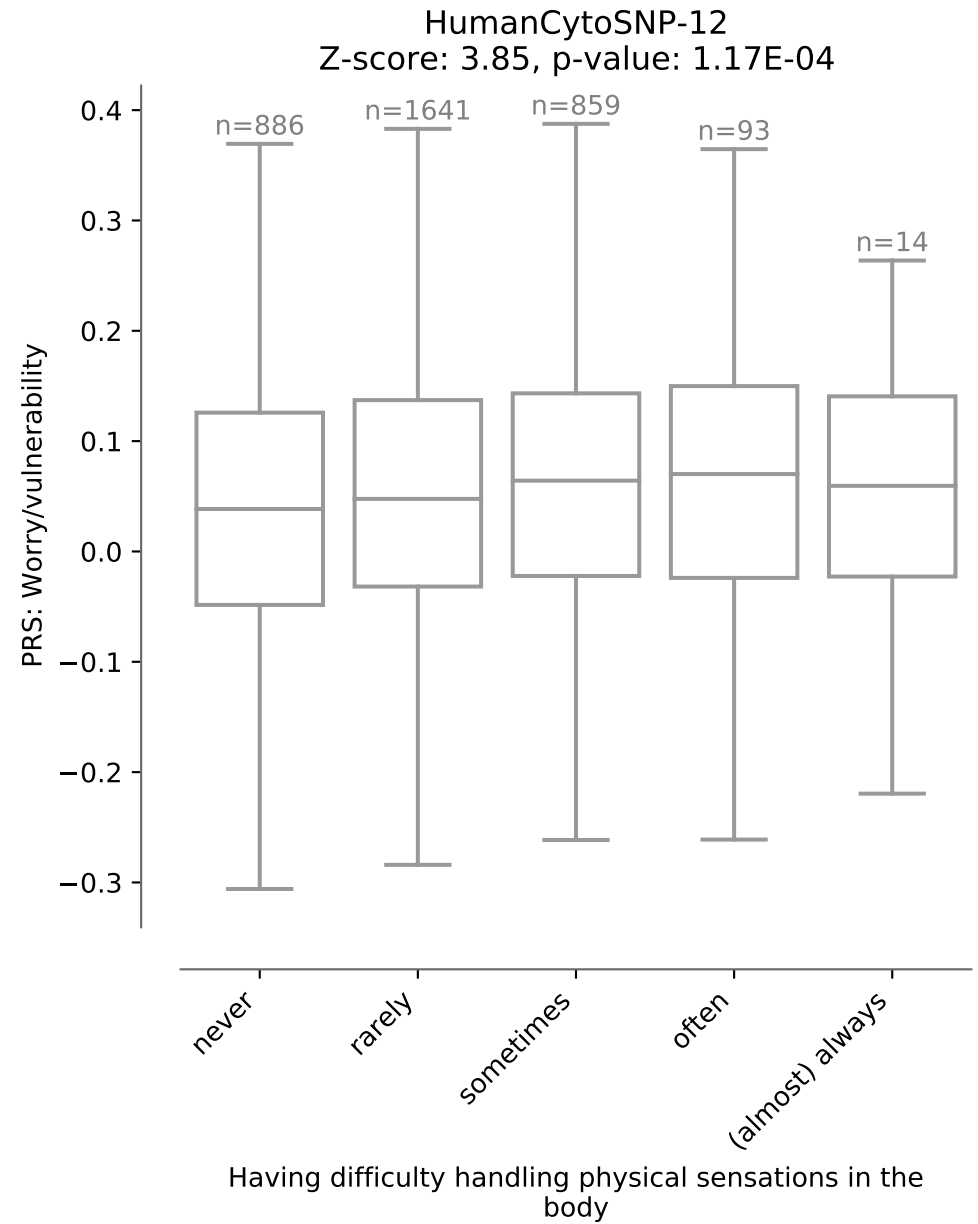

Worry when feeling some sensation in the body  
PGS: Anxiety/tension  
Meta analysis Z-score: 6.04, p-value: 1.58E-09

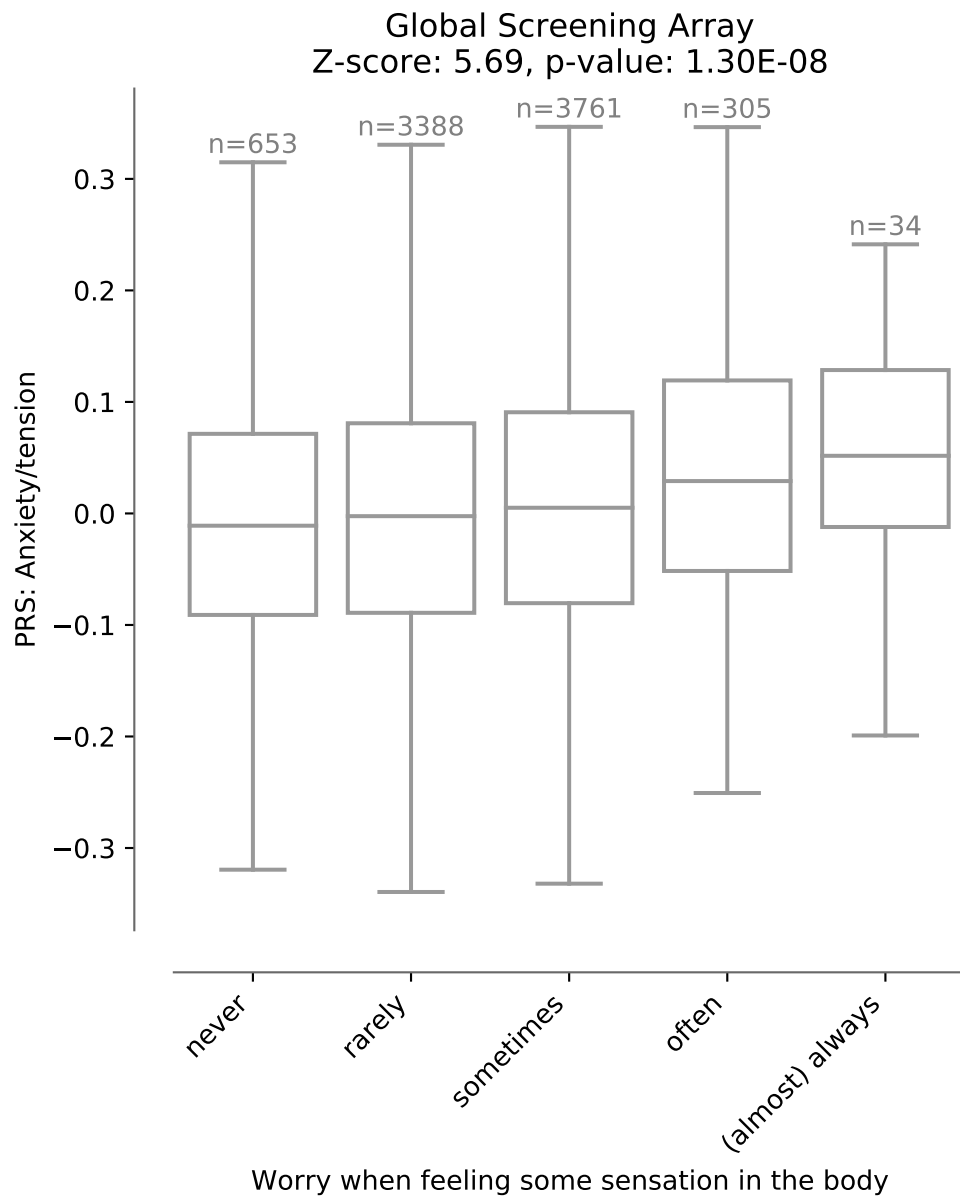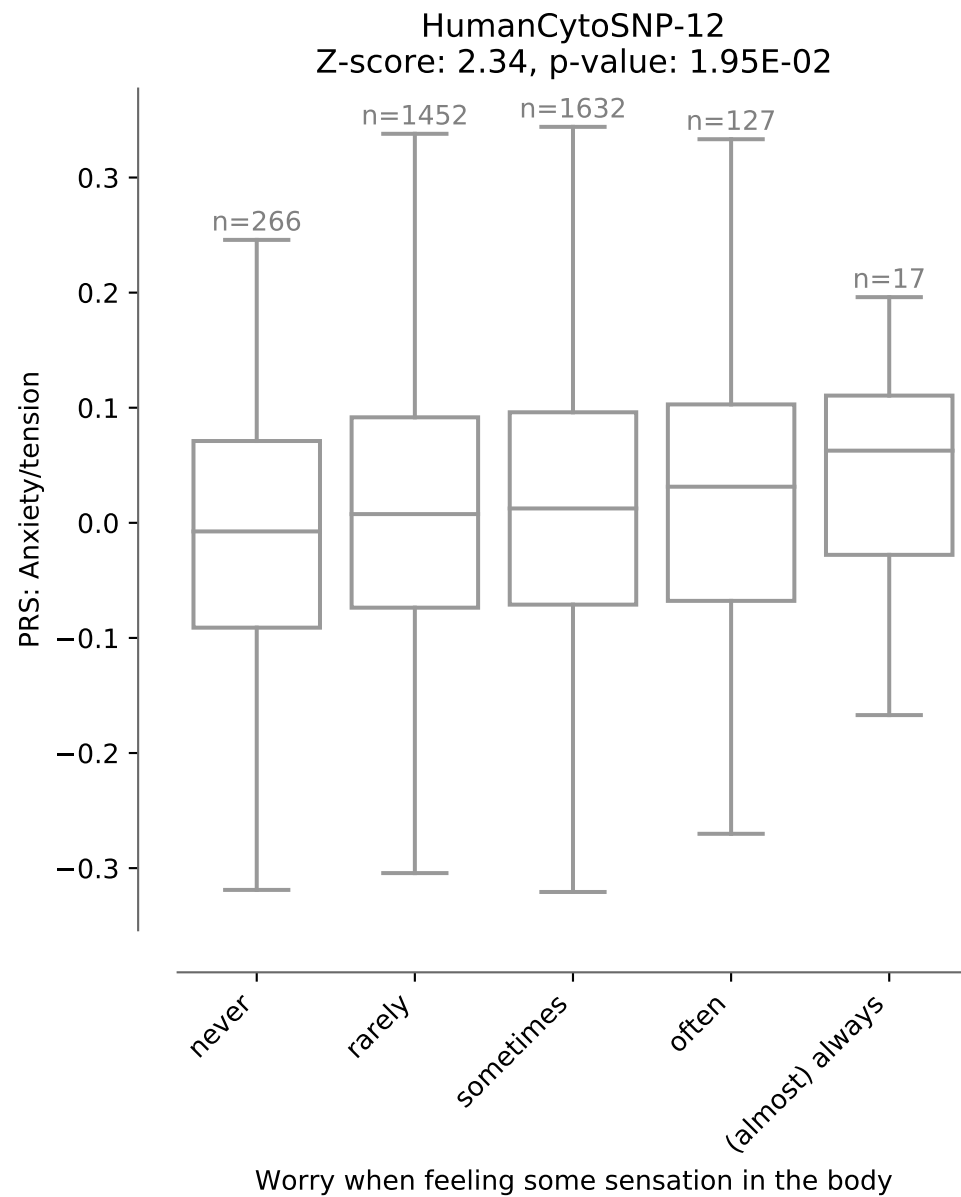

Worry when feeling some sensation in the body

PGS: BMI

Meta analysis Z-score: -4.57, p-value: 4.98E-06

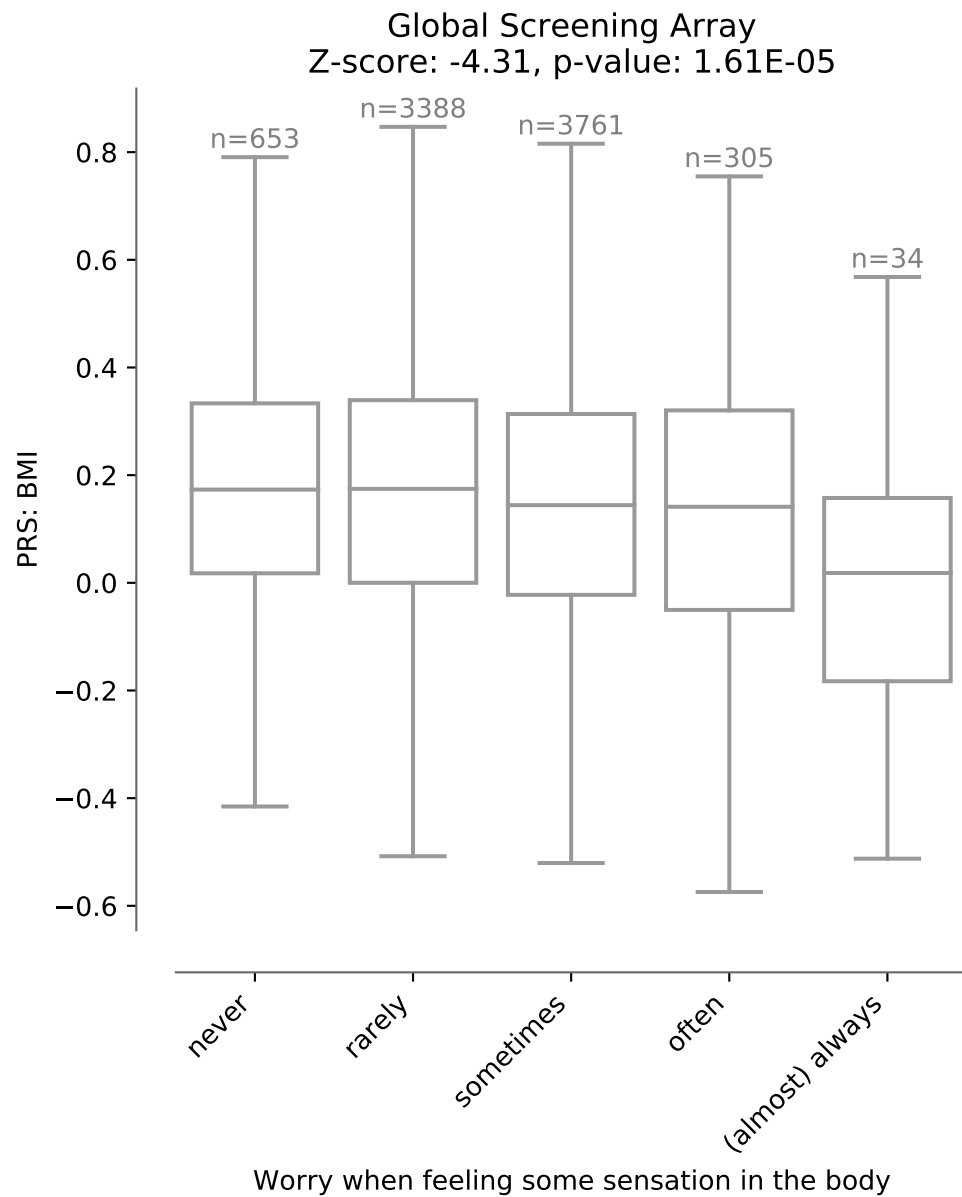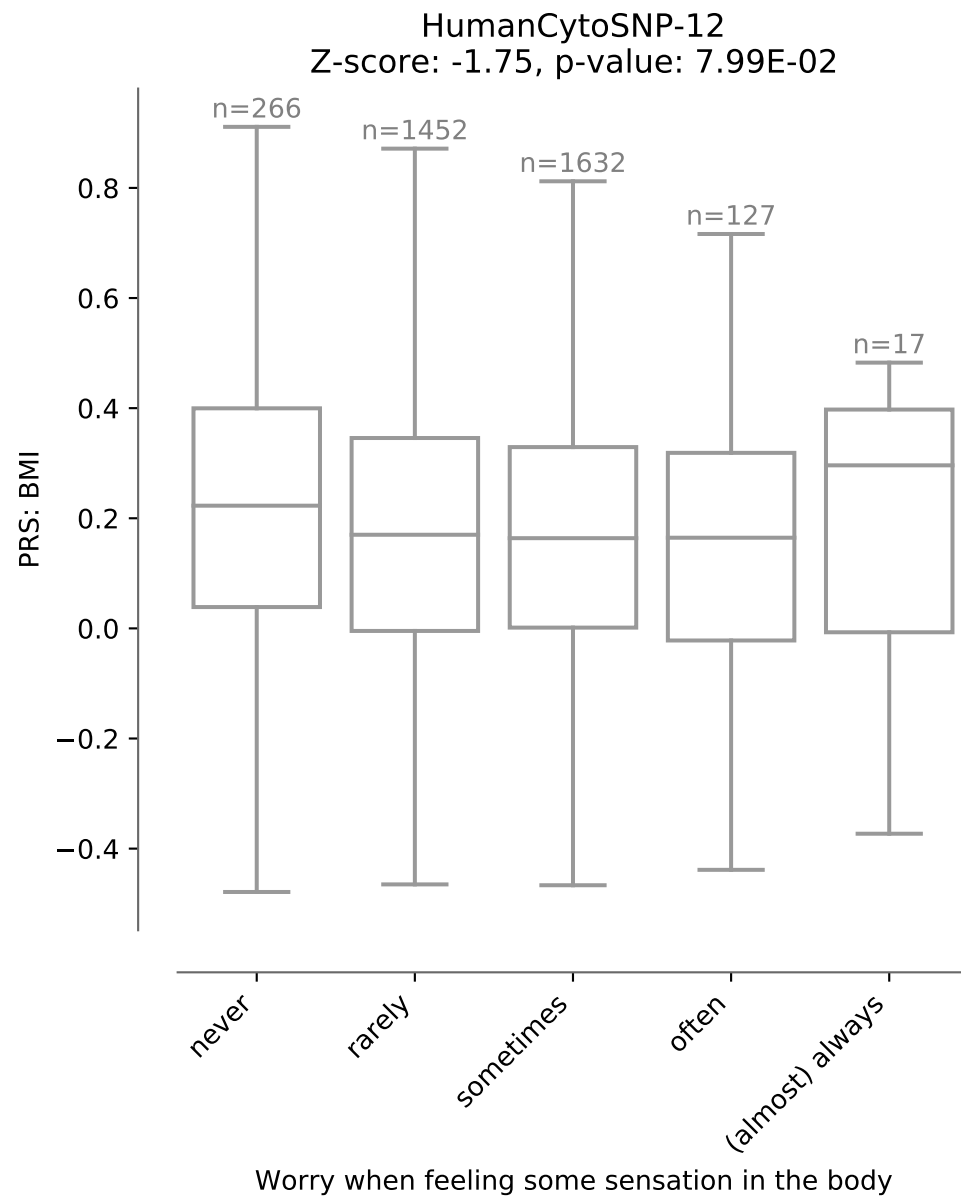

Worry when feeling some sensation in the body  
PGS: Life satisfaction  
Meta analysis Z-score: -6.06, p-value: 1.39E-09

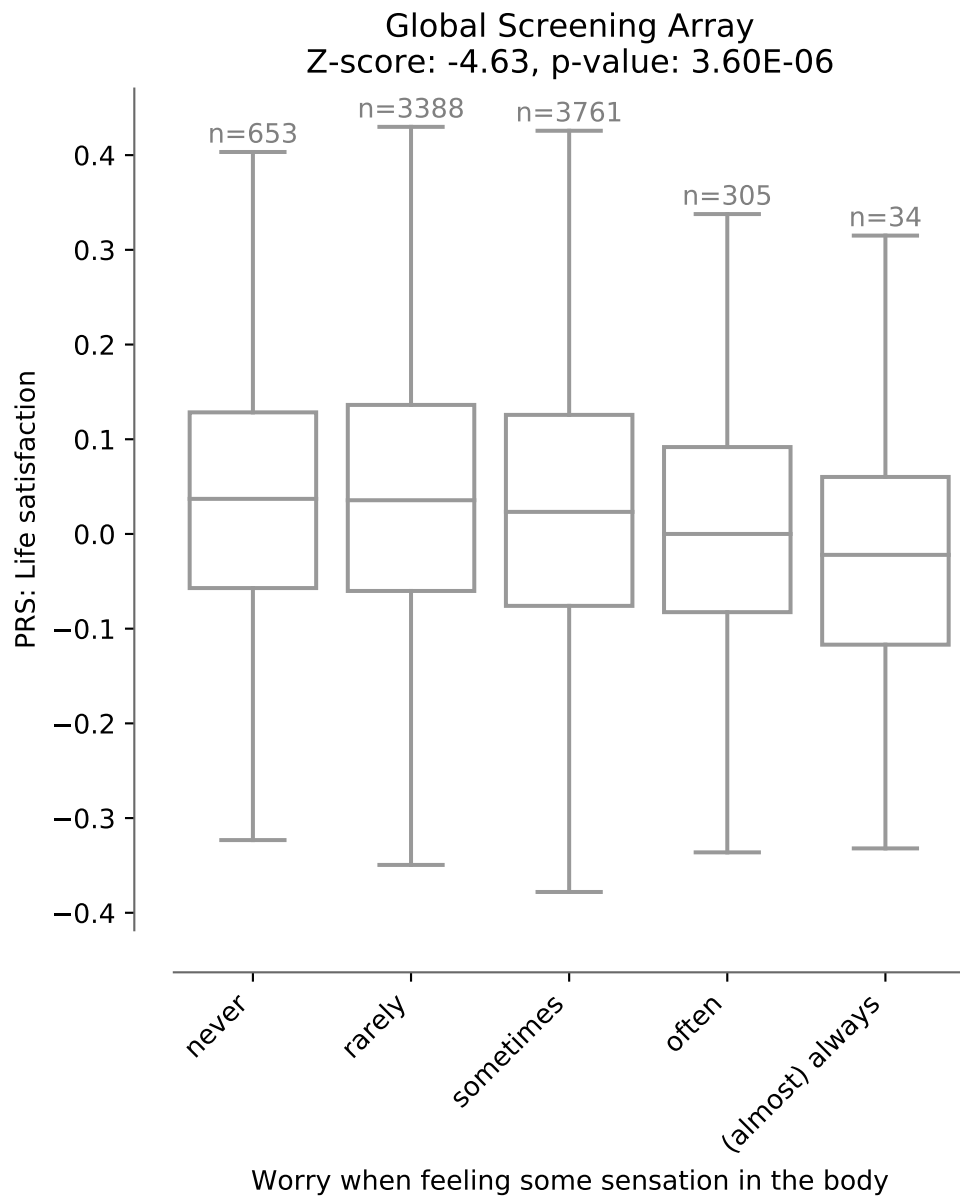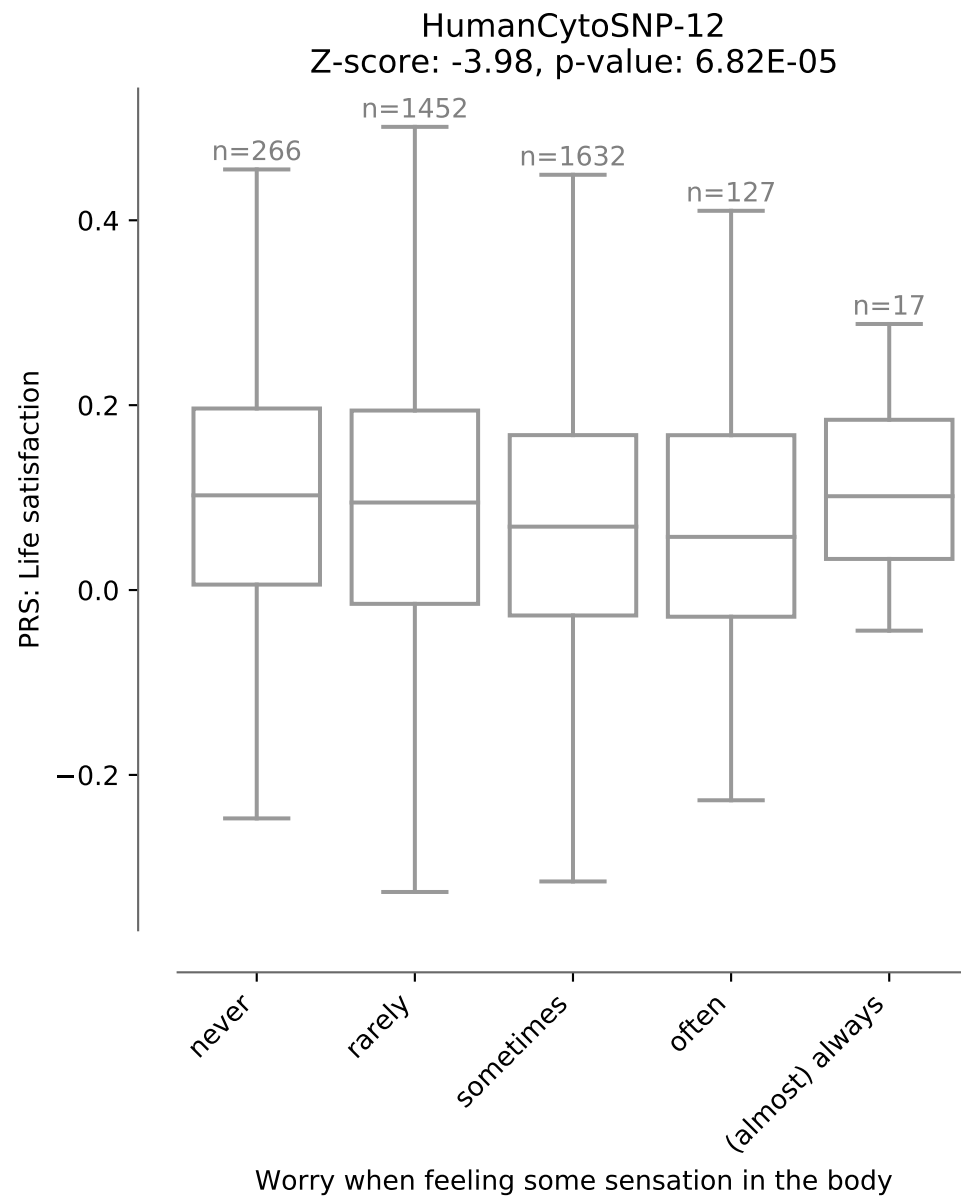

Worry when feeling some sensation in the body  
PGS: Neuroticism  
Meta analysis Z-score: 7.71, p-value: 1.26E-14

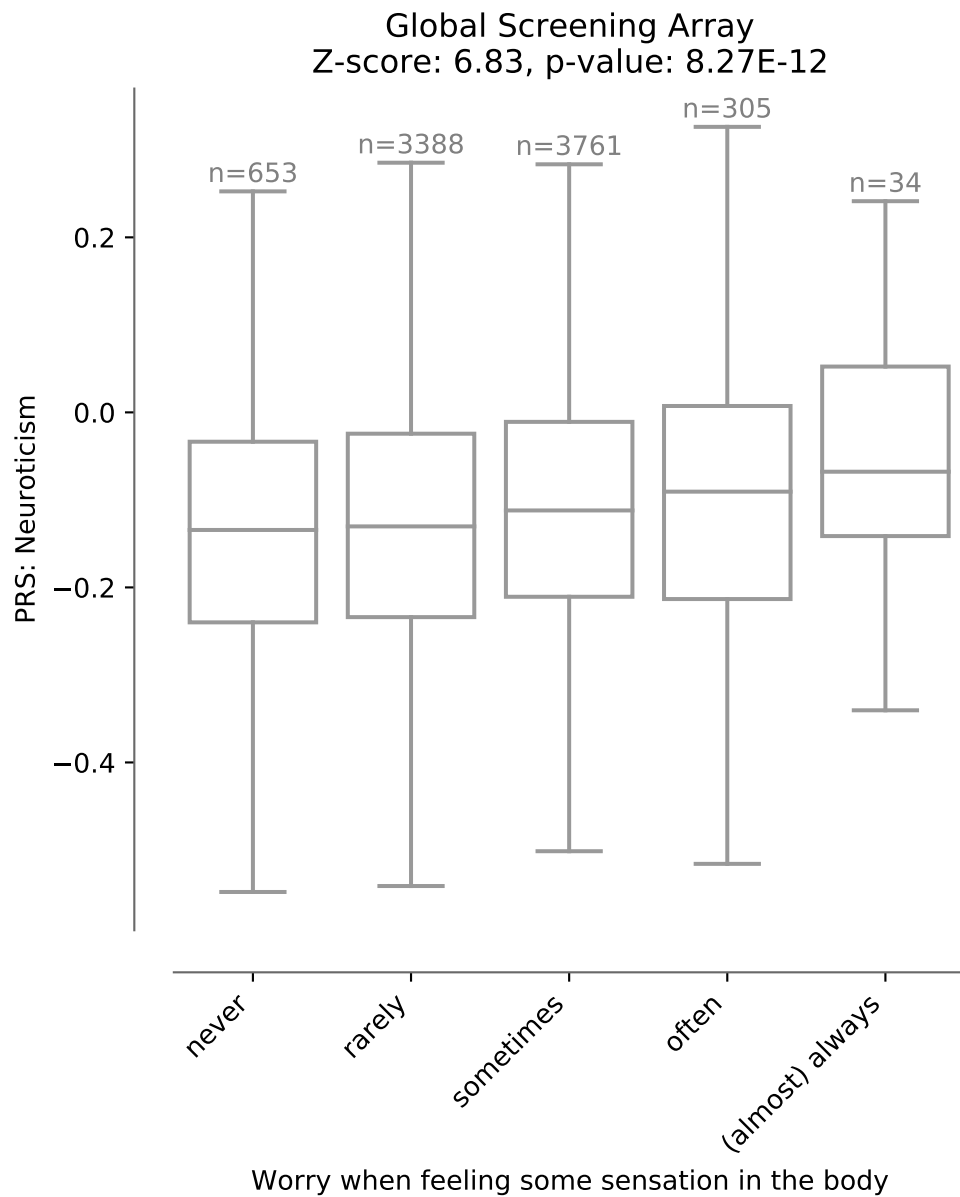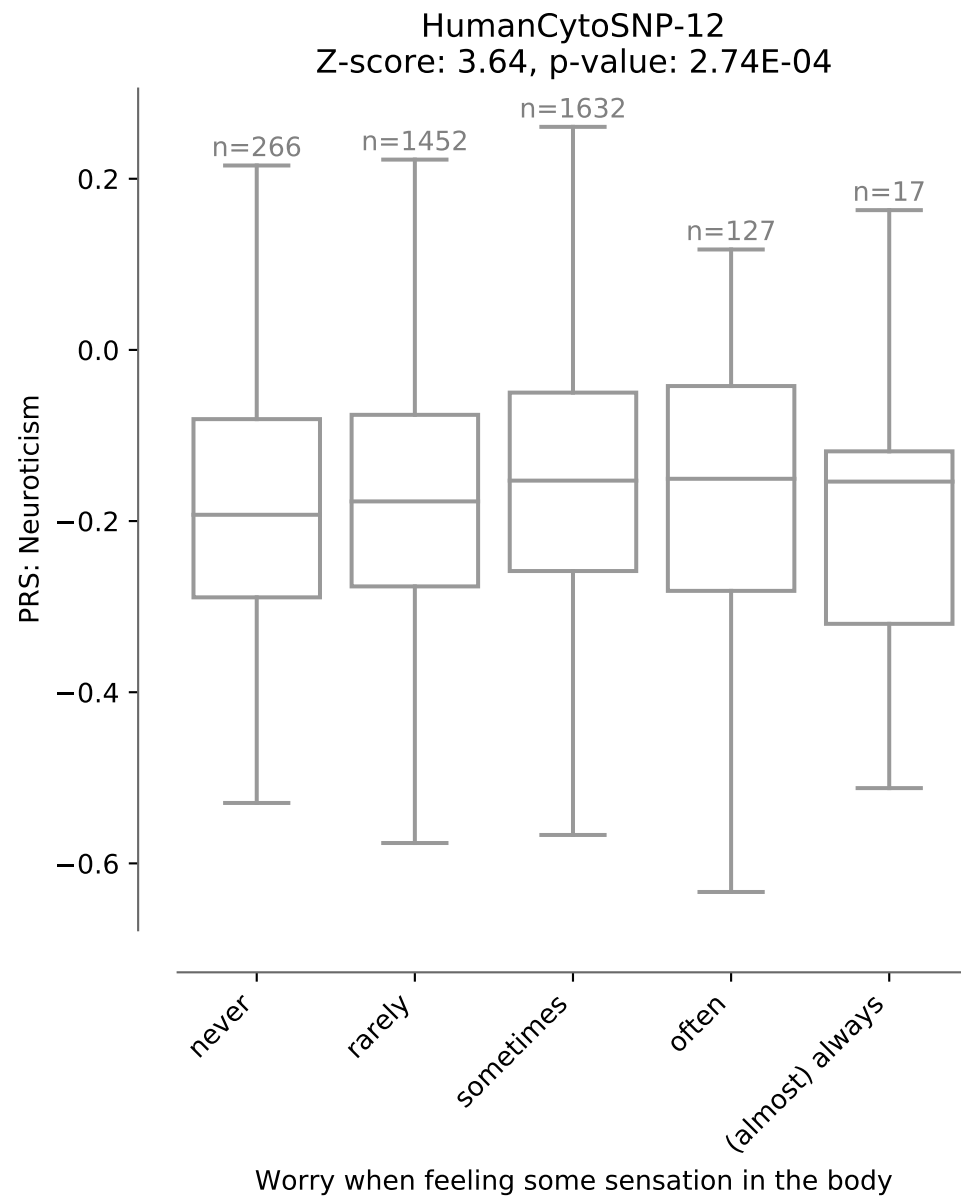

Worry when feeling some sensation in the body  
PGS: Worry/vulnerability  
Meta analysis Z-score: 7.78, p-value: 7.10E-15

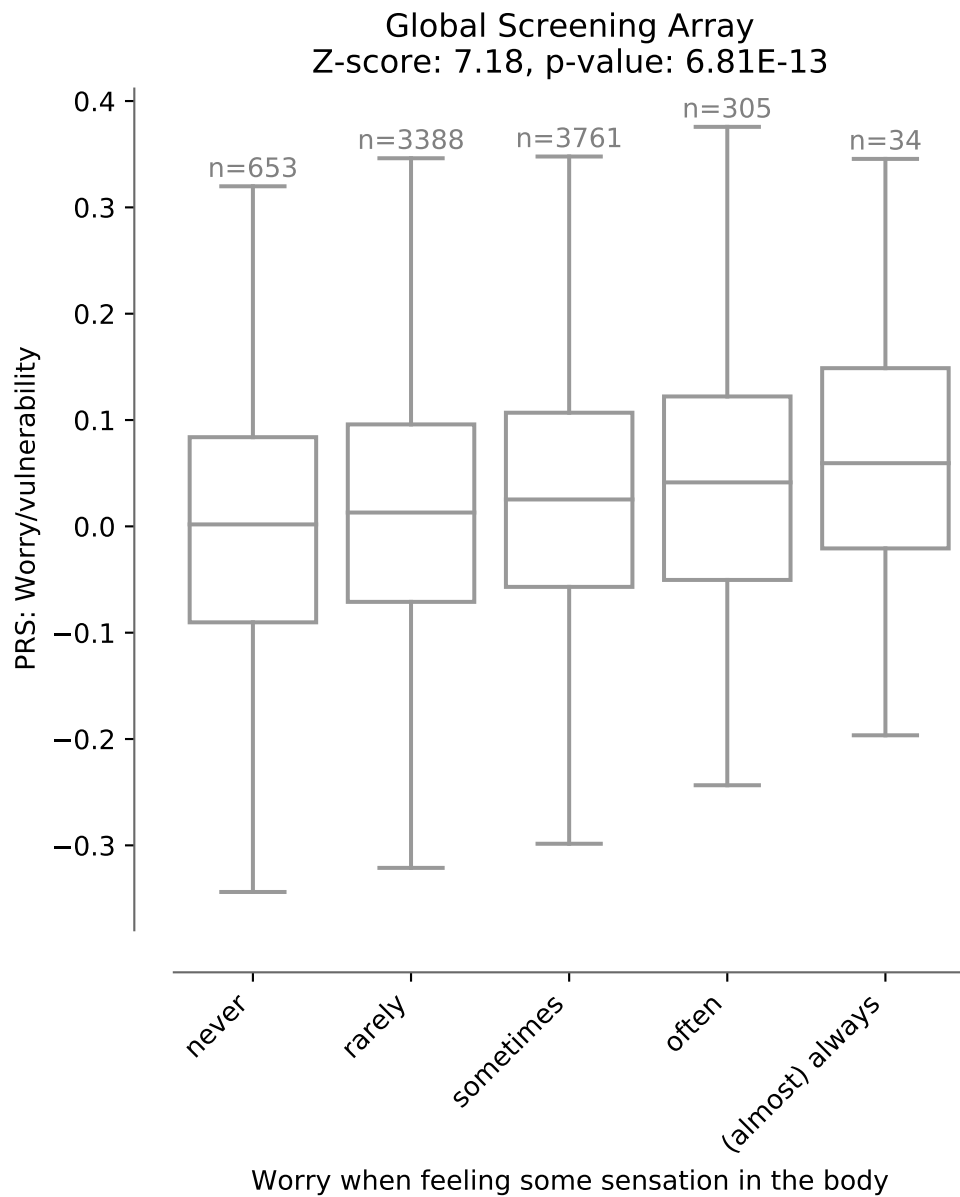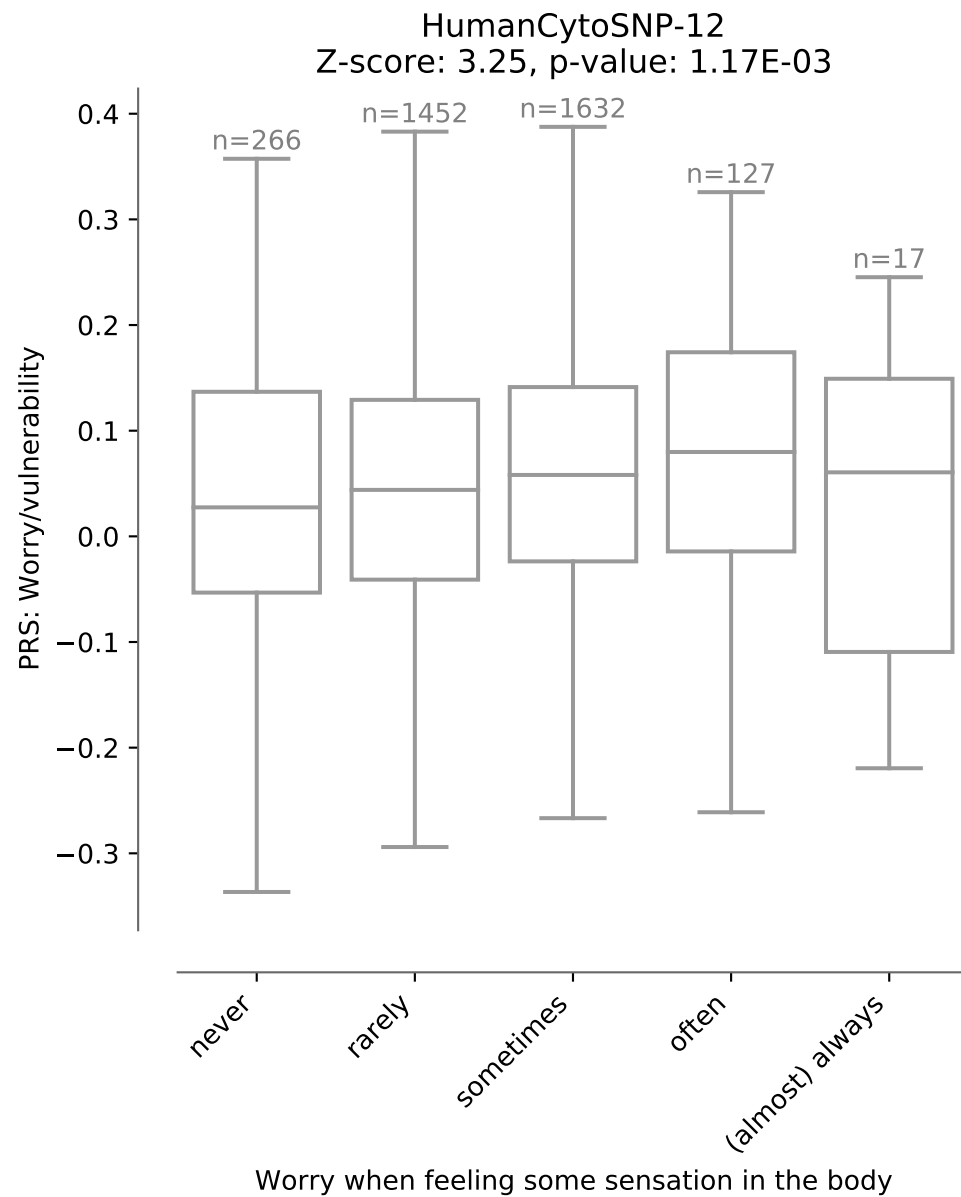



Experiencing symptoms after reading or hearing about an illness

PGS: Neuroticism

Meta analysis Z-score: 5.76, p-value: 8.33E-09

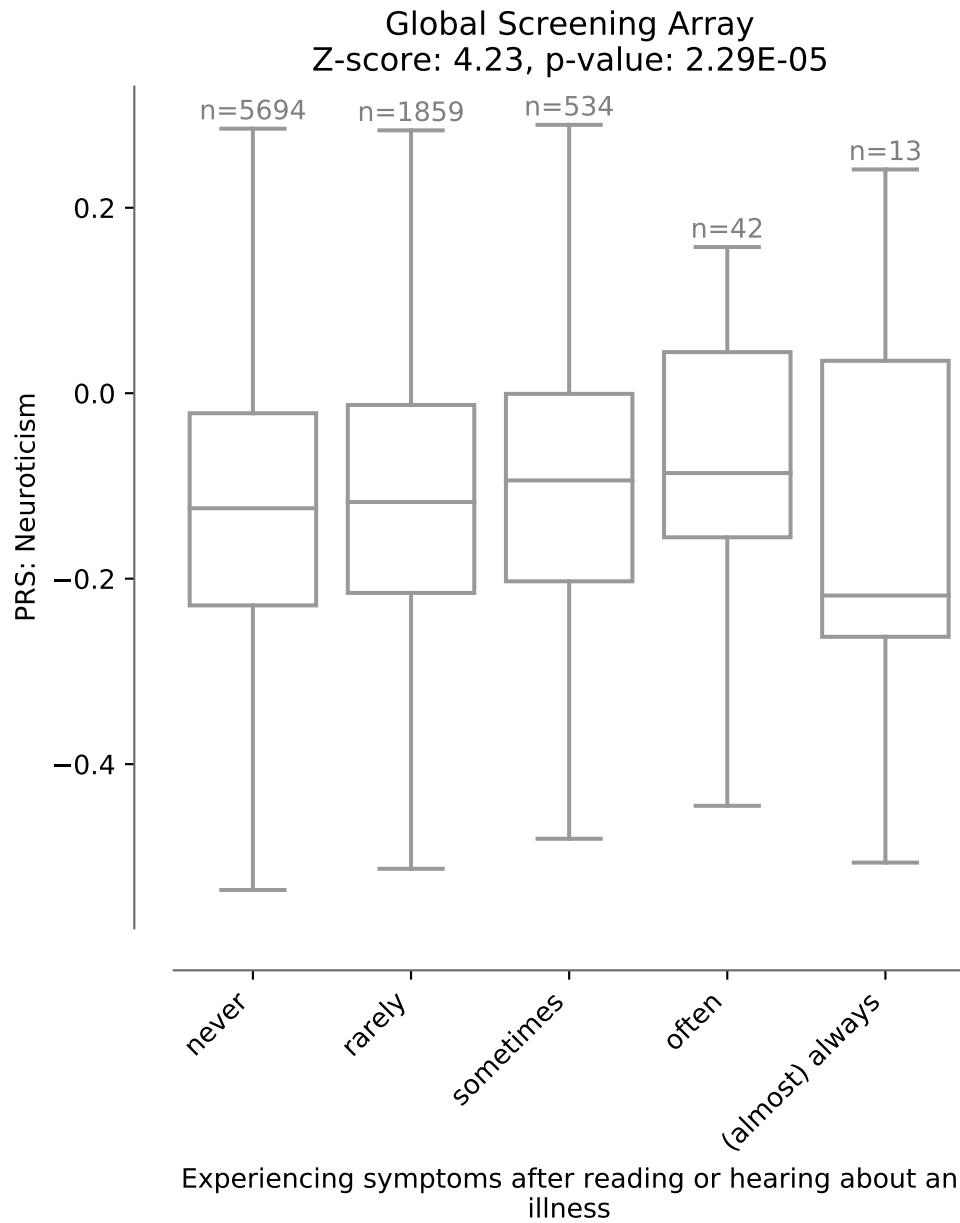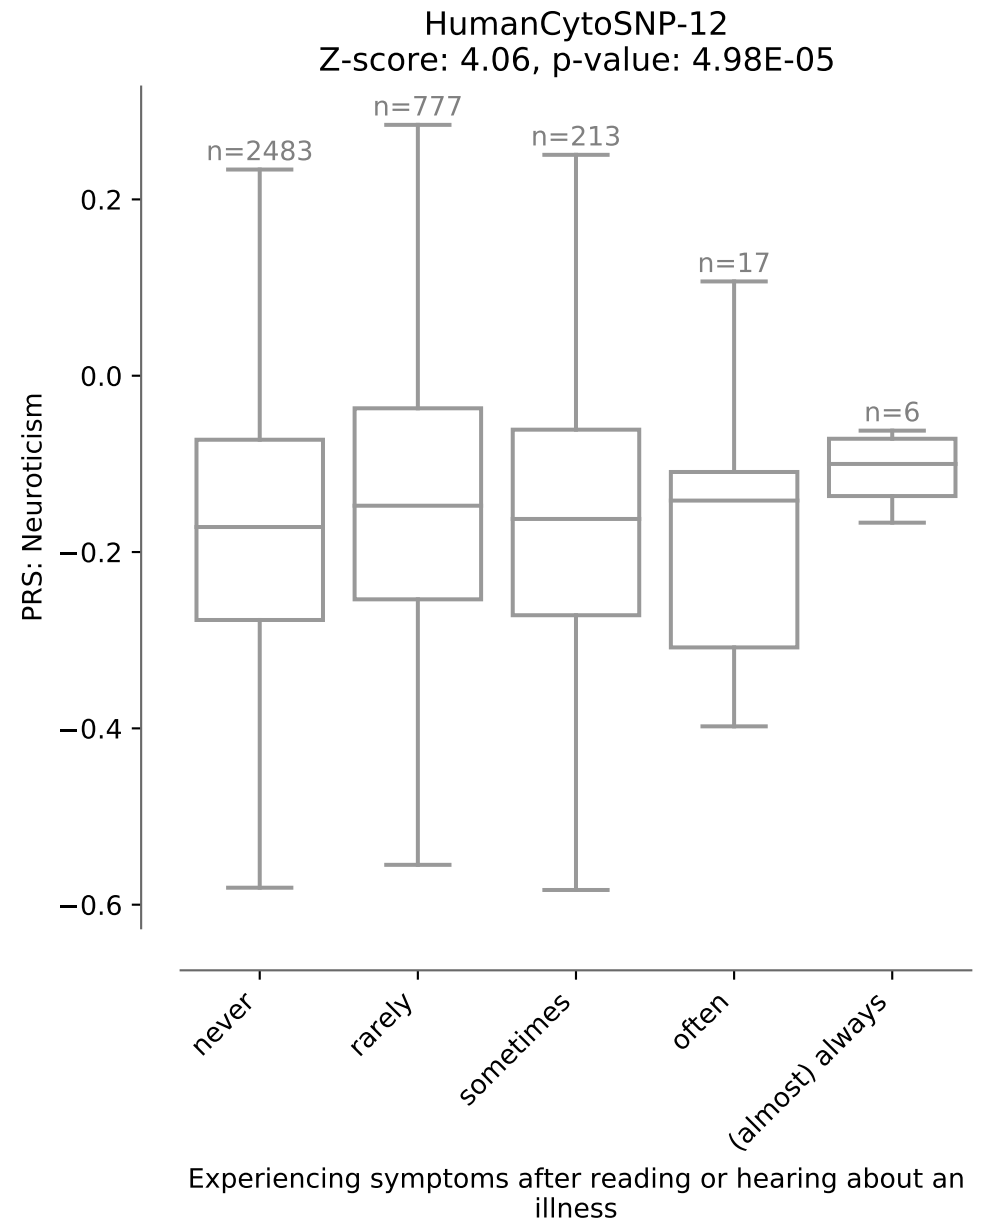

Experiencing symptoms after reading or hearing about an illness  
PGS: Worry/vulnerability  
Meta analysis Z-score: 5.57, p-value: 2.62E-08

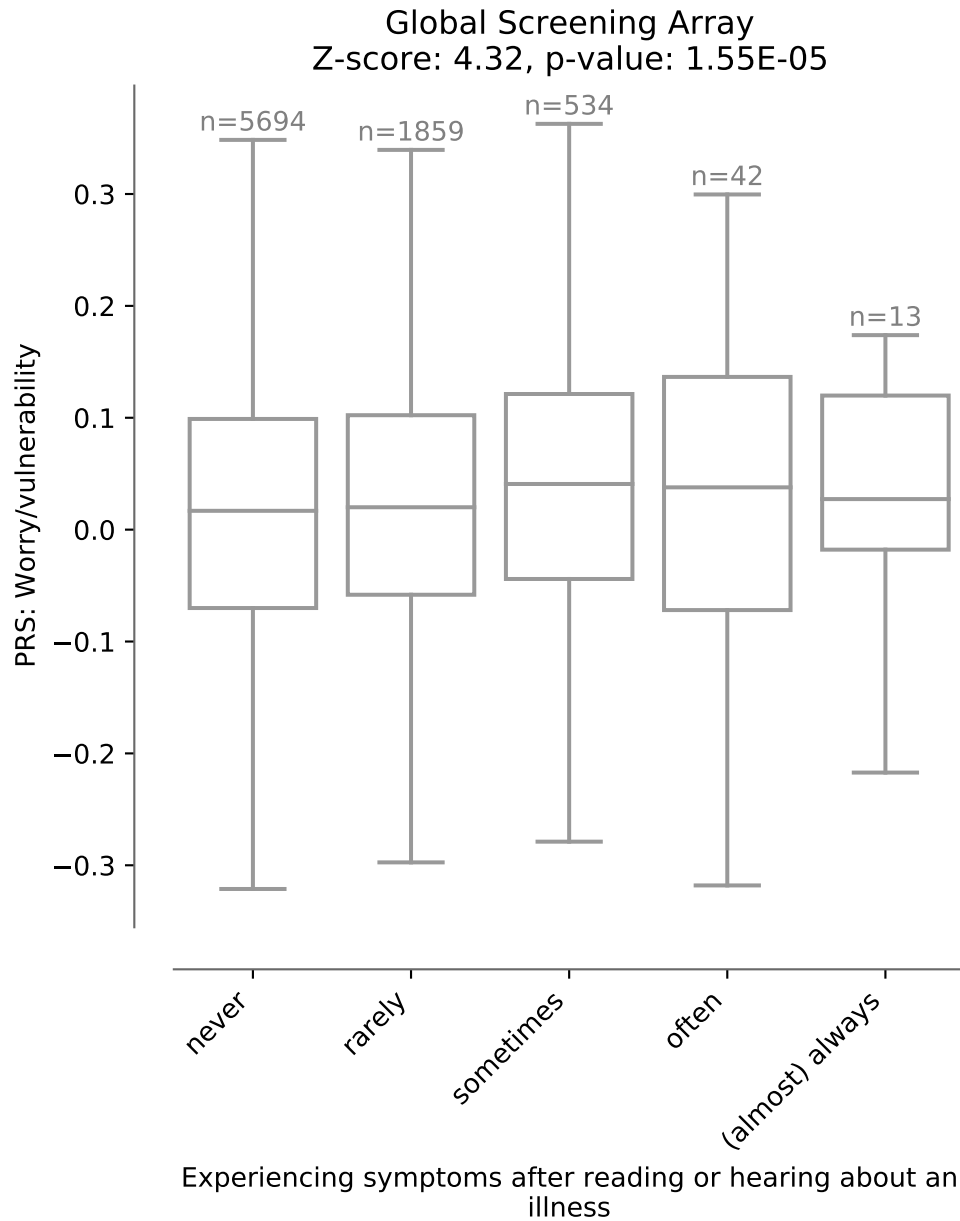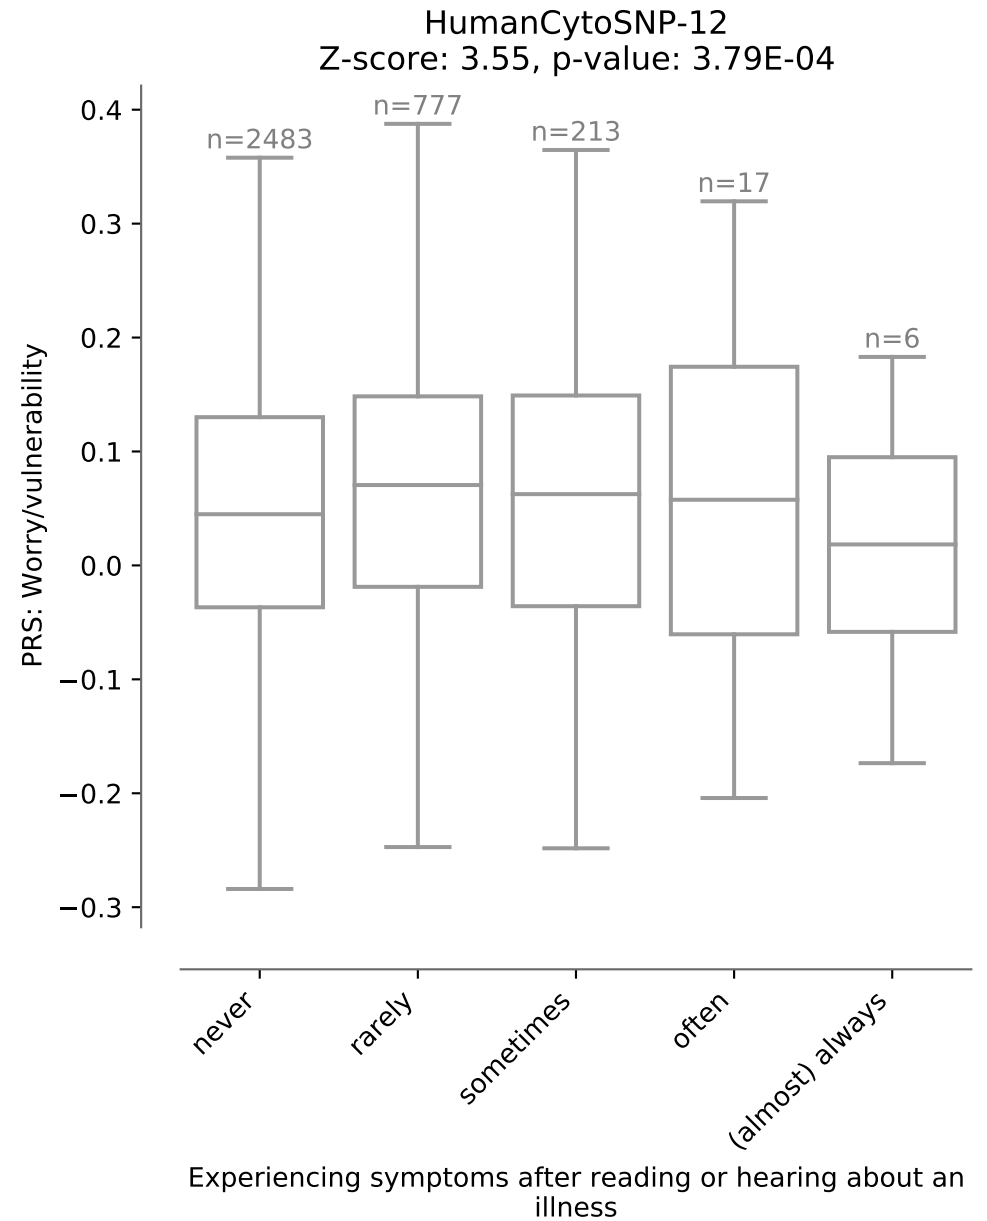

Do you think you ever had a COVID-19 infection  
PGS: Schizophrenia  
Meta analysis Z-score: 4.47, p-value: 7.84E-06

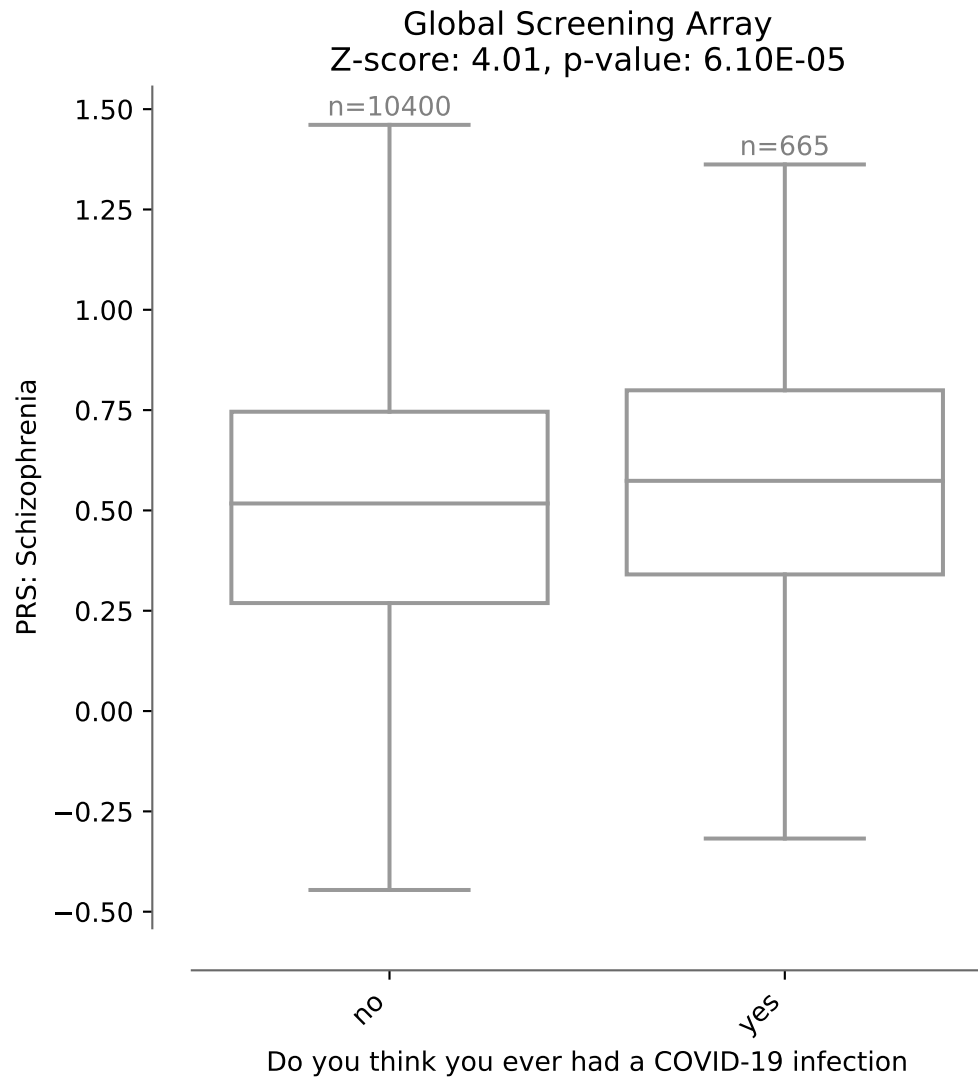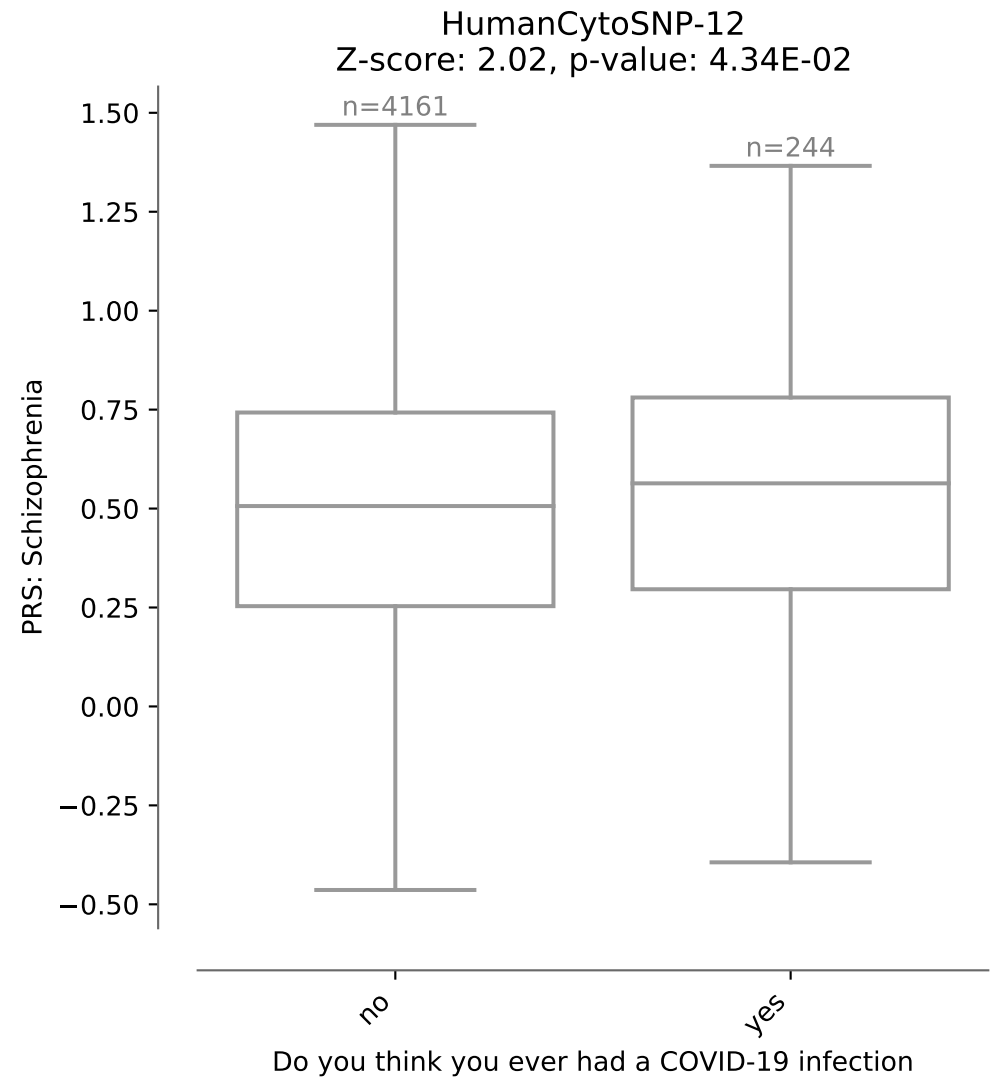

Felt afraid  
PGS: Depression  
Meta analysis Z-score: 5.58, p-value: 2.43E-08

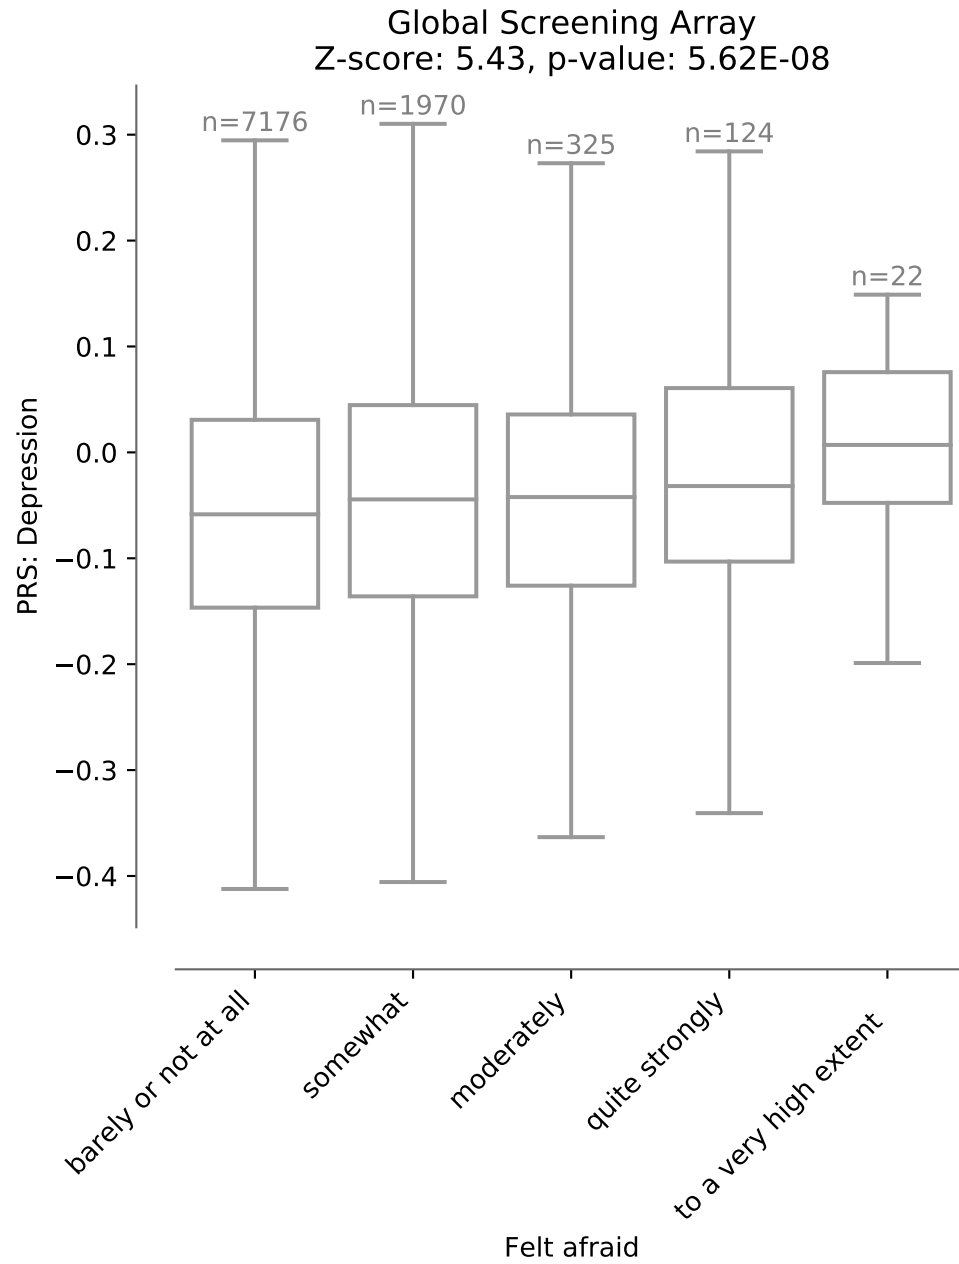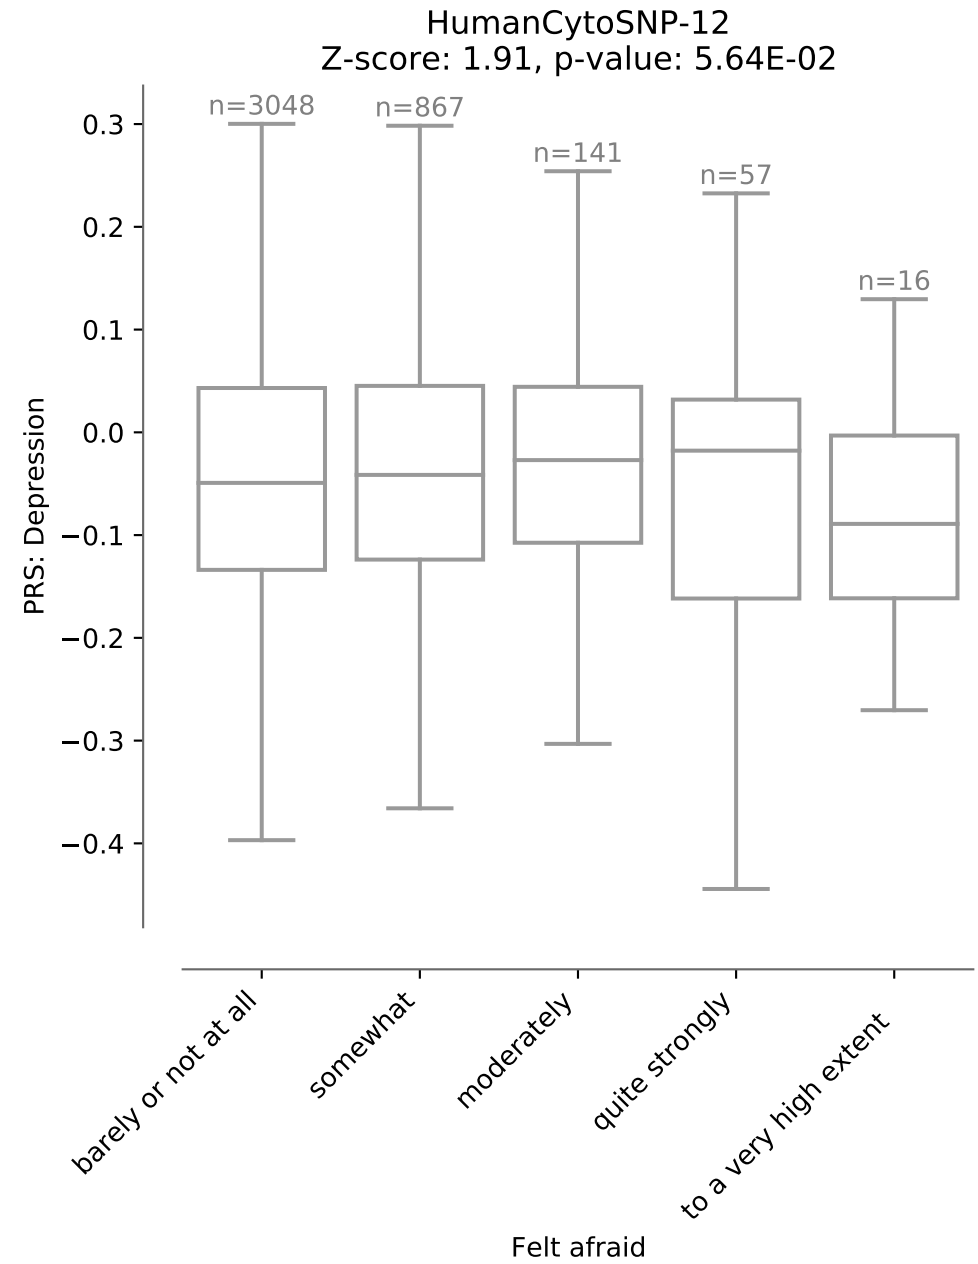

Felt afraid  
PGS: Life satisfaction  
Meta analysis Z-score: -7.95, p-value: 1.87E-15

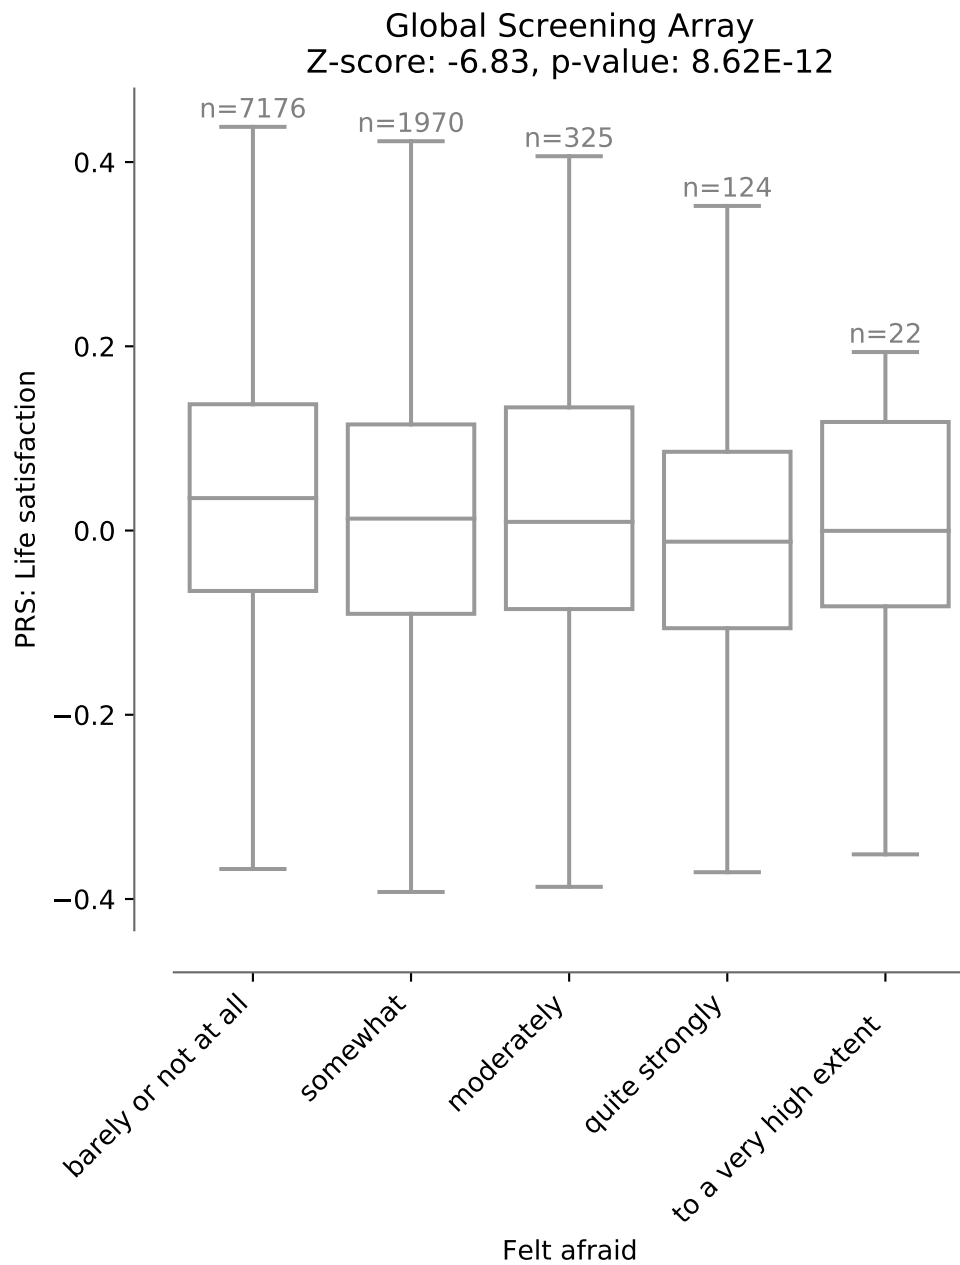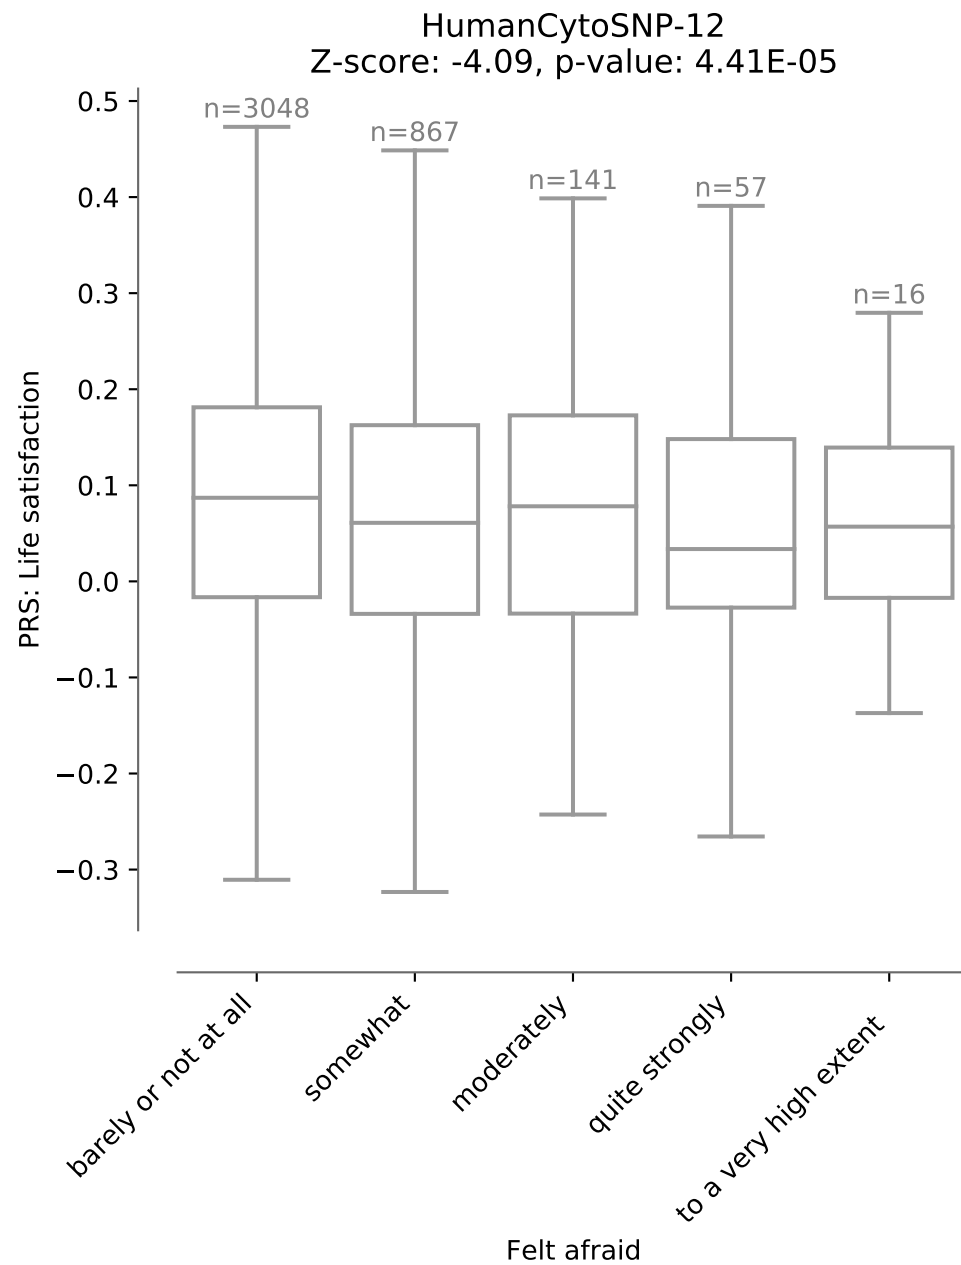

Felt afraid  
PGS: Neuroticism  
Meta analysis Z-score: 8.75, p-value: 2.06E-18

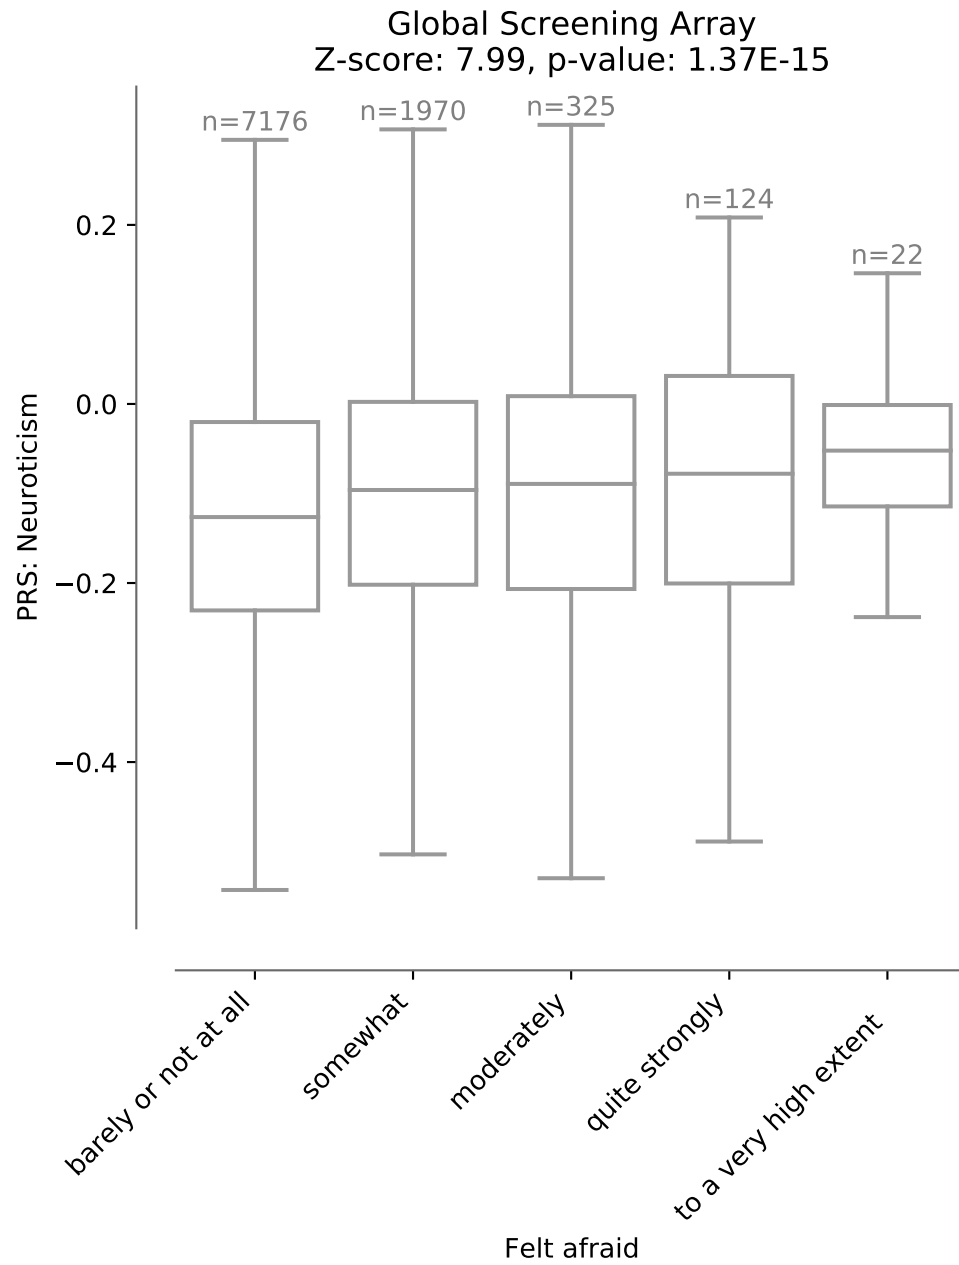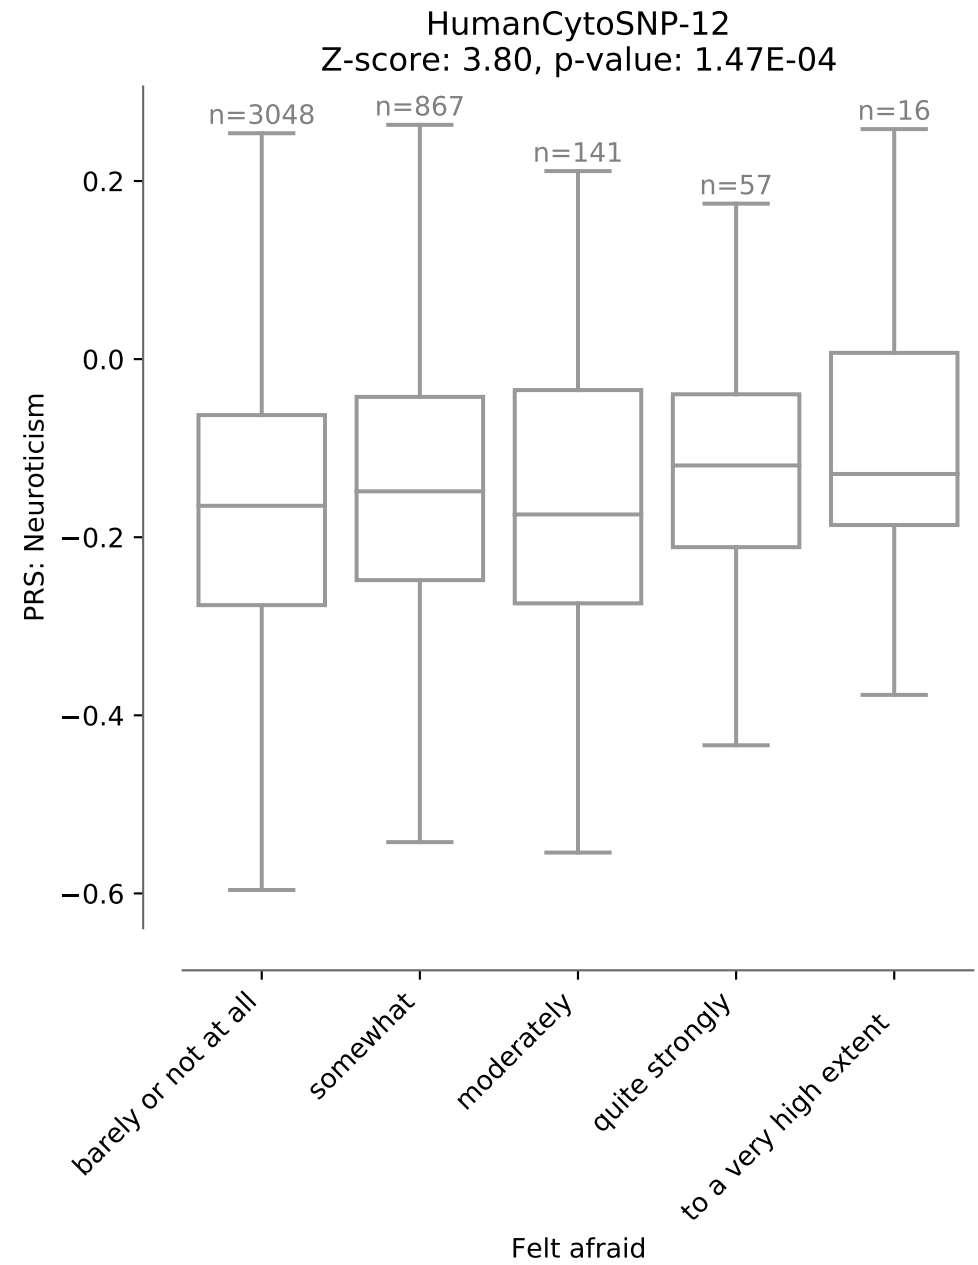

Felt afraid  
PGS: Schizophrenia  
Meta analysis Z-score: 4.71, p-value: 2.49E-06

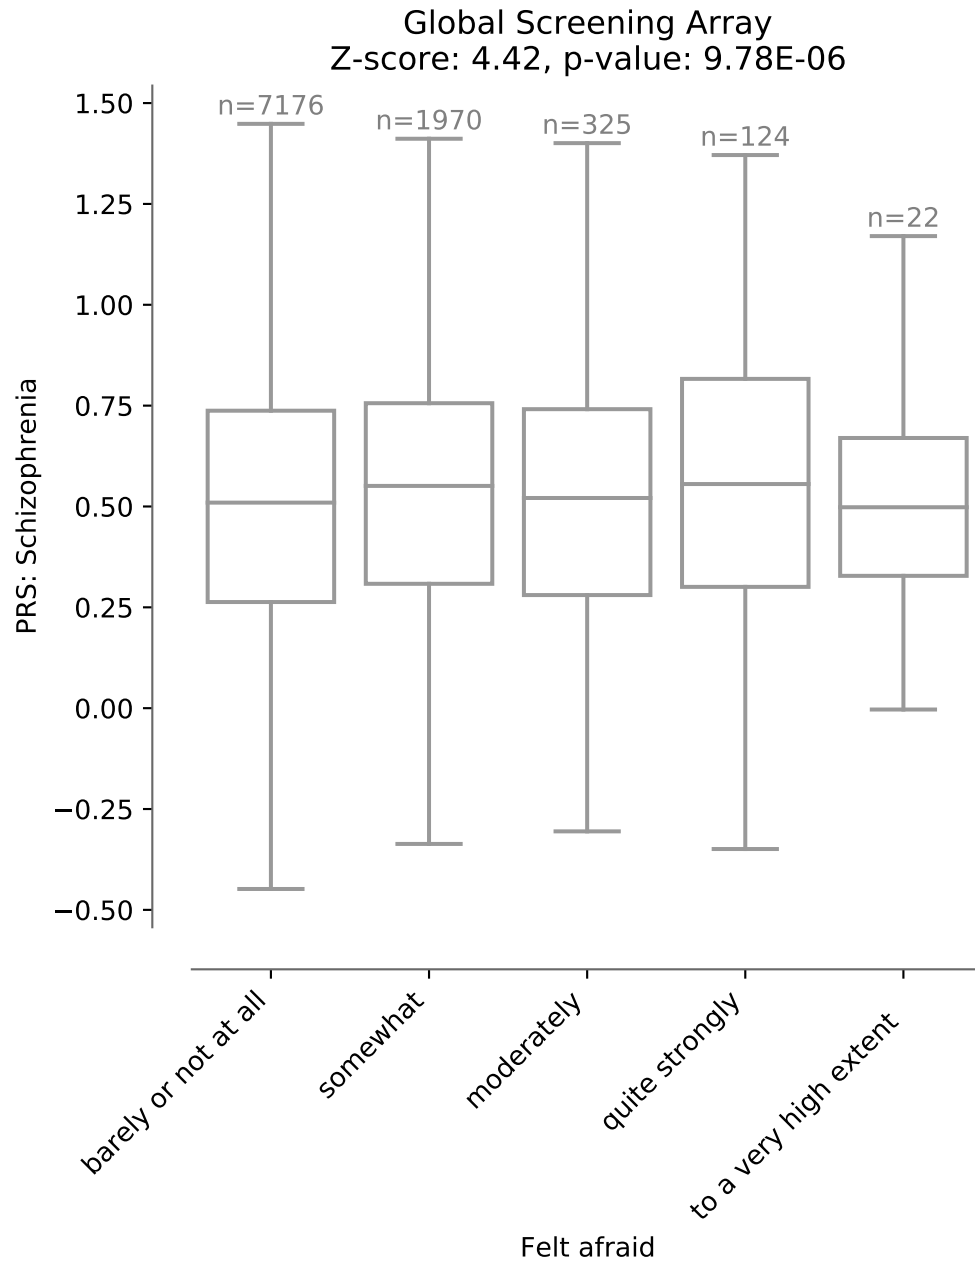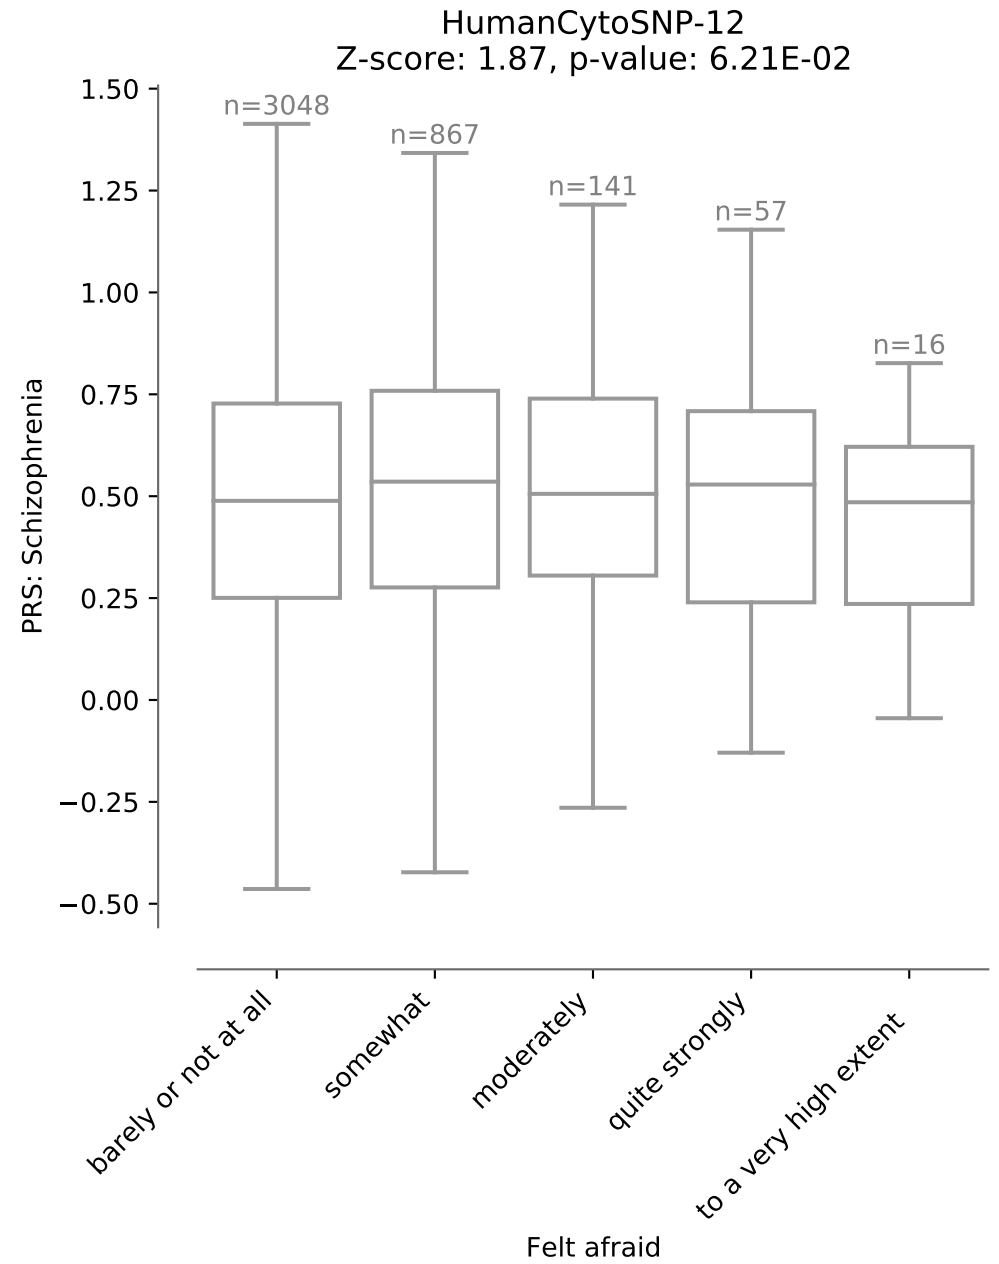

Felt afraid  
PGS: Worry/vulnerability  
Meta analysis Z-score: 6.52, p-value: 6.92E-11

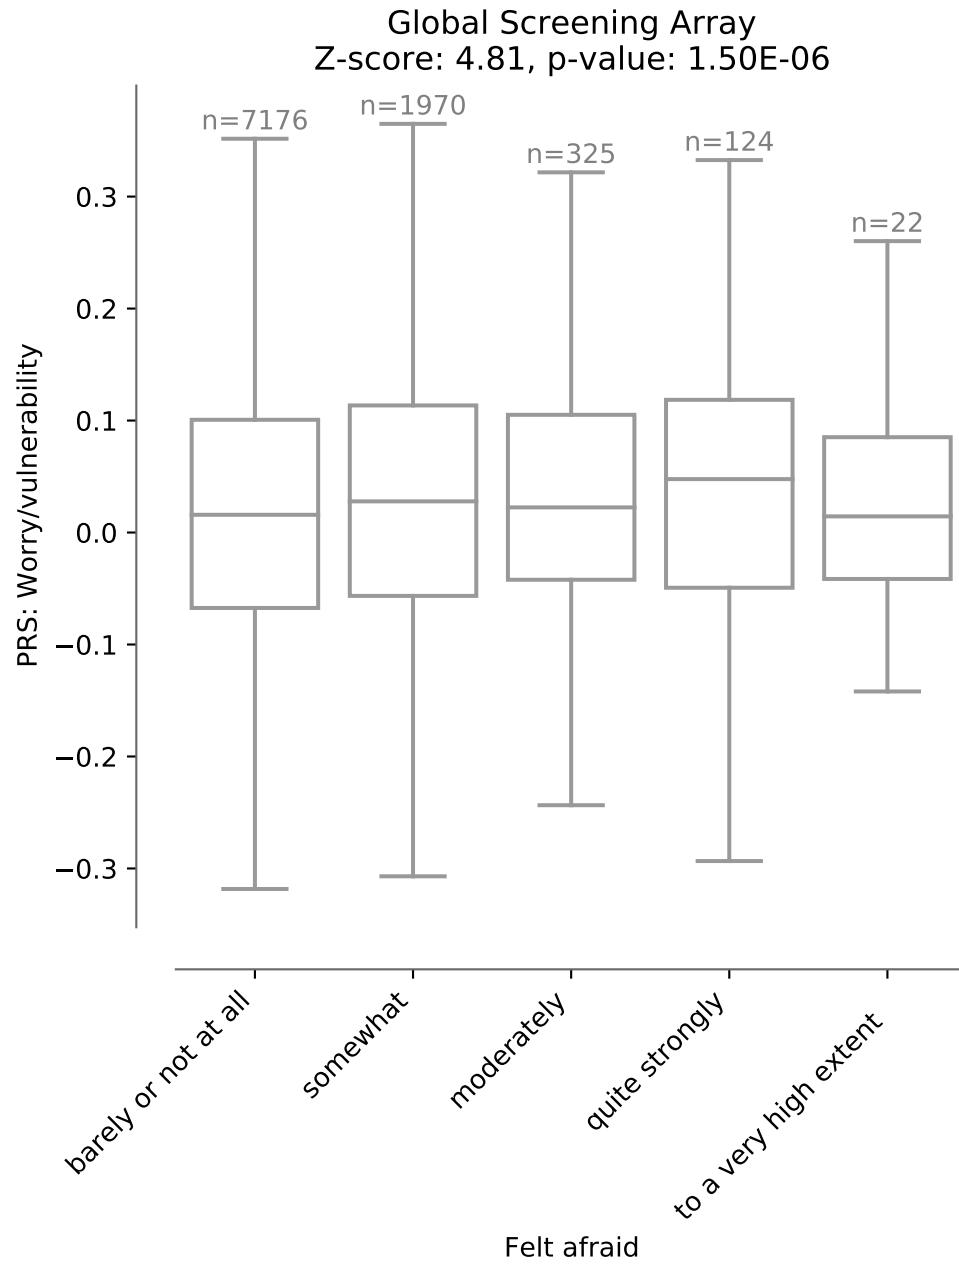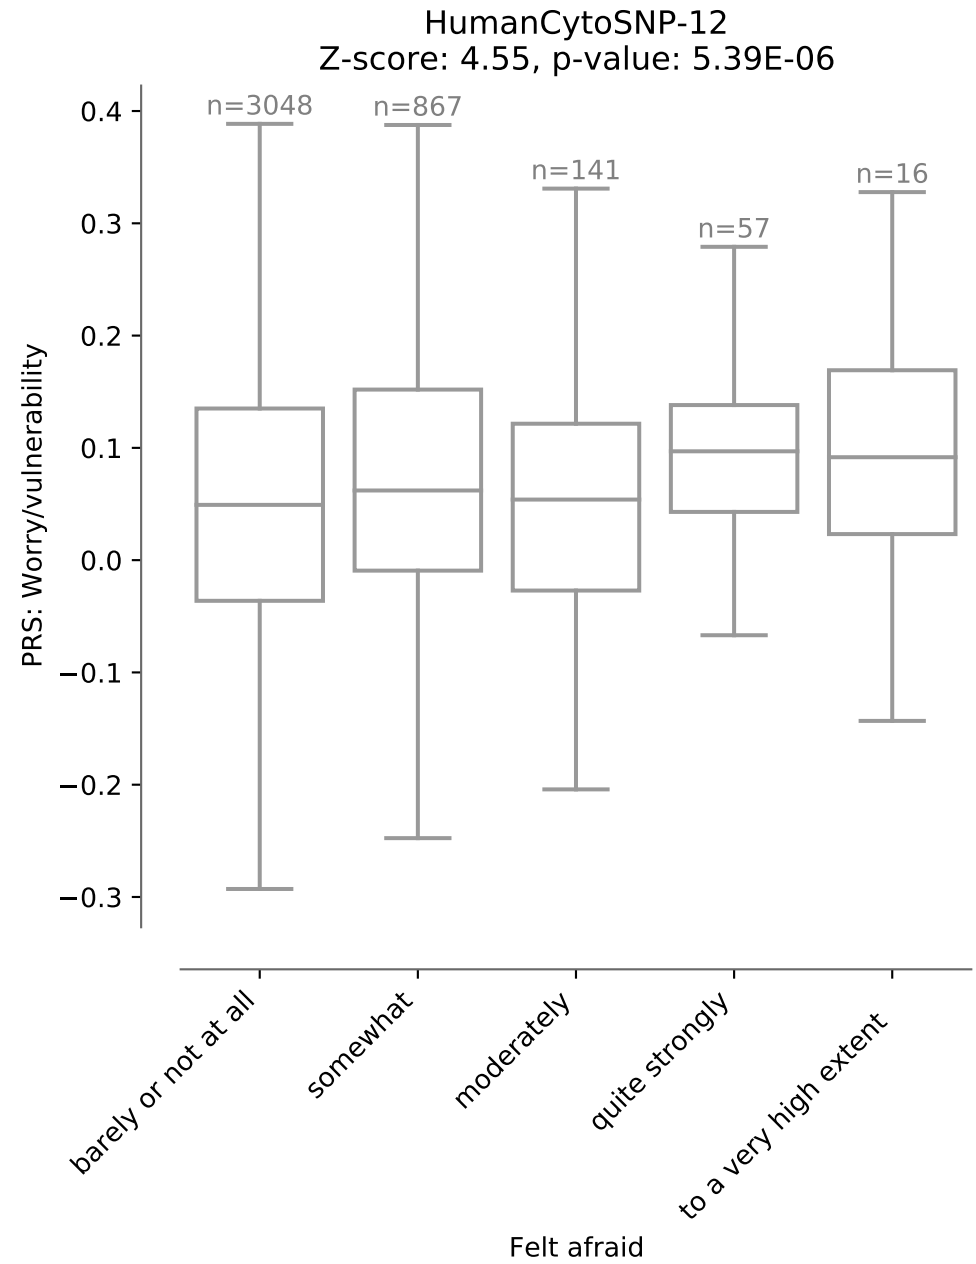



Felt sad  
PGS: Depression  
Meta analysis Z-score: 5.30, p-value: 1.13E-07

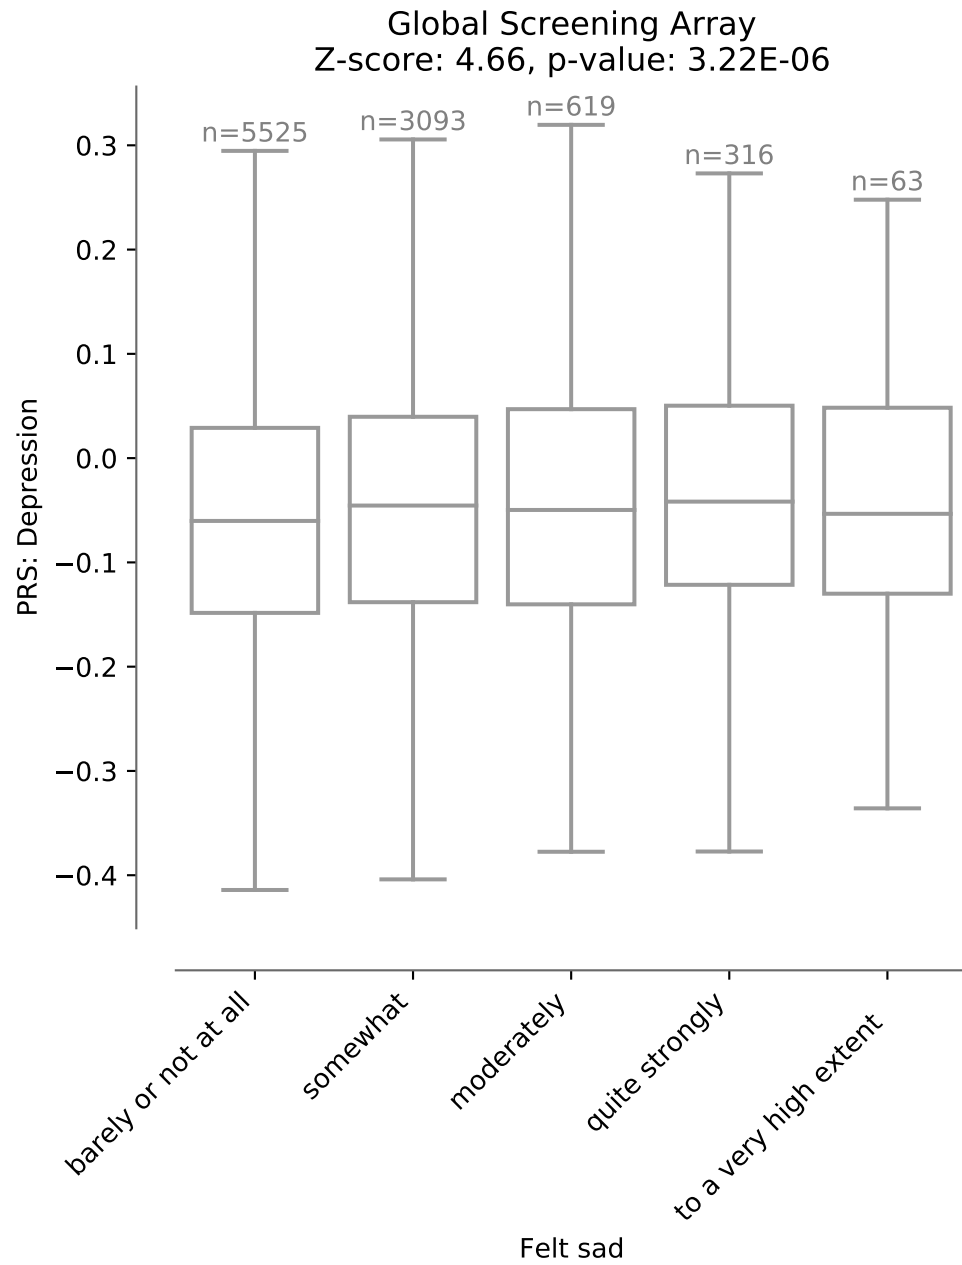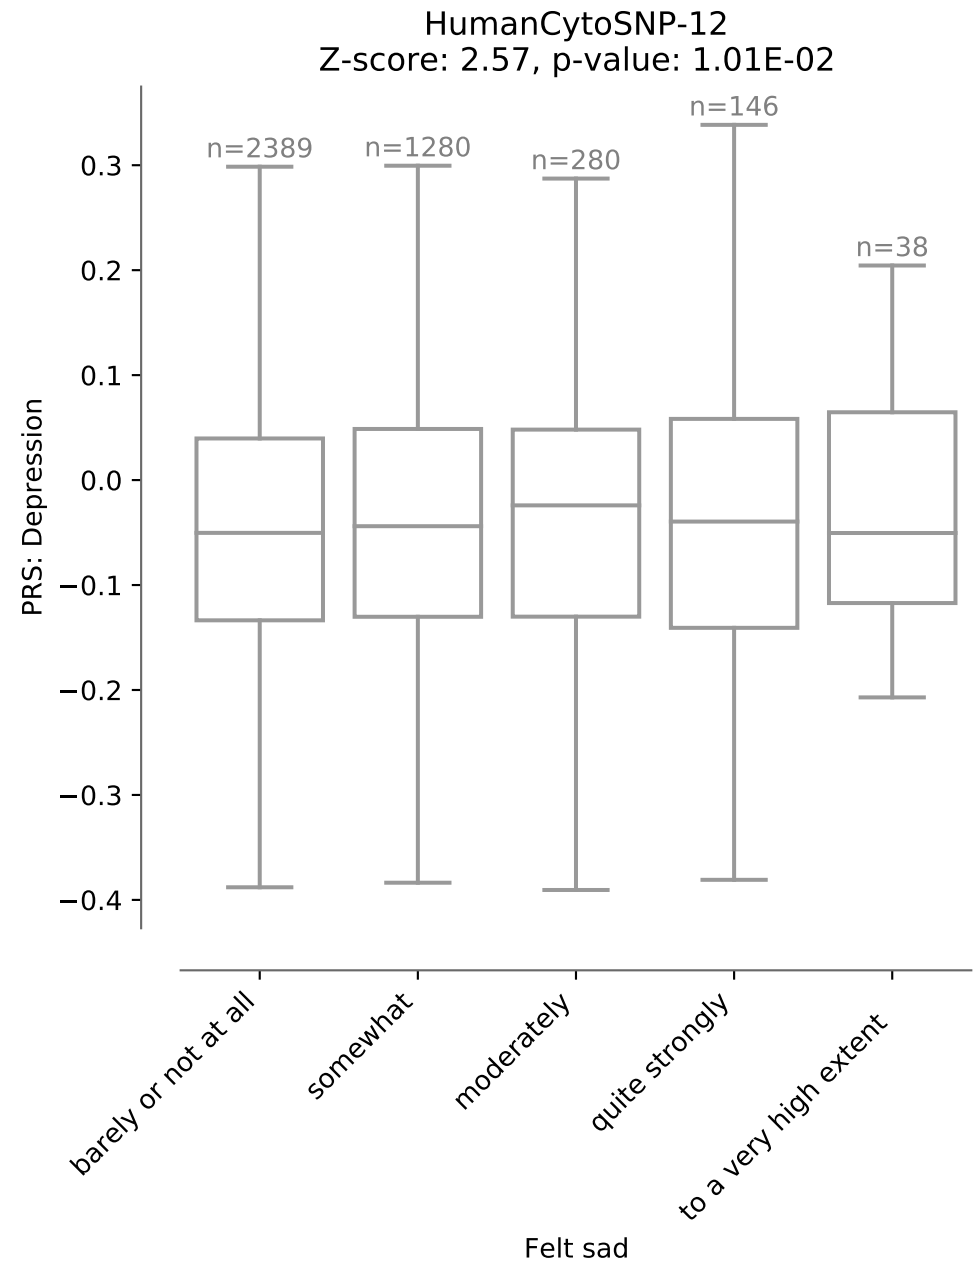

Felt sad  
PGS: Life satisfaction  
Meta analysis Z-score: -7.86, p-value: 3.95E-15

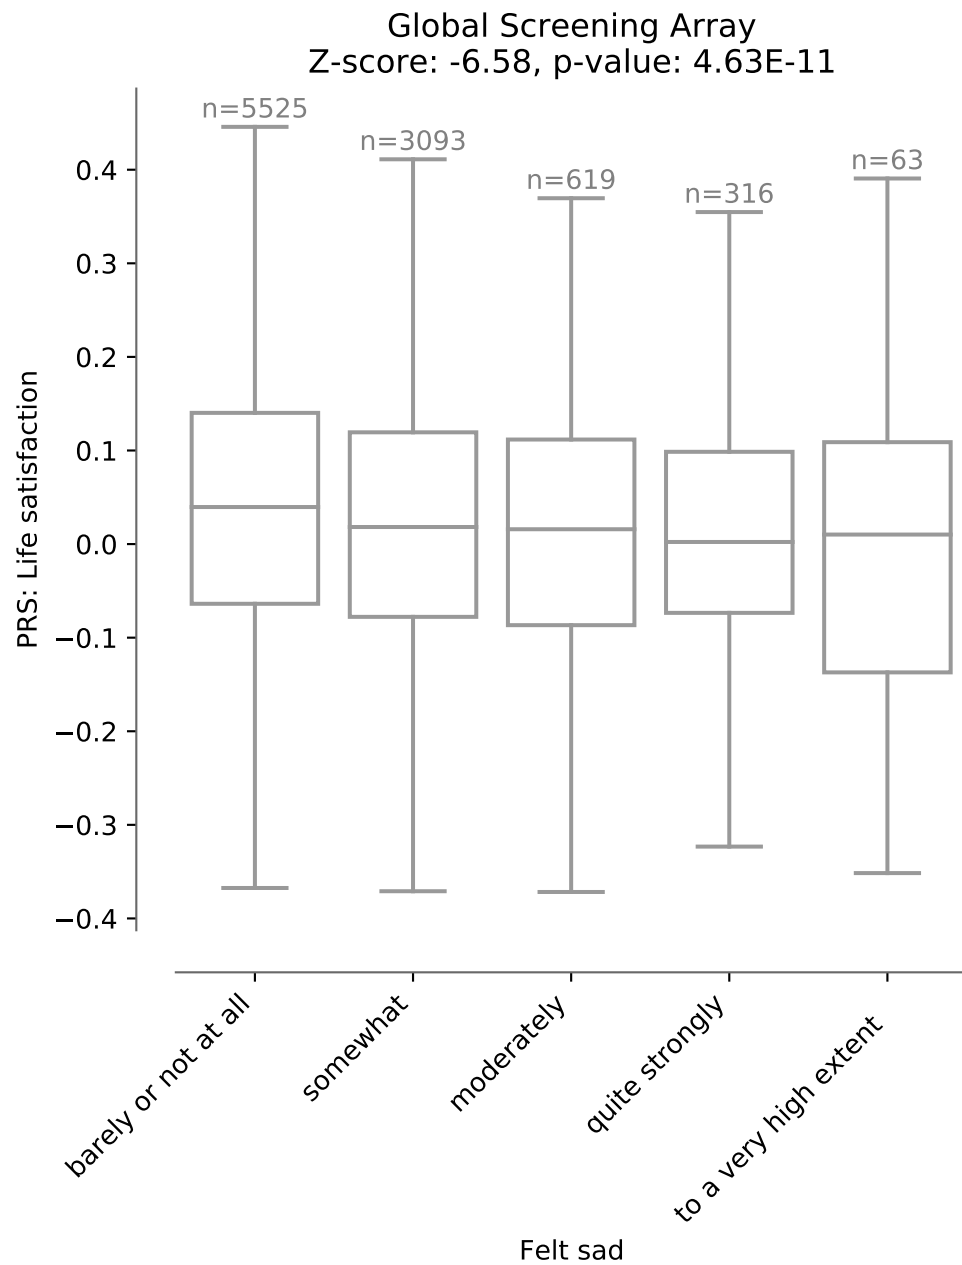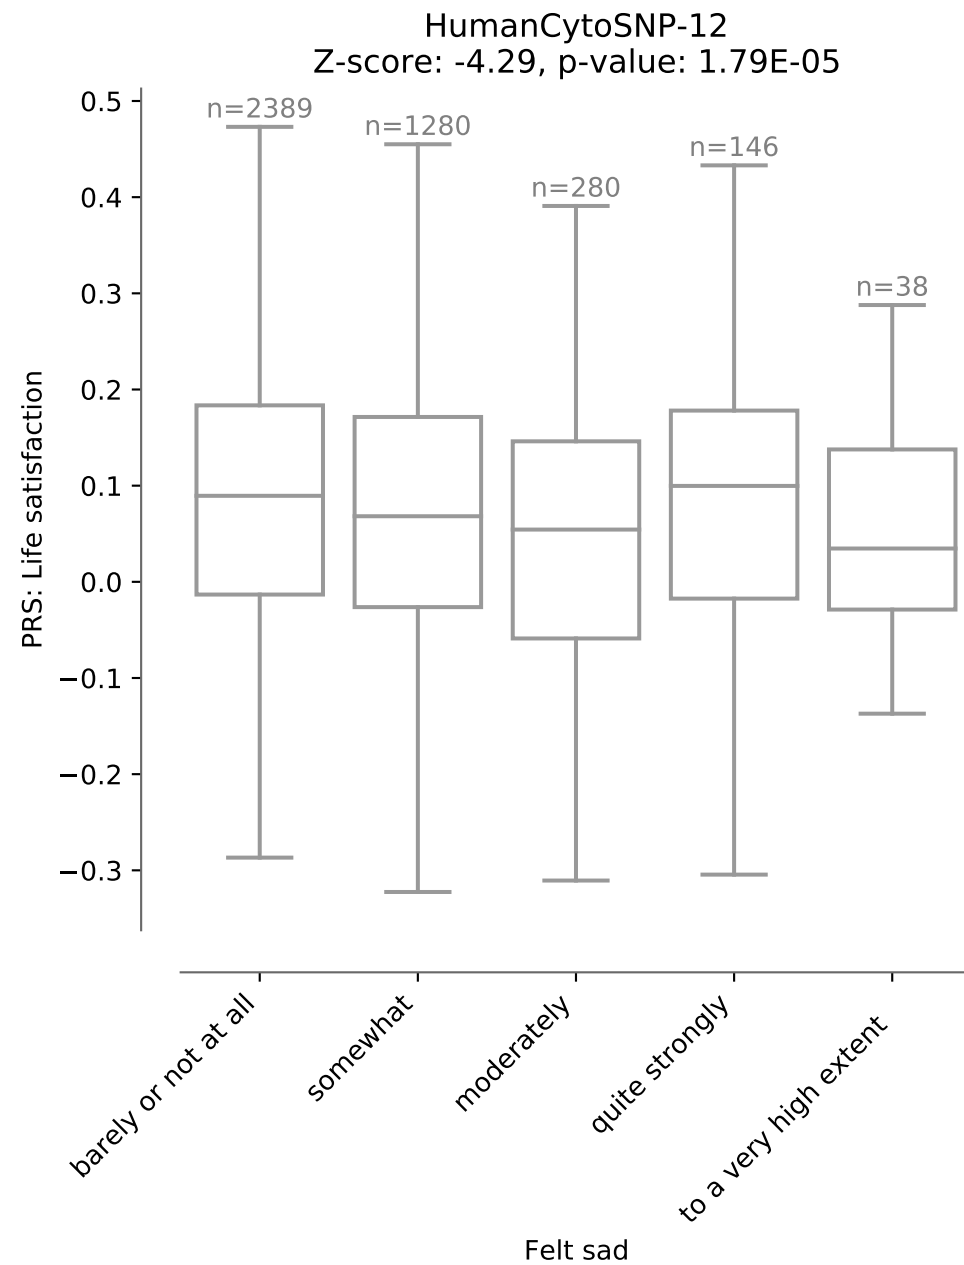

Felt sad  
PGS: Neuroticism  
Meta analysis Z-score: 8.24, p-value: 1.65E-16

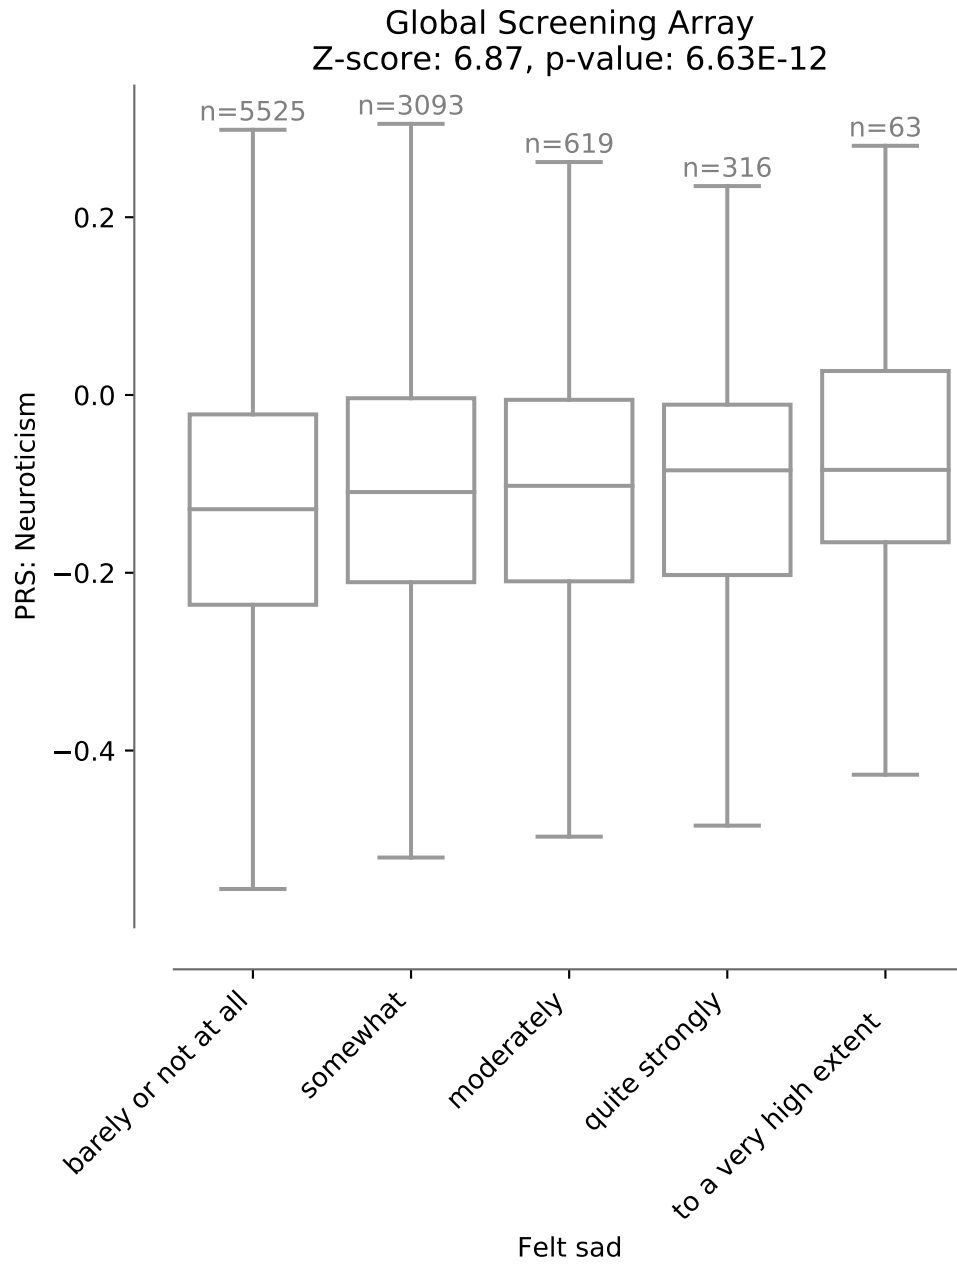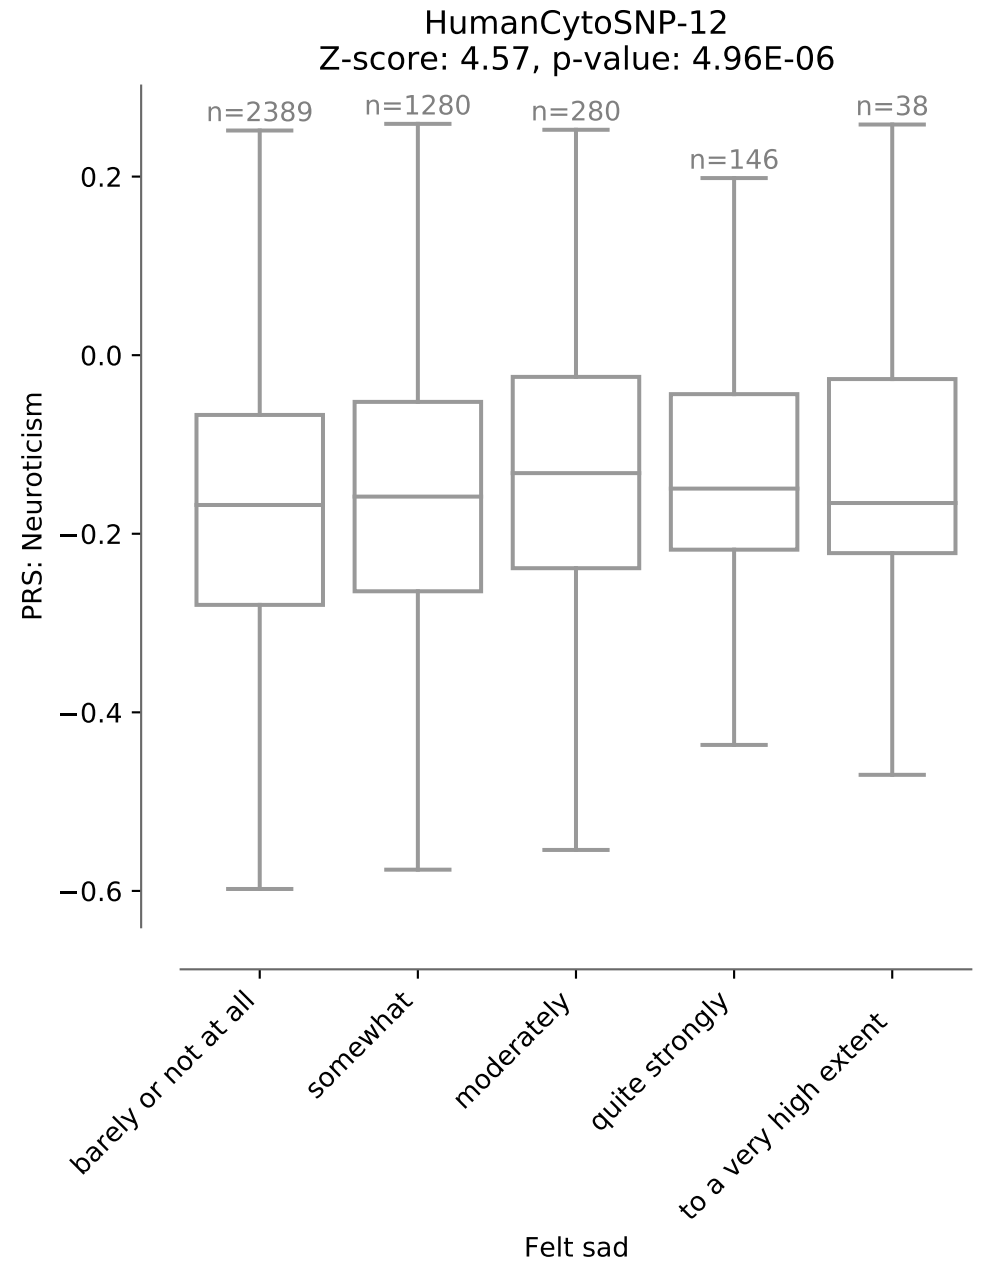

Having quarantined or gone into (self-)isolation during second wave  
PGS: Educational attainment  
Meta analysis Z-score: 5.09, p-value: 3.63E-07

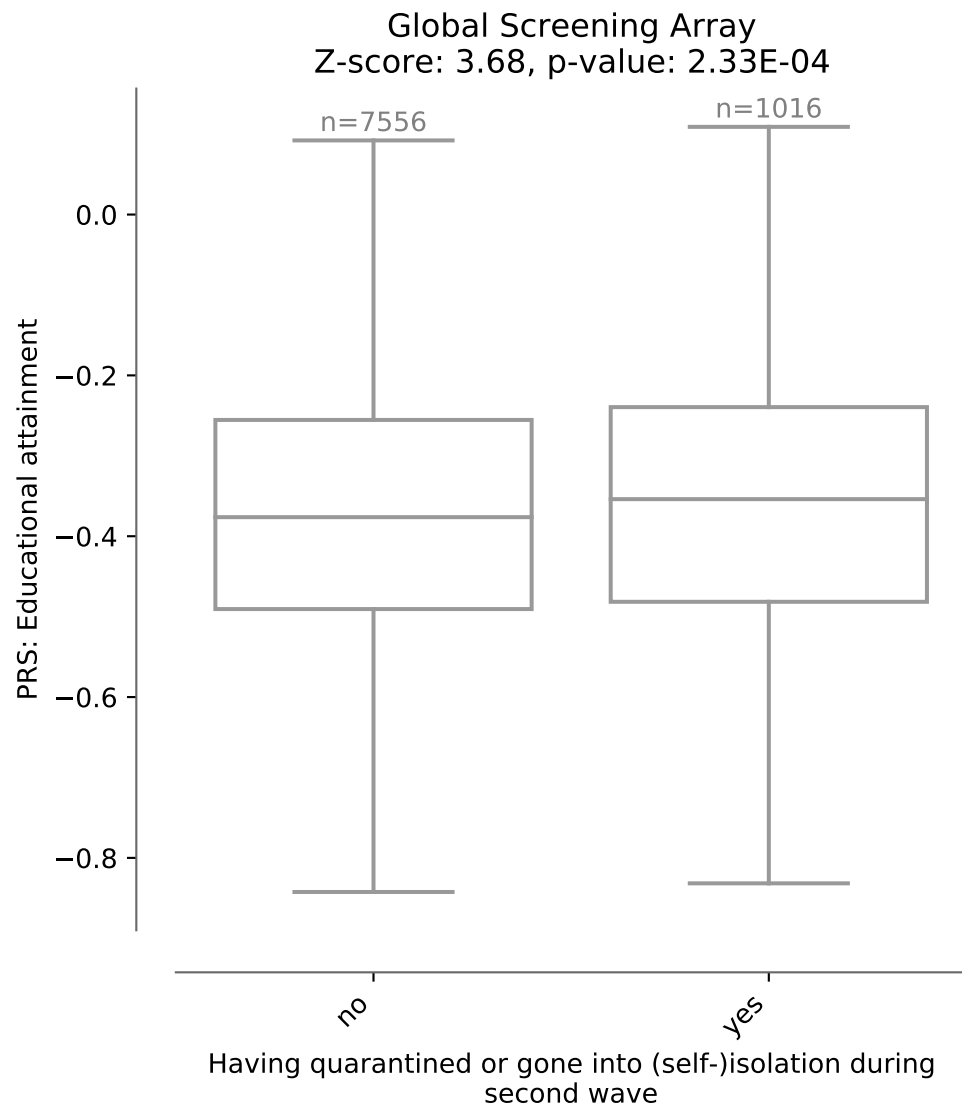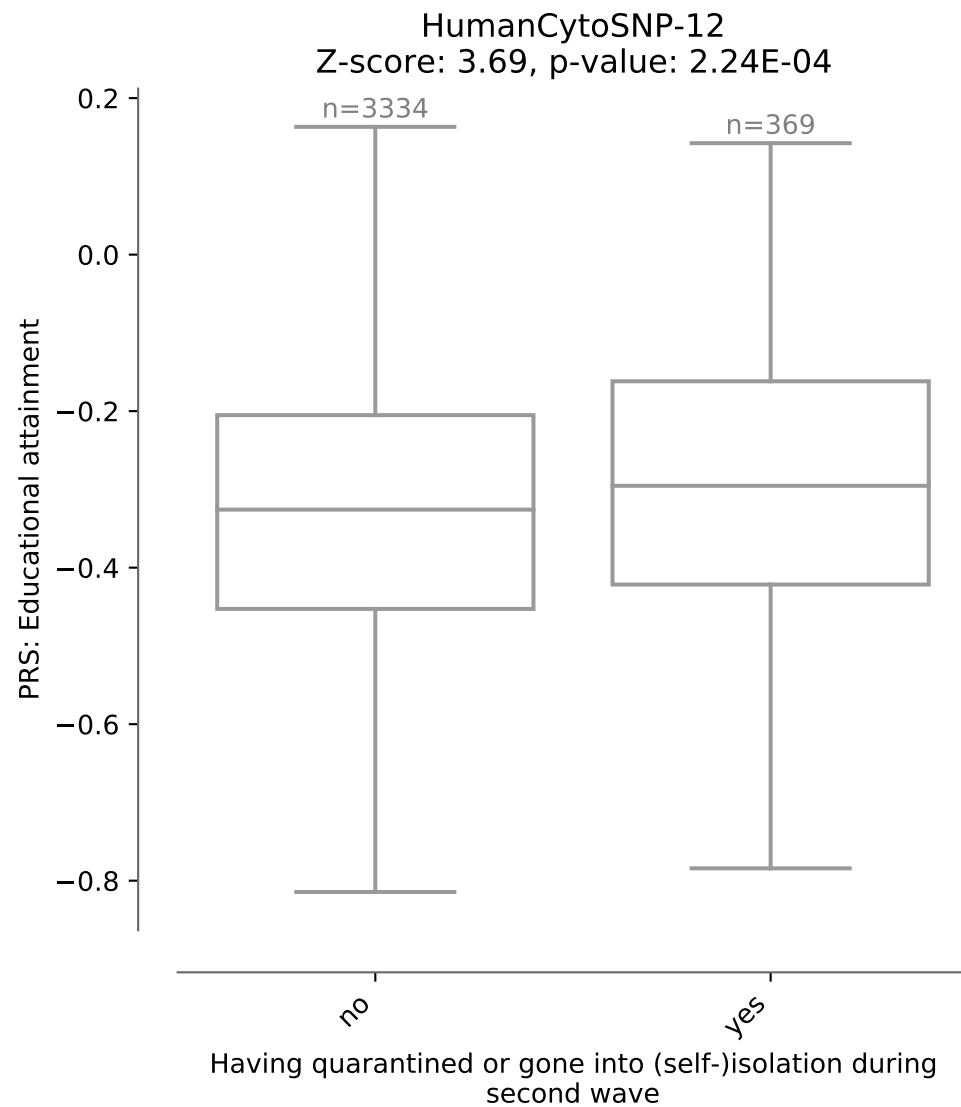

Having wintersport planned  
PGS: General risk tolerance  
Meta analysis Z-score: 4.94, p-value: 7.73E-07

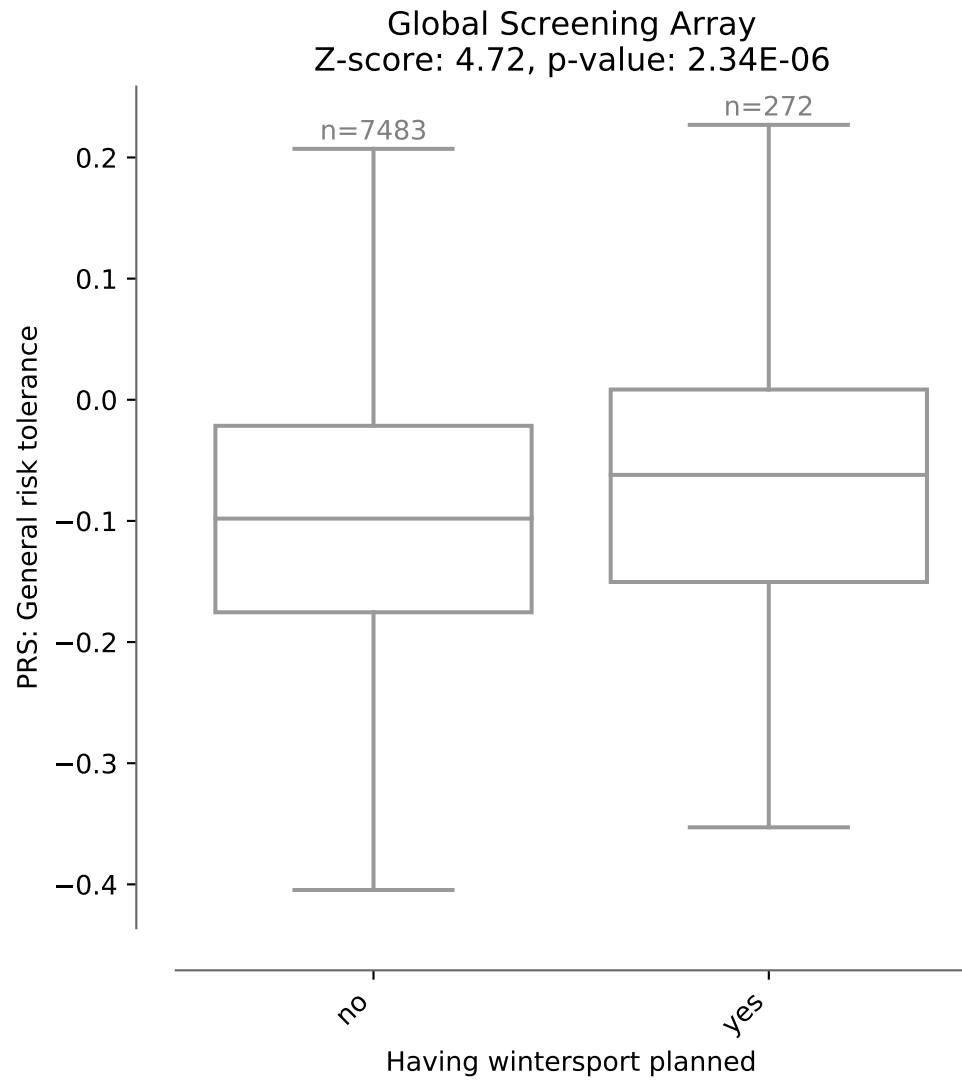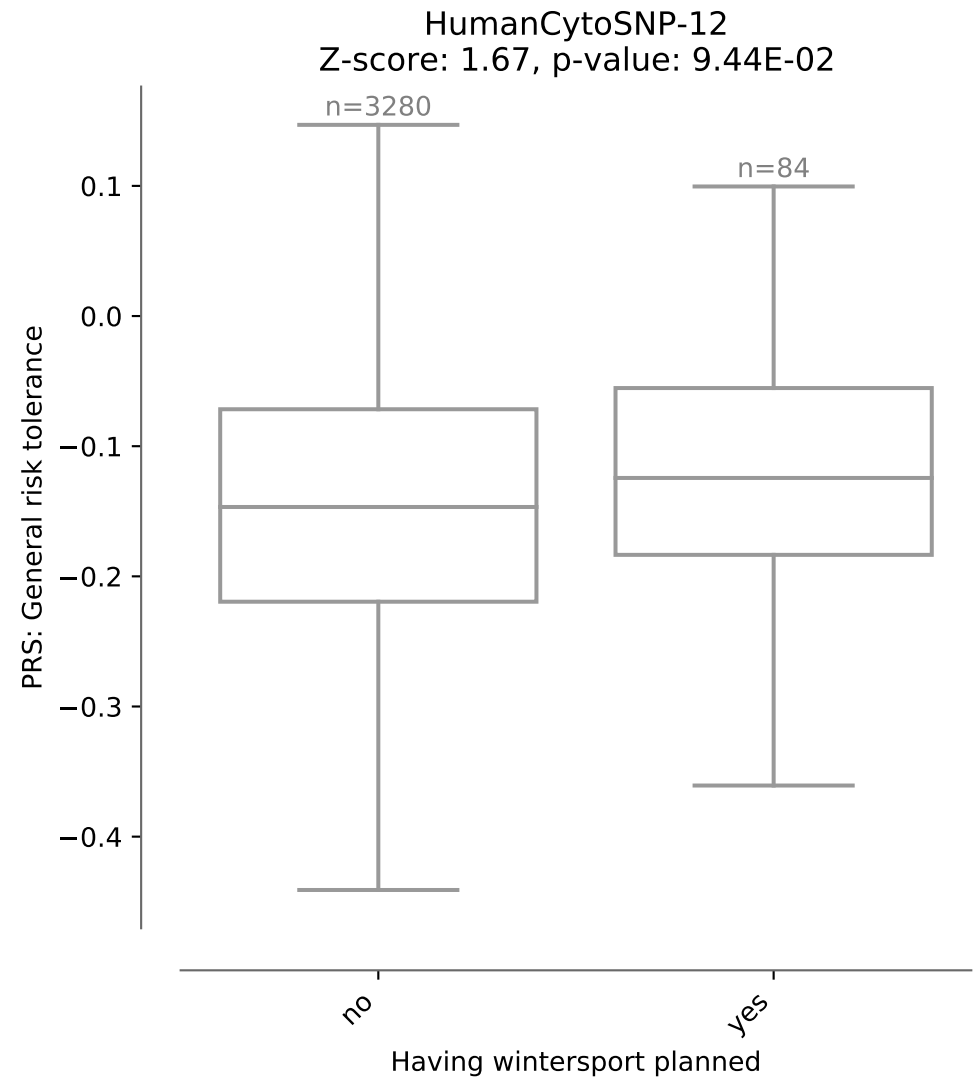

Felt ashamed  
PGS: Worry/vulnerability  
Meta analysis Z-score: 5.00, p-value: 5.72E-07

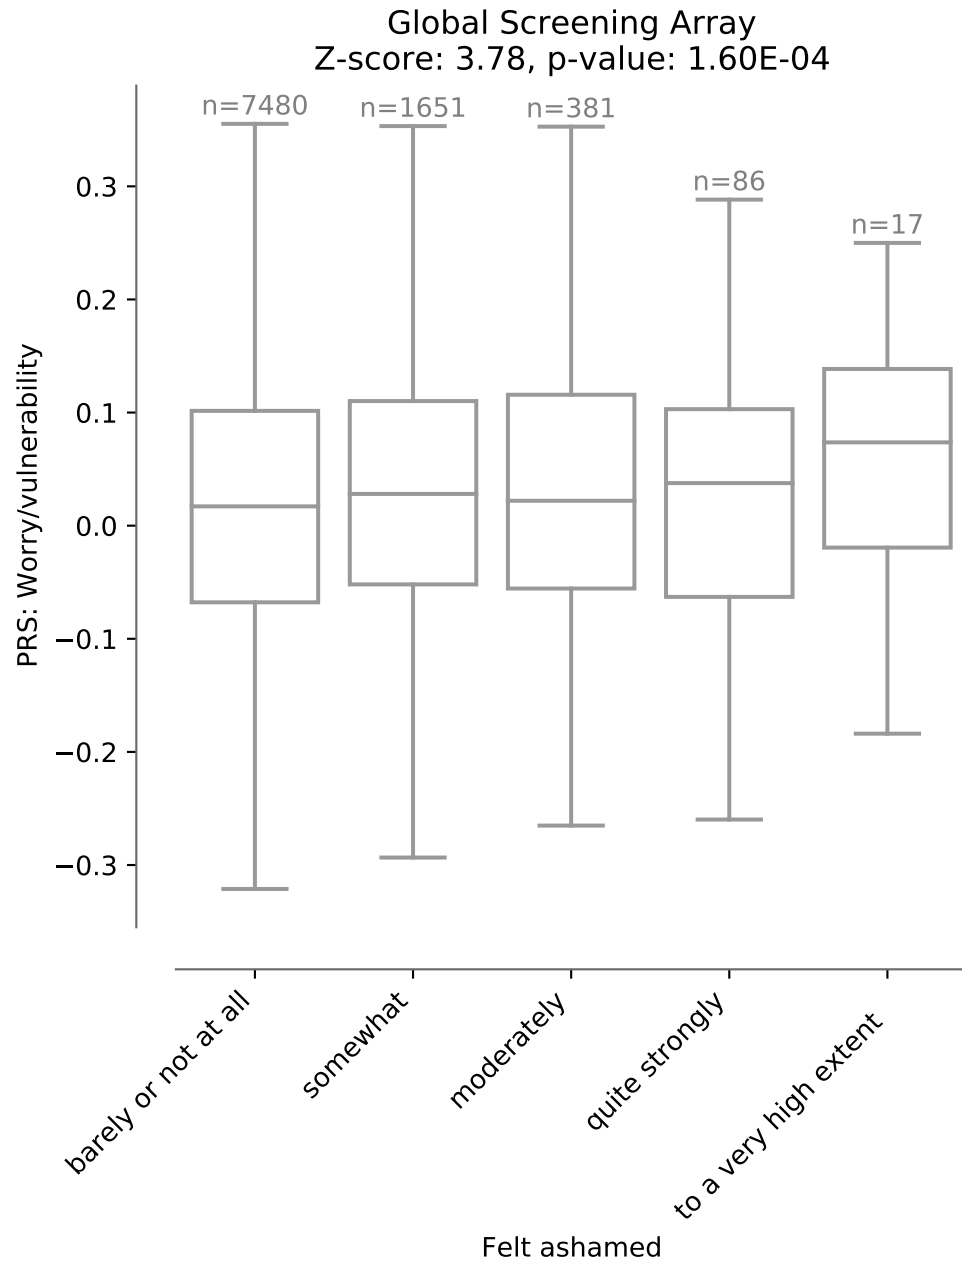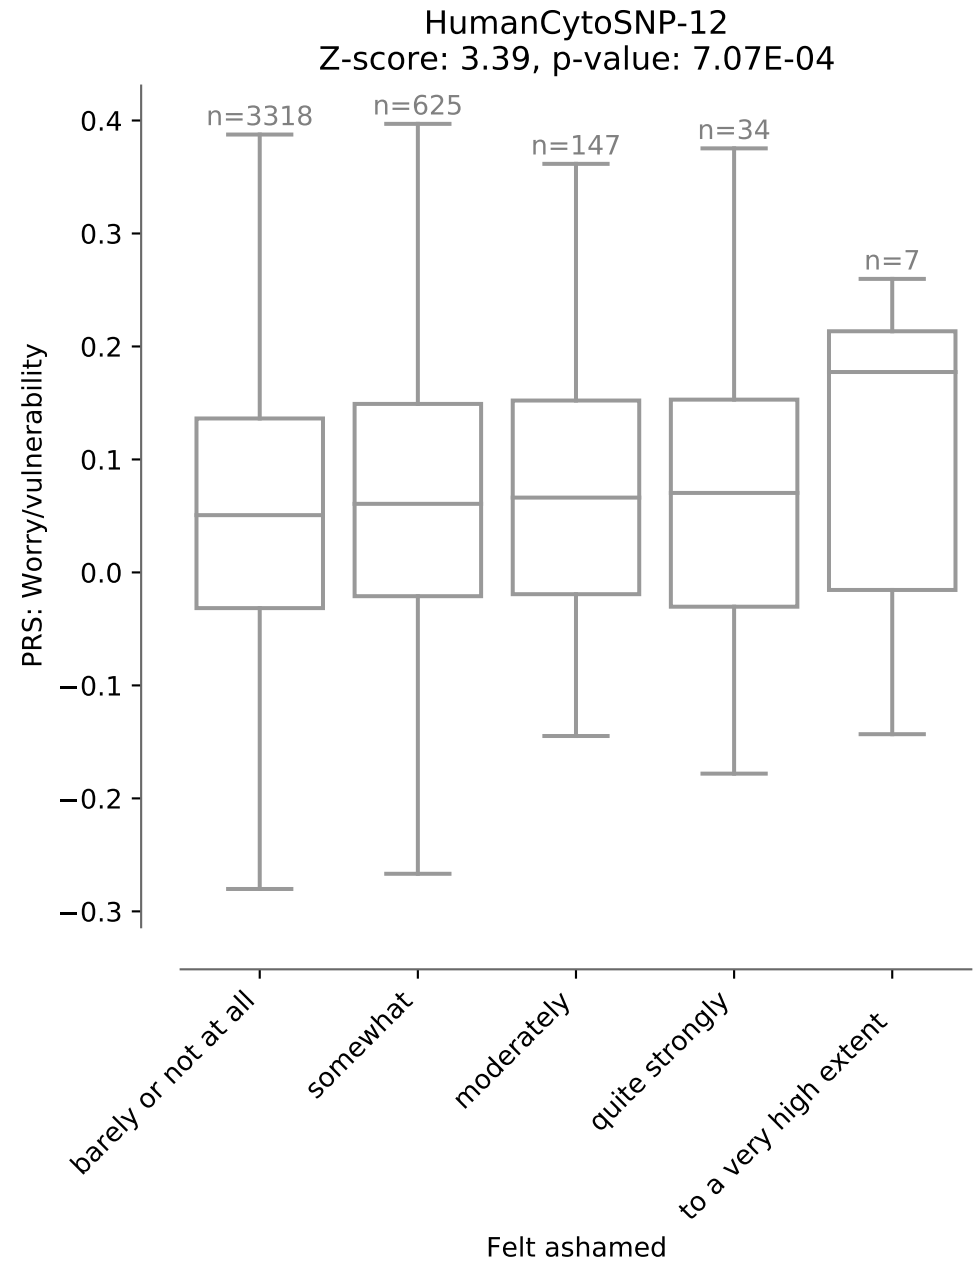

Having been able able to keep distance during a friend and/or family visit

PGS: Educational attainment

Meta analysis Z-score: -4.77, p-value: 1.86E-06

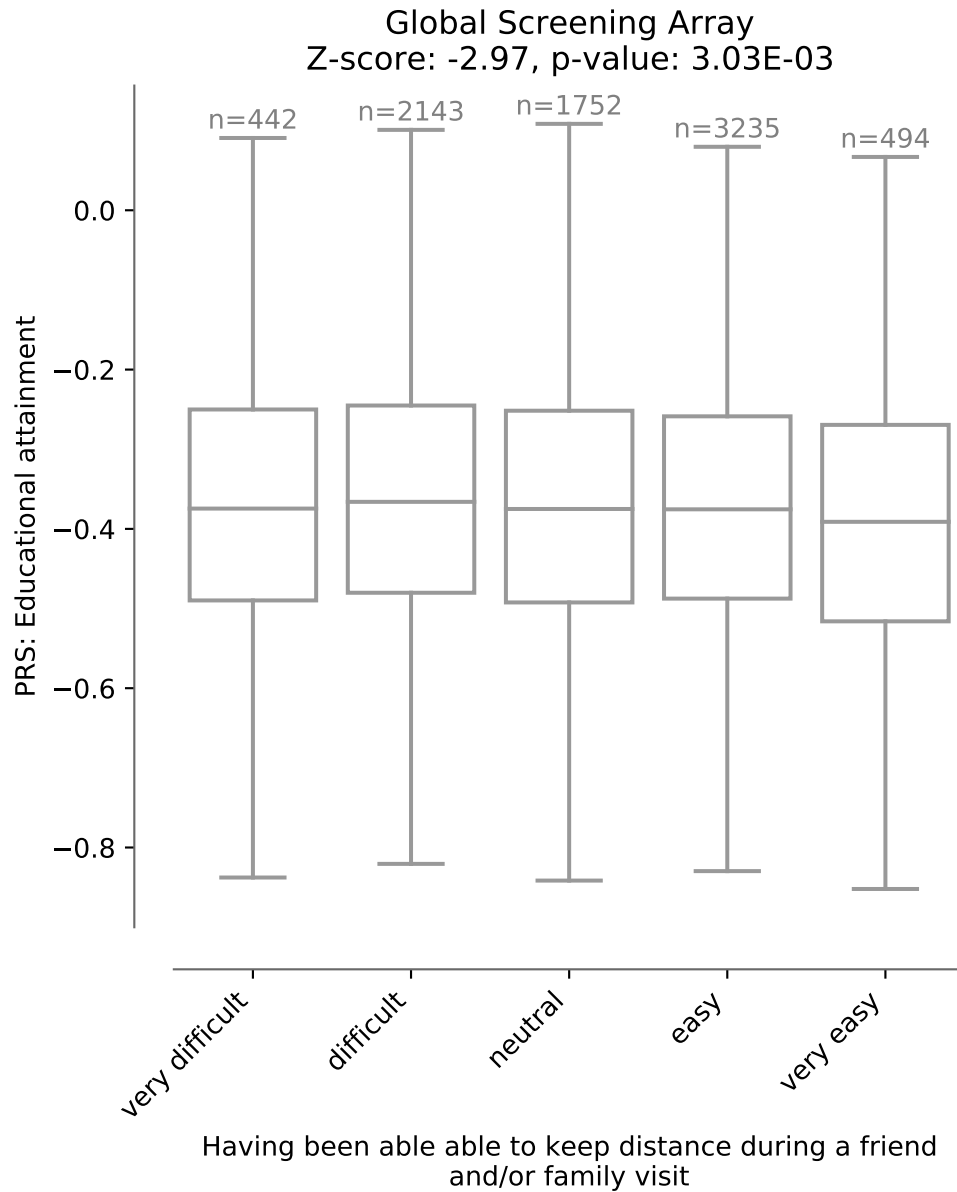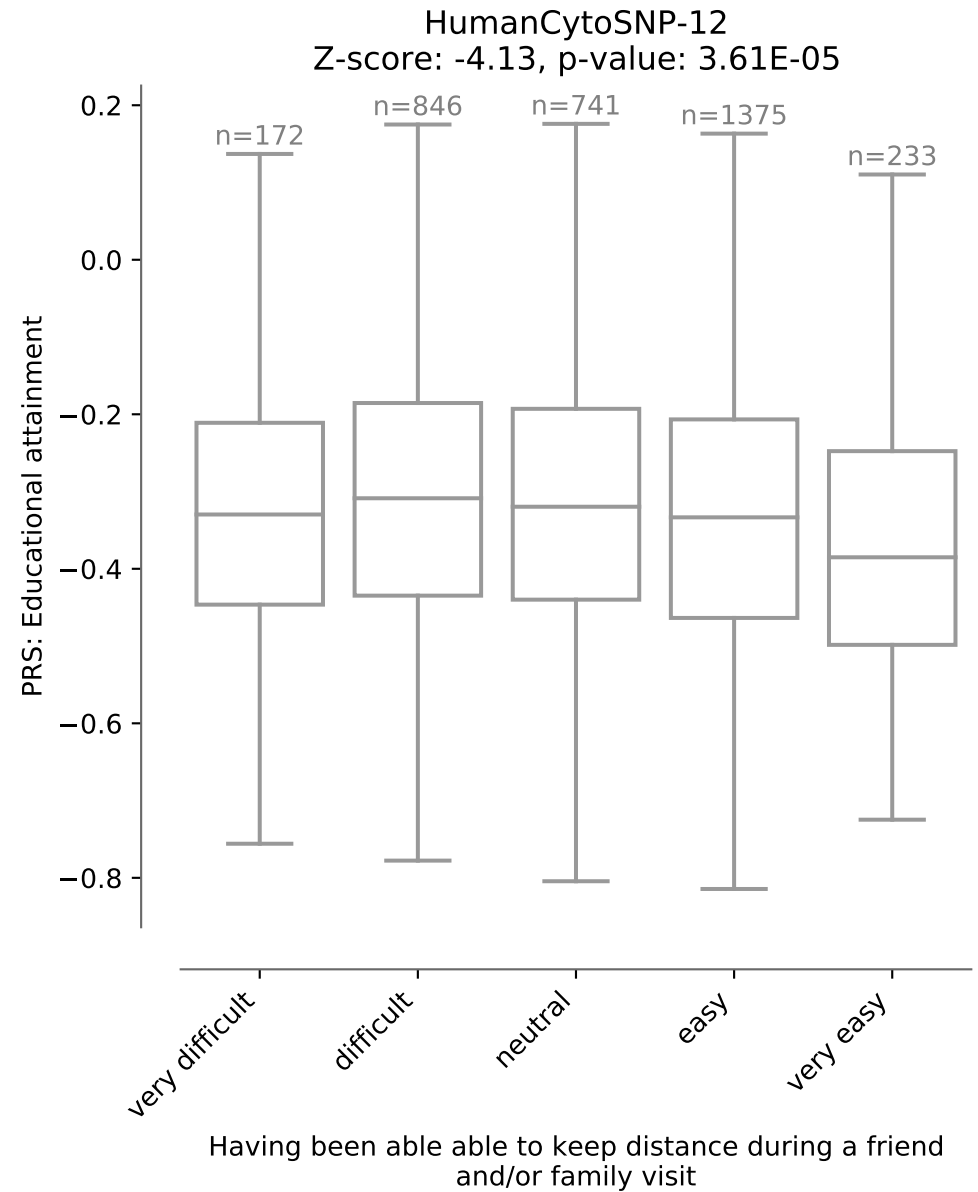

Had stomach pain  
PGS: Depression  
Meta analysis Z-score: 4.72, p-value: 2.41E-06

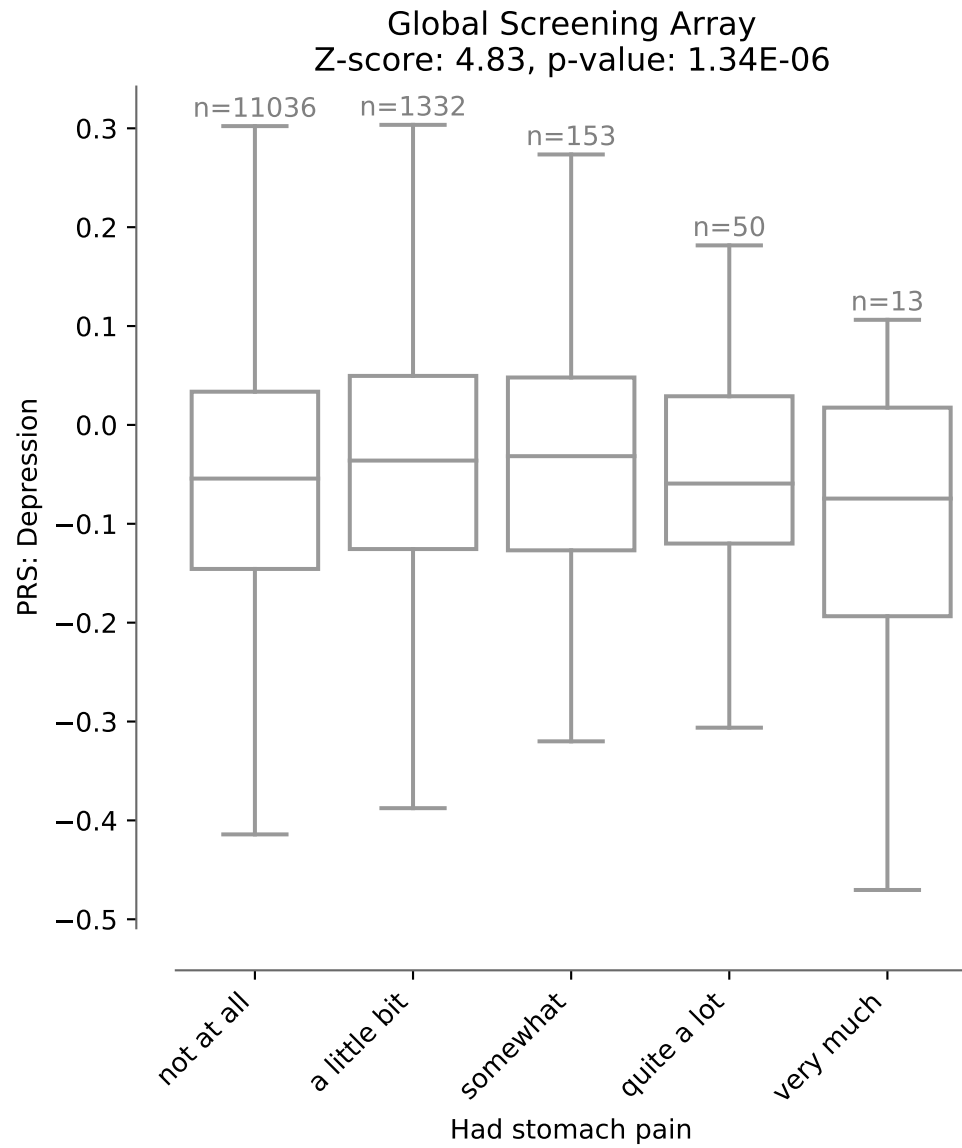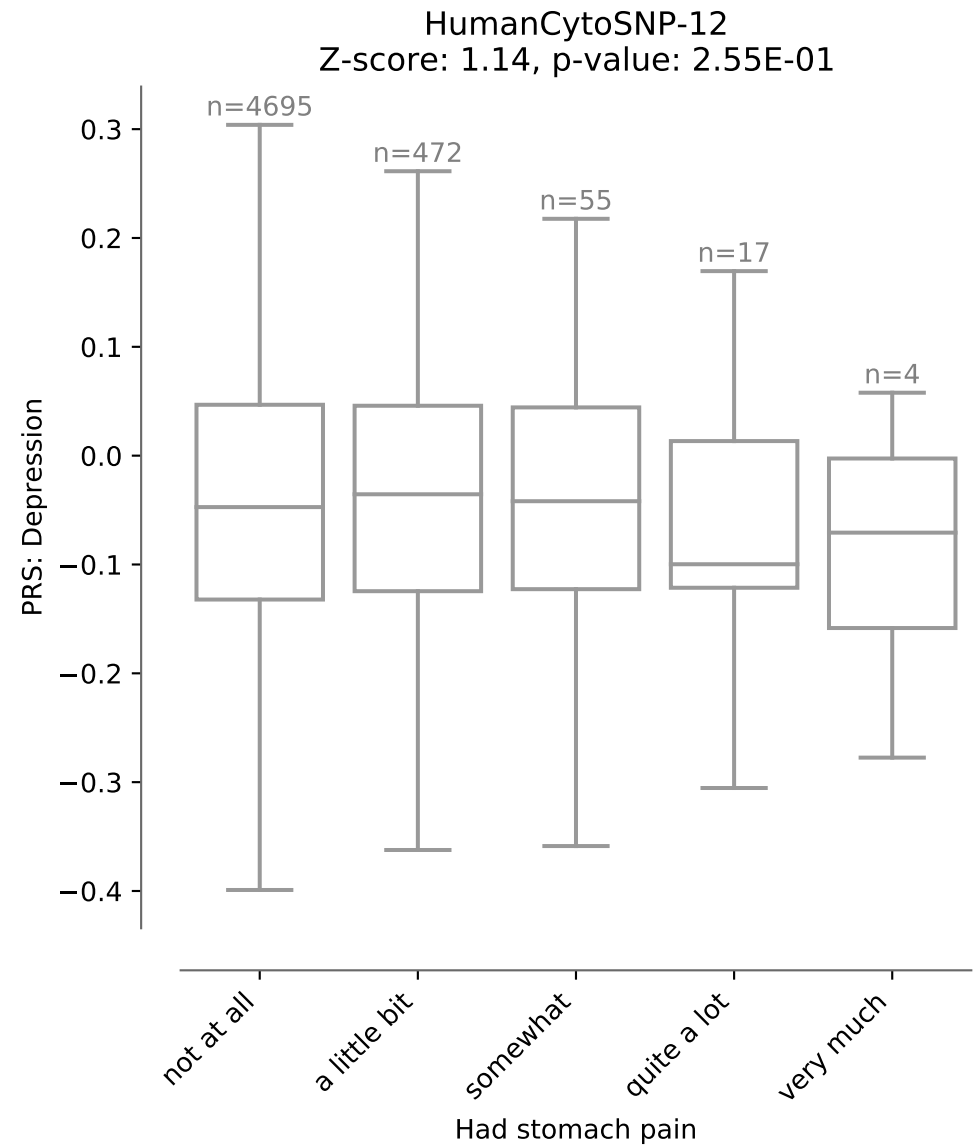



Had stomach pain  
PGS: Life satisfaction  
Meta analysis Z-score: -6.30, p-value: 2.92E-10

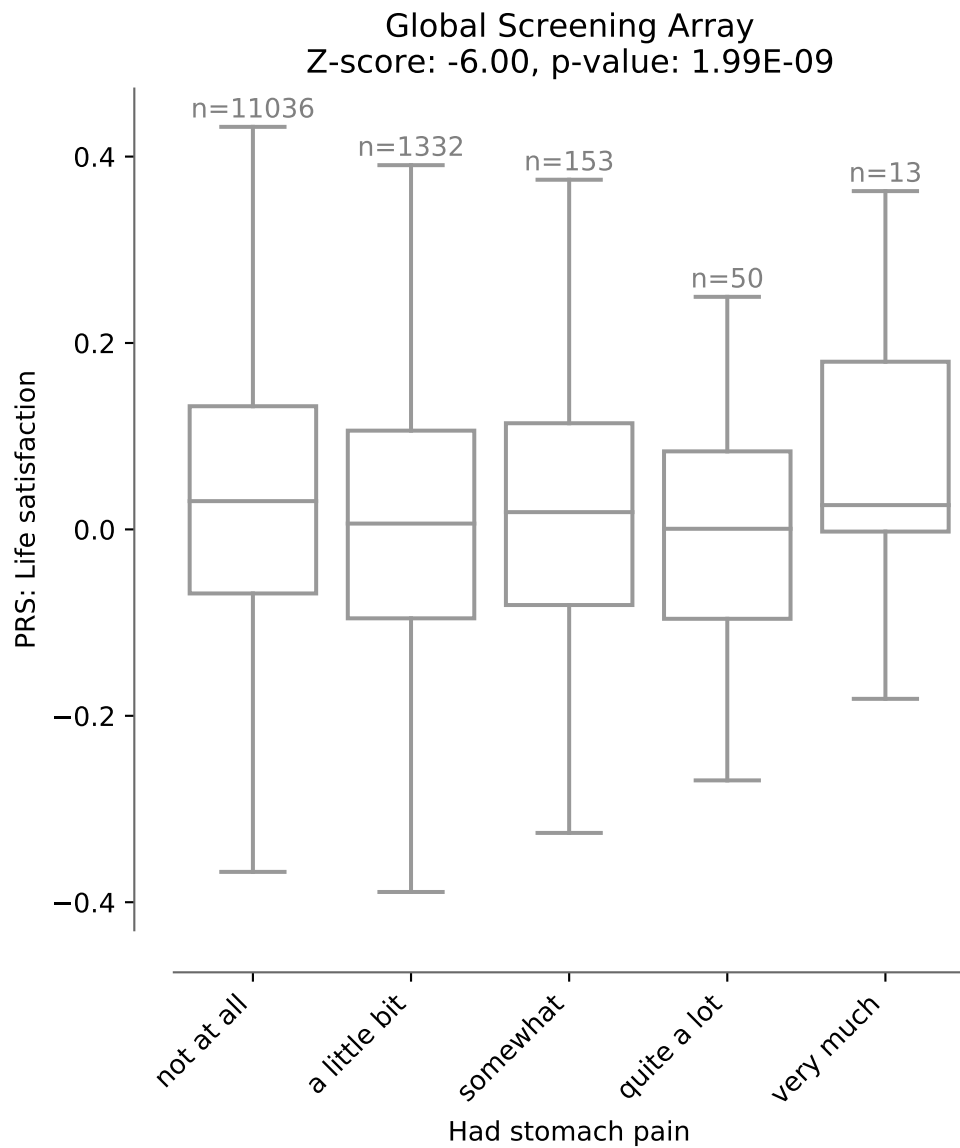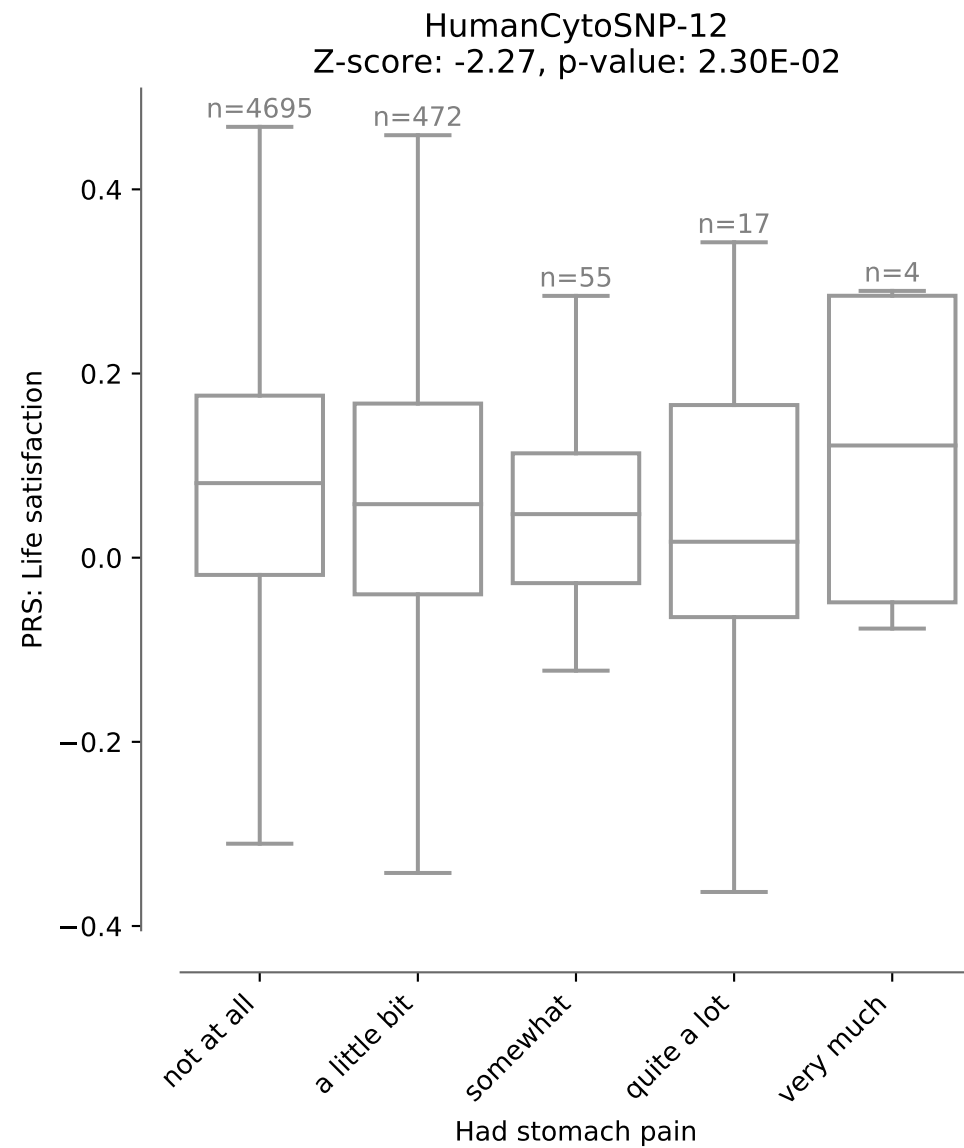

Had stomach pain  
PGS: Neuroticism  
Meta analysis Z-score: 5.35, p-value: 8.62E-08

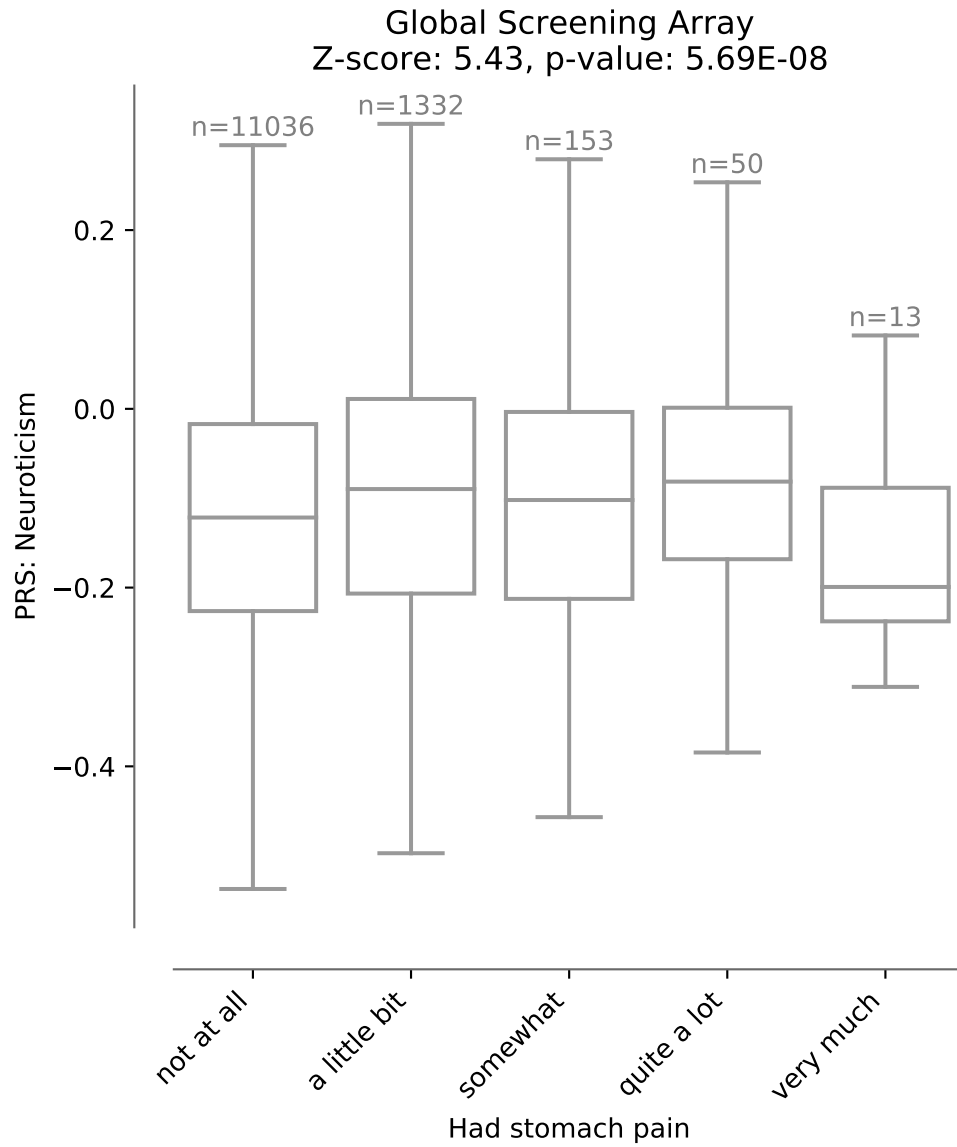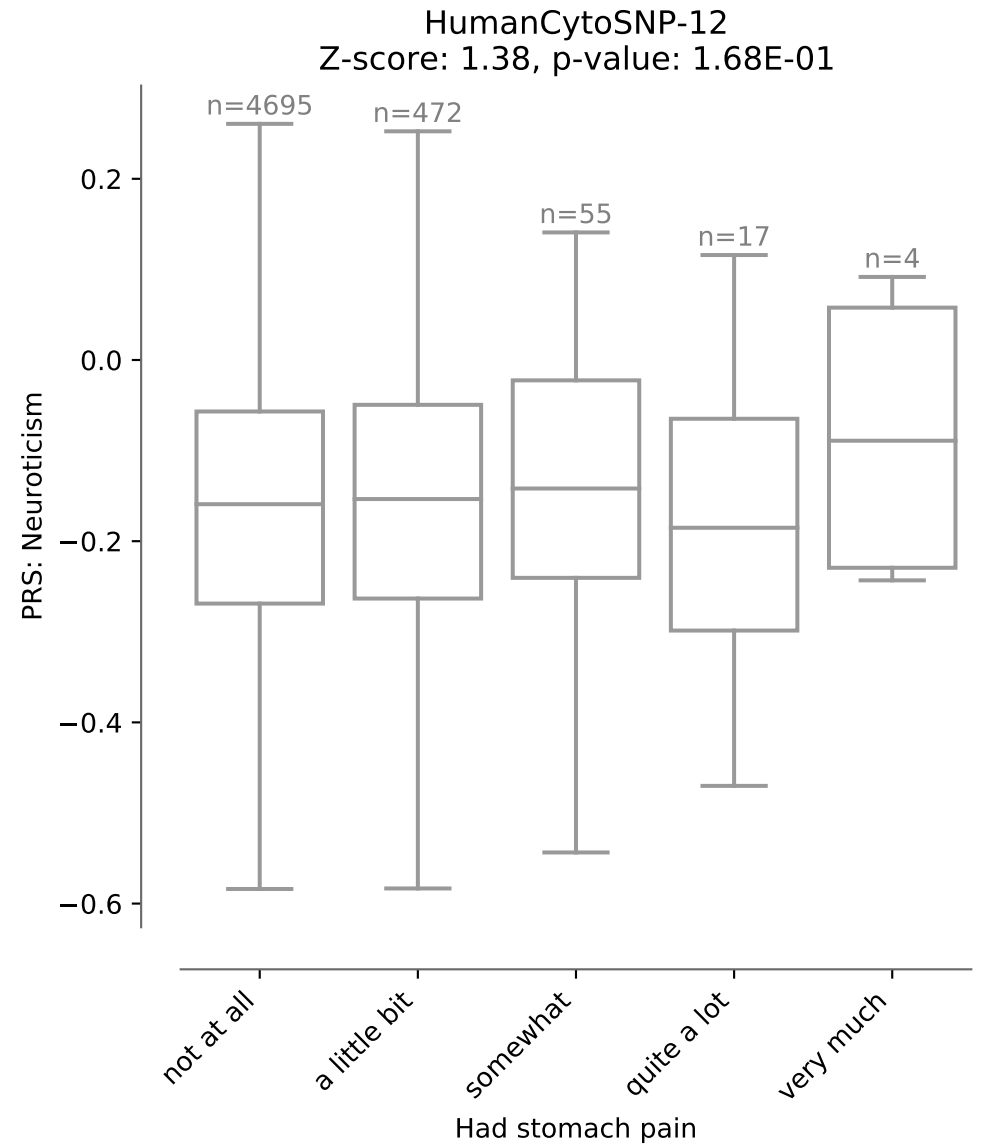

Had stomach pain  
PGS: Schizophrenia  
Meta analysis Z-score: 5.16, p-value: 2.49E-07

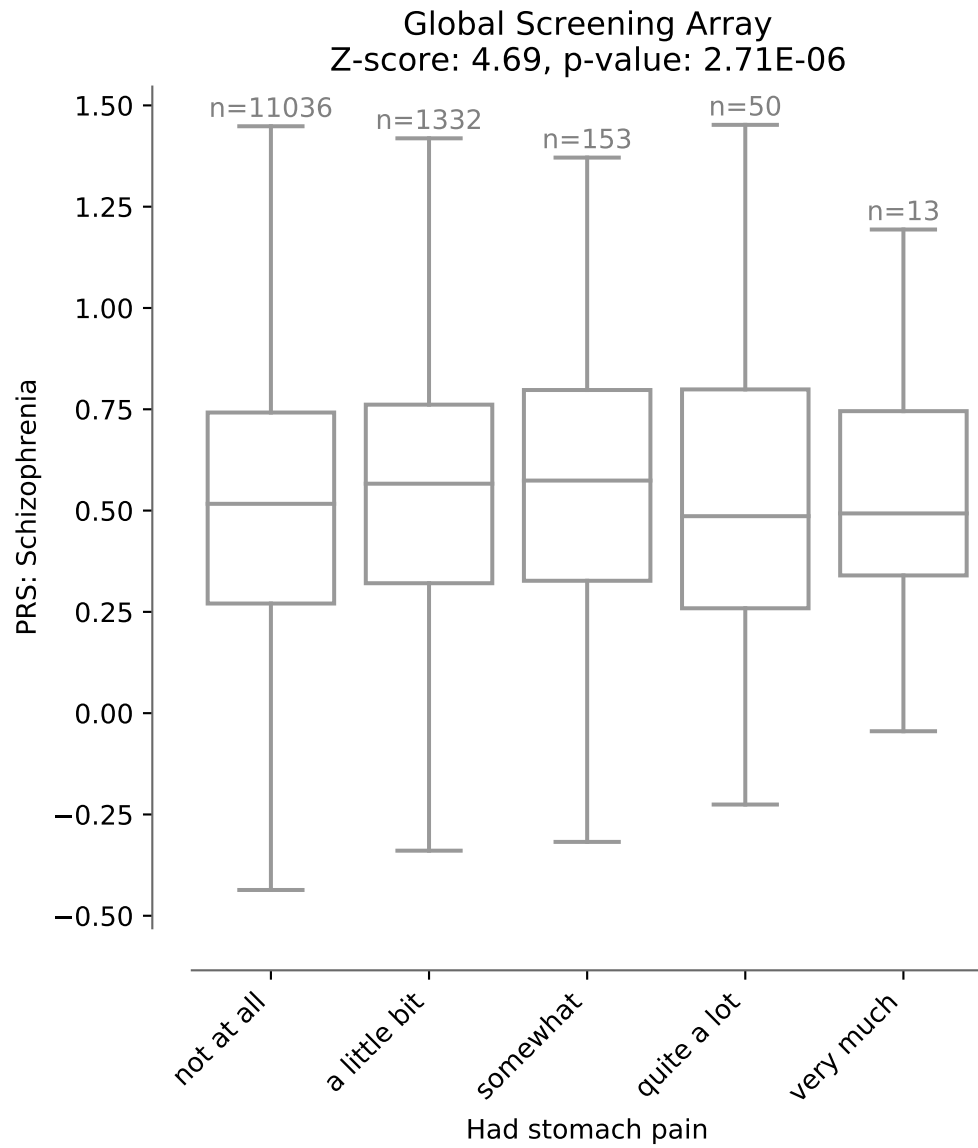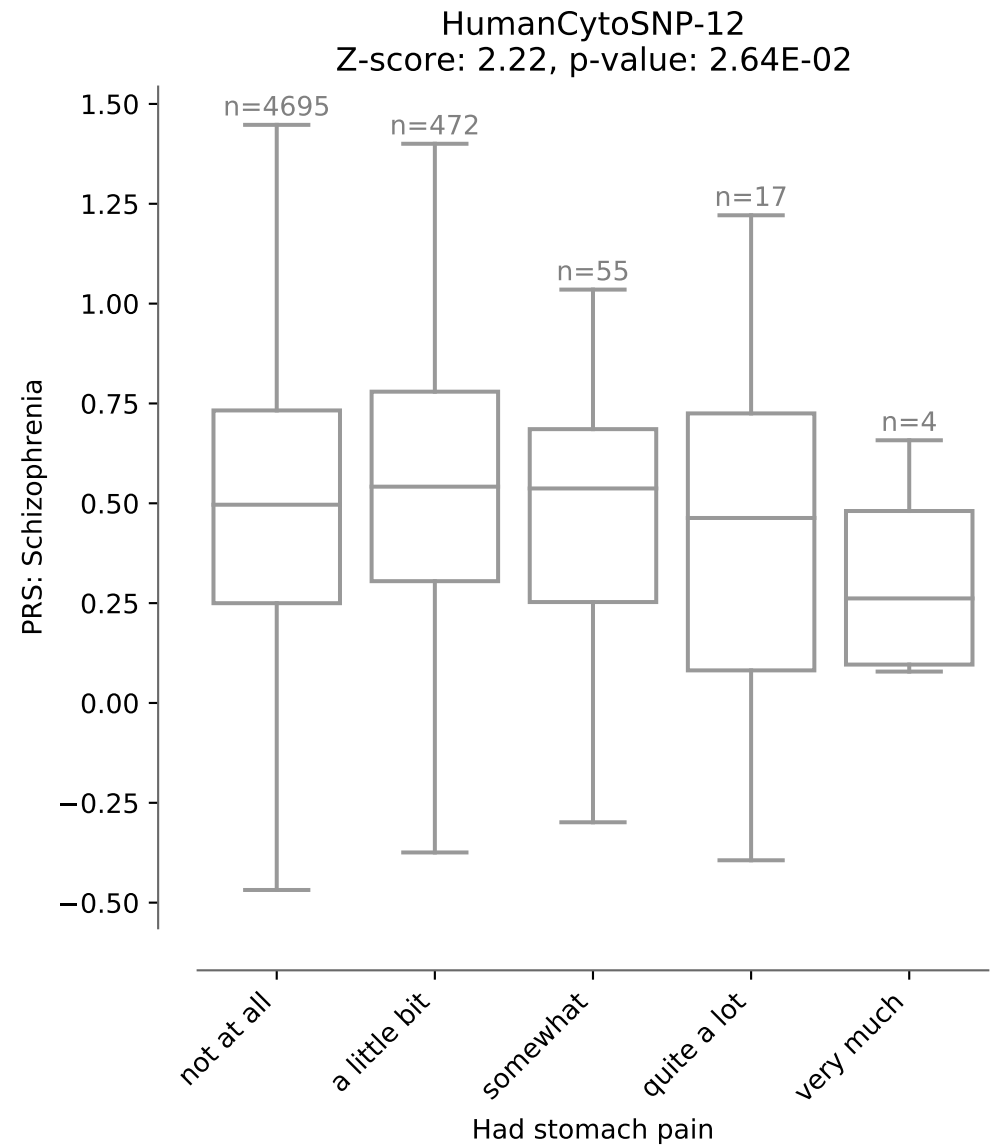

Estimated chance to infect someone else  
PGS: Educational attainment  
Meta analysis Z-score: -5.81, p-value: 6.15E-09

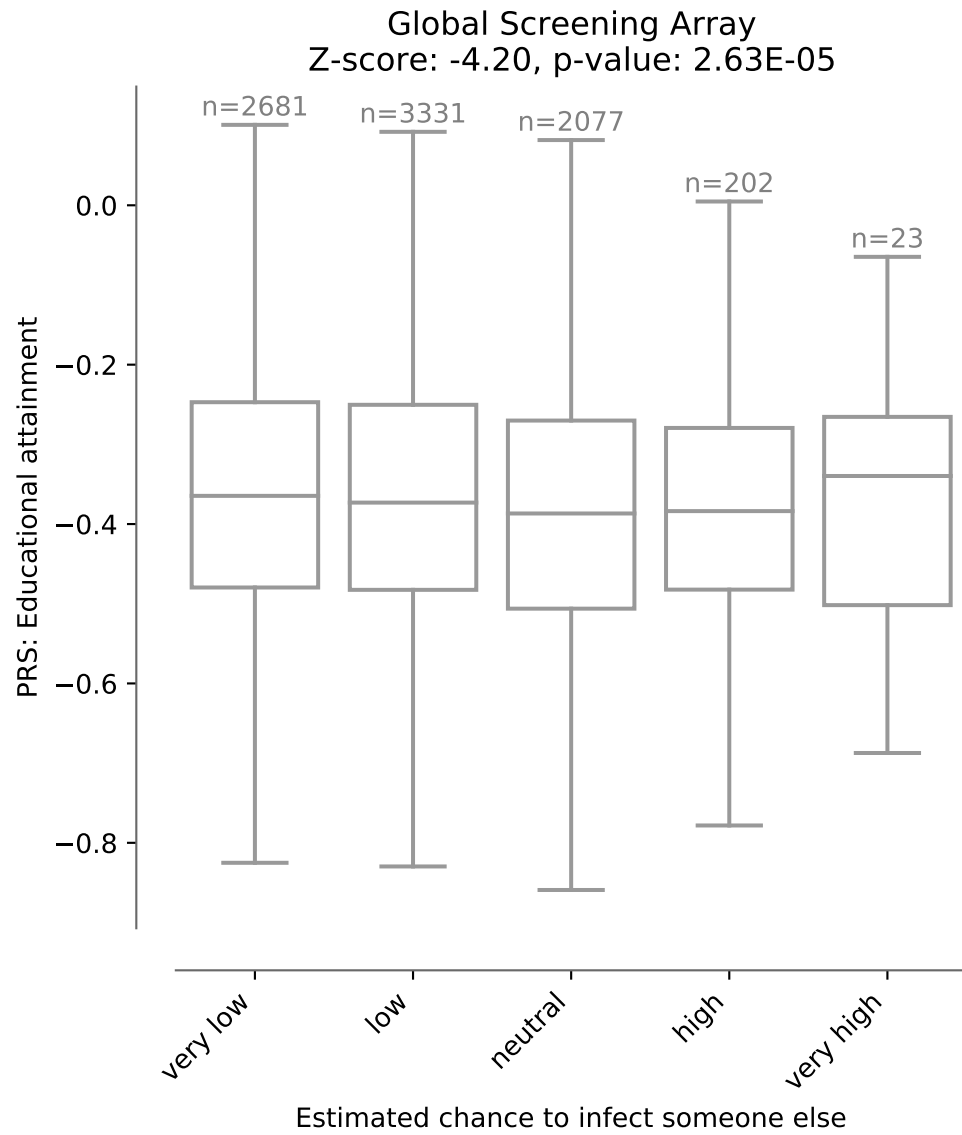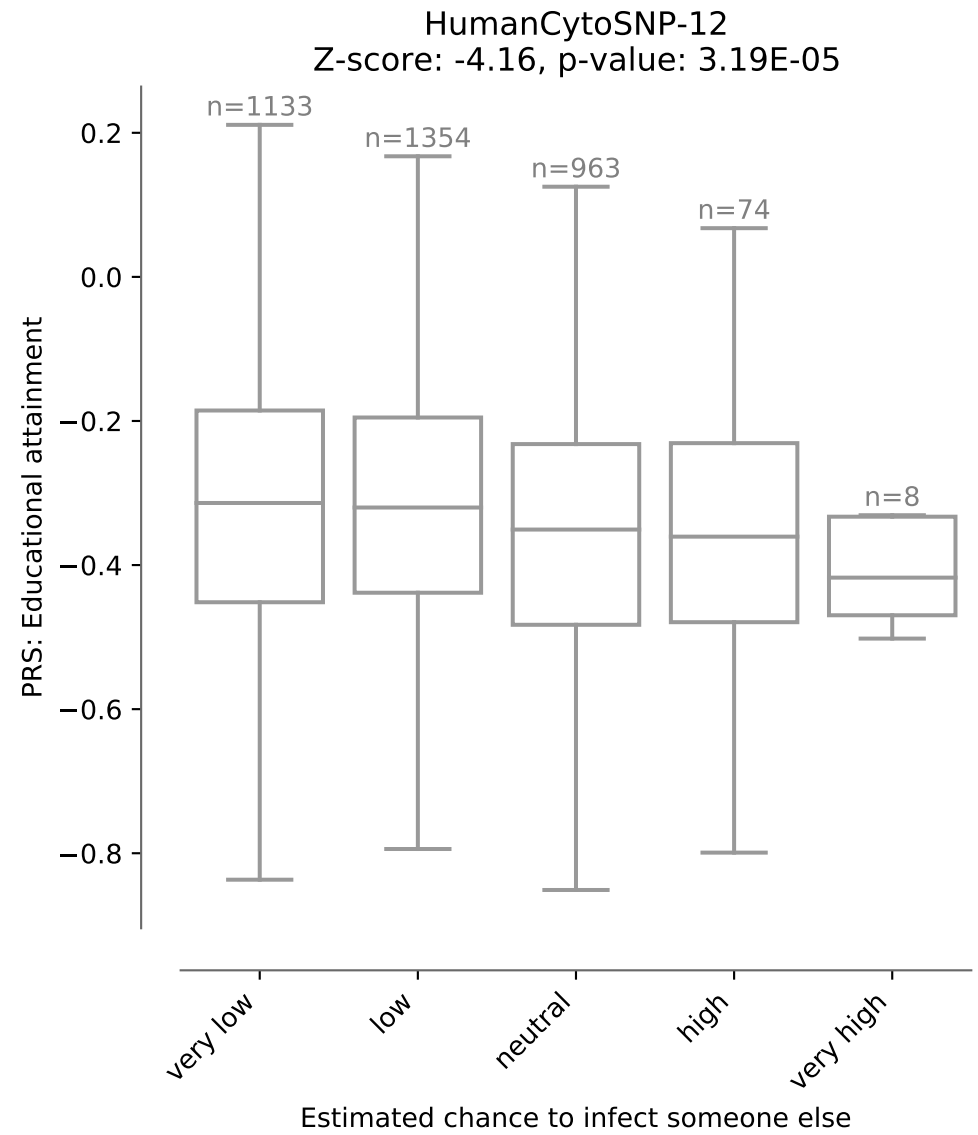

Estimated chance to infect someone else  
PGS: Neuroticism  
Meta analysis Z-score: 5.95, p-value: 2.71E-09

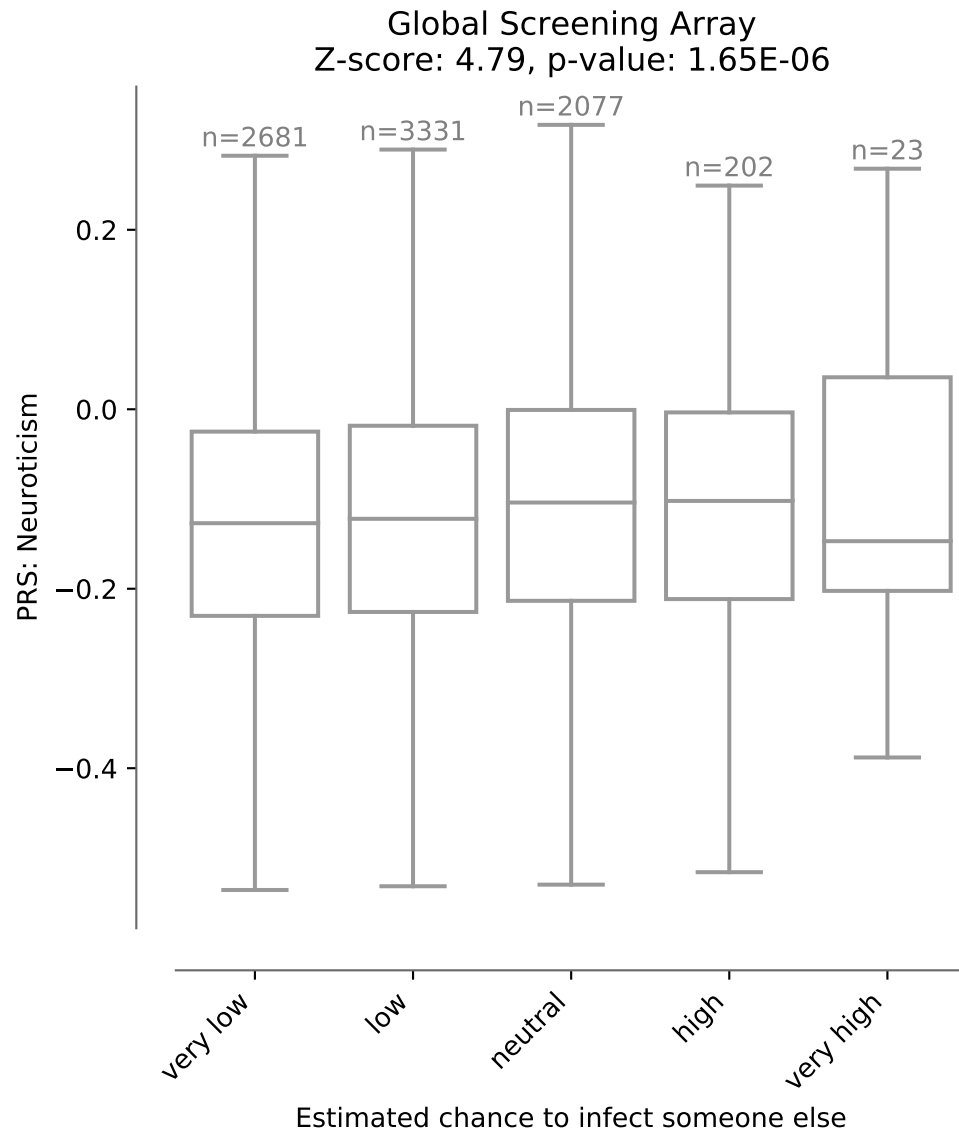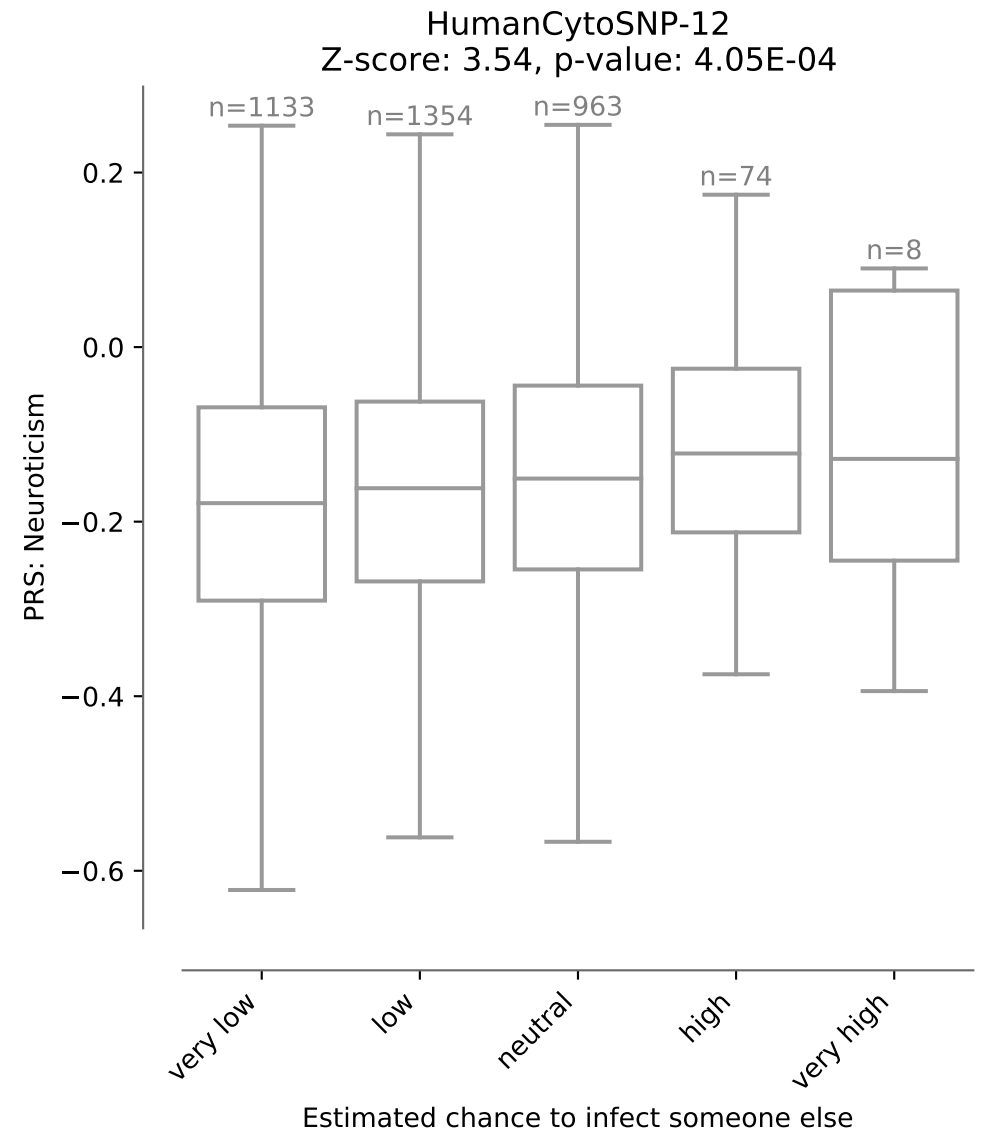

Estimated chance to become infected  
PGS: Educational attainment  
Meta analysis Z-score: -6.21, p-value: 5.46E-10

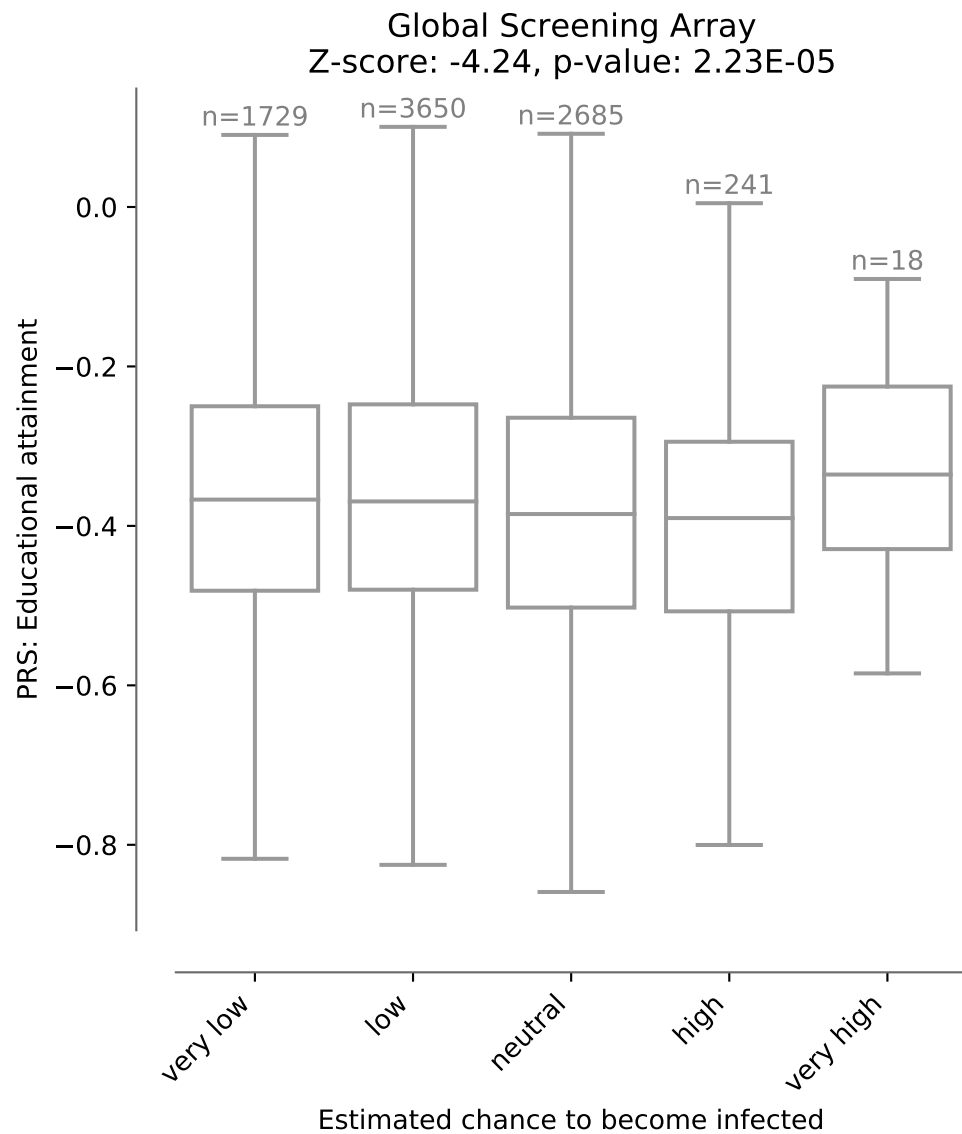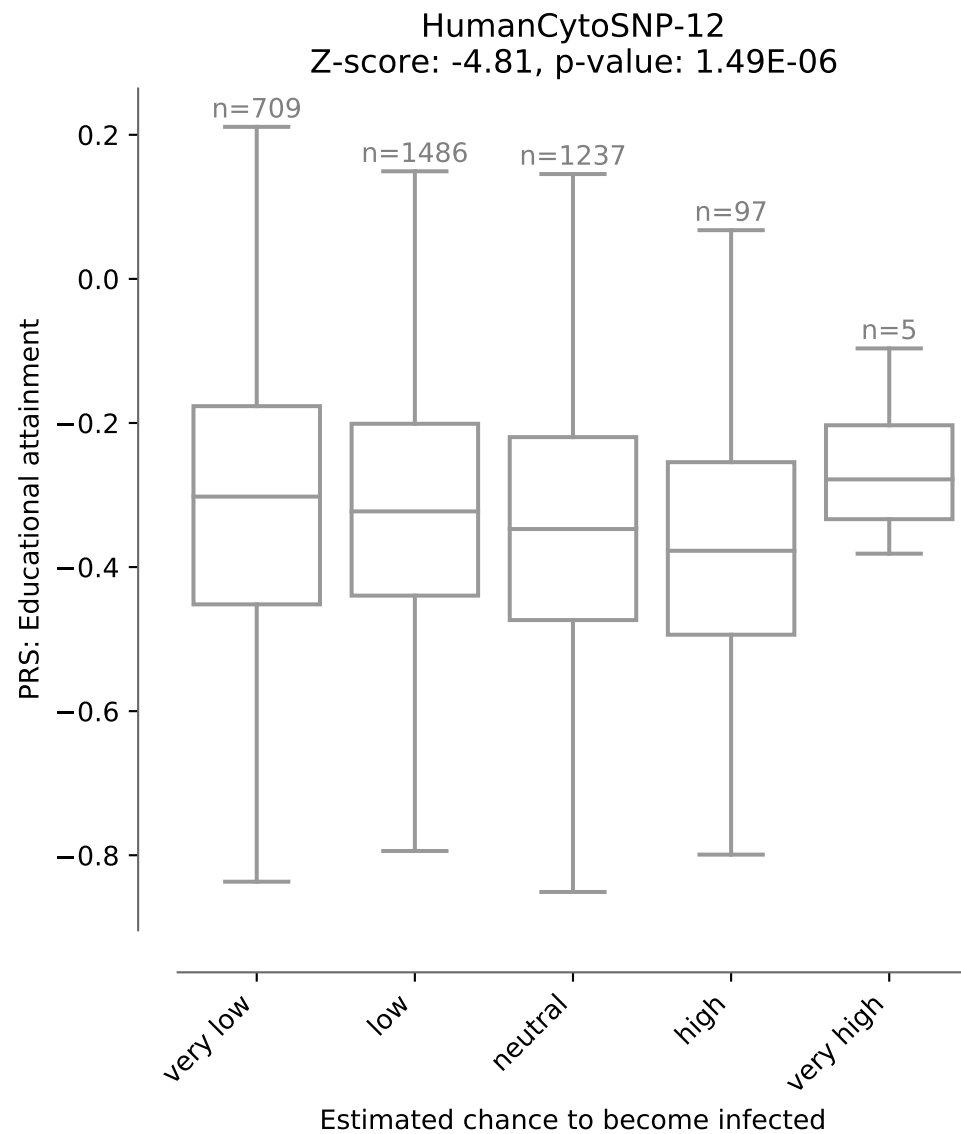

Estimated chance to become infected  
PGS: Neuroticism  
Meta analysis Z-score: 6.83, p-value: 8.79E-12

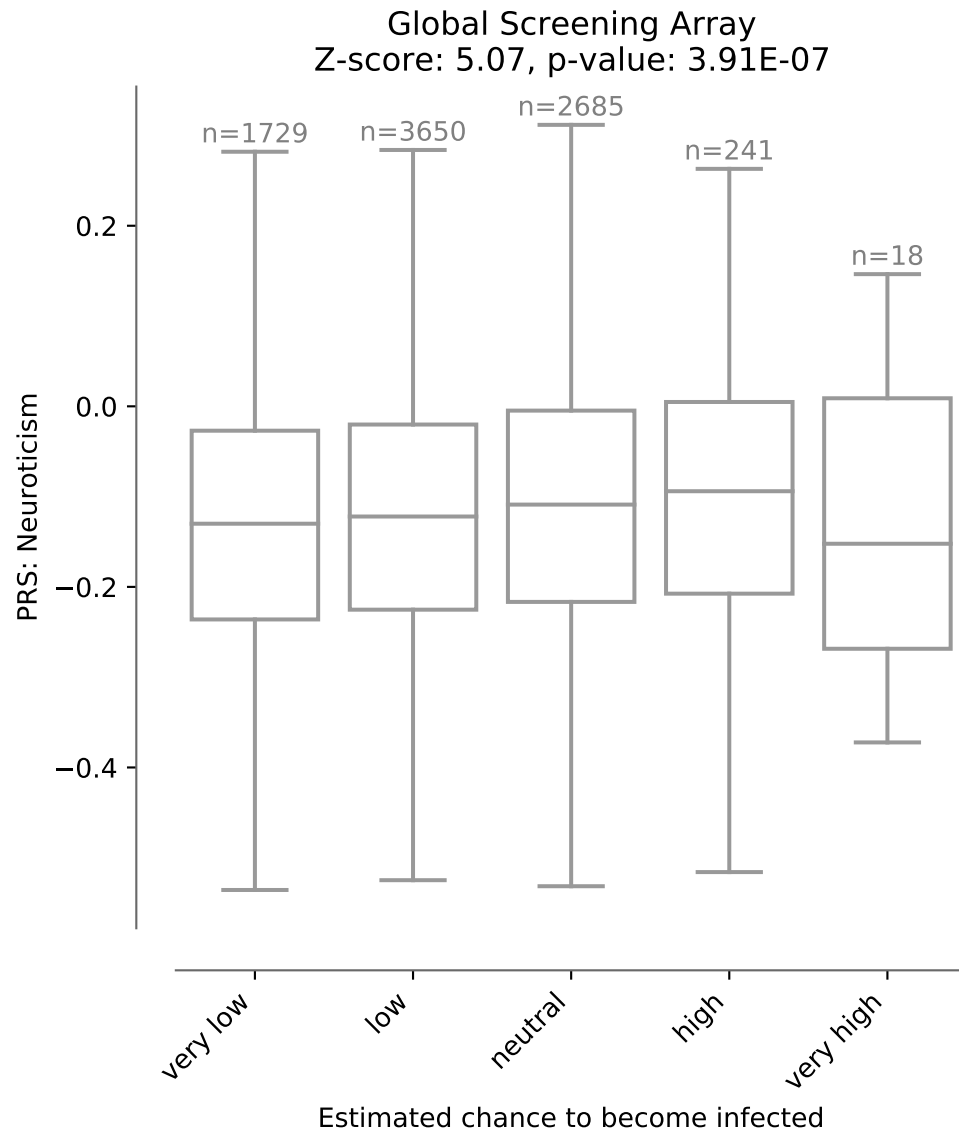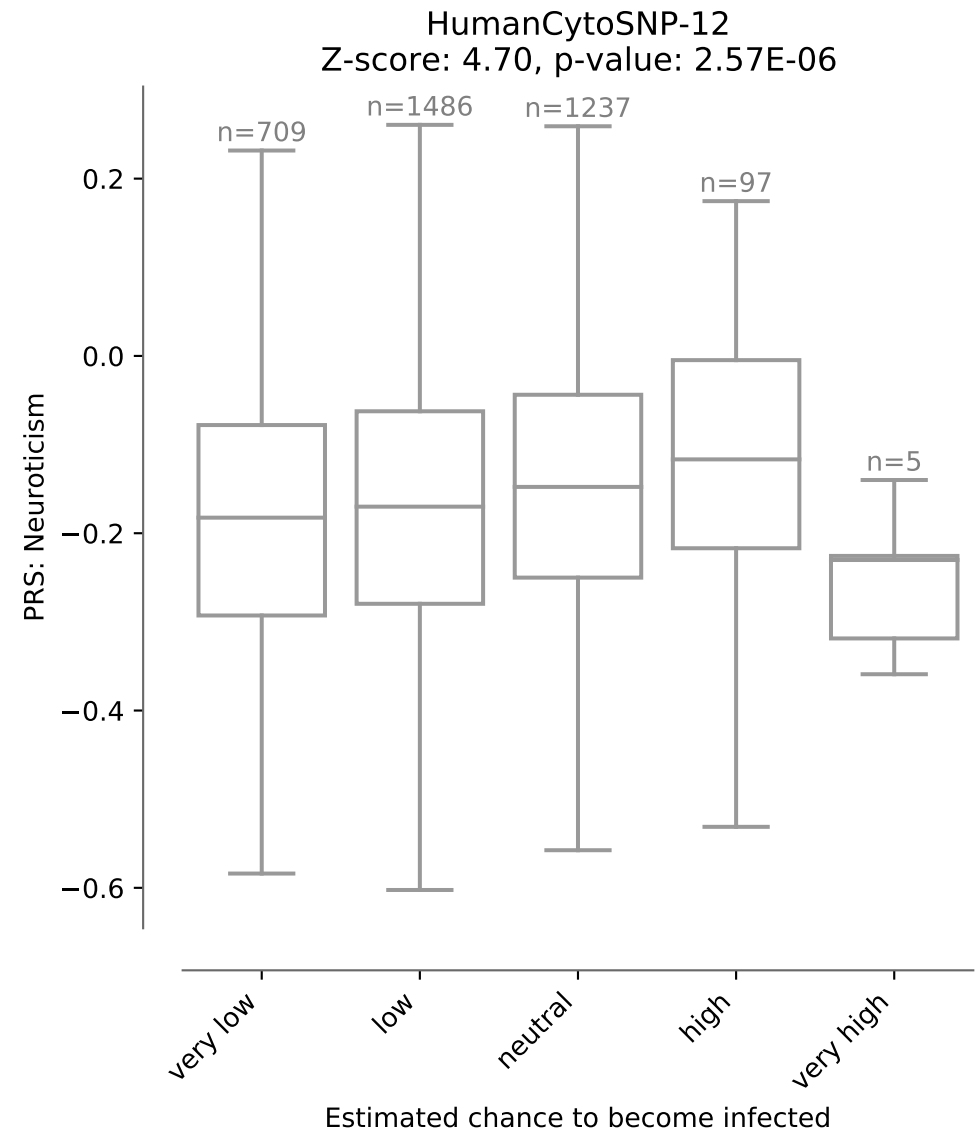

Finding the government does not take economic interests sufficiently into account during the corona crisis

PGS: Educational attainment

Meta analysis Z-score: -7.62, p-value: 2.53E-14

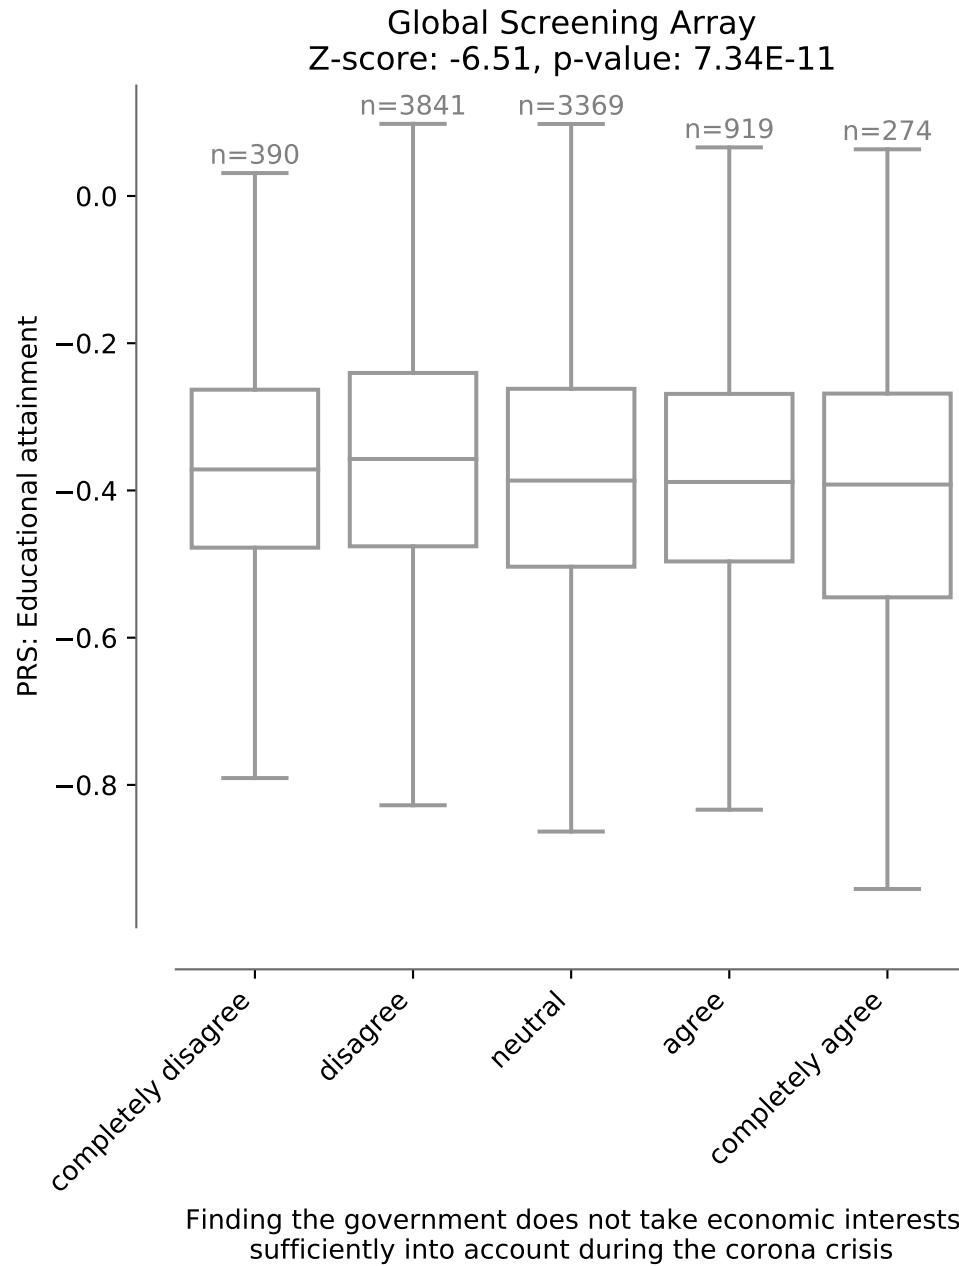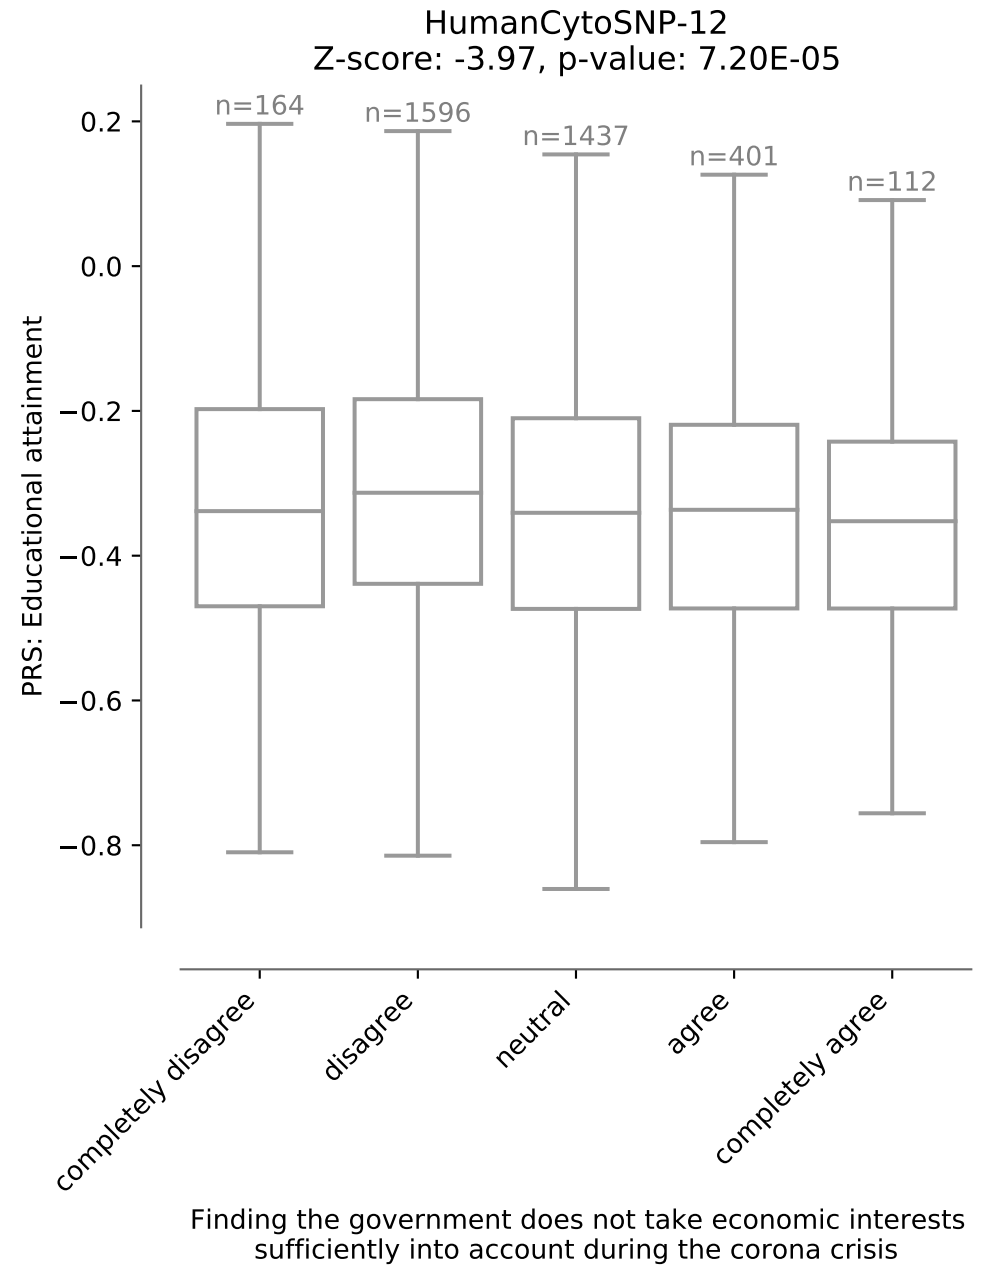



Finding that the government must act tougher to reduce the number of infections

PGS: BMI

Meta analysis Z-score: 6.19, p-value: 5.99E-10

Global Screening Array  
Z-score: 4.40, p-value: 1.08E-05

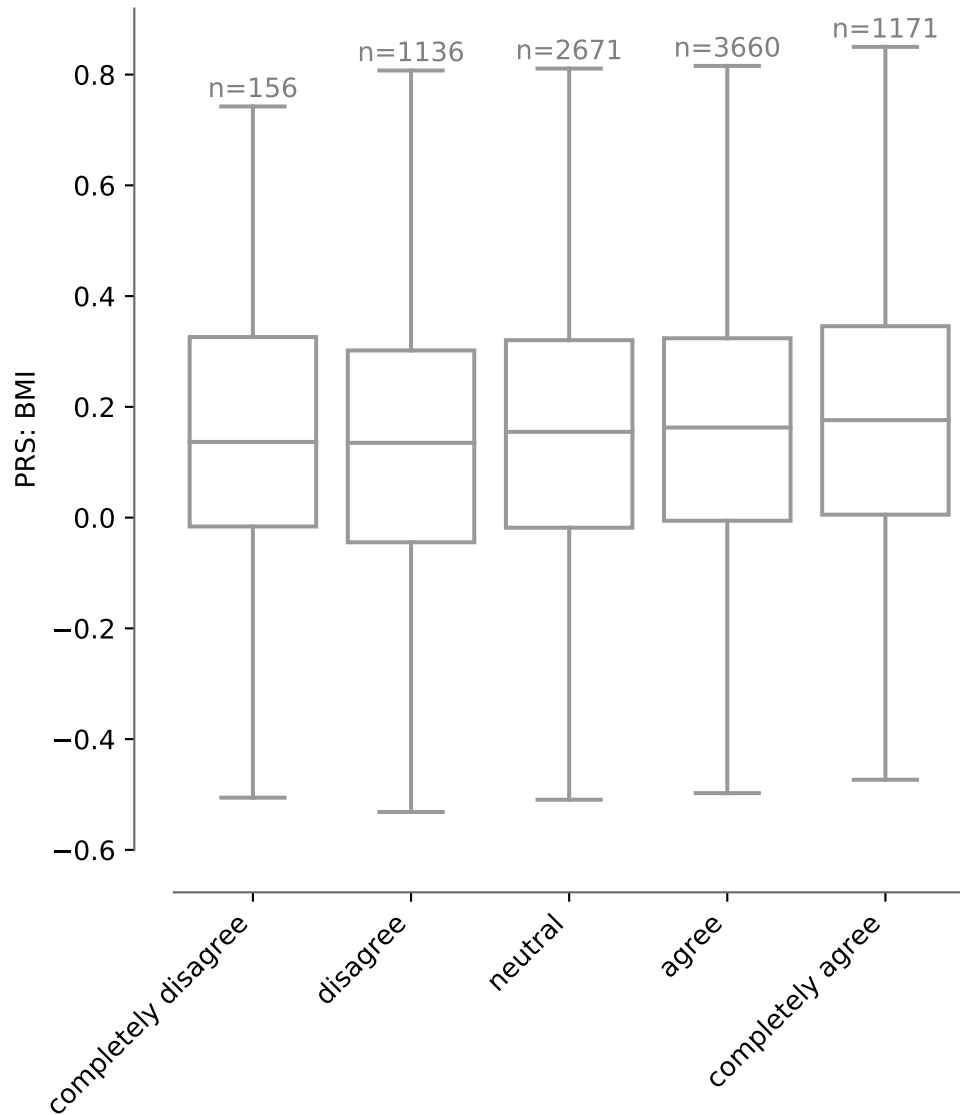

Finding that the government must act tougher to reduce the number of infections

HumanCytoSNP-12  
Z-score: 4.59, p-value: 4.38E-06

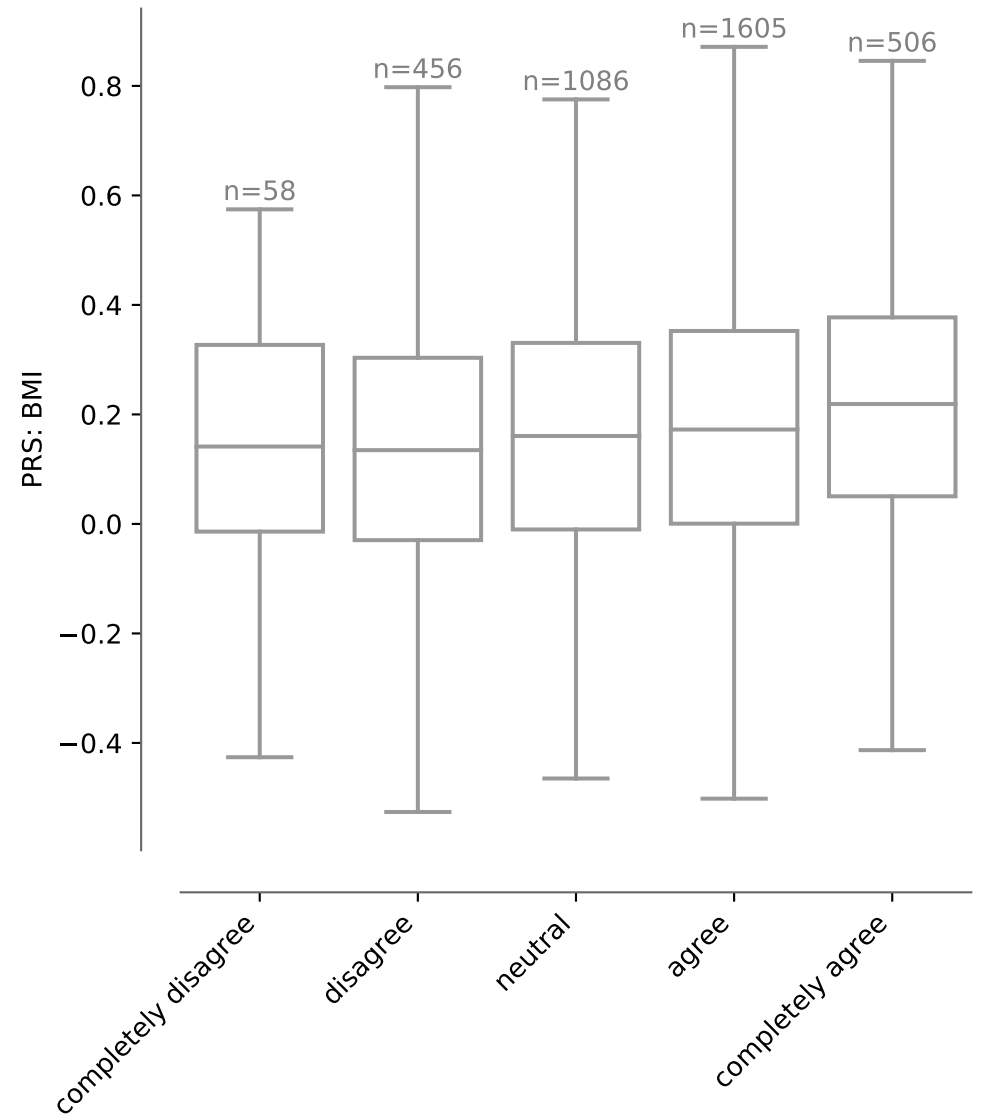

Finding that the government must act tougher to reduce the number of infections

Finding that the government must act tougher to reduce the number of infections

PGS: Educational attainment

Meta analysis Z-score: -11.35, p-value: 7.33E-30

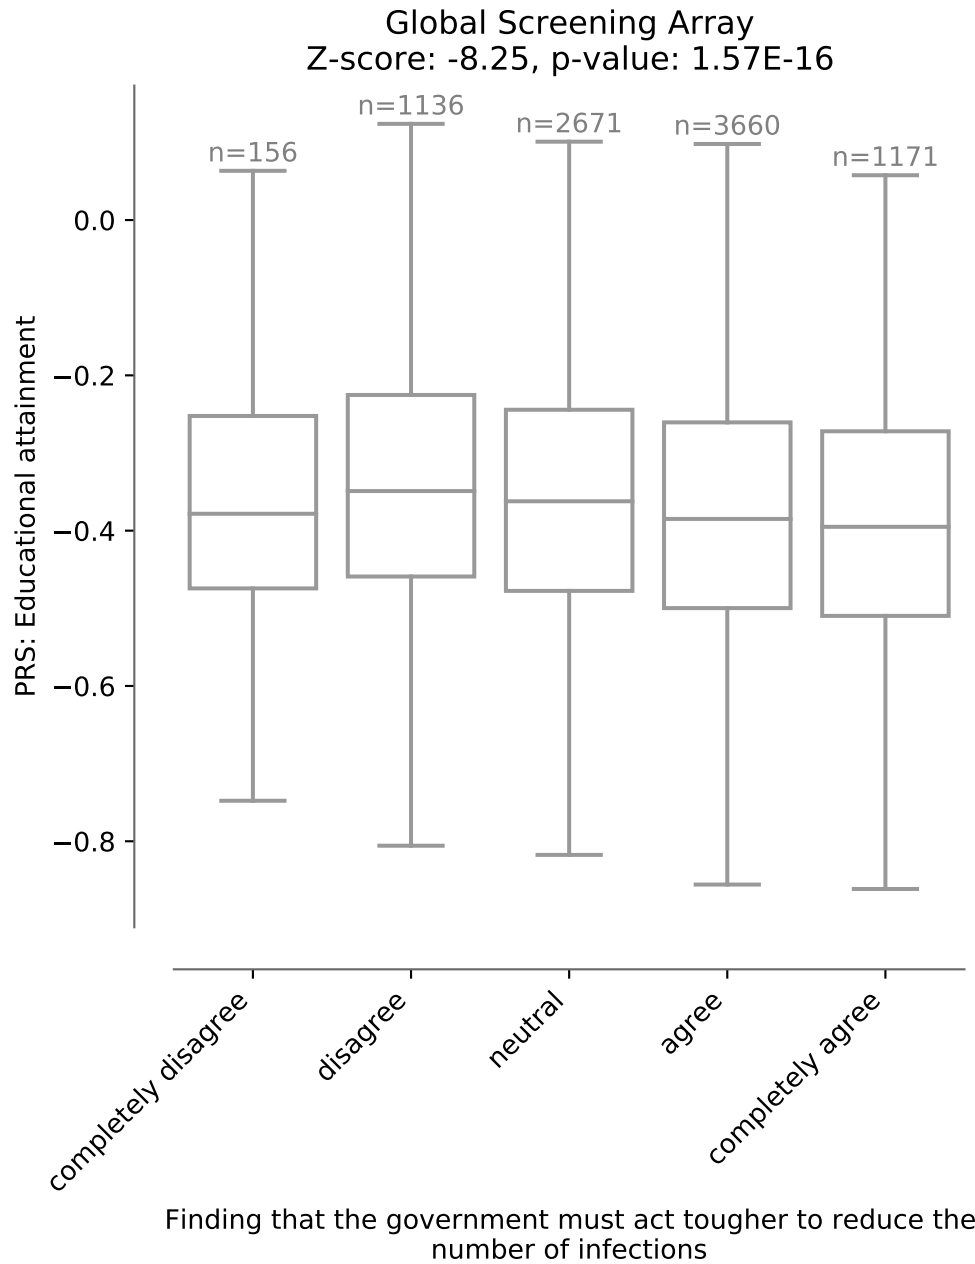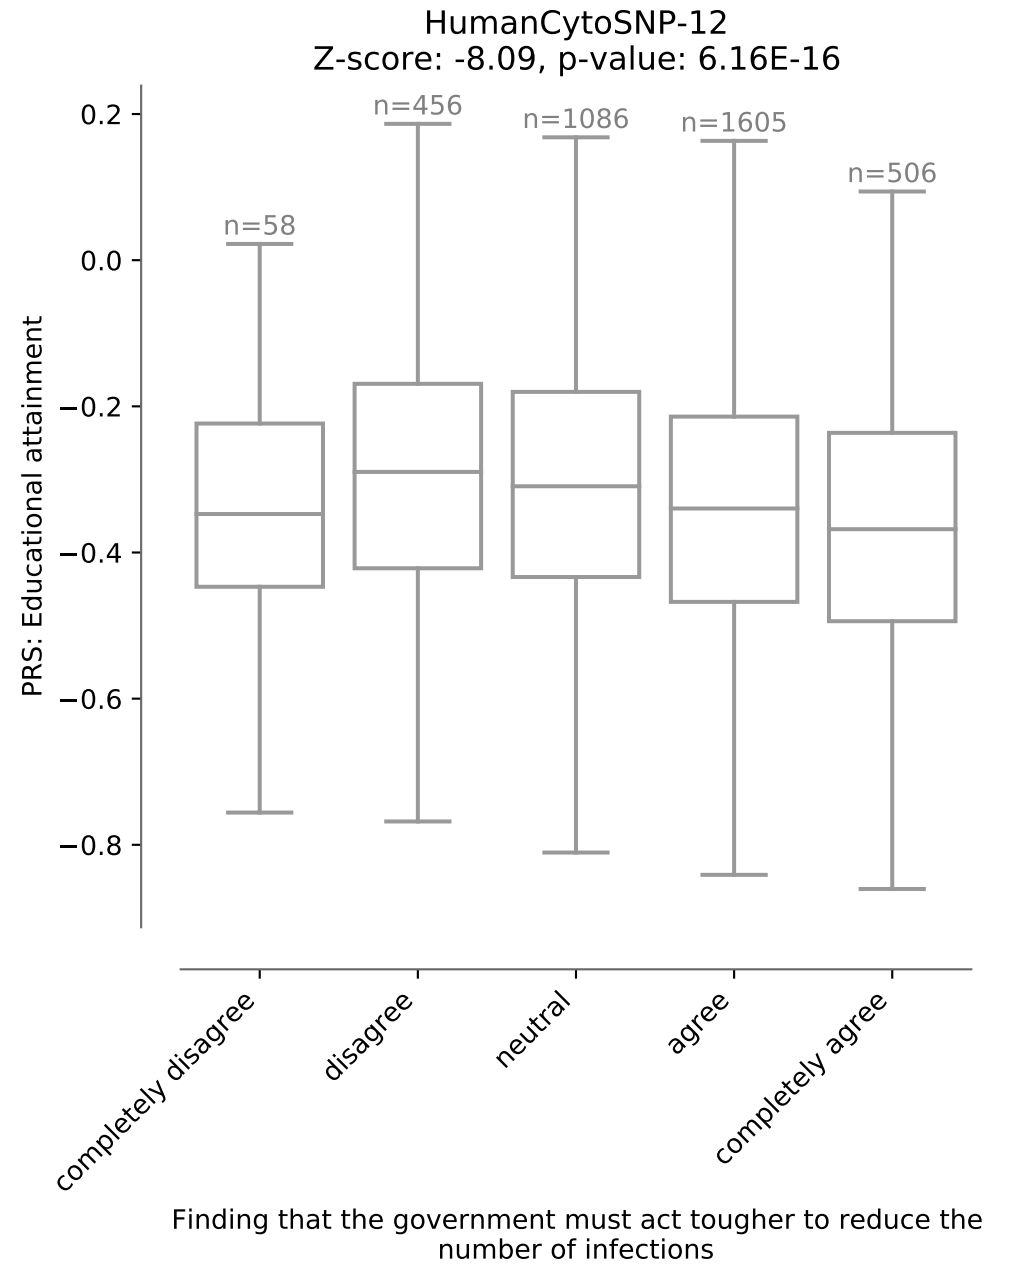

Finding that the government must act tougher to reduce the number of infections

PGS: Neuroticism

Meta analysis Z-score: 4.76, p-value: 1.91E-06

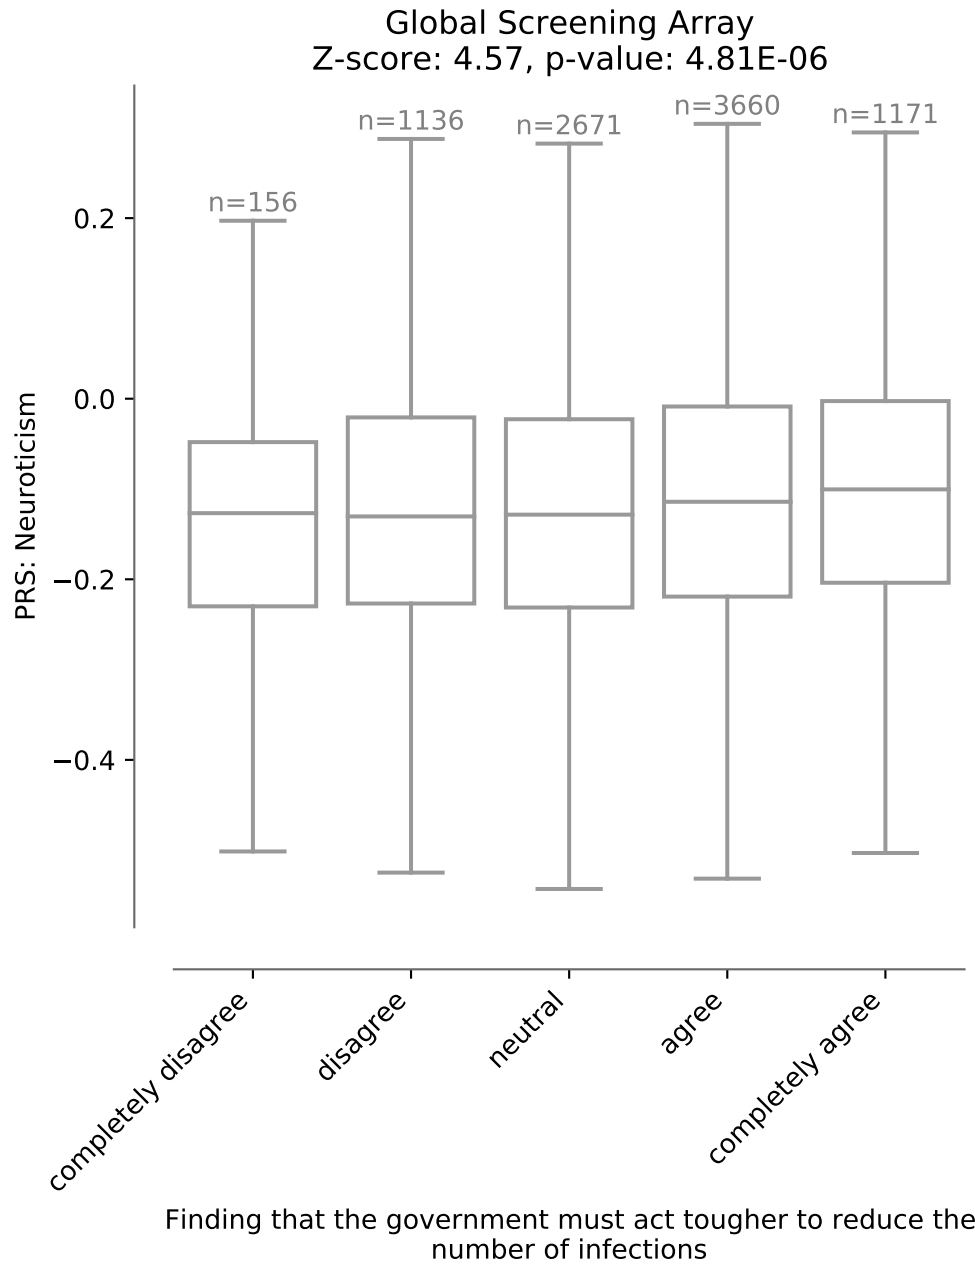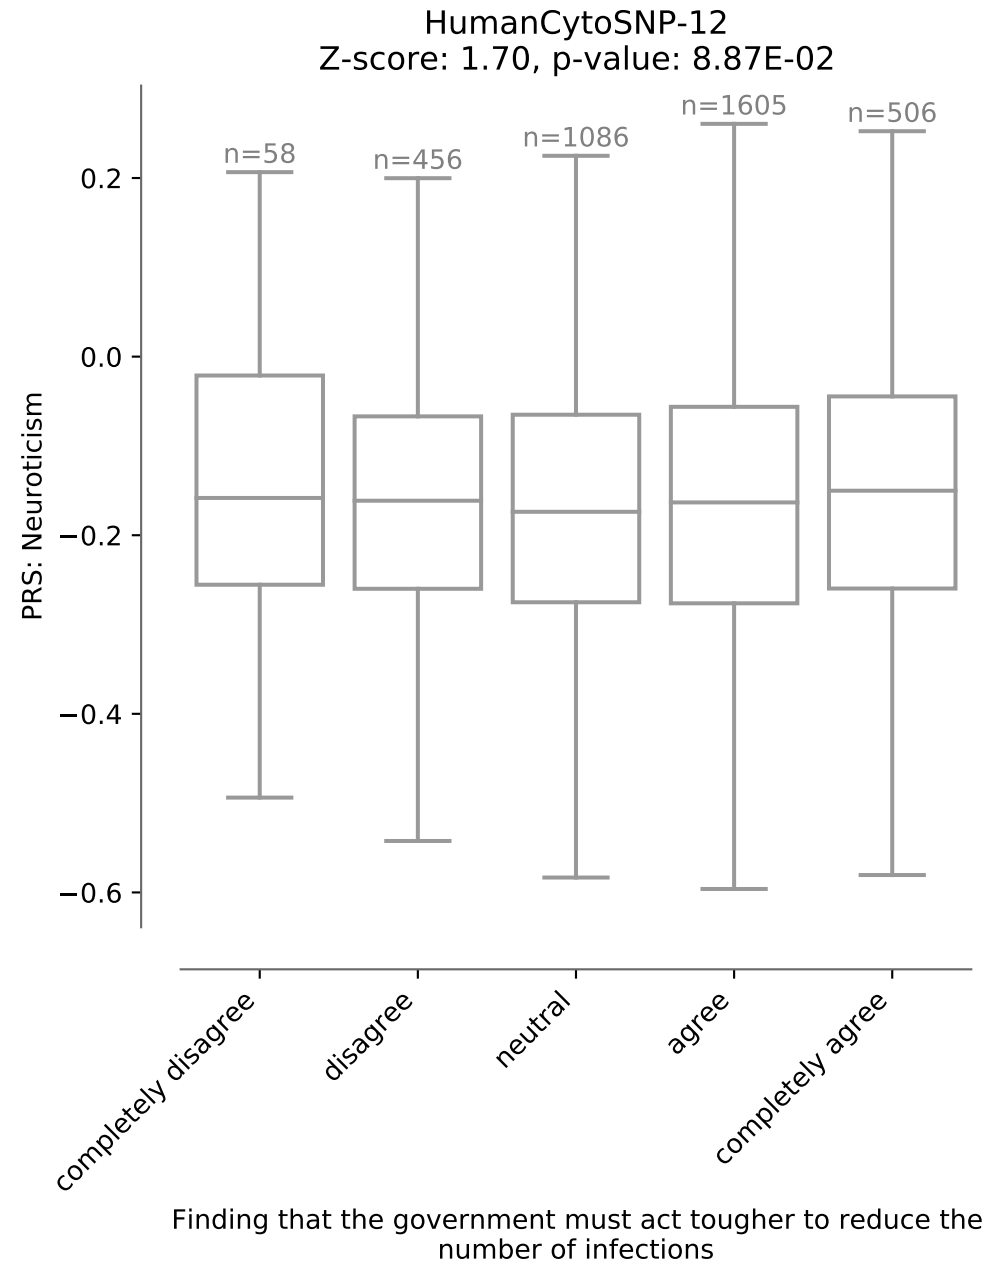

Having done volunteer work  
PGS: Educational attainment  
Meta analysis Z-score: 11.22, p-value: 3.24E-29

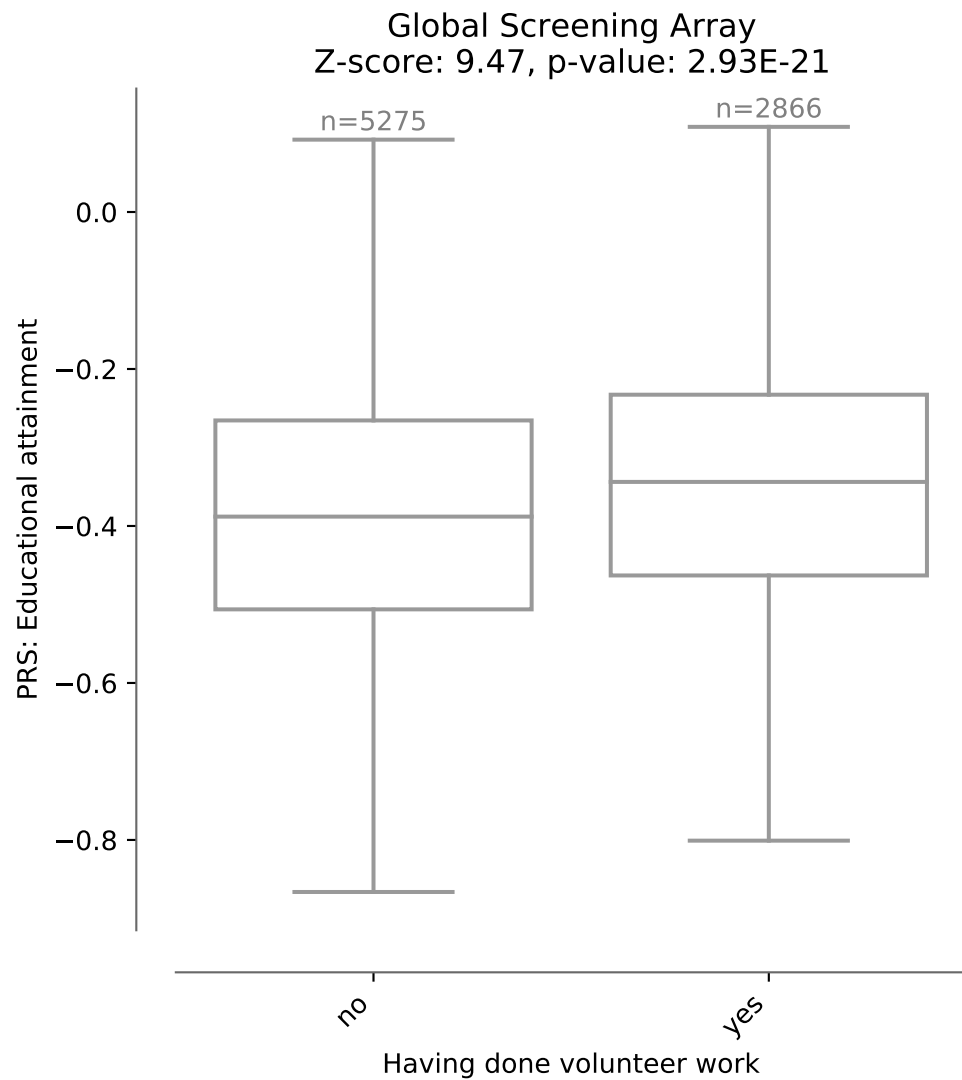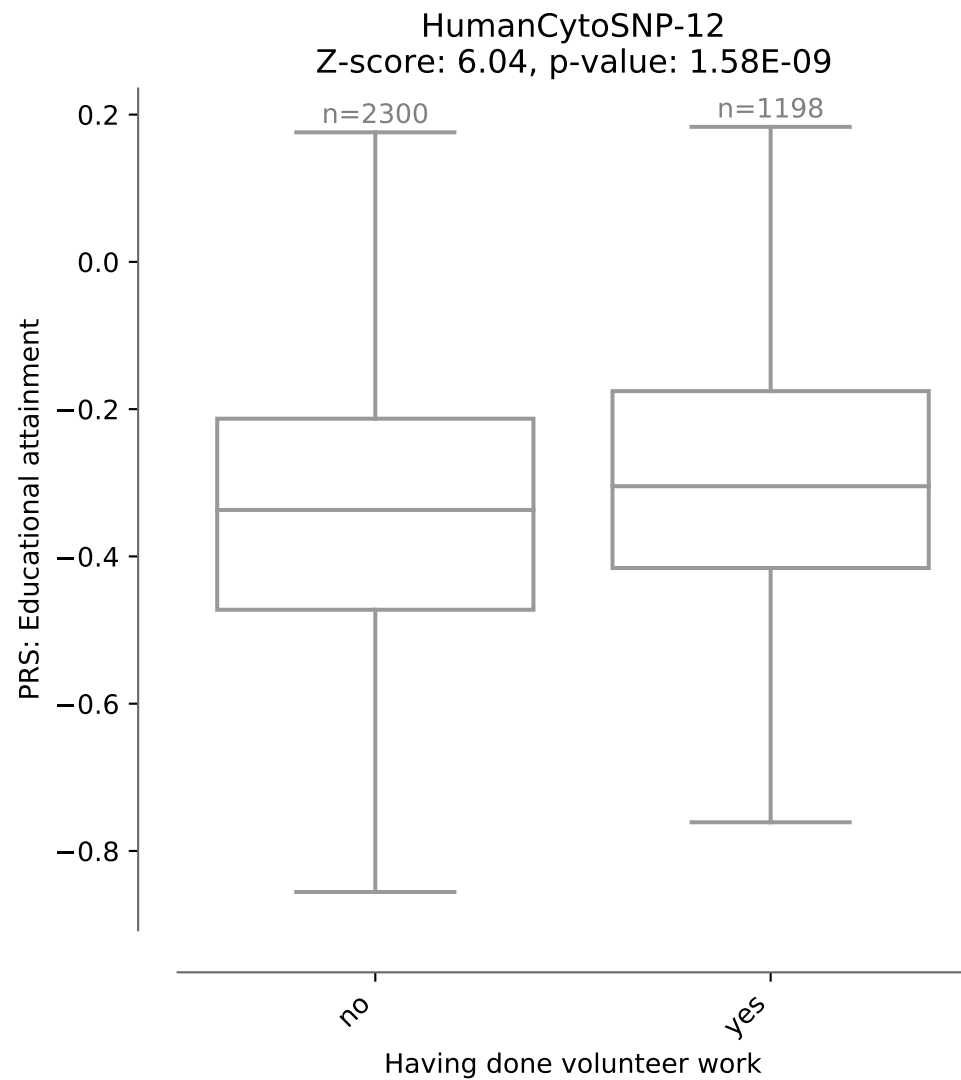

Having done volunteer work  
PGS: Life satisfaction  
Meta analysis Z-score: 5.41, p-value: 6.25E-08

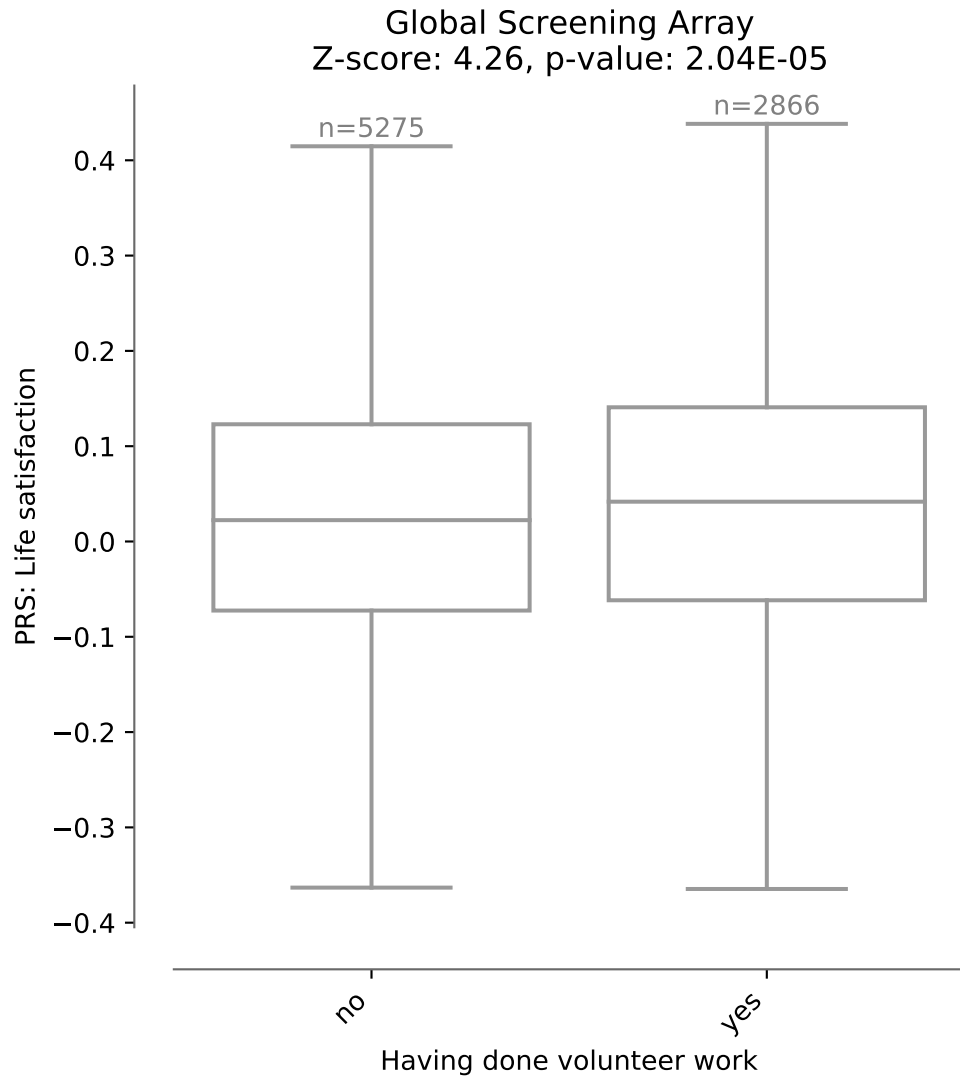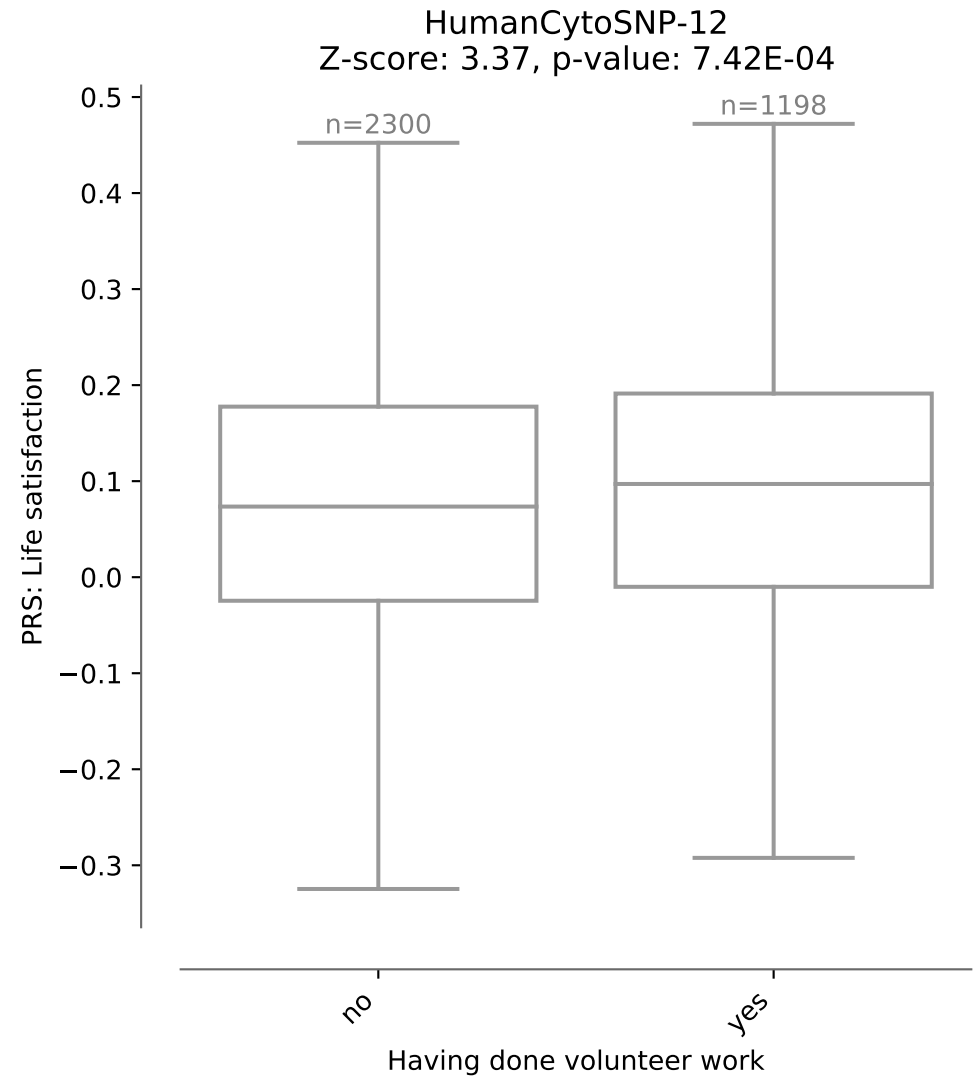

Having done volunteer work  
PGS: Neuroticism  
Meta analysis Z-score: -5.31, p-value: 1.09E-07

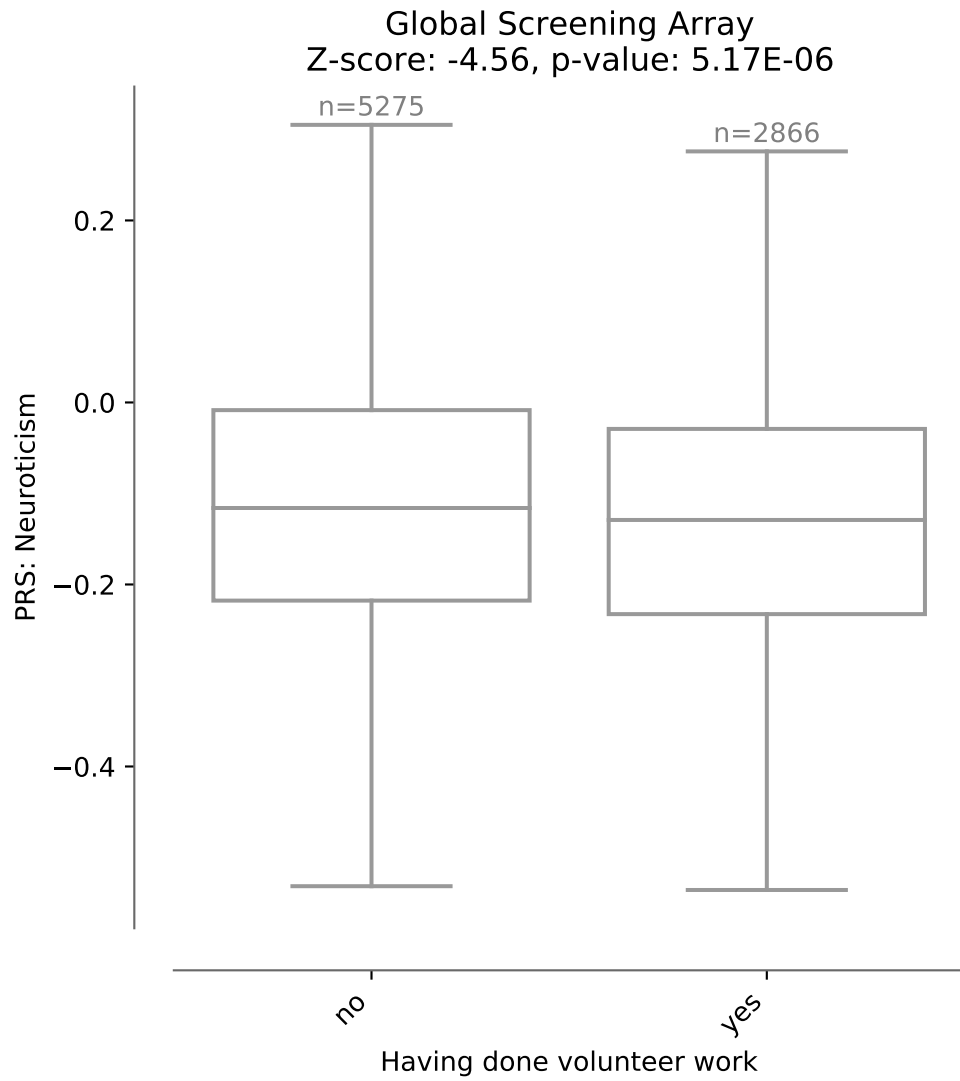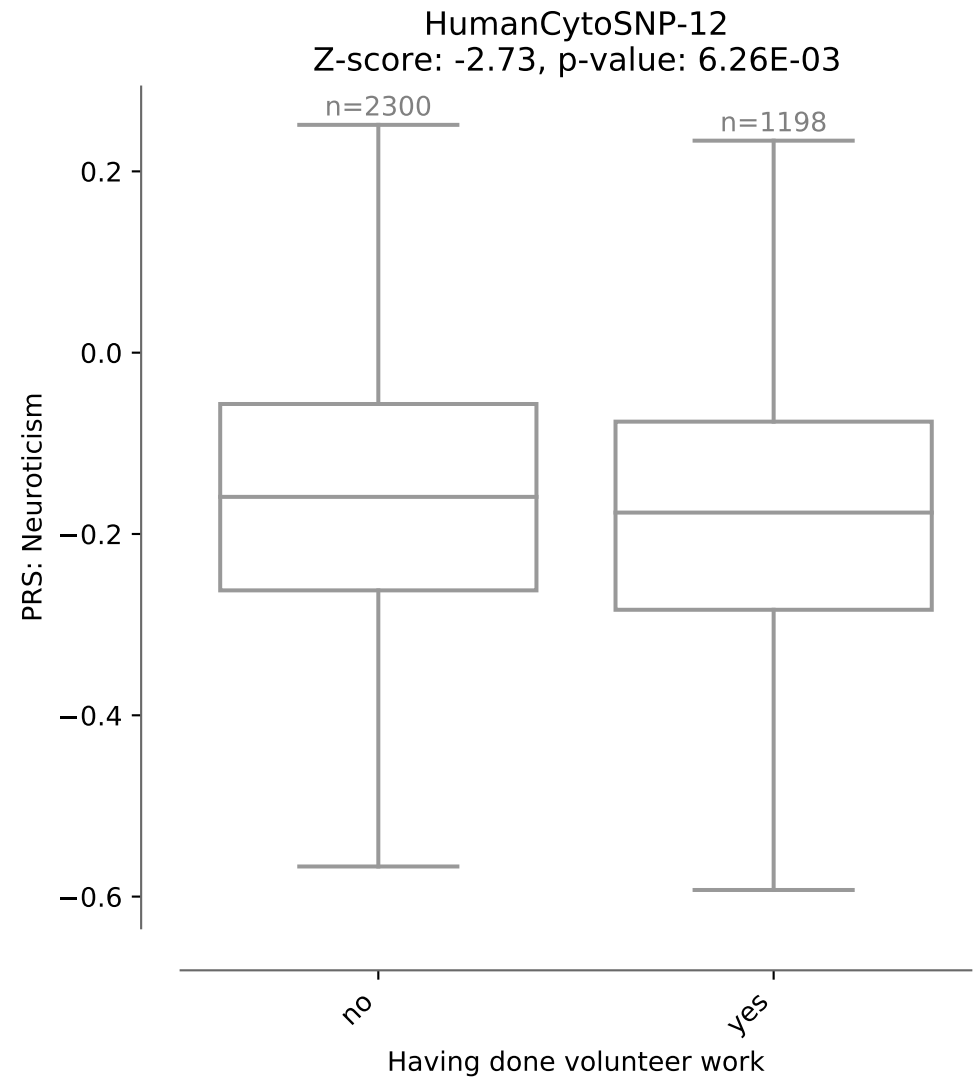

Had dizziness  
PGS: Depression  
Meta analysis Z-score: 4.69, p-value: 2.72E-06

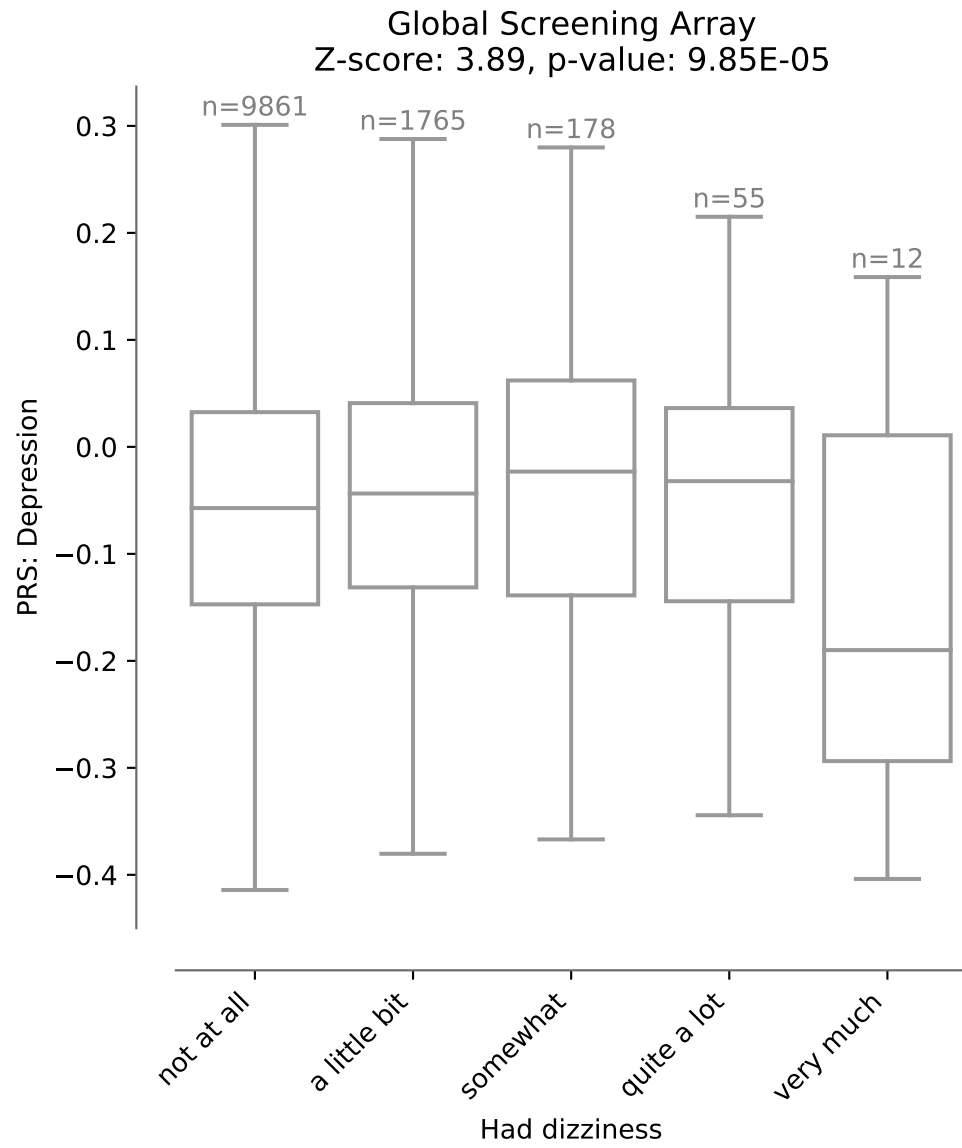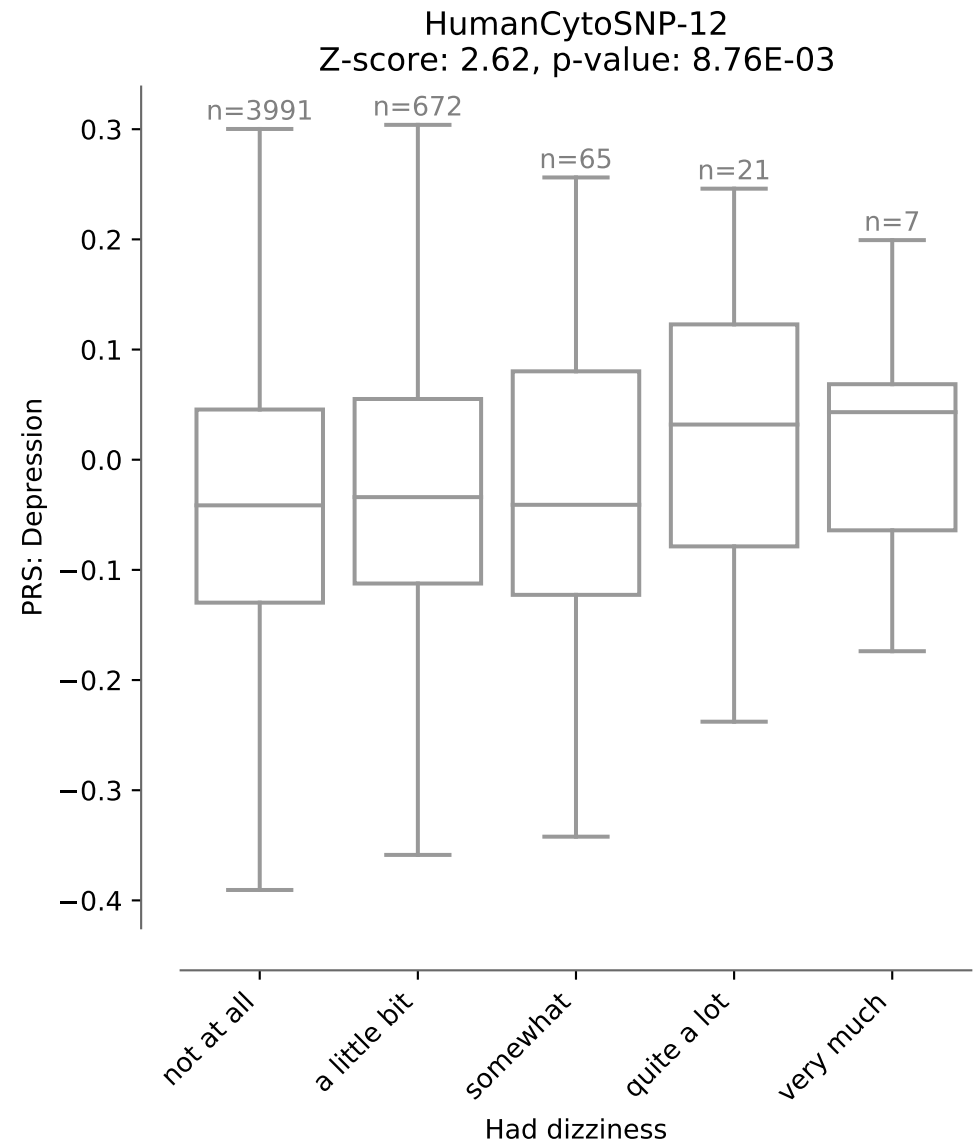

Had dizziness  
PGS: Life satisfaction  
Meta analysis Z-score: -6.59, p-value: 4.53E-11

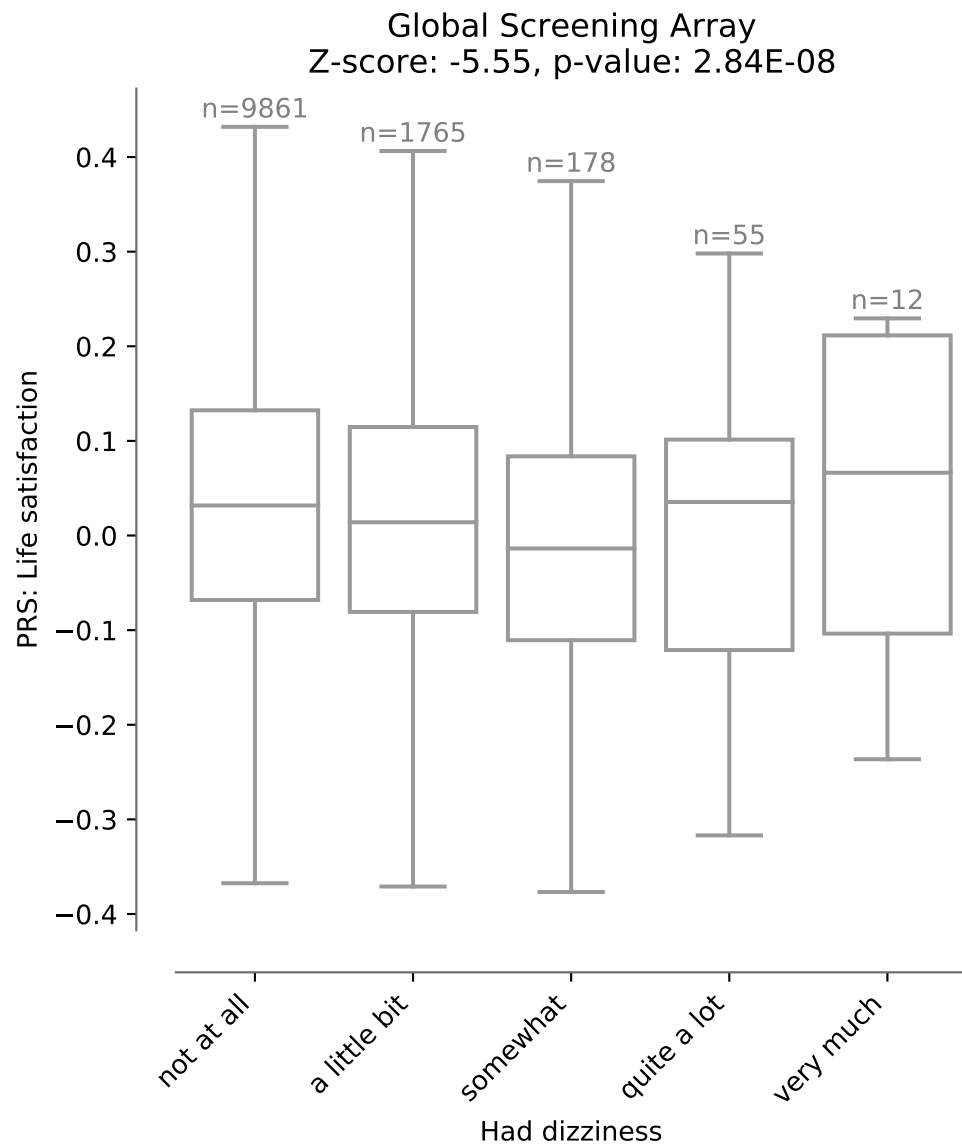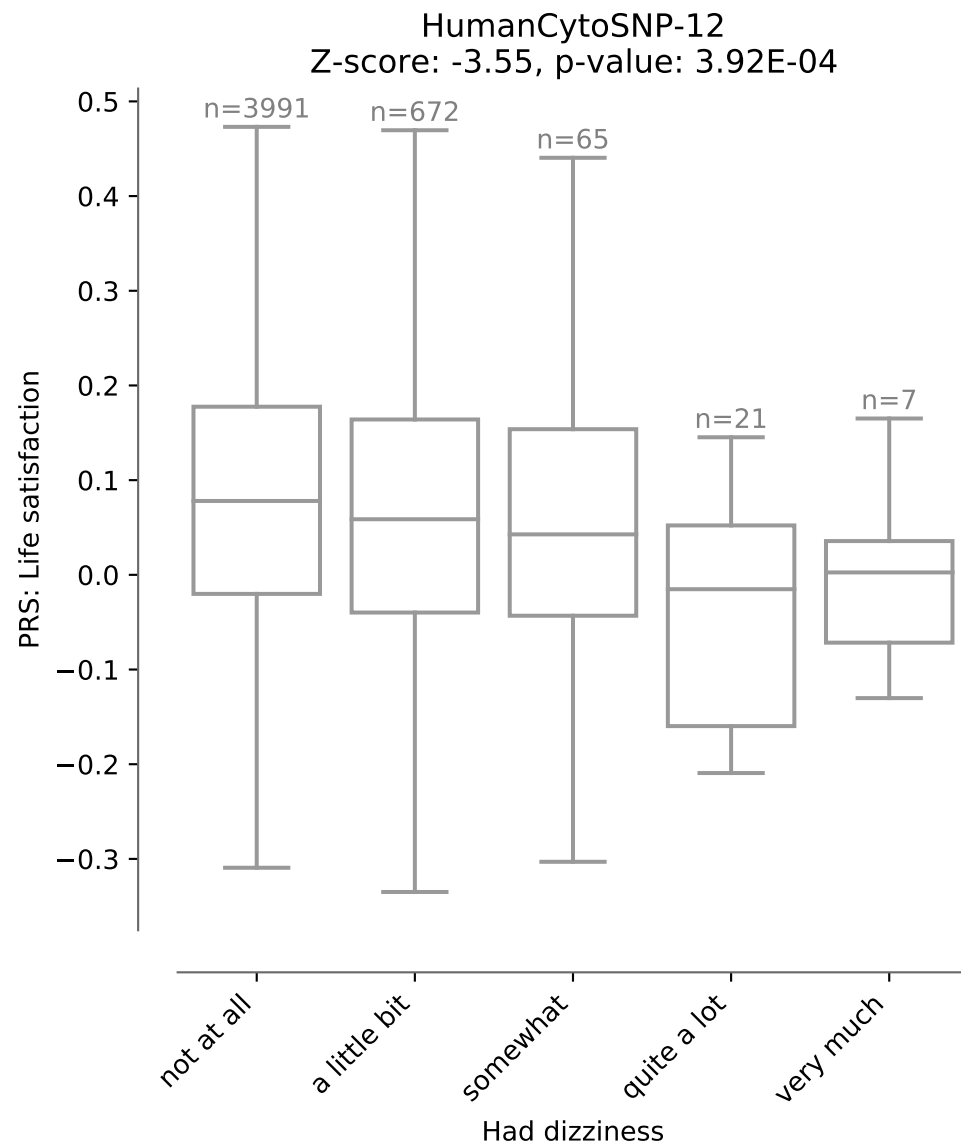



Had dizziness  
PGS: Neuroticism  
Meta analysis Z-score: 6.50, p-value: 7.85E-11

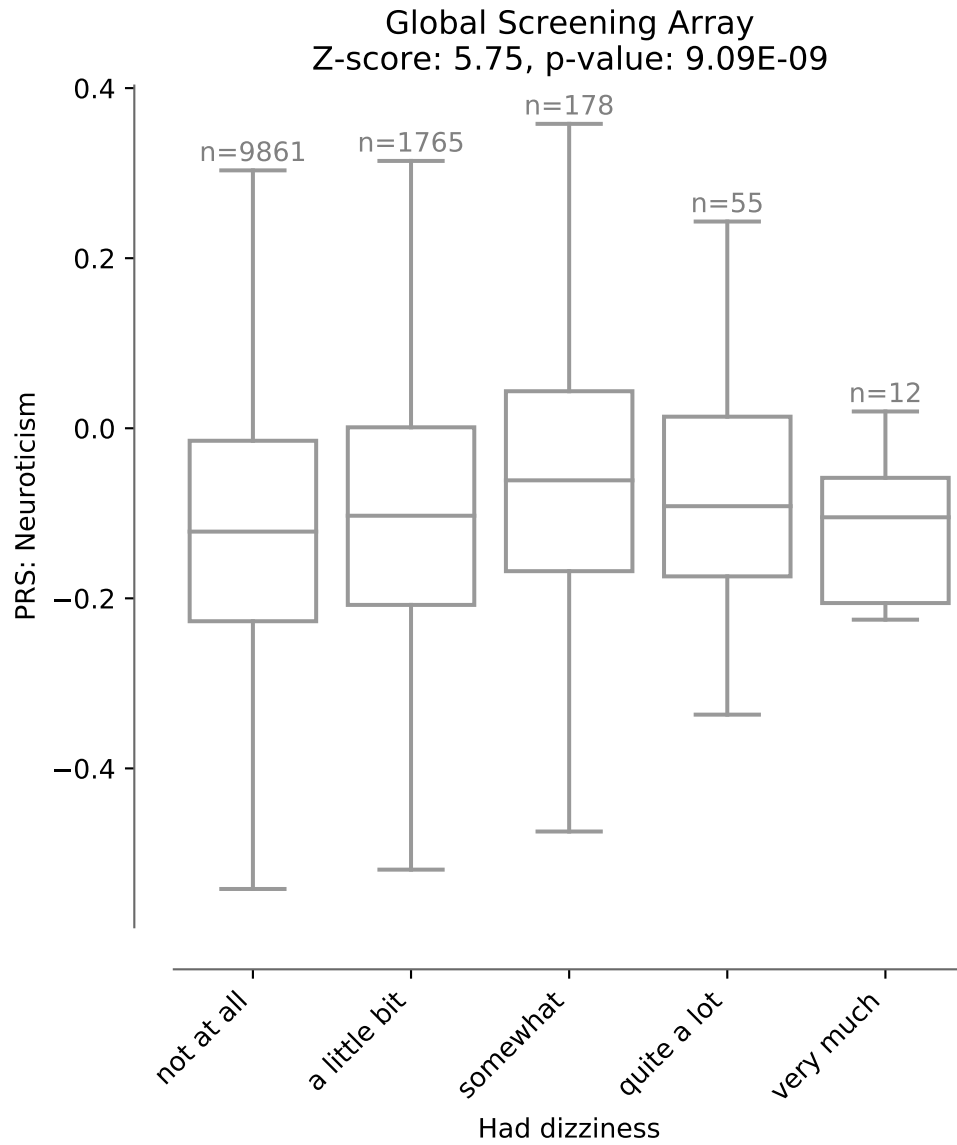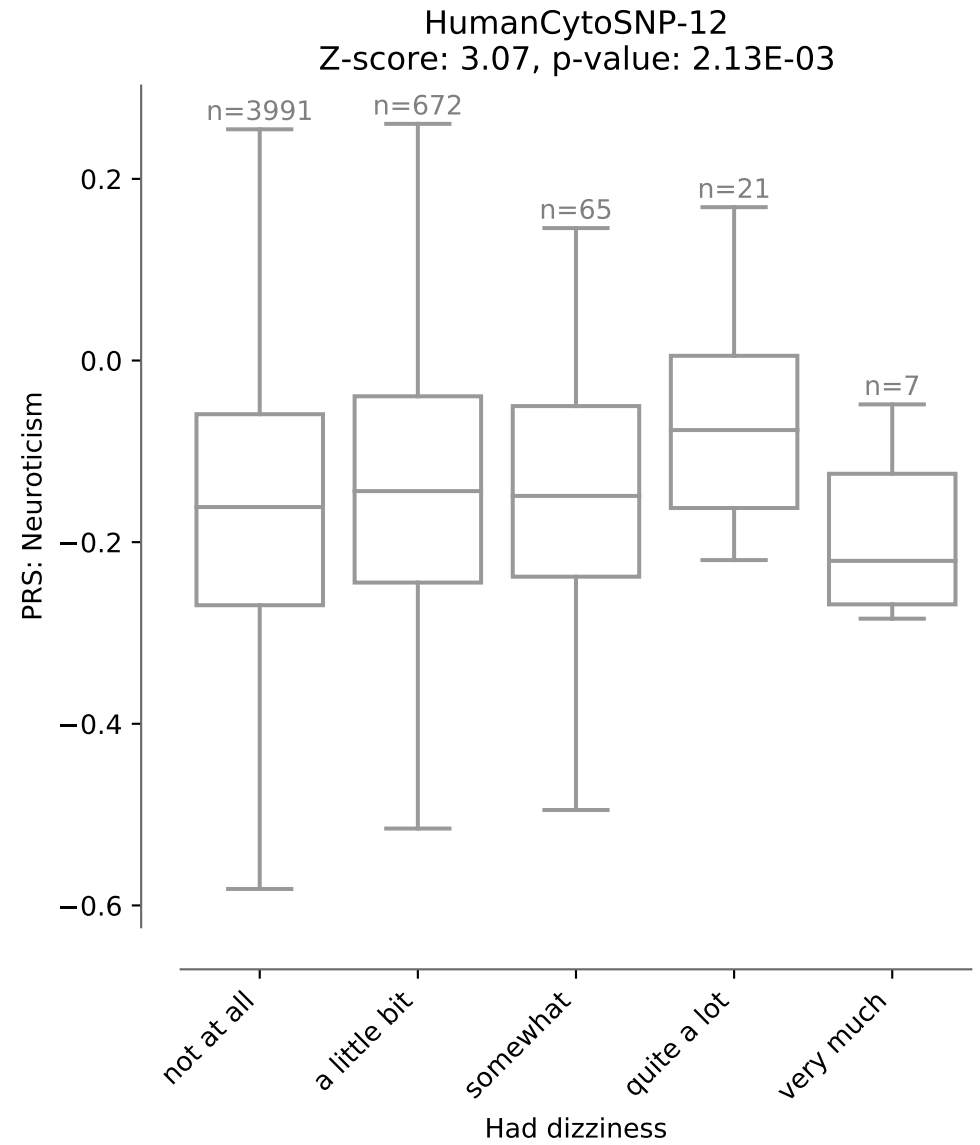

Had lump in throat  
PGS: Life satisfaction  
Meta analysis Z-score: -4.68, p-value: 2.83E-06

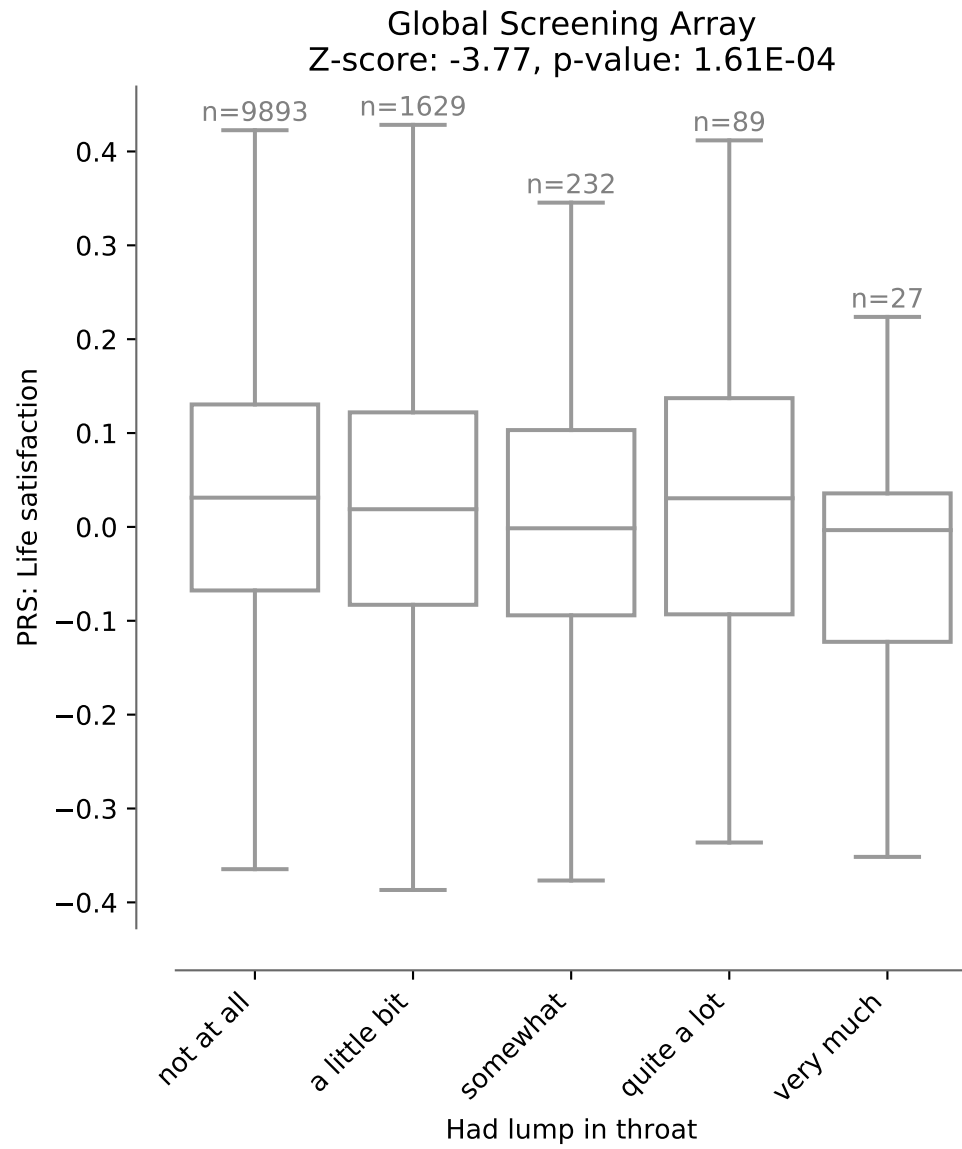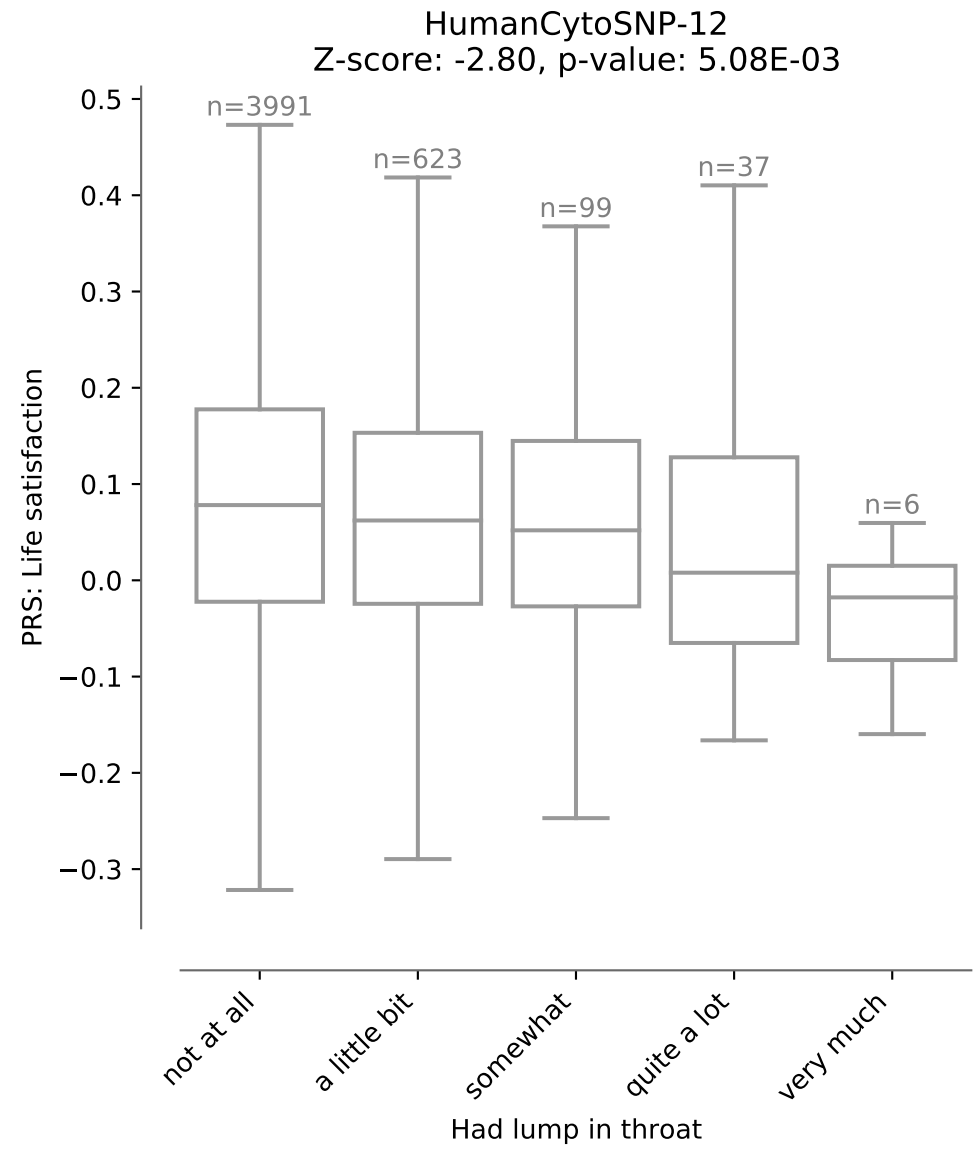

Finding that measures must be taken to reduce the number of infections among young people

PGS: Educational attainment

Meta analysis Z-score: -9.07, p-value: 1.17E-19

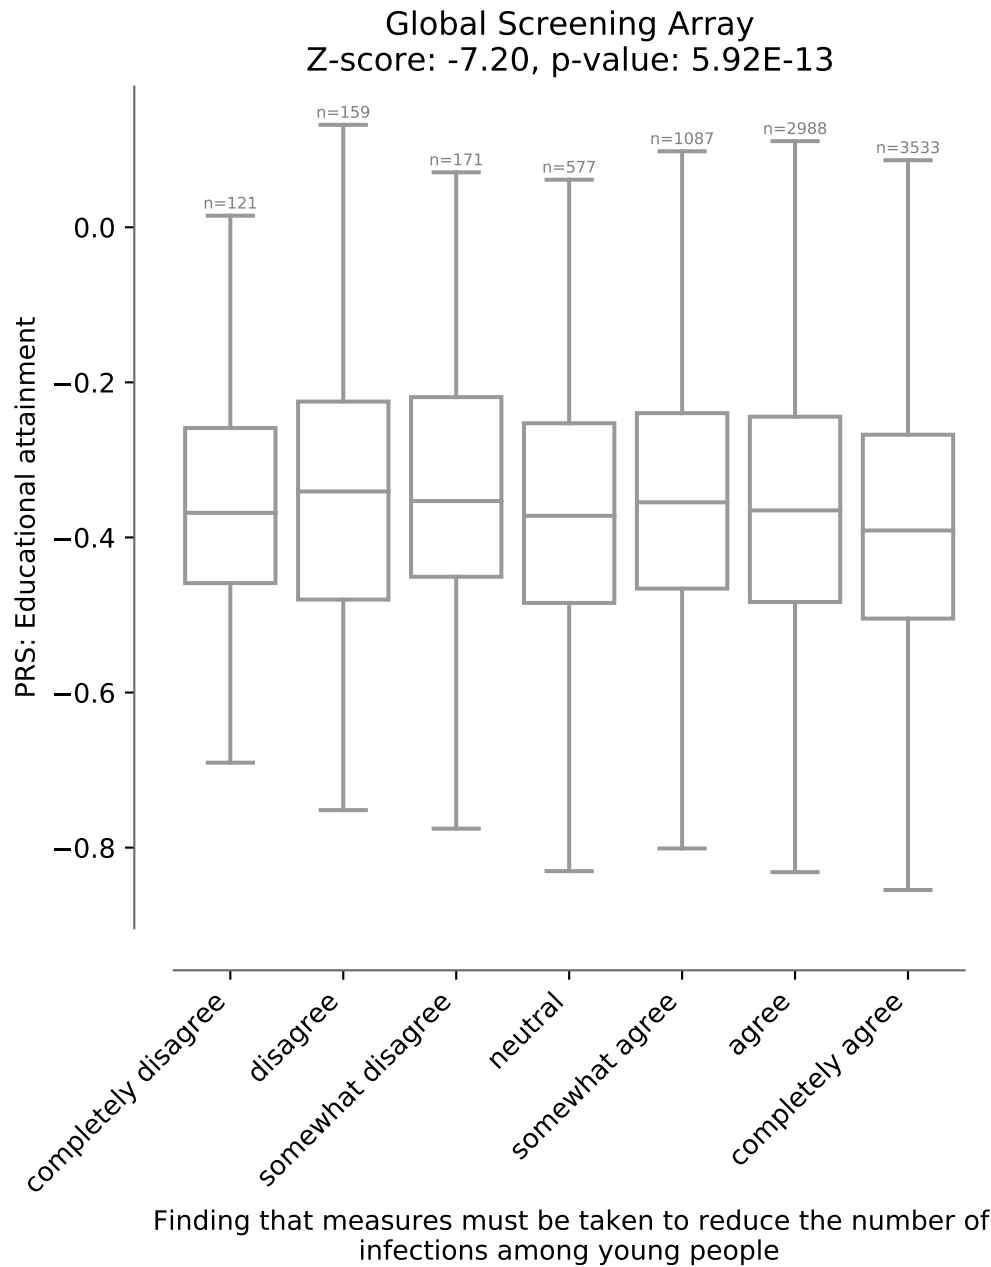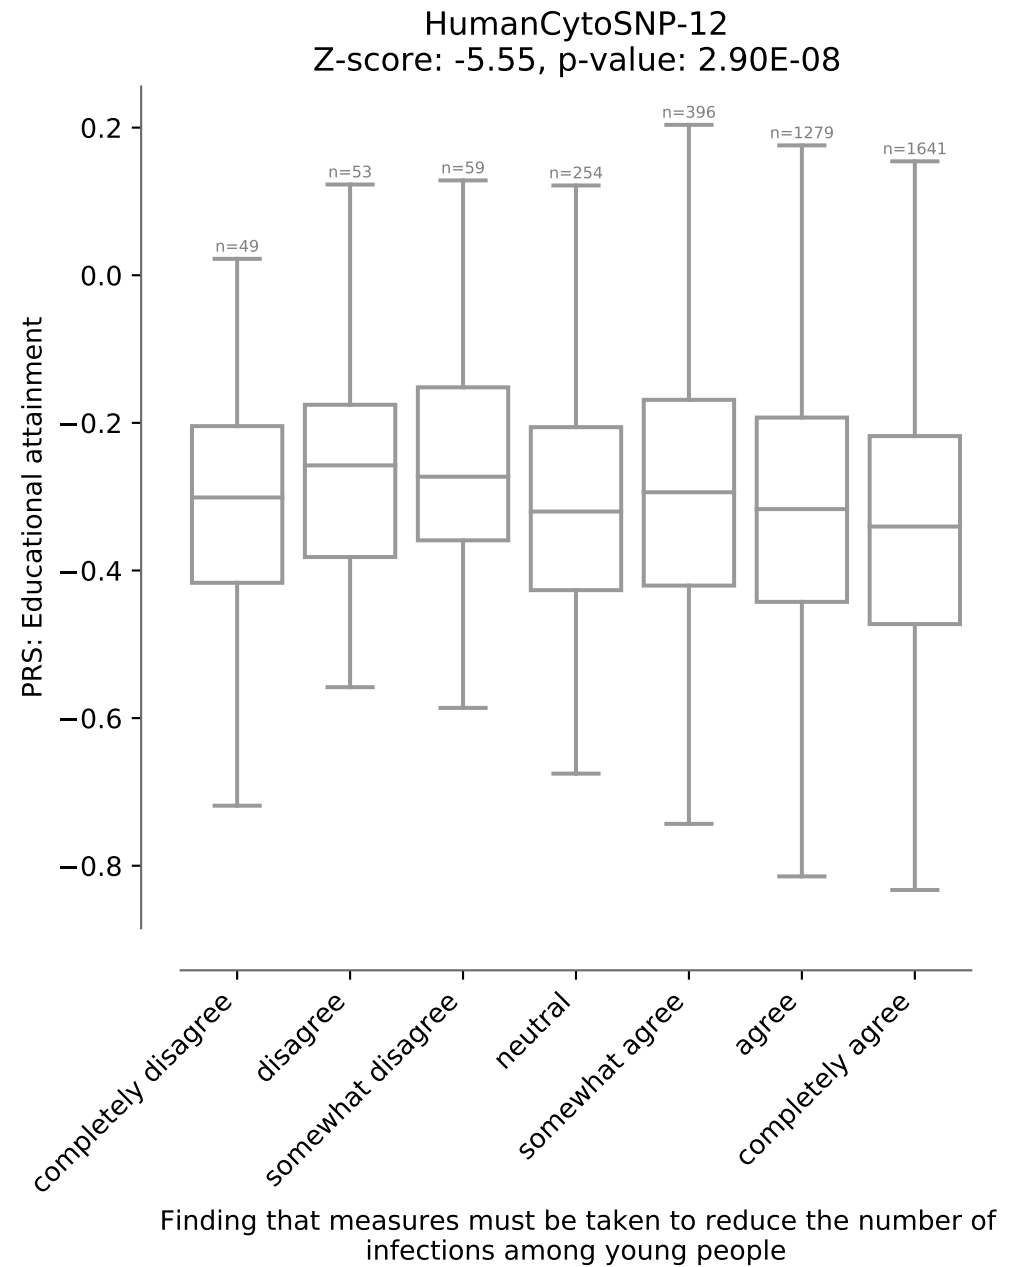

Finding companies should be protected from going bankrupt at all cost

PGS: Educational attainment

Meta analysis Z-score: -9.74, p-value: 2.06E-22

Global Screening Array  
Z-score: -7.22, p-value: 5.15E-13

HumanCytoSNP-12  
Z-score: -6.72, p-value: 1.84E-11

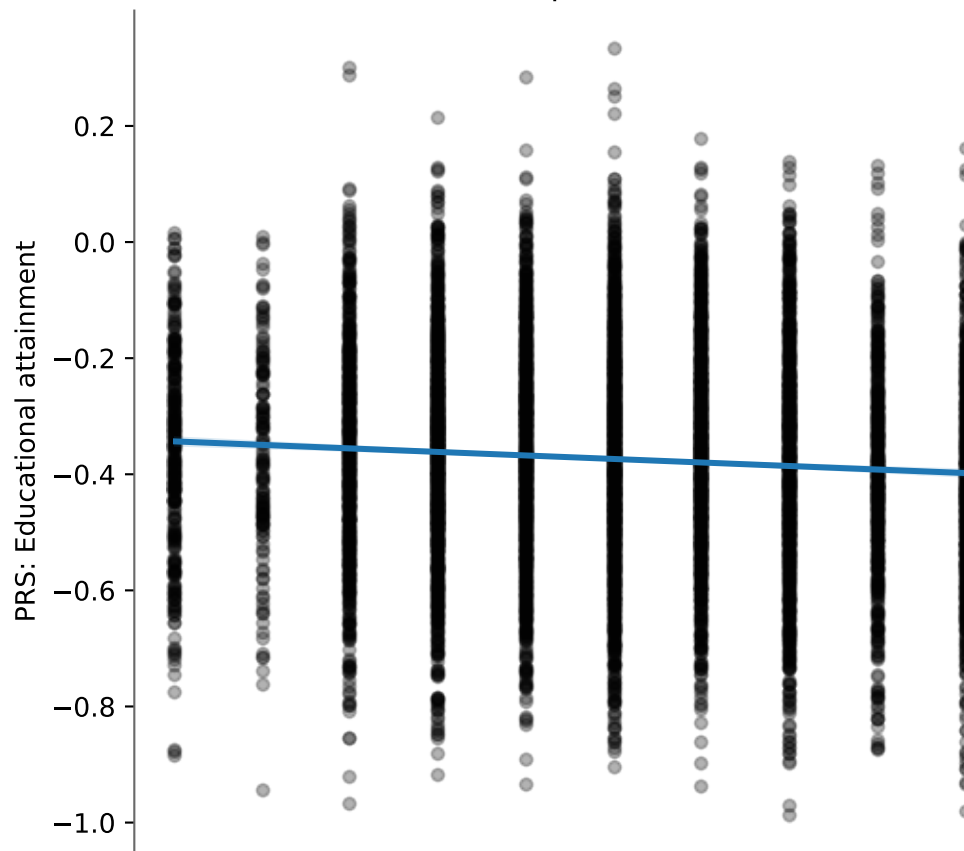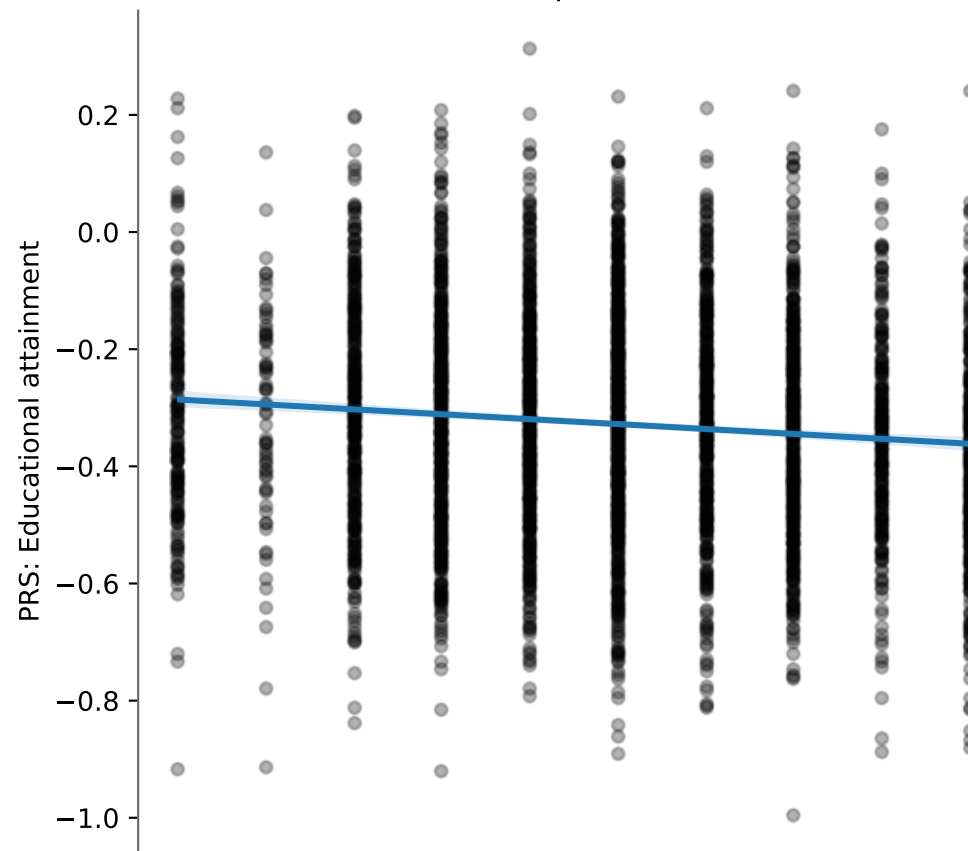

Finding companies should be protected from going bankrupt at all cost

Finding companies should be protected from going bankrupt at all cost

Not giving handshakes  
PGS: Educational attainment  
Meta analysis Z-score: 4.98, p-value: 6.39E-07

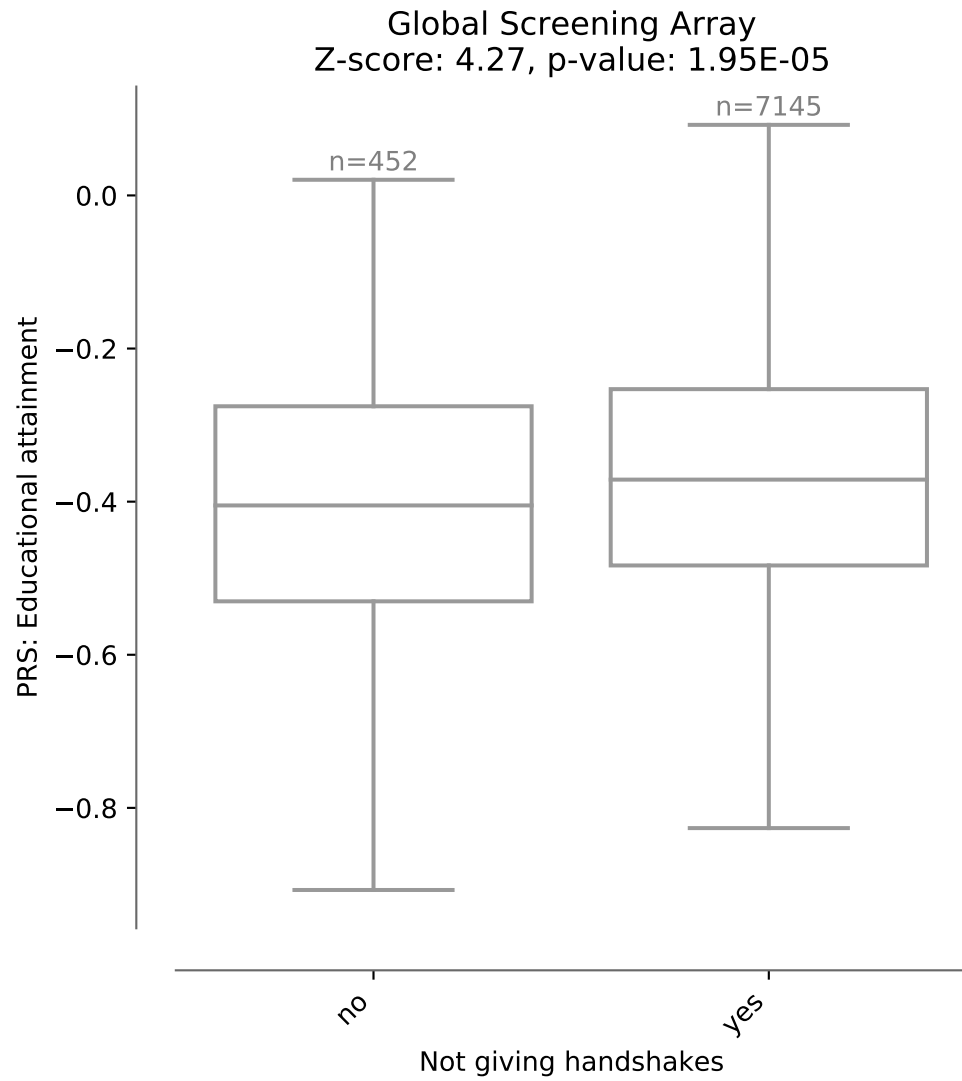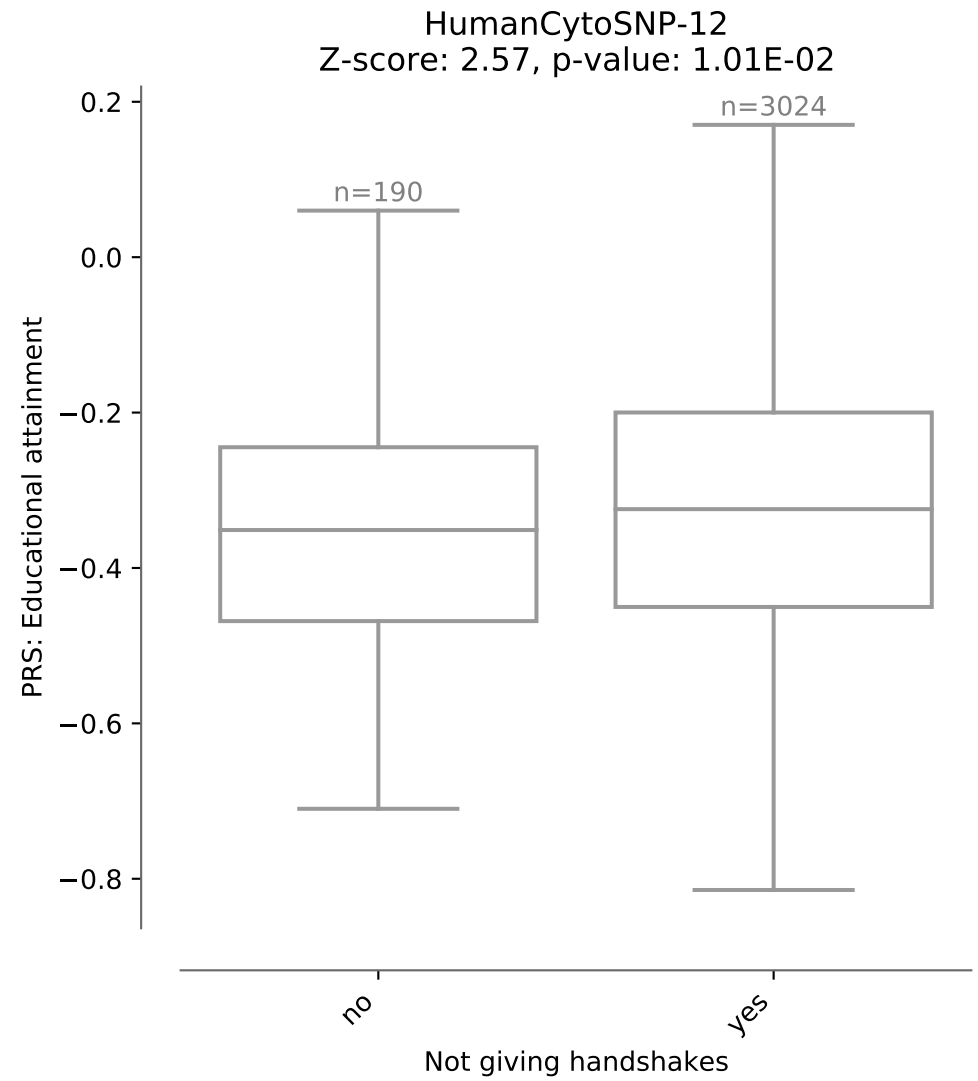

Willingness to comply longer to the measure of not giving handshakes

PGS: Schizophrenia

Meta analysis Z-score: 4.94, p-value: 7.85E-07

Global Screening Array  
Z-score: 4.85, p-value: 1.26E-06

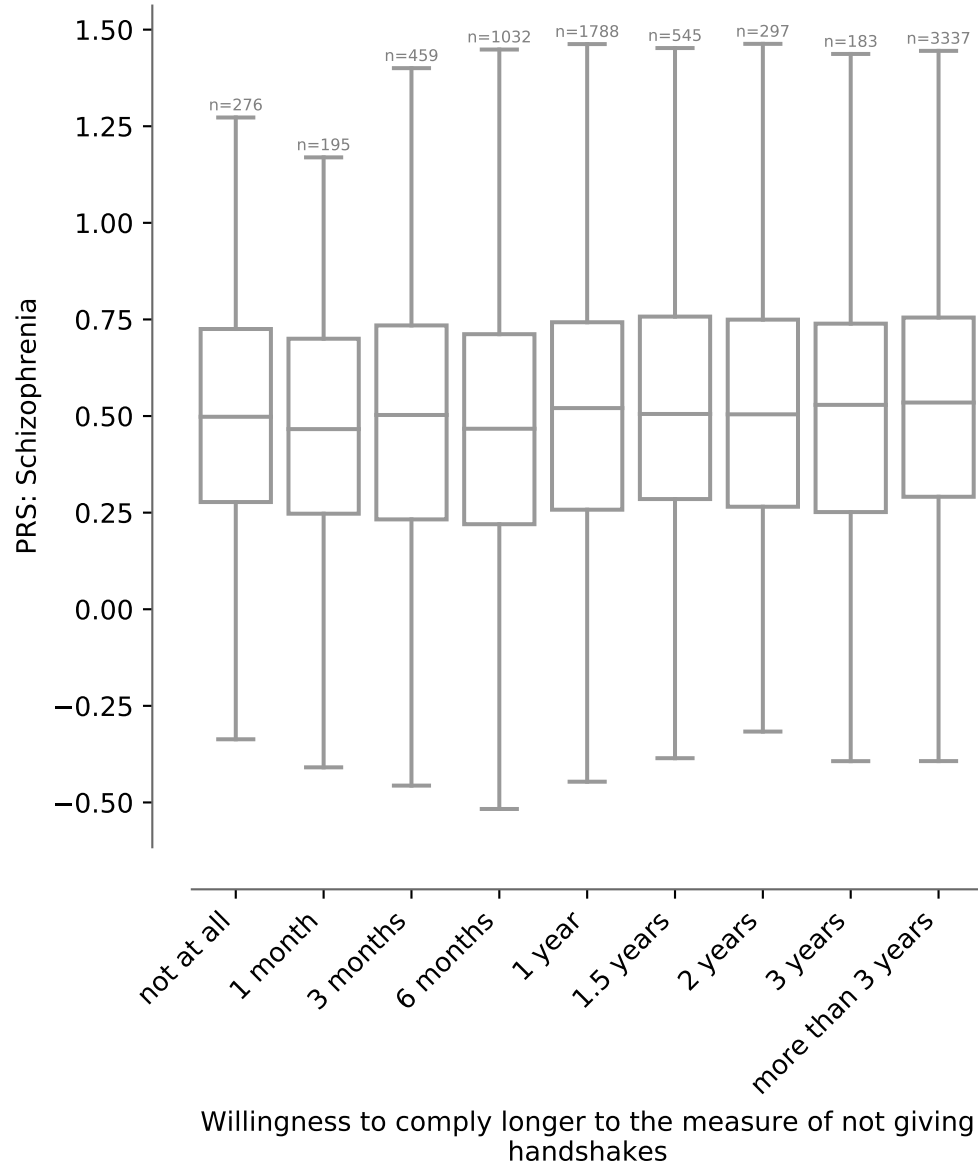

HumanCytoSNP-12  
Z-score: 1.62, p-value: 1.05E-01

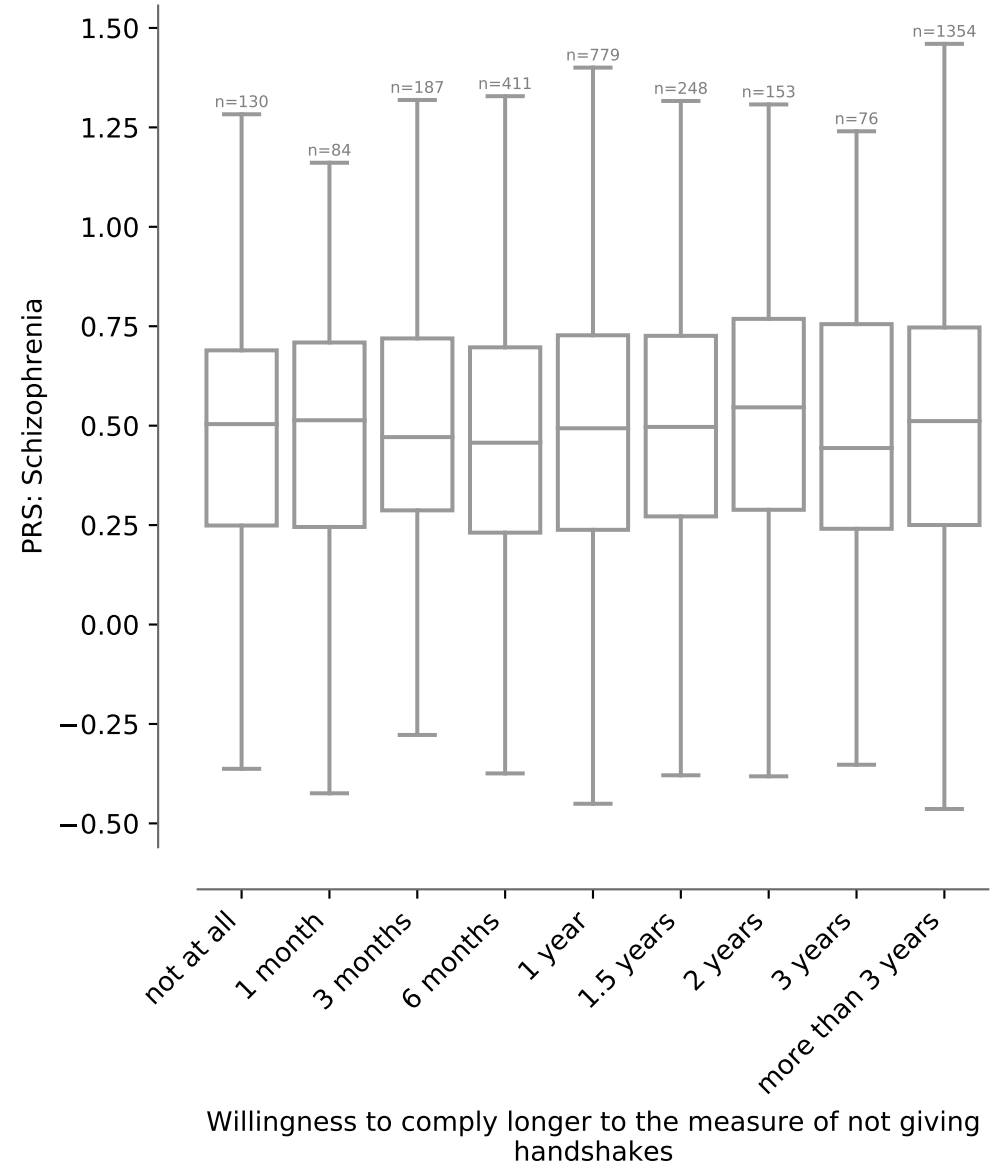

Being able to comply with the measure of not giving handshakes

PGS: Educational attainment

Meta analysis Z-score: 4.58, p-value: 4.64E-06

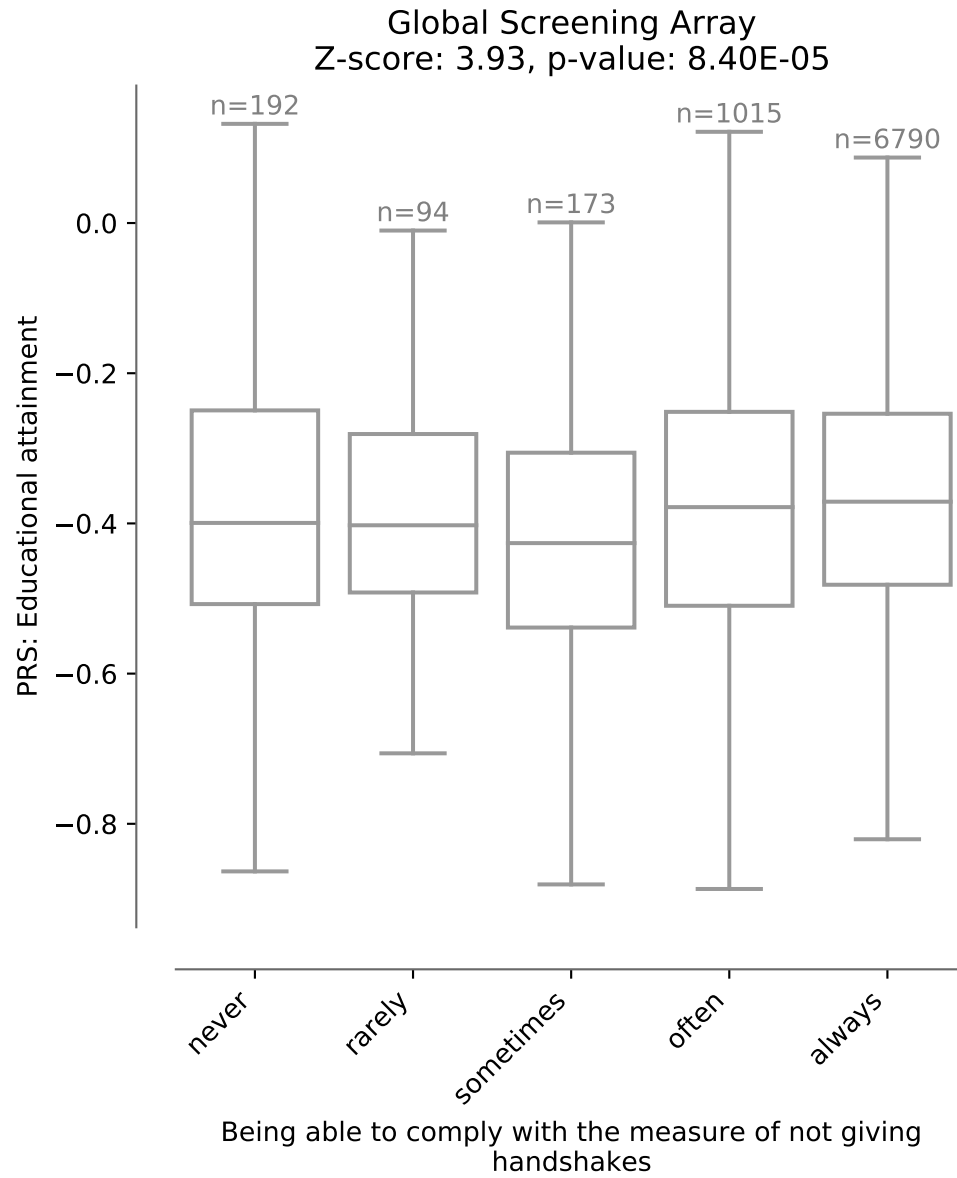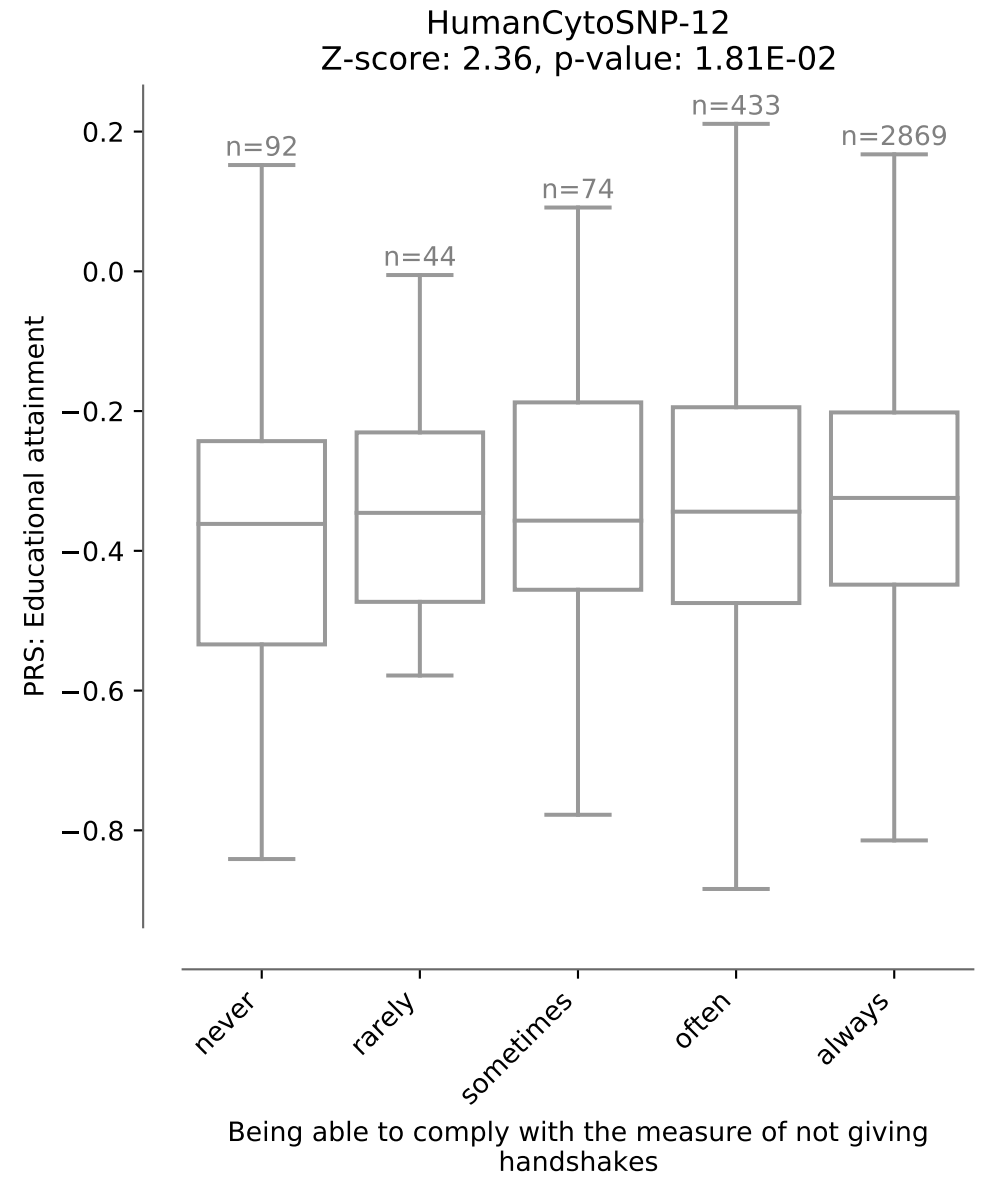

Had sensitive skin  
PGS: Life satisfaction  
Meta analysis Z-score: -5.41, p-value: 6.36E-08

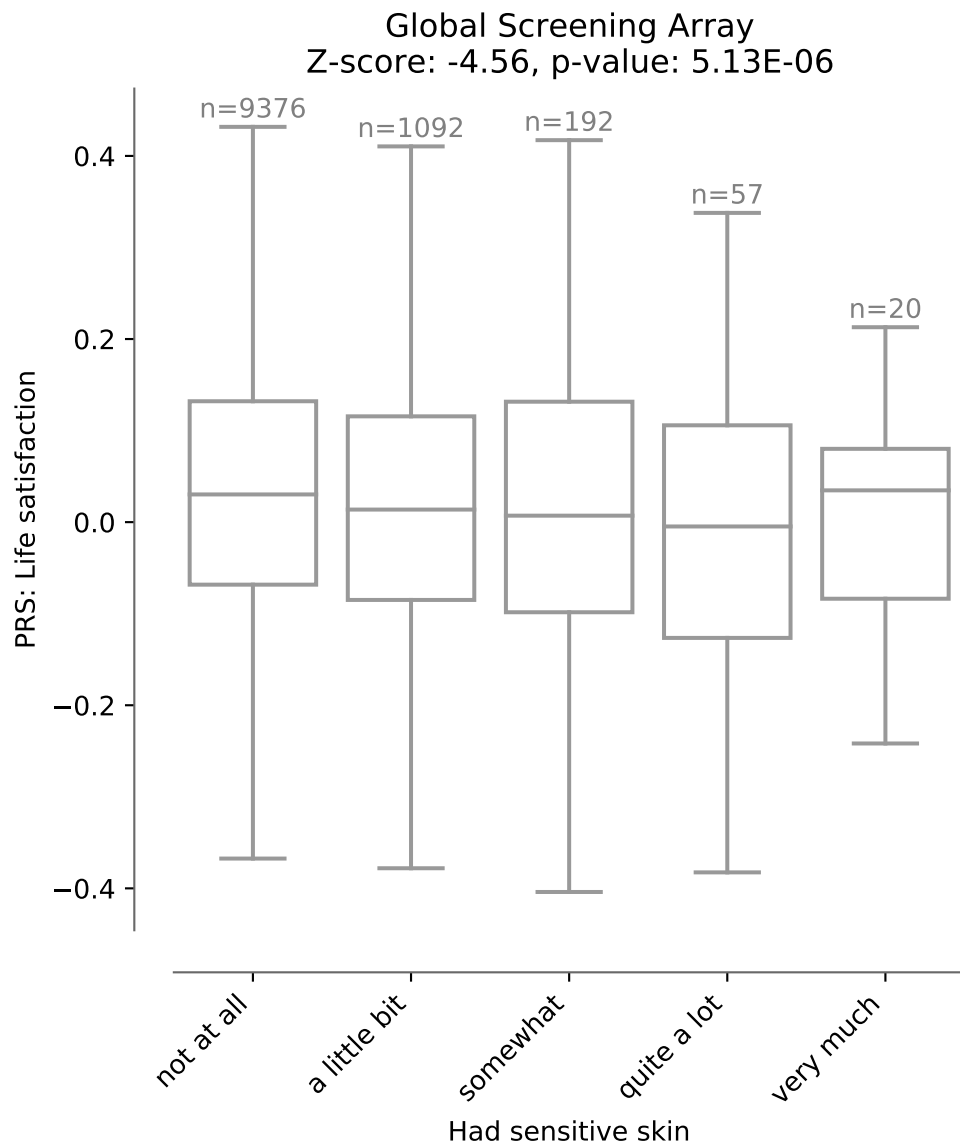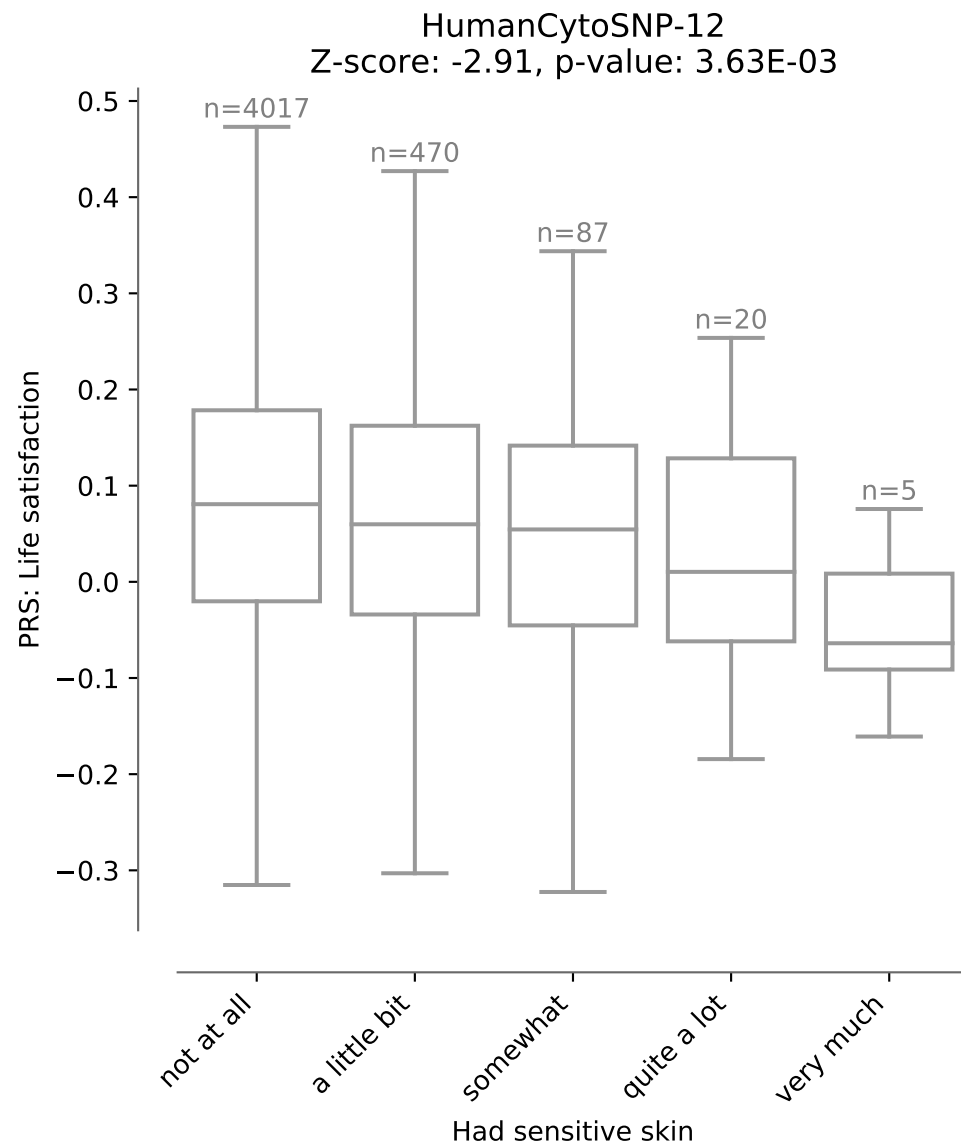



Had sensitive skin  
PGS: Schizophrenia  
Meta analysis Z-score: 5.51, p-value: 3.64E-08

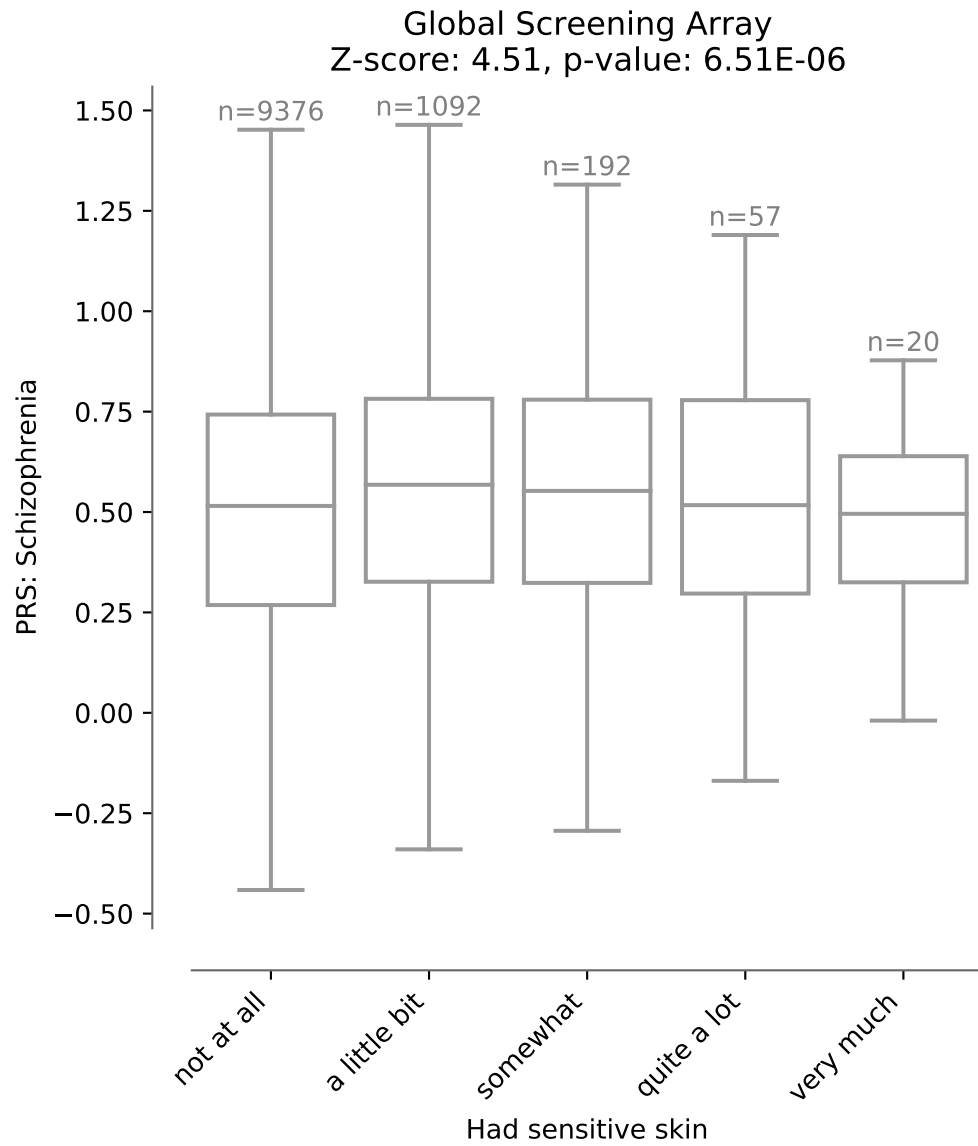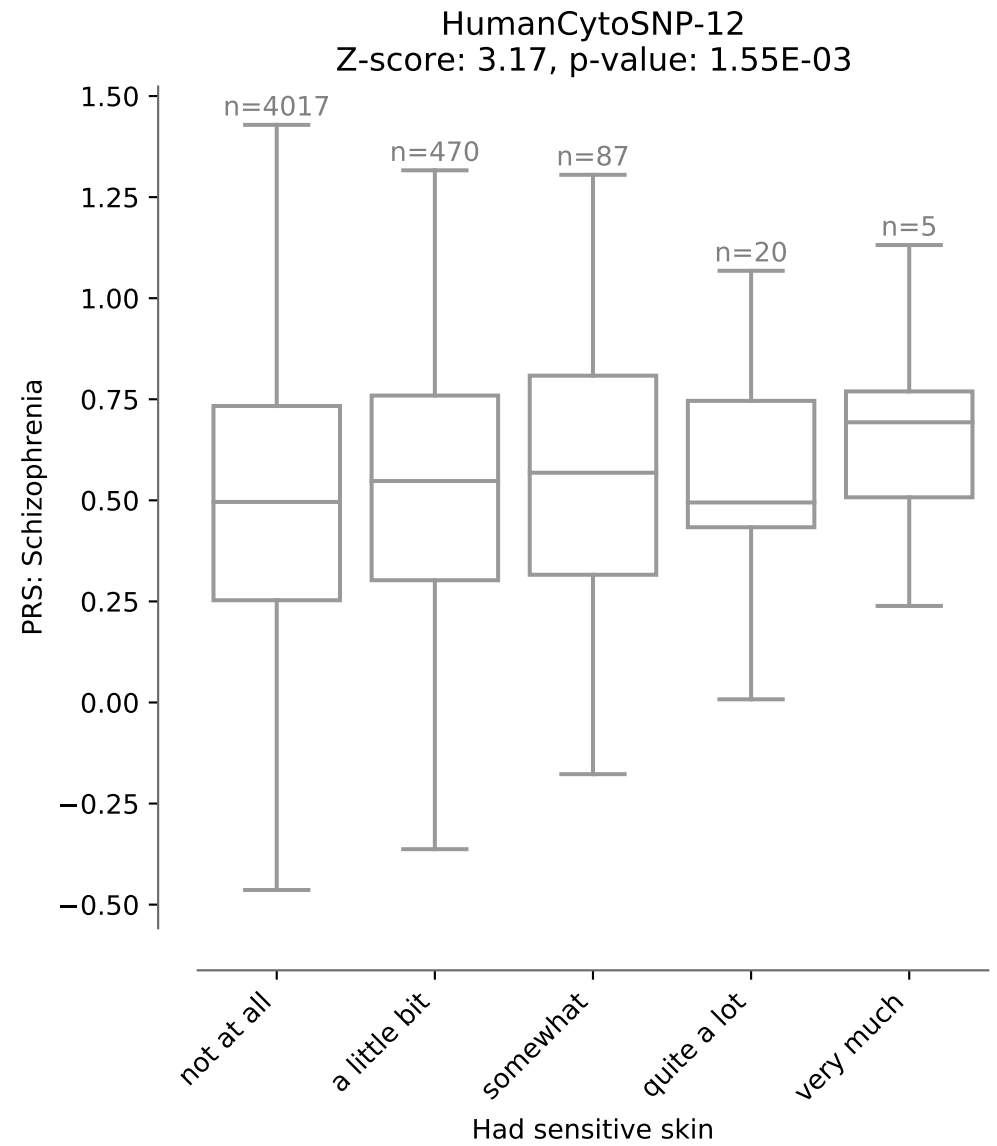

Felt inspired  
PGS: Educational attainment  
Meta analysis Z-score: 5.39, p-value: 6.89E-08

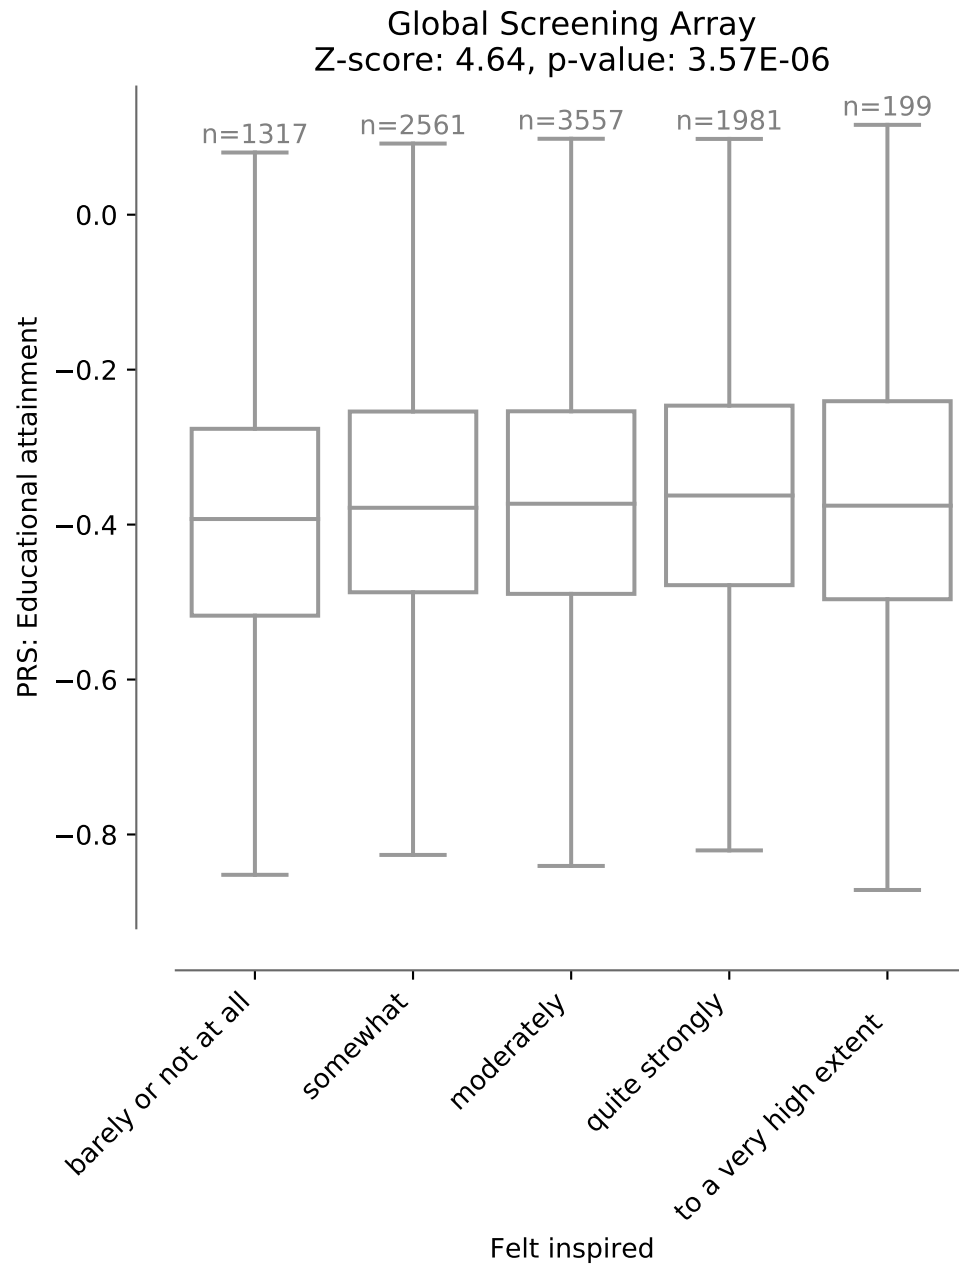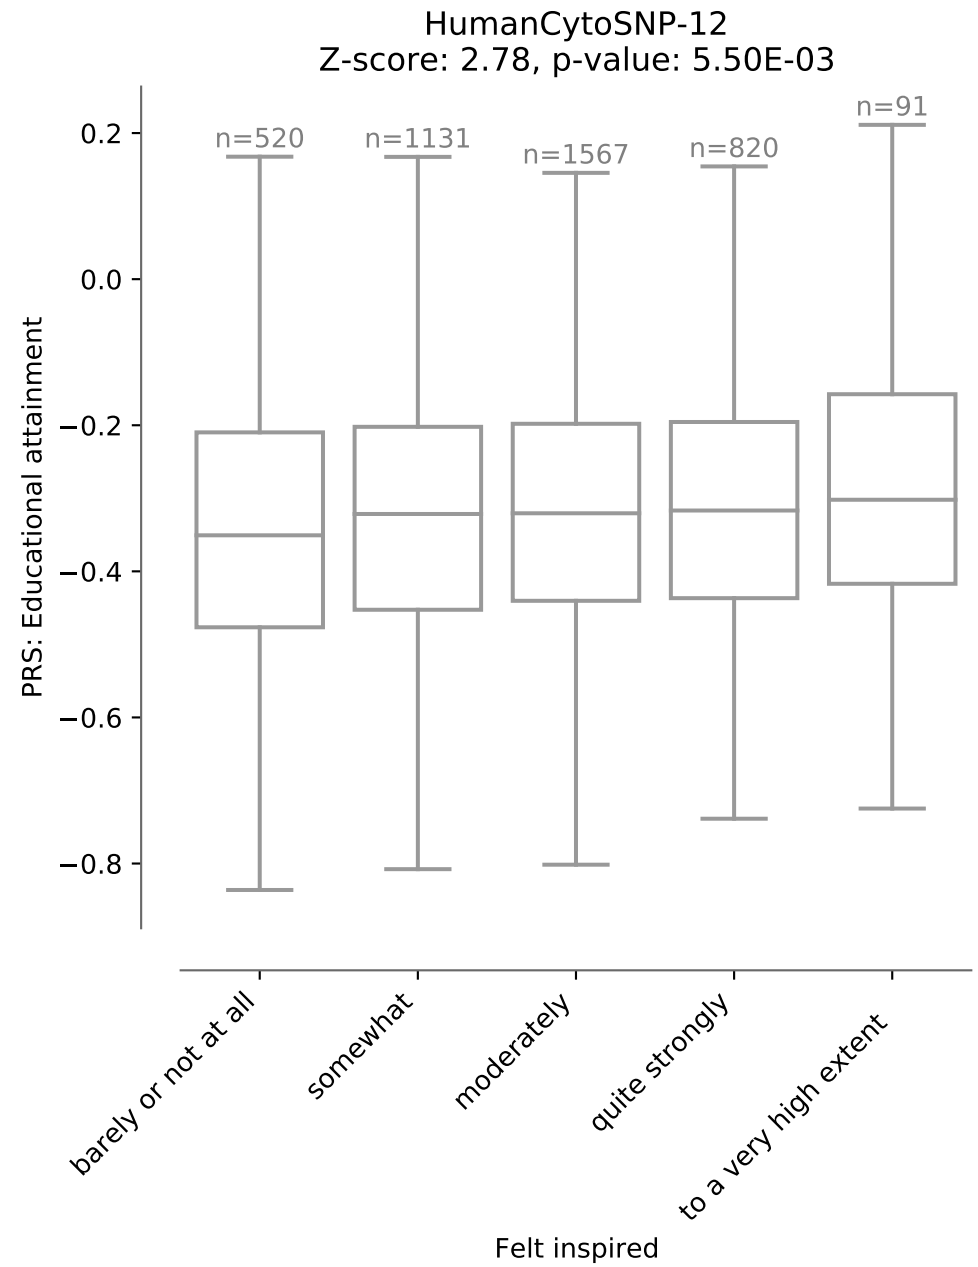

Had sleeping problems  
PGS: Life satisfaction  
Meta analysis Z-score: -6.91, p-value: 4.94E-12

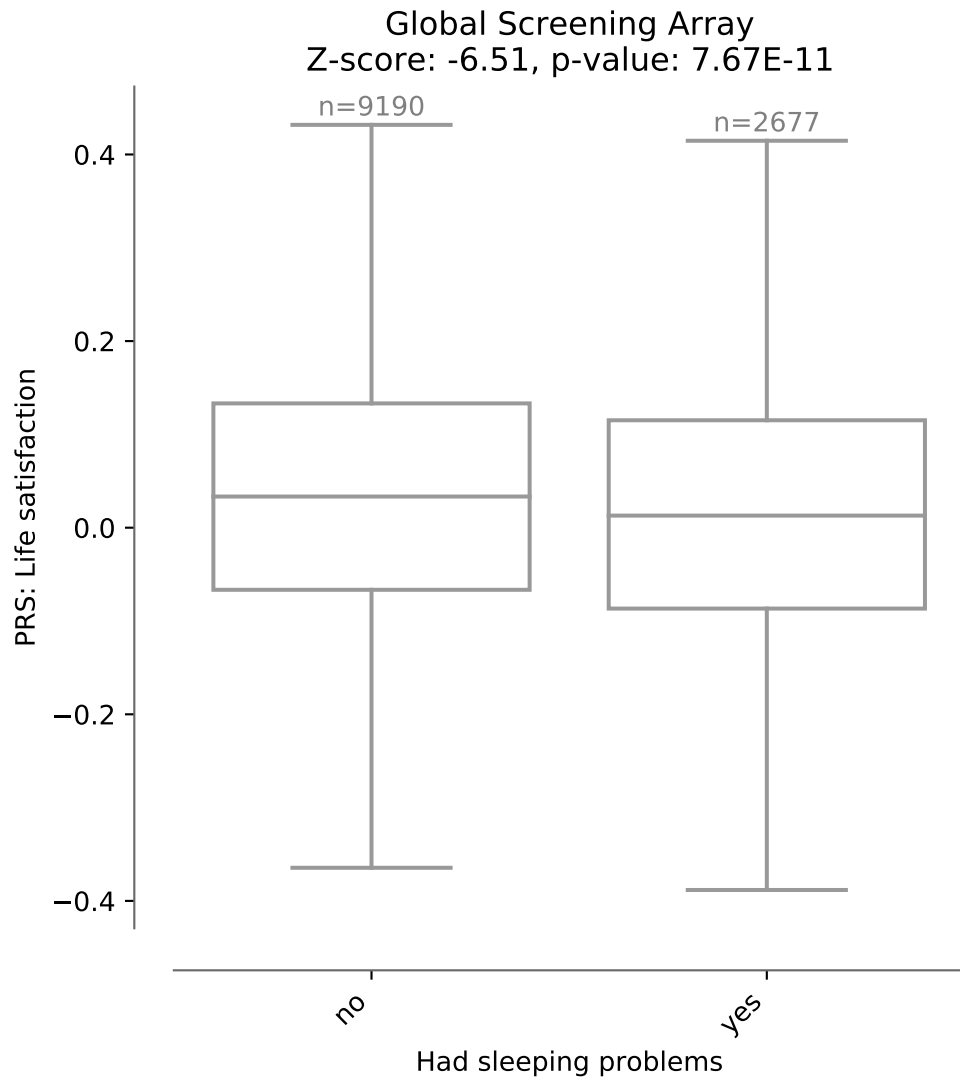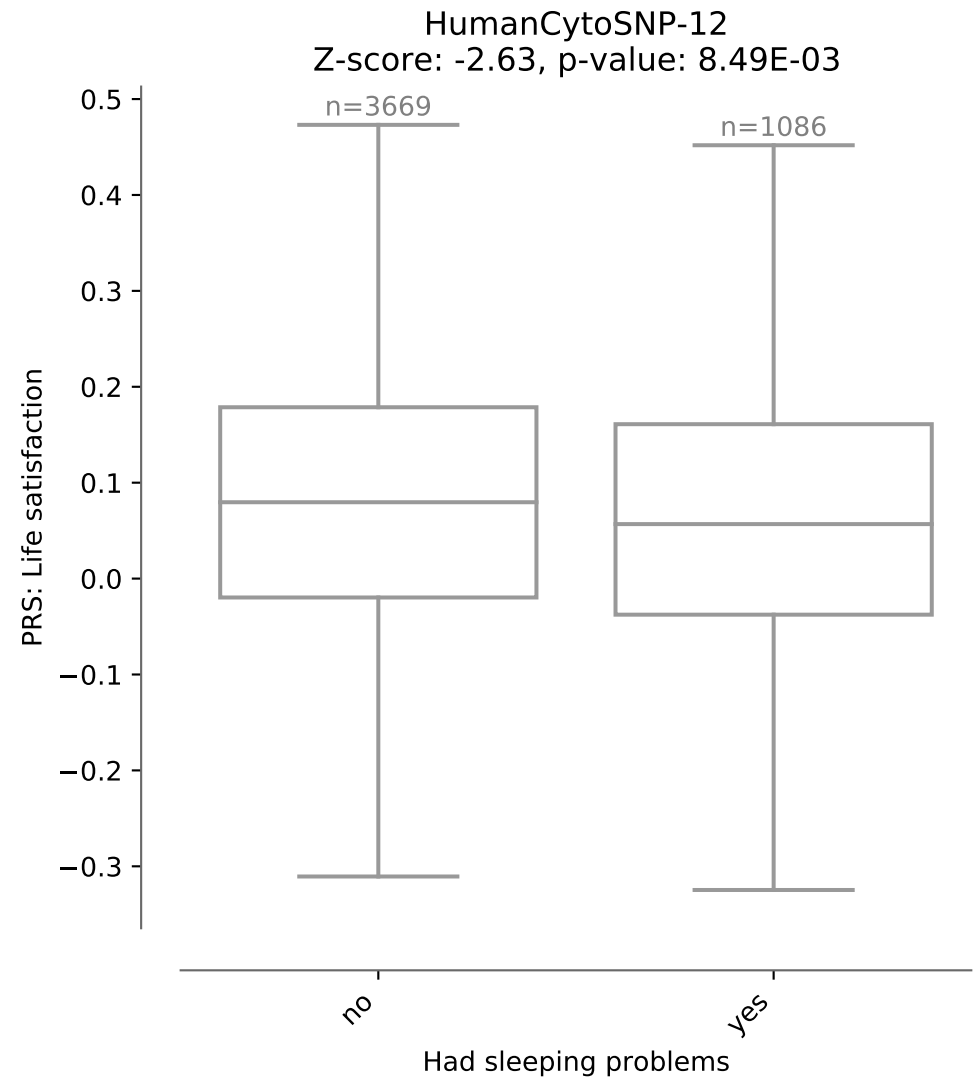

Had sleeping problems  
PGS: Neuroticism  
Meta analysis Z-score: 5.25, p-value: 1.55E-07

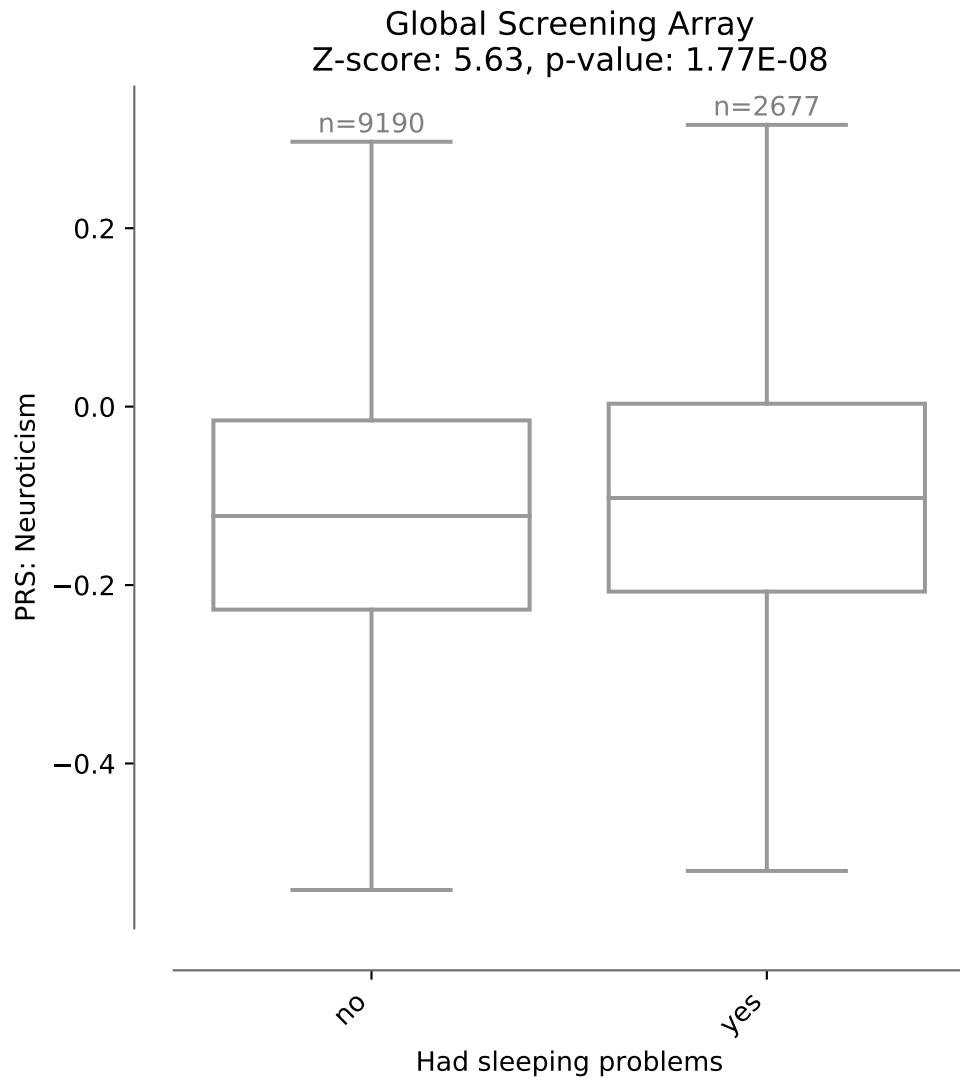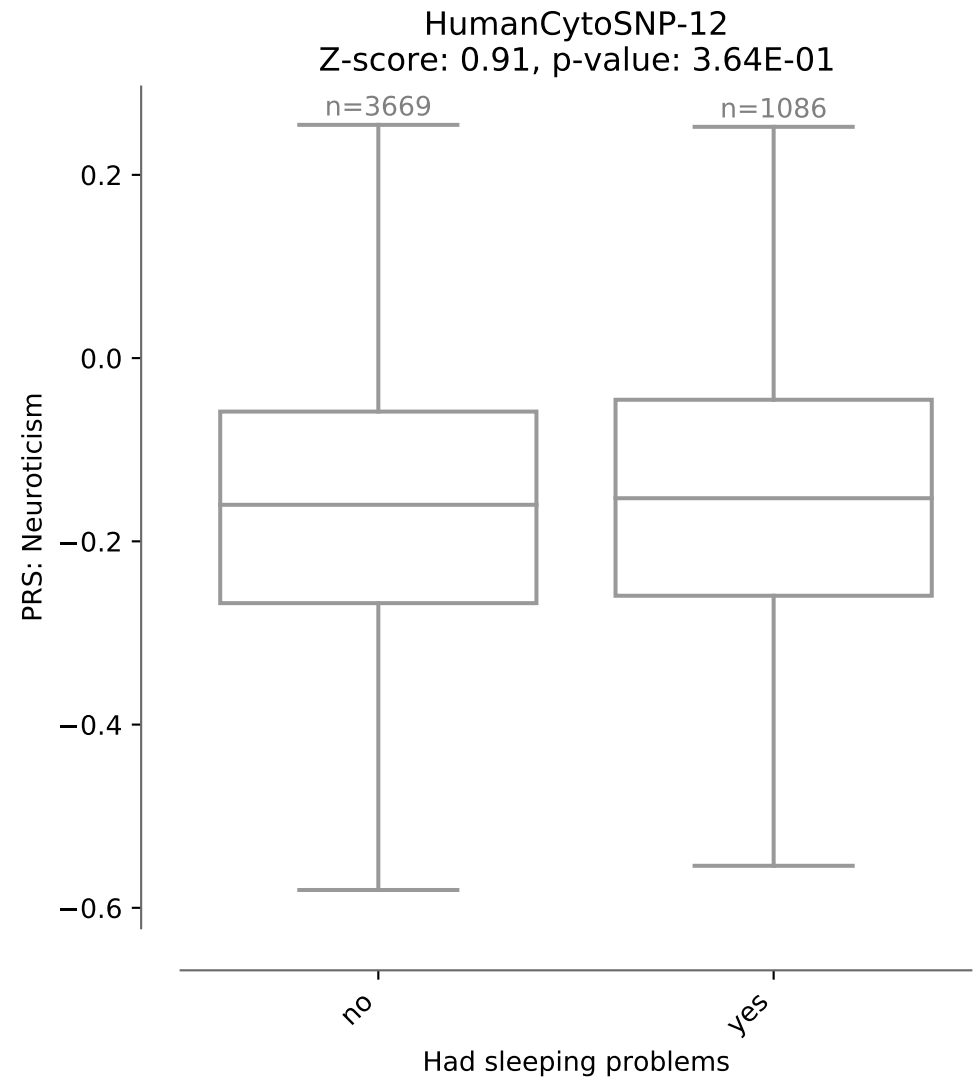

Smoked  
PGS: Anxiety/tension  
Meta analysis Z-score: -5.85, p-value: 4.87E-09

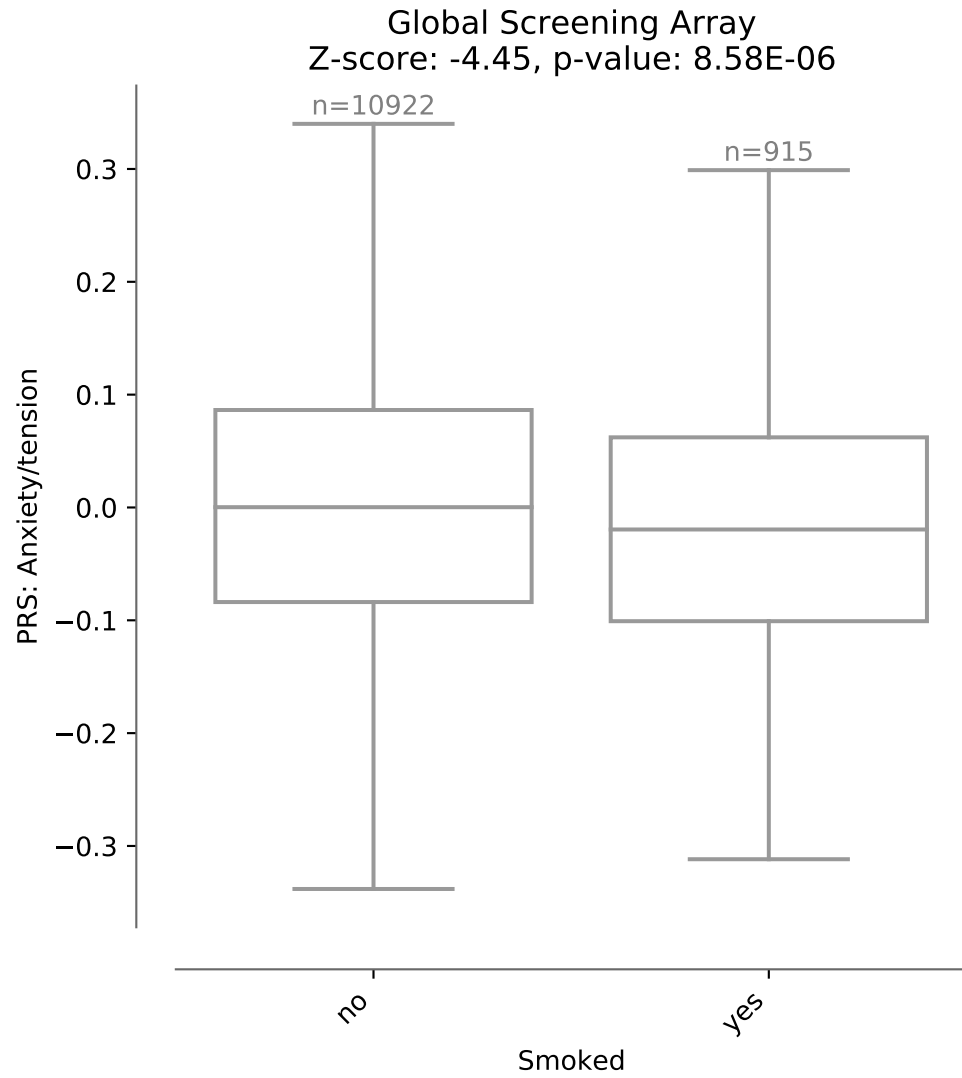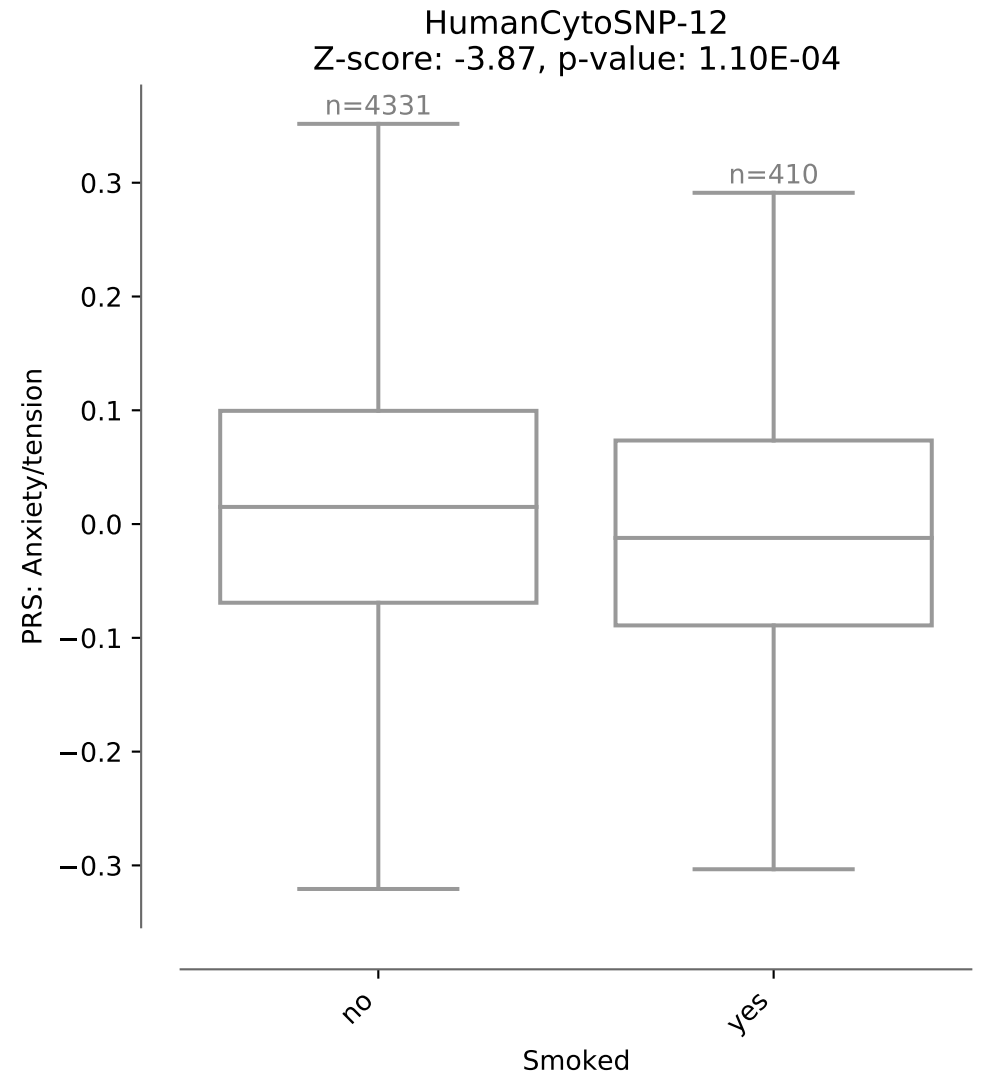

Smoked  
PGS: BMI  
Meta analysis Z-score: 6.56, p-value: 5.24E-11

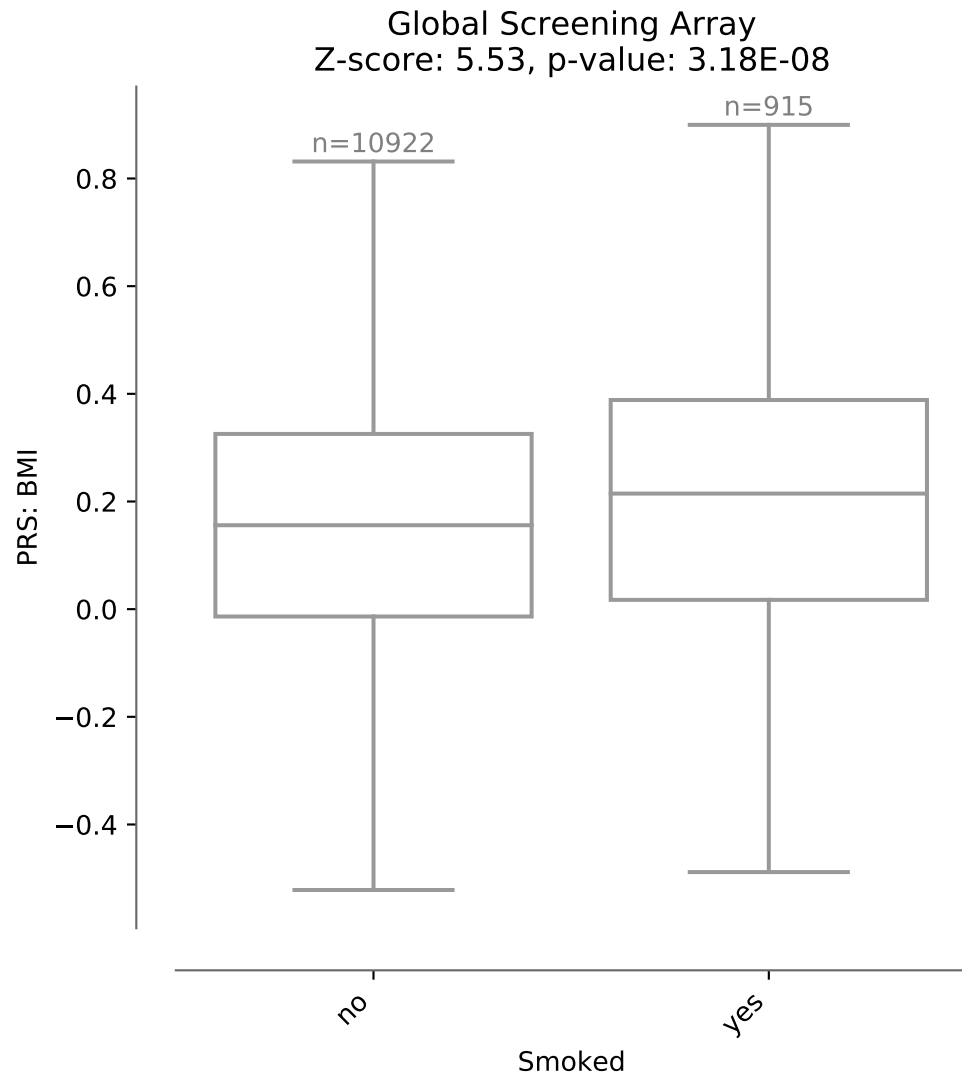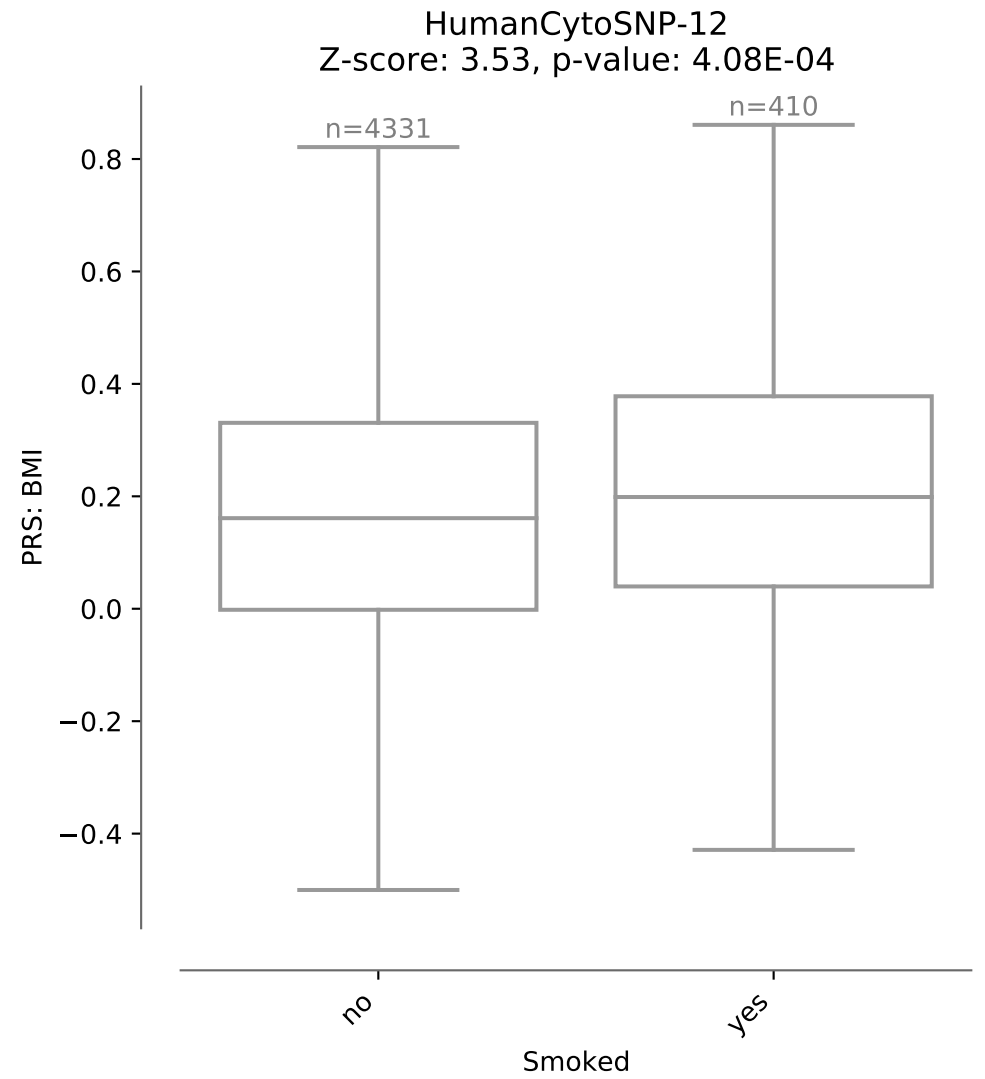

Smoked  
PGS: Tobacco use  
Meta analysis Z-score: 5.23, p-value: 1.66E-07

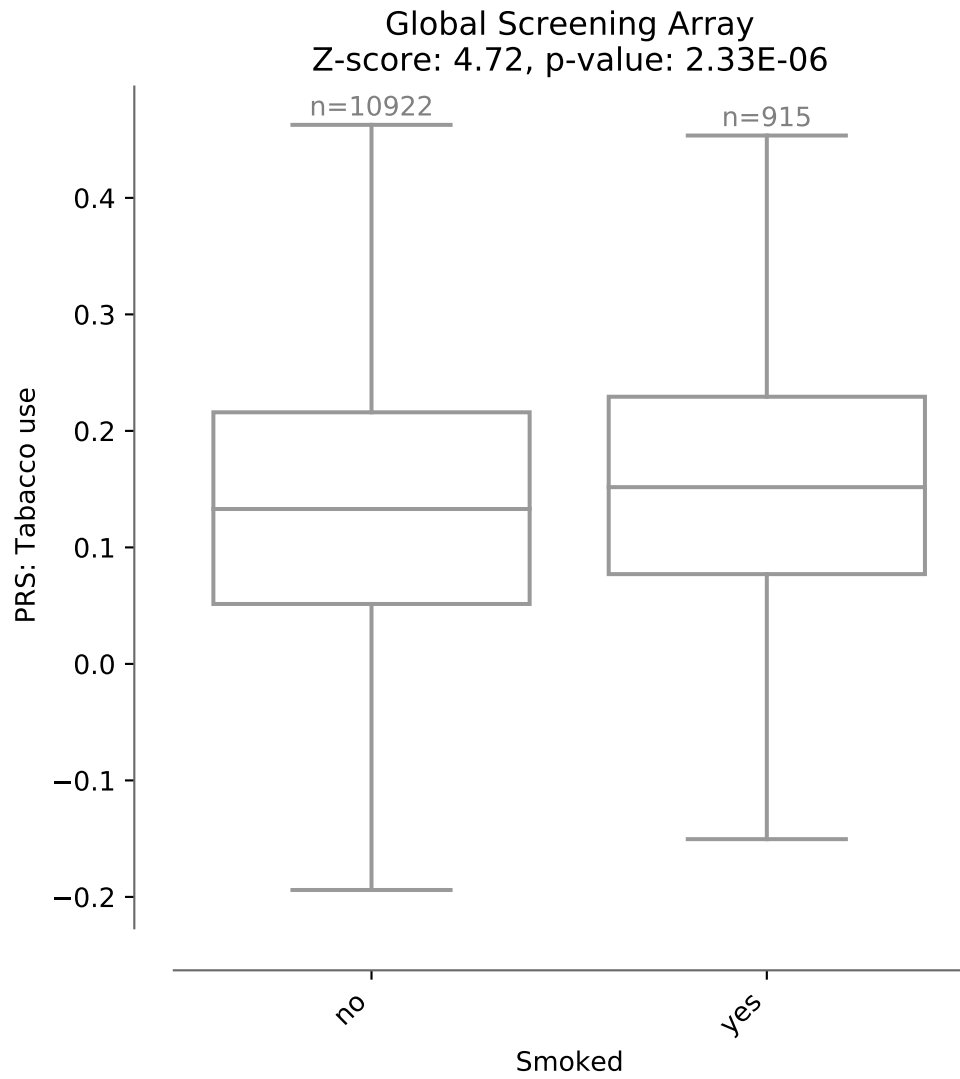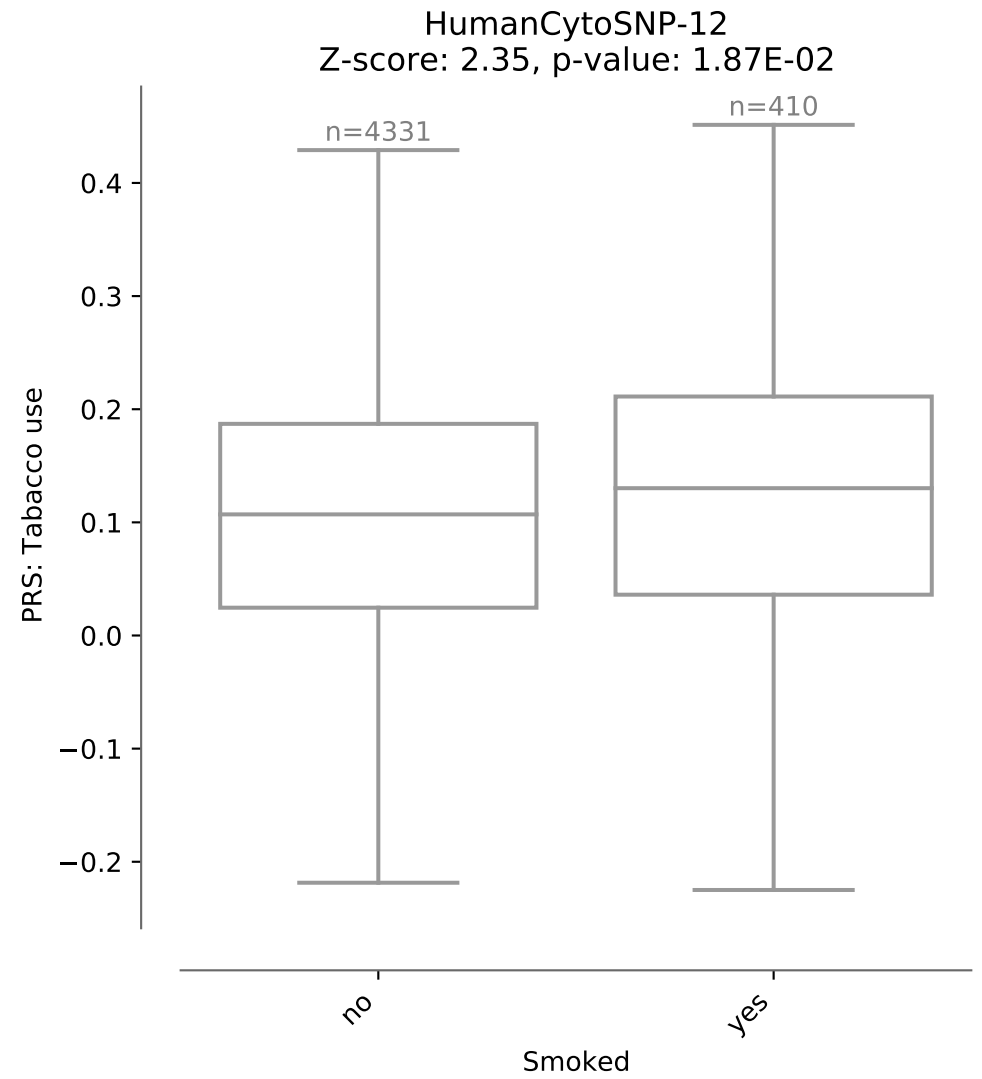

Smoked  
PGS: Educational attainment  
Meta analysis Z-score: -8.83, p-value: 1.05E-18

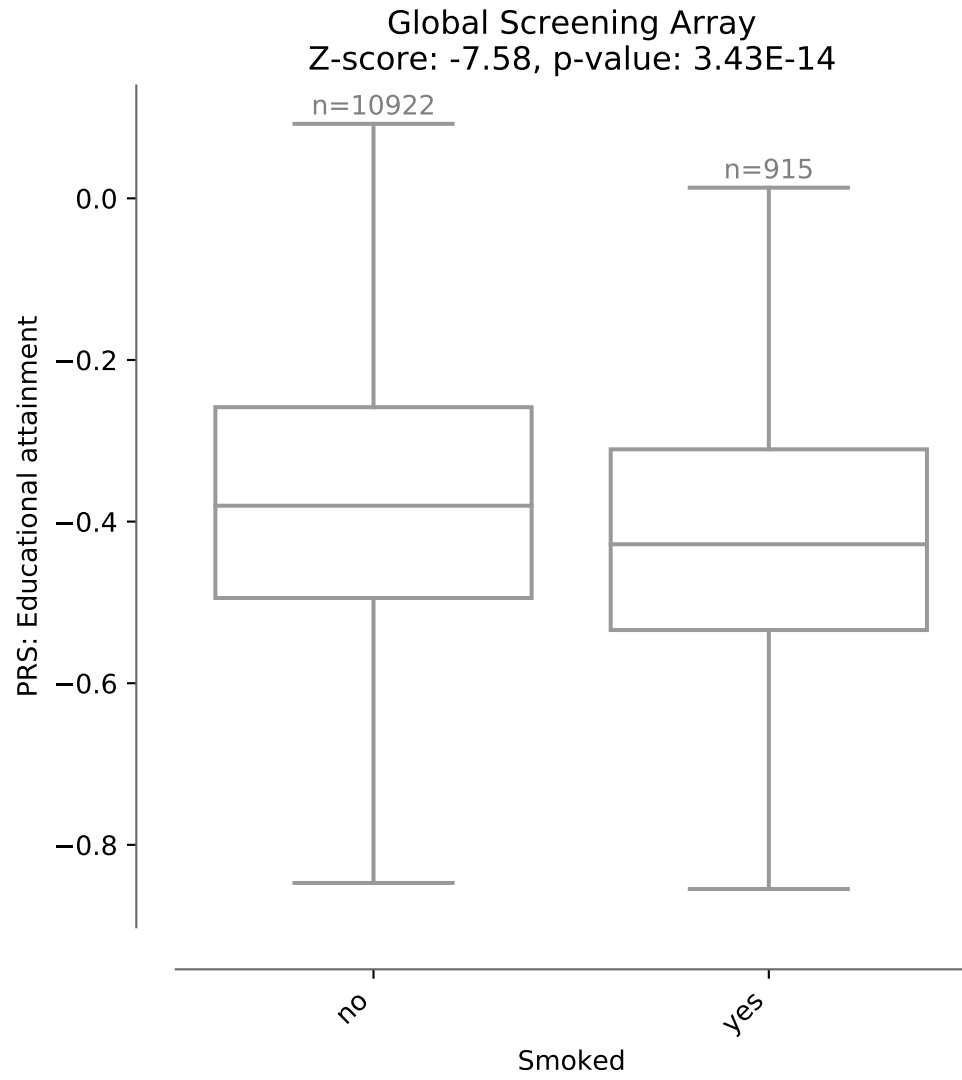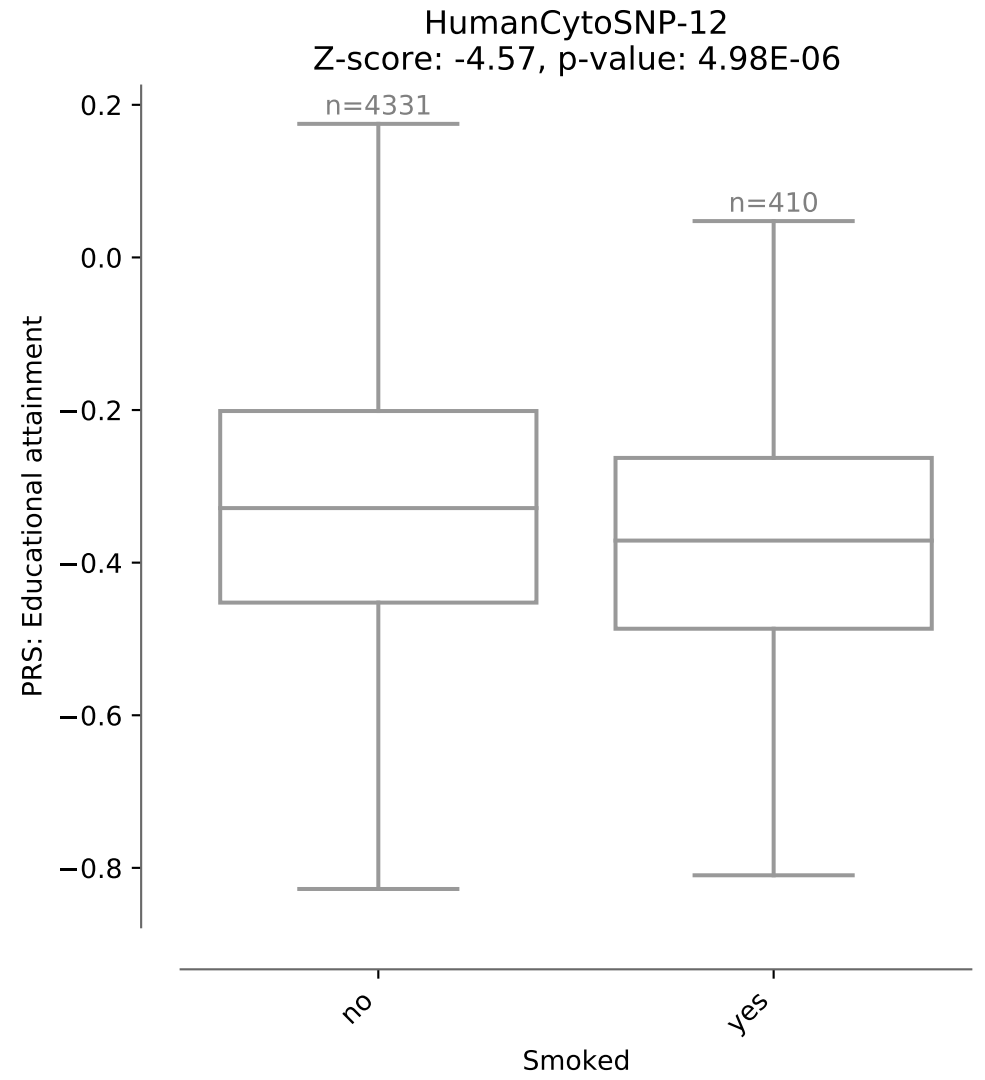



Taken medication  
PGS: Educational attainment  
Meta analysis Z-score: -4.99, p-value: 6.08E-07

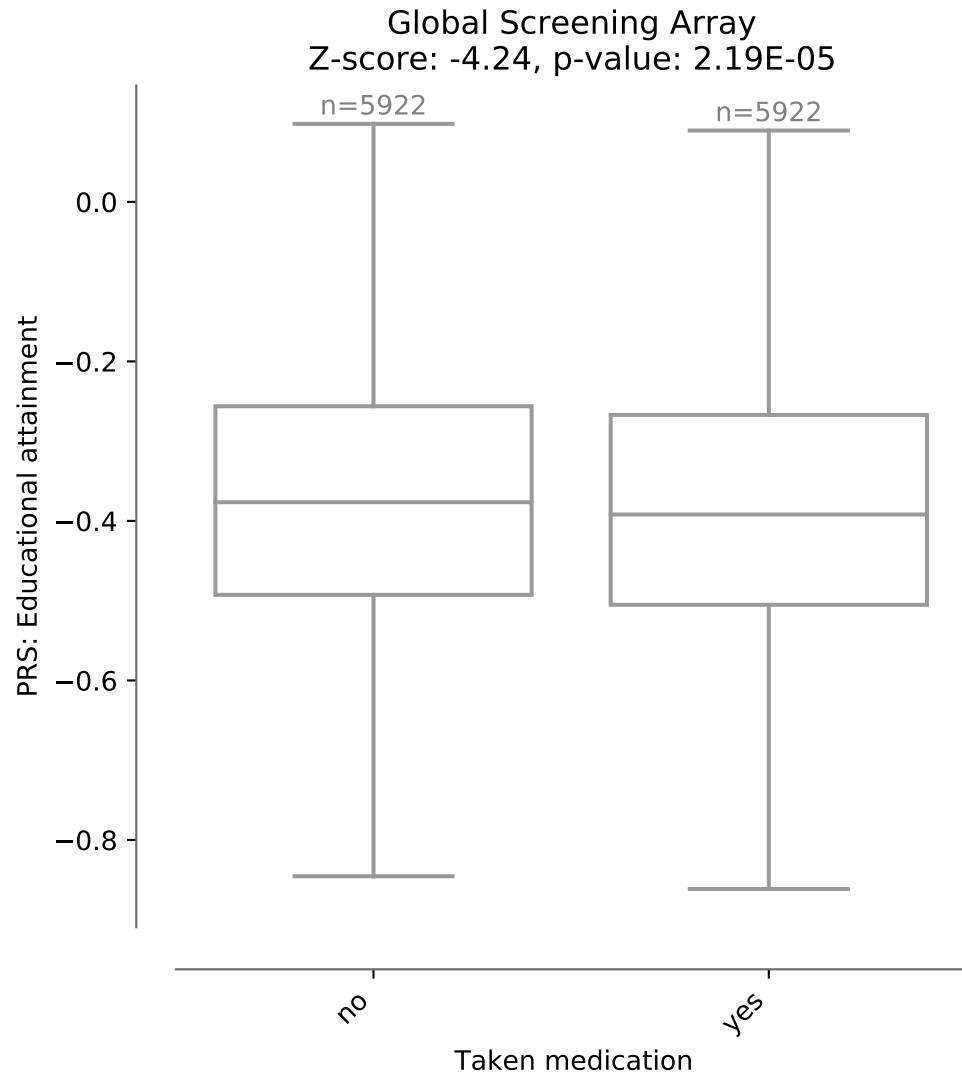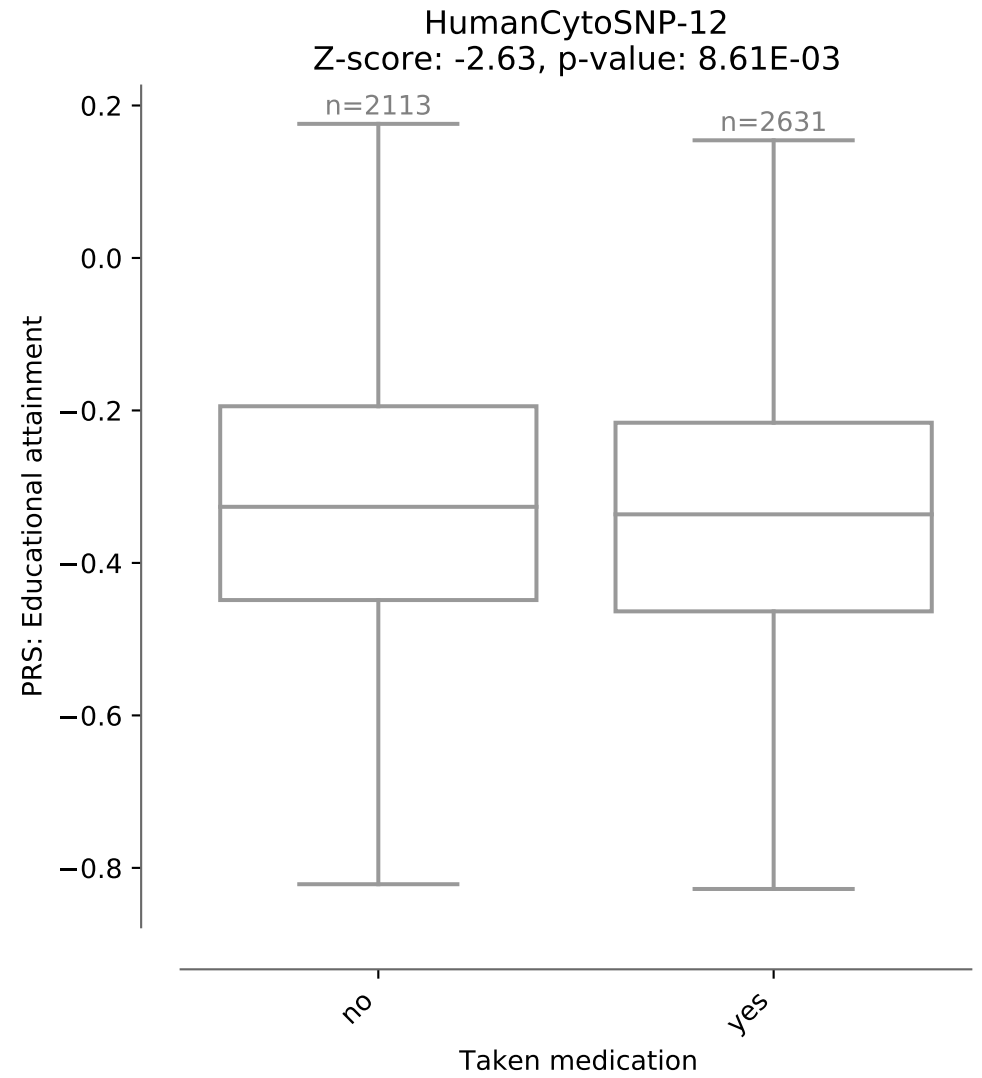

Taken medication  
PGS: Life satisfaction  
Meta analysis Z-score: -4.54, p-value: 5.70E-06

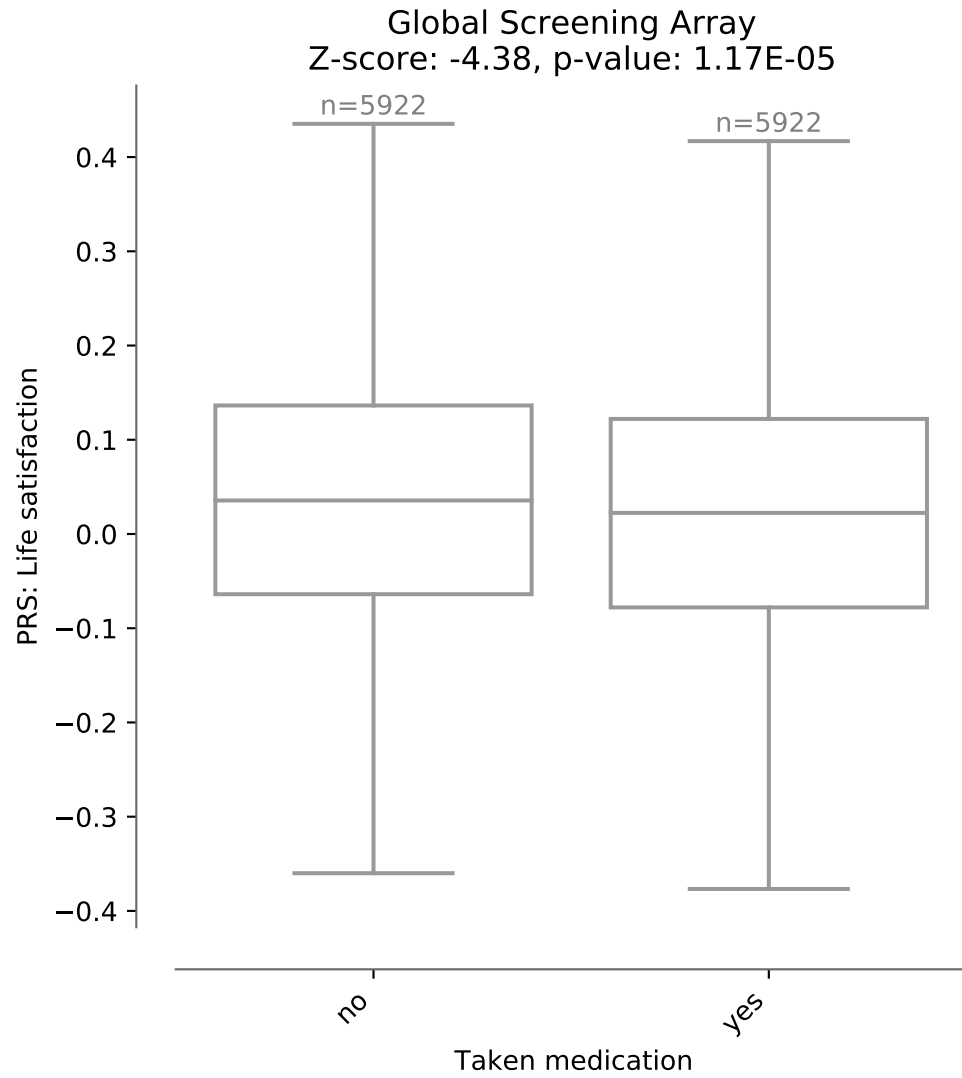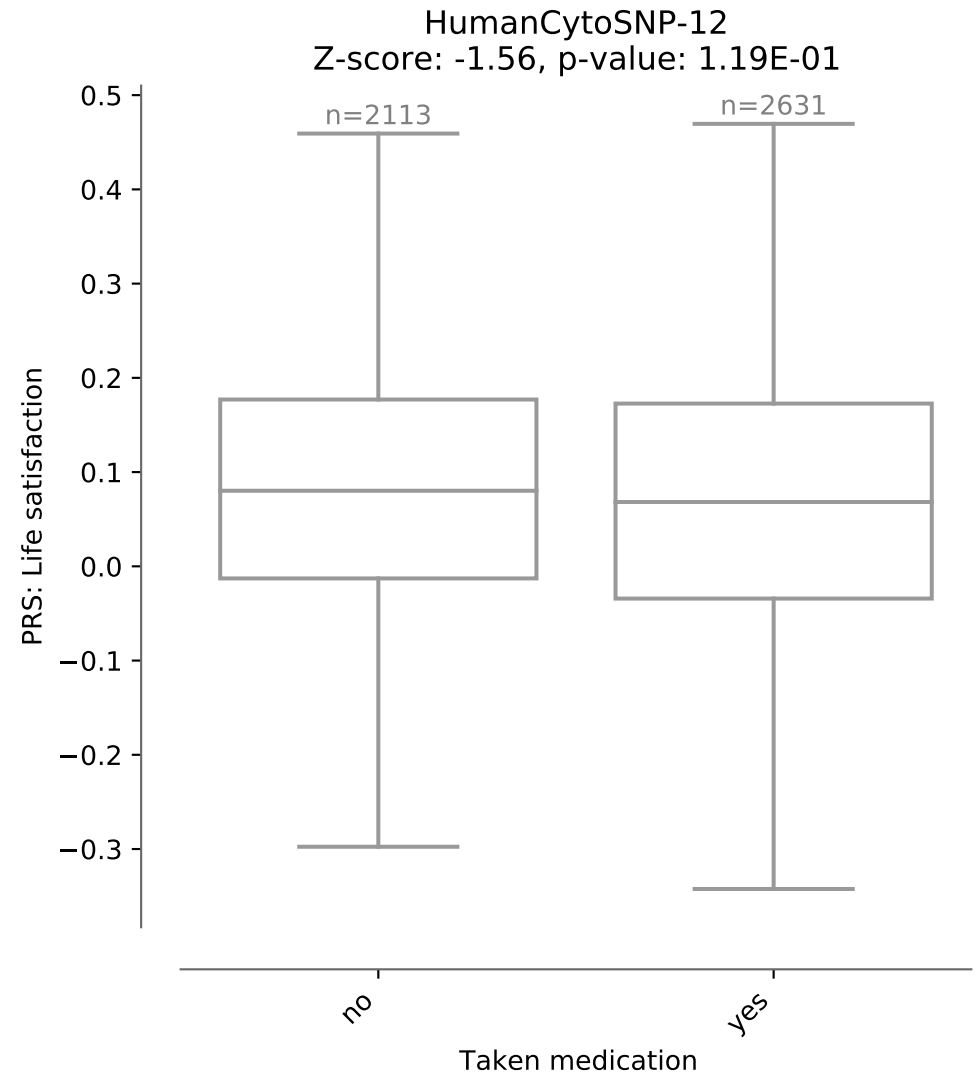

Having (Foster)child(ren) in higher education living away from home  
PGS: Educational attainment  
Meta analysis Z-score: 7.22, p-value: 5.32E-13

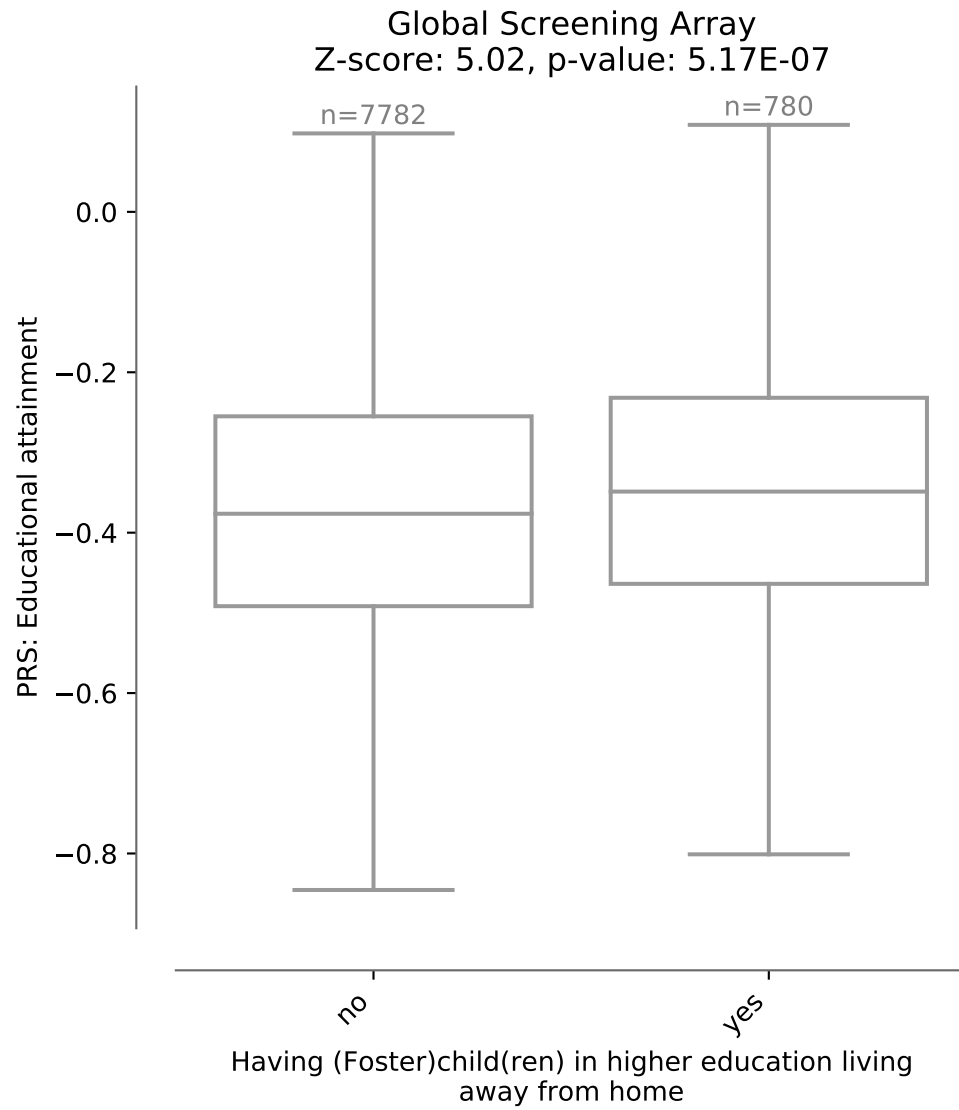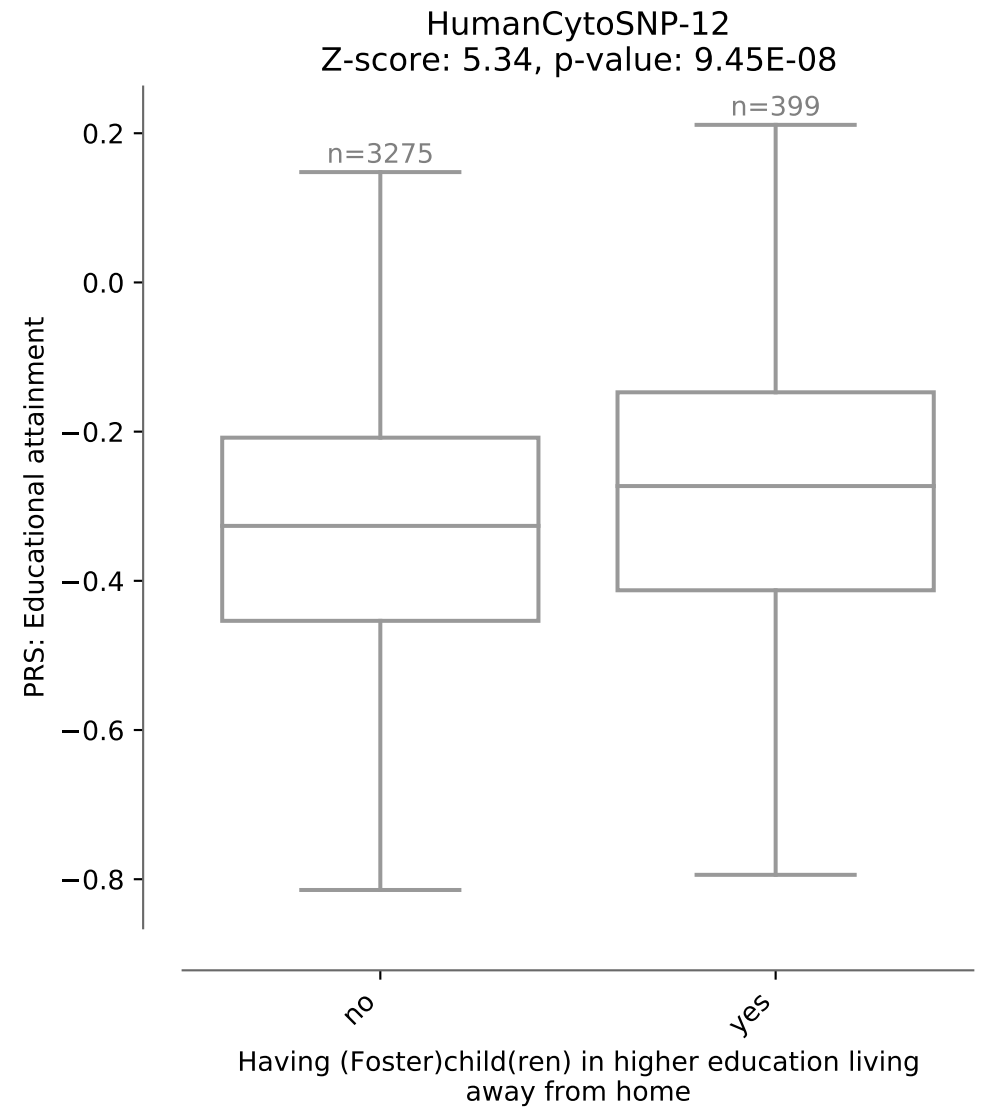

Excessive worrying  
PGS: Life satisfaction  
Meta analysis Z-score: -7.71, p-value: 1.29E-14

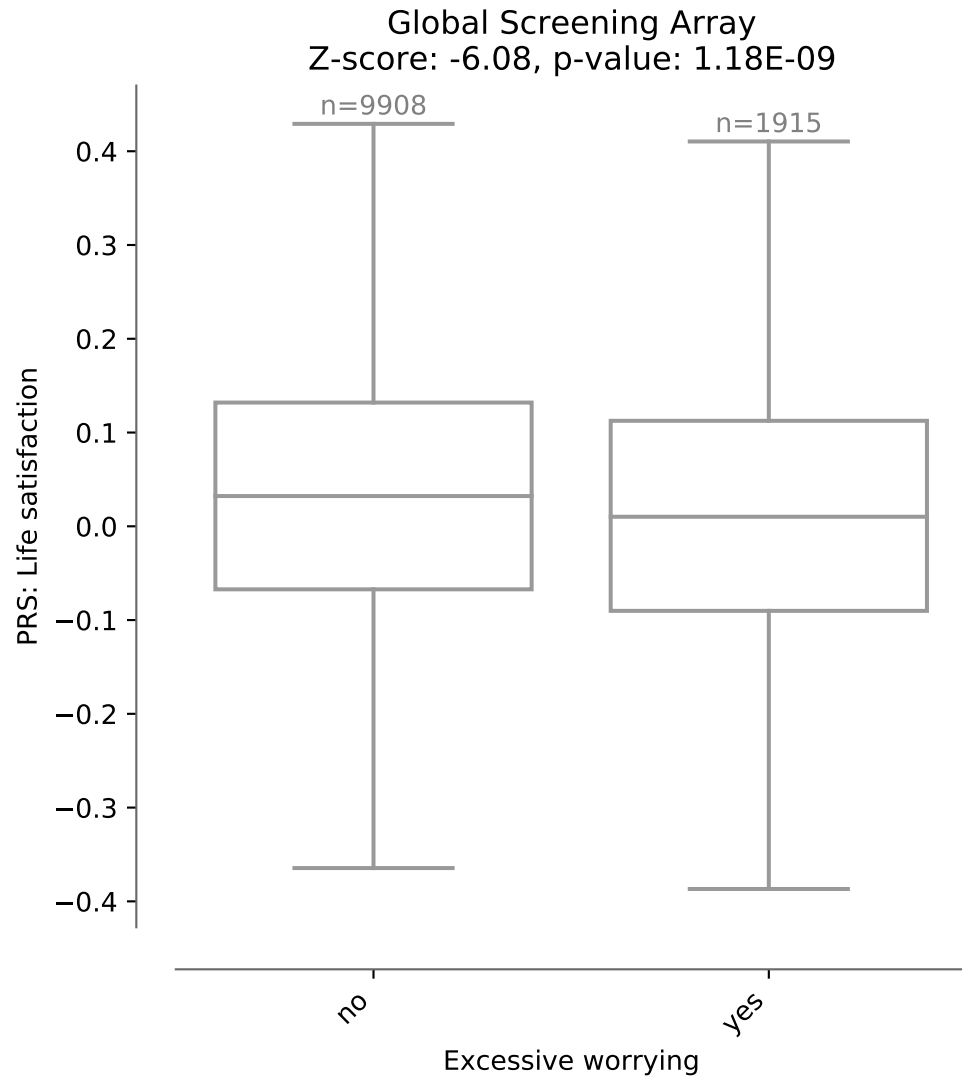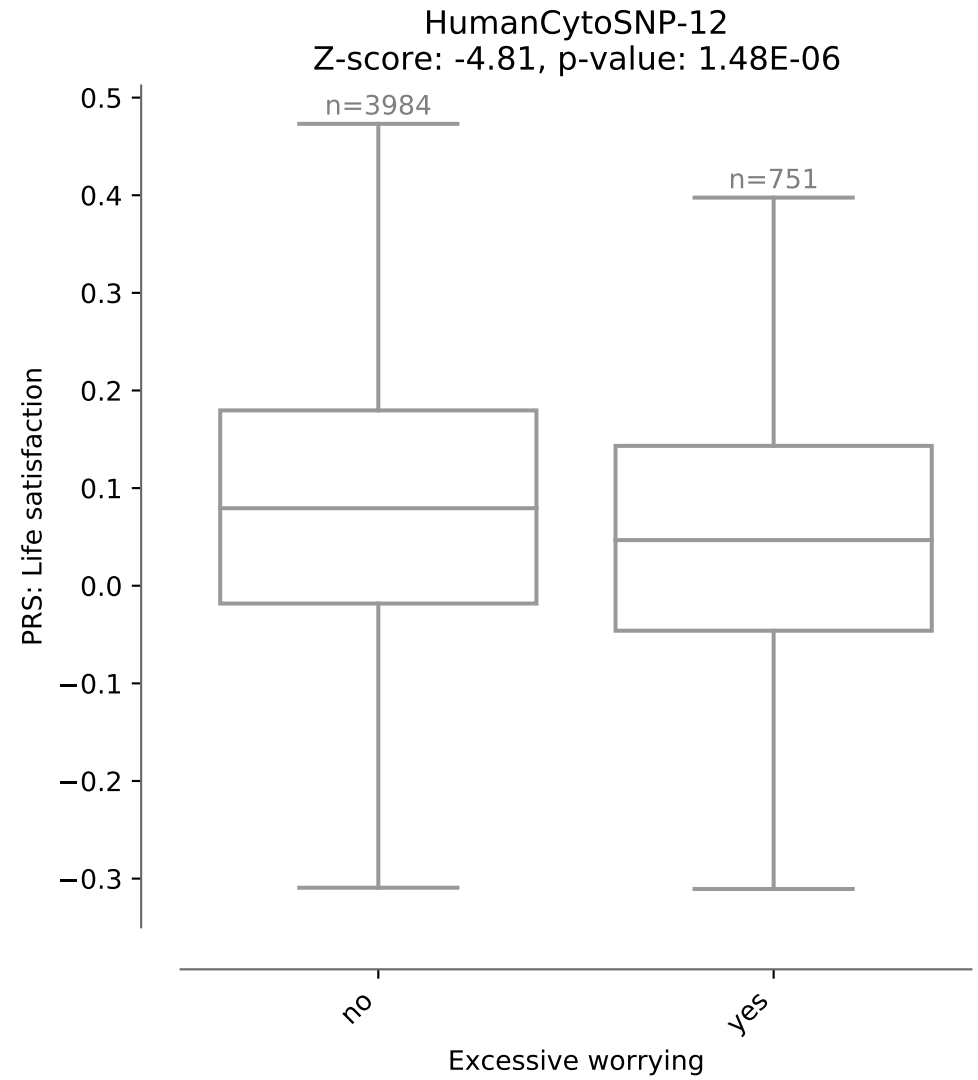

Excessive worrying  
PGS: Neuroticism  
Meta analysis Z-score: 7.18, p-value: 6.75E-13

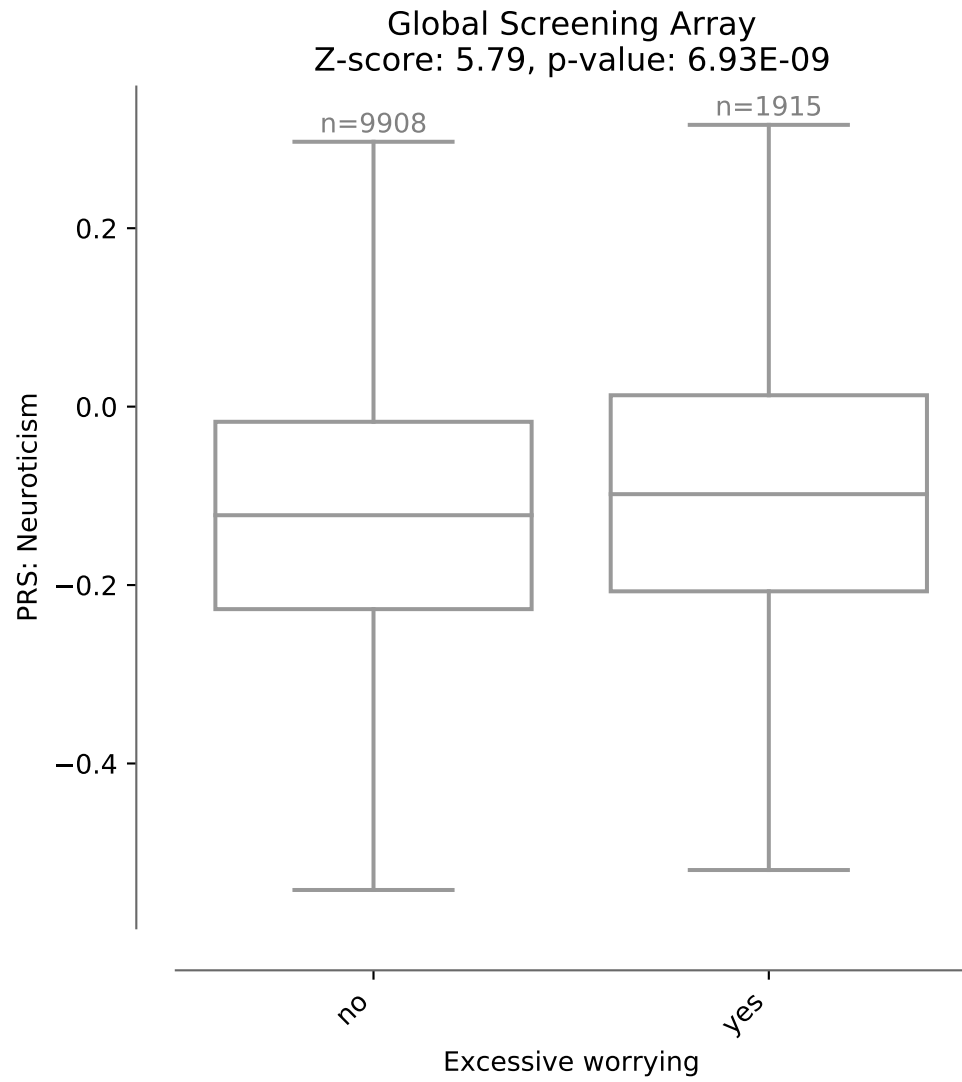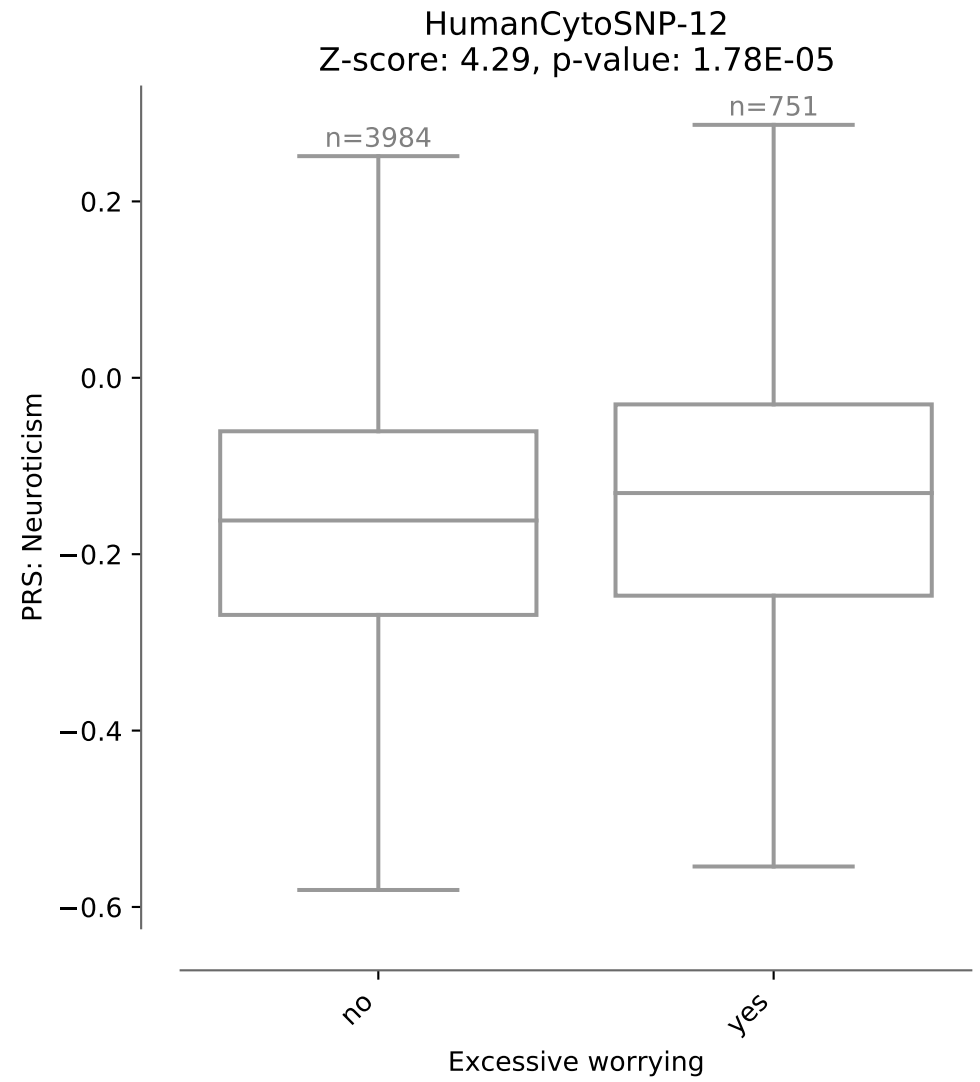

Feeling that society is in a crisis  
PGS: Depression  
Meta analysis Z-score: 4.51, p-value: 6.44E-06

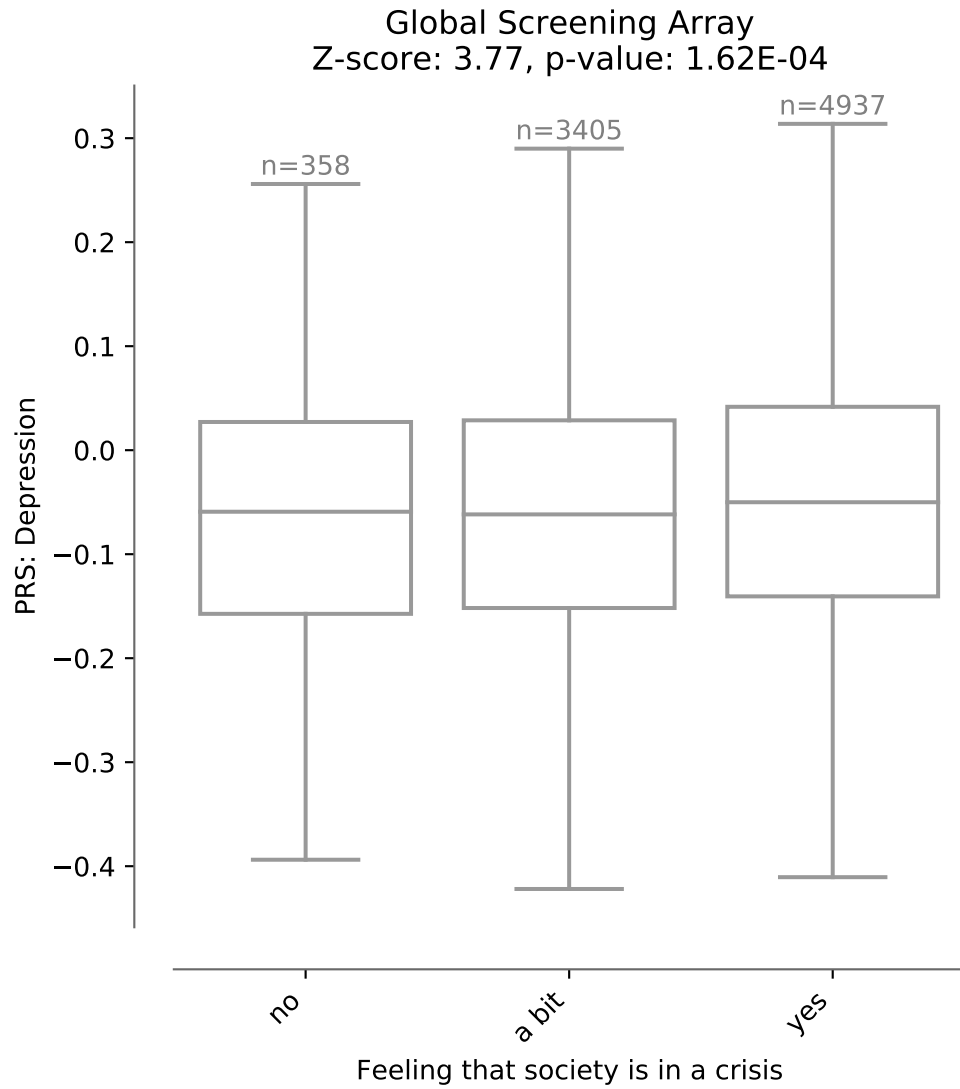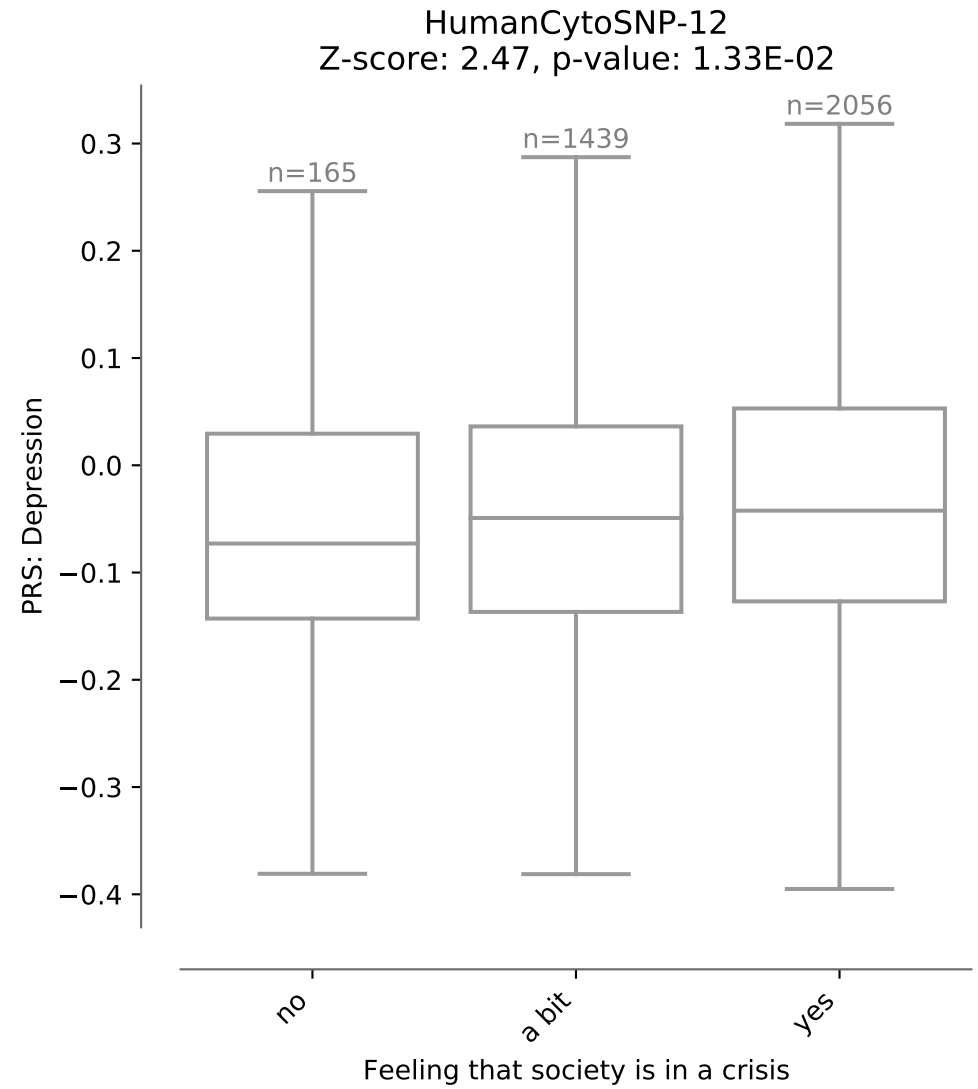

Having lost interest  
PGS: Educational attainment  
Meta analysis Z-score: -5.02, p-value: 5.18E-07

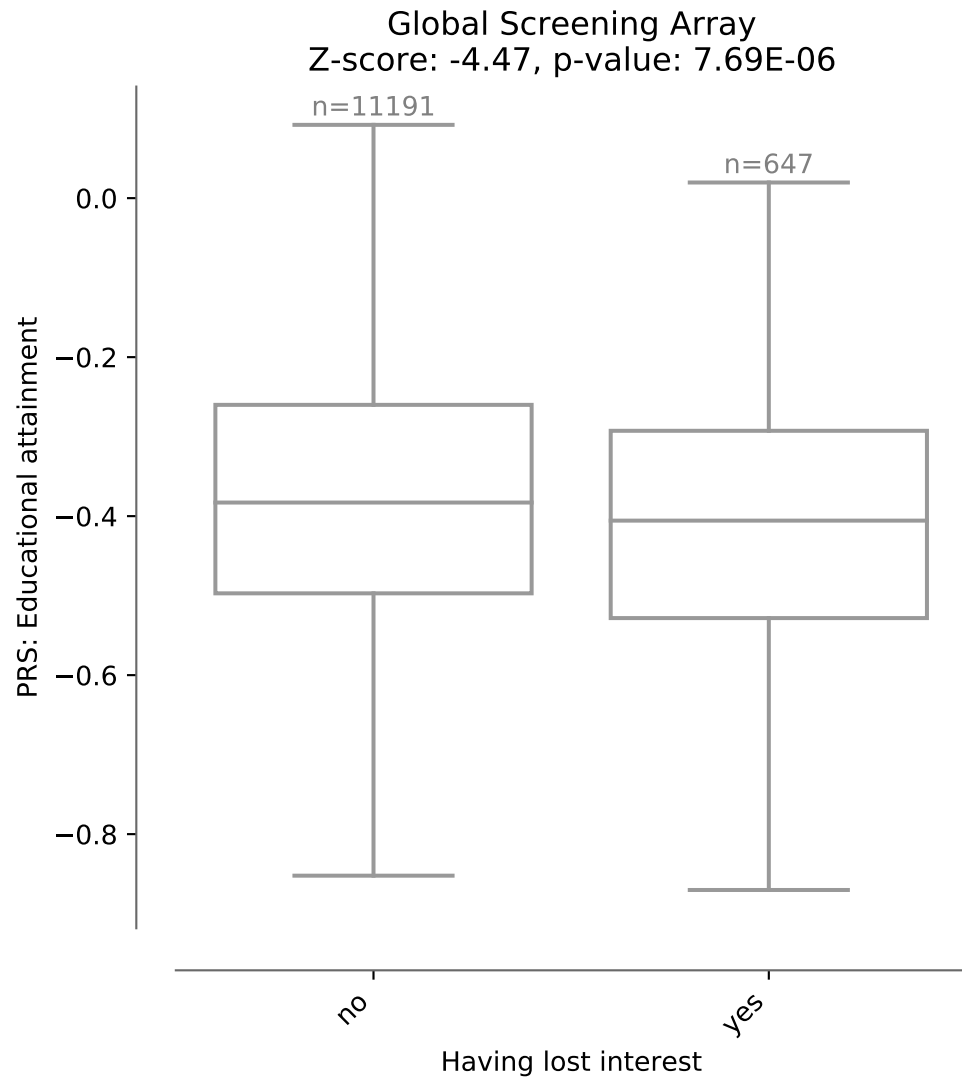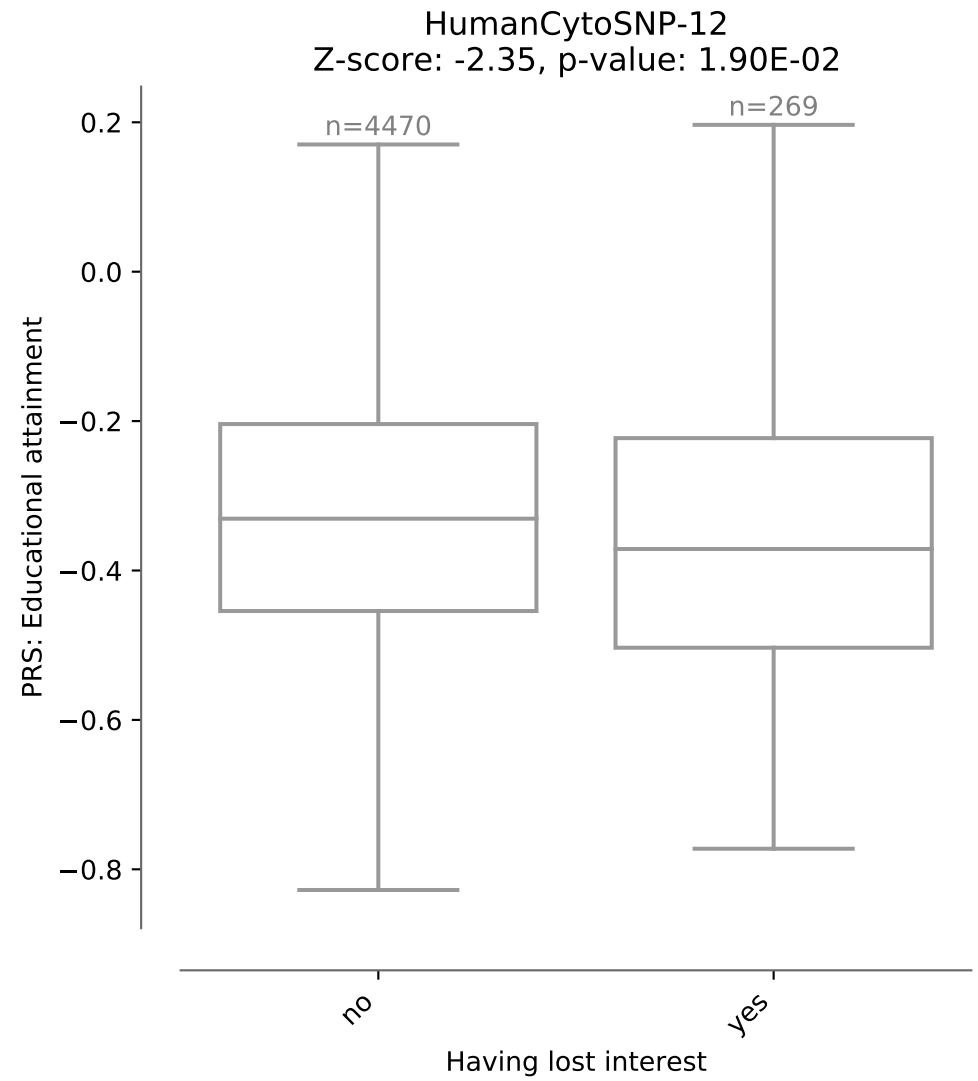

Having lost interest  
PGS: Life satisfaction  
Meta analysis Z-score: -6.47, p-value: 9.83E-11

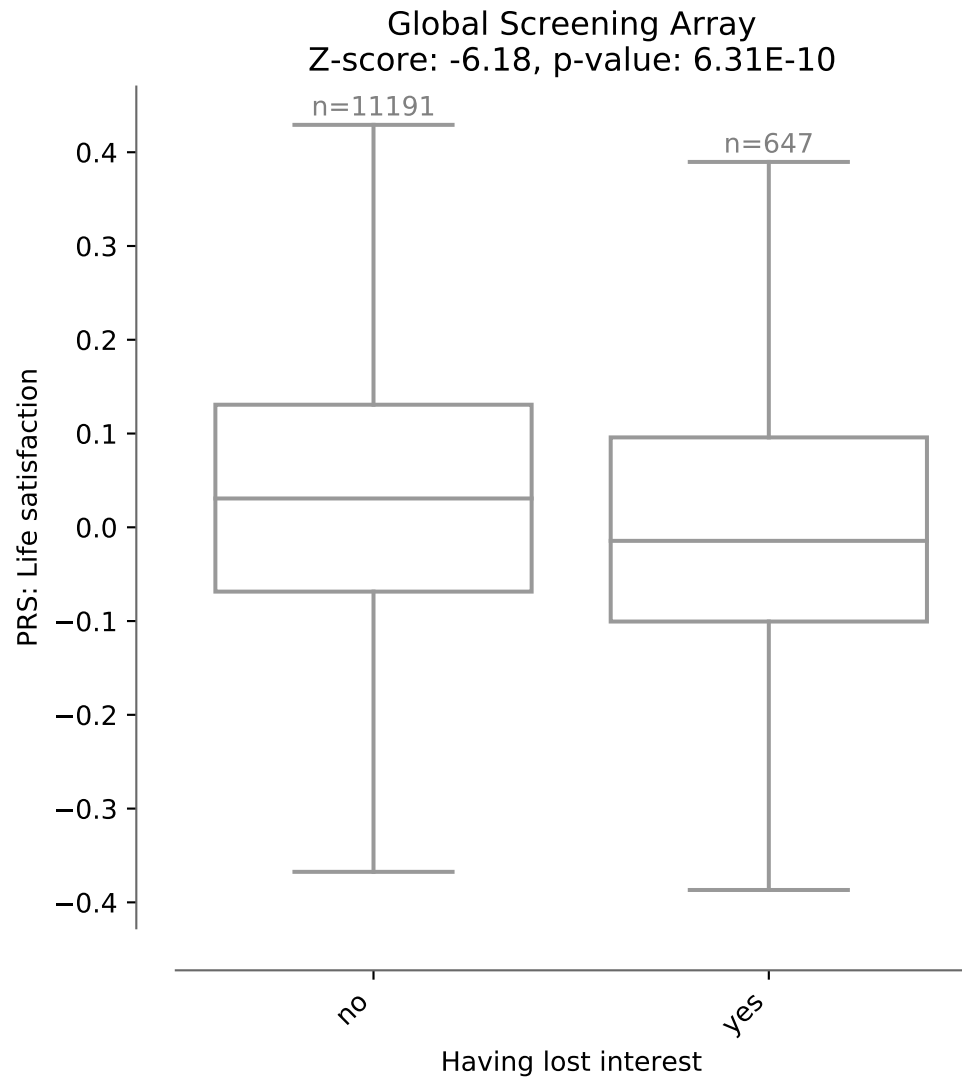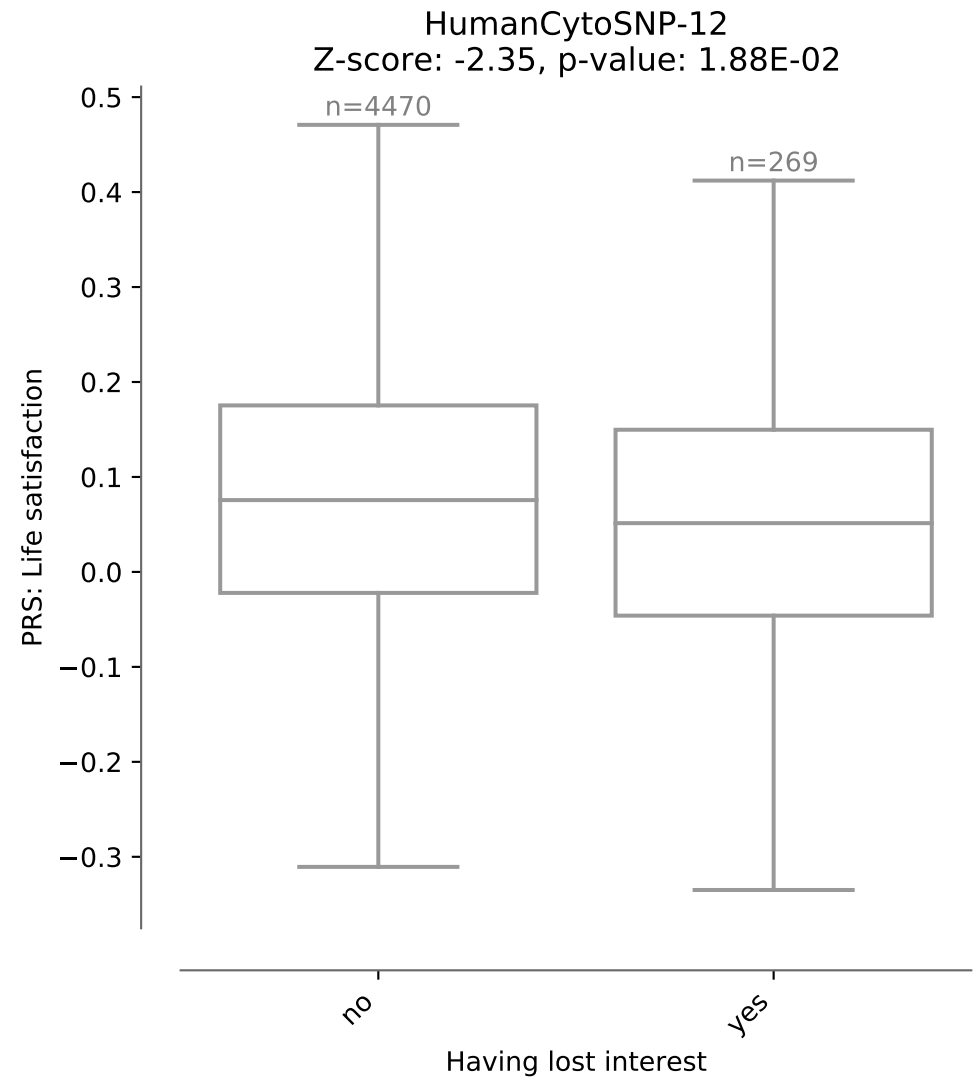



Having lost interest  
PGS: Neuroticism  
Meta analysis Z-score: 5.31, p-value: 1.08E-07

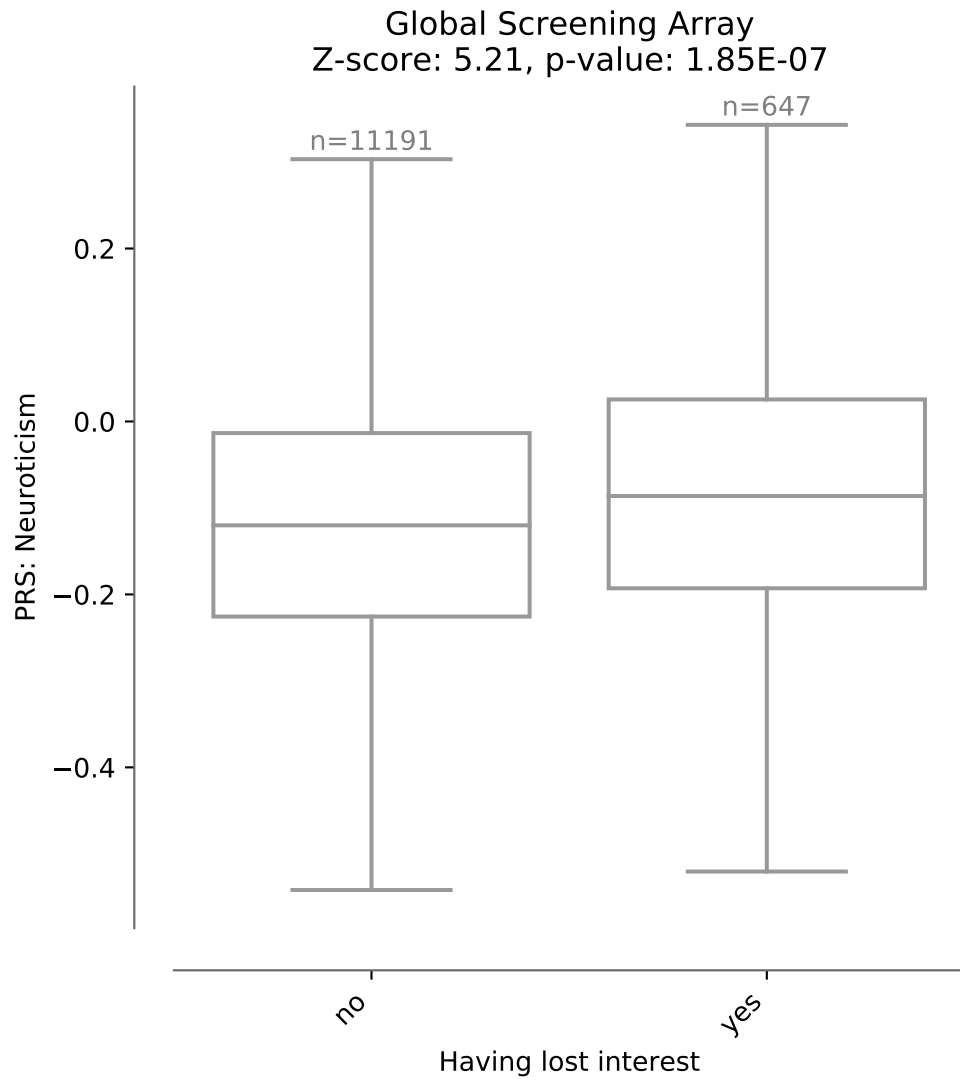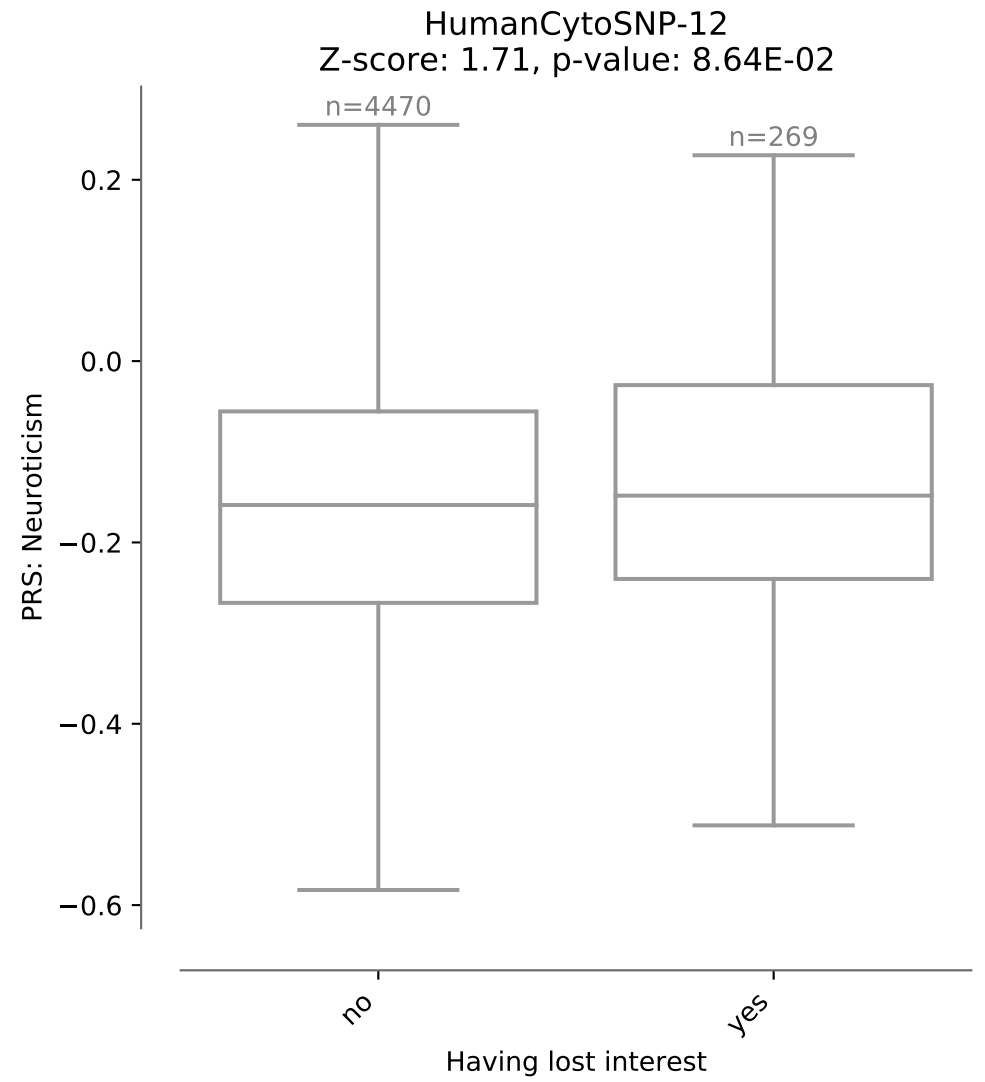

Felt low or depressed often  
PGS: Educational attainment  
Meta analysis Z-score: -5.00, p-value: 5.64E-07

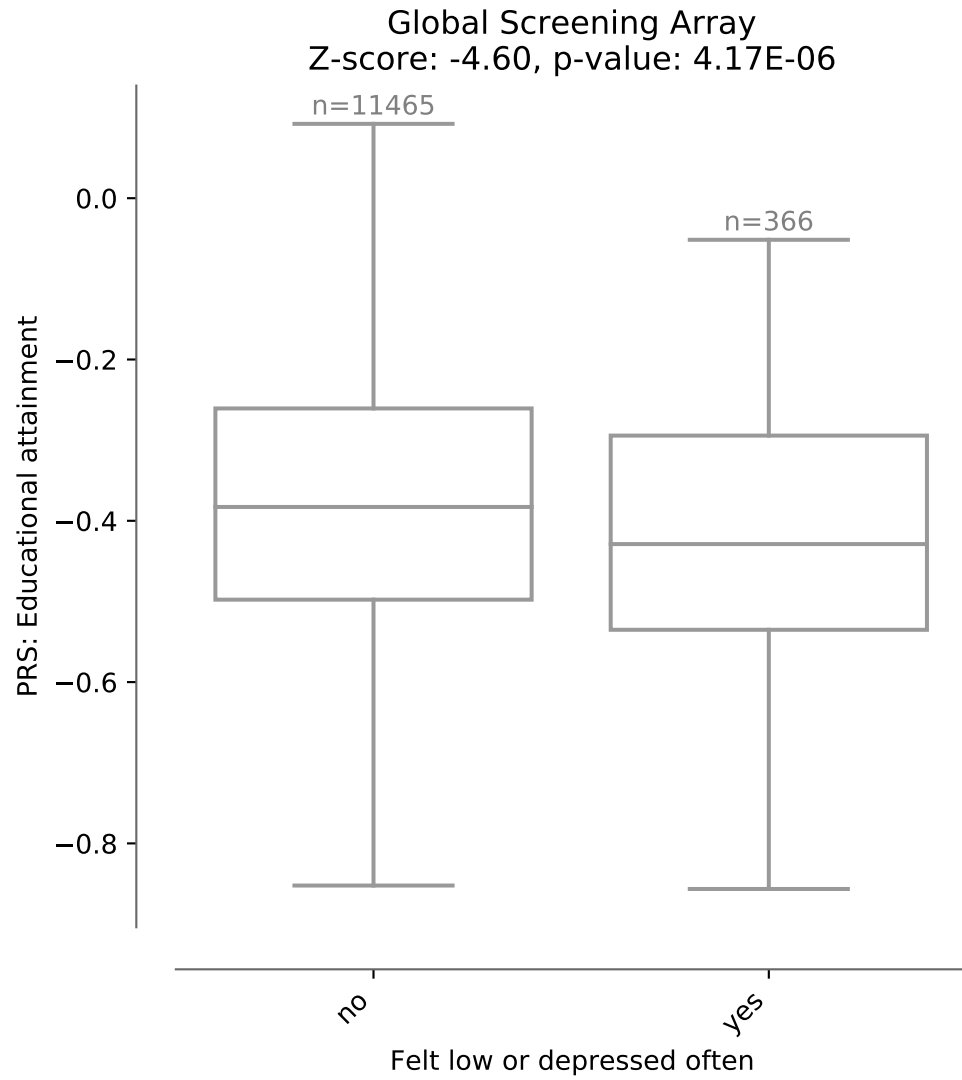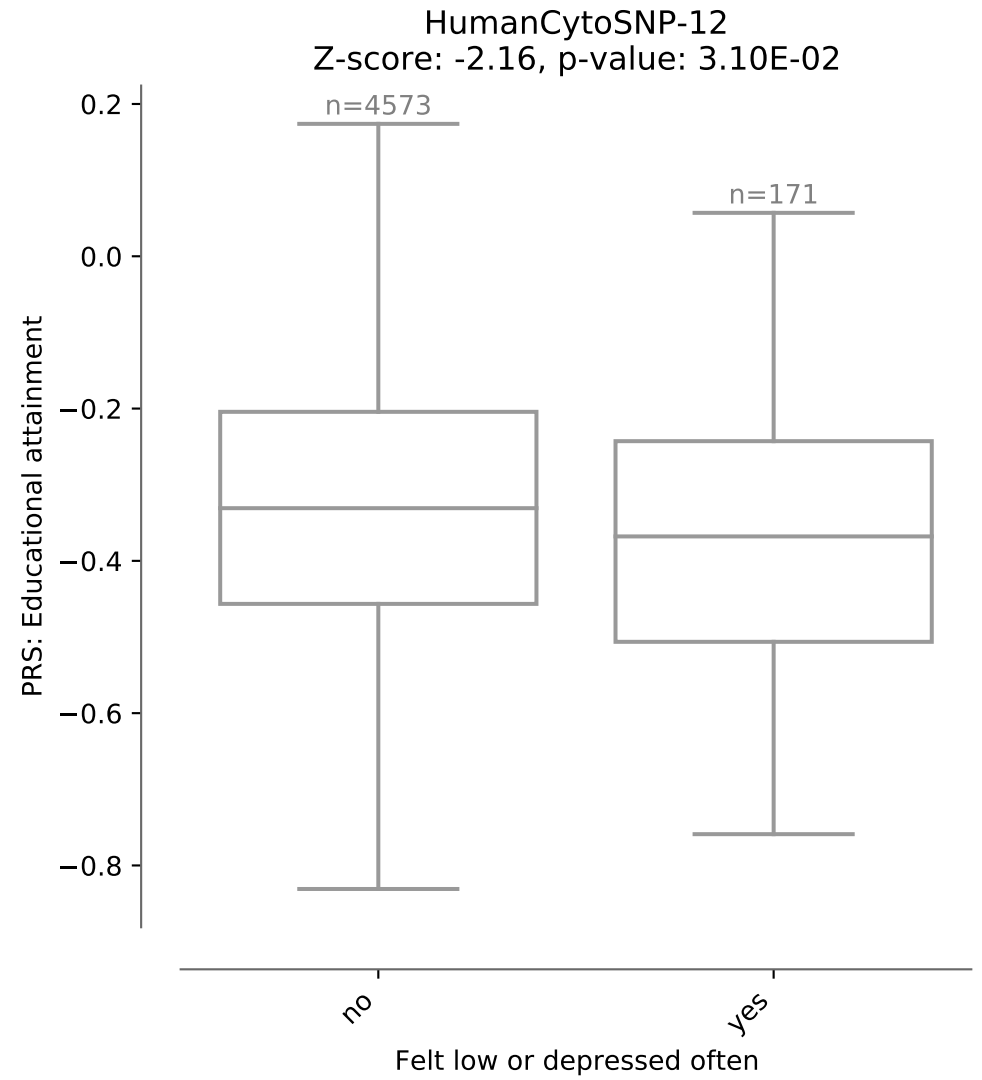

Has someone close with COVID-19  
PGS: Educational attainment  
Meta analysis Z-score: 4.82, p-value: 1.41E-06

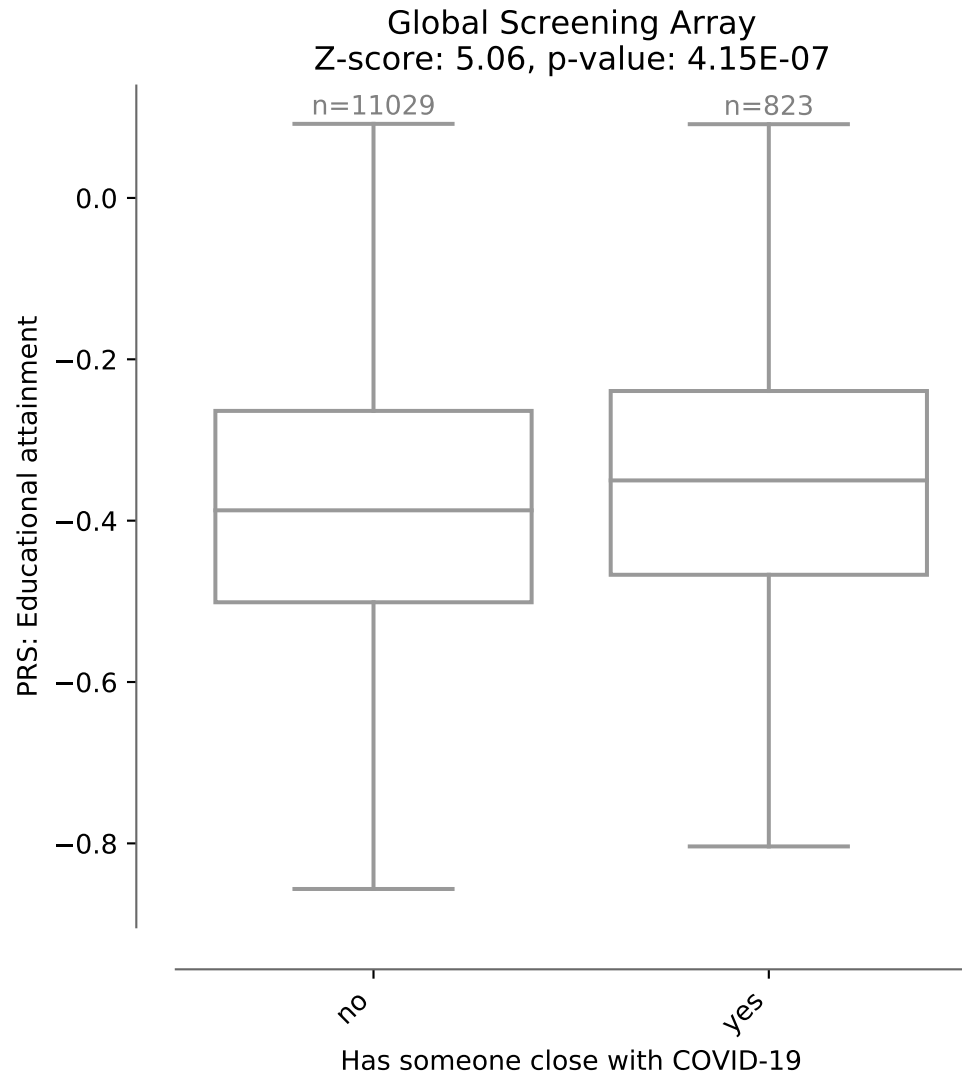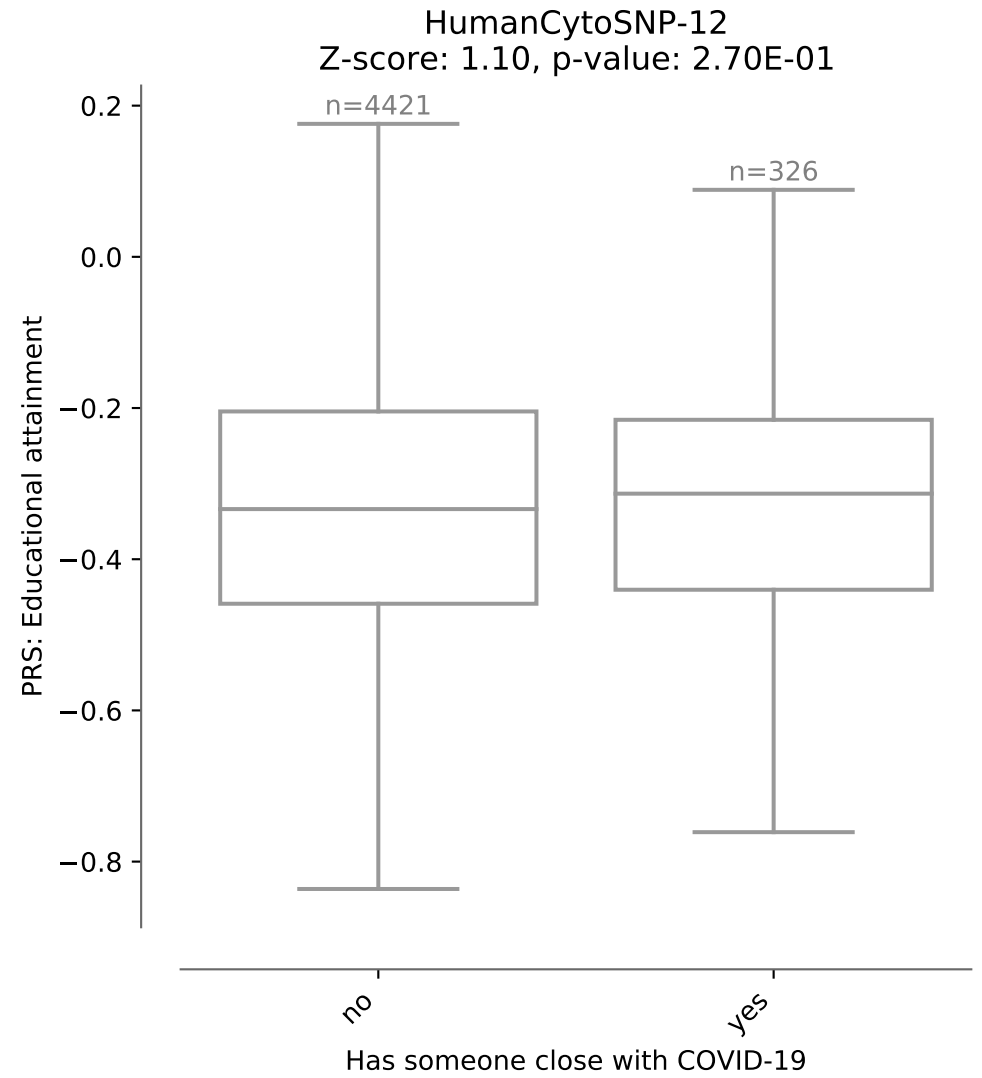

Perceived threat of COVID-19 to Dutch citizen  
PGS: Educational attainment  
Meta analysis Z-score: -6.31, p-value: 2.76E-10

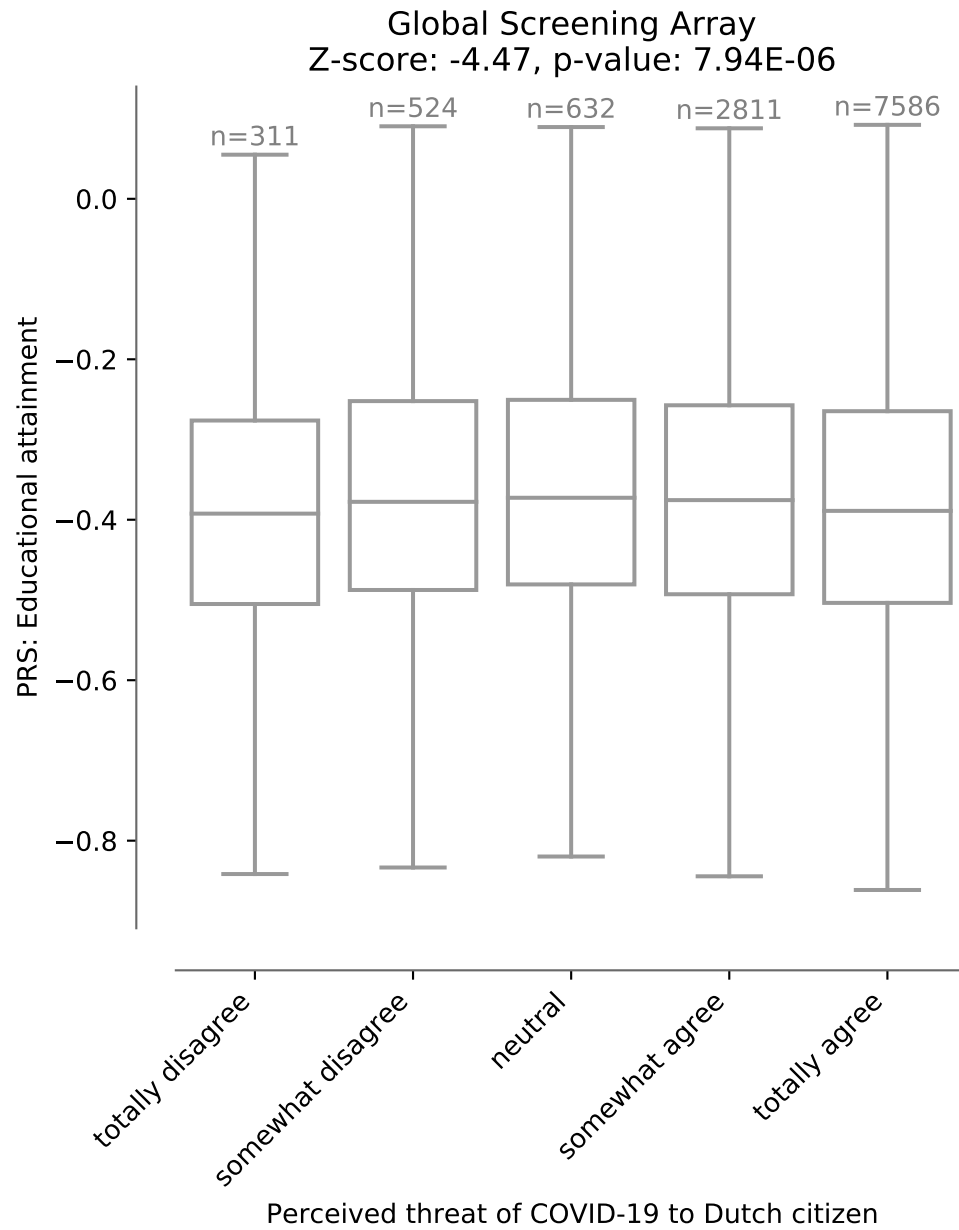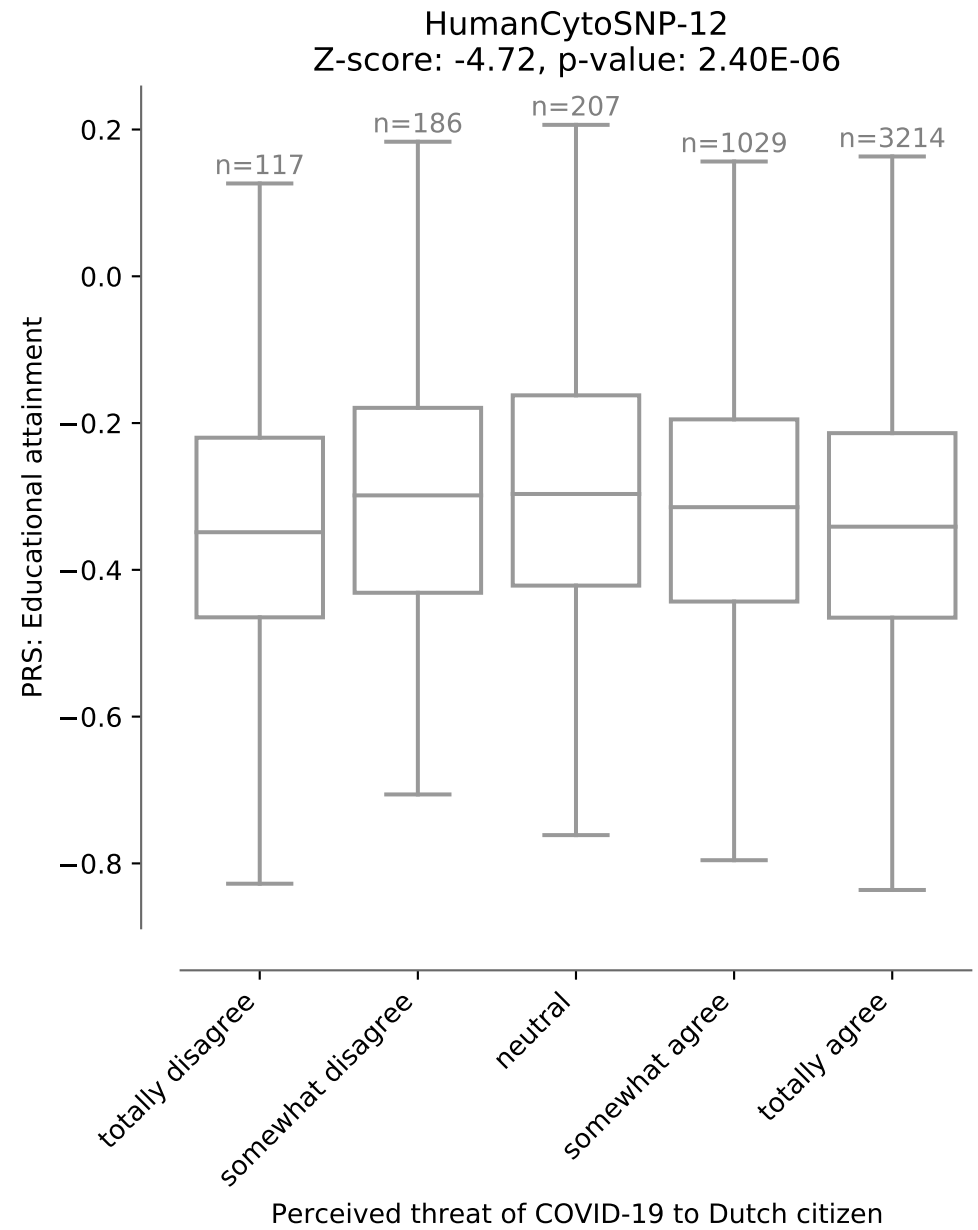

Finding it is justified that young people are addressed as a group to comply the corona measures

PGS: Educational attainment

Meta analysis Z-score: -9.14, p-value: 6.30E-20

Global Screening Array  
Z-score: -6.52, p-value: 6.98E-11

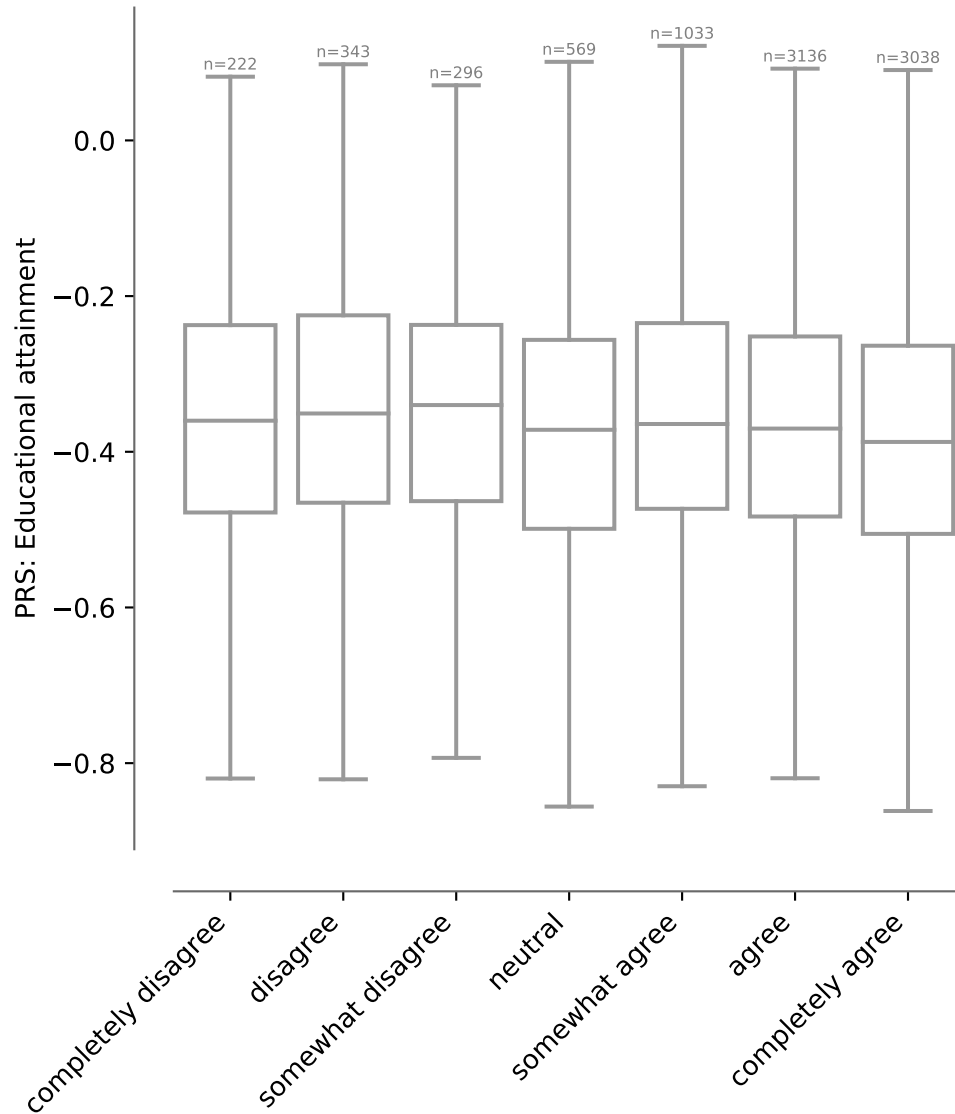

Finding it is justified that young people are addressed as a group to comply the corona measures

HumanCytoSNP-12  
Z-score: -6.69, p-value: 2.27E-11

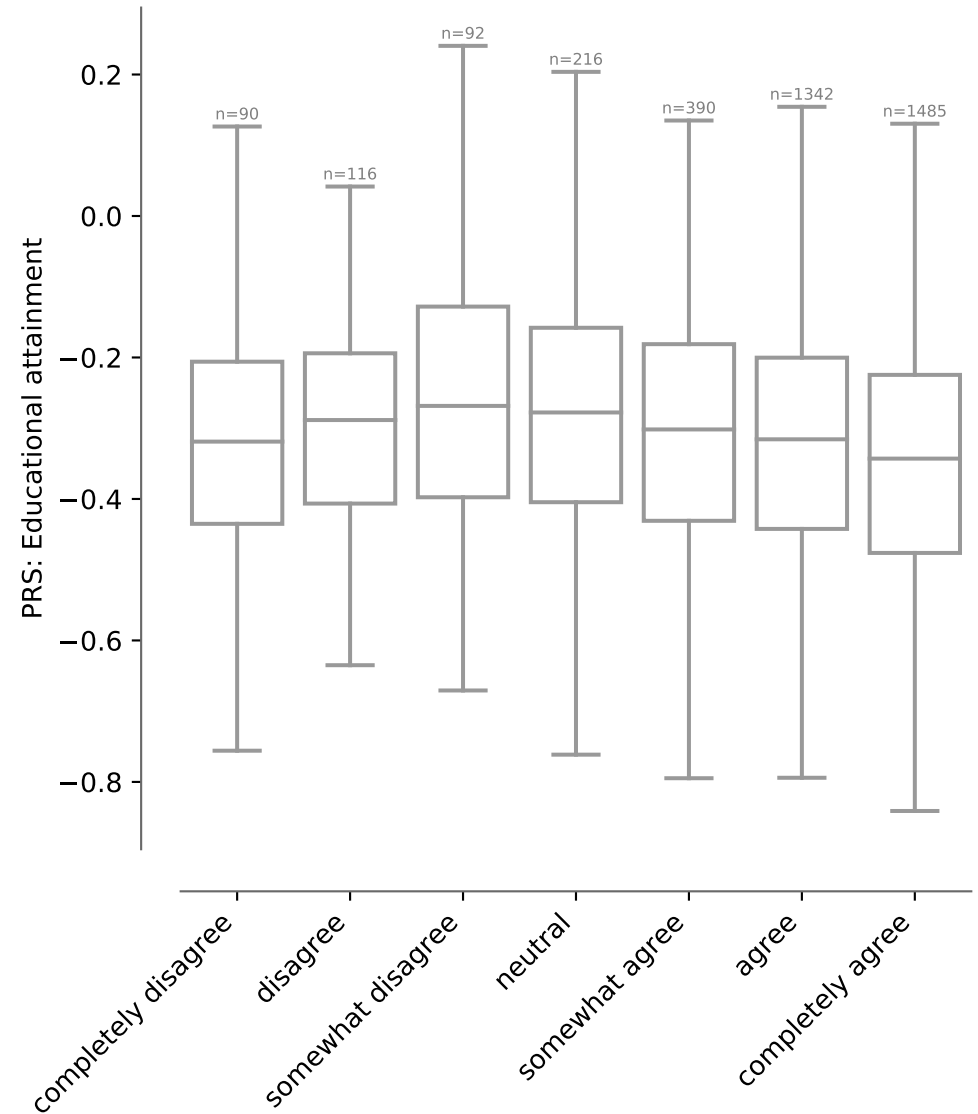

Finding it is justified that young people are addressed as a group to comply the corona measures

Finding vaccines contribute to the return to the normal living situation

PGS: Educational attainment

Meta analysis Z-score: 6.00, p-value: 1.92E-09

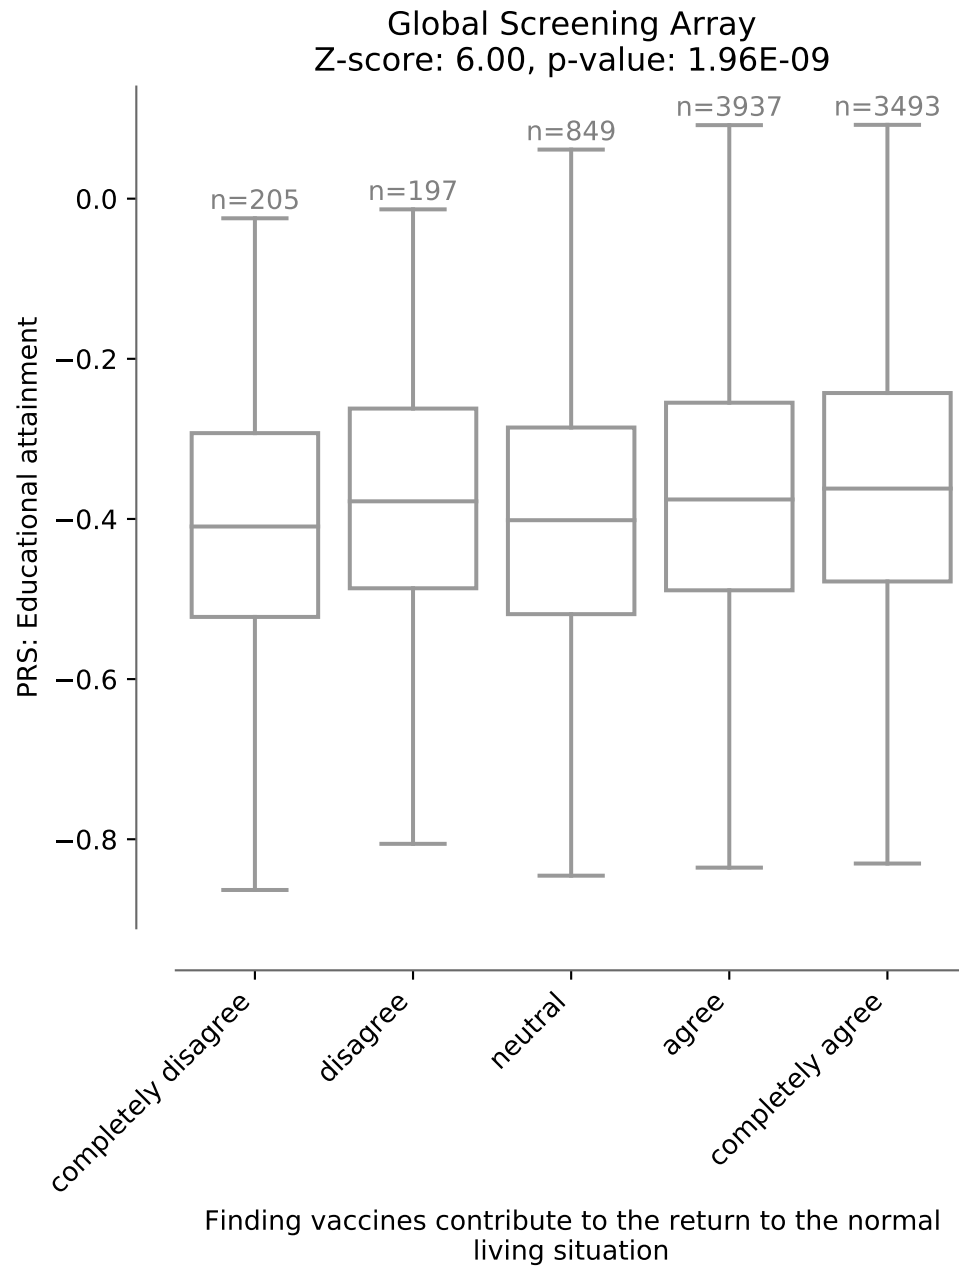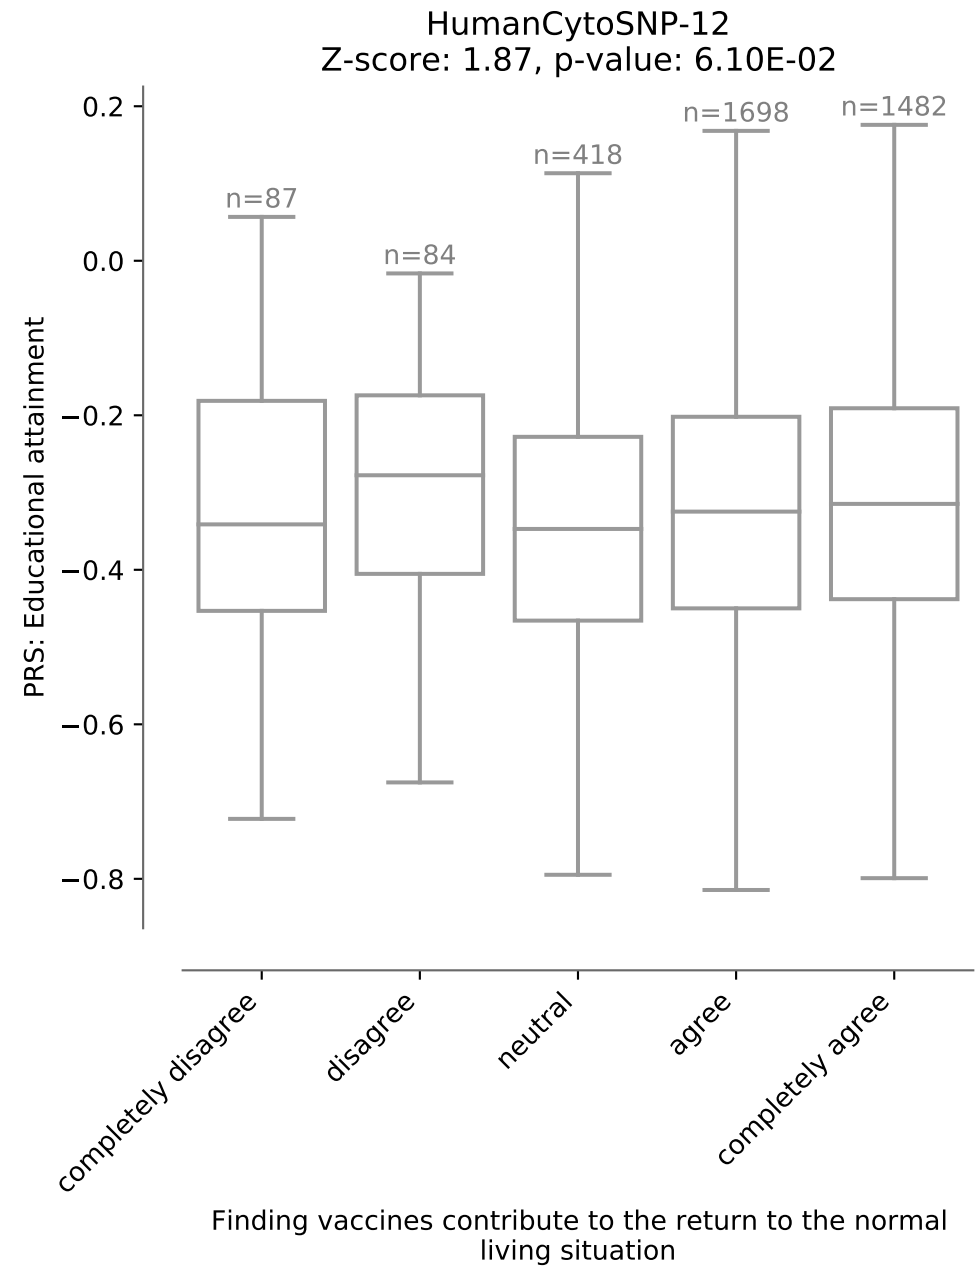

Finding the pre-defined roadmap for the corona measures gives peace of mind

PGS: Educational attainment

Meta analysis Z-score: -5.01, p-value: 5.42E-07

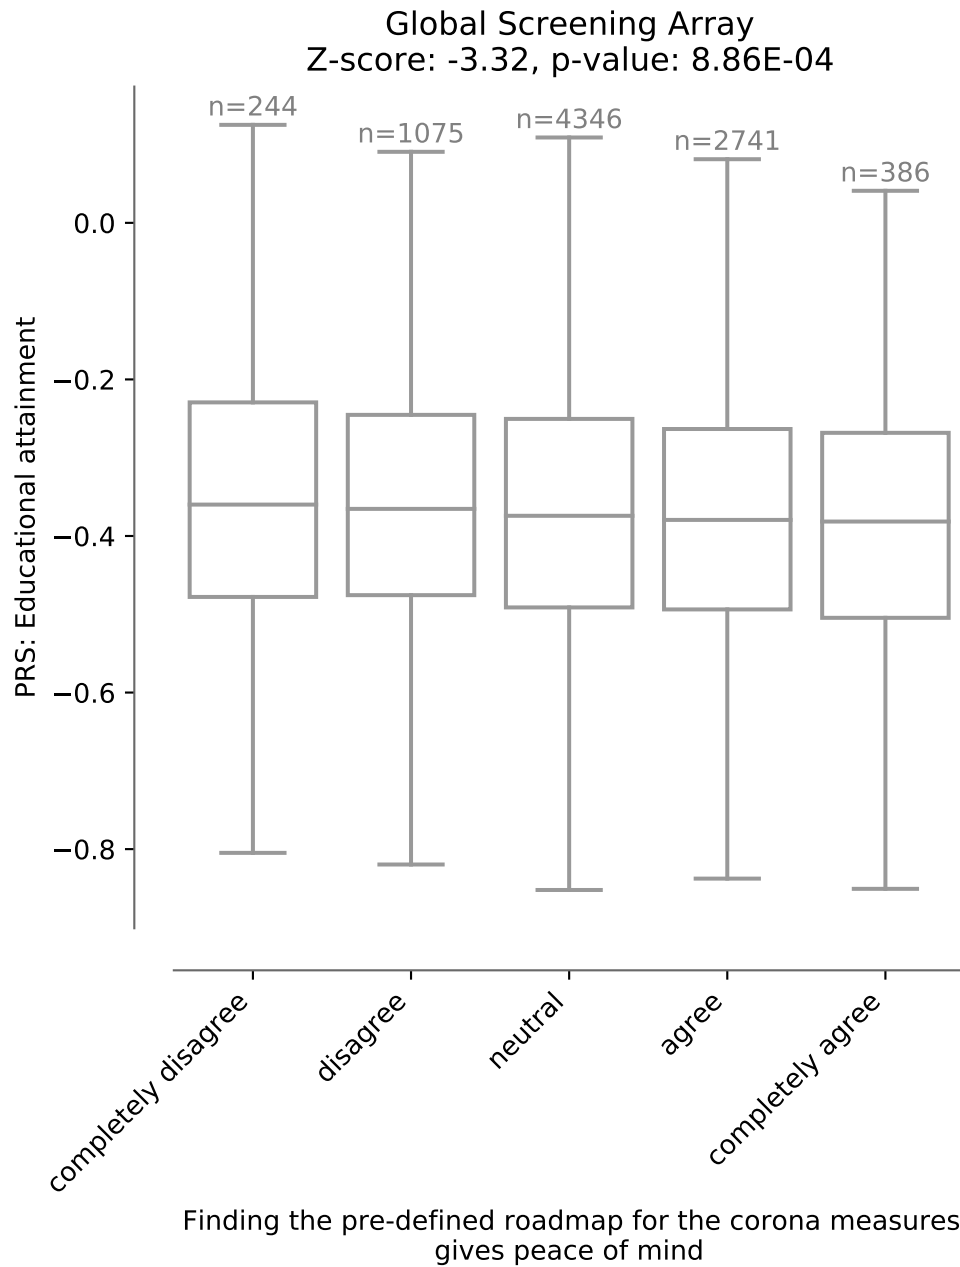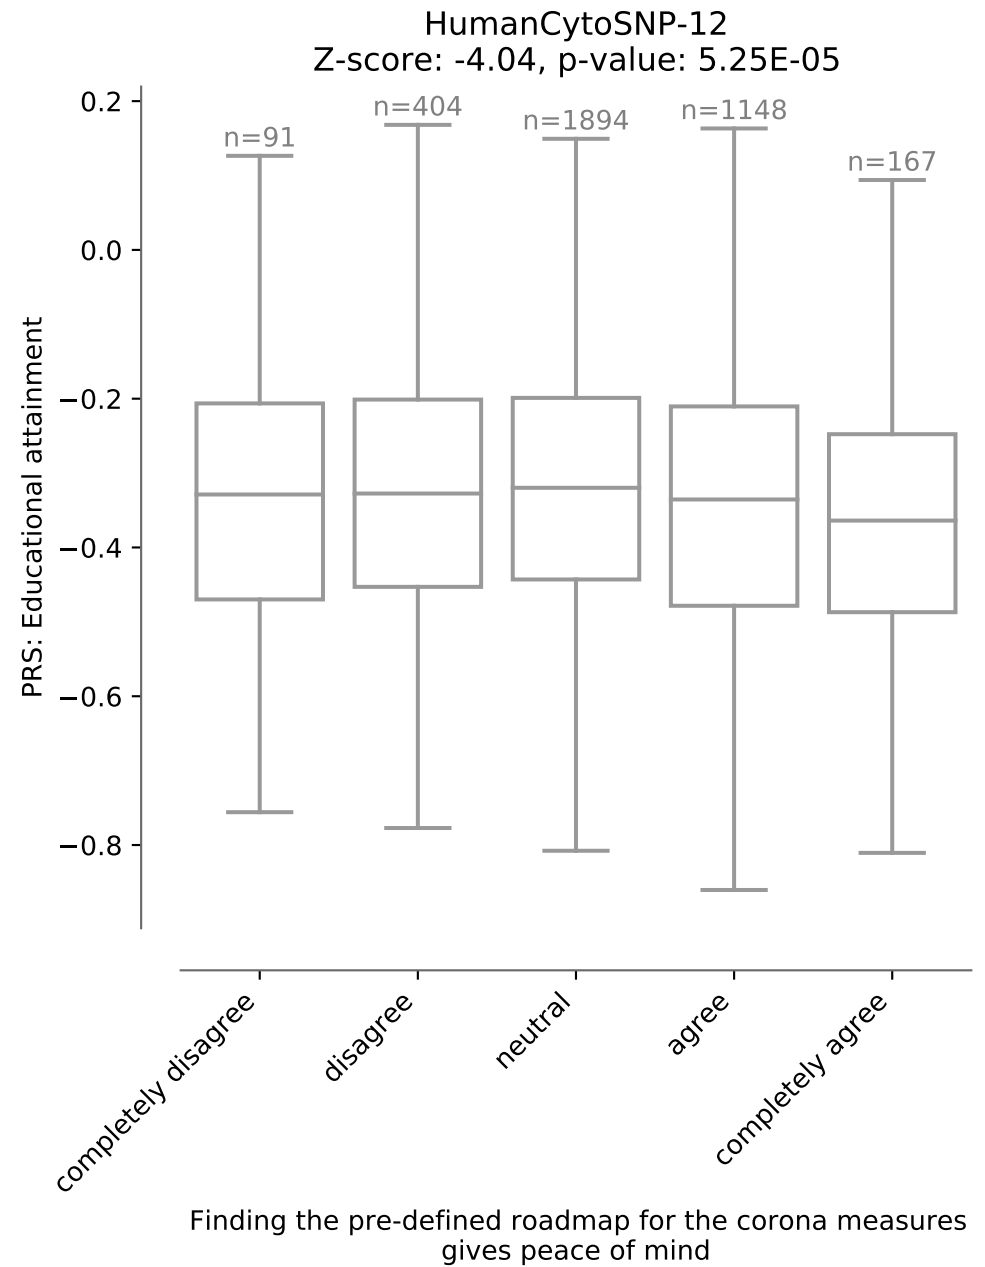

Washed hands more than six times per day  
PGS: Educational attainment  
Meta analysis Z-score: -6.01, p-value: 1.90E-09

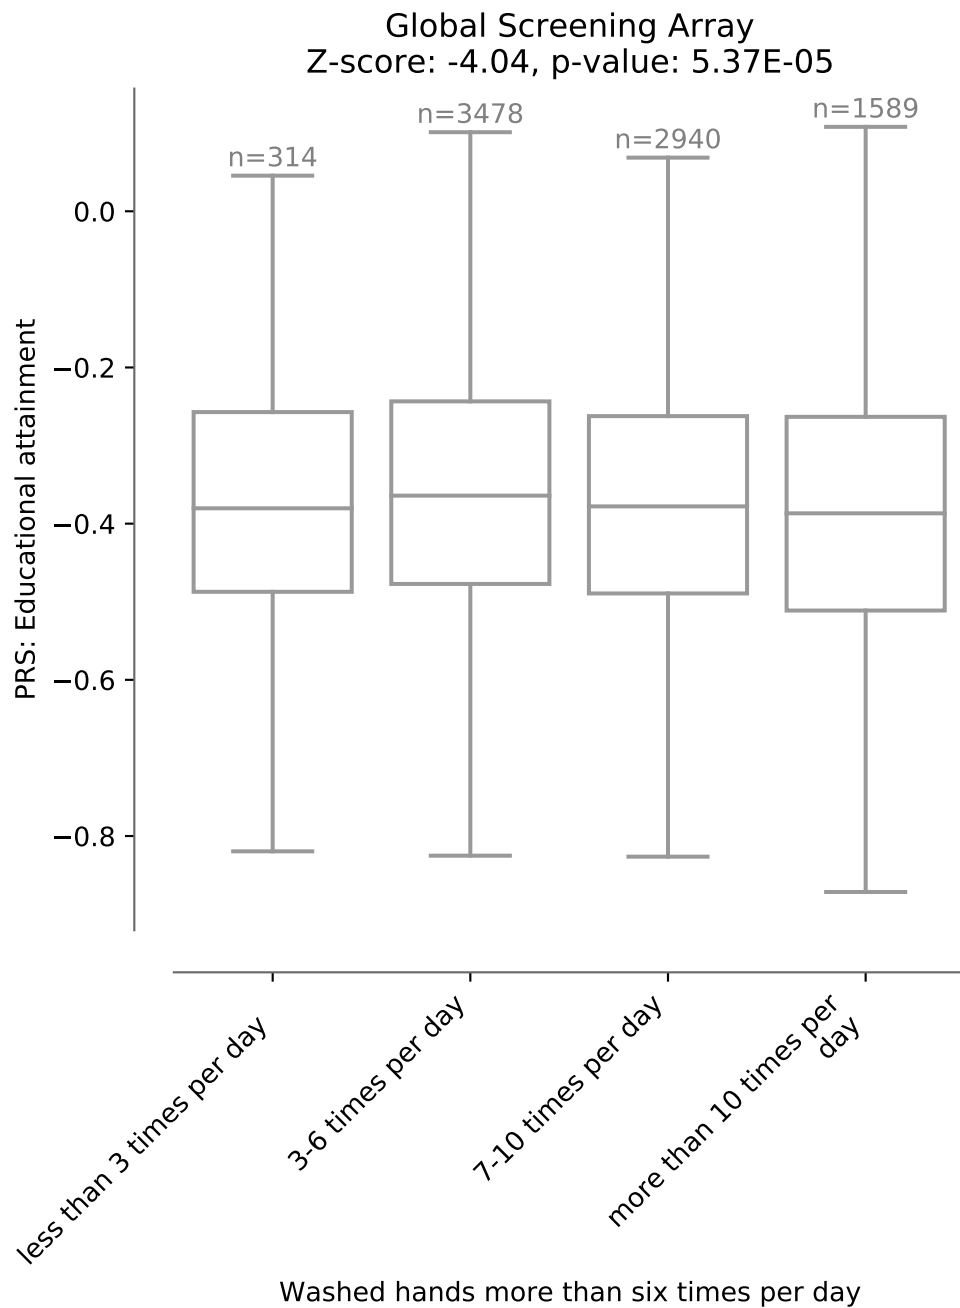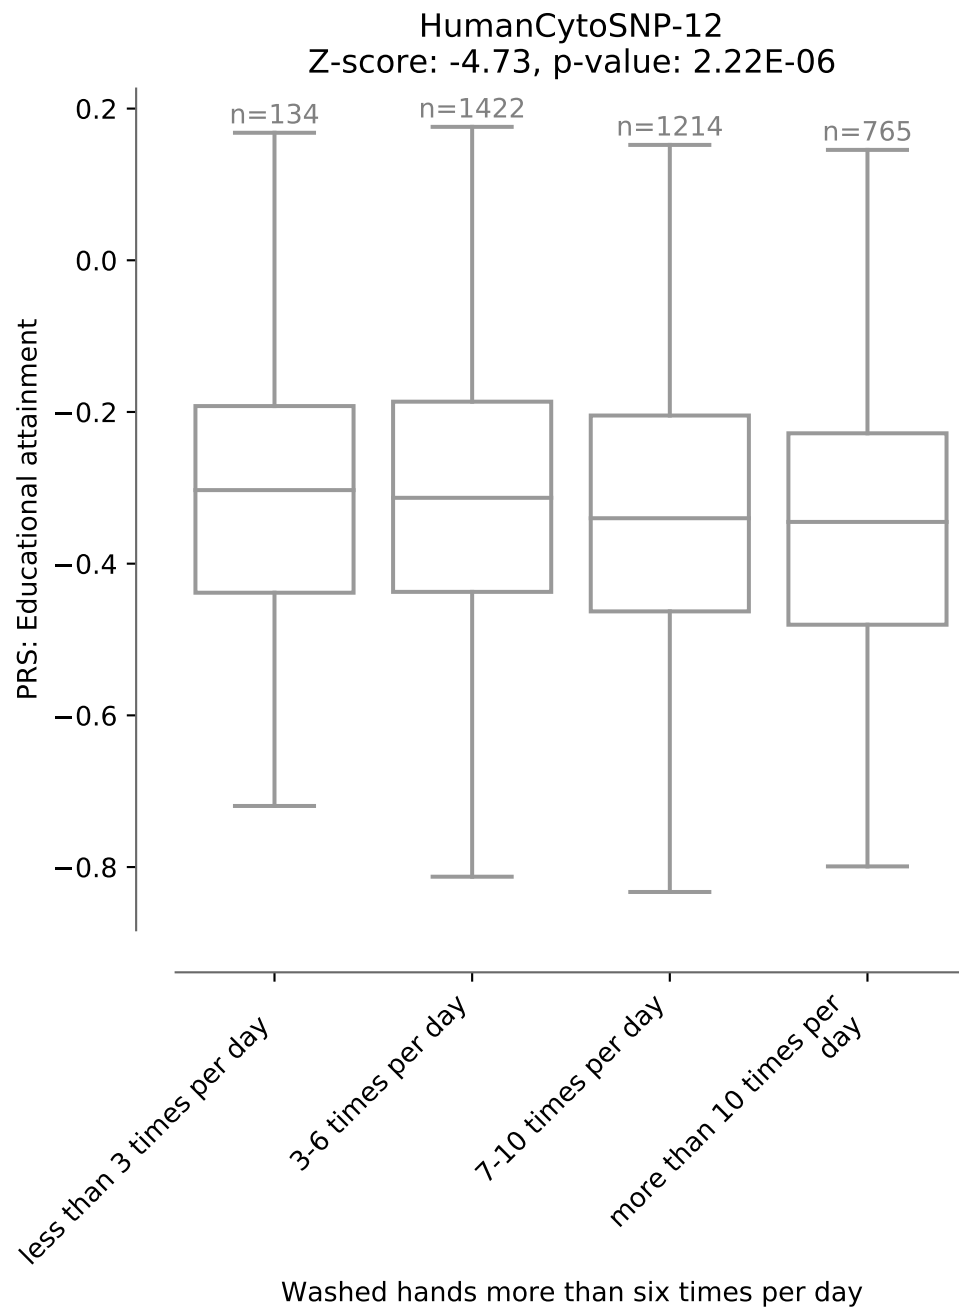



Use of public transport before corona  
PGS: Autism spectrum disorder (ASD)  
Meta analysis Z-score: 5.39, p-value: 6.95E-08

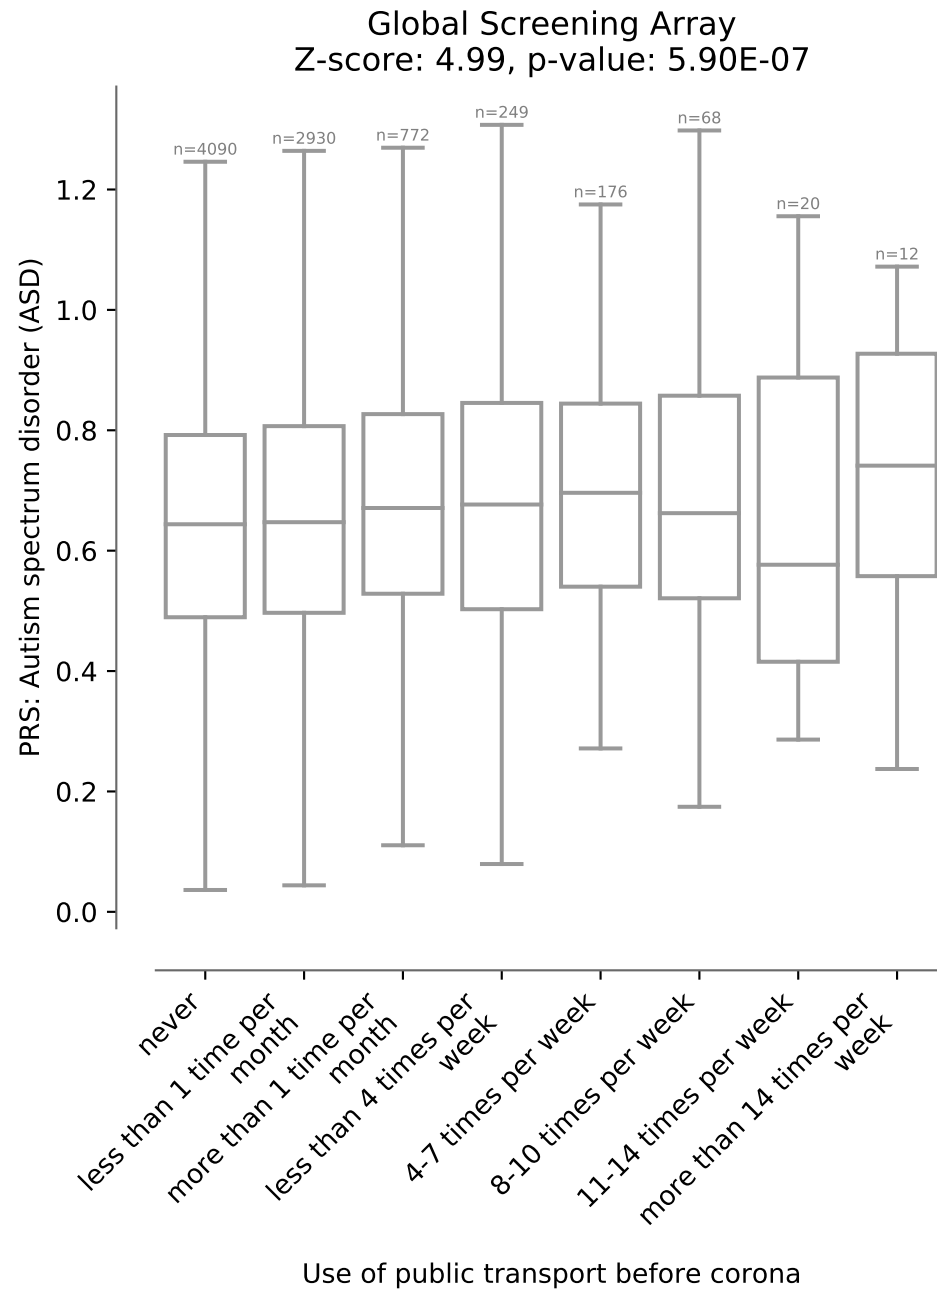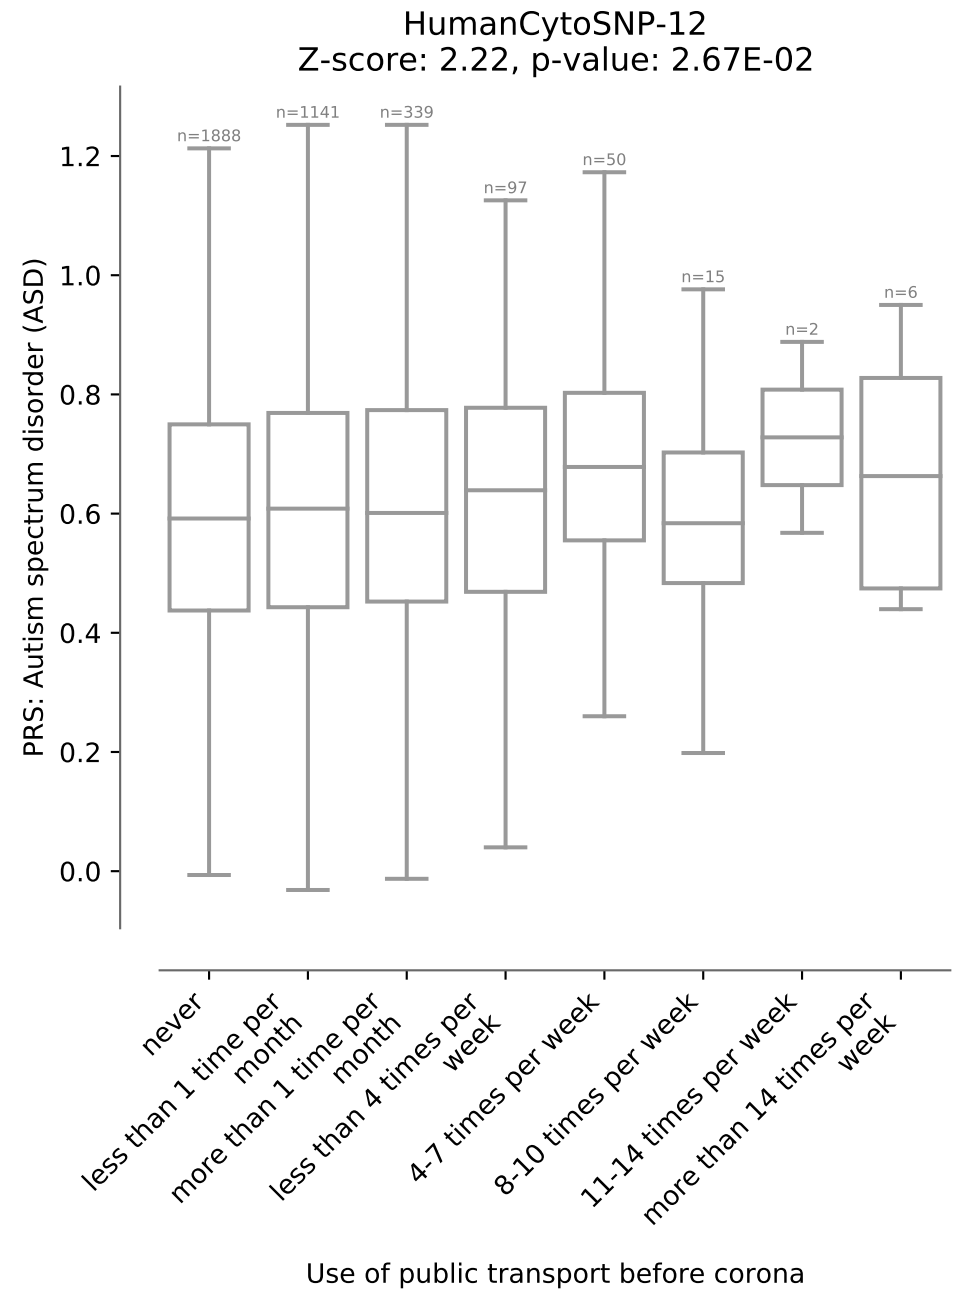

Use of public transport before corona  
PGS: Educational attainment  
Meta analysis Z-score: 12.42, p-value: 2.15E-35

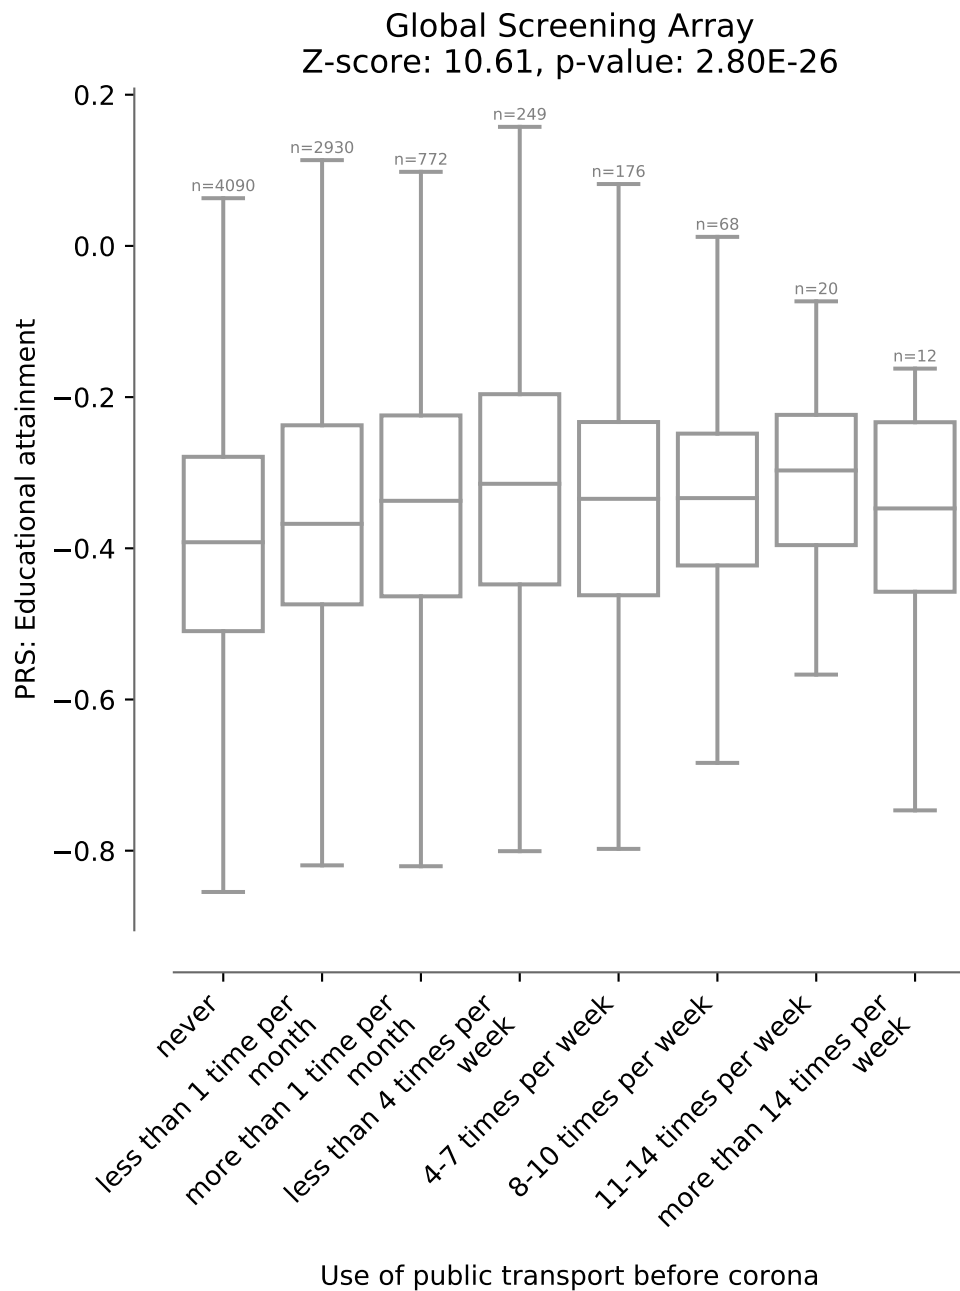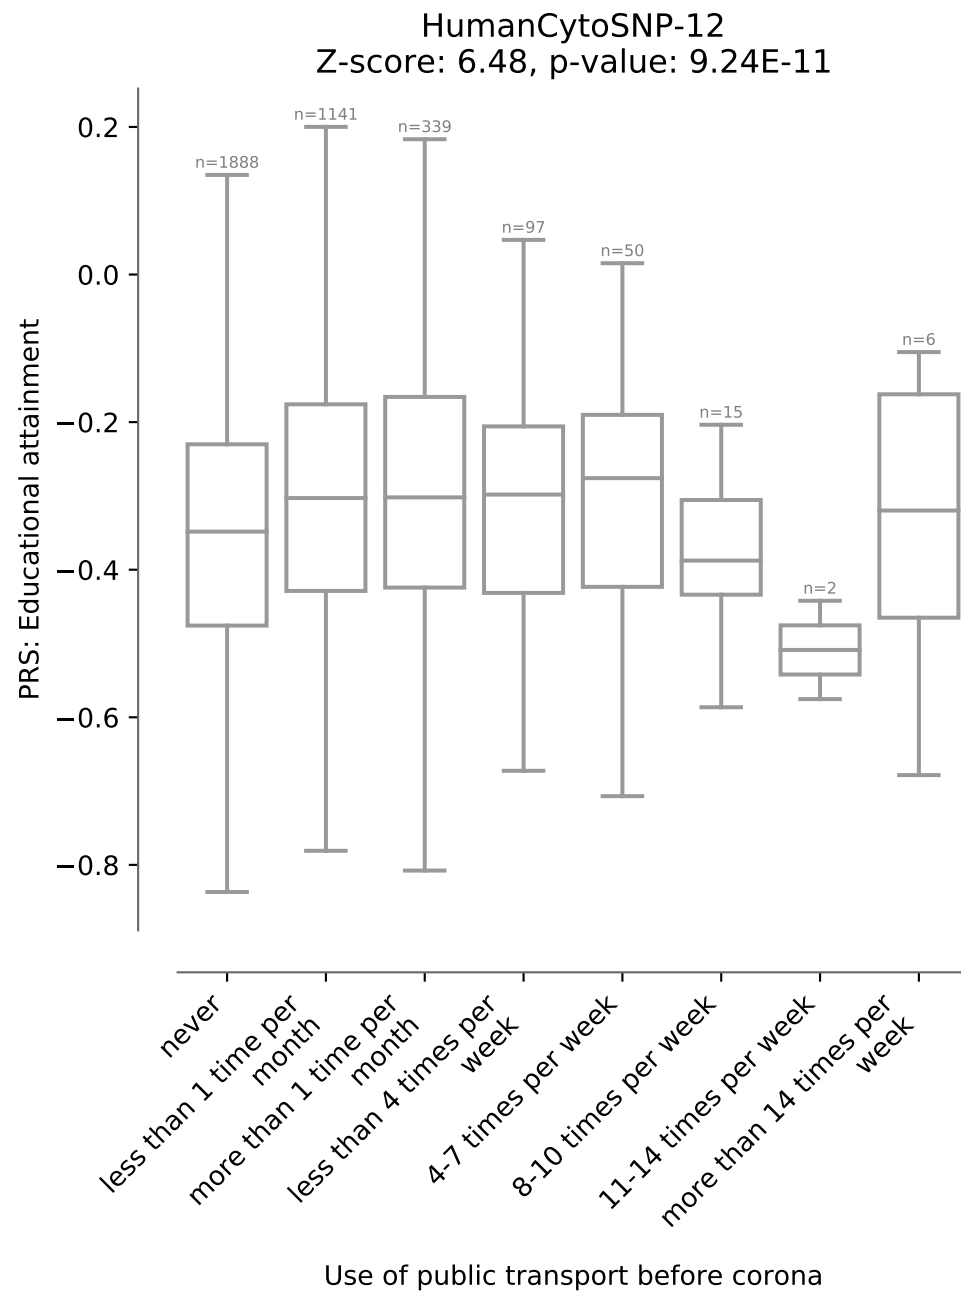

Use of public transport before corona  
PGS: Schizophrenia  
Meta analysis Z-score: 4.75, p-value: 2.03E-06

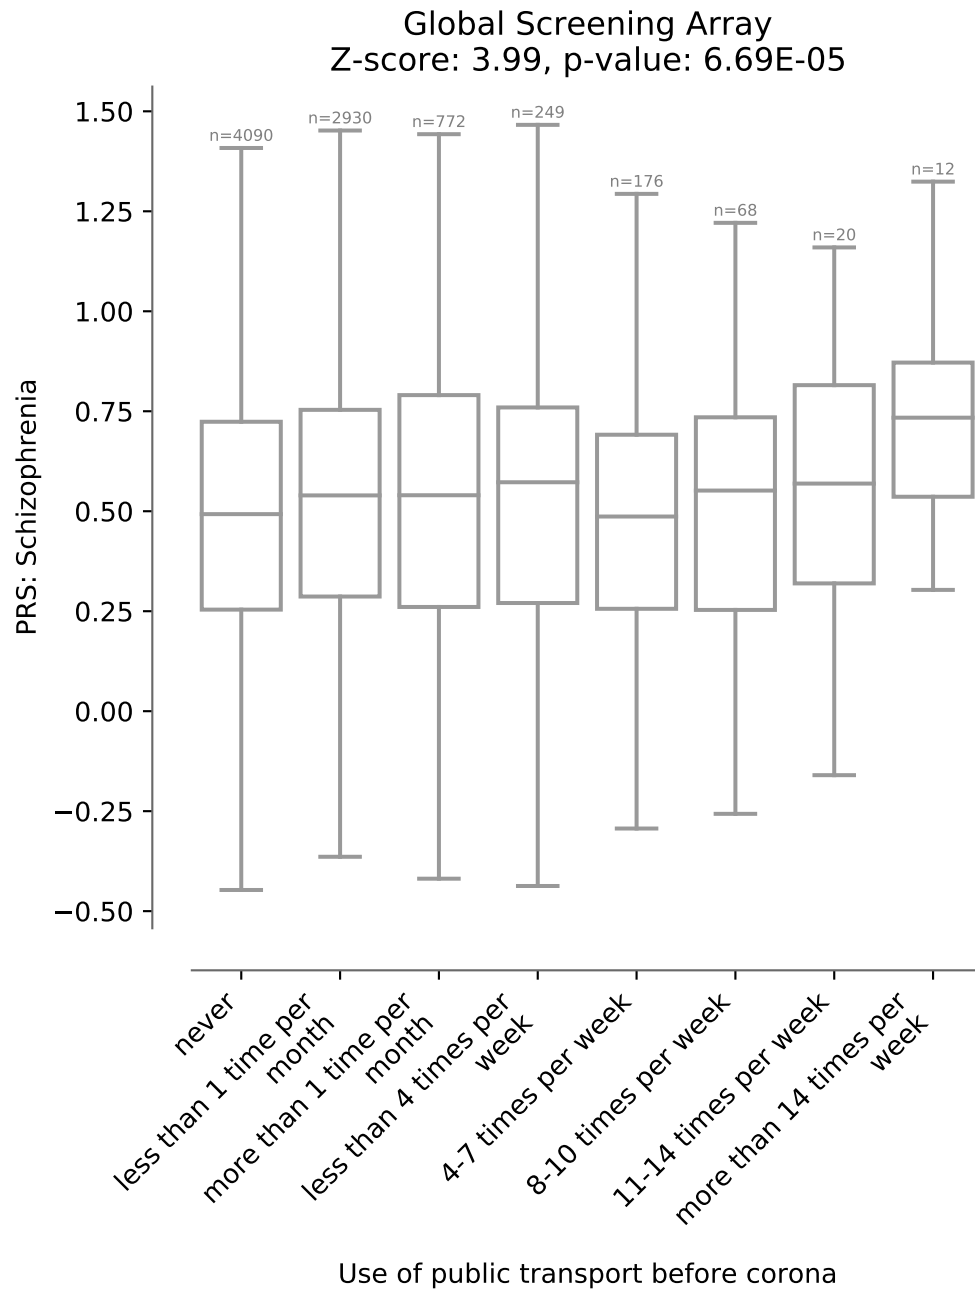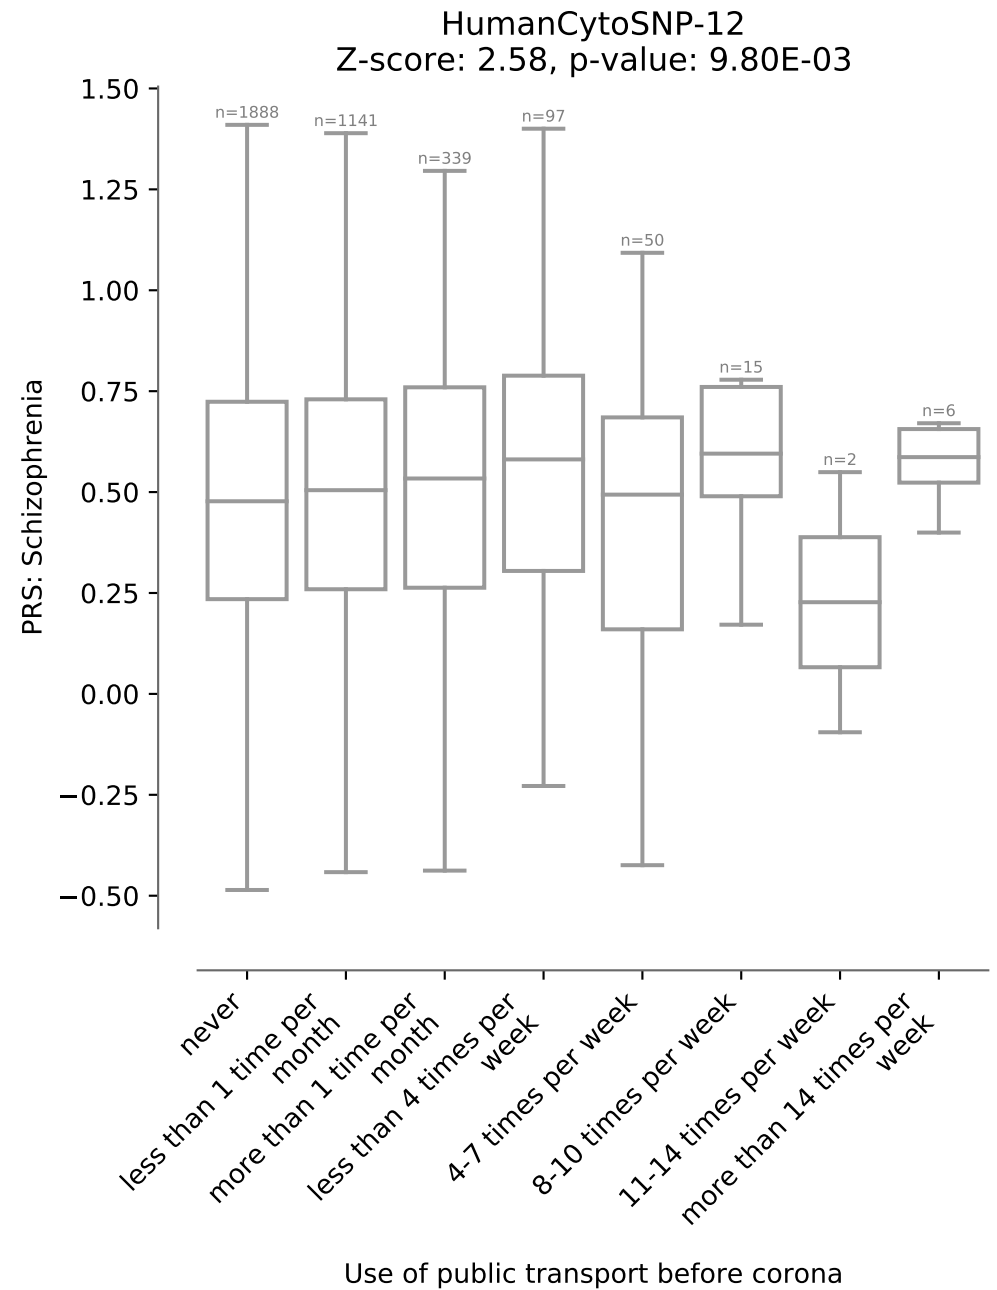

Current use of public transport  
PGS: Educational attainment  
Meta analysis Z-score: 7.18, p-value: 7.16E-13

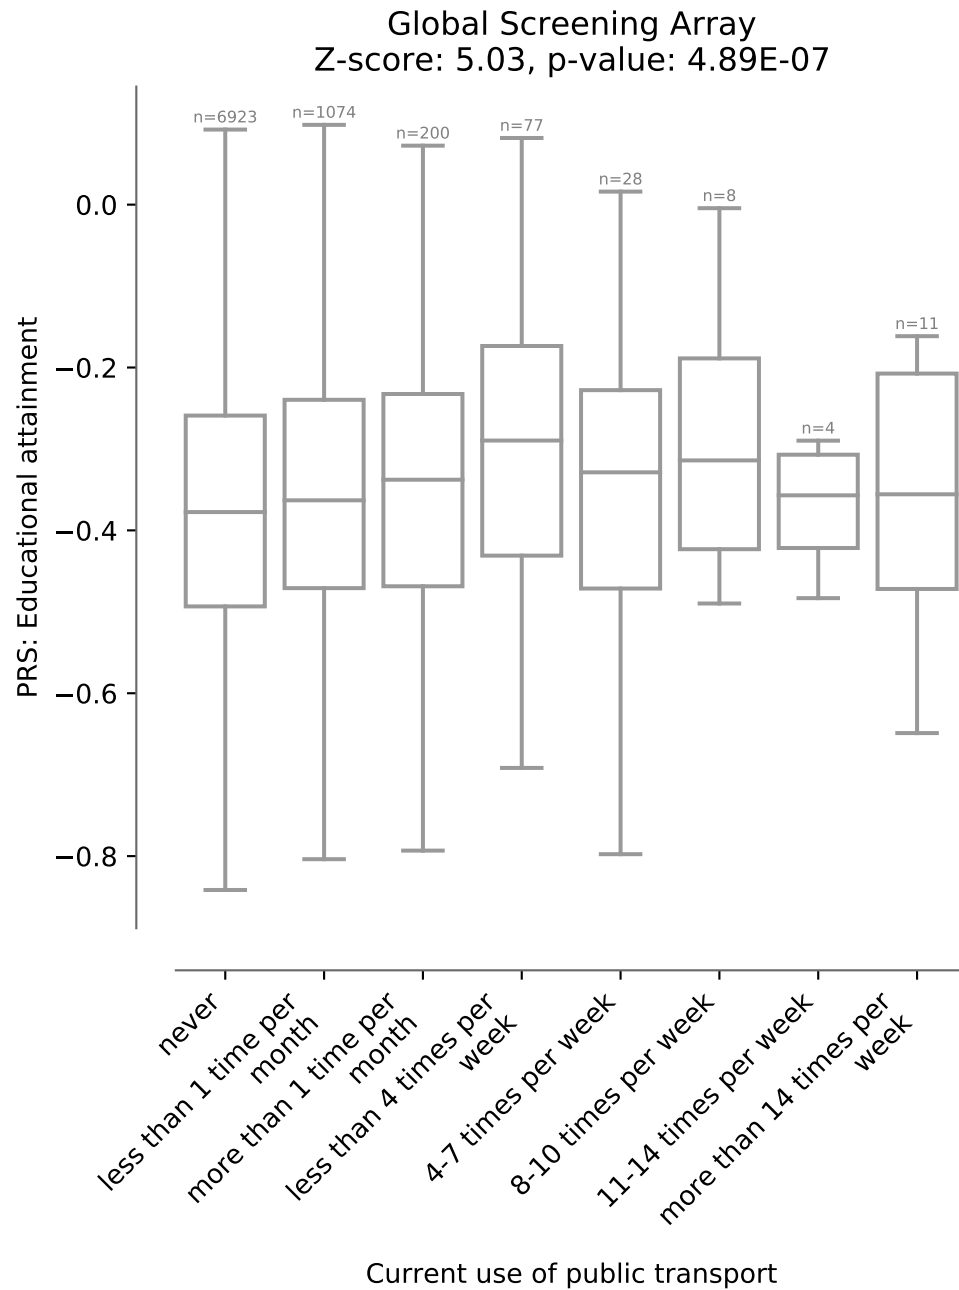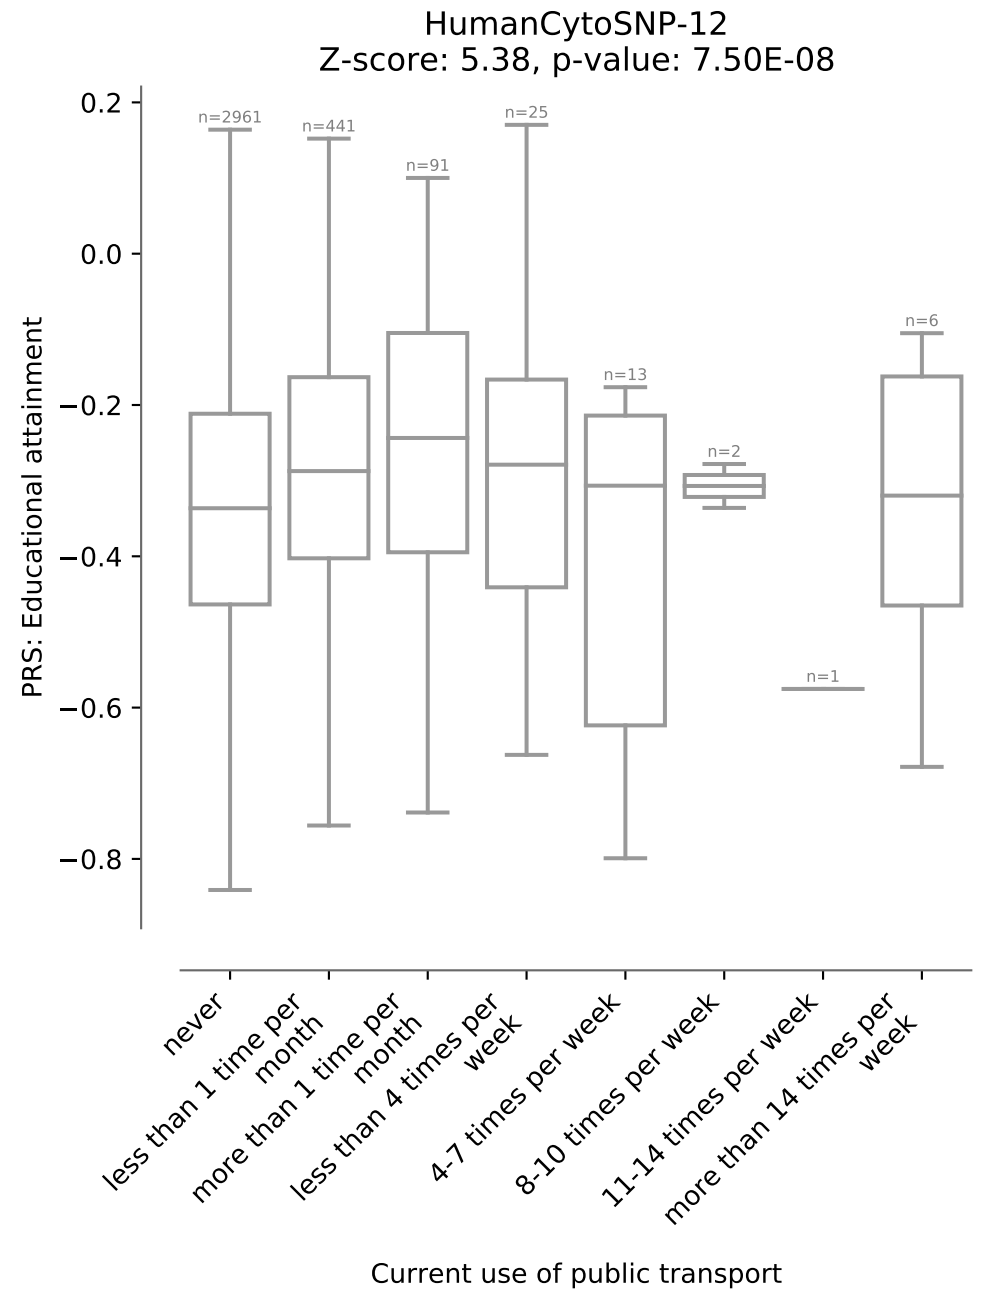

Felt isolated  
PGS: Life satisfaction  
Meta analysis Z-score: -5.09, p-value: 3.67E-07

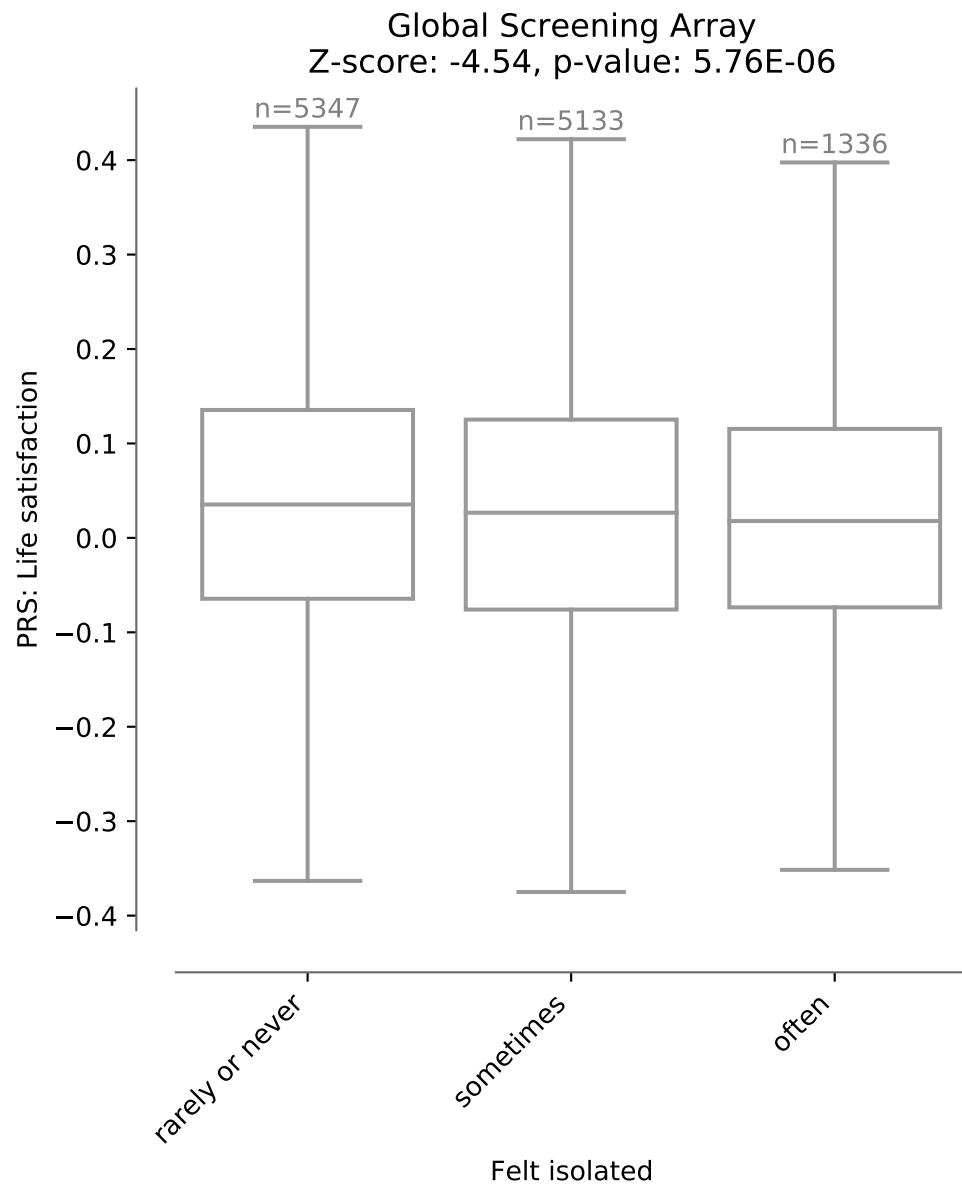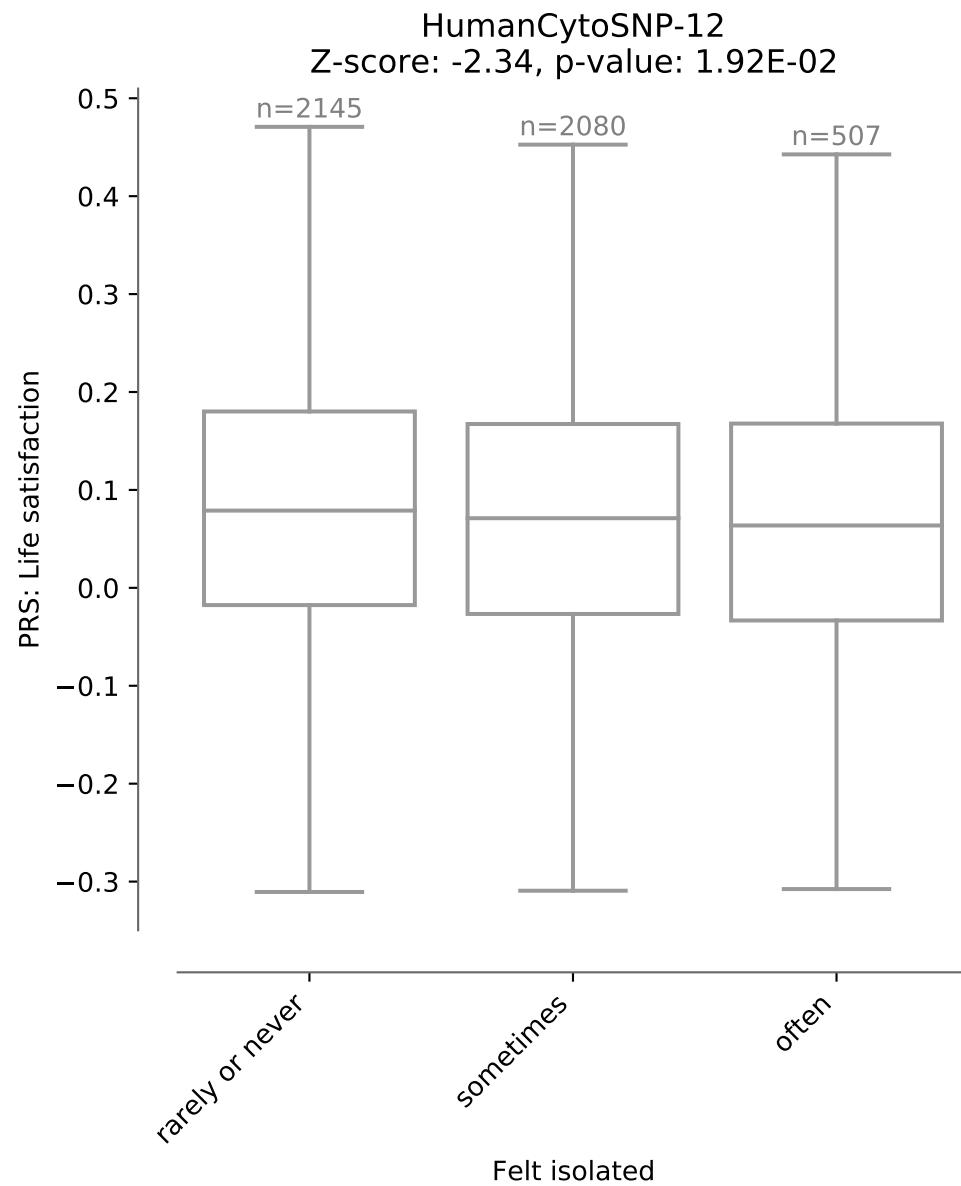

Felt isolated  
PGS: Neuroticism  
Meta analysis Z-score: 4.48, p-value: 7.42E-06

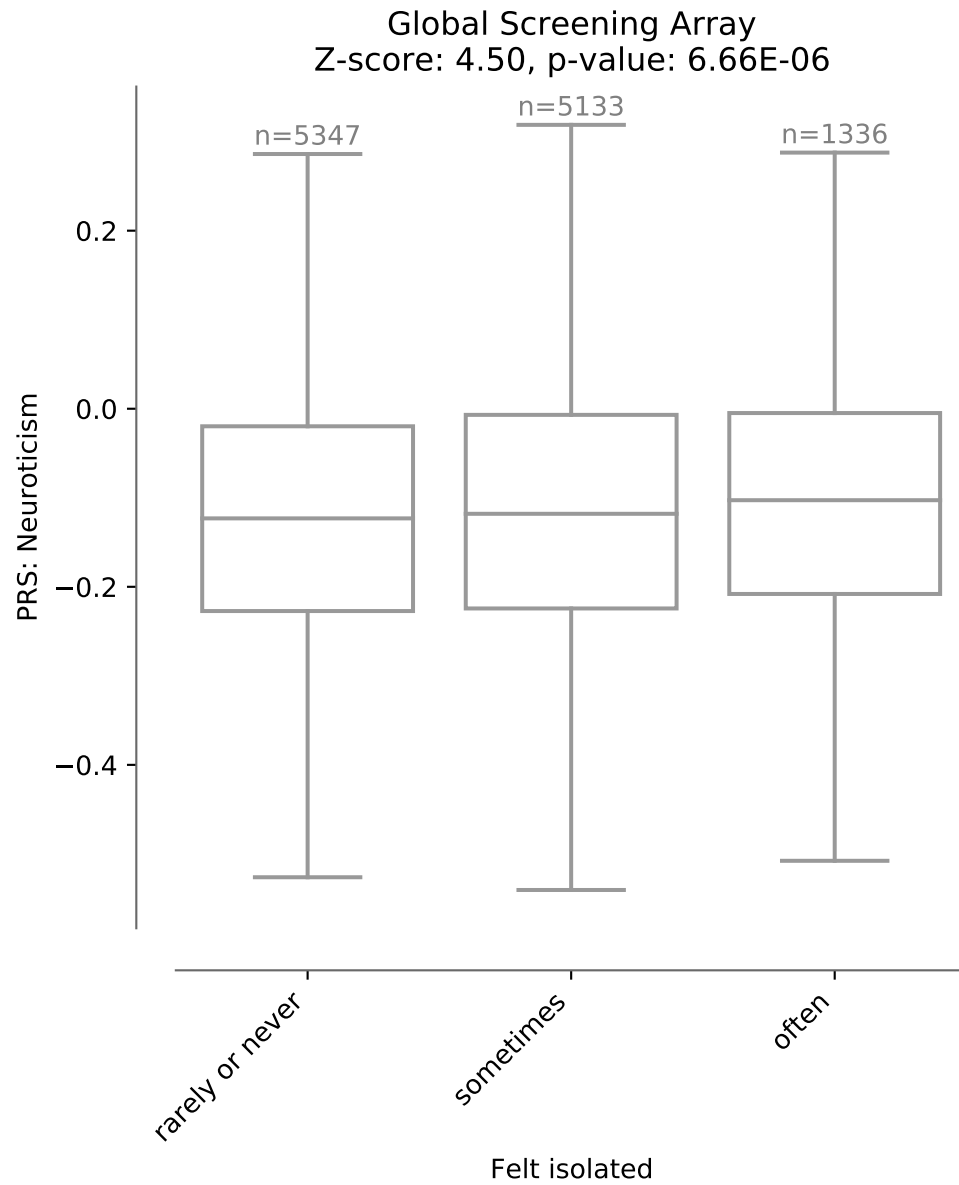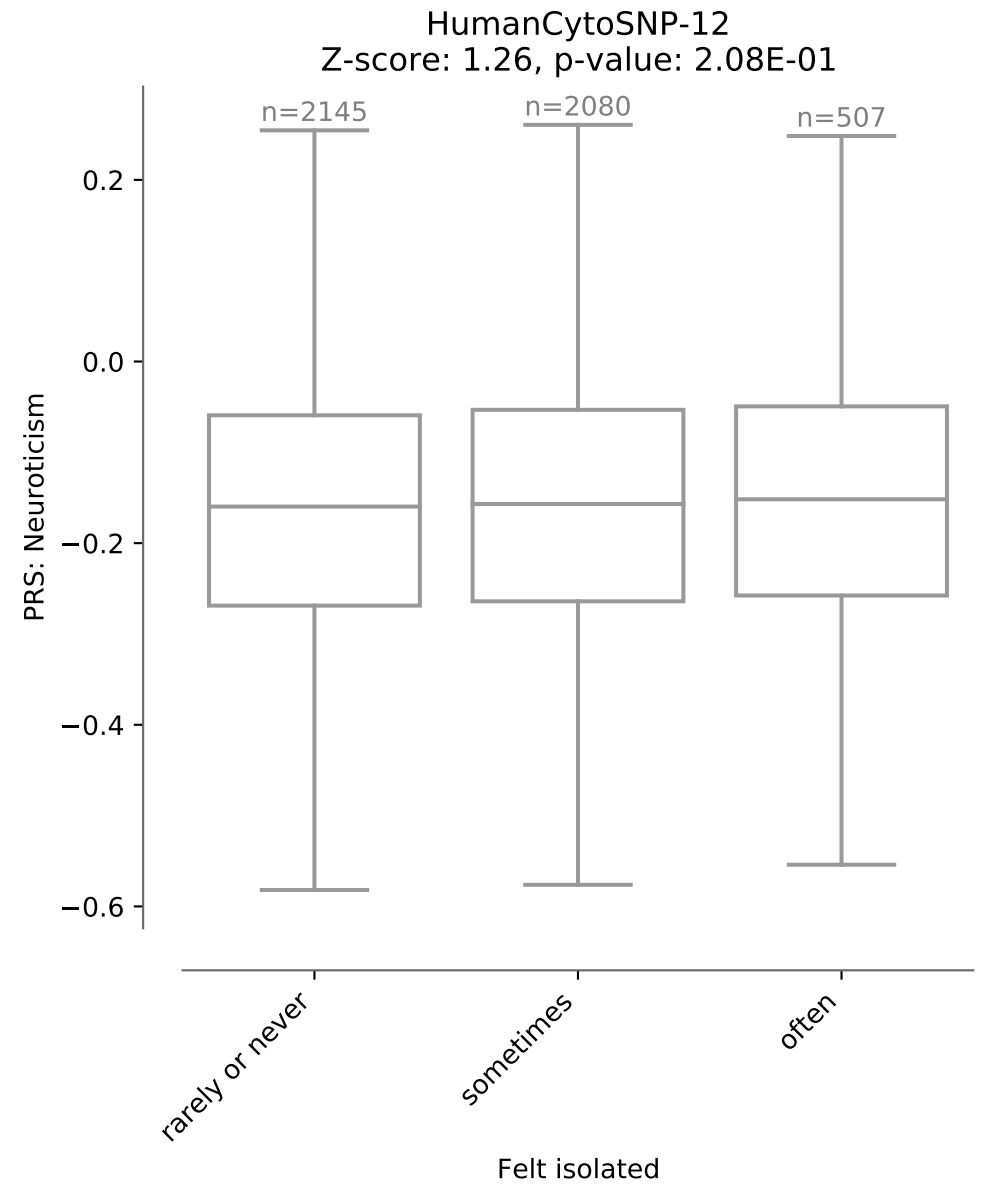

Felt alone  
PGS: Life satisfaction  
Meta analysis Z-score: -5.98, p-value: 2.26E-09

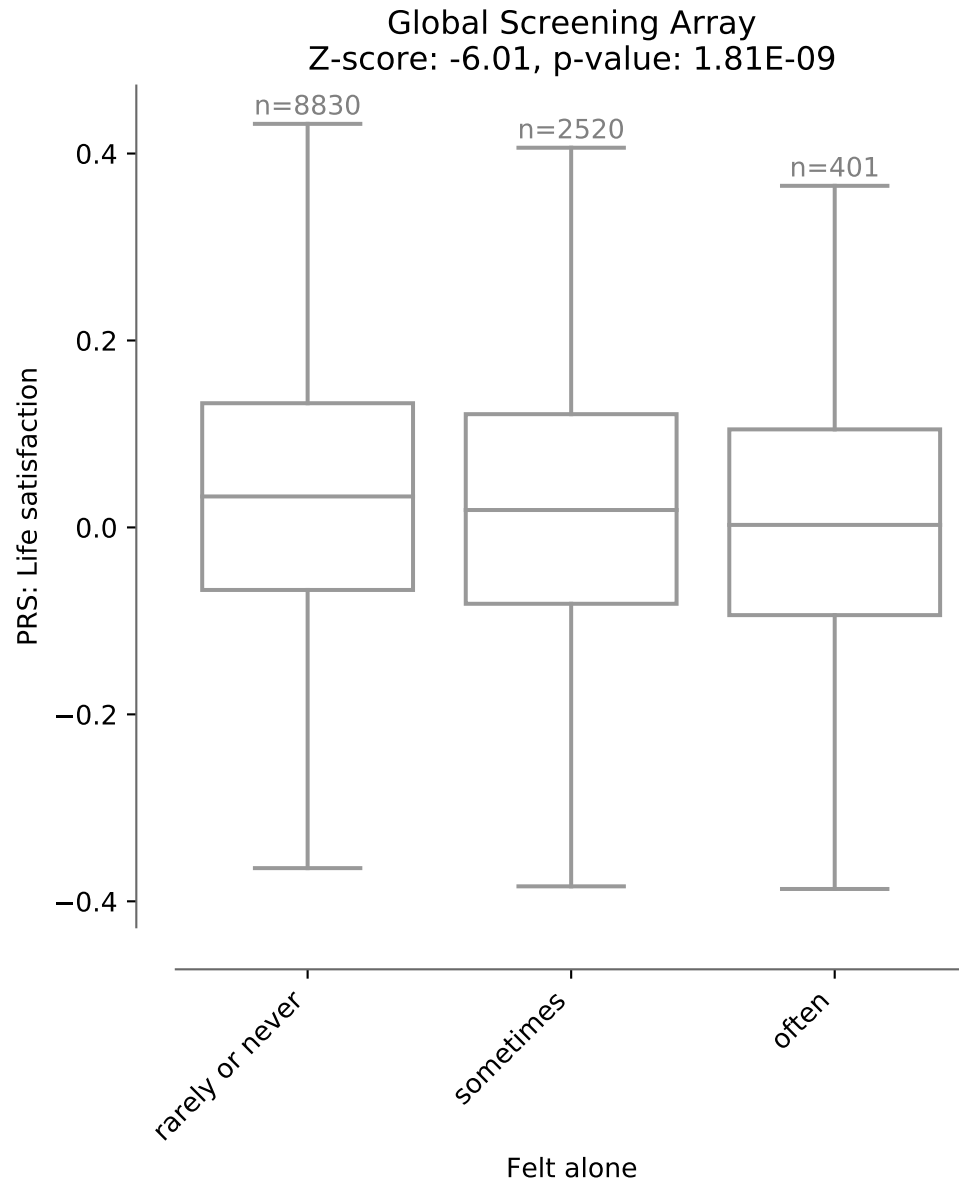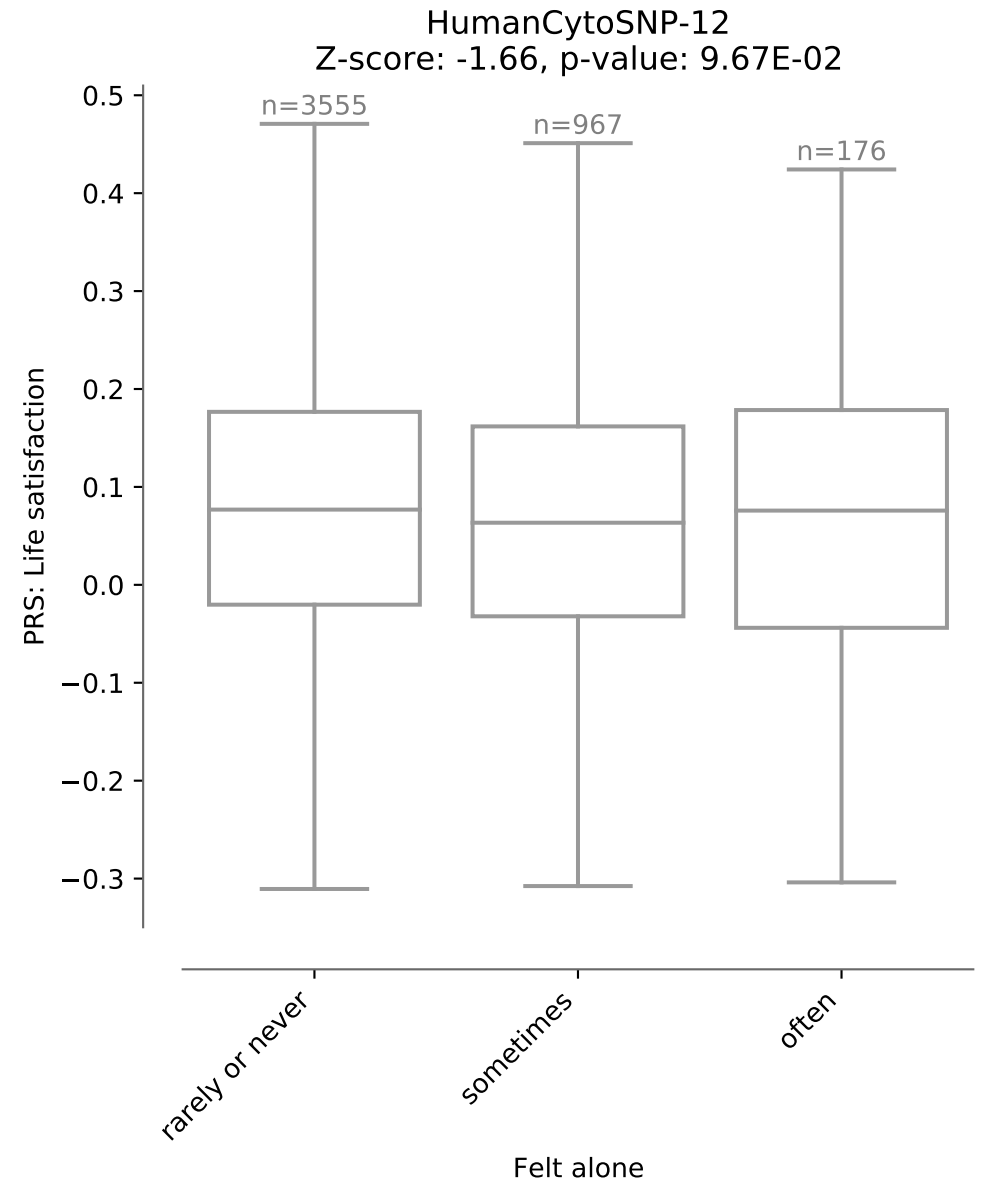

Felt alone  
PGS: Neuroticism  
Meta analysis Z-score: 5.75, p-value: 8.75E-09

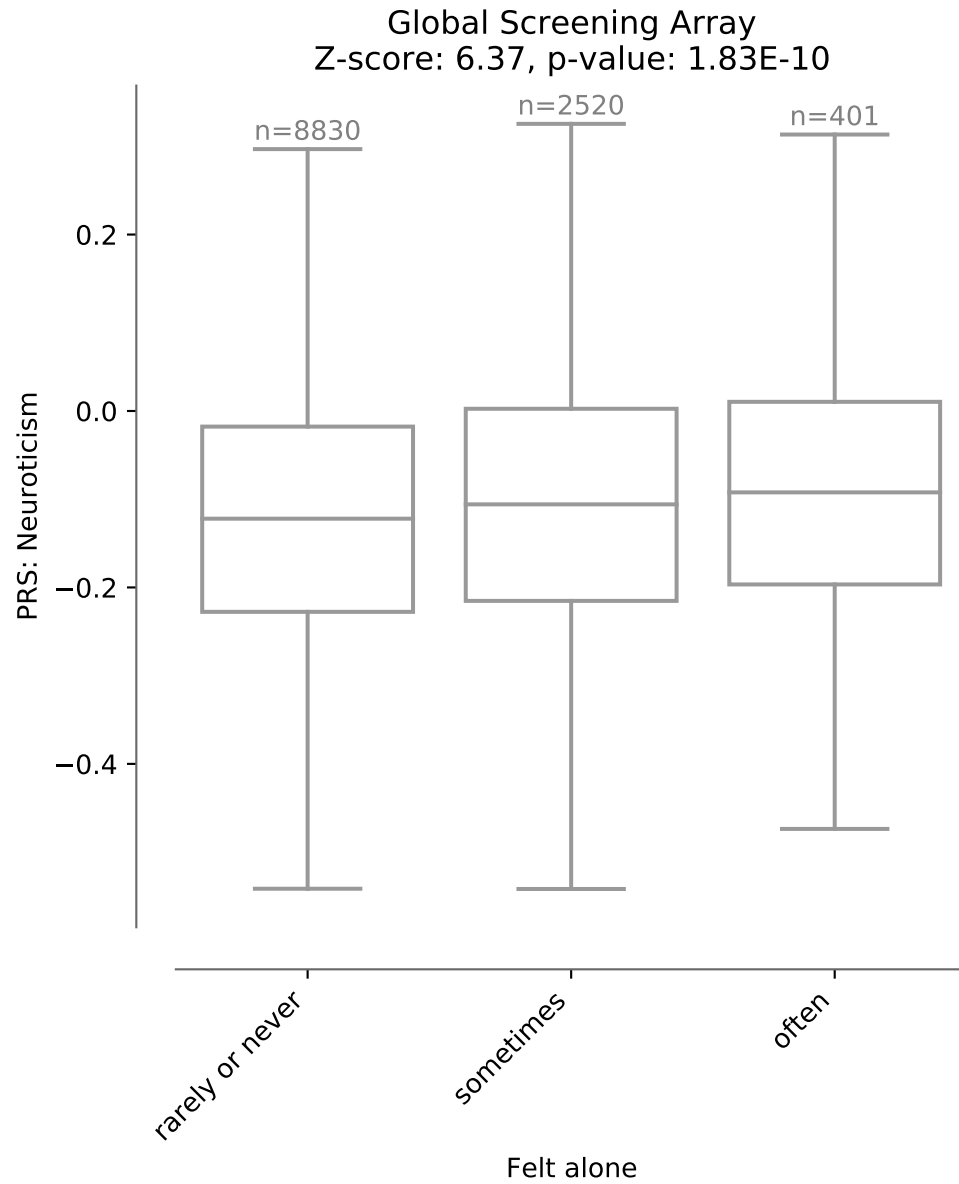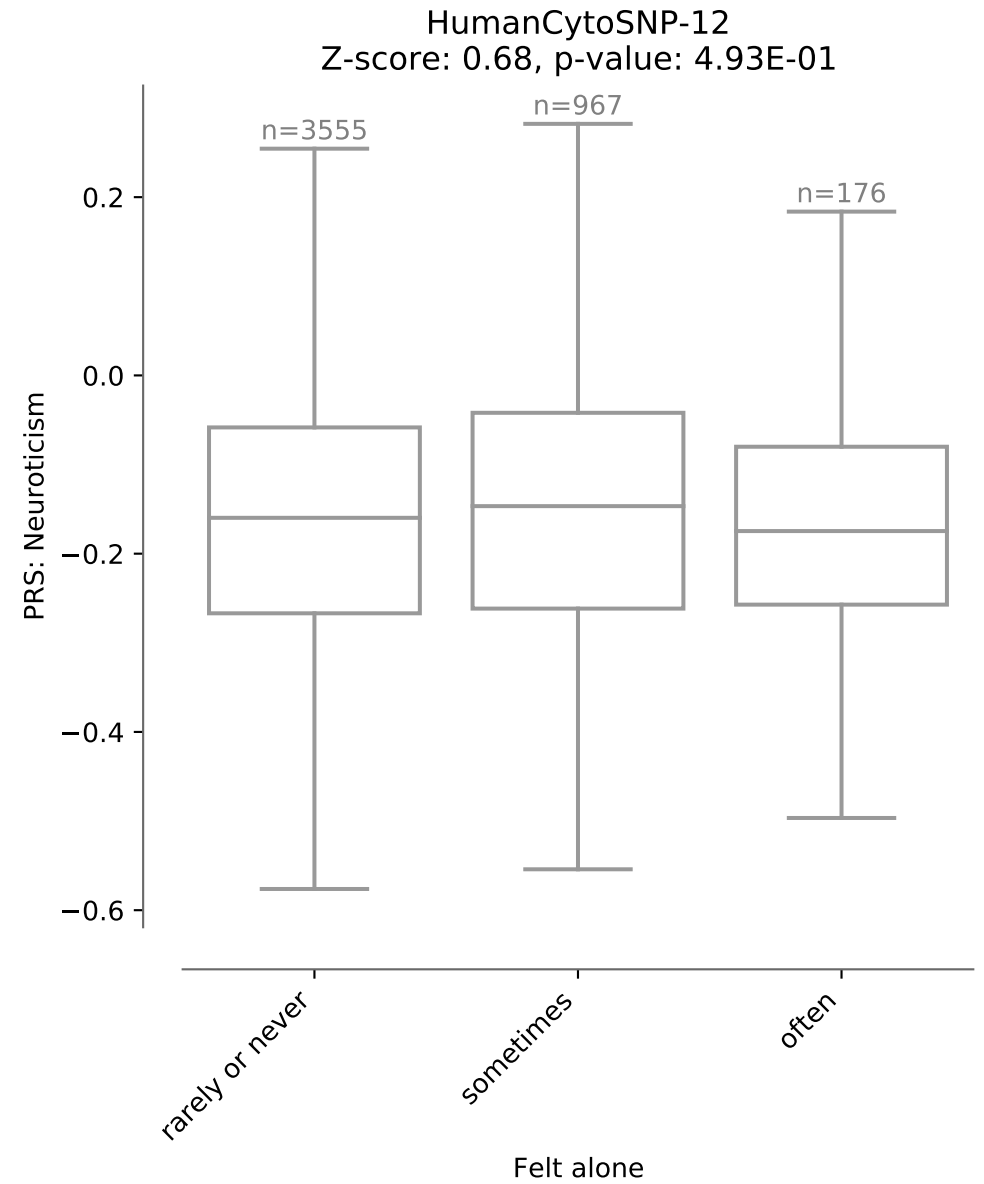



Often felt excluded by society  
PGS: Life satisfaction  
Meta analysis Z-score: -5.19, p-value: 2.15E-07

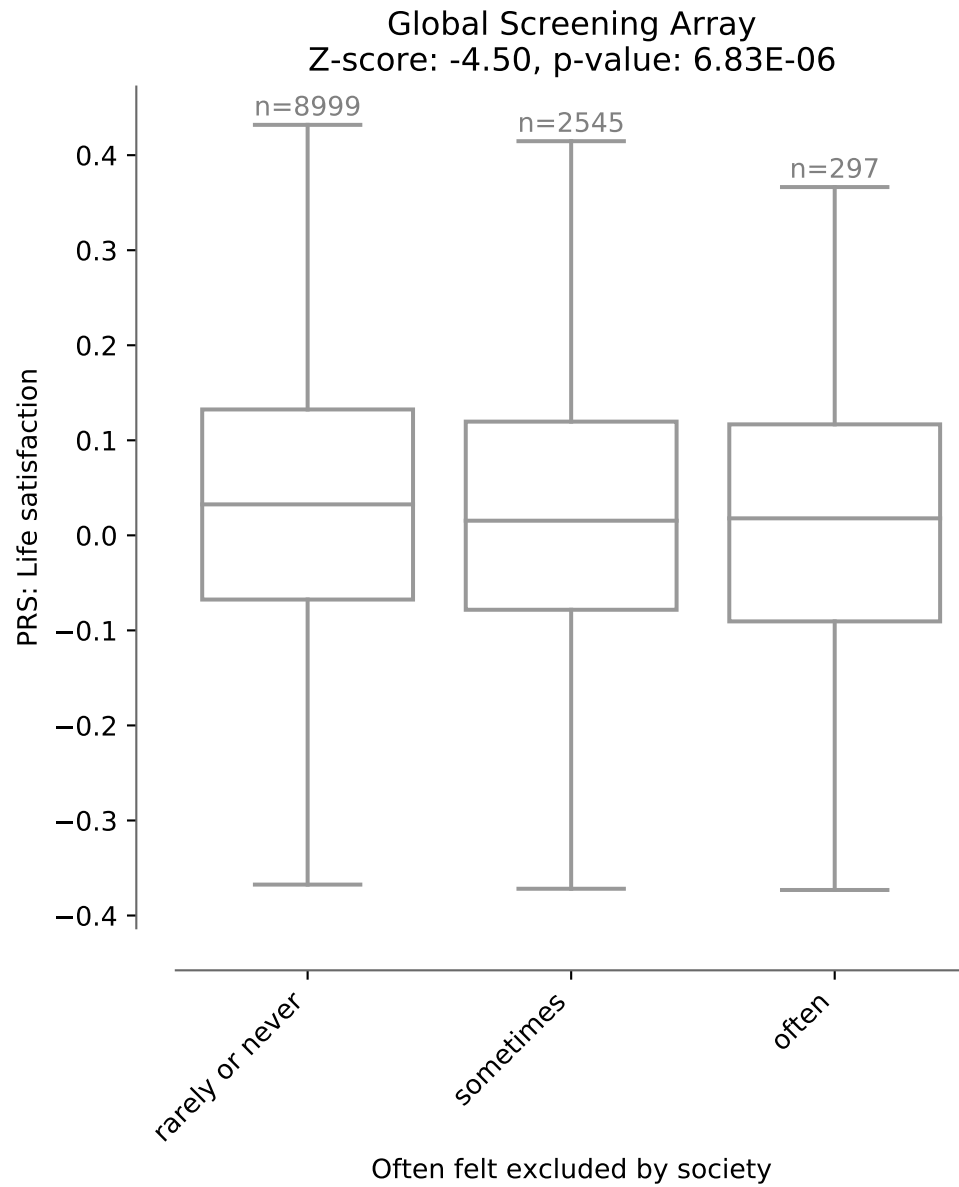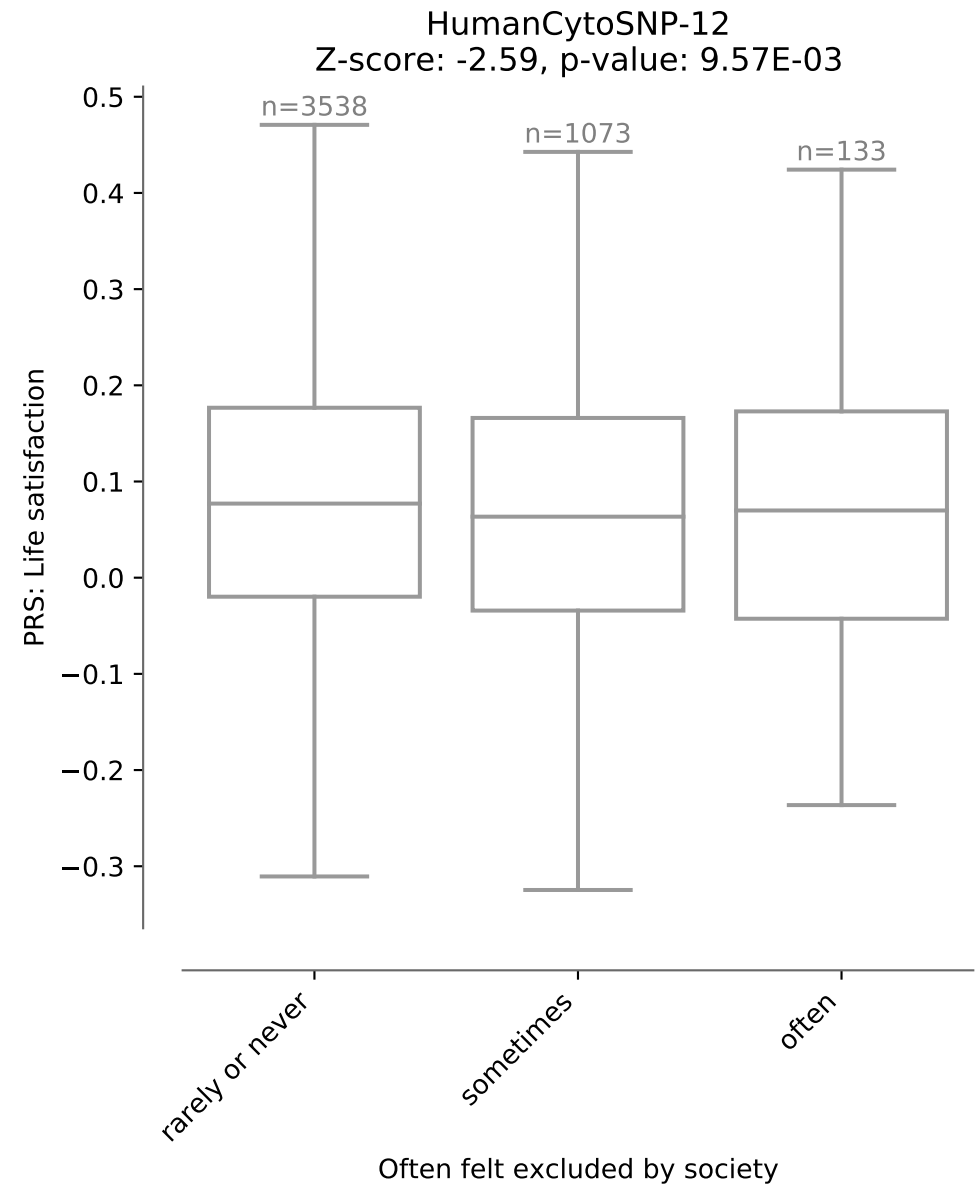

Often felt excluded by society  
PGS: Neuroticism  
Meta analysis Z-score: 4.98, p-value: 6.52E-07

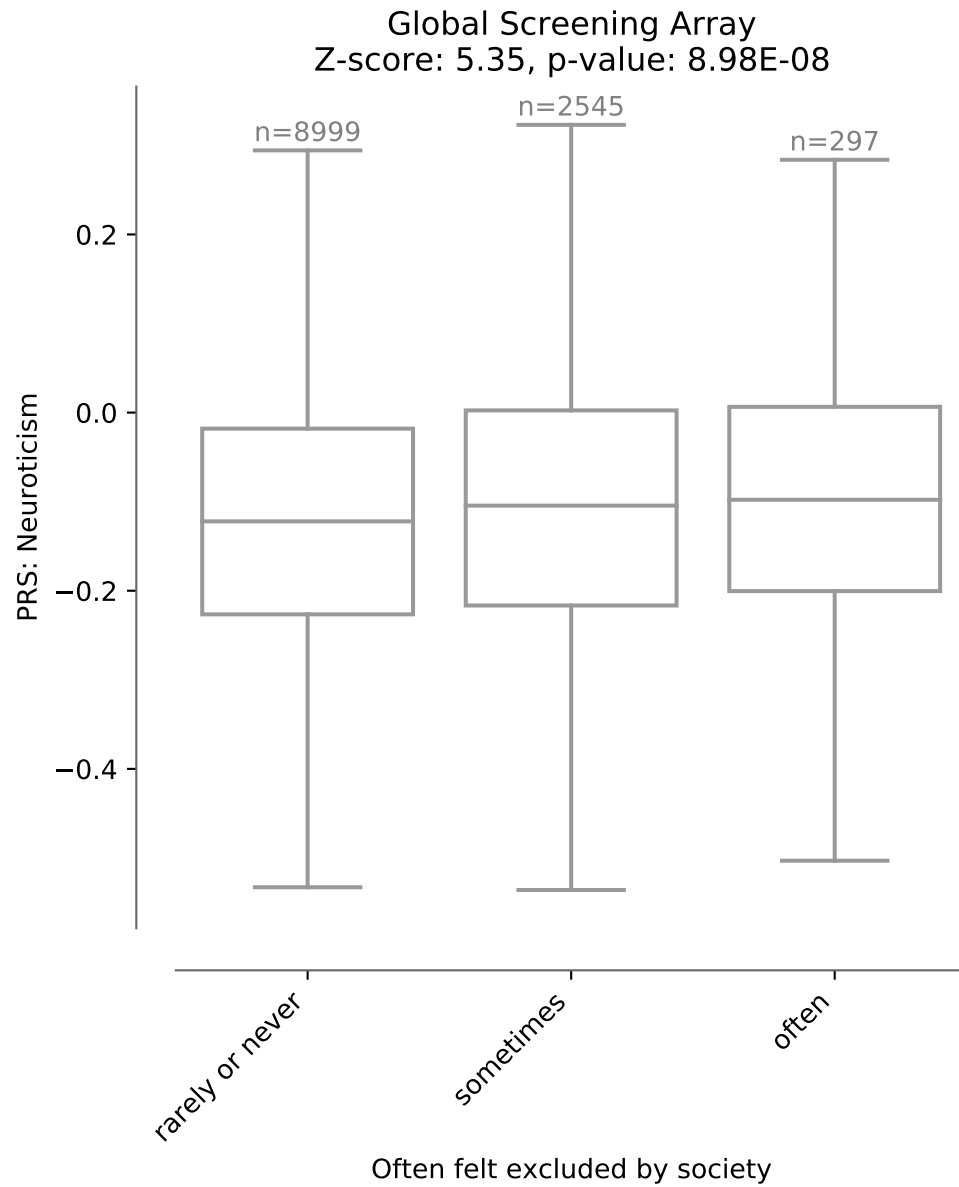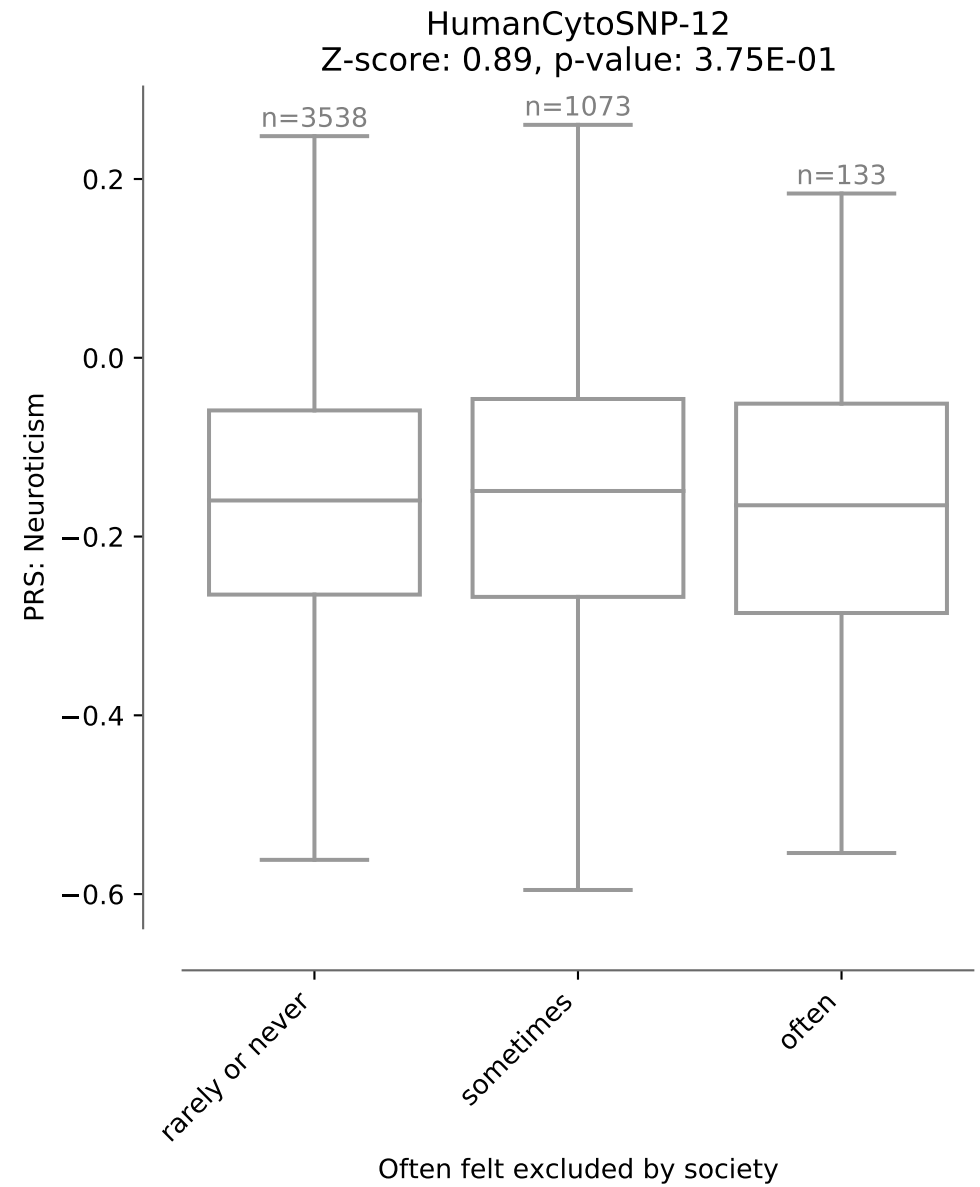

Washed hands for over 20 seconds more than six times per day

PGS: BMI

Meta analysis Z-score: 5.58, p-value: 2.37E-08

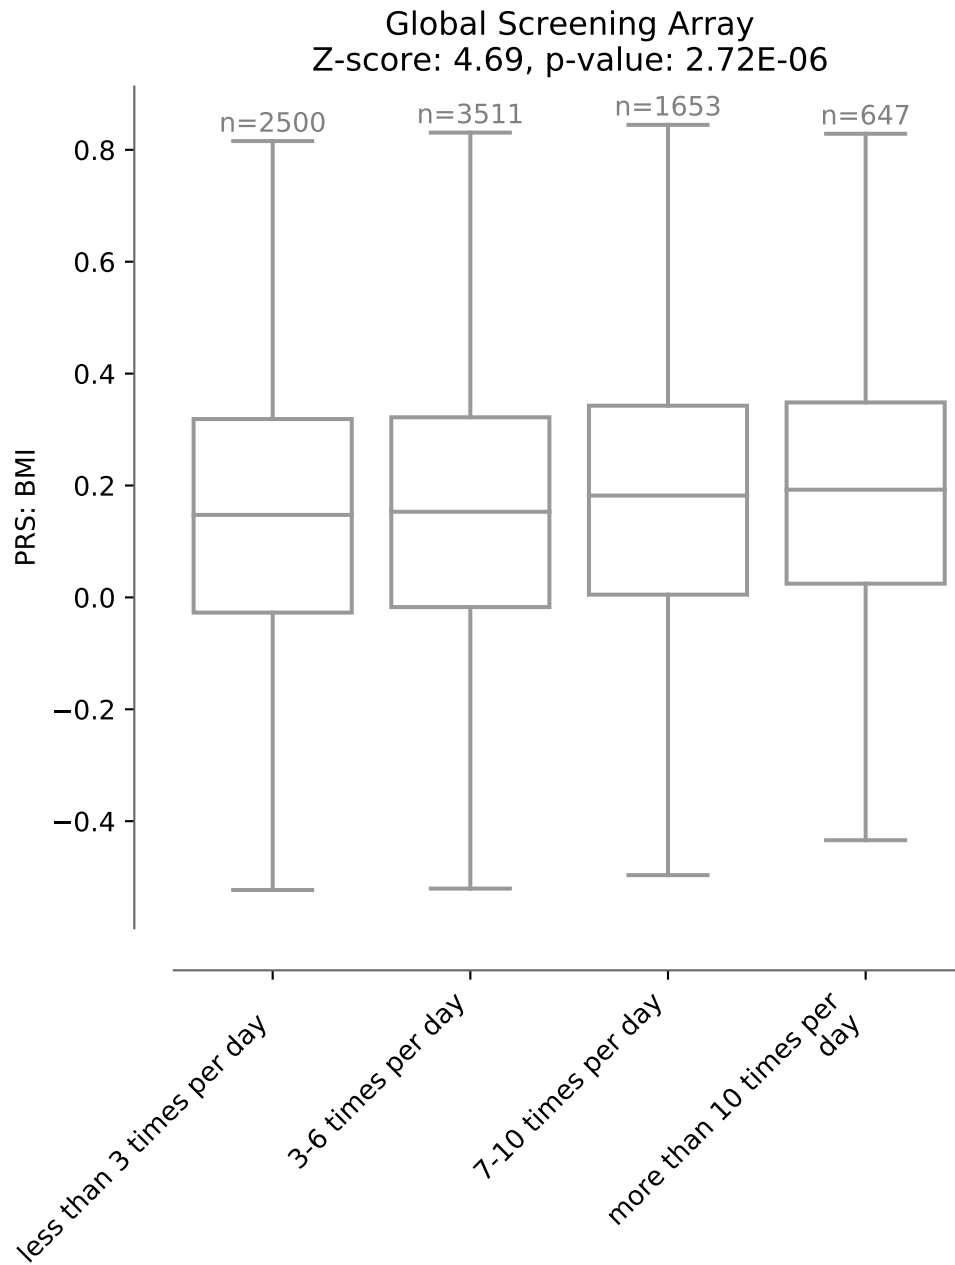

Washed hands for over 20 seconds more than six times per day

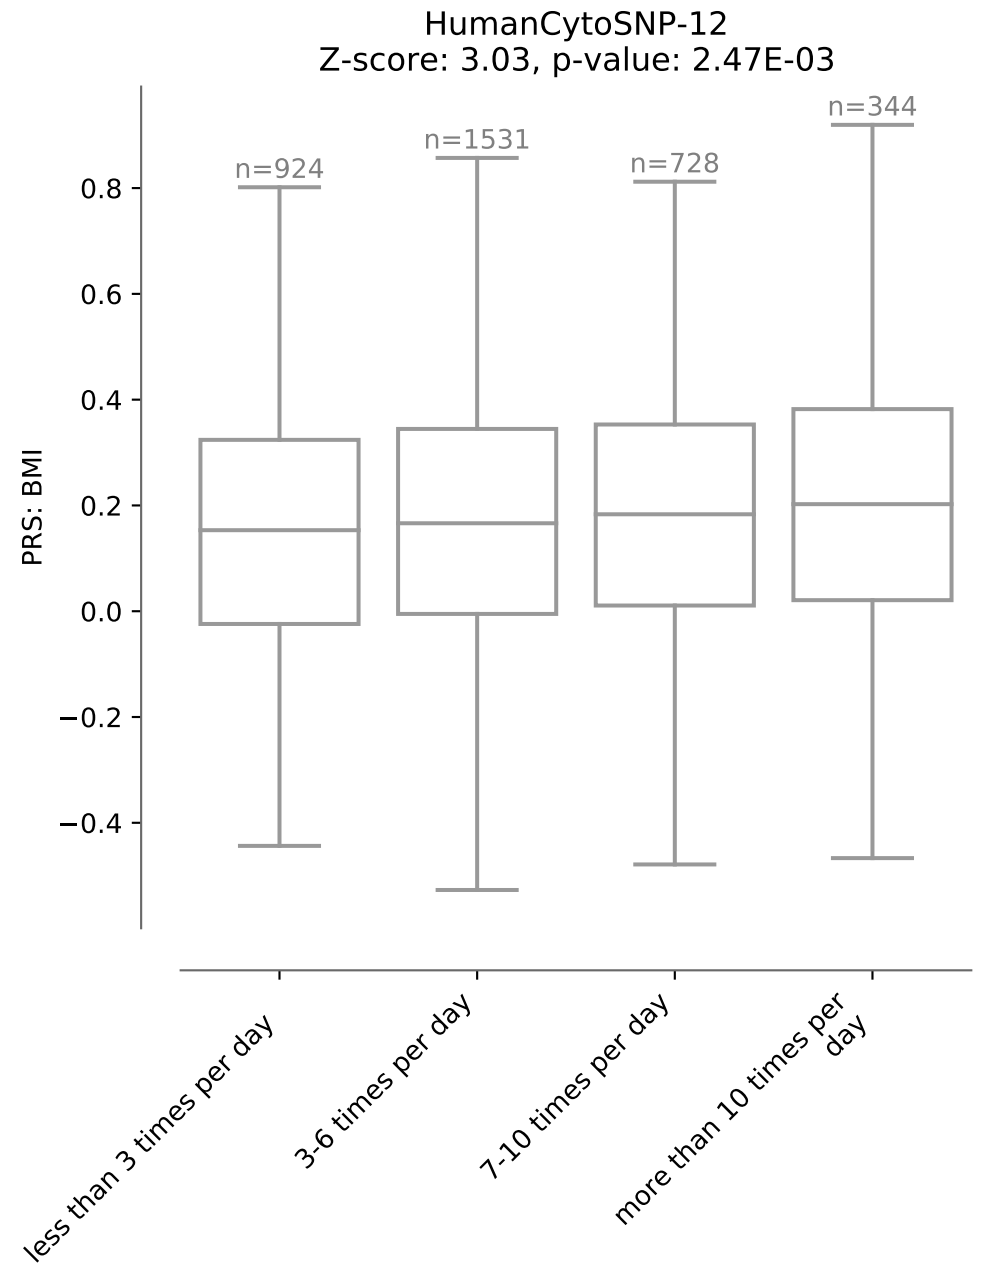

Washed hands for over 20 seconds more than six times per day

Washed hands for over 20 seconds more than six times per day  
PGS: Educational attainment  
Meta analysis Z-score: -10.17, p-value: 2.83E-24

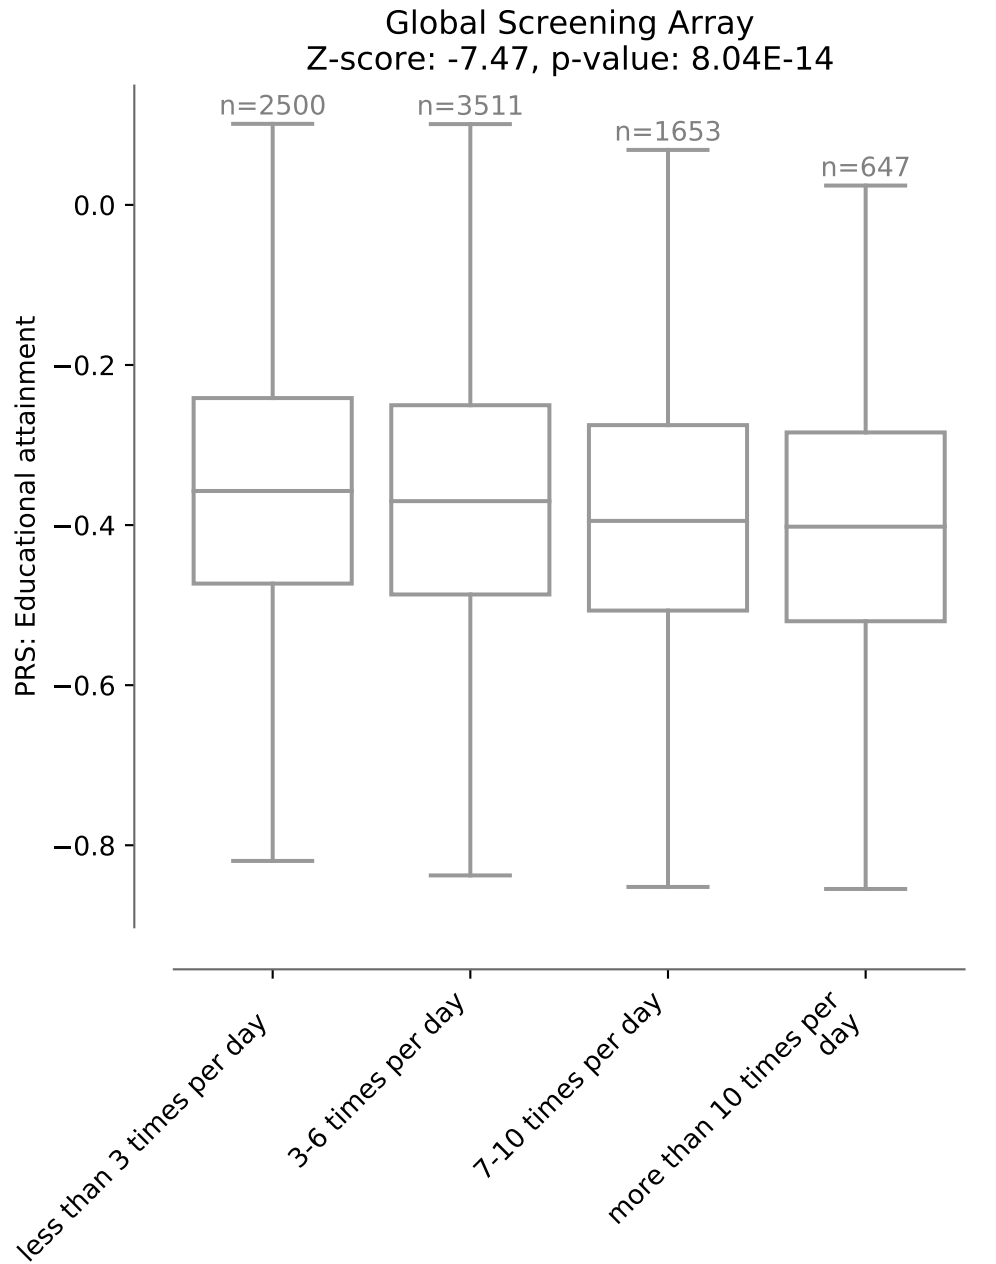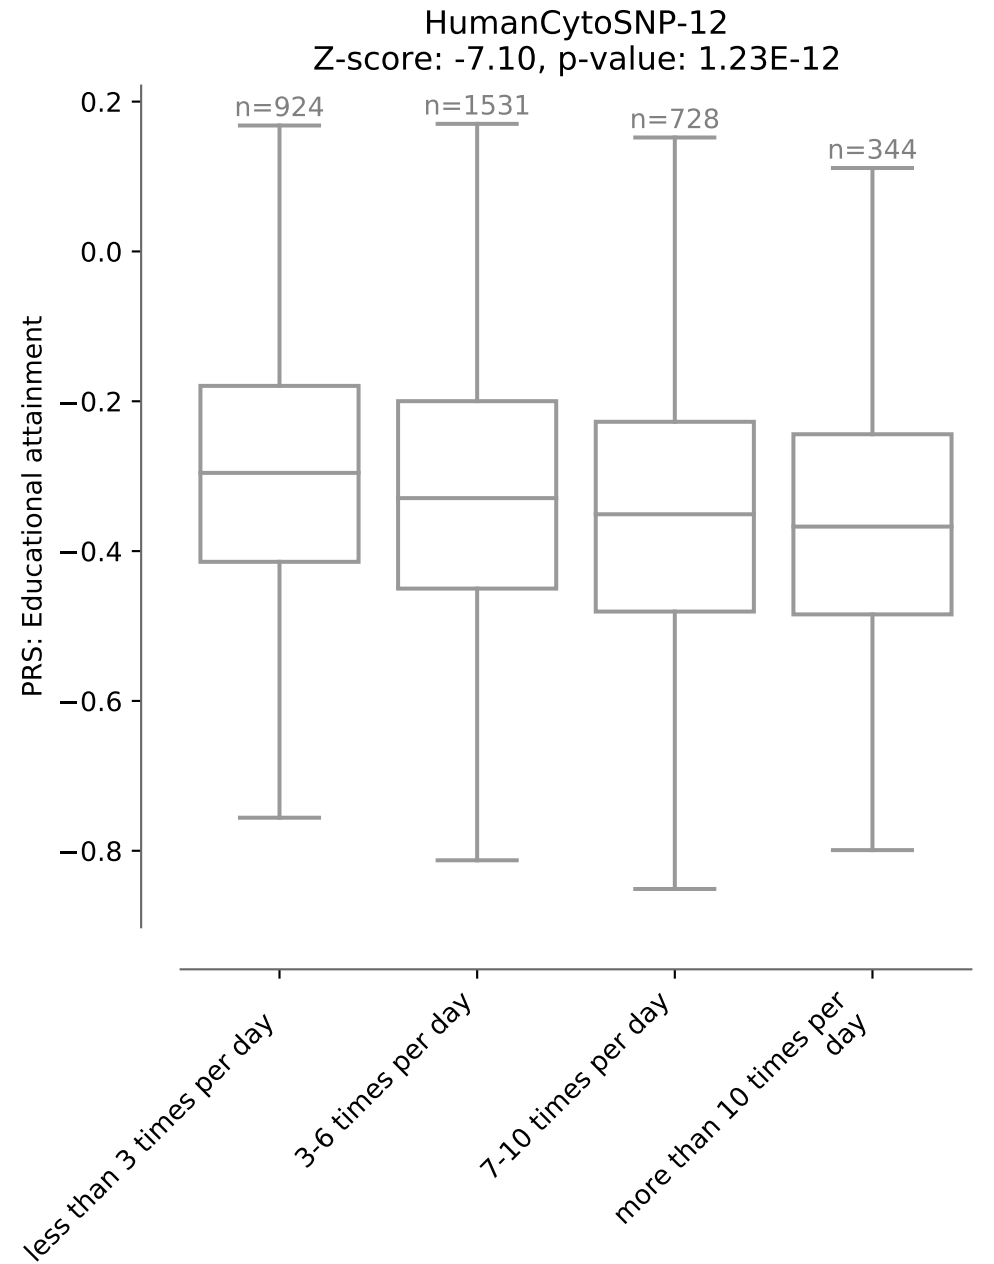

Washed hands for over 20 seconds more than six times per day

Washed hands for over 20 seconds more than six times per day

Expected feel about christmas  
PGS: Life satisfaction  
Meta analysis Z-score: 4.54, p-value: 5.64E-06

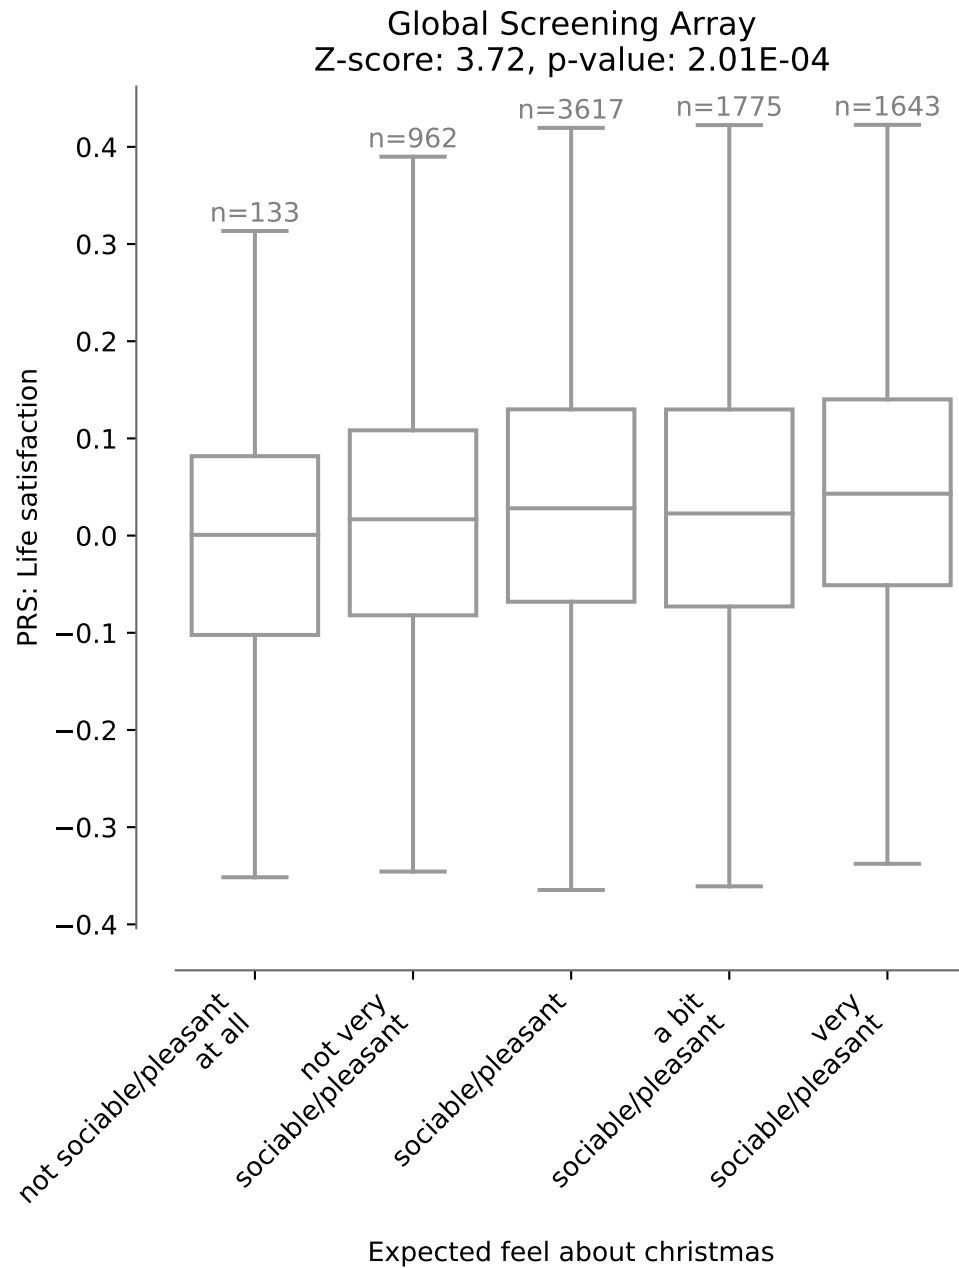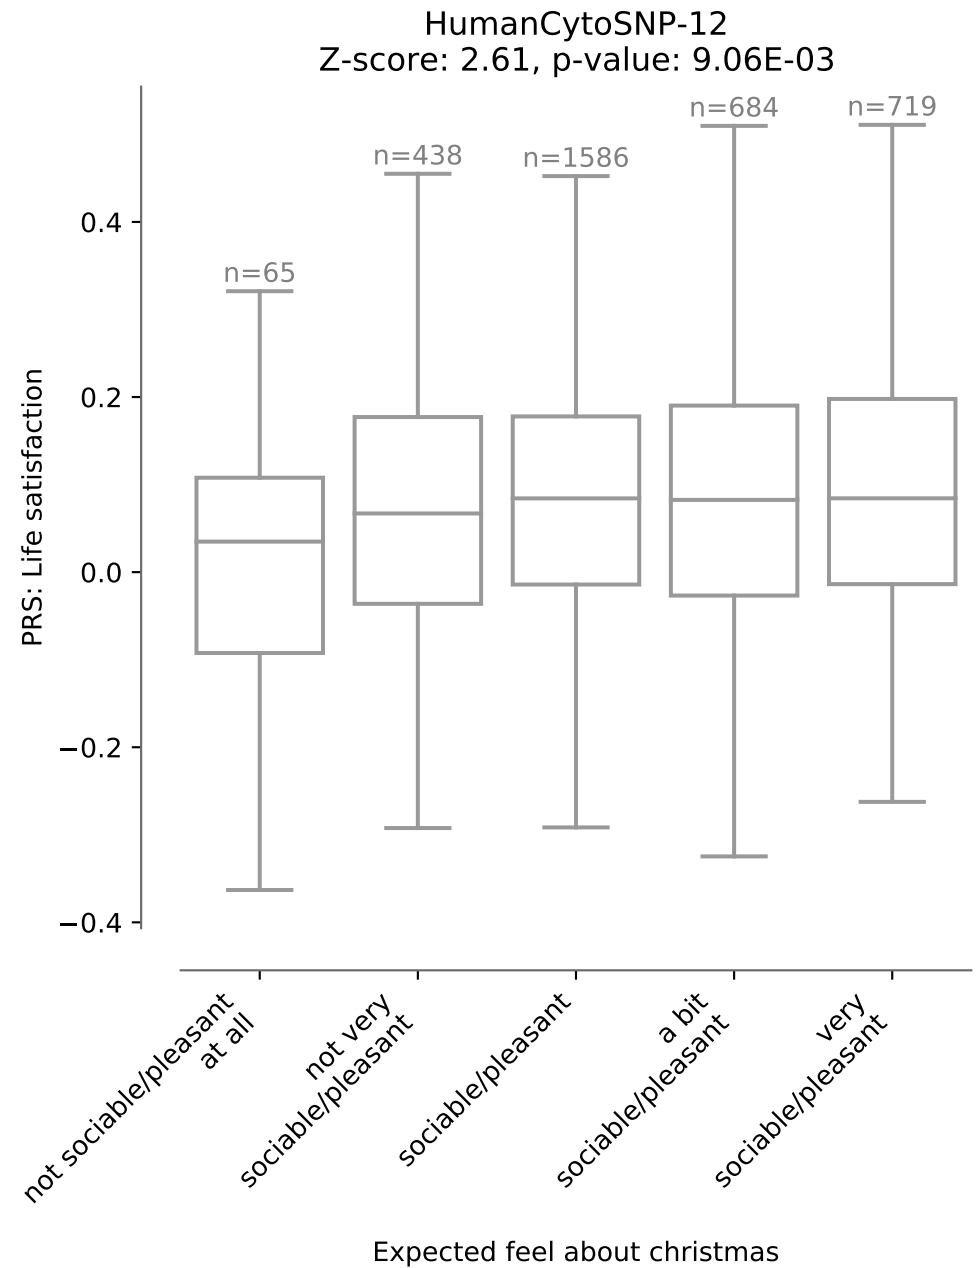

Quality of life  
PGS: Life satisfaction  
Meta analysis Z-score: 7.47, p-value: 8.13E-14

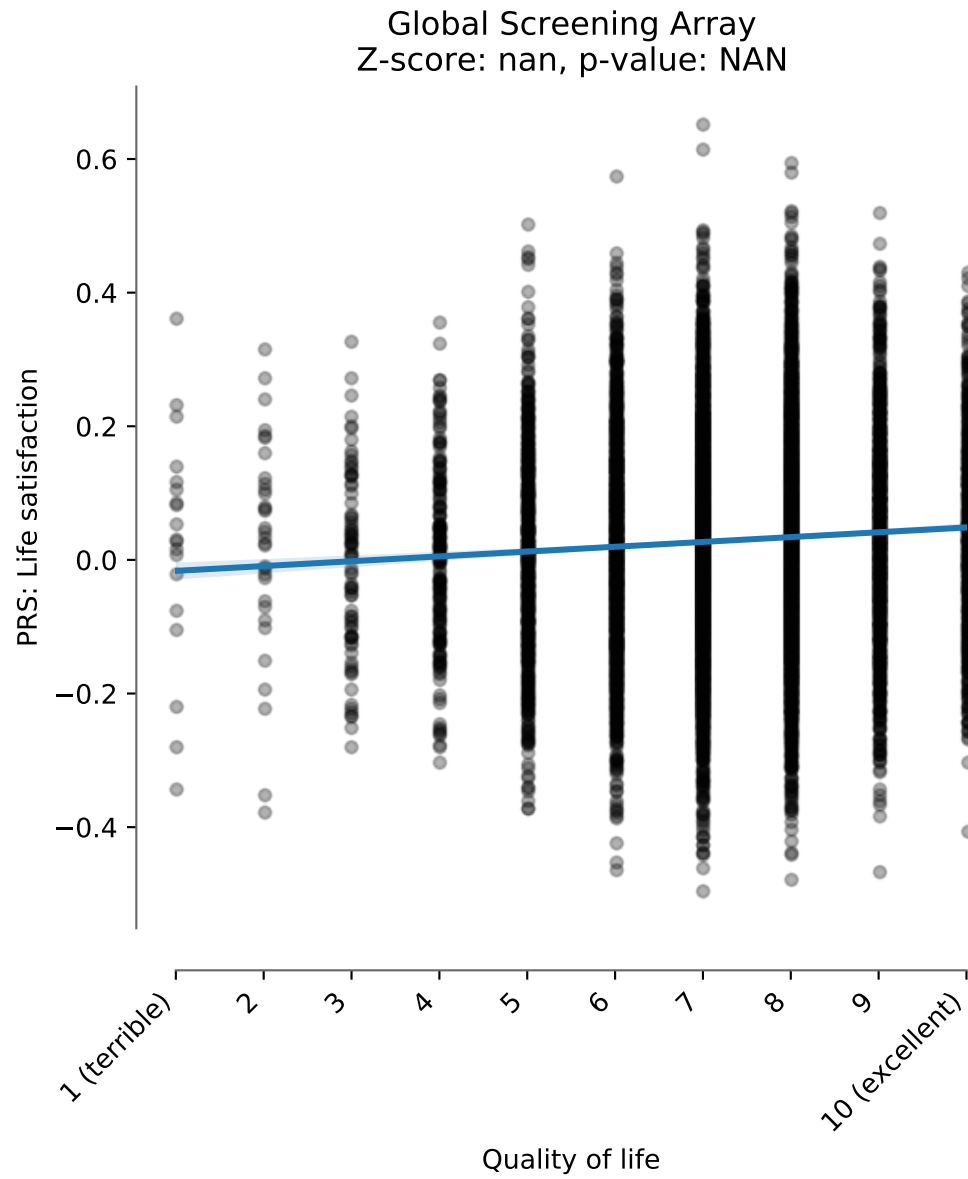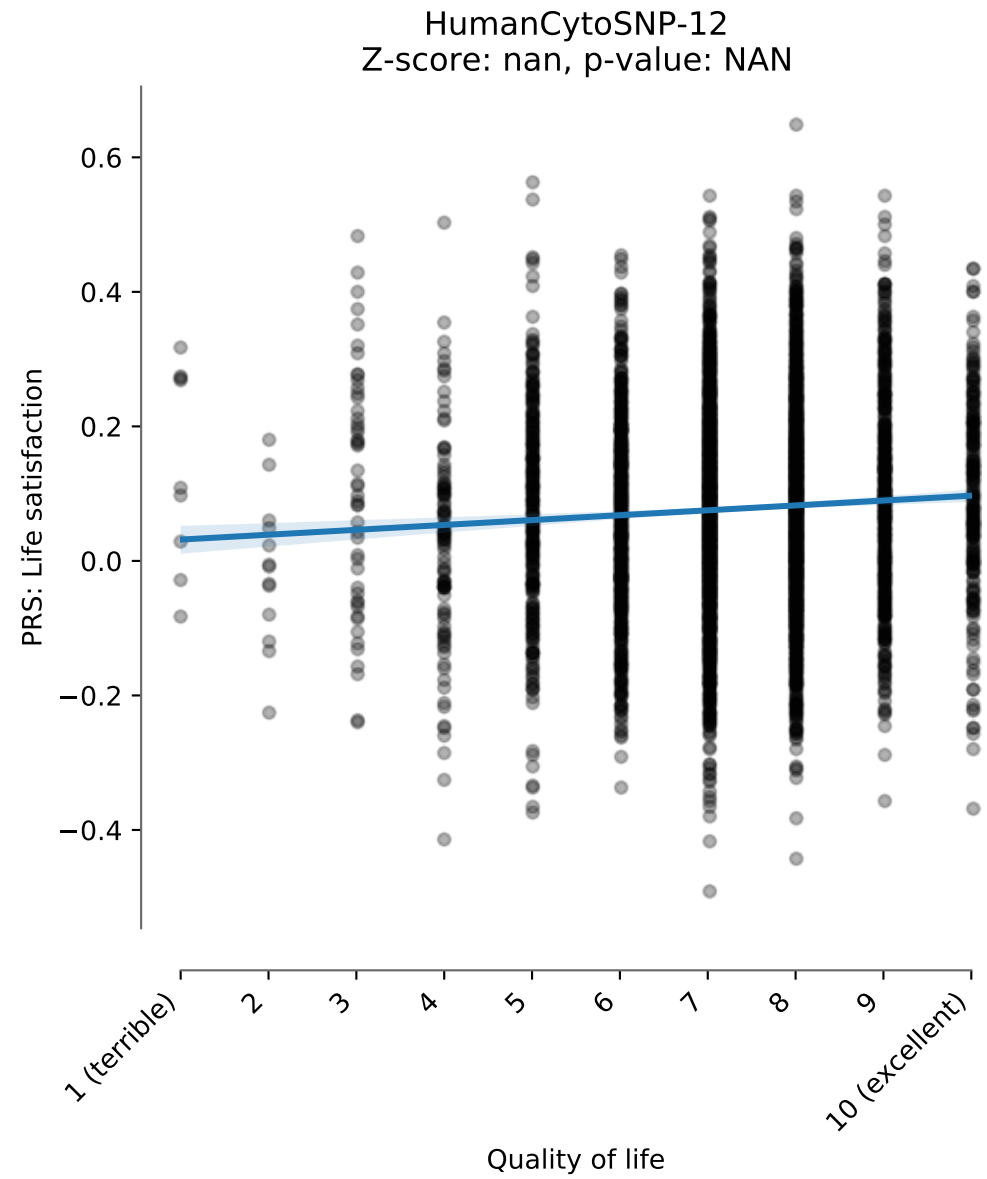

Quality of life  
PGS: Neuroticism  
Meta analysis Z-score: -7.07, p-value: 1.52E-12

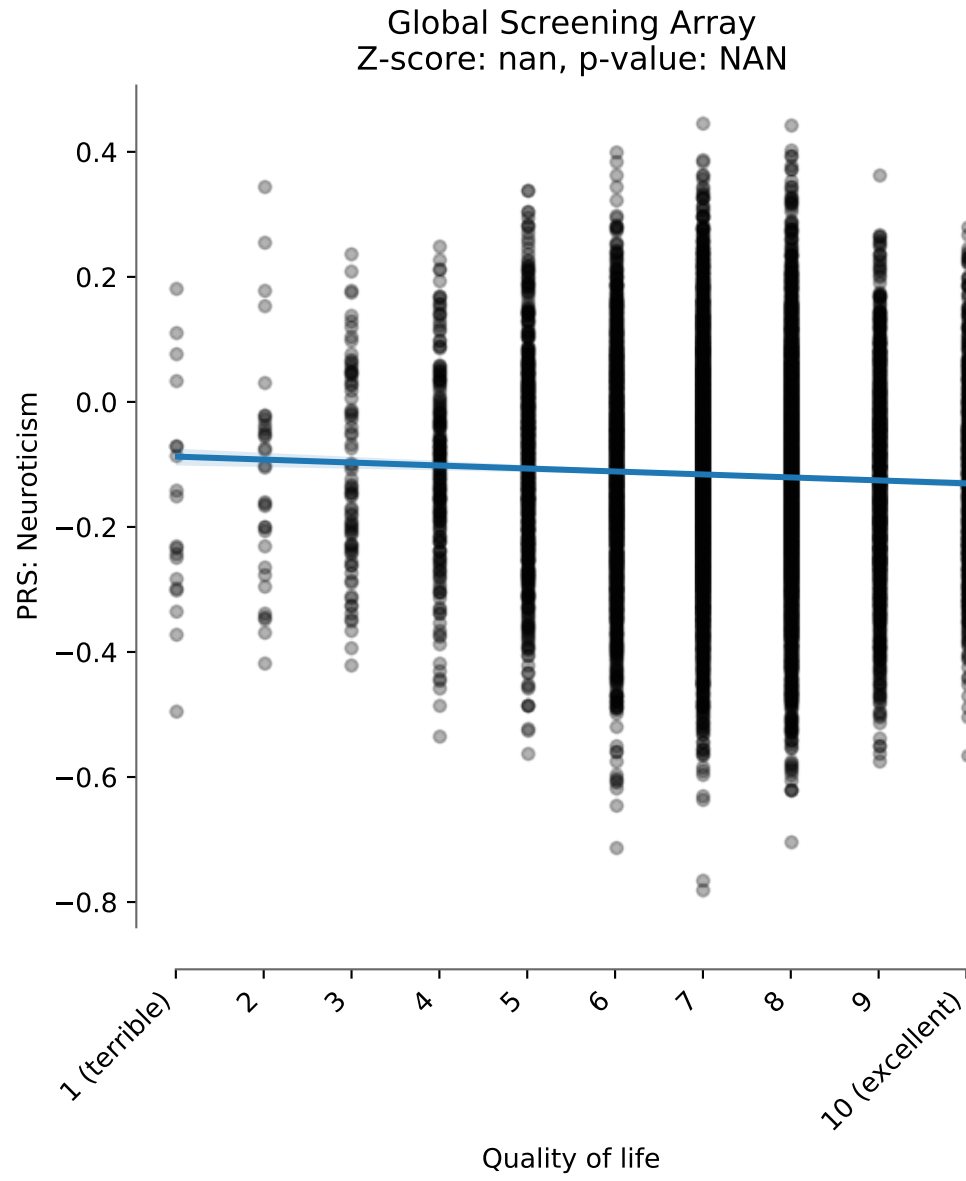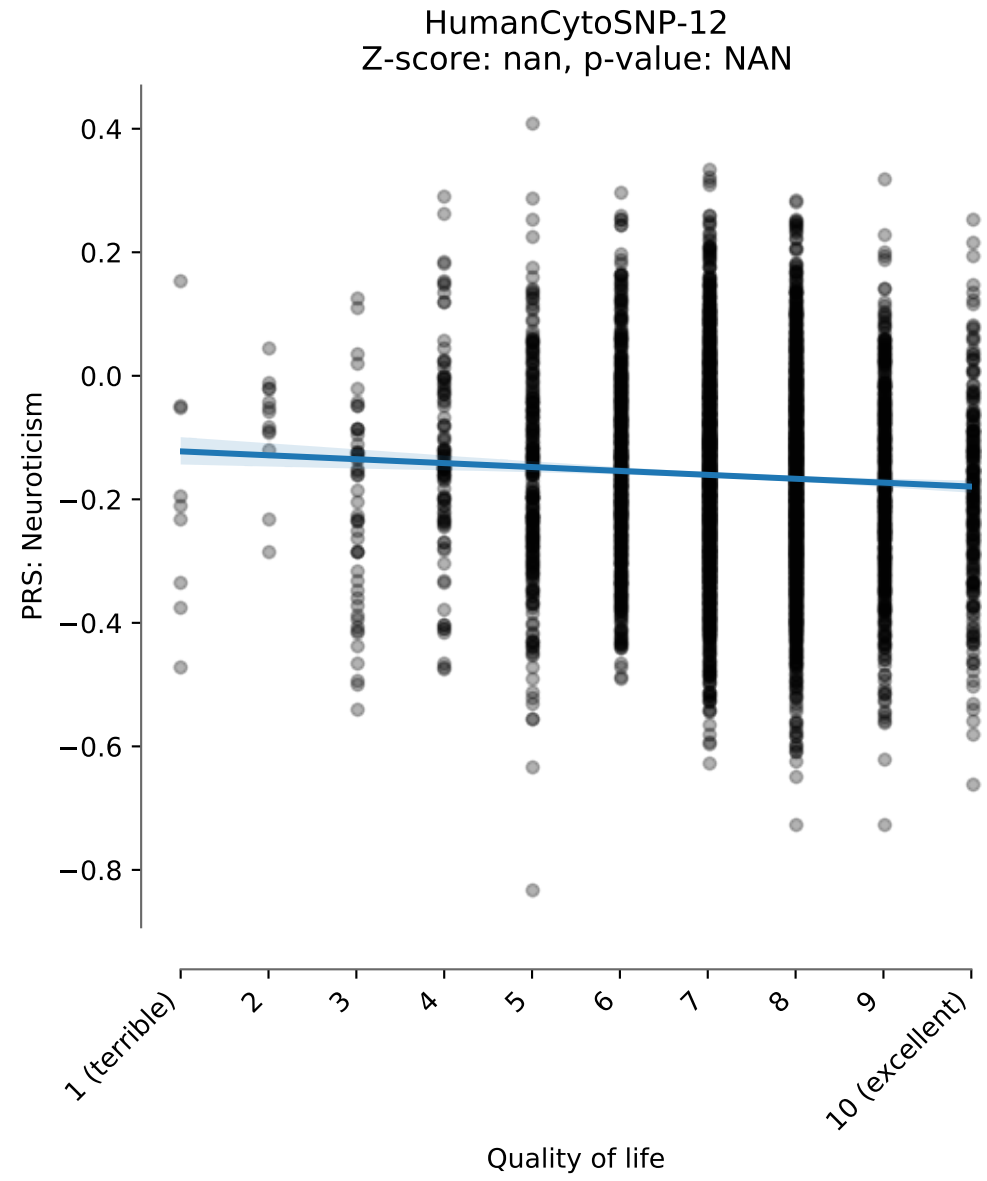

Had dry cough  
PGS: Neuroticism  
Meta analysis Z-score: 4.60, p-value: 4.33E-06

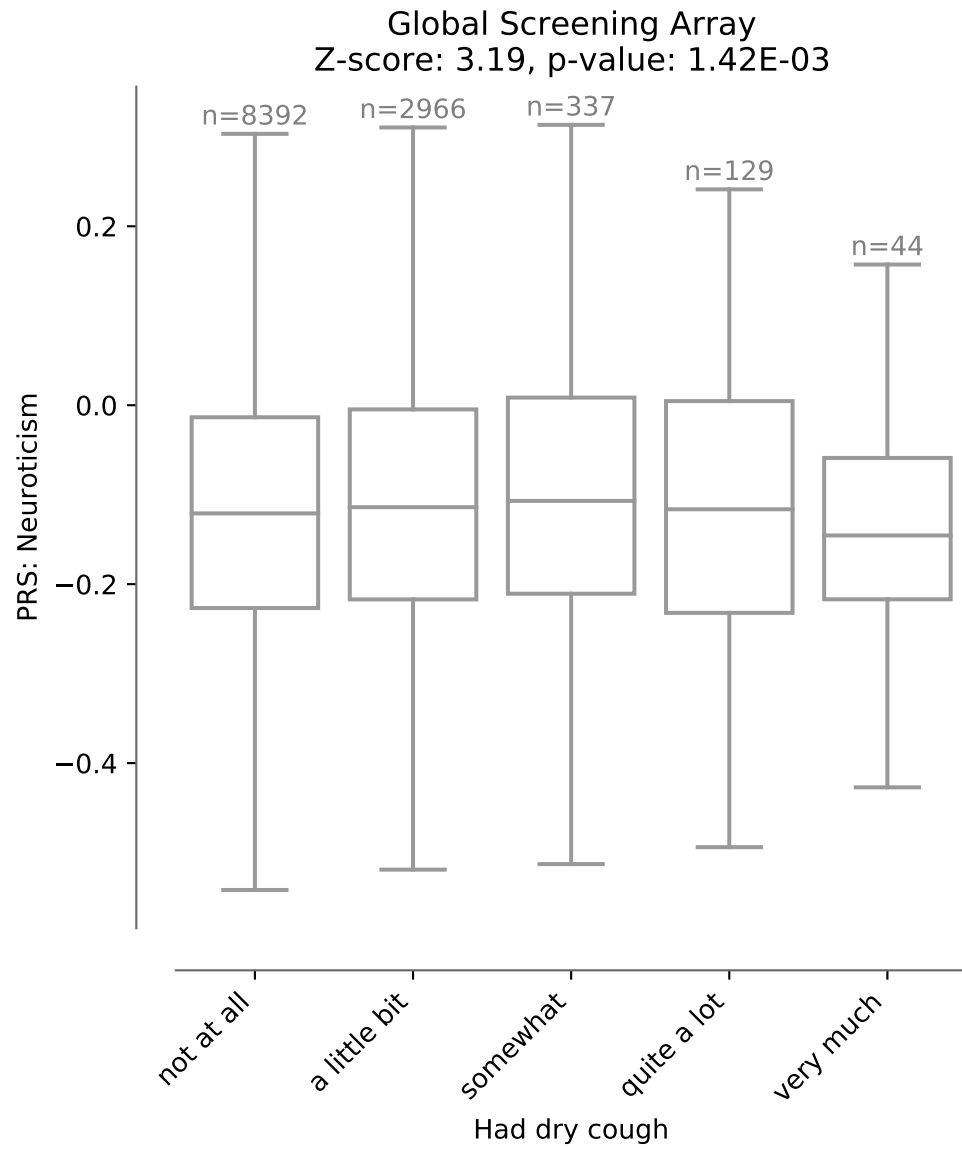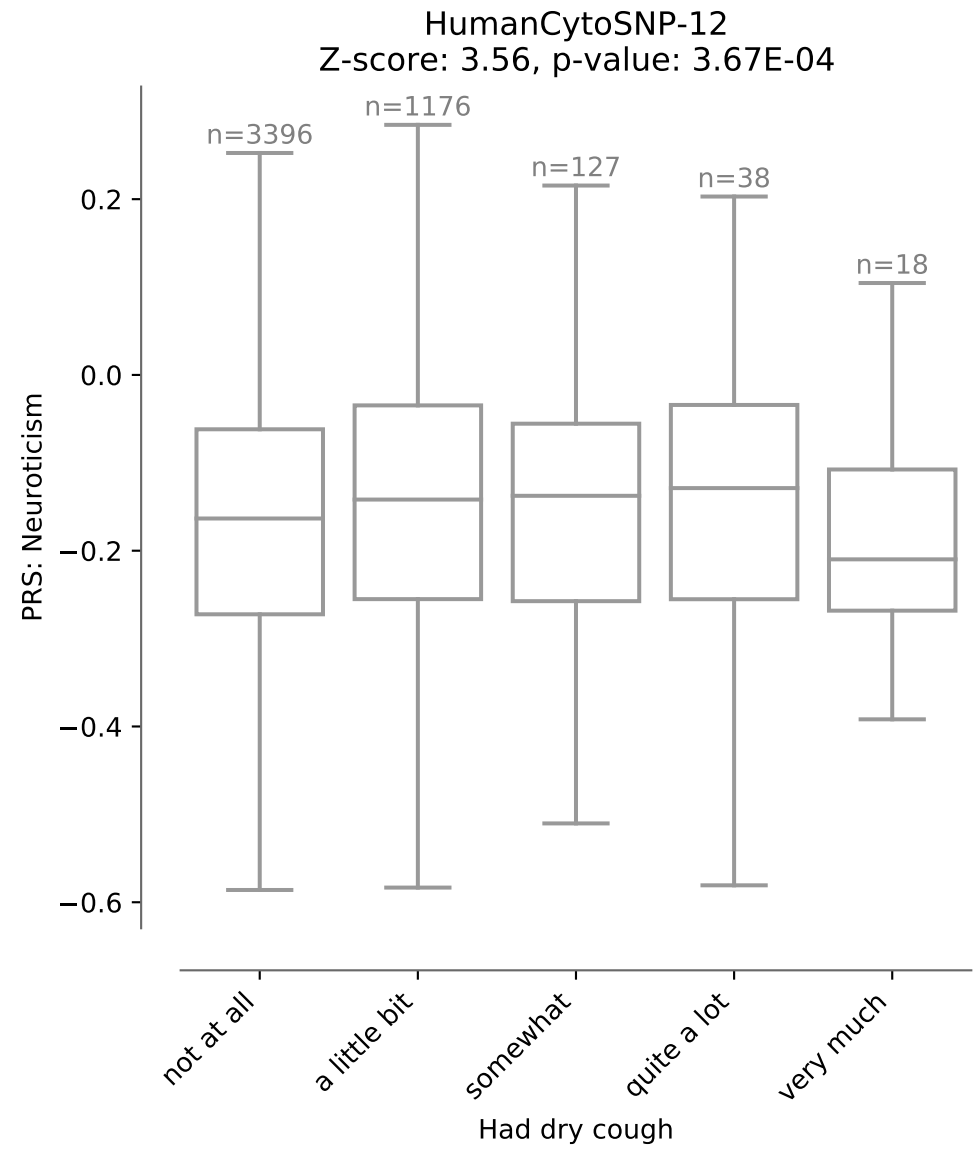



Number of visited or received guests older than 12 years and outside the own household during the christmas break

PGS: Educational attainment

Meta analysis Z-score: 9.83, p-value: 8.36E-23

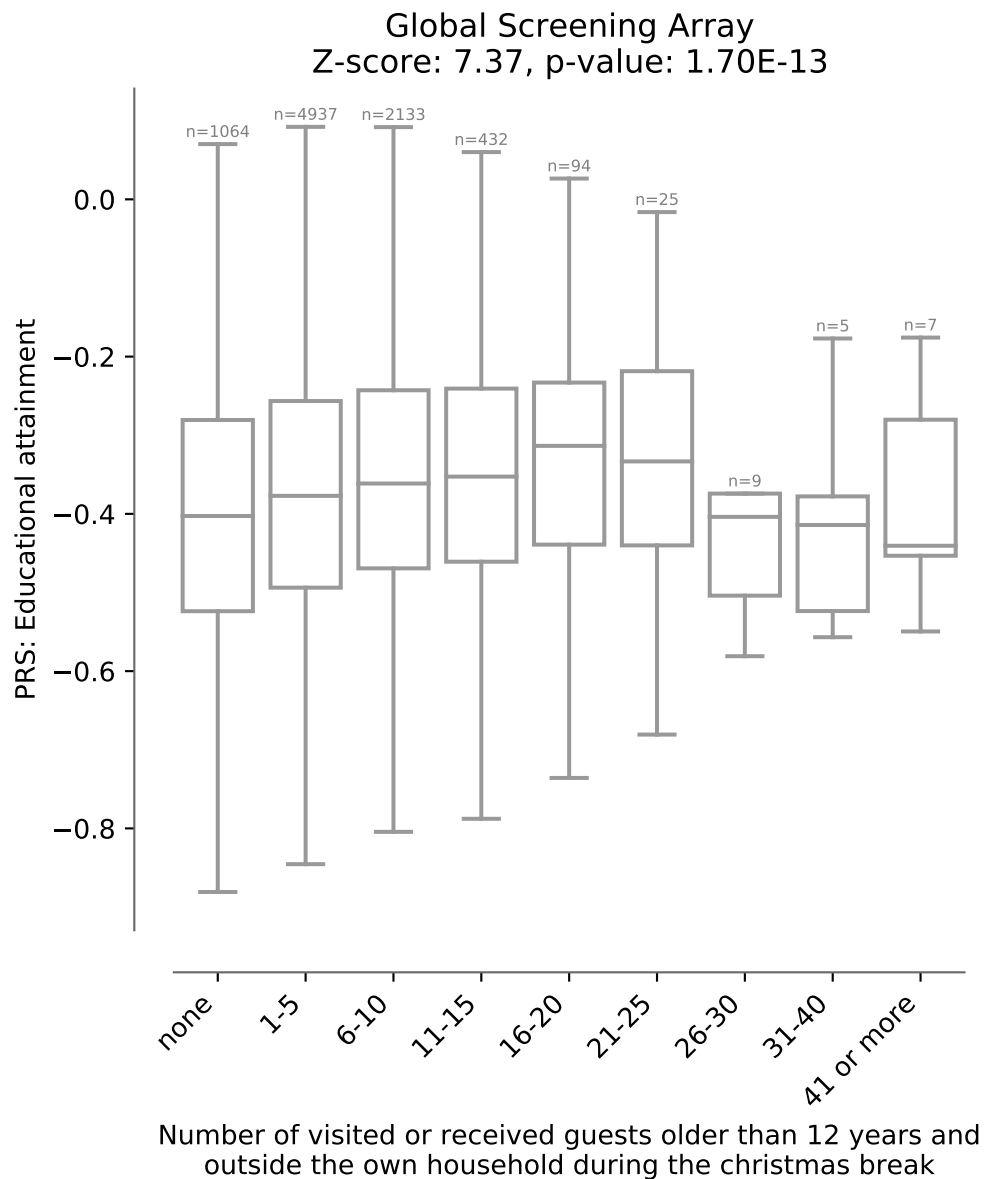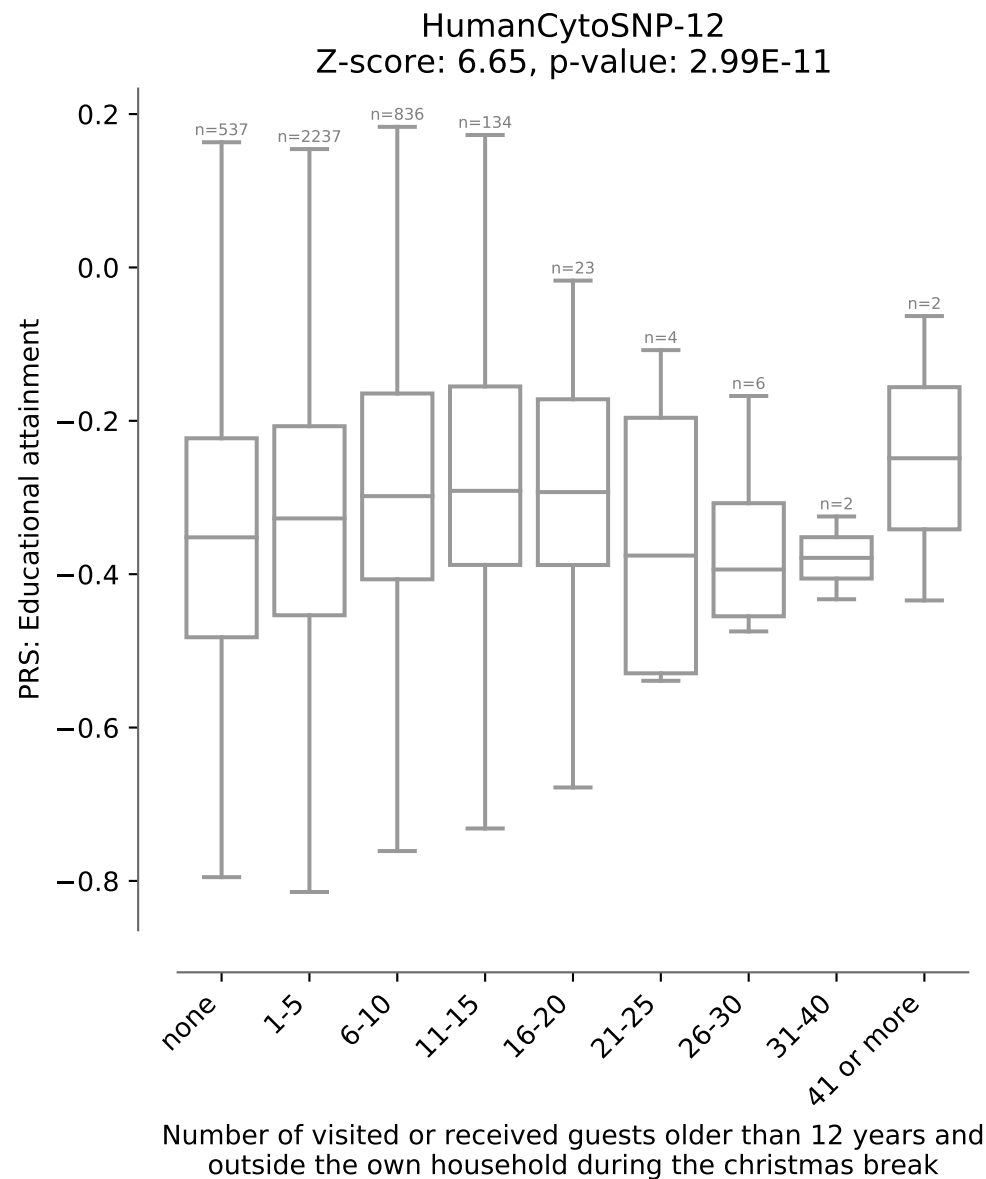

Concerned about the COVID-19 pandemic  
PGS: Life satisfaction  
Meta analysis Z-score: -6.36, p-value: 2.04E-10

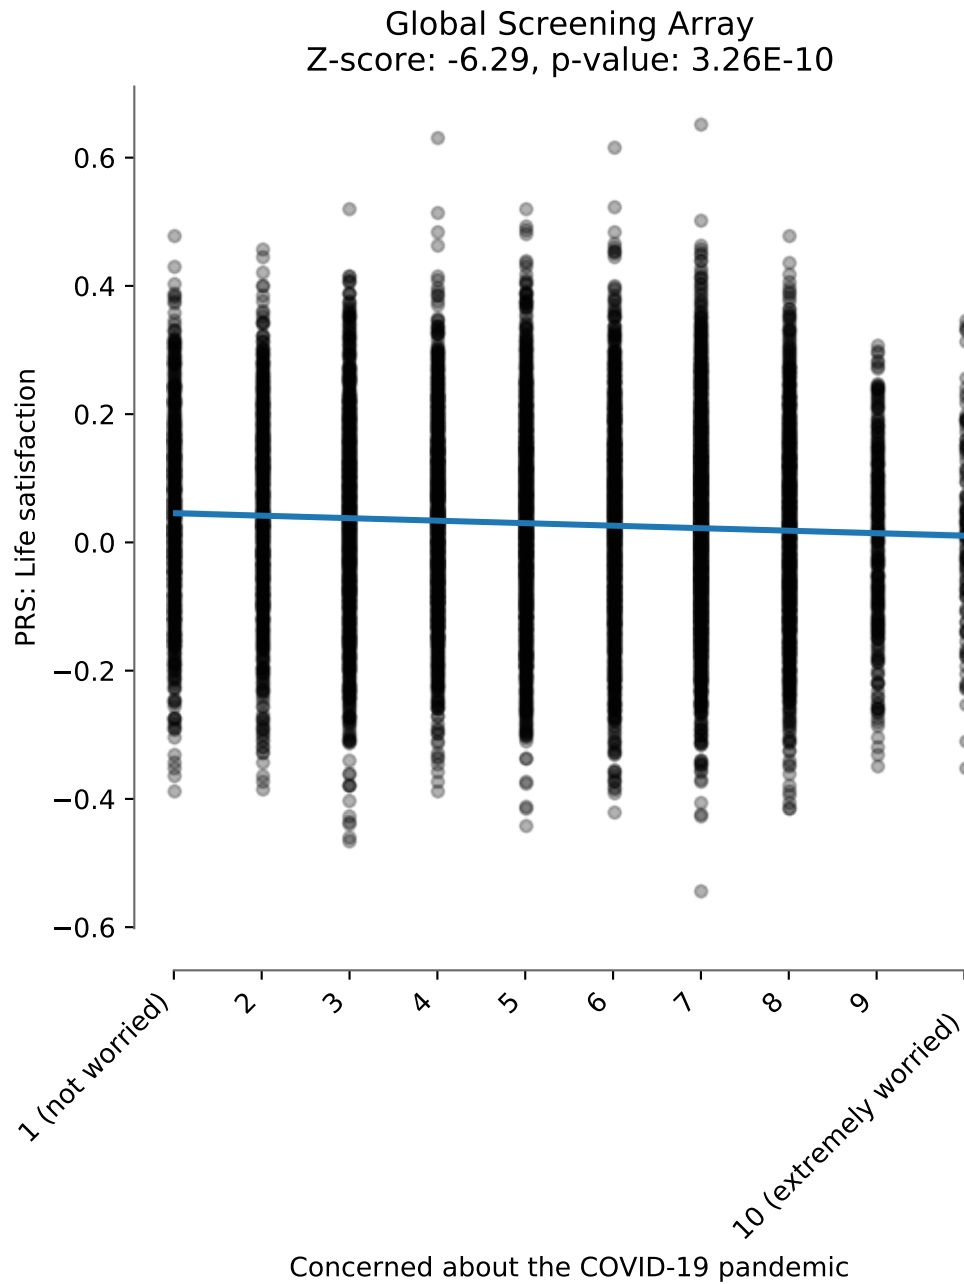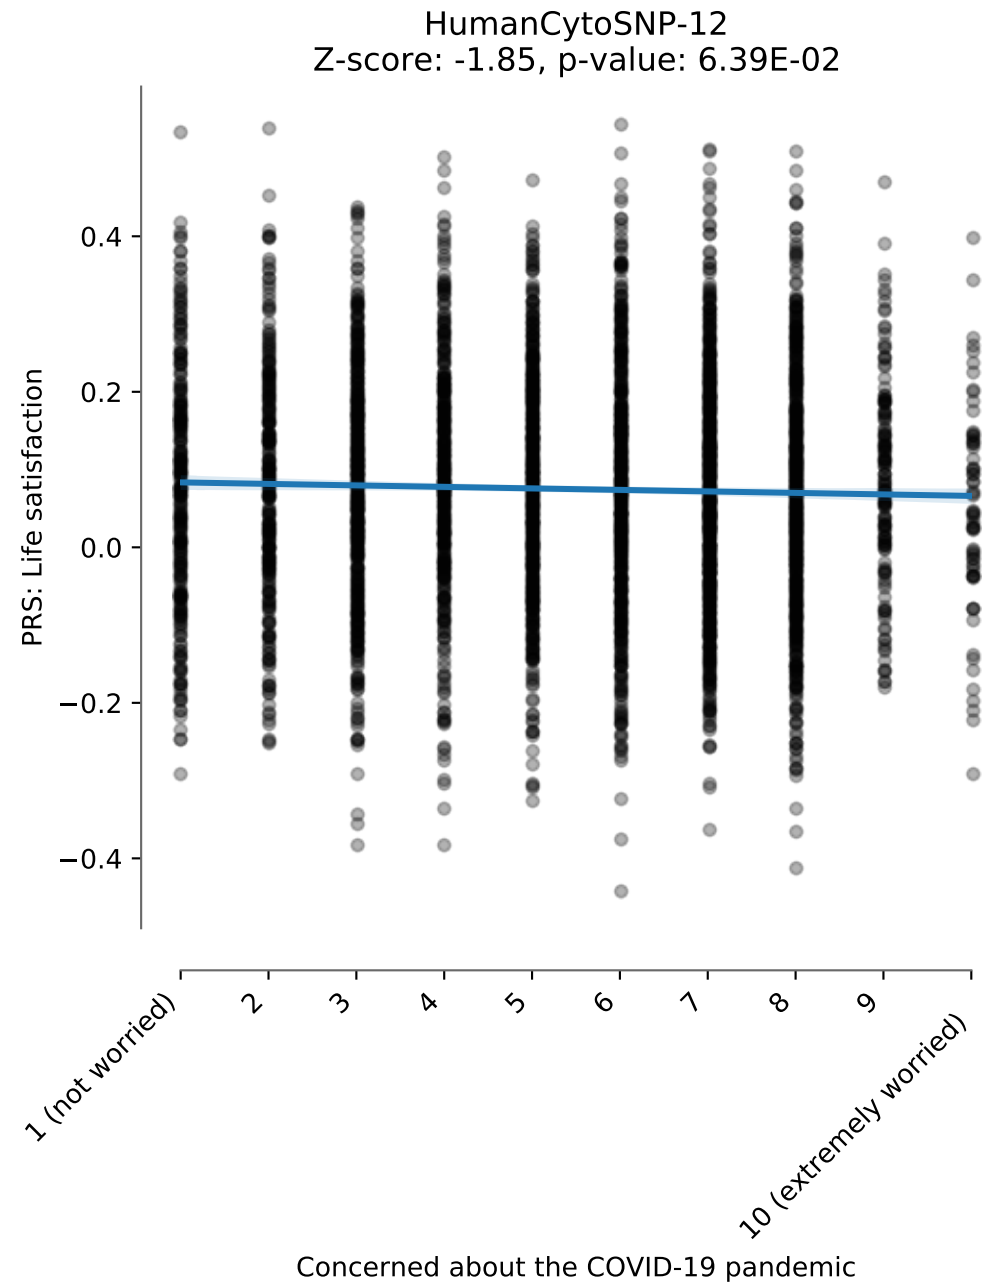

Concerned about the COVID-19 pandemic  
PGS: Neuroticism  
Meta analysis Z-score: 7.89, p-value: 2.98E-15

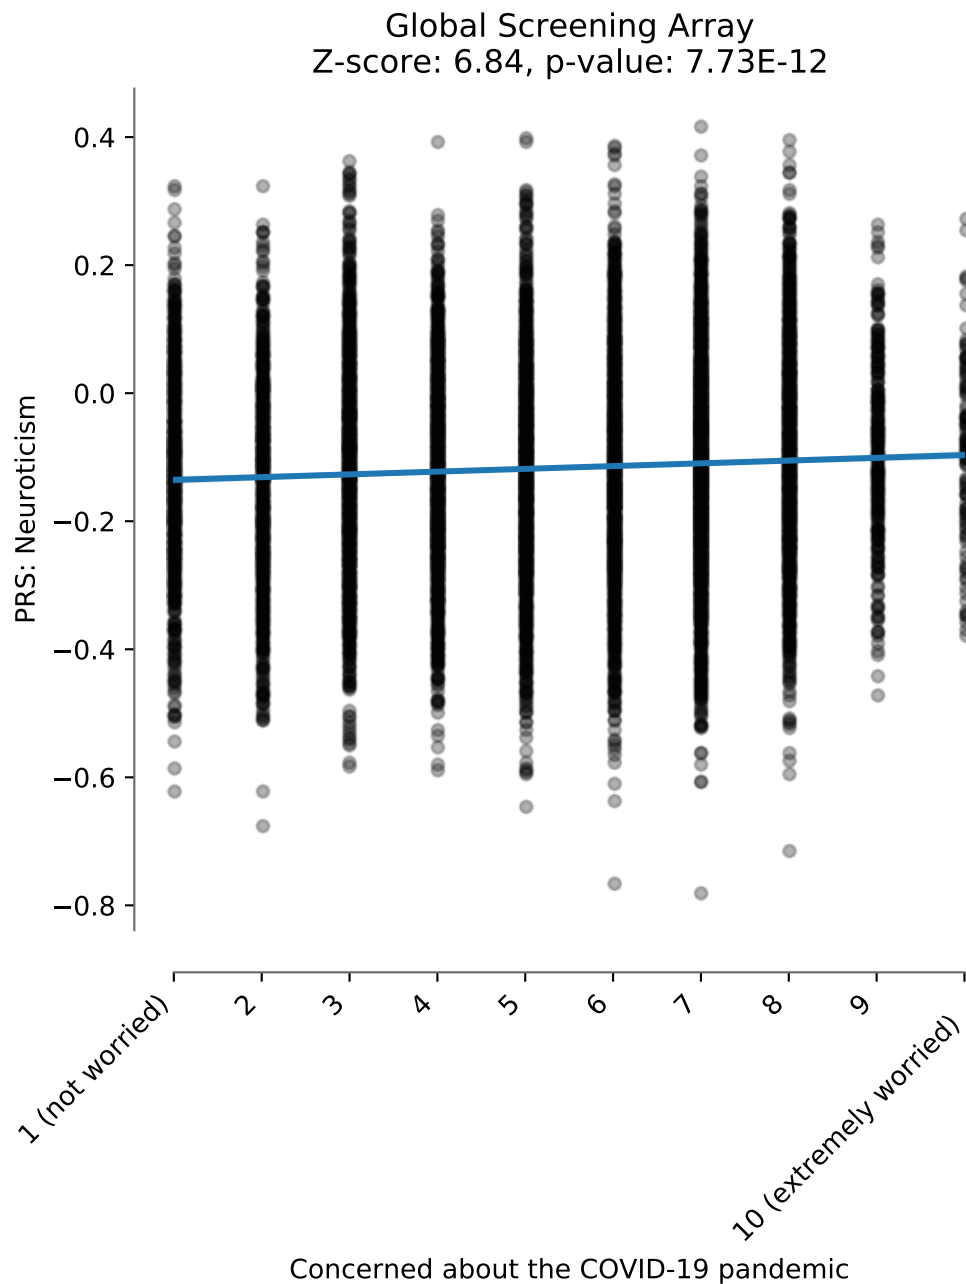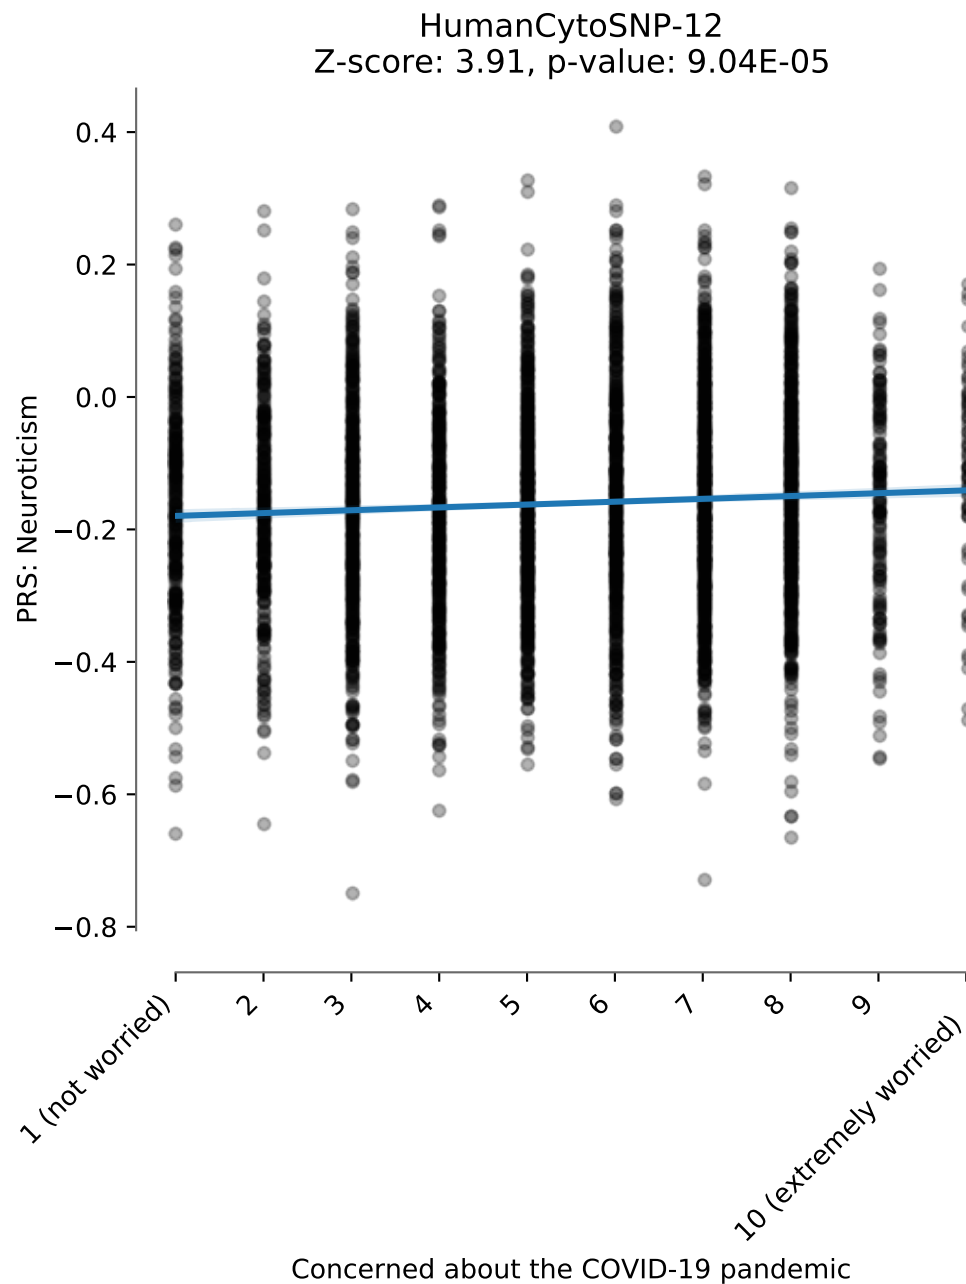

Concerned about the COVID-19 pandemic  
PGS: Schizophrenia  
Meta analysis Z-score: 4.56, p-value: 5.00E-06

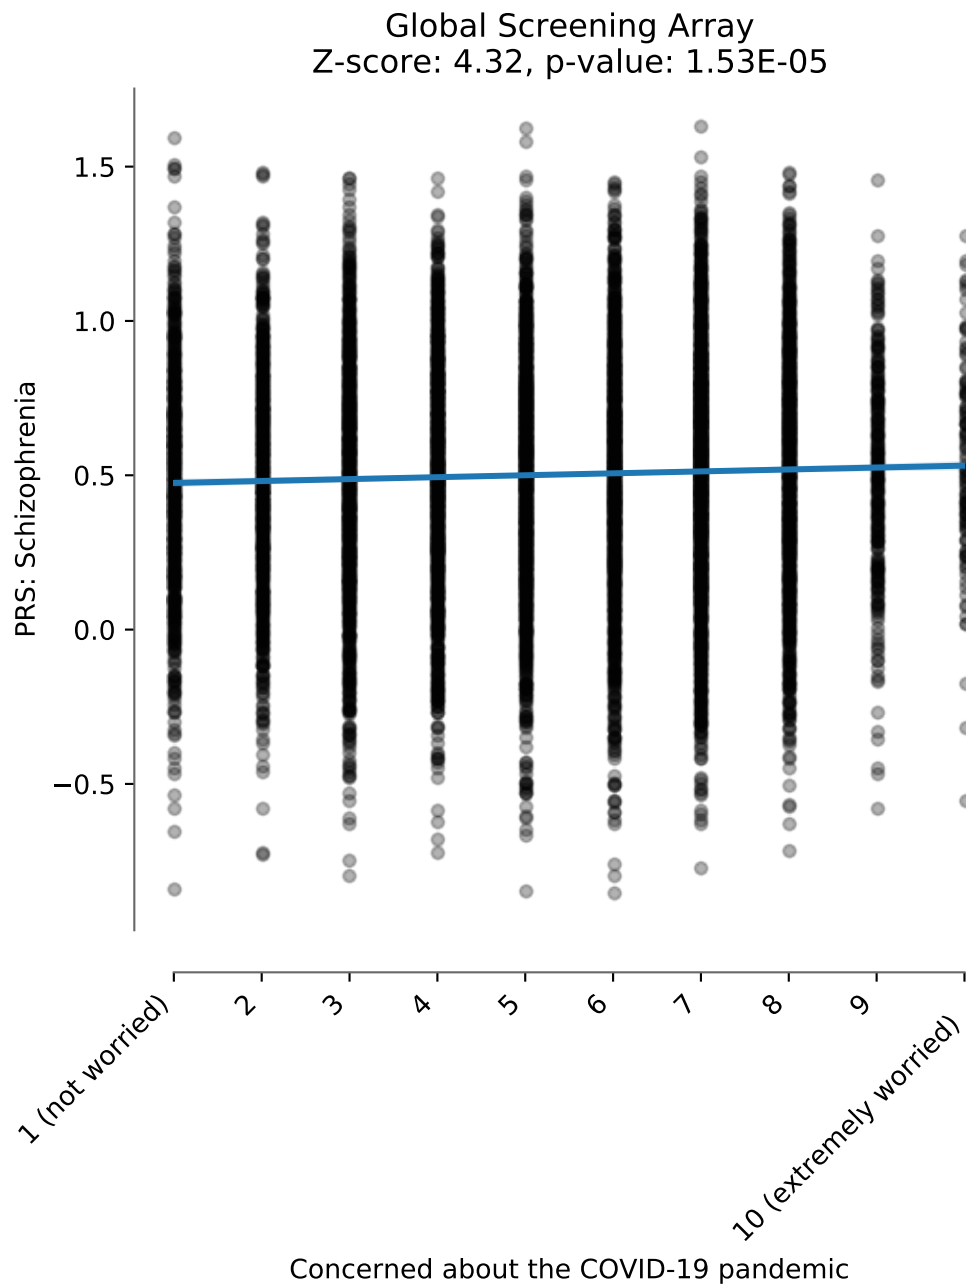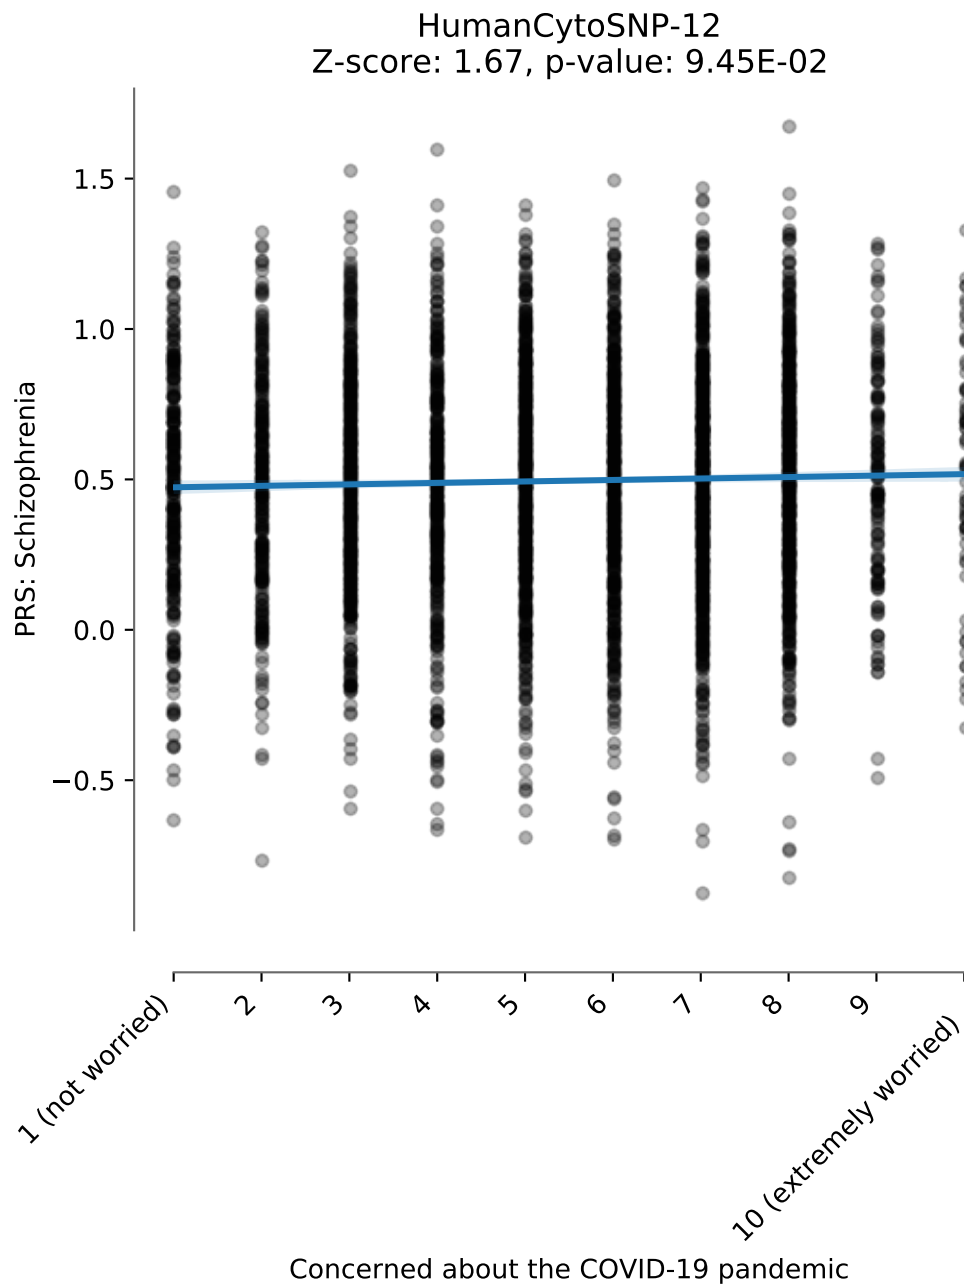

Concerned about the COVID-19 pandemic  
PGS: Worry/vulnerability  
Meta analysis Z-score: 5.41, p-value: 6.21E-08

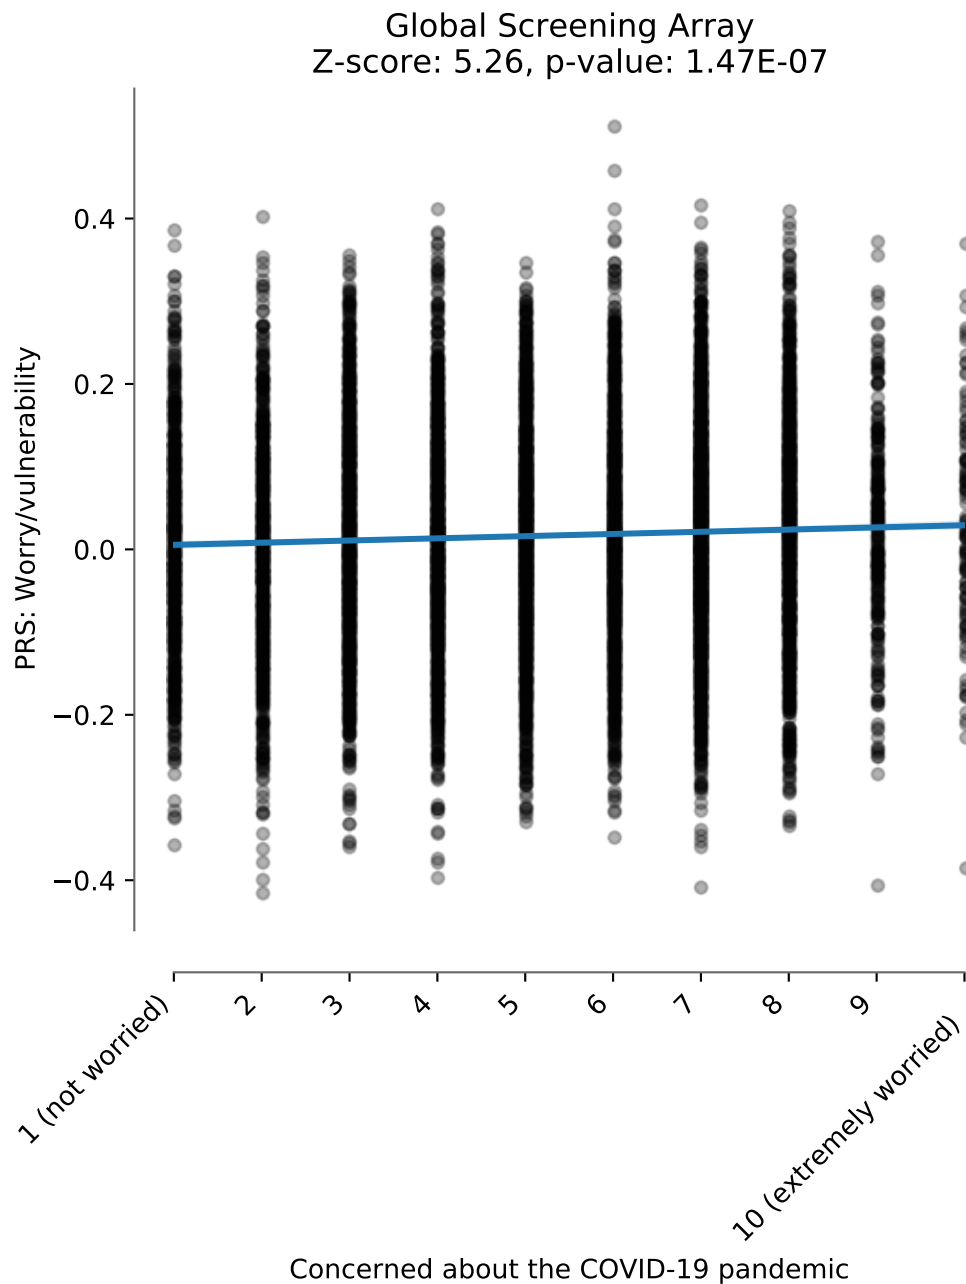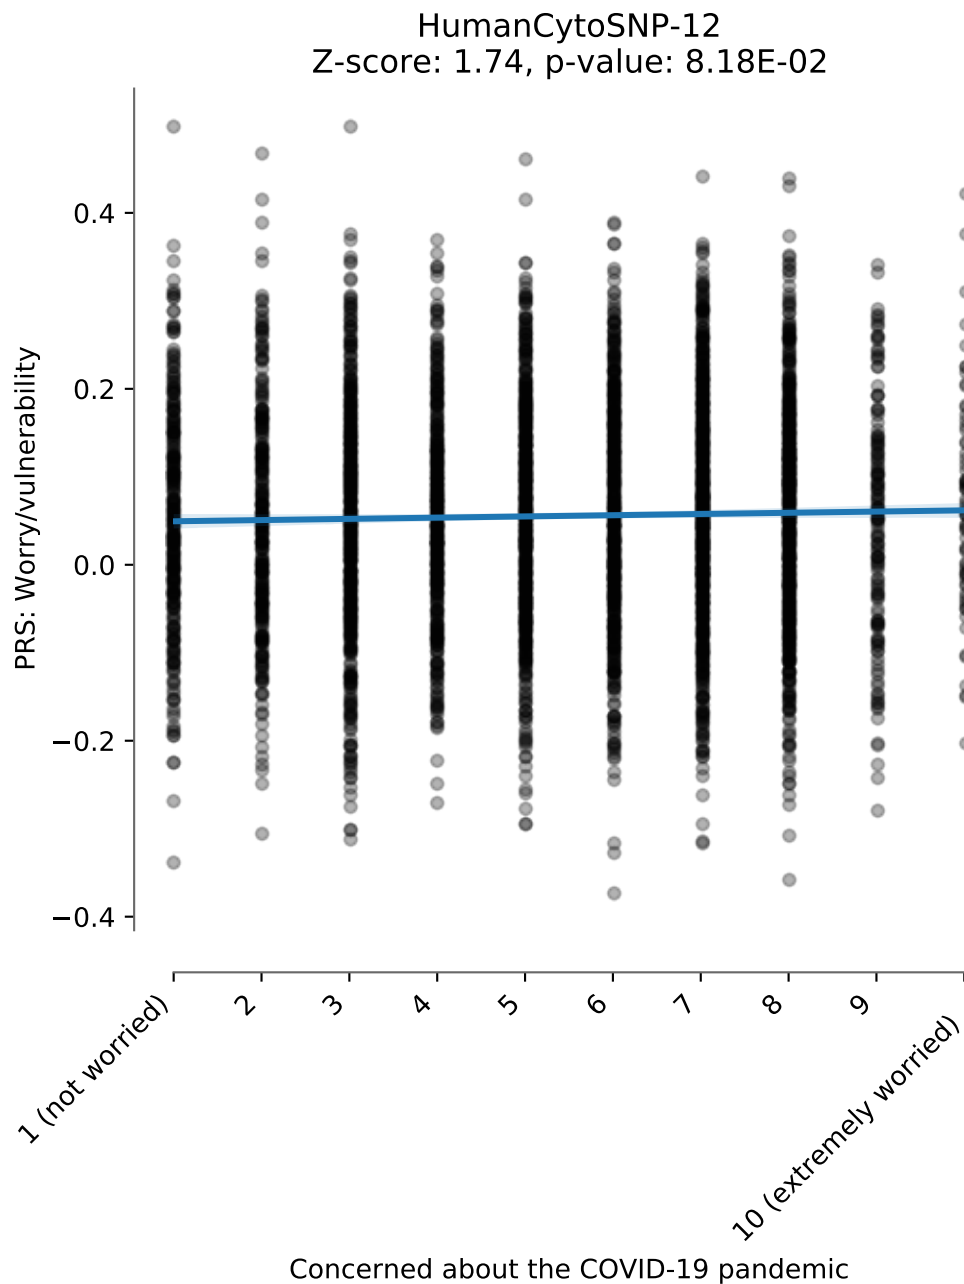

Had headache  
PGS: Depression  
Meta analysis Z-score: 4.67, p-value: 3.07E-06

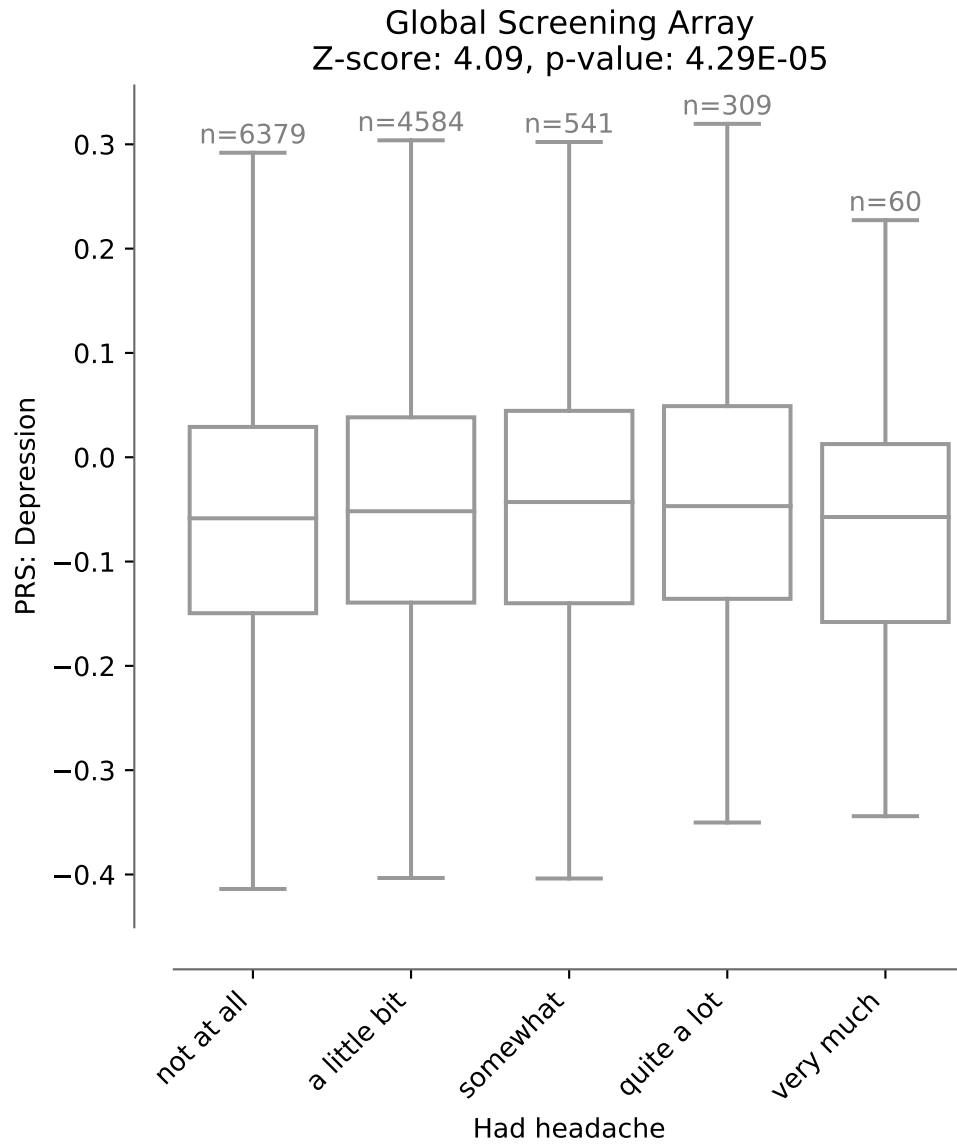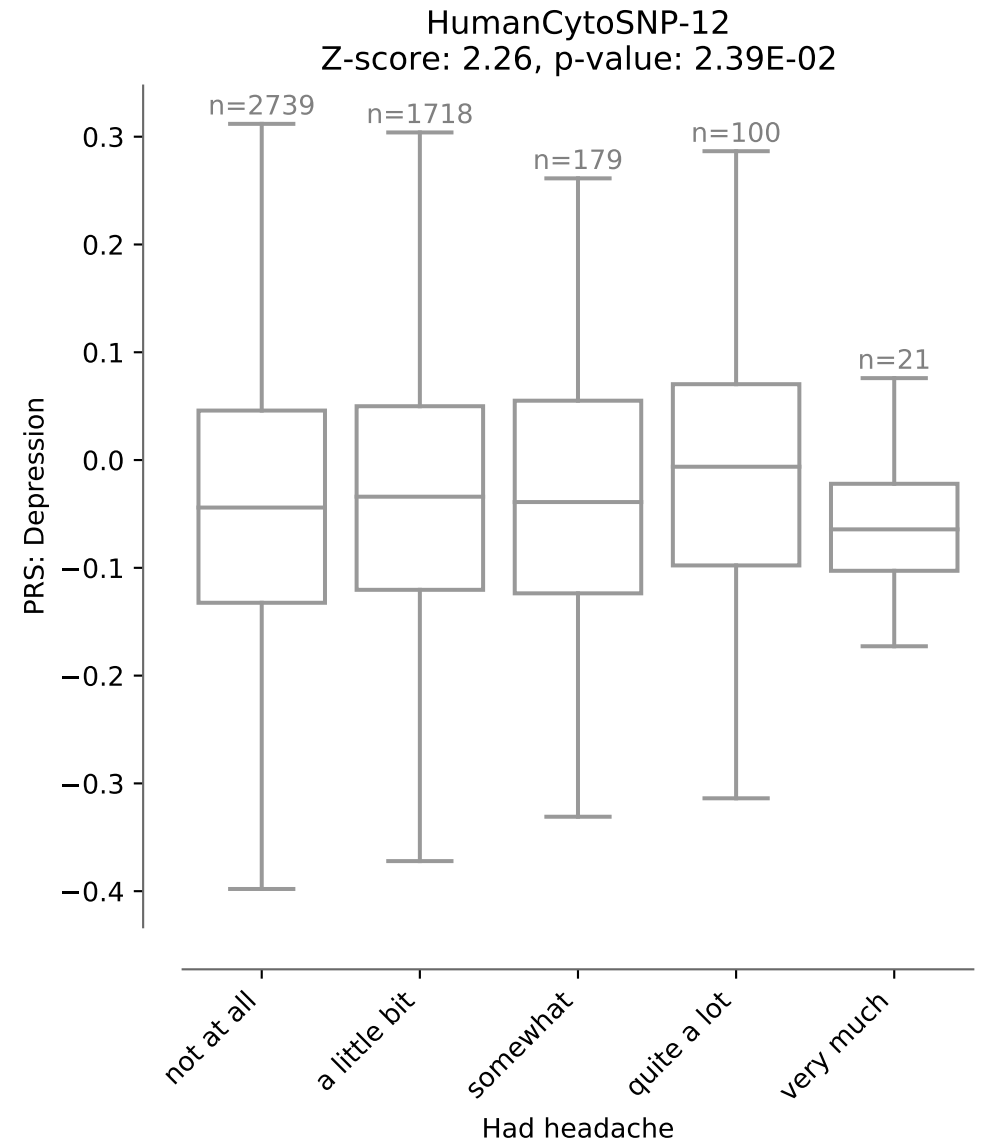

Had headache  
PGS: Life satisfaction  
Meta analysis Z-score: -6.72, p-value: 1.78E-11

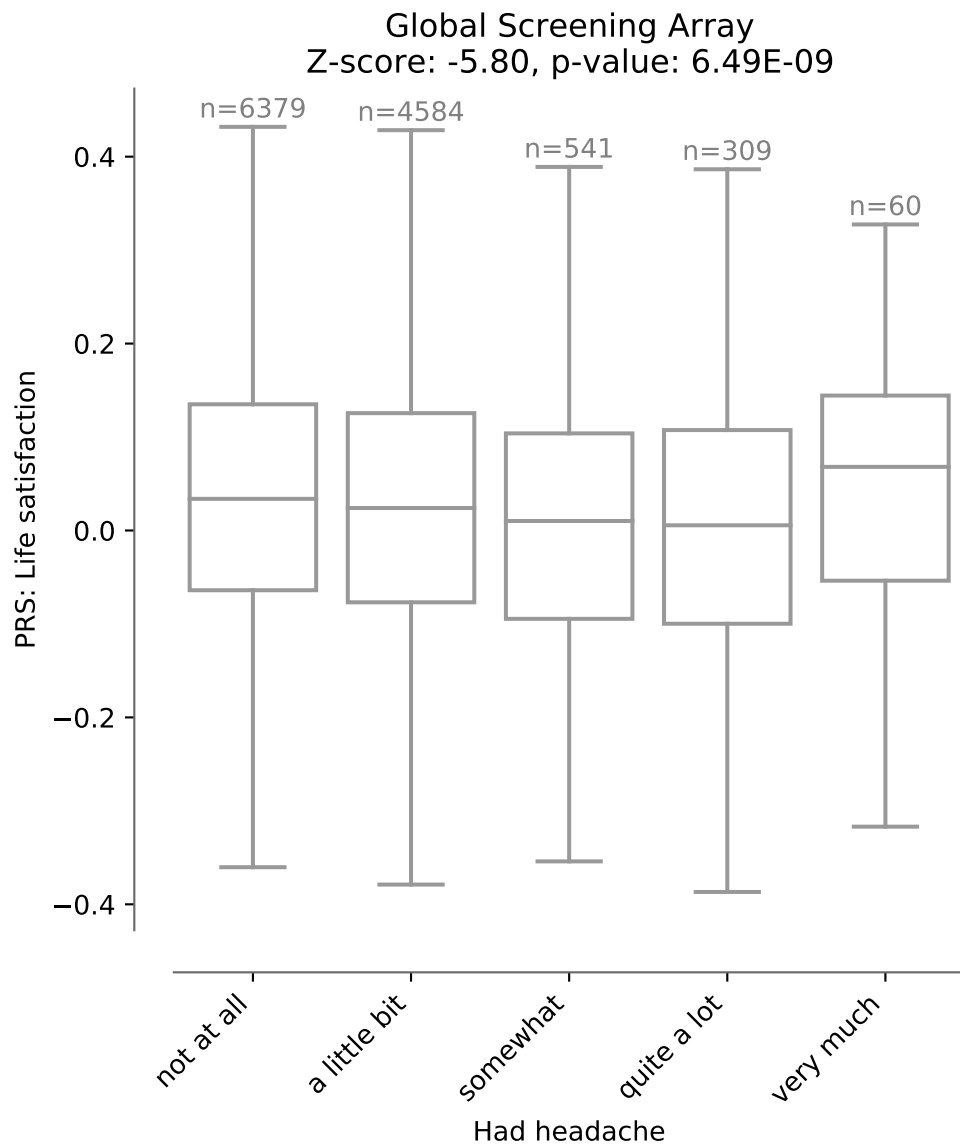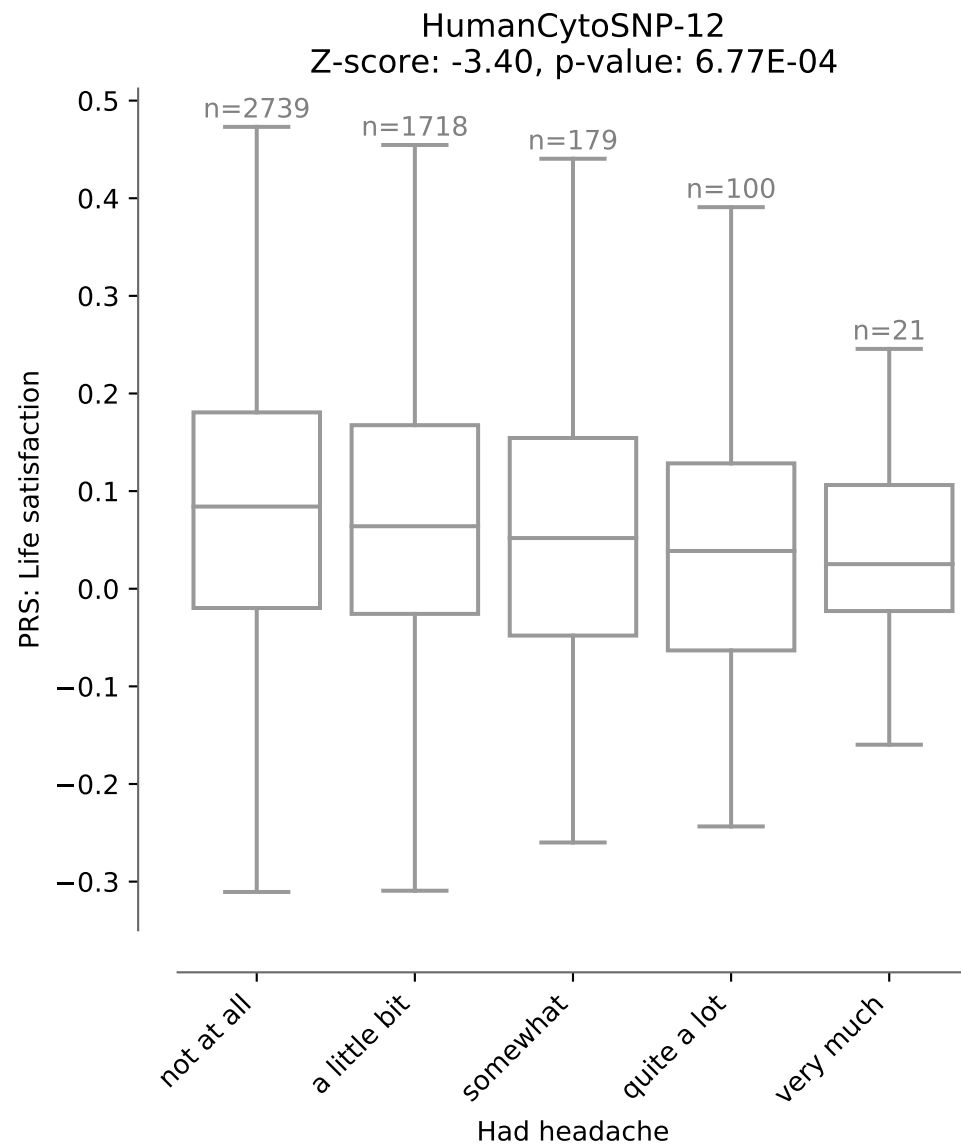

Had headache  
PGS: Neuroticism  
Meta analysis Z-score: 6.26, p-value: 3.76E-10

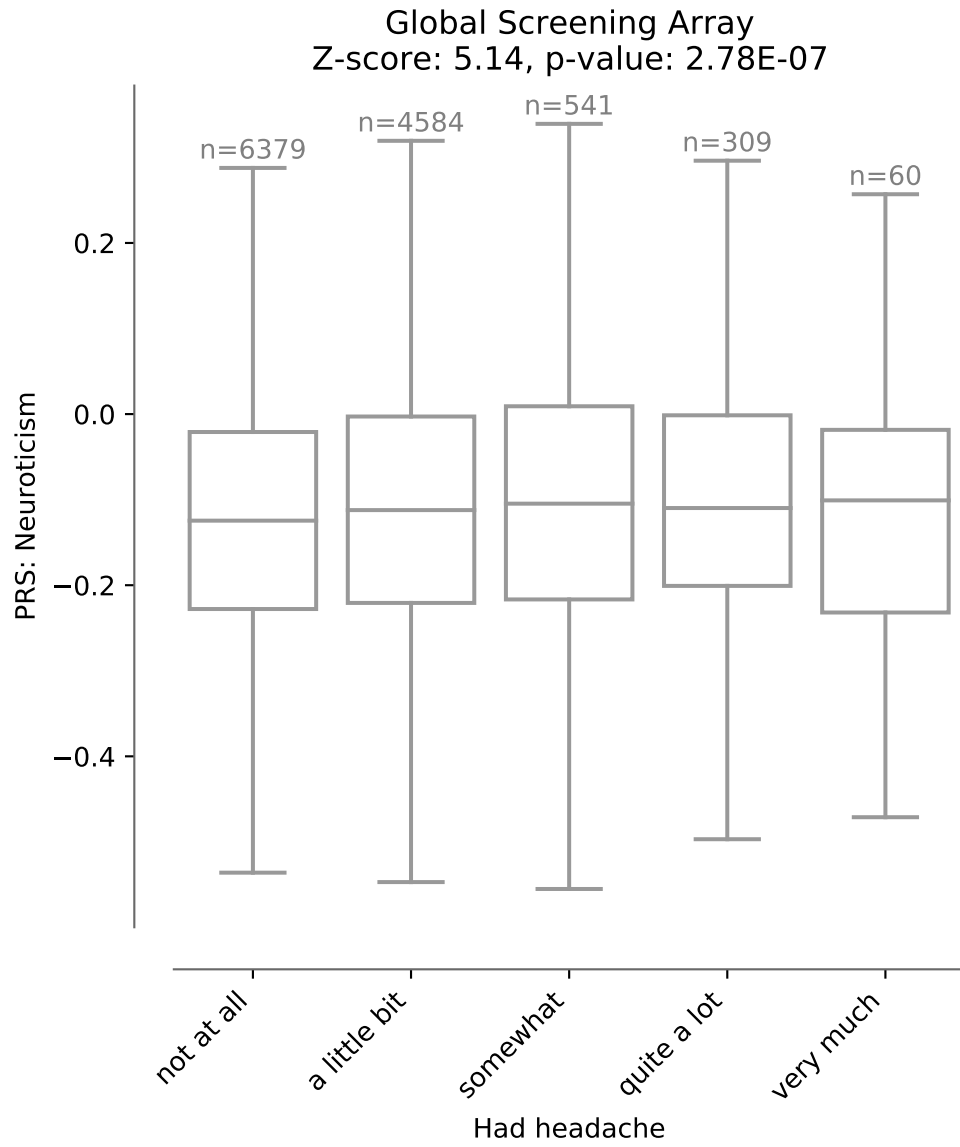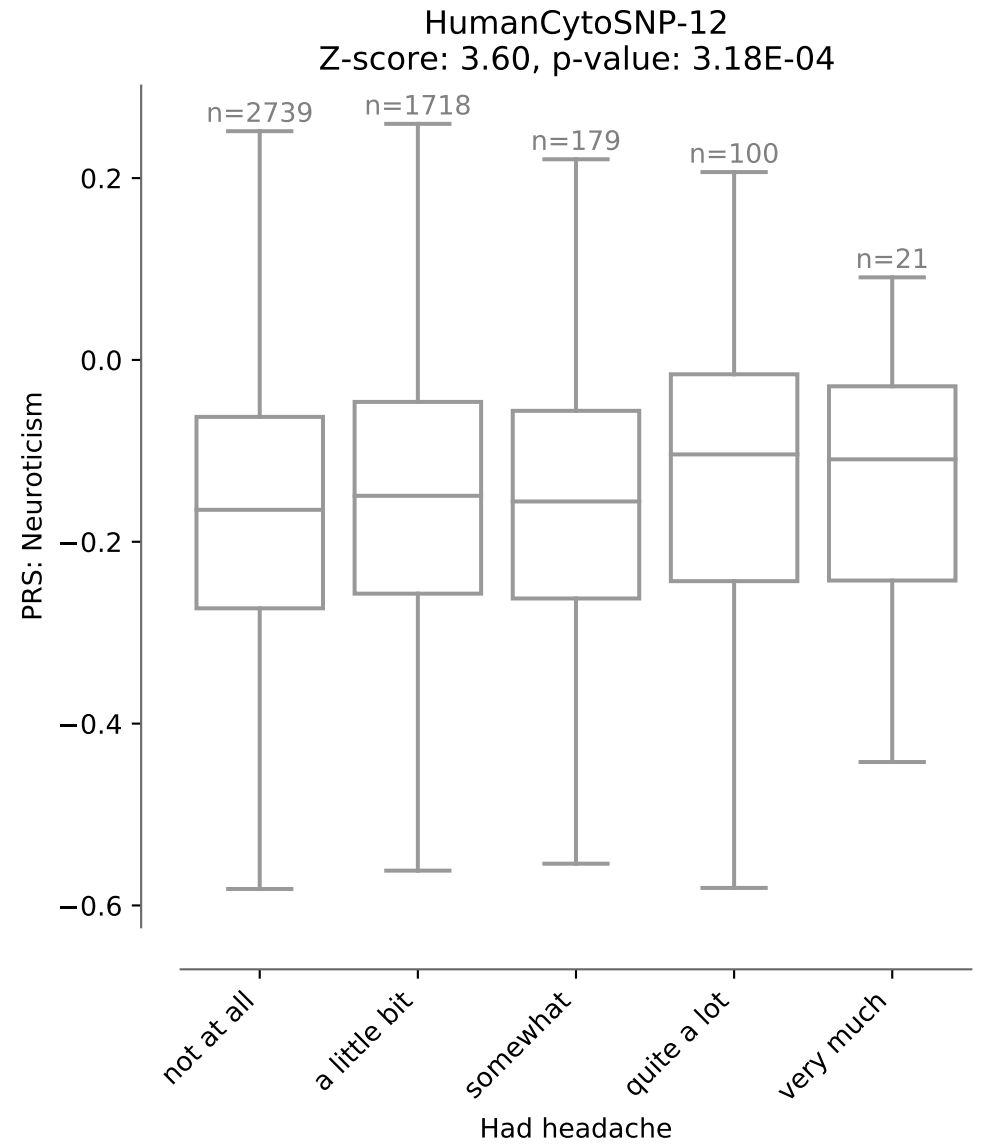



Belief that is not that bad when something bad happens  
PGS: Educational attainment  
Meta analysis Z-score: 7.71, p-value: 1.29E-14

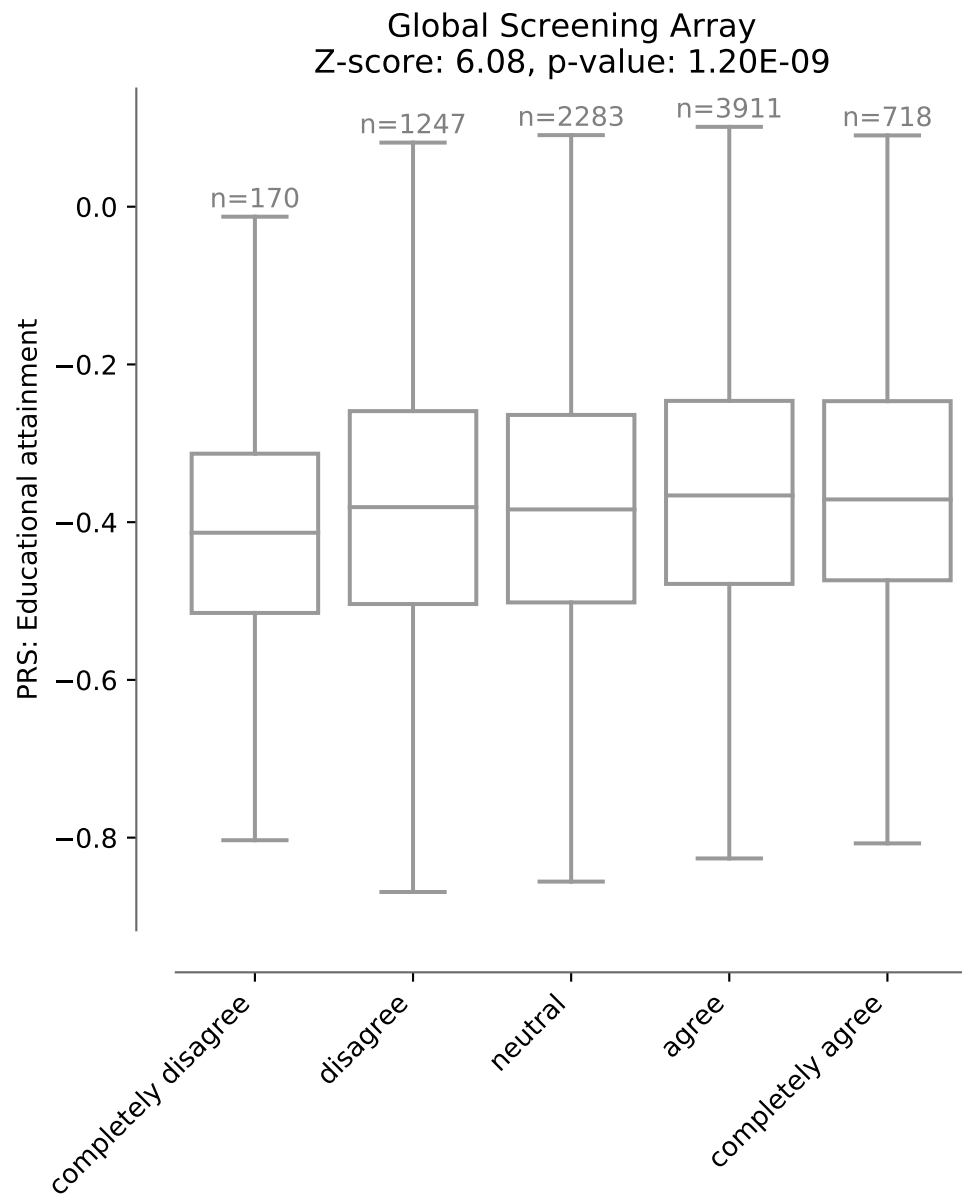

Belief that is not that bad when something bad happens

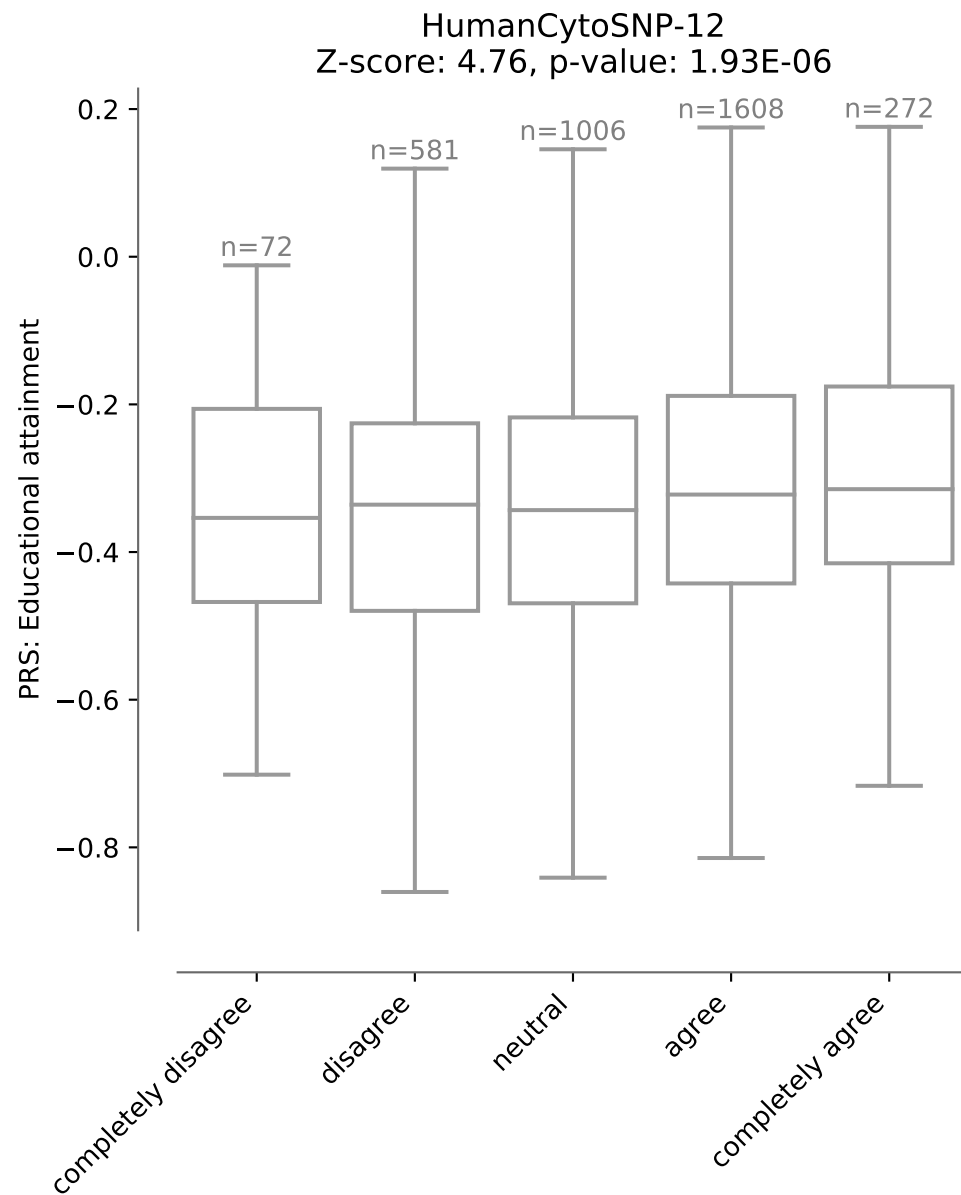

Belief that is not that bad when something bad happens

Belief that is not that bad when something bad happens

PGS: Neuroticism

Meta analysis Z-score: -4.66, p-value: 3.09E-06

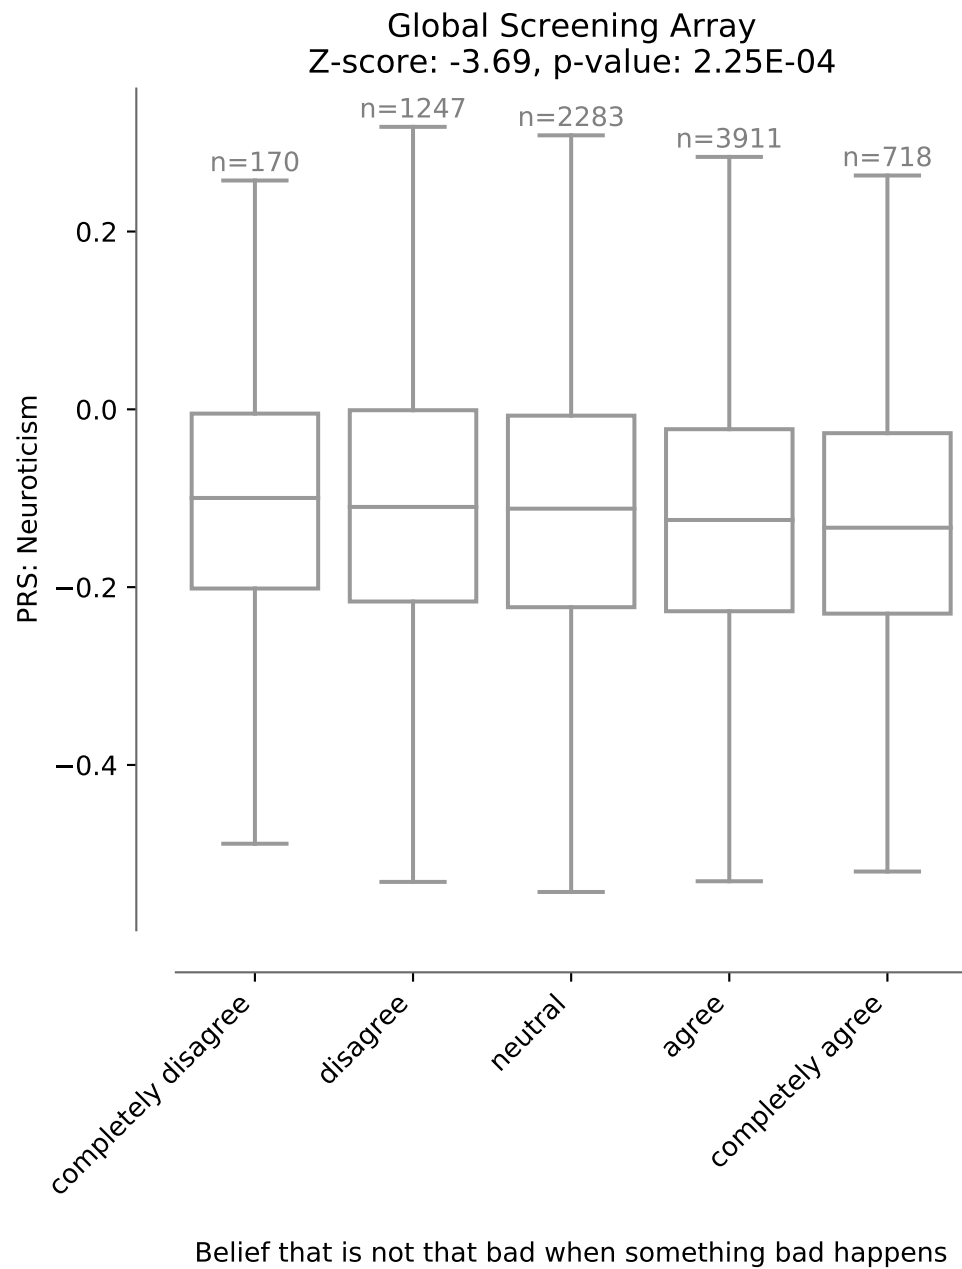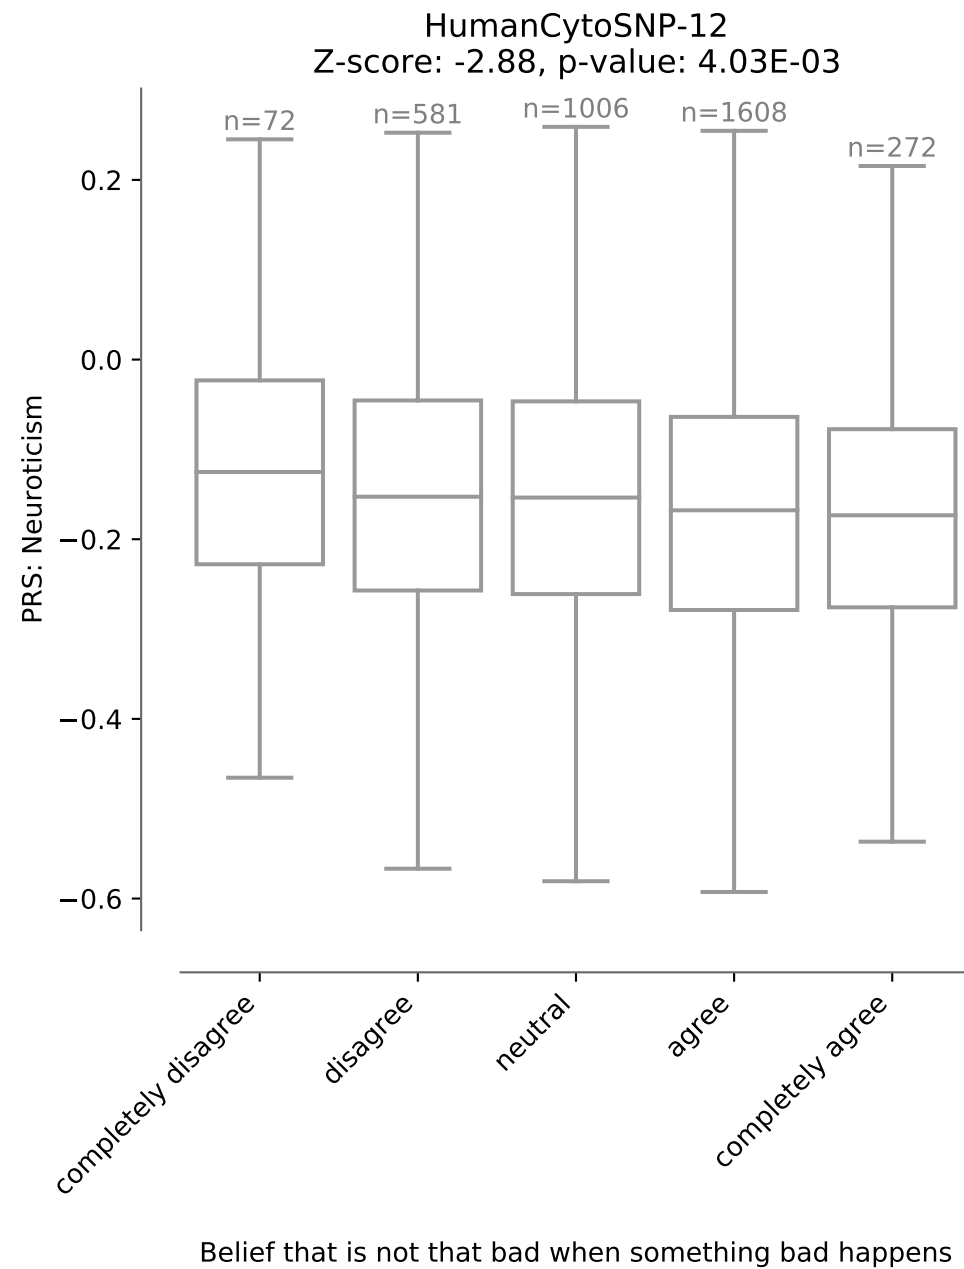

Belief that acceptance is necessary when something bad happens

PGS: Educational attainment

Meta analysis Z-score: 5.76, p-value: 8.34E-09

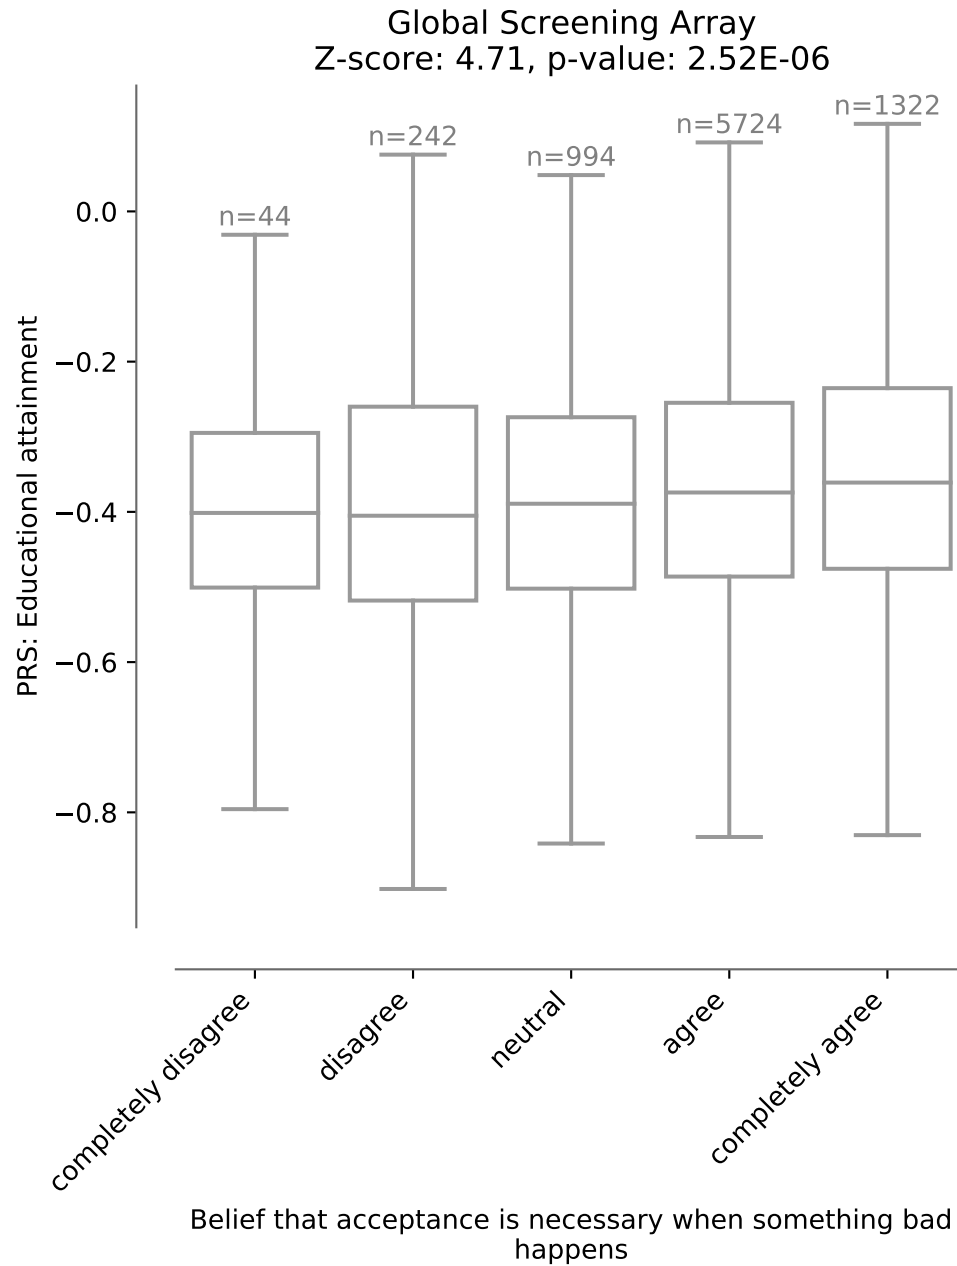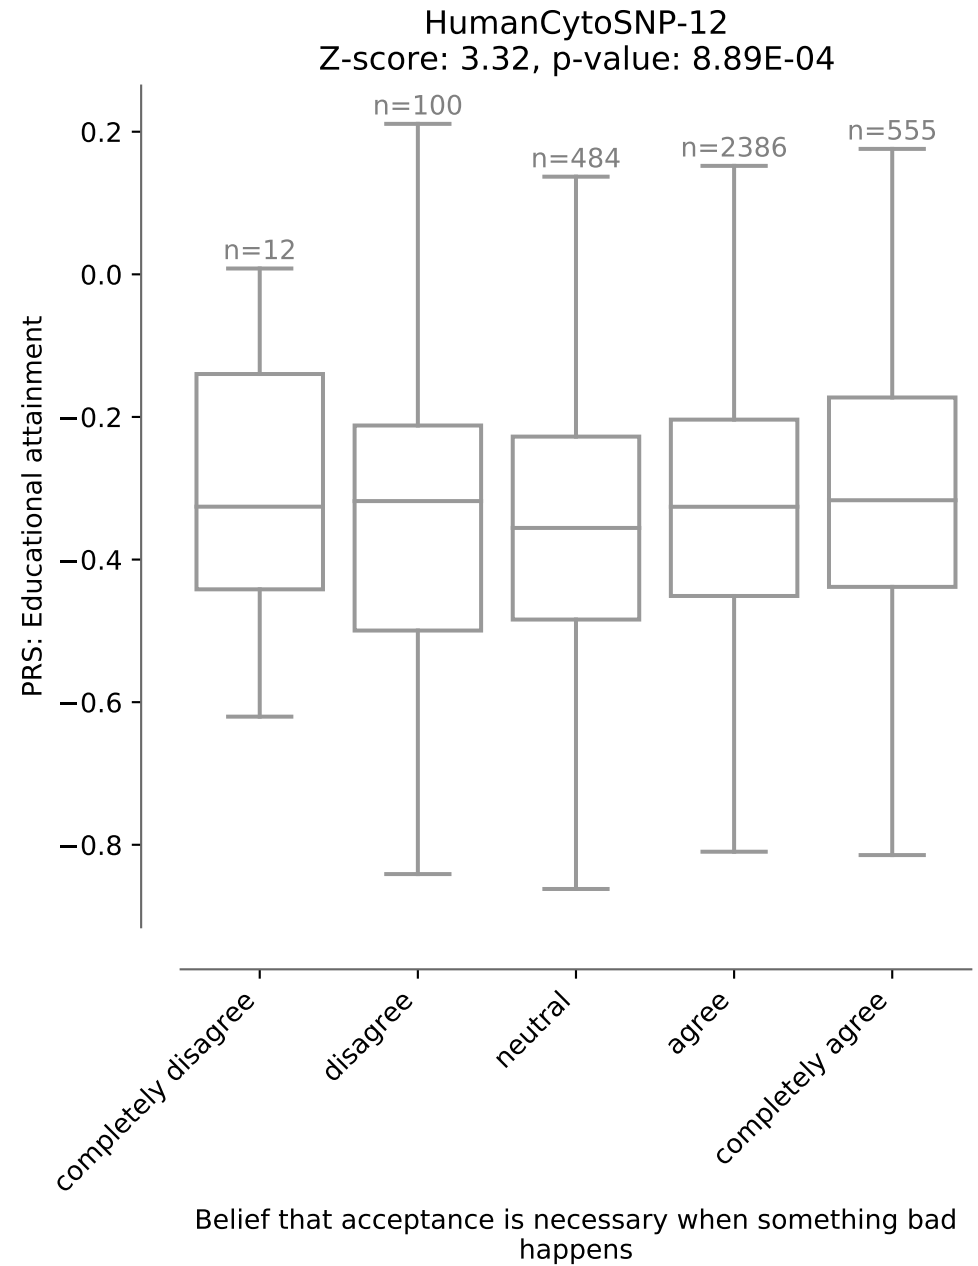

Fear things will go wrong in society  
PGS: Educational attainment  
Meta analysis Z-score: -4.82, p-value: 1.41E-06

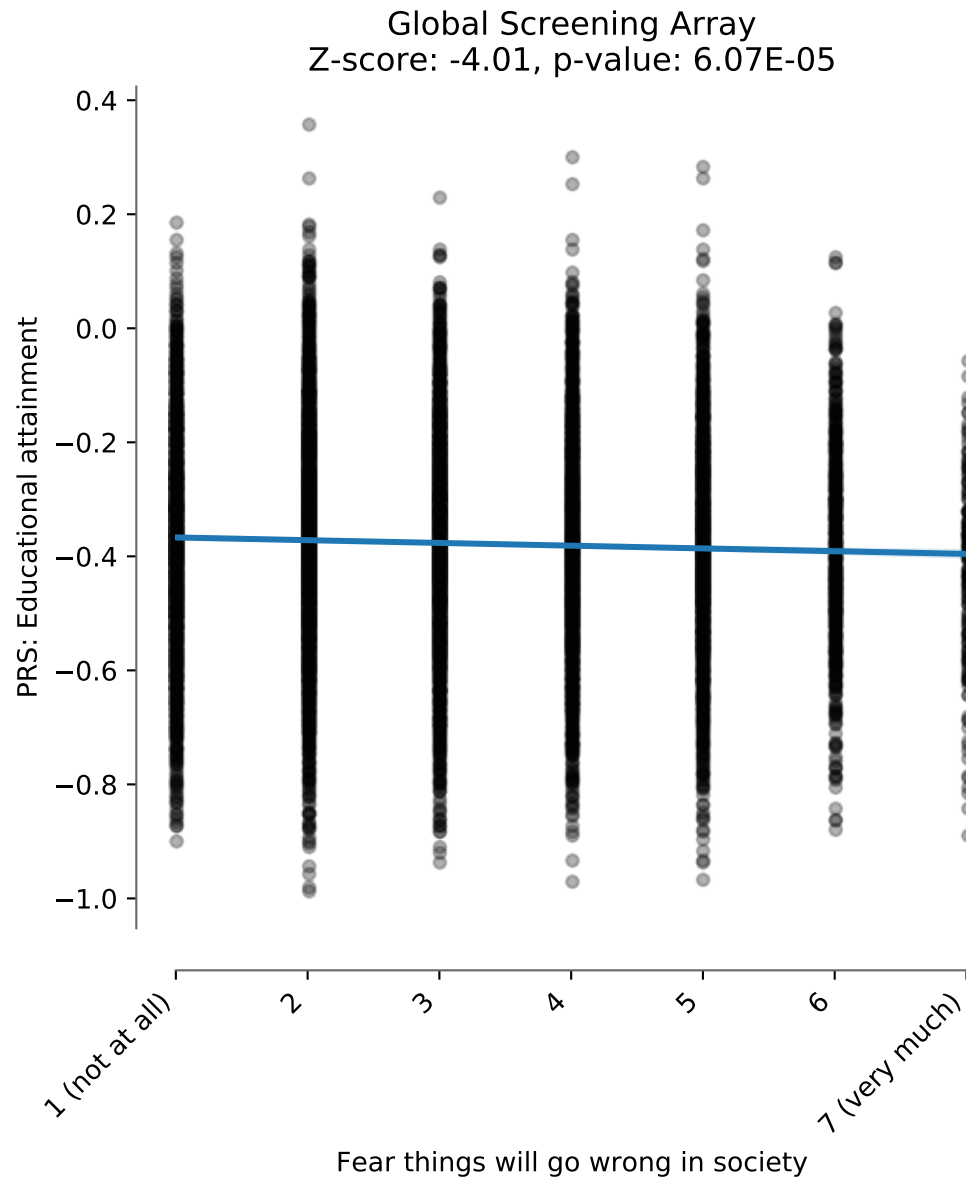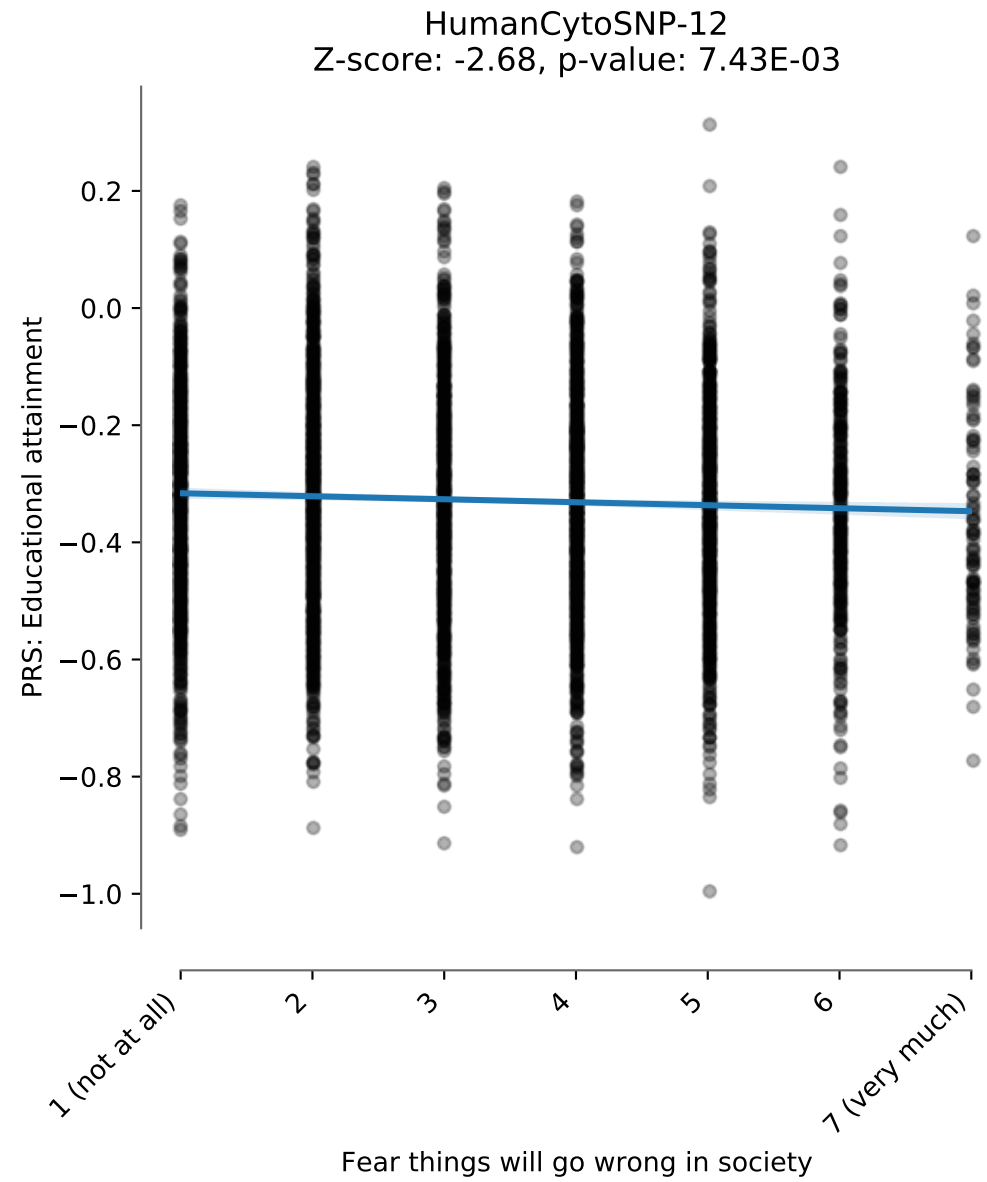

Fear things will go wrong in society  
PGS: Life satisfaction  
Meta analysis Z-score: -8.43, p-value: 3.38E-17

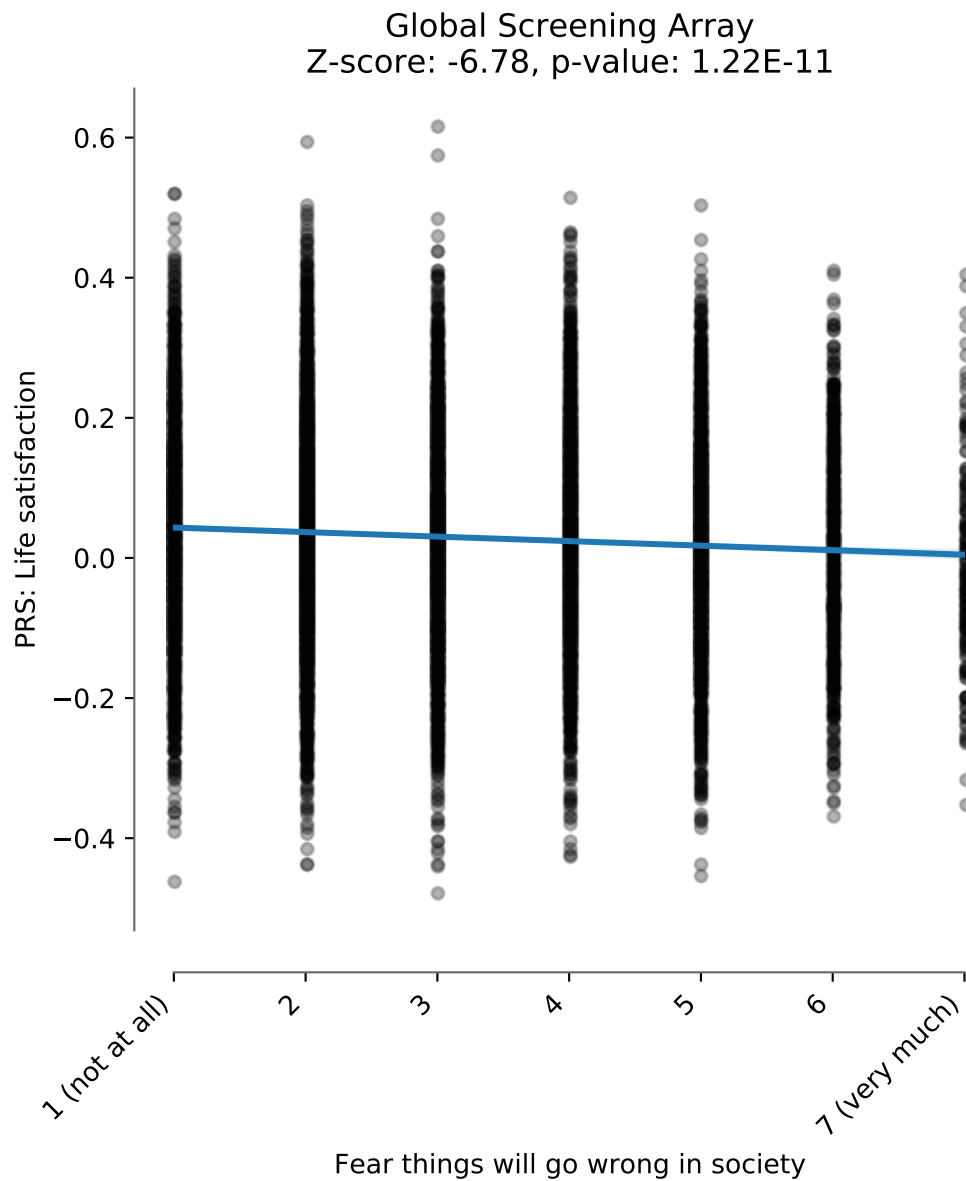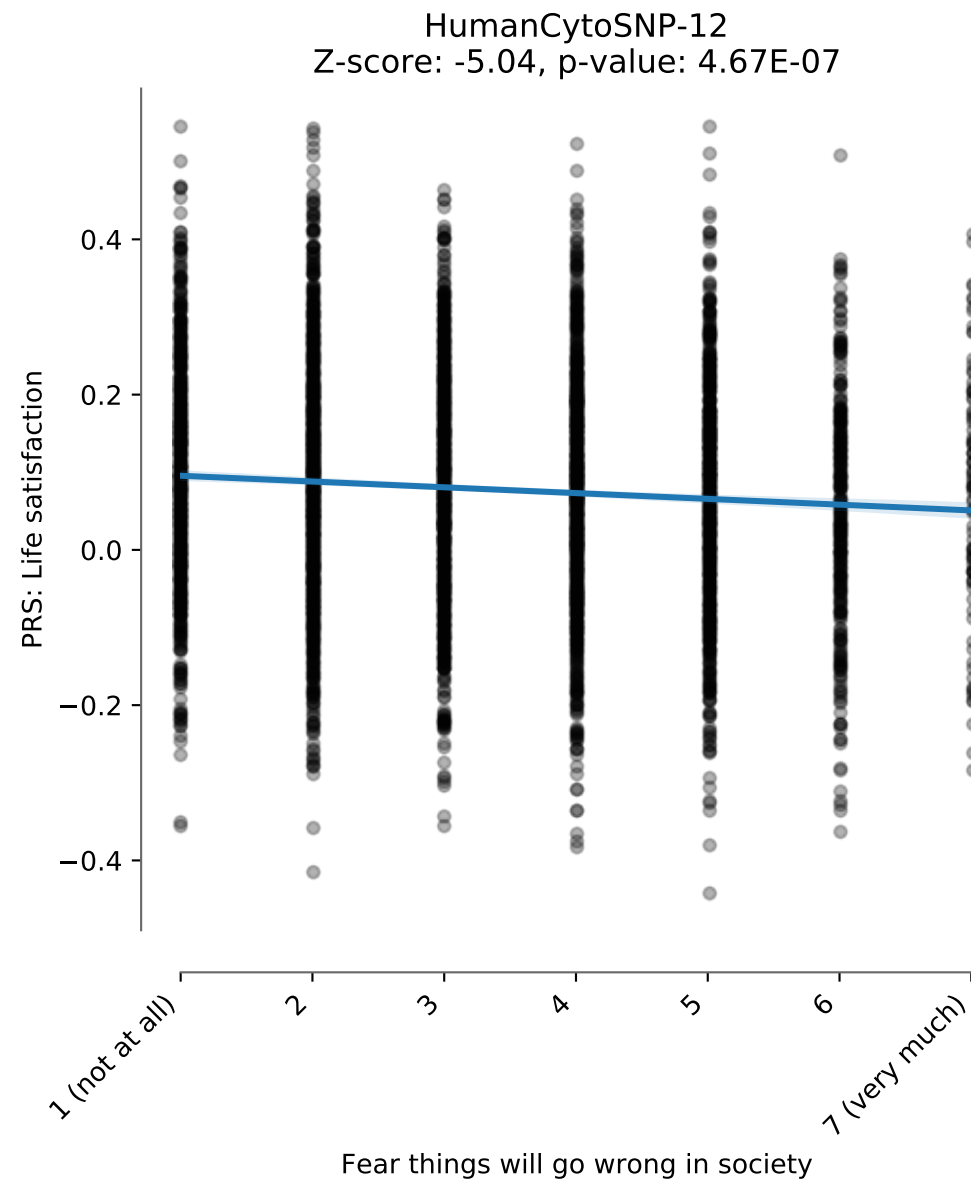

Fear things will go wrong in society  
PGS: Neuroticism  
Meta analysis Z-score: 8.74, p-value: 2.33E-18

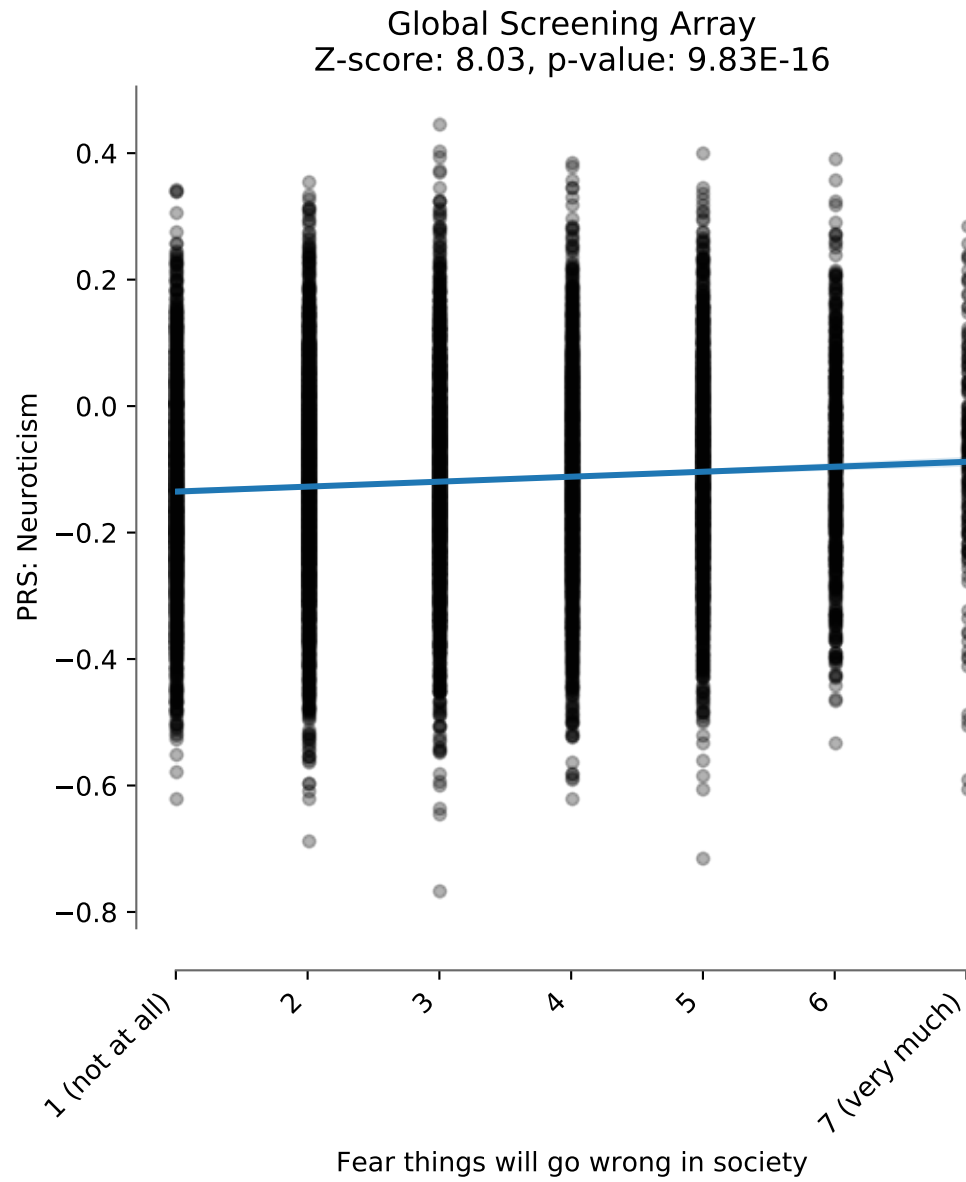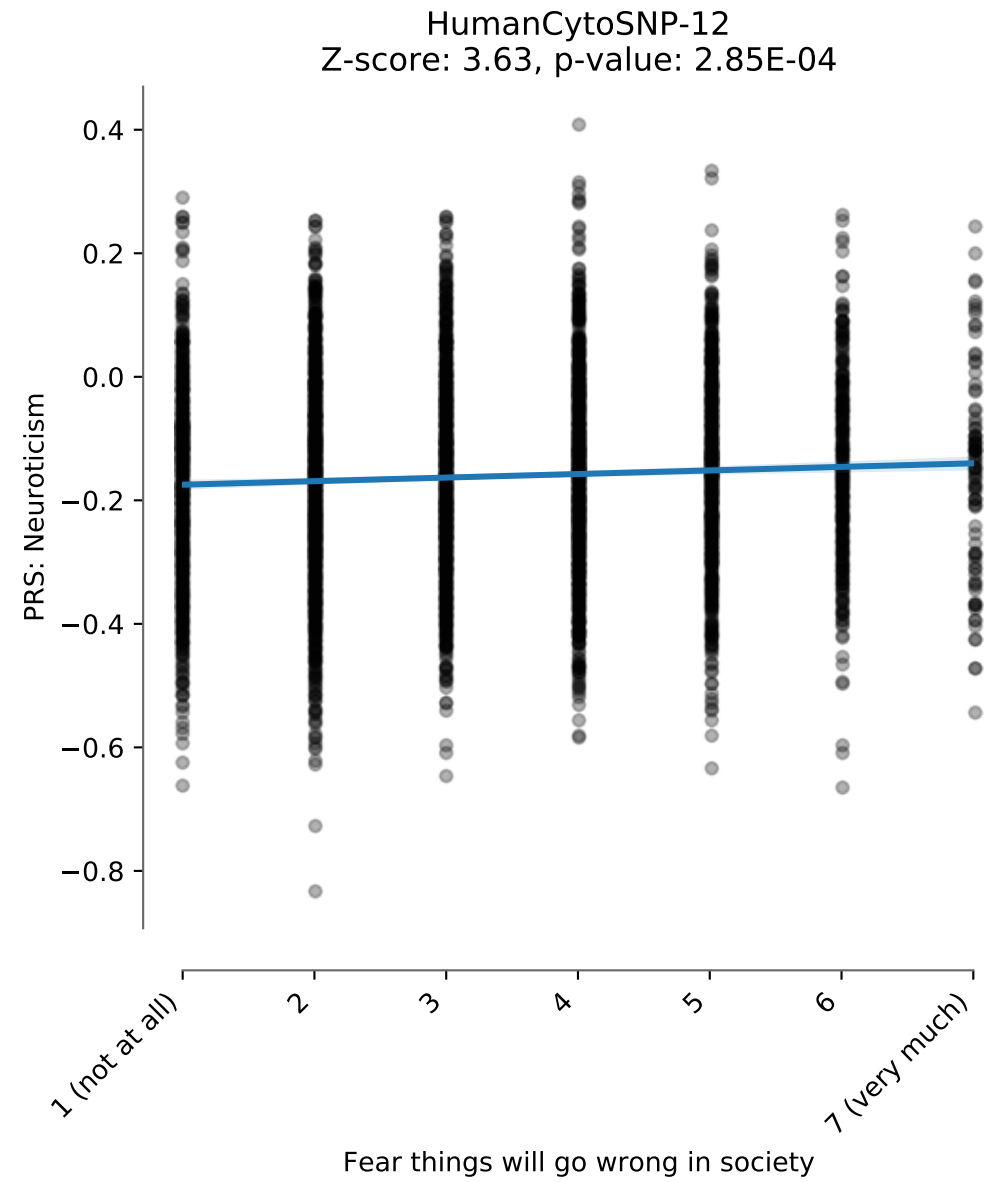

Being afraid of the important ground rights more easily swept aside in the future

PGS: BMI

Meta analysis Z-score: 4.88, p-value: 1.08E-06

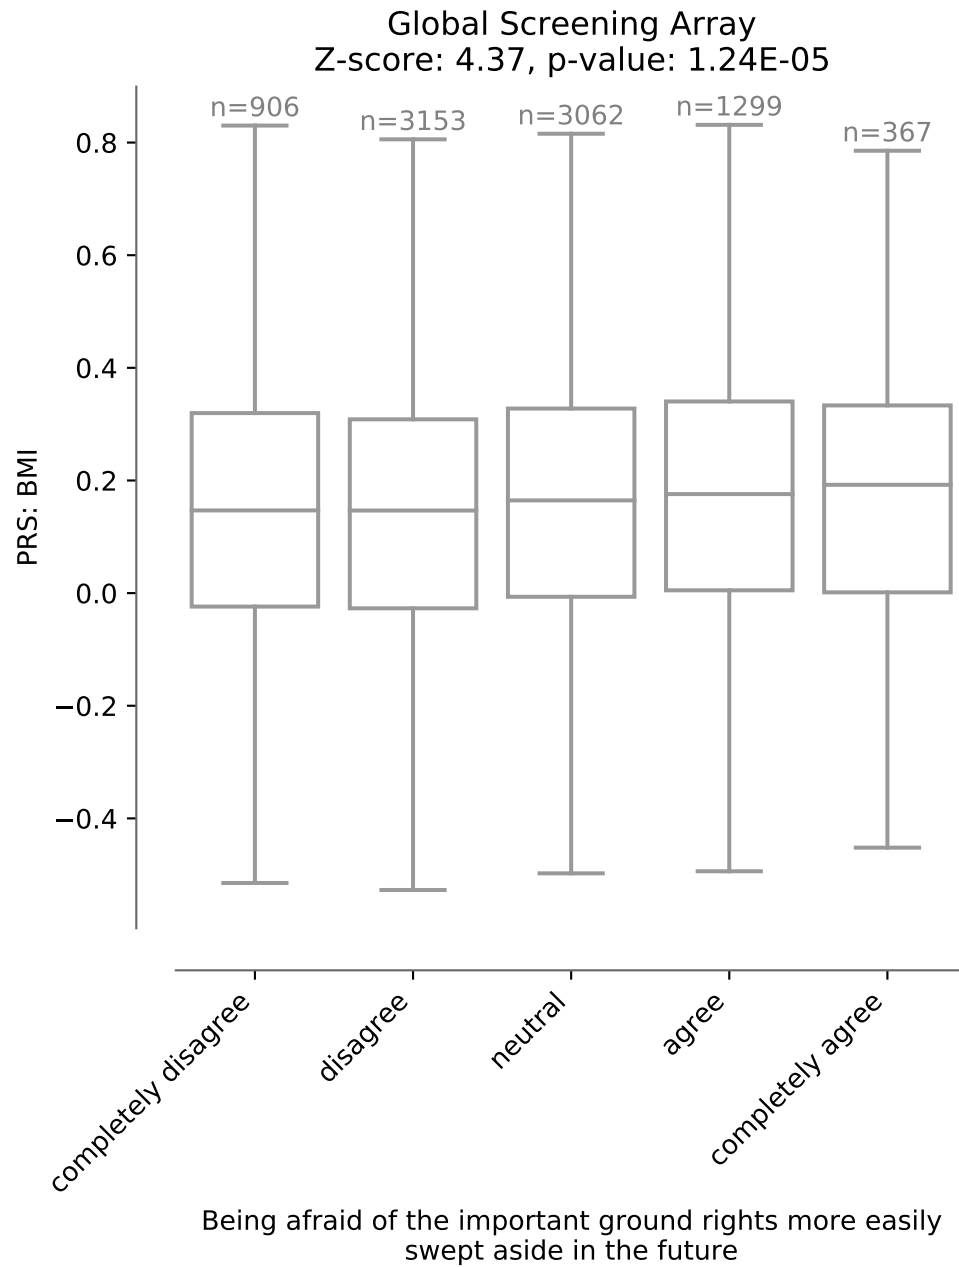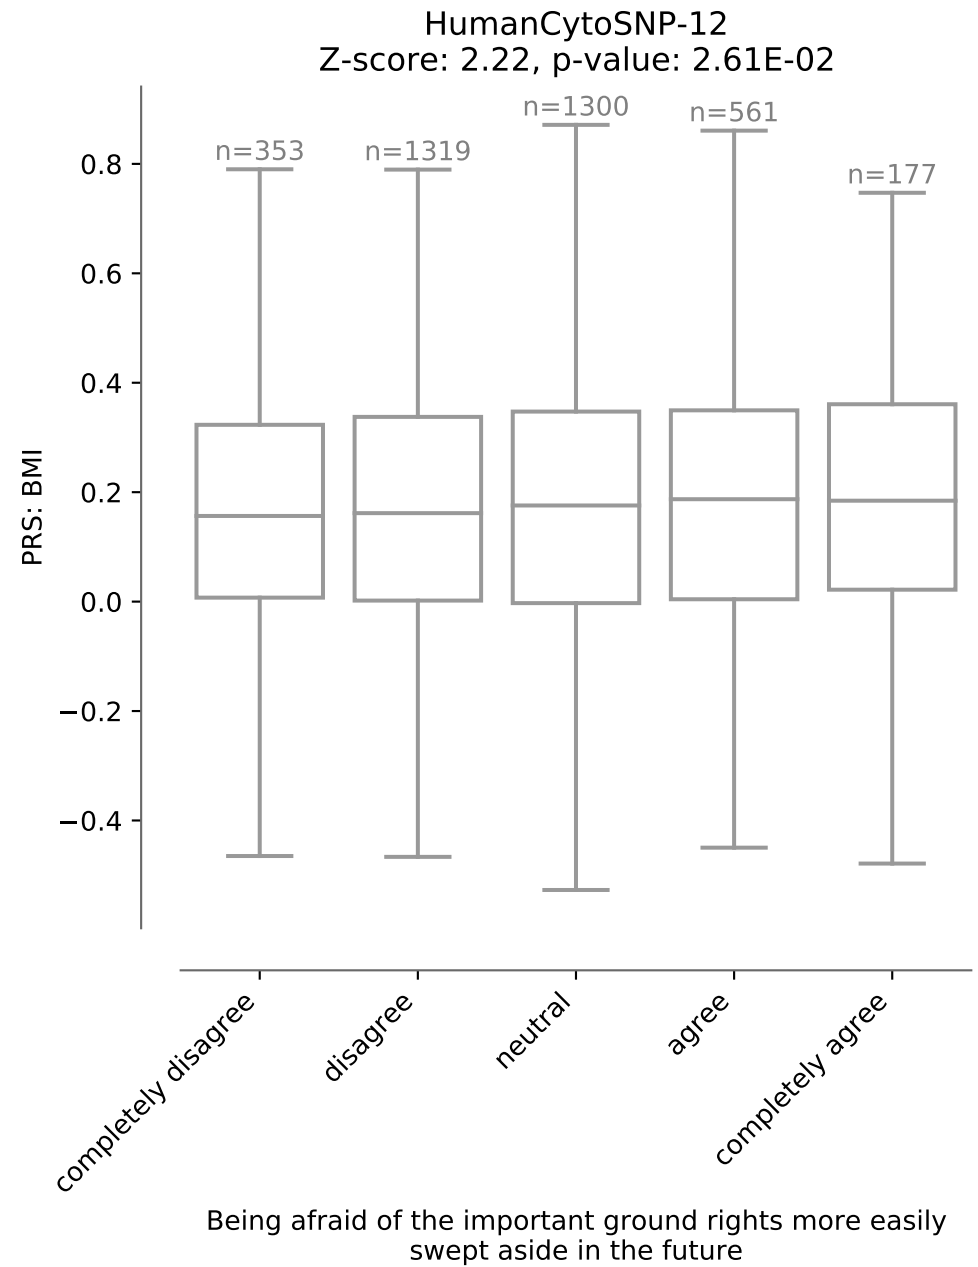

Being afraid of the important ground rights more easily swept aside in the future

PGS: Educational attainment

Meta analysis Z-score: -12.15, p-value: 5.81E-34

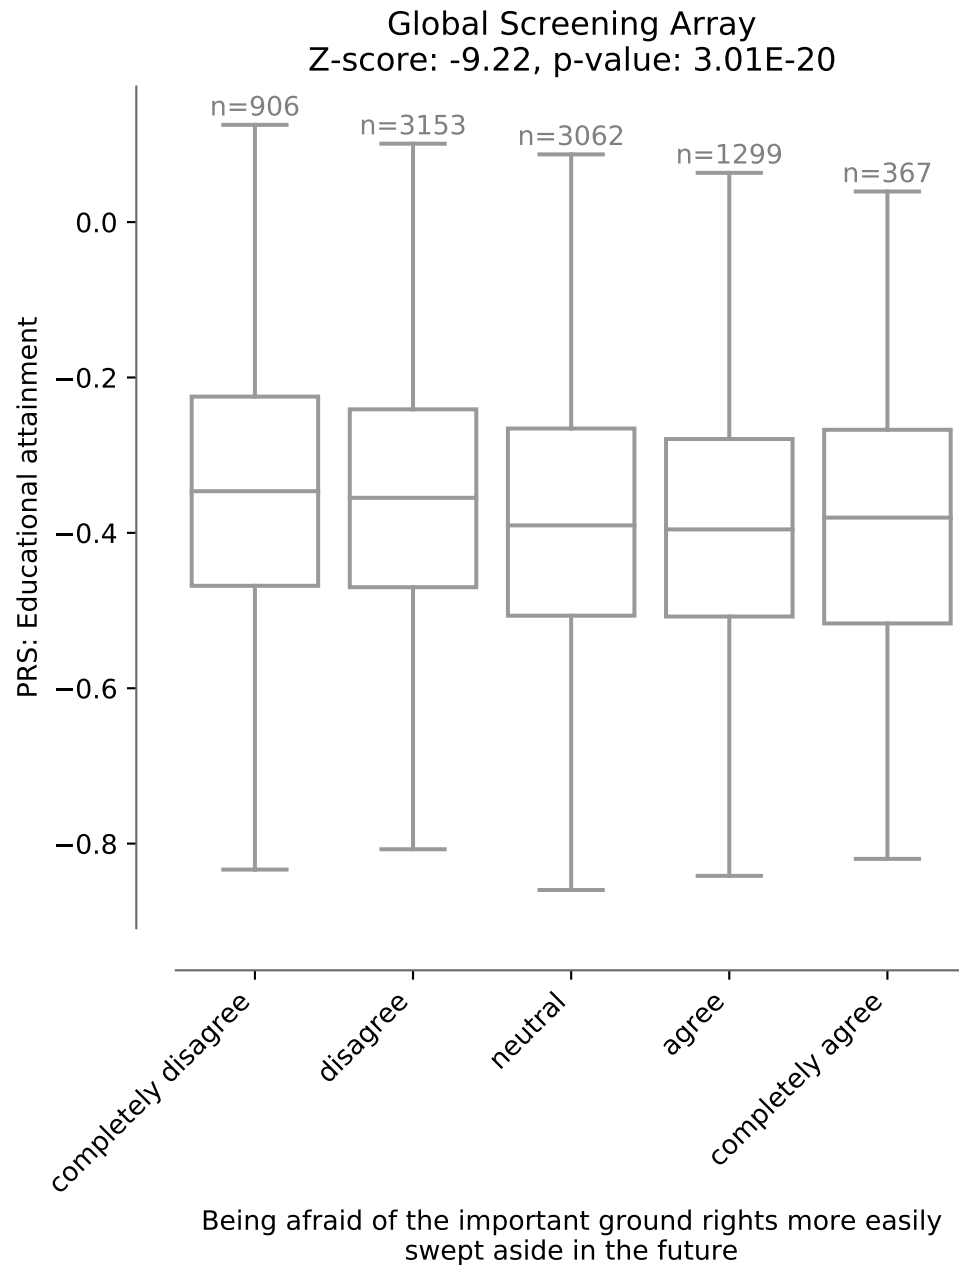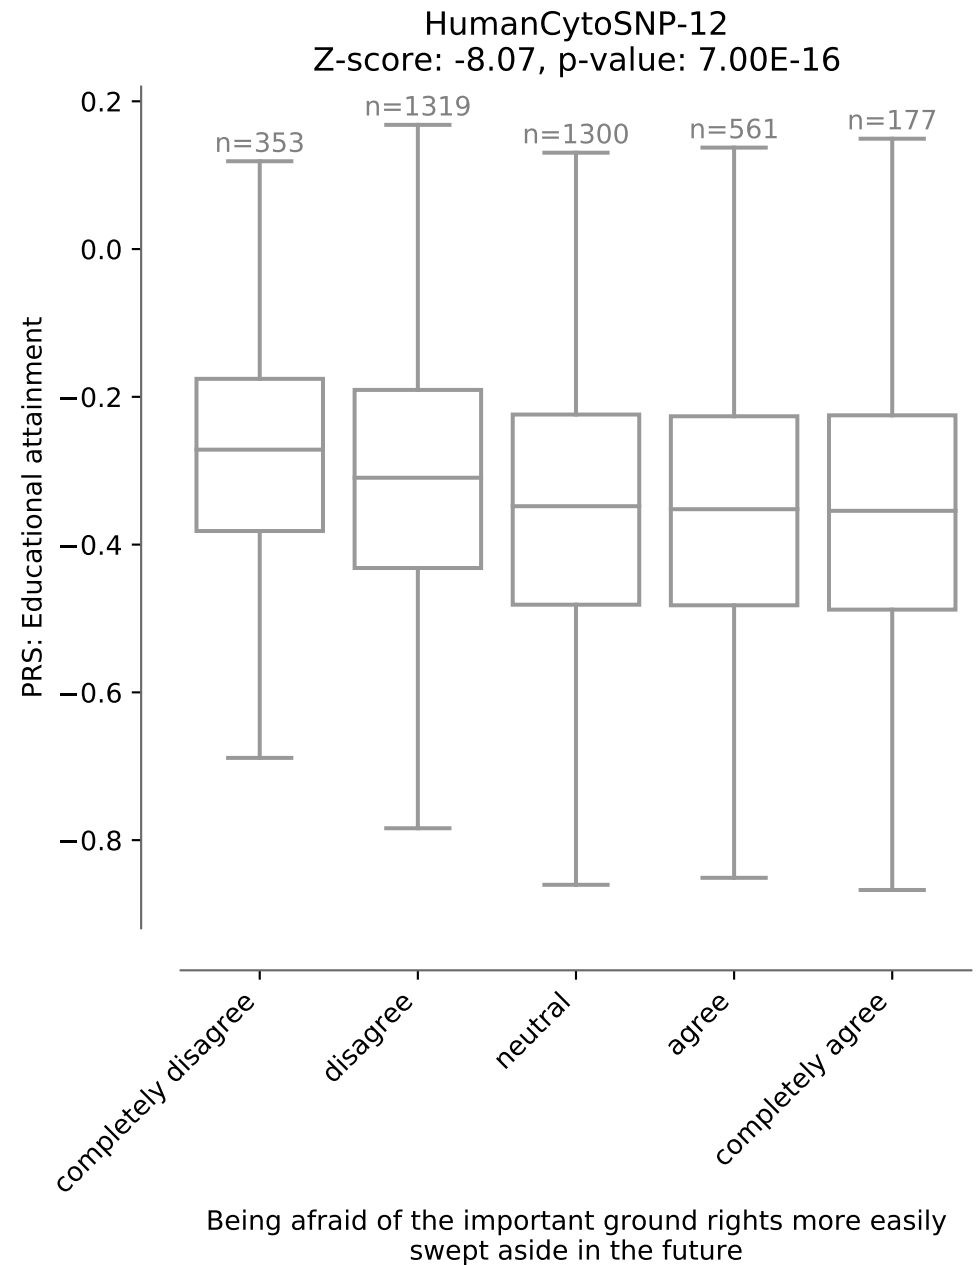



Being afraid of the important ground rights more easily swept aside in the future  
PGS: Moderate to vigorous physical activity (MVPA)  
Meta analysis Z-score: 4.73, p-value: 2.25E-06

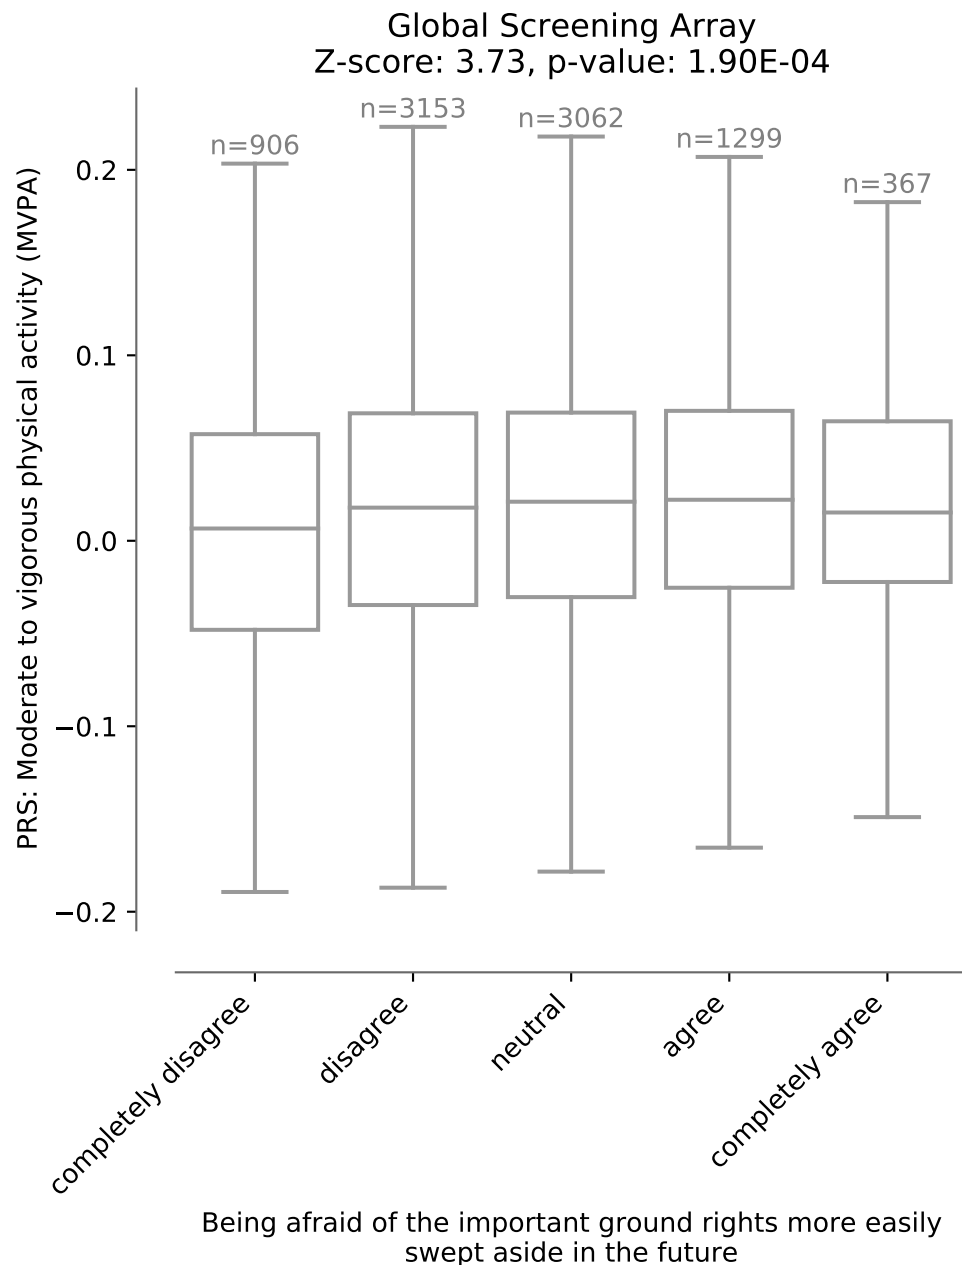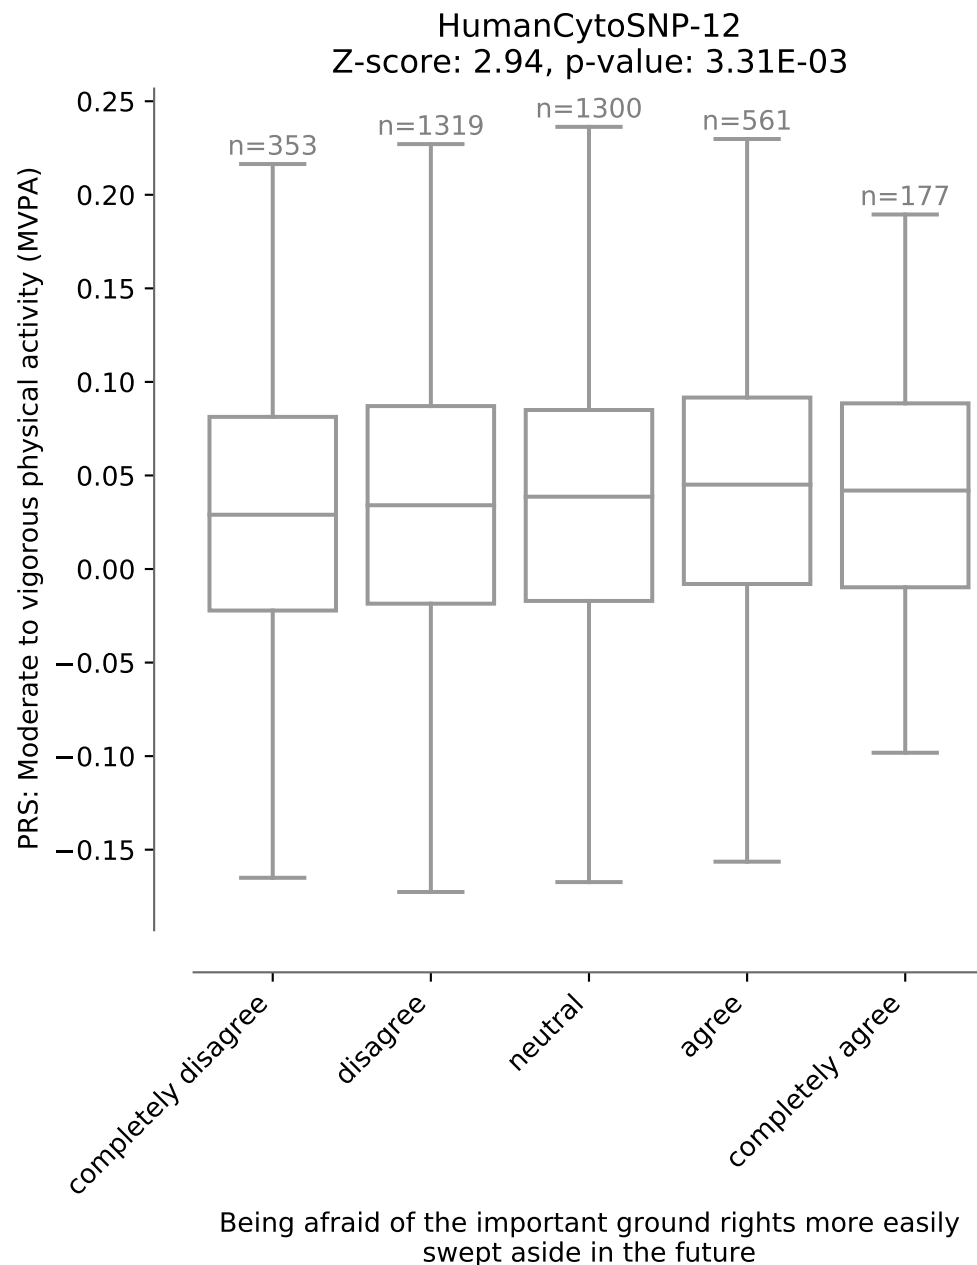

Being afraid of short-term side effects of vaccination  
PGS: Educational attainment  
Meta analysis Z-score: -9.91, p-value: 3.87E-23

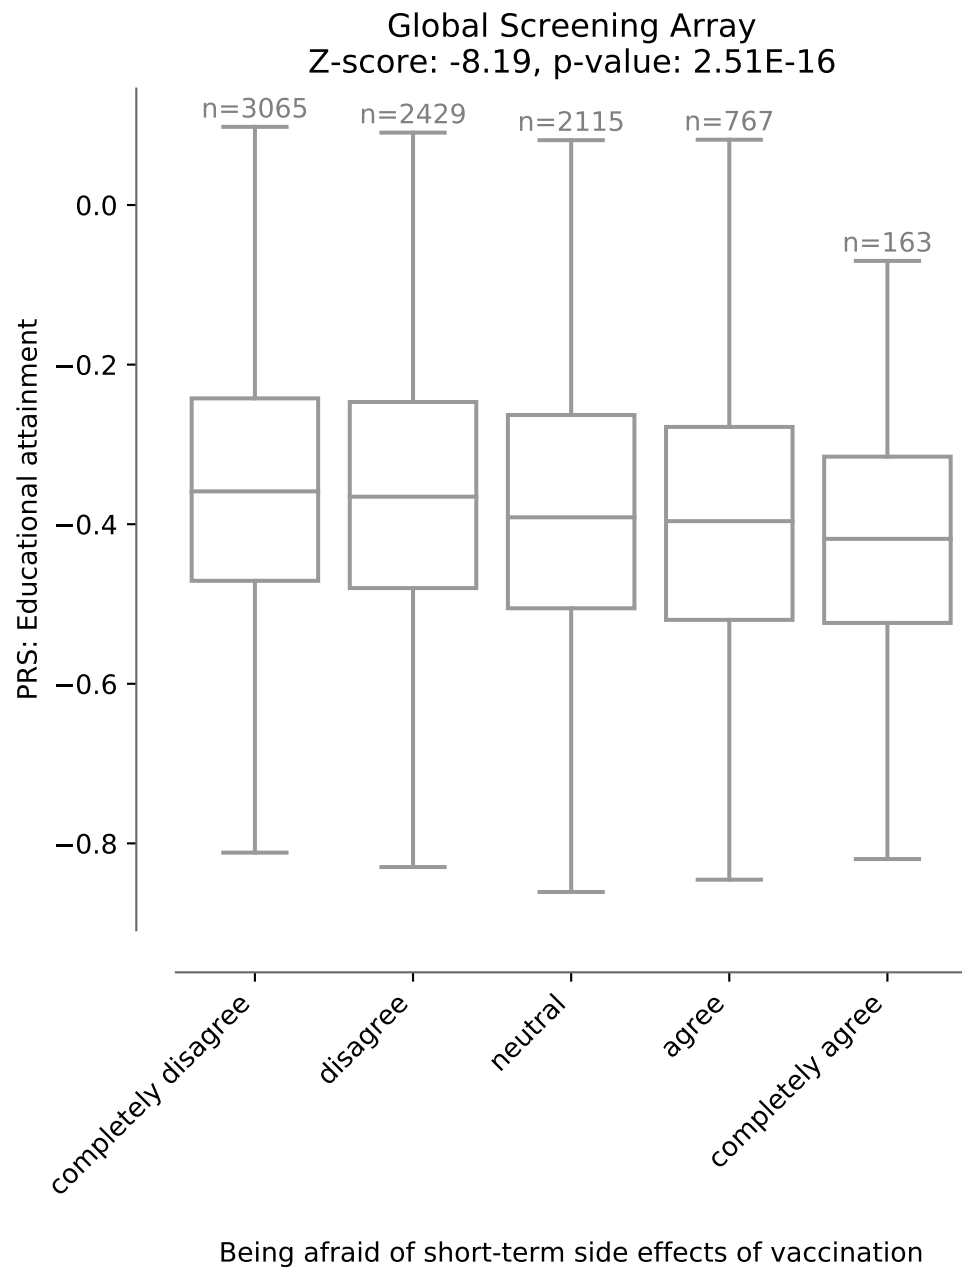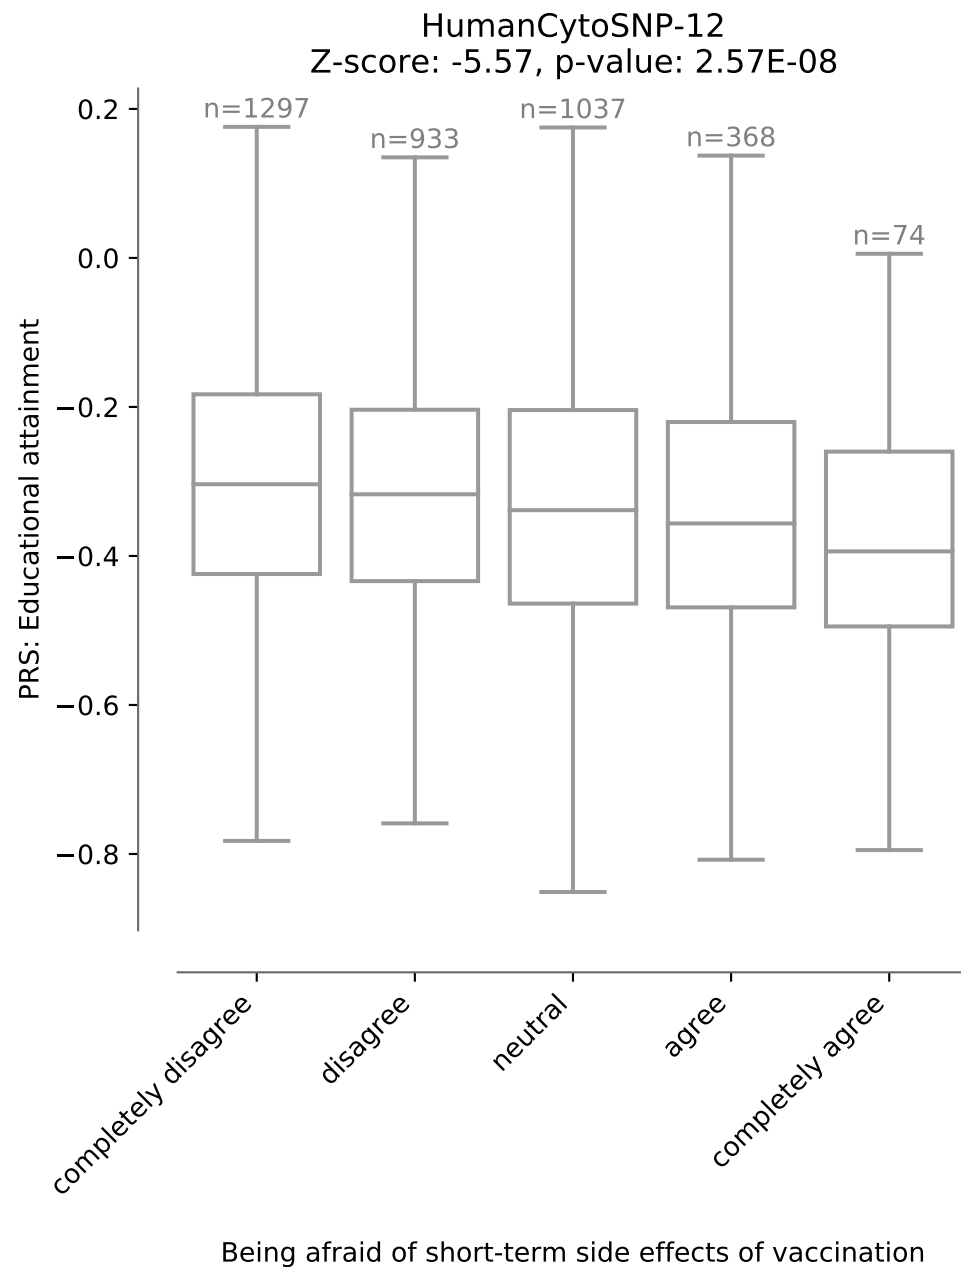

Being afraid of short-term side effects of vaccination  
PGS: Neuroticism  
Meta analysis Z-score: 6.89, p-value: 5.73E-12

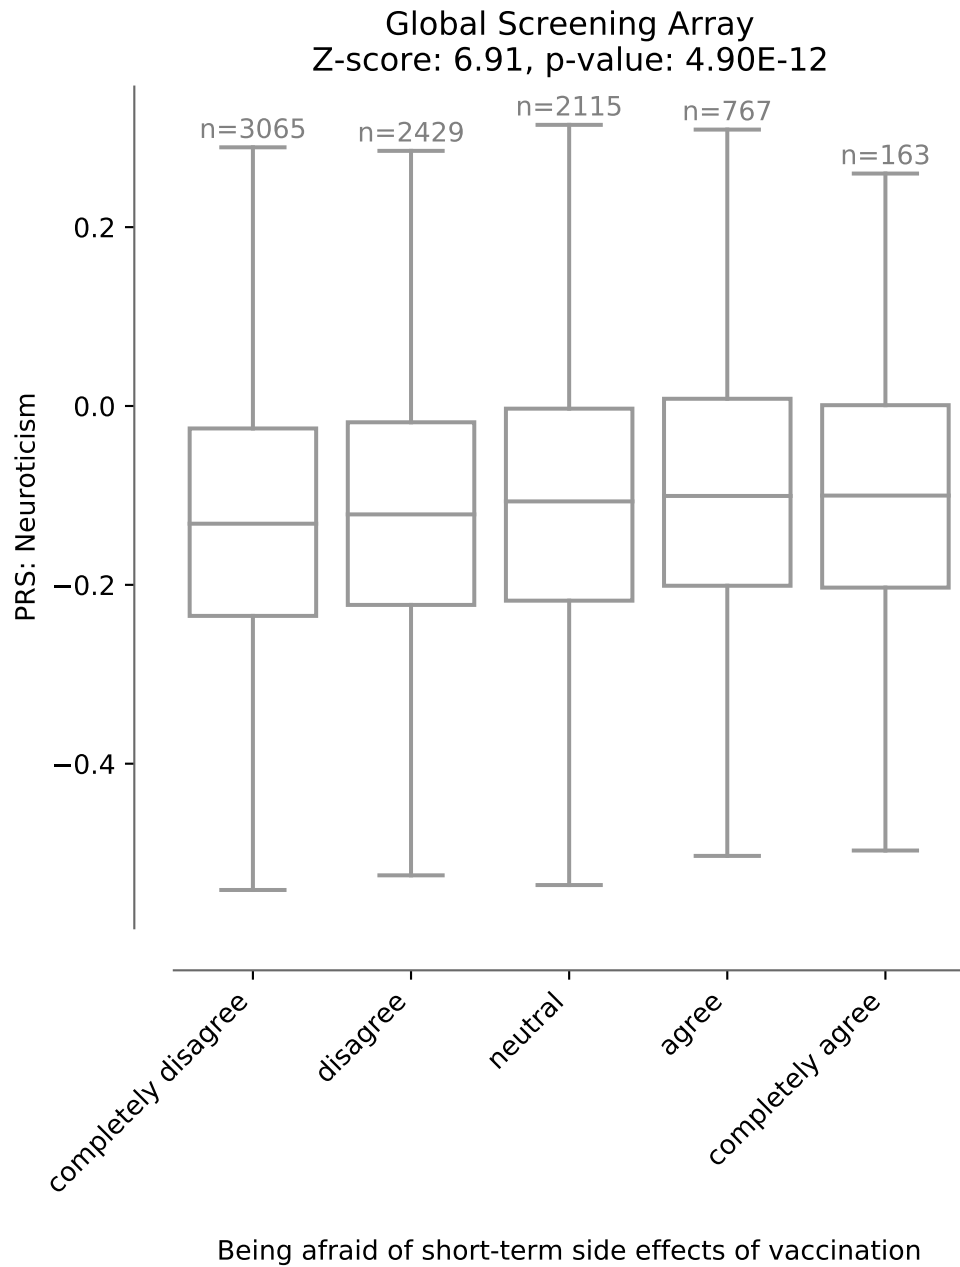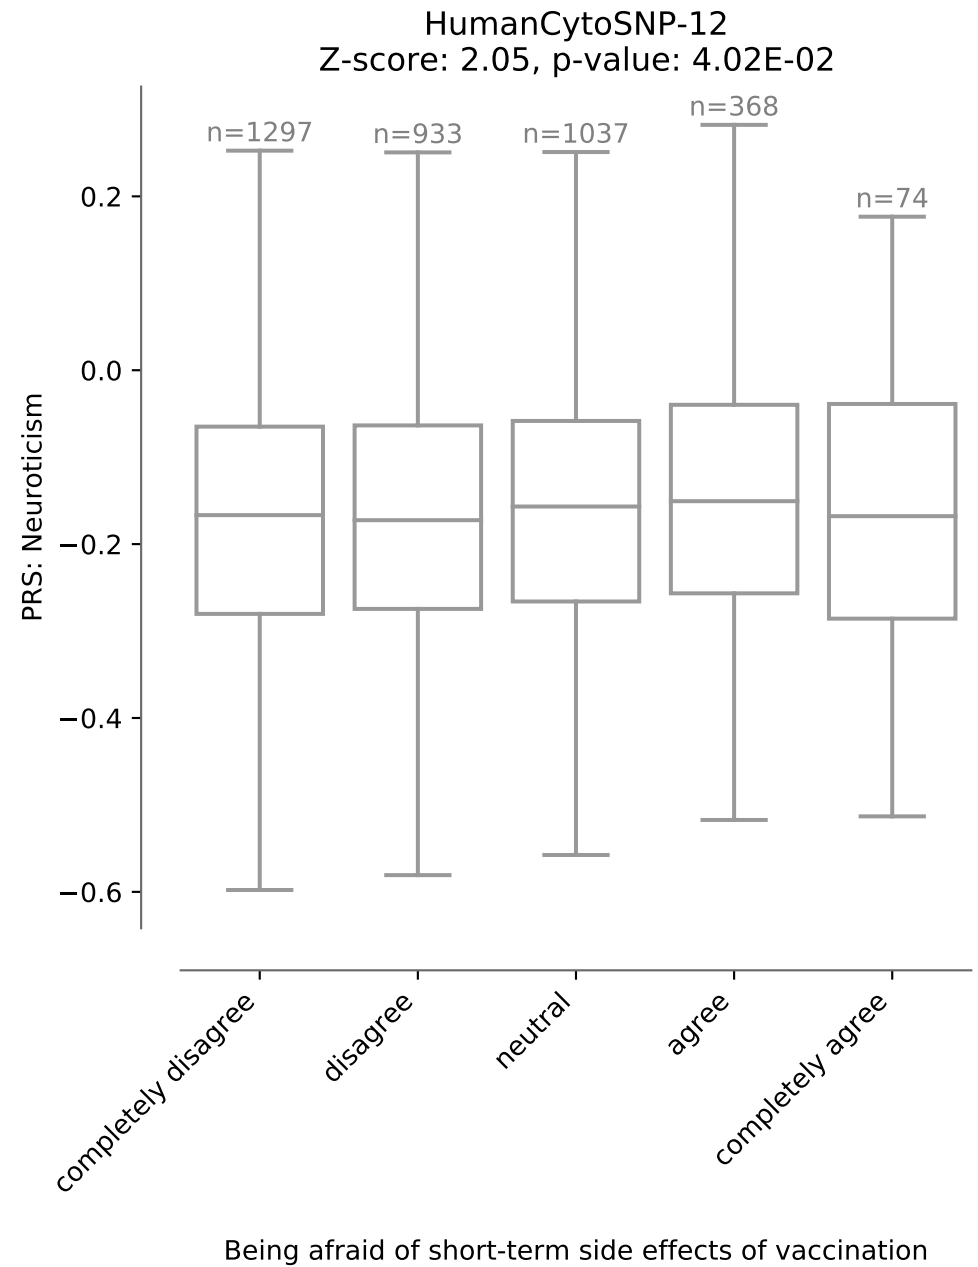

Having fear of long-term adverse drug reactions upon vaccination

PGS: Educational attainment

Meta analysis Z-score: -9.82, p-value: 8.88E-23

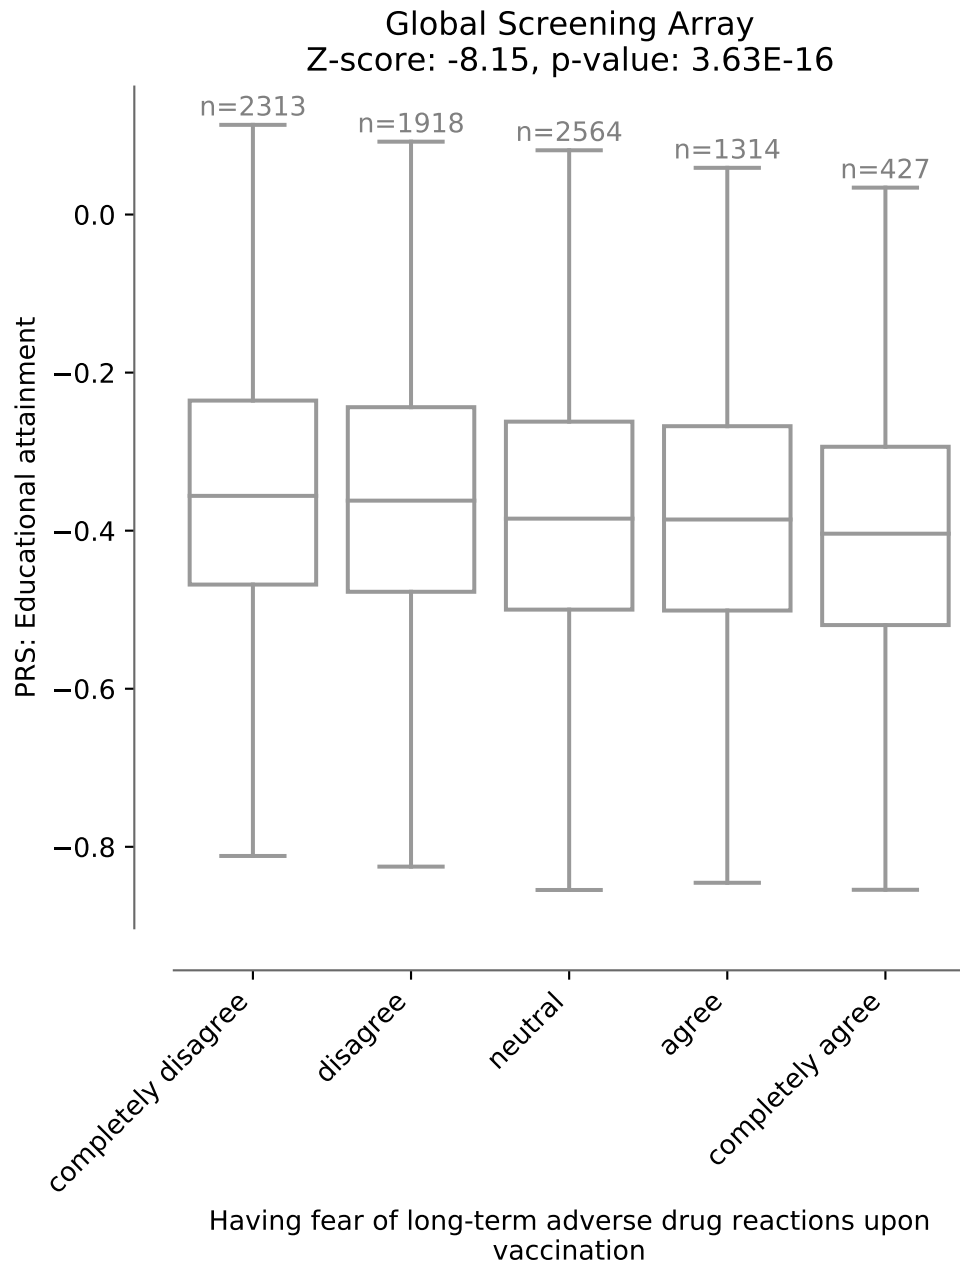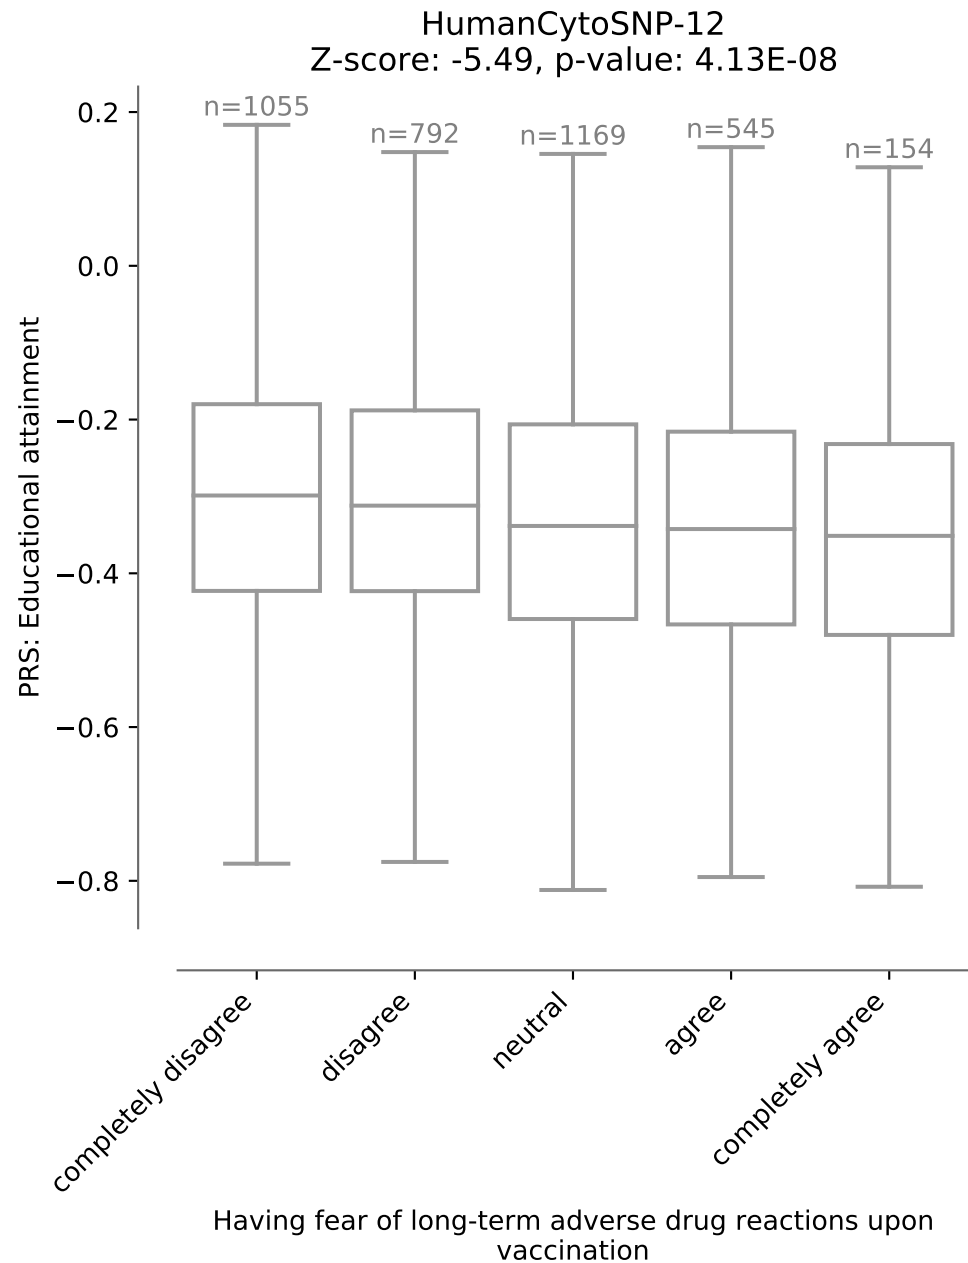

# Having fear of long-term adverse drug reactions upon vaccination

PGS: Neuroticism

Meta analysis Z-score: 5.71, p-value: 1.12E-08

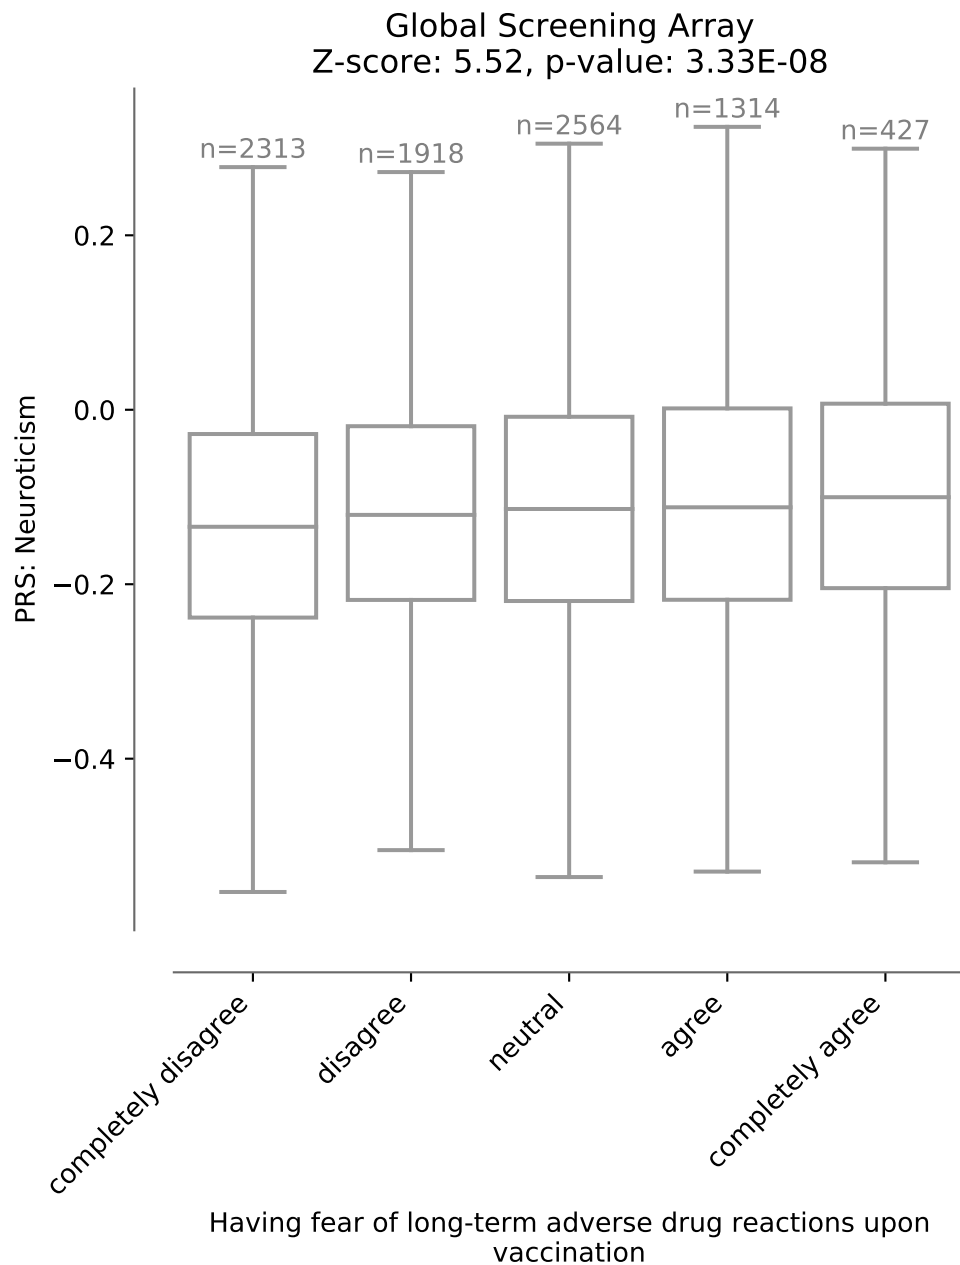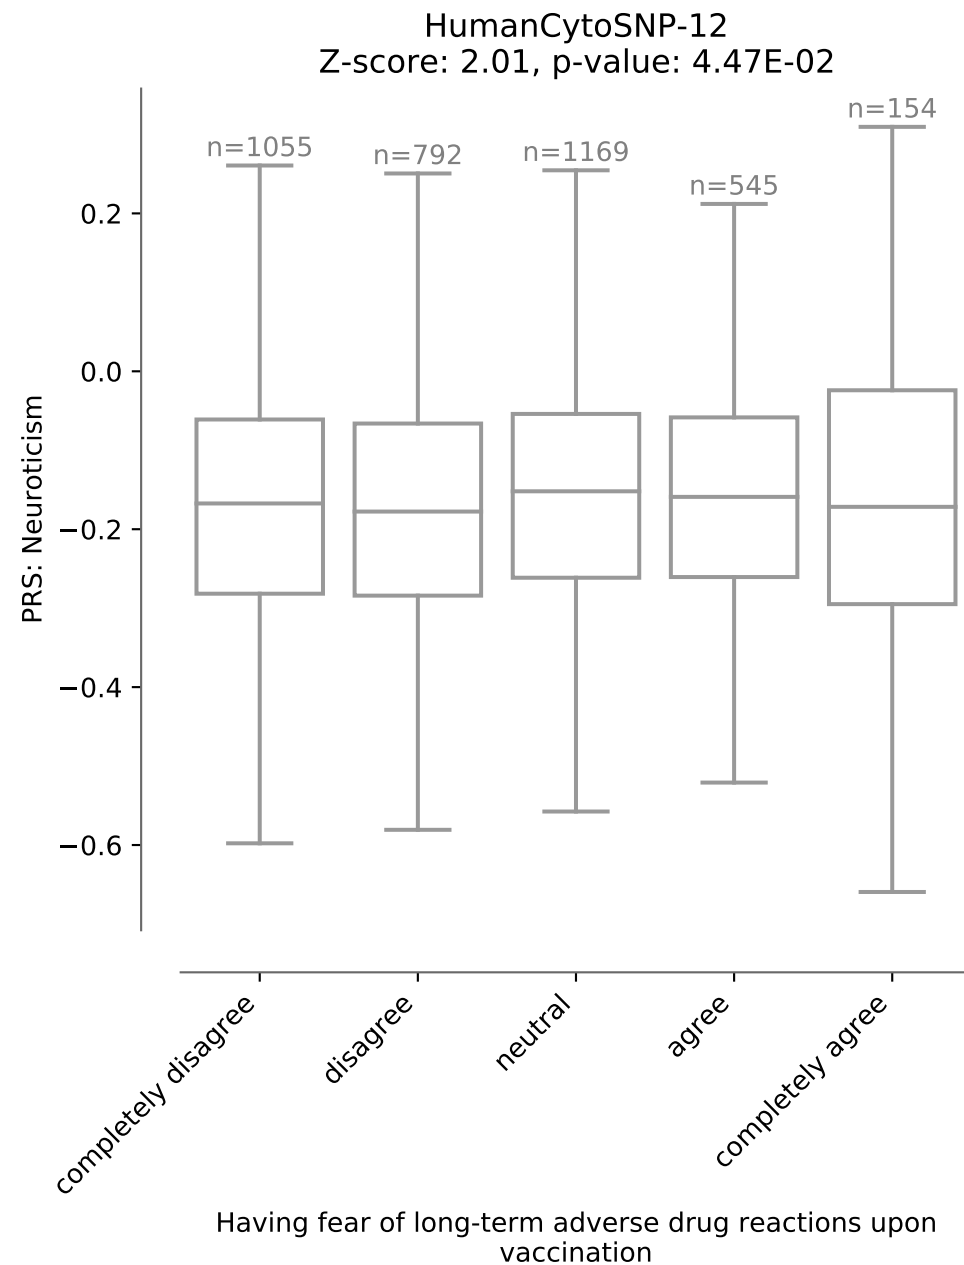

Willingness to get vaccinated if I may adhere less strict to the measures

PGS: Educational attainment

Meta analysis Z-score: 4.68, p-value: 2.93E-06

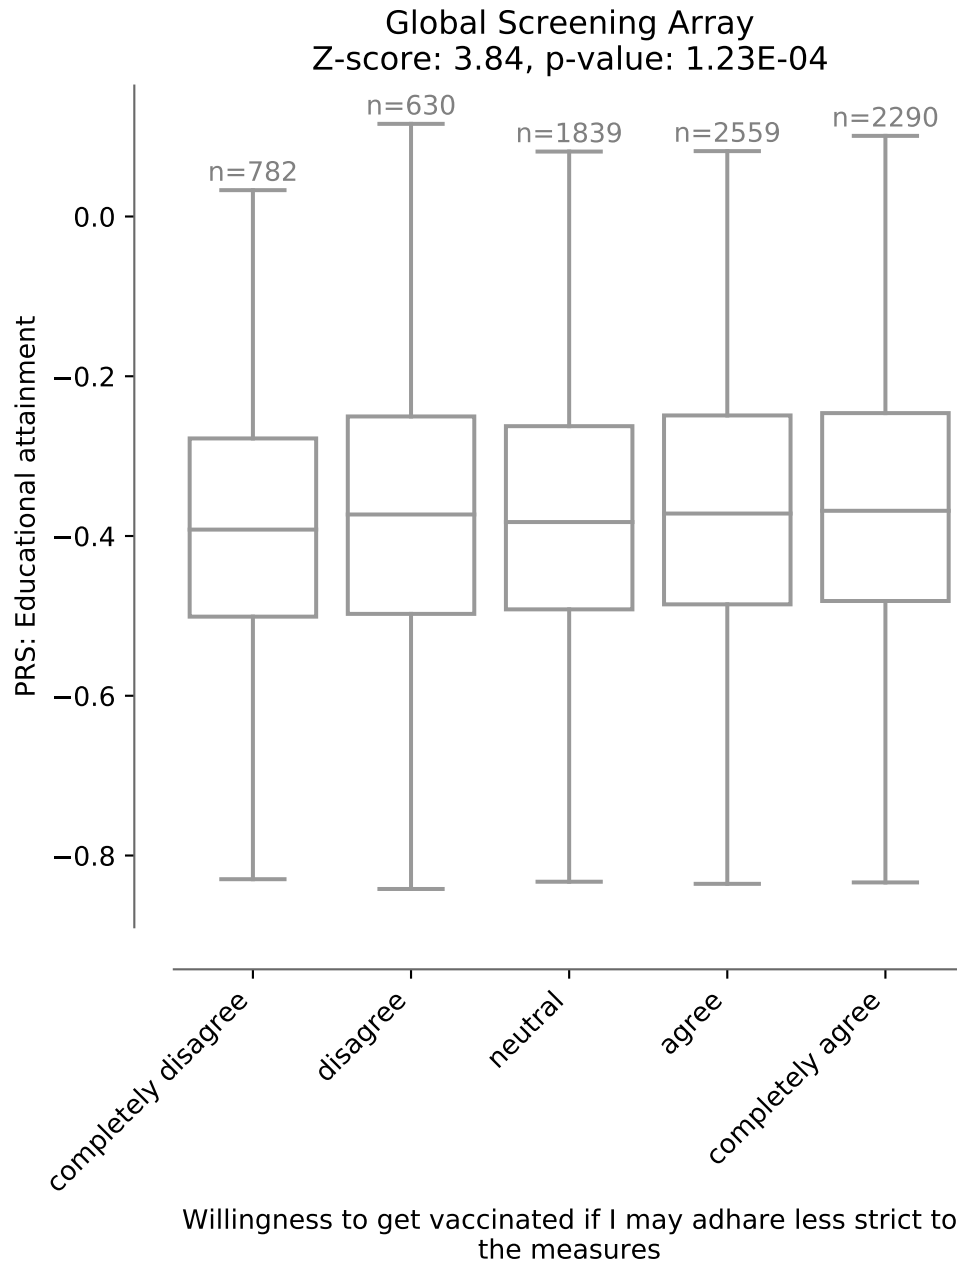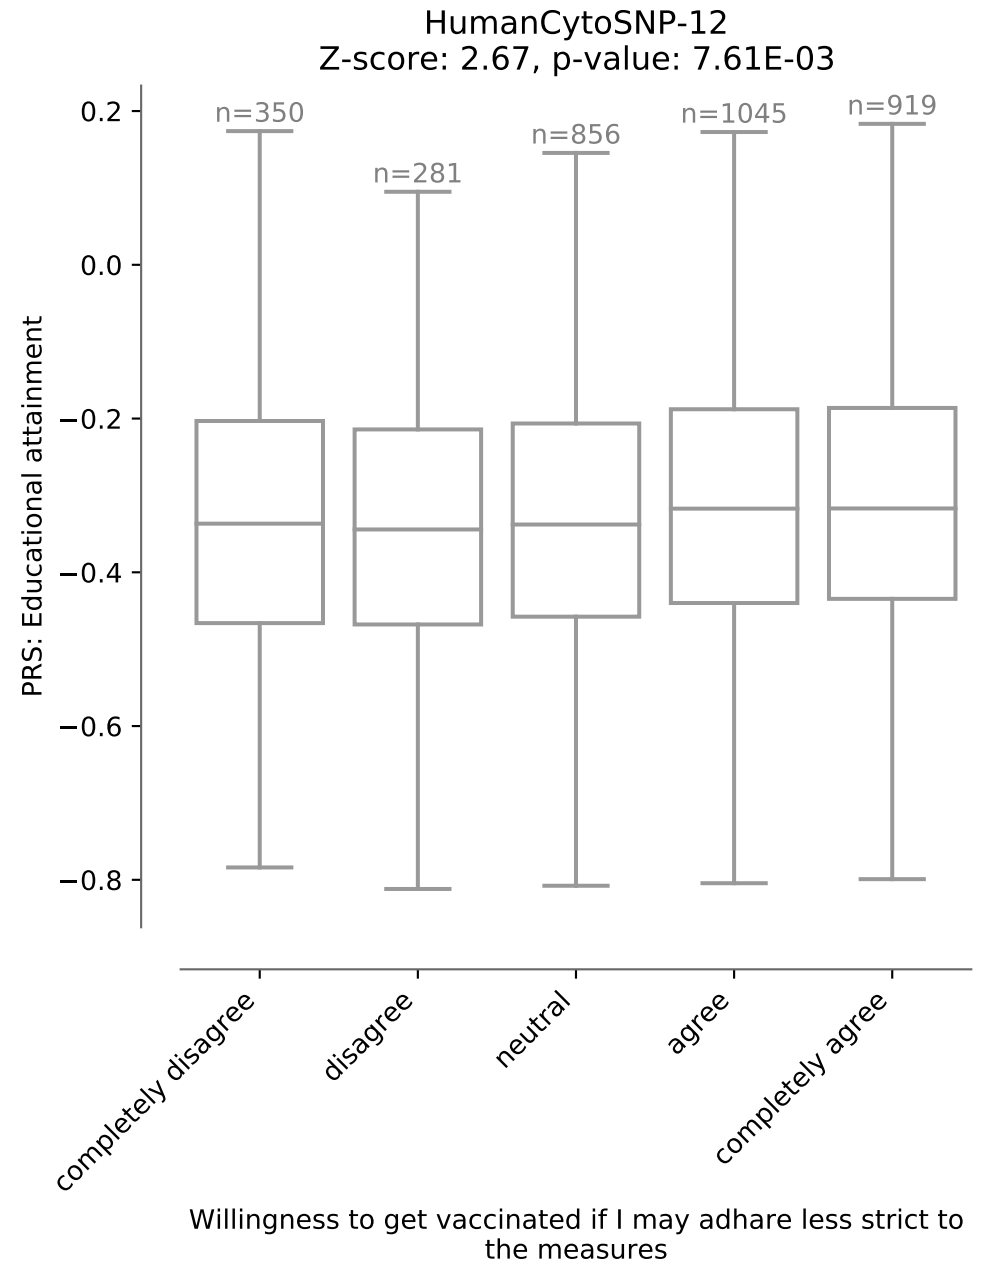

Frustrated that people do not comply with measures  
PGS: Neuroticism  
Meta analysis Z-score: 5.88, p-value: 4.05E-09

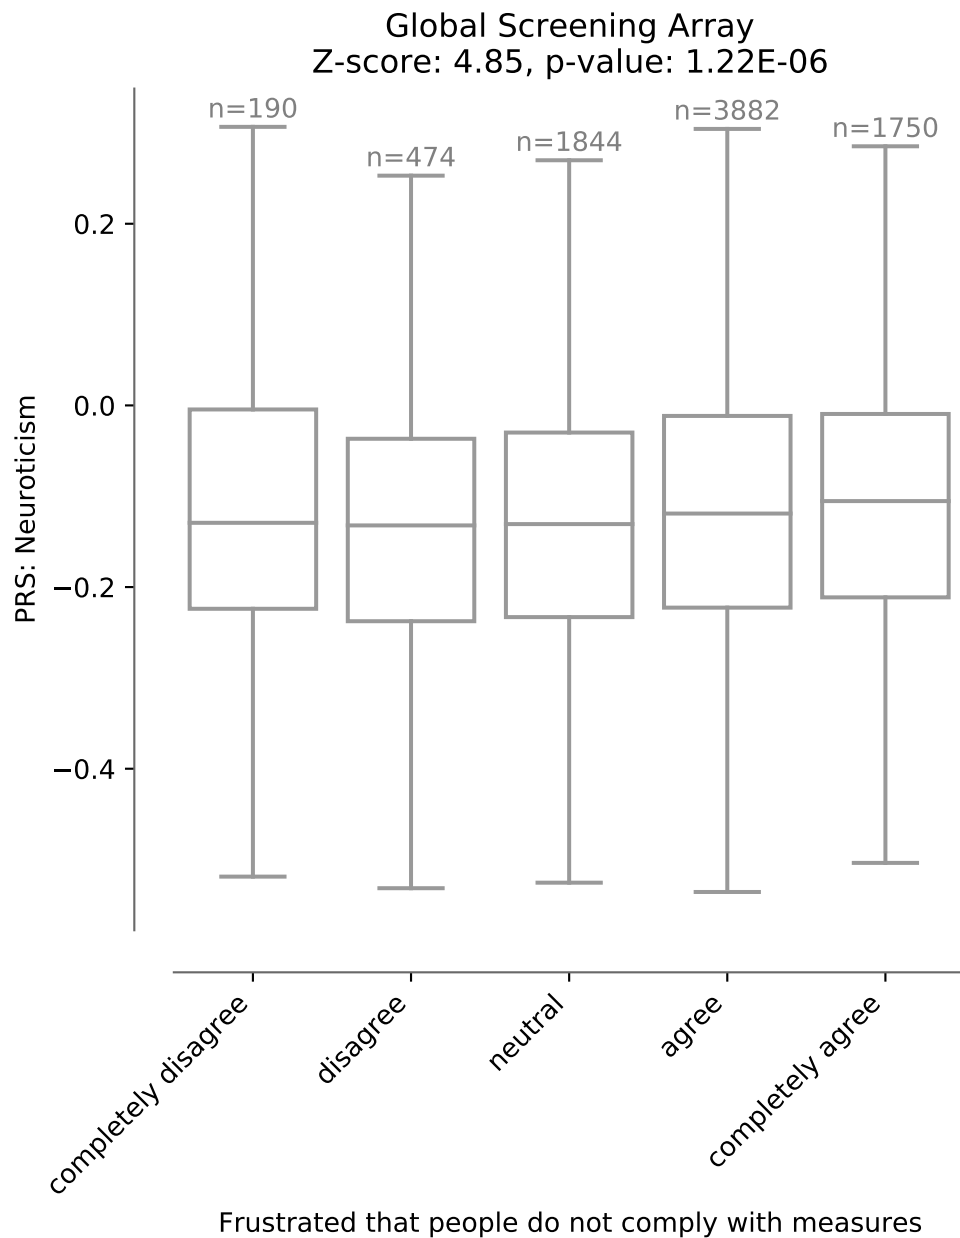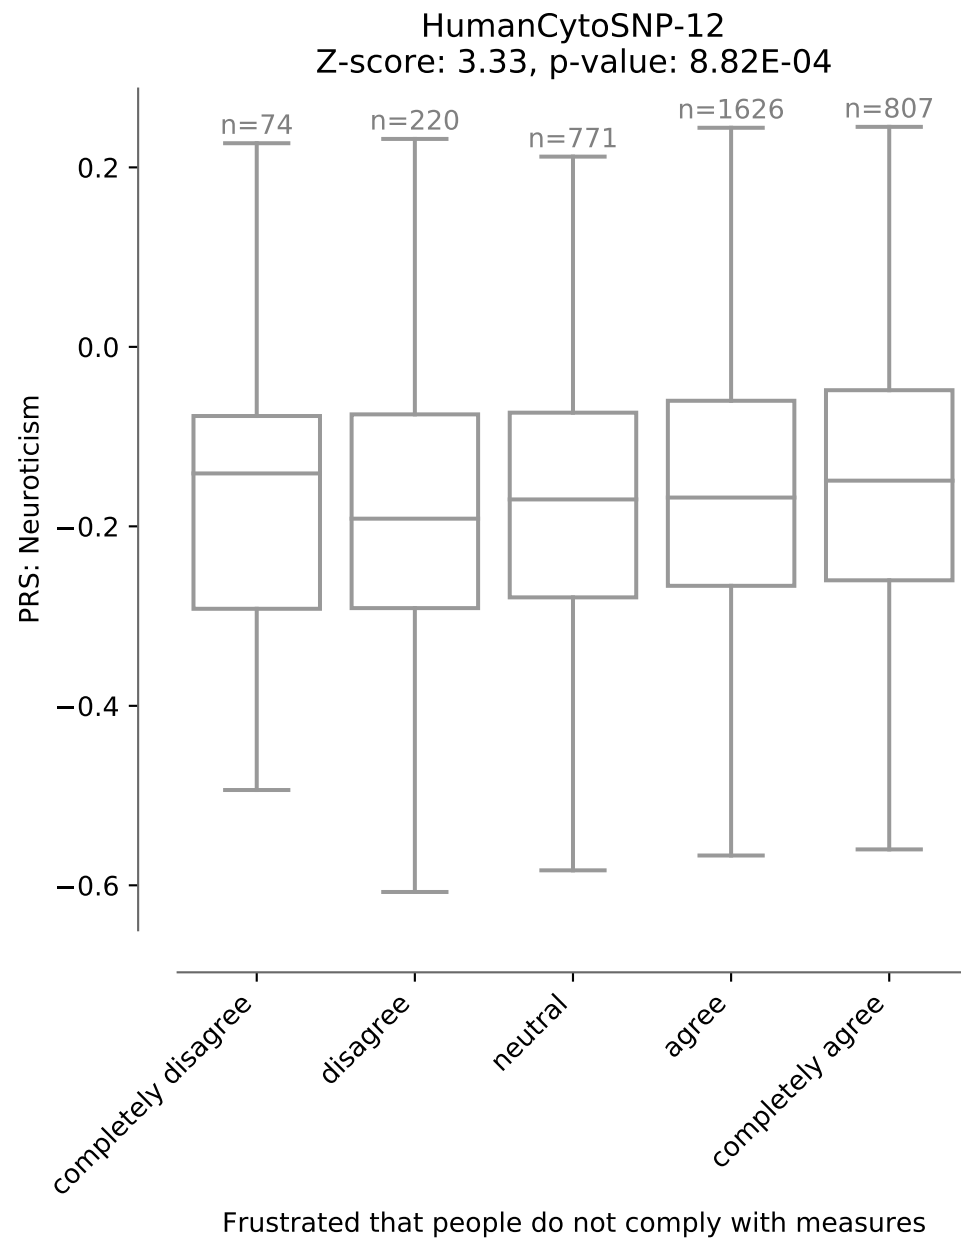

Frustrated with how things go in society  
PGS: Educational attainment  
Meta analysis Z-score: -5.19, p-value: 2.07E-07

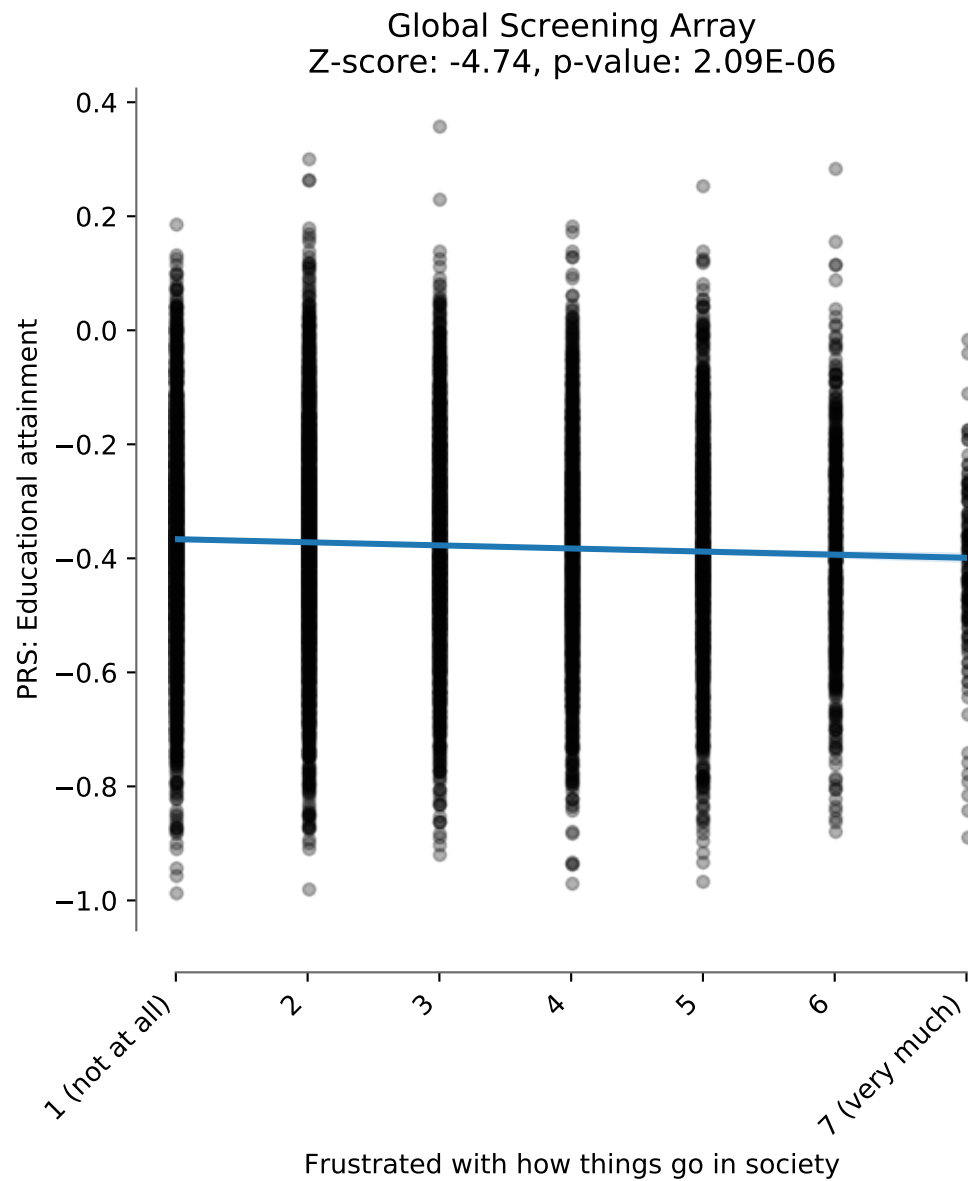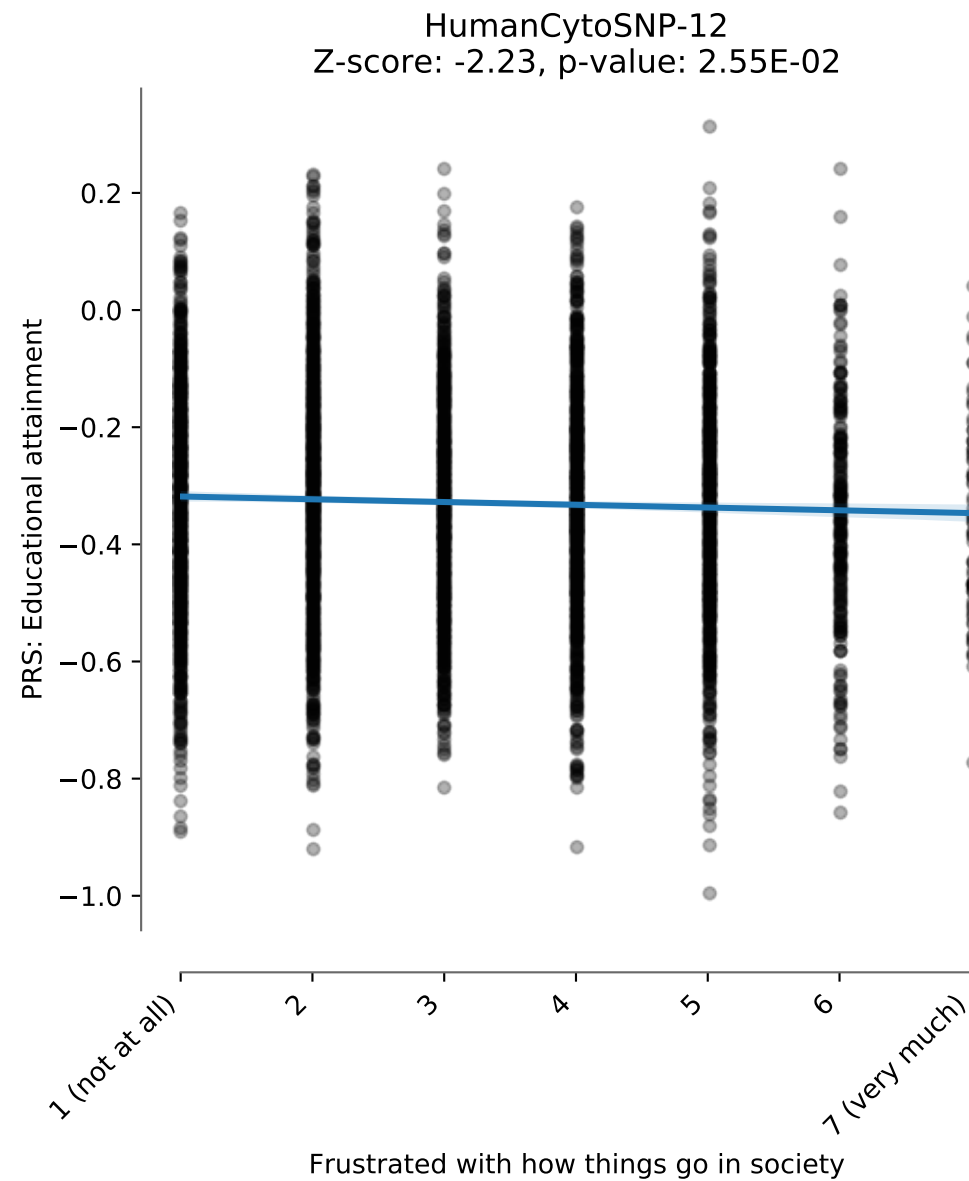



Frustrated with how things go in society  
PGS: Life satisfaction  
Meta analysis Z-score: -8.38, p-value: 5.37E-17

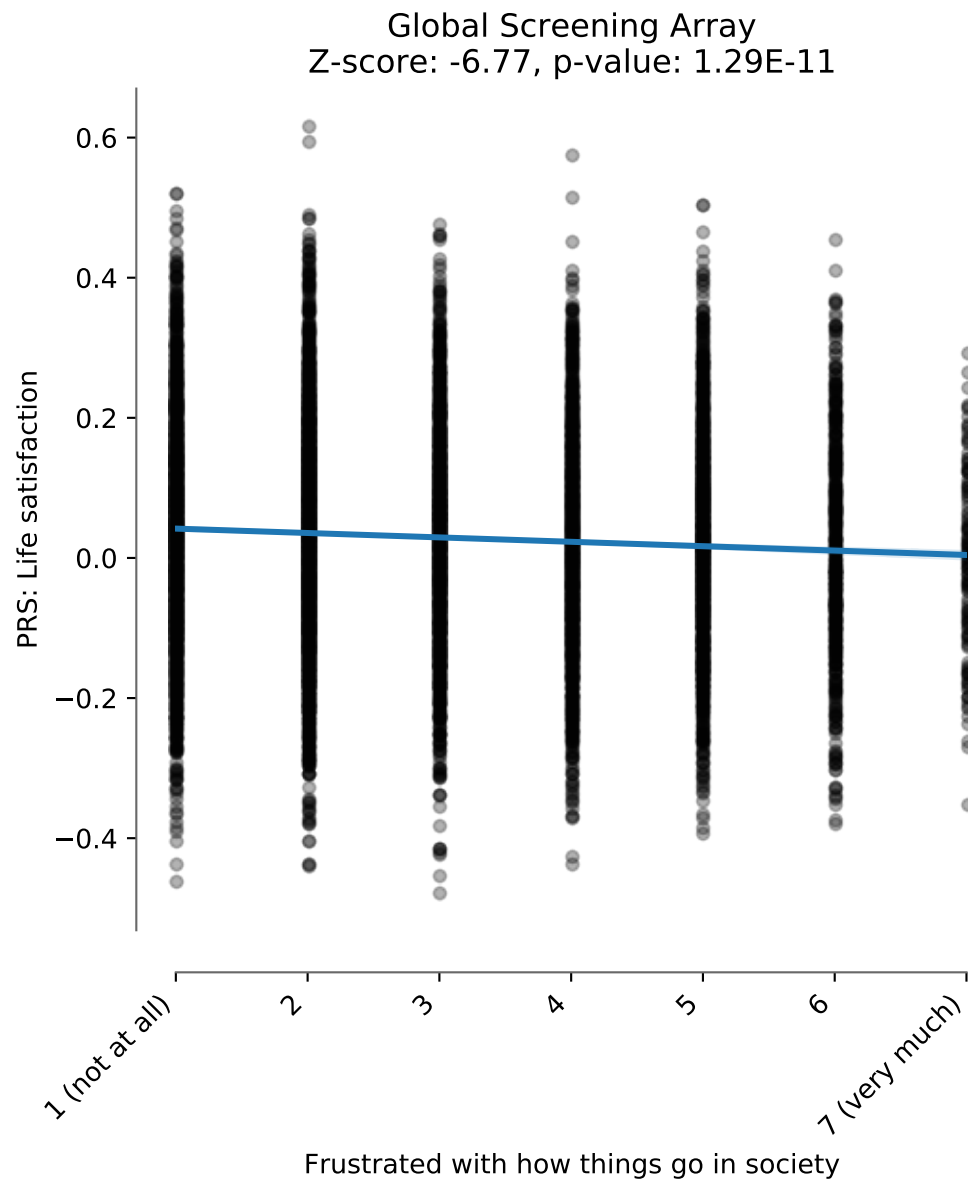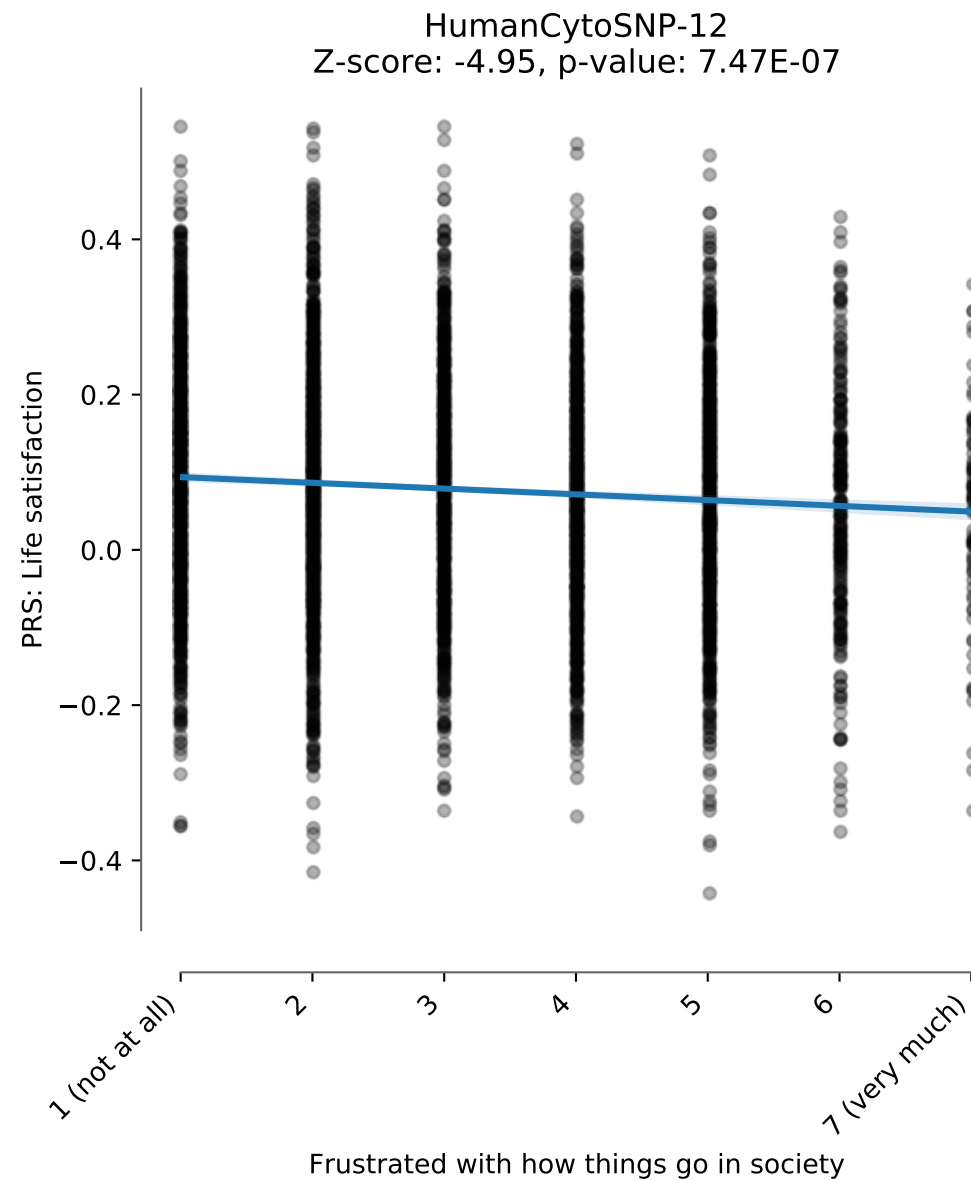

Frustrated with how things go in society  
PGS: Neuroticism  
Meta analysis Z-score: 8.51, p-value: 1.74E-17

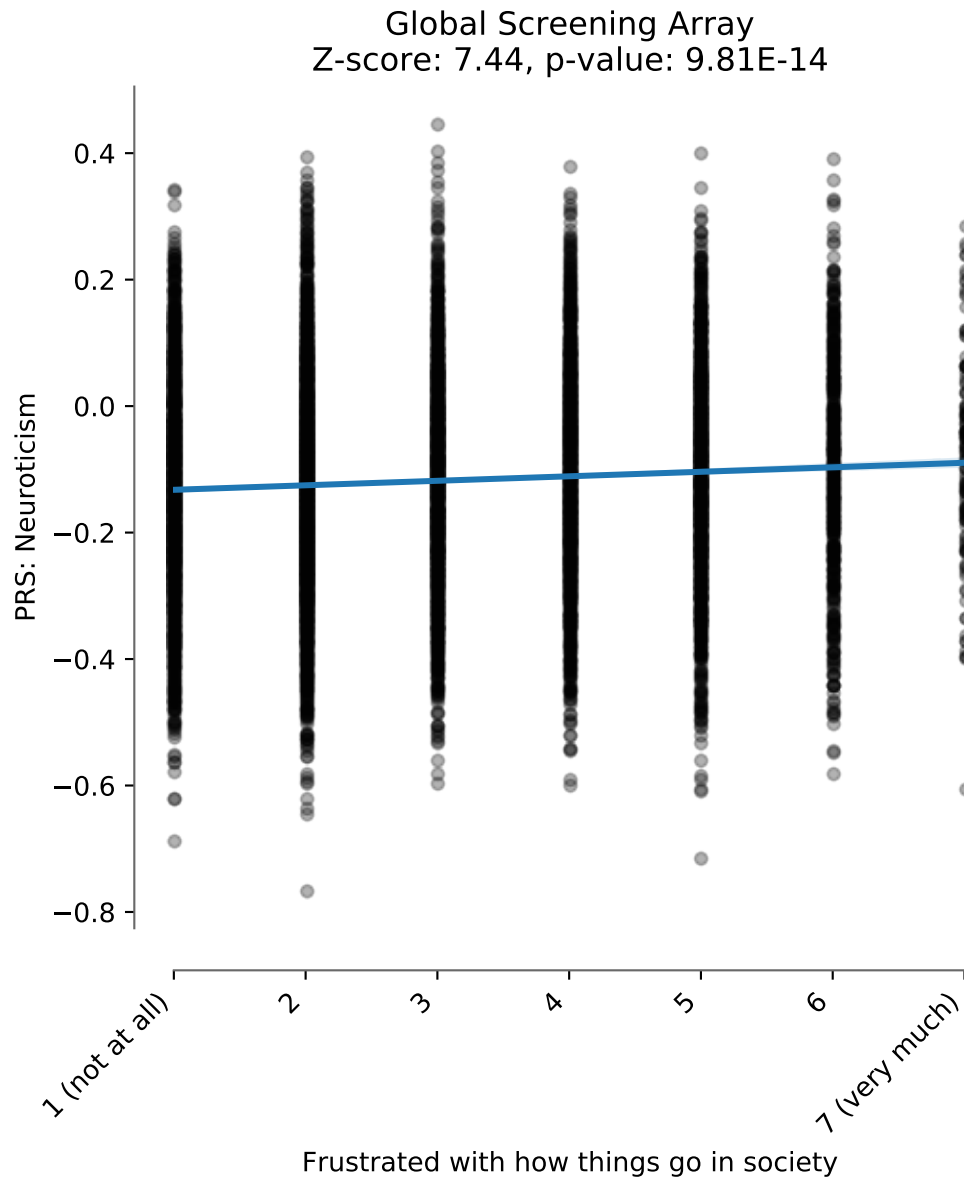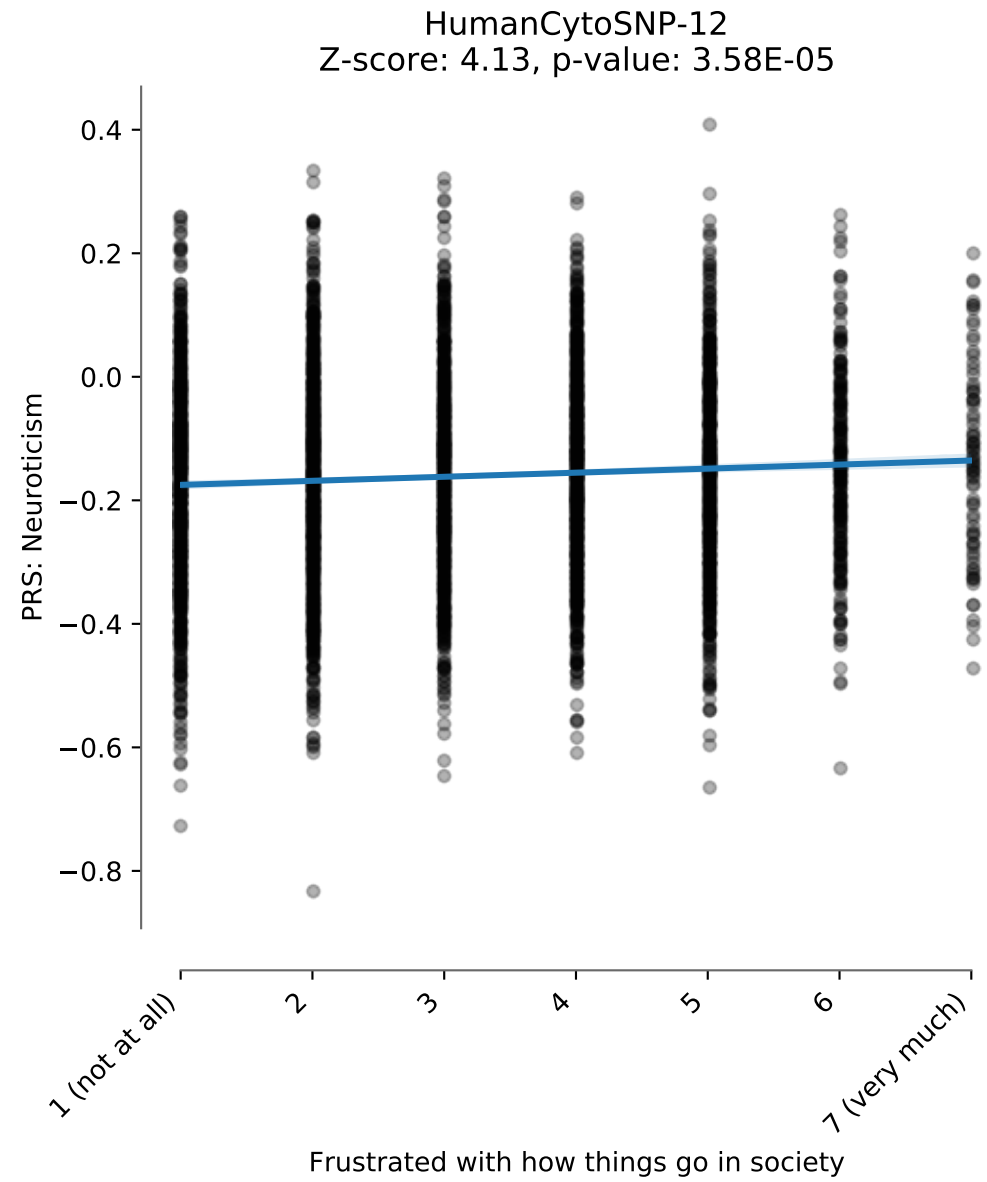

Being relieved about there being a vaccine  
PGS: Educational attainment  
Meta analysis Z-score: 4.90, p-value: 9.44E-07

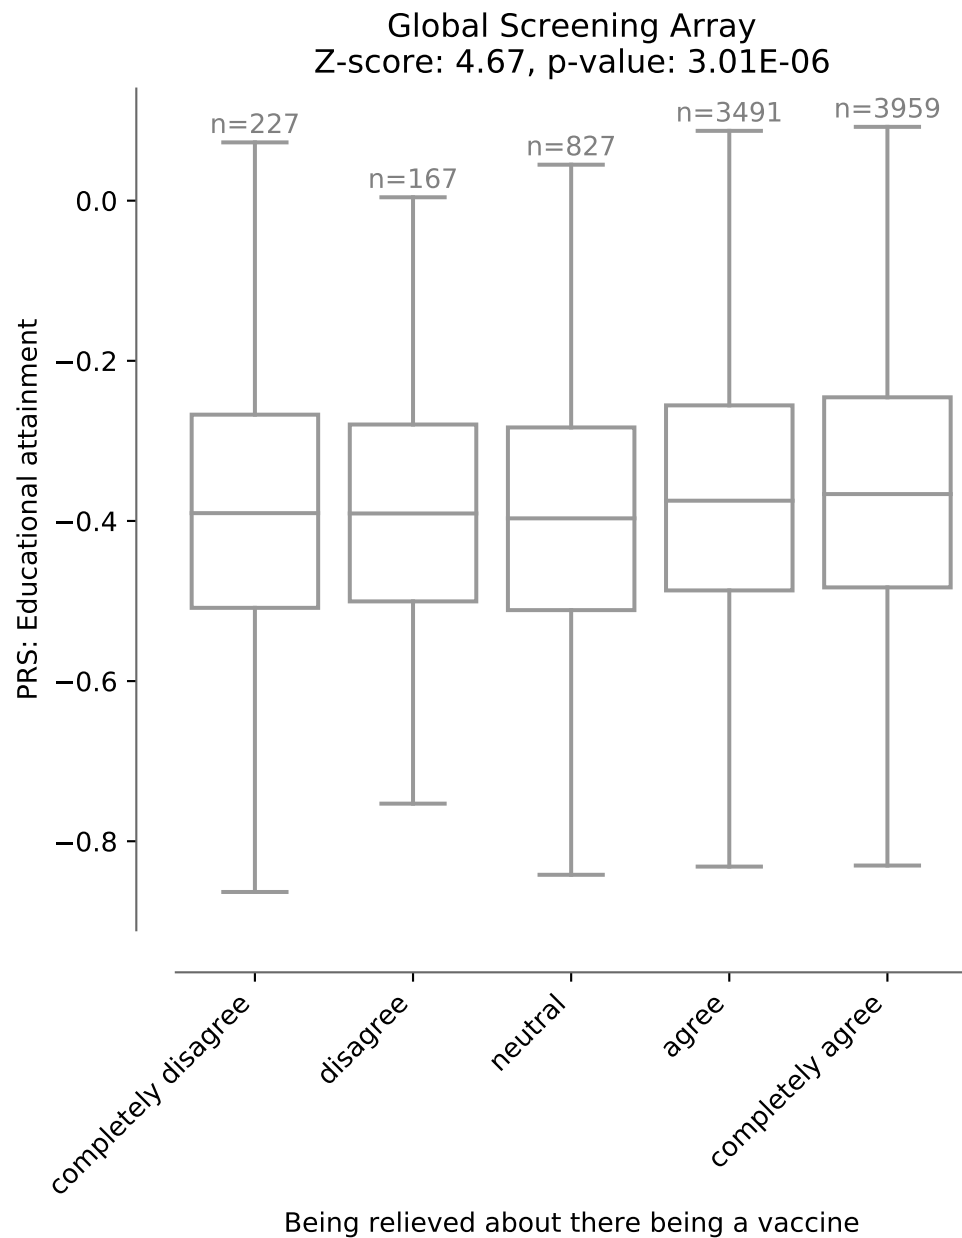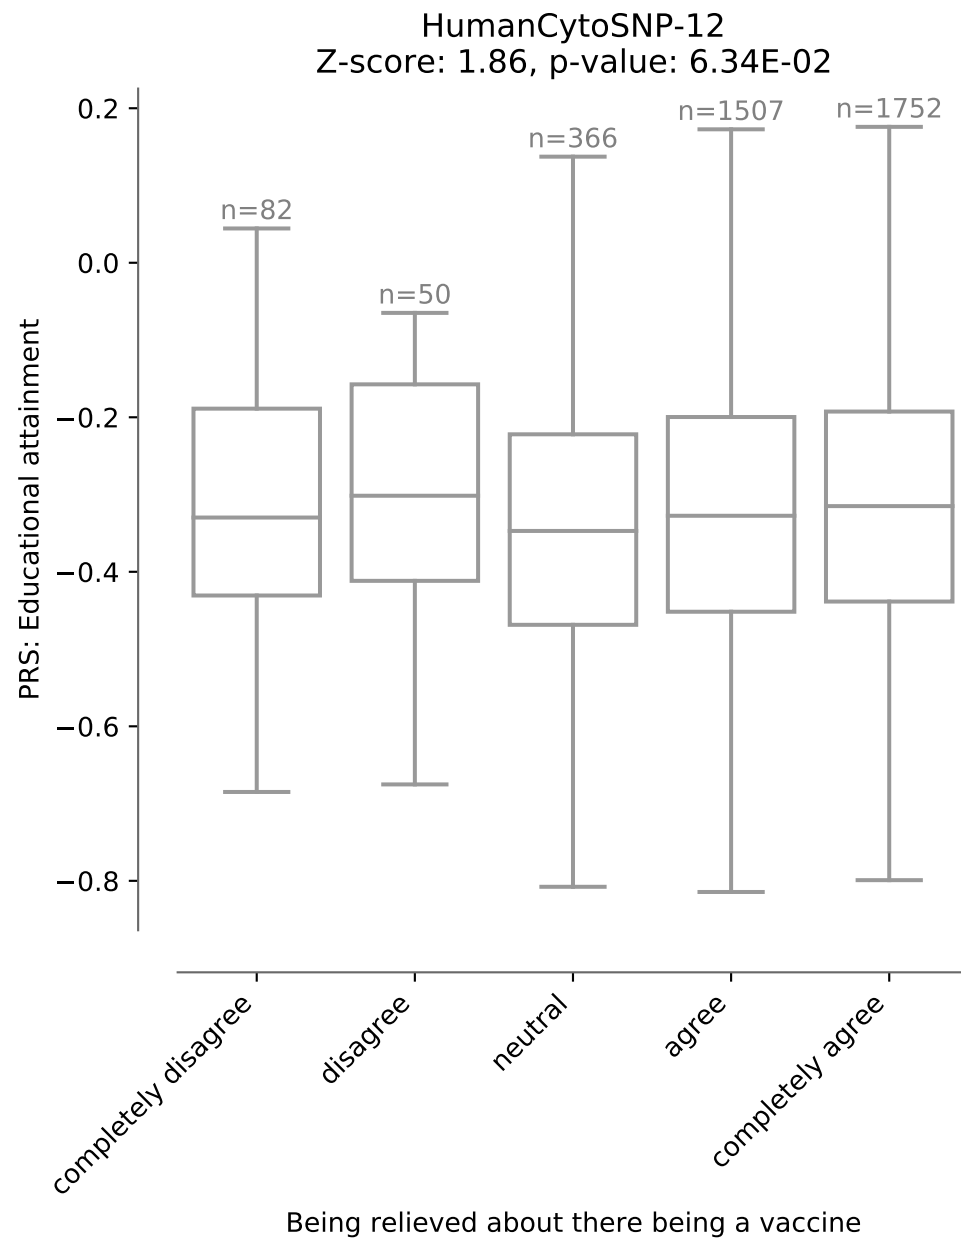

Finding that more people die indirectly following the corona crisis than directly by COVID-19

PGS: Educational attainment

Meta analysis Z-score: -8.88, p-value: 6.84E-19

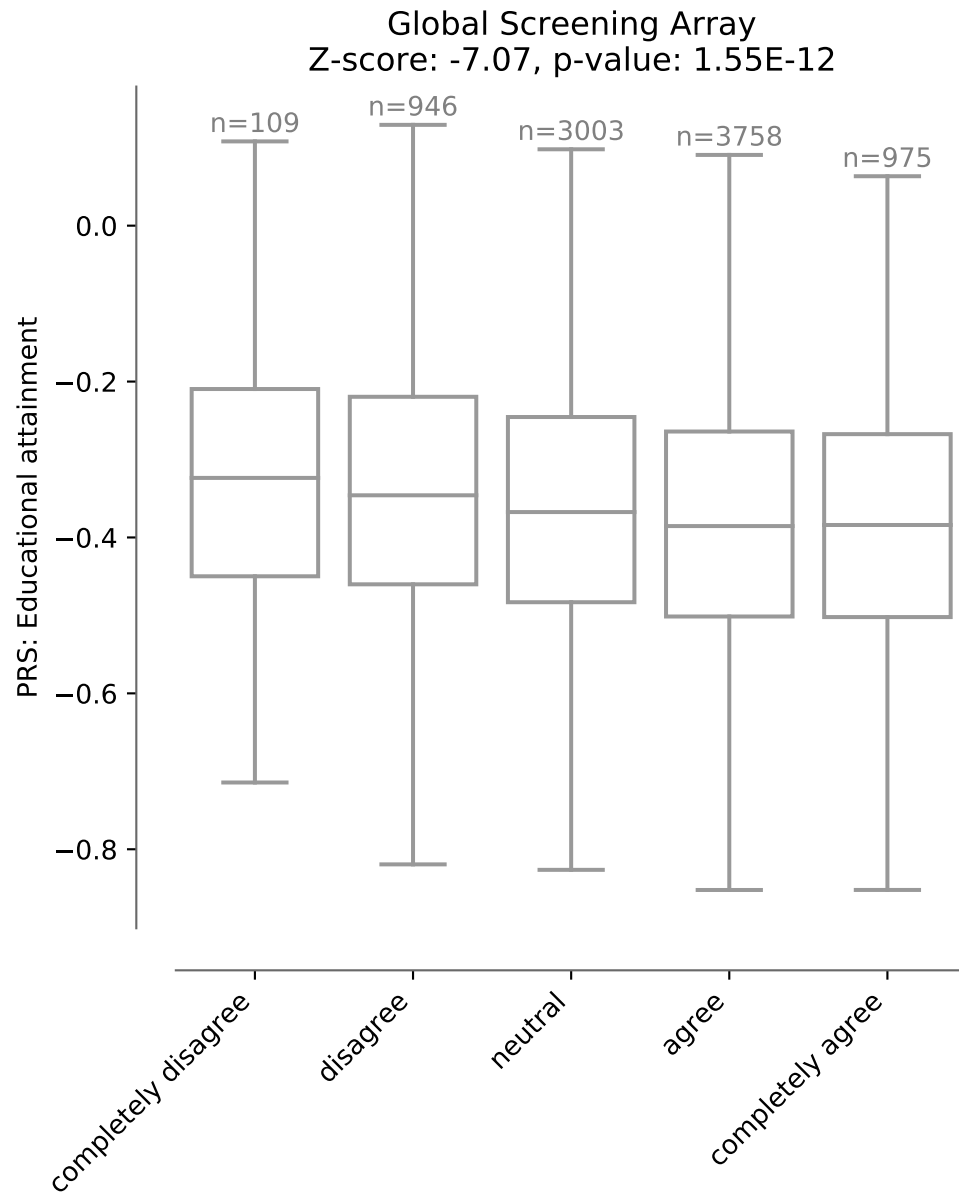

Finding that more people die indirectly following the corona crisis than directly by COVID-19

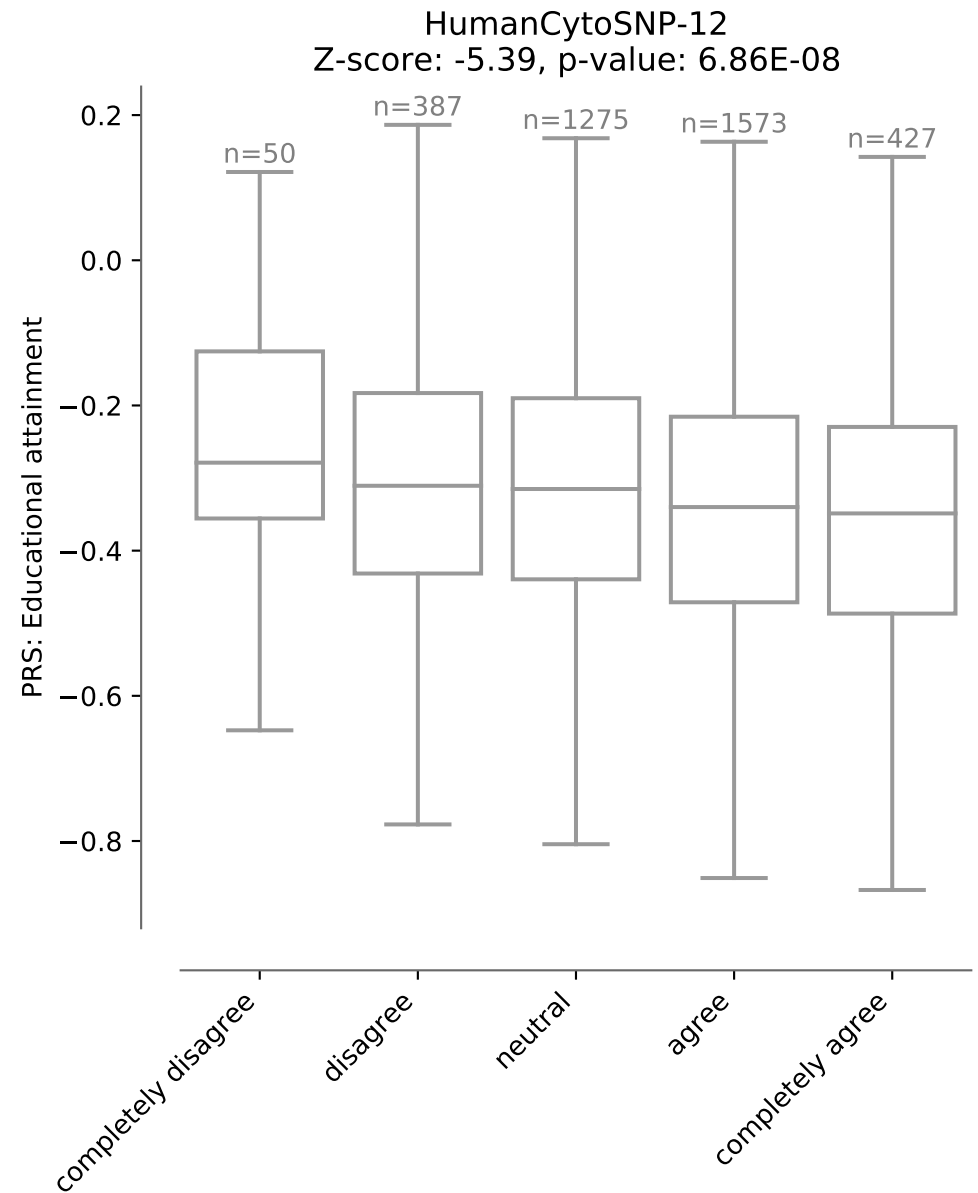

Finding that more people die indirectly following the corona crisis than directly by COVID-19

Expecting a resurgence of the coronavirus because of christmas holidays

PGS: Educational attainment

Meta analysis Z-score: 4.59, p-value: 4.45E-06

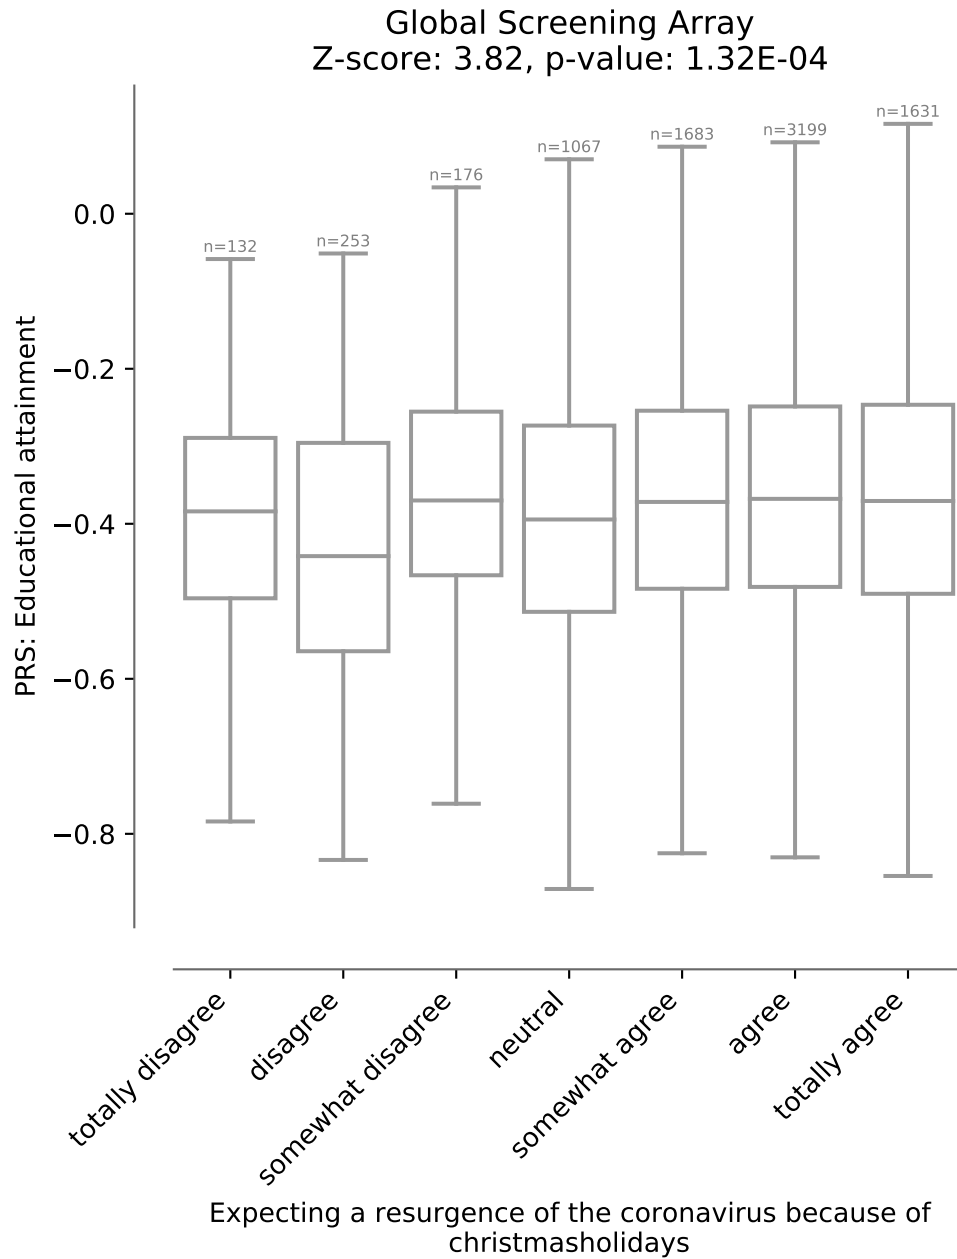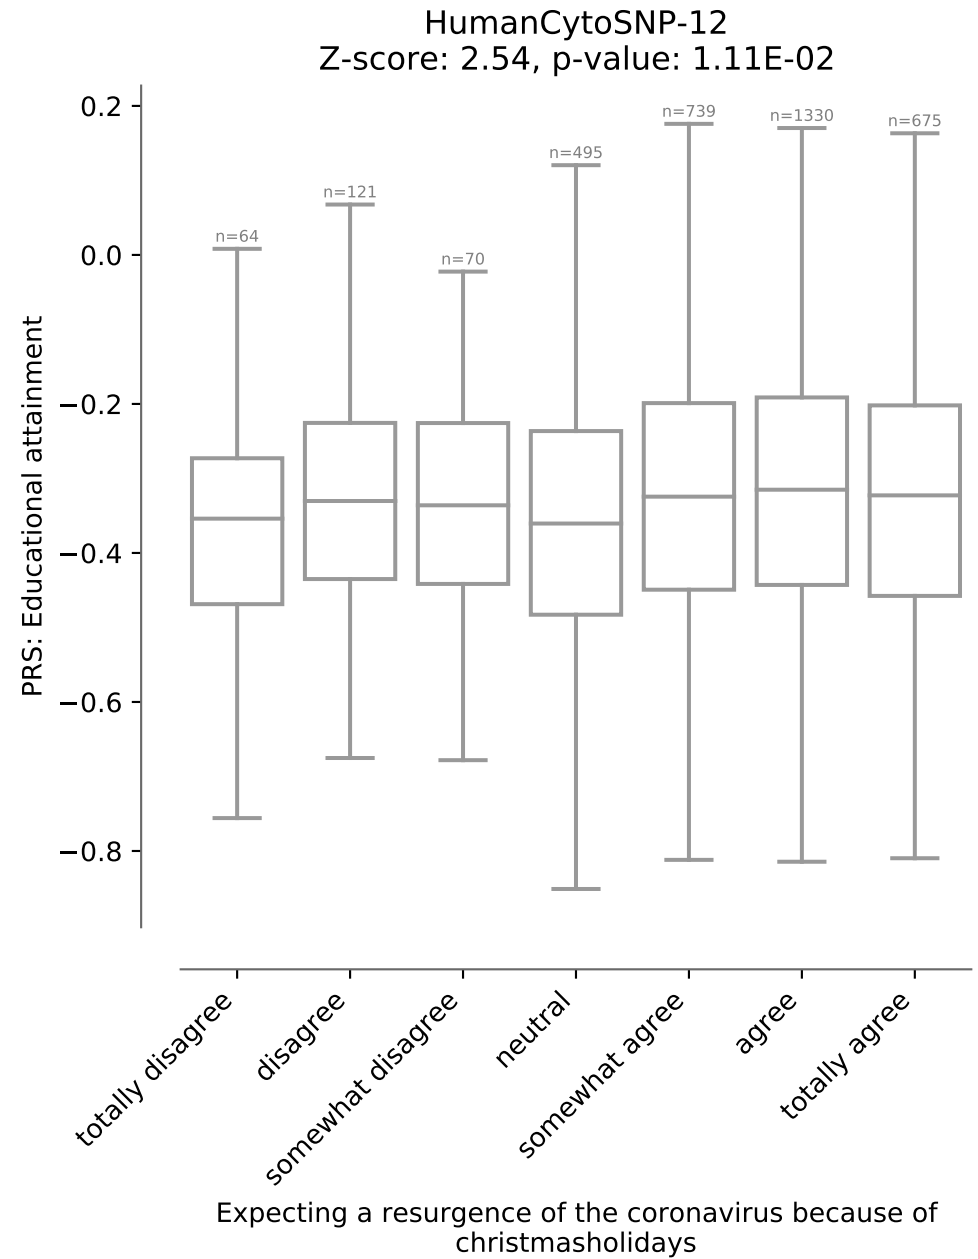

Keep thinking about bad event that happened  
PGS: Educational attainment  
Meta analysis Z-score: -9.67, p-value: 4.13E-22

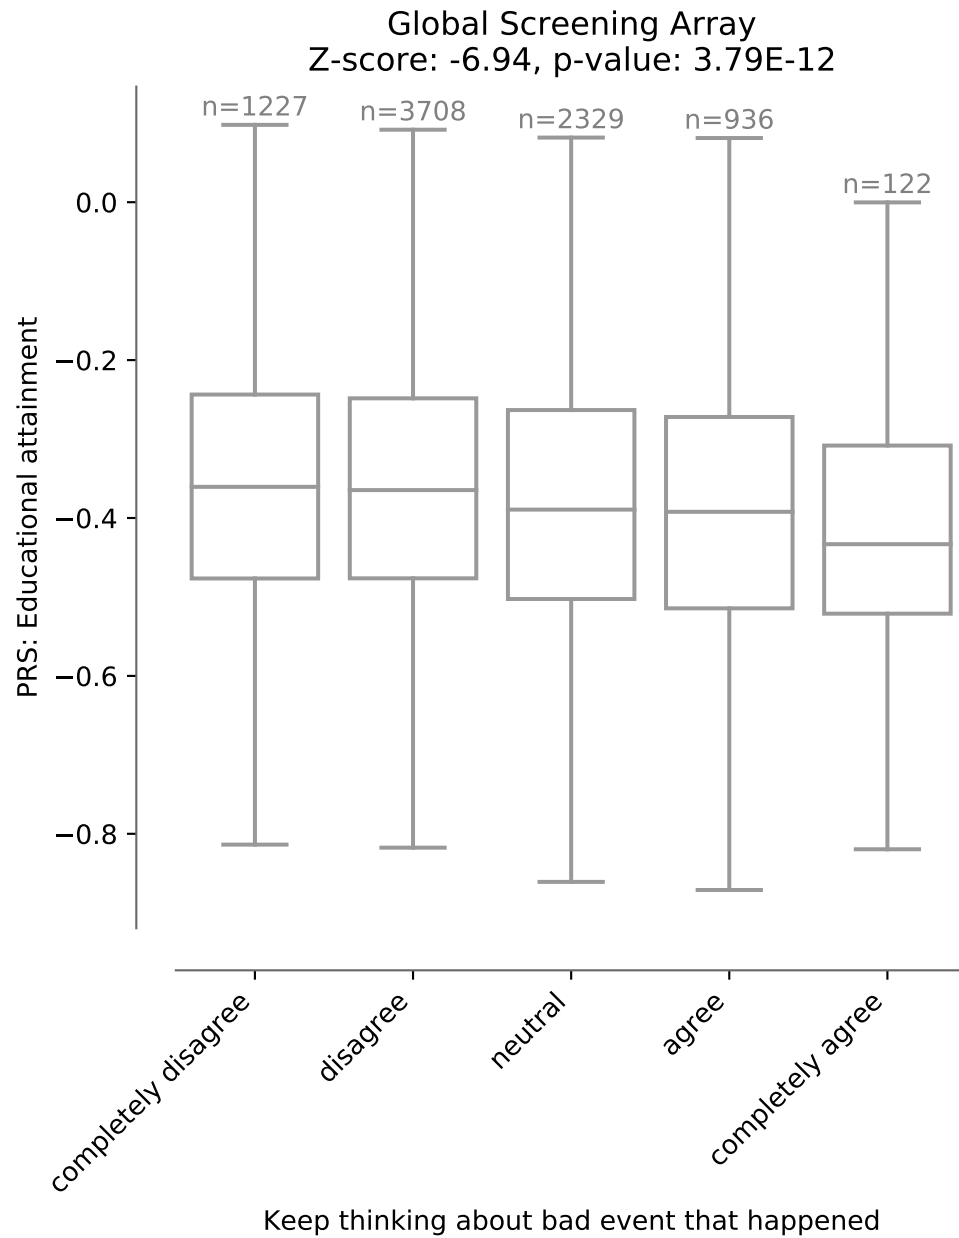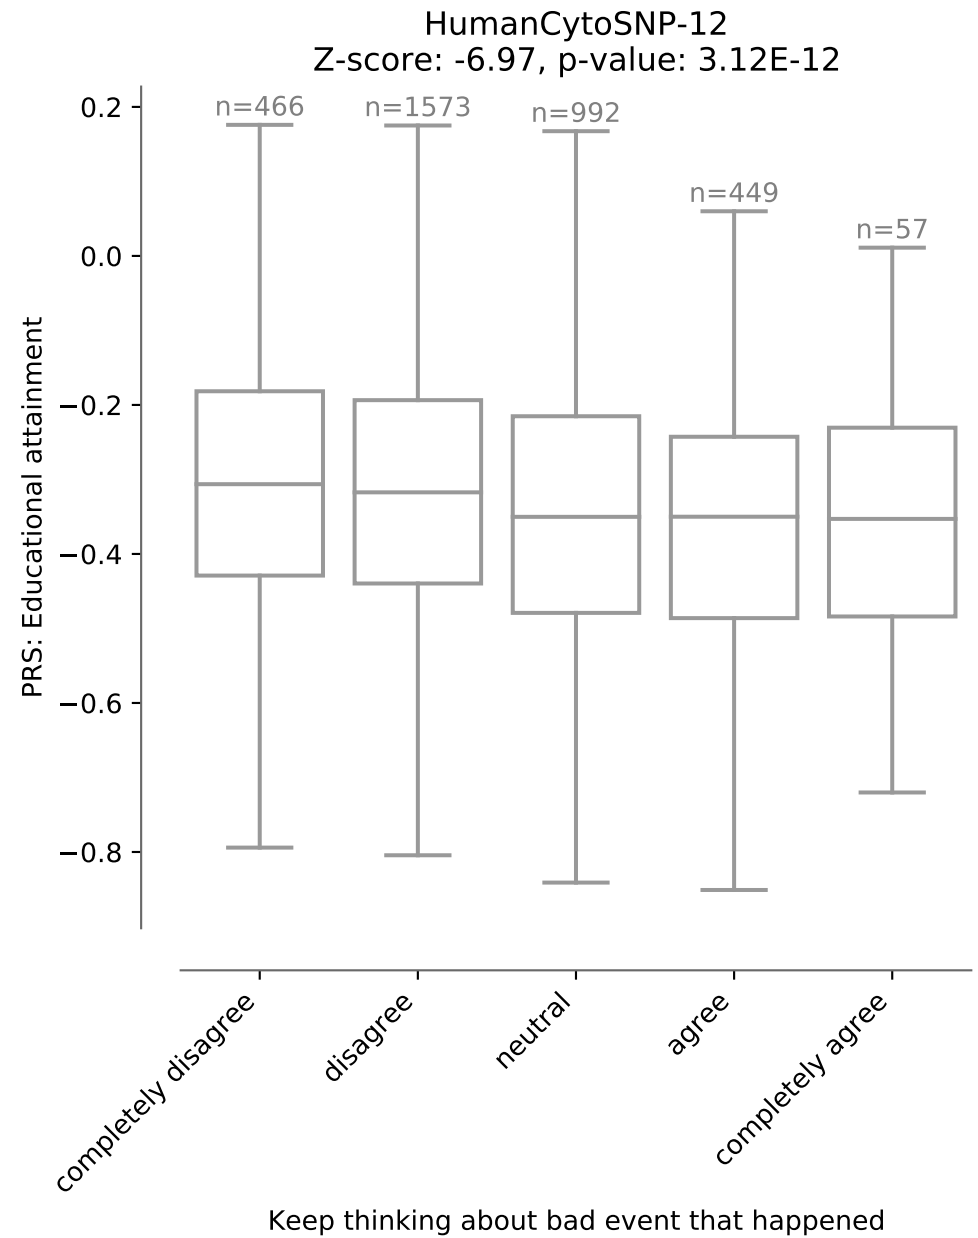

Keep thinking about bad event that happened  
PGS: Life satisfaction  
Meta analysis Z-score: -4.64, p-value: 3.47E-06

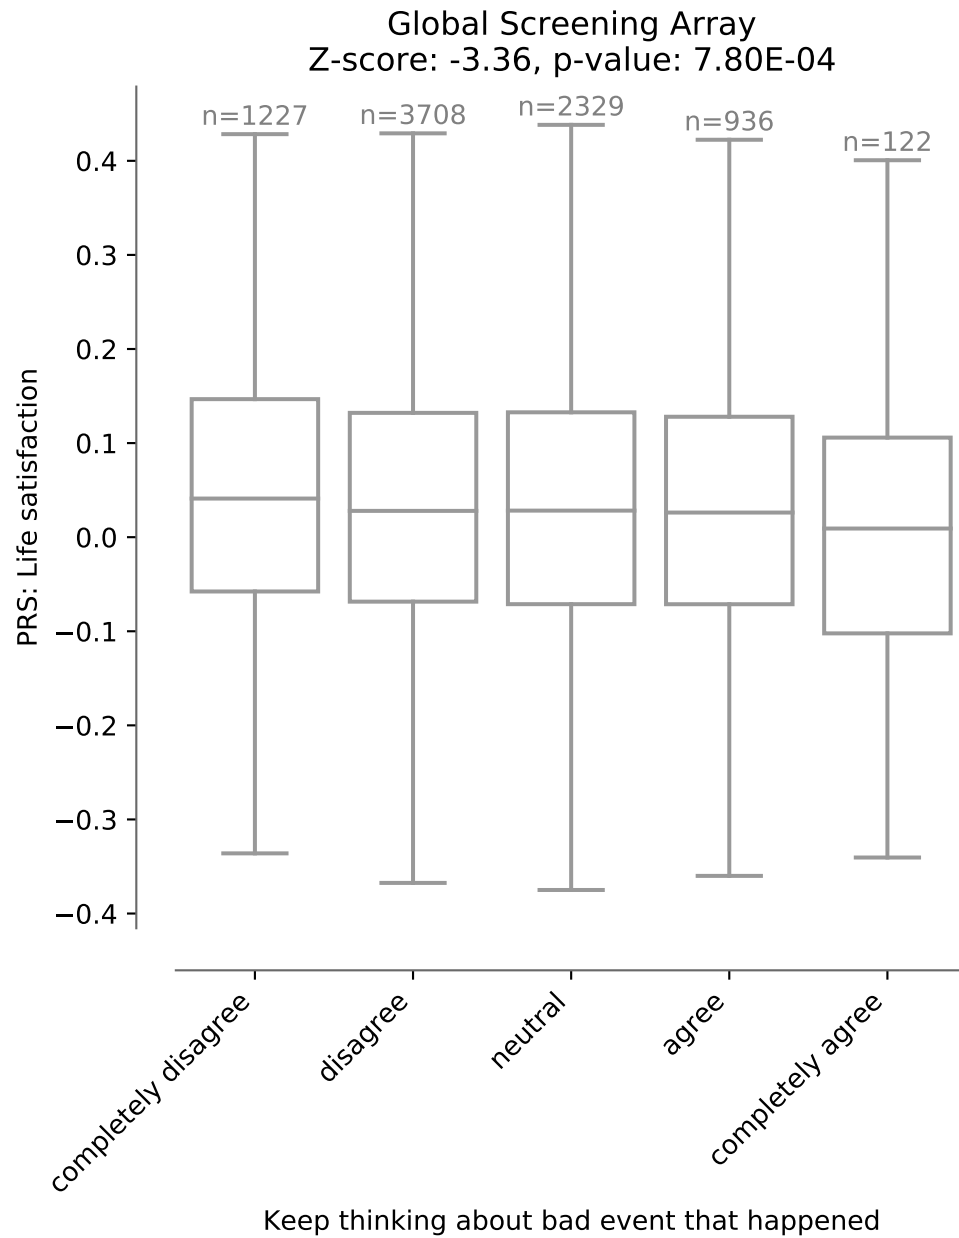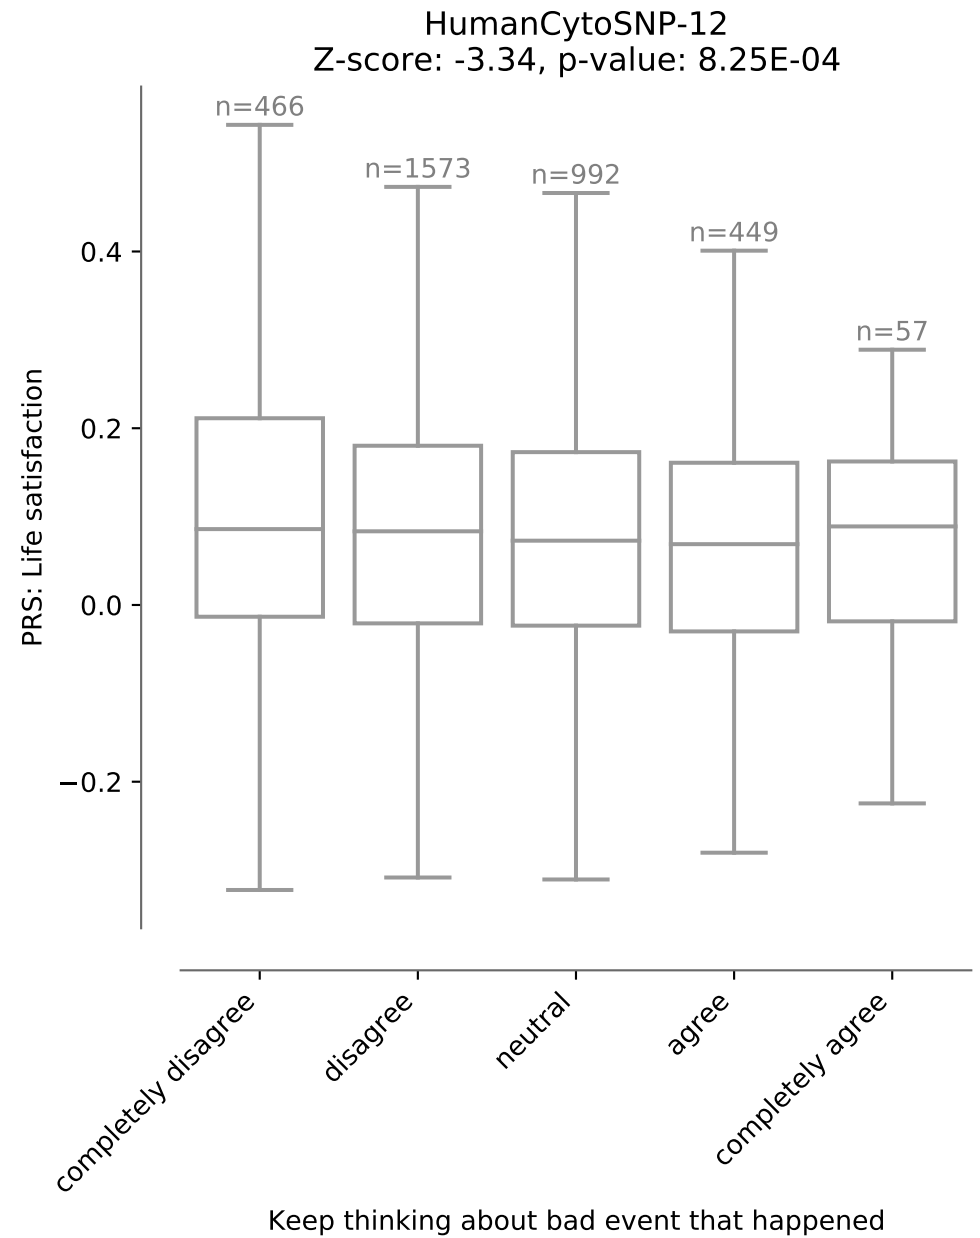

Keep thinking about bad event that happened  
PGS: Neuroticism  
Meta analysis Z-score: 7.72, p-value: 1.14E-14

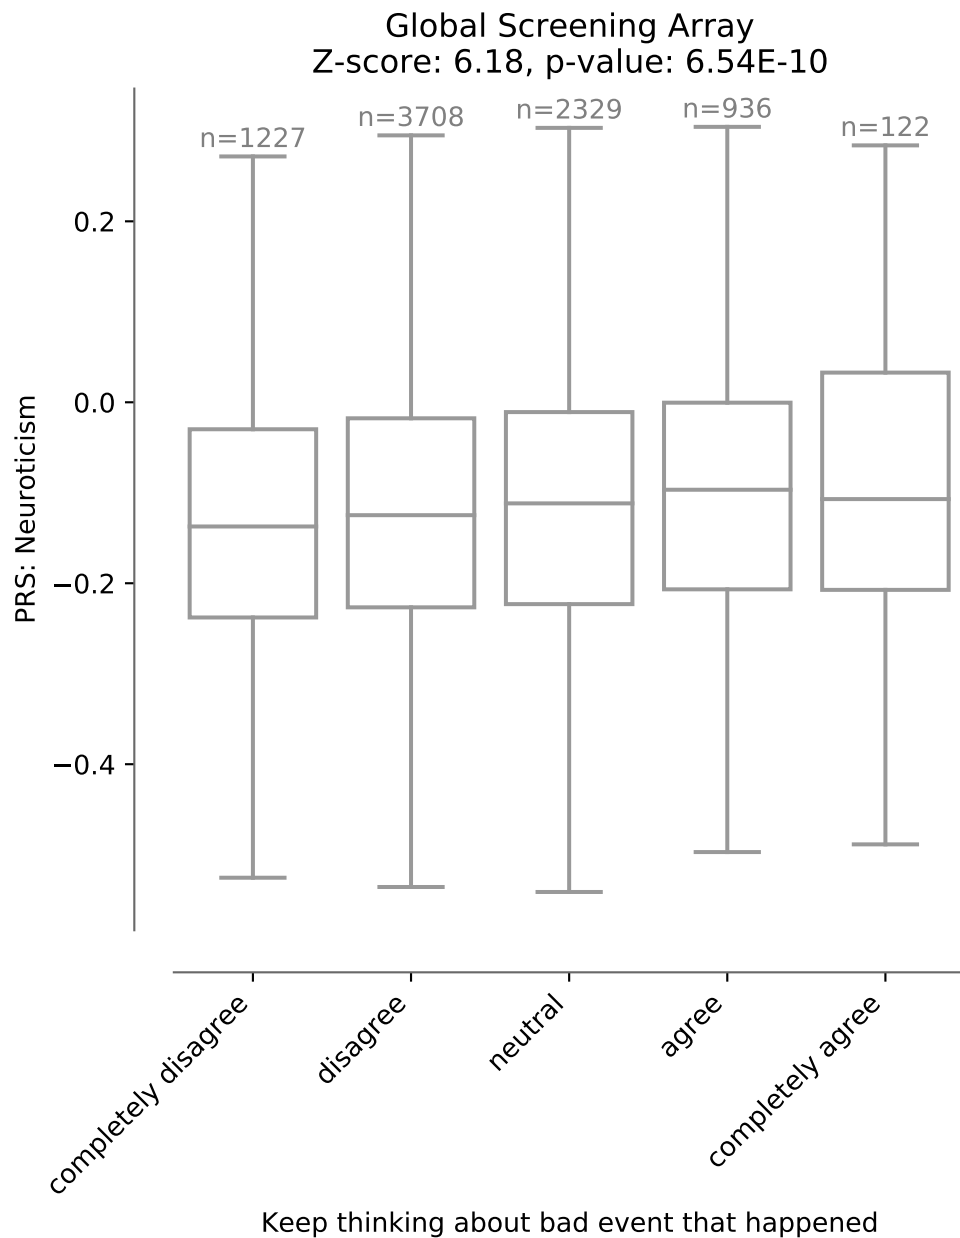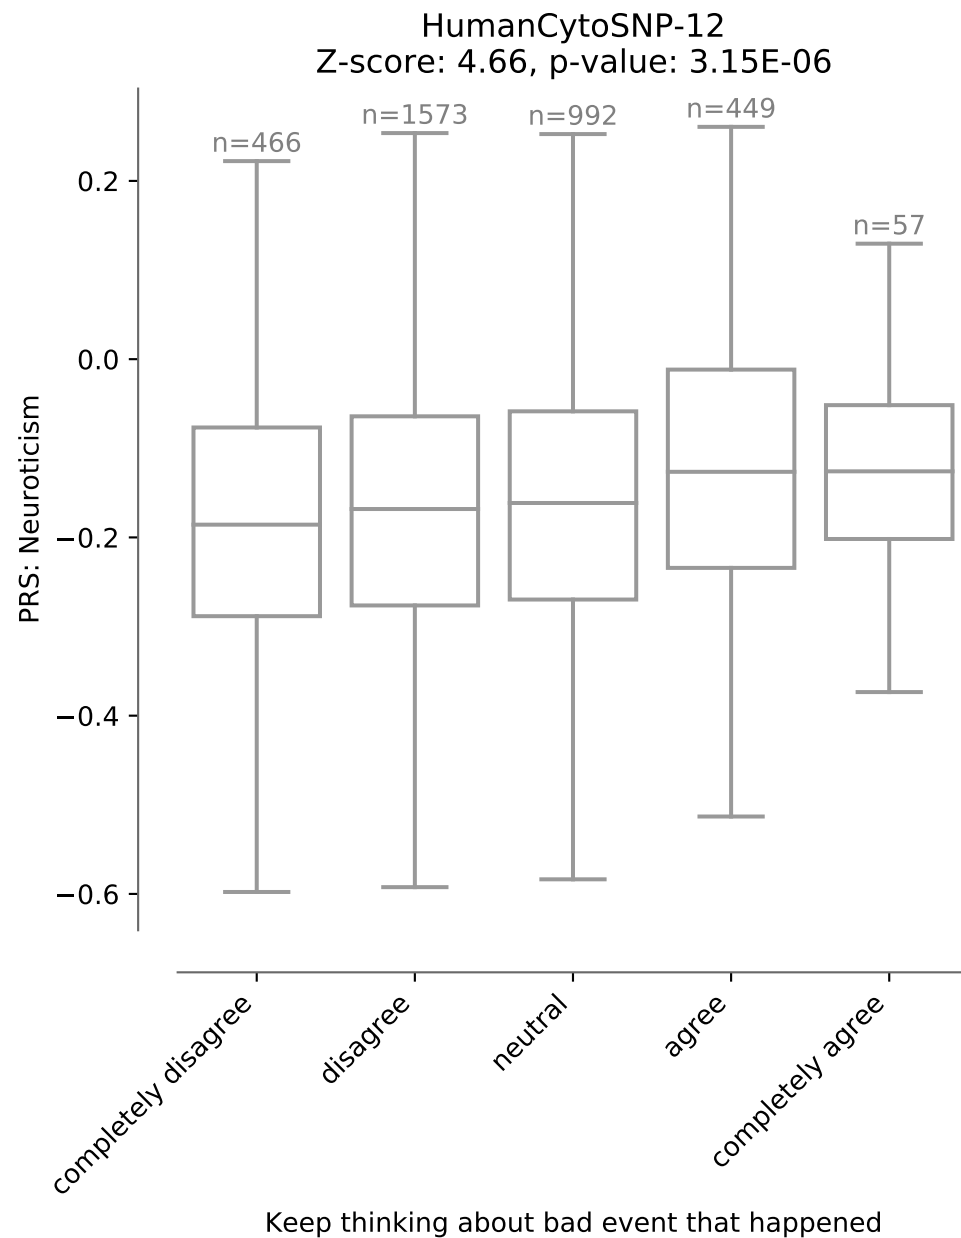



Doing every possible thing to help those who are infected  
PGS: Educational attainment  
Meta analysis Z-score: -6.28, p-value: 3.42E-10

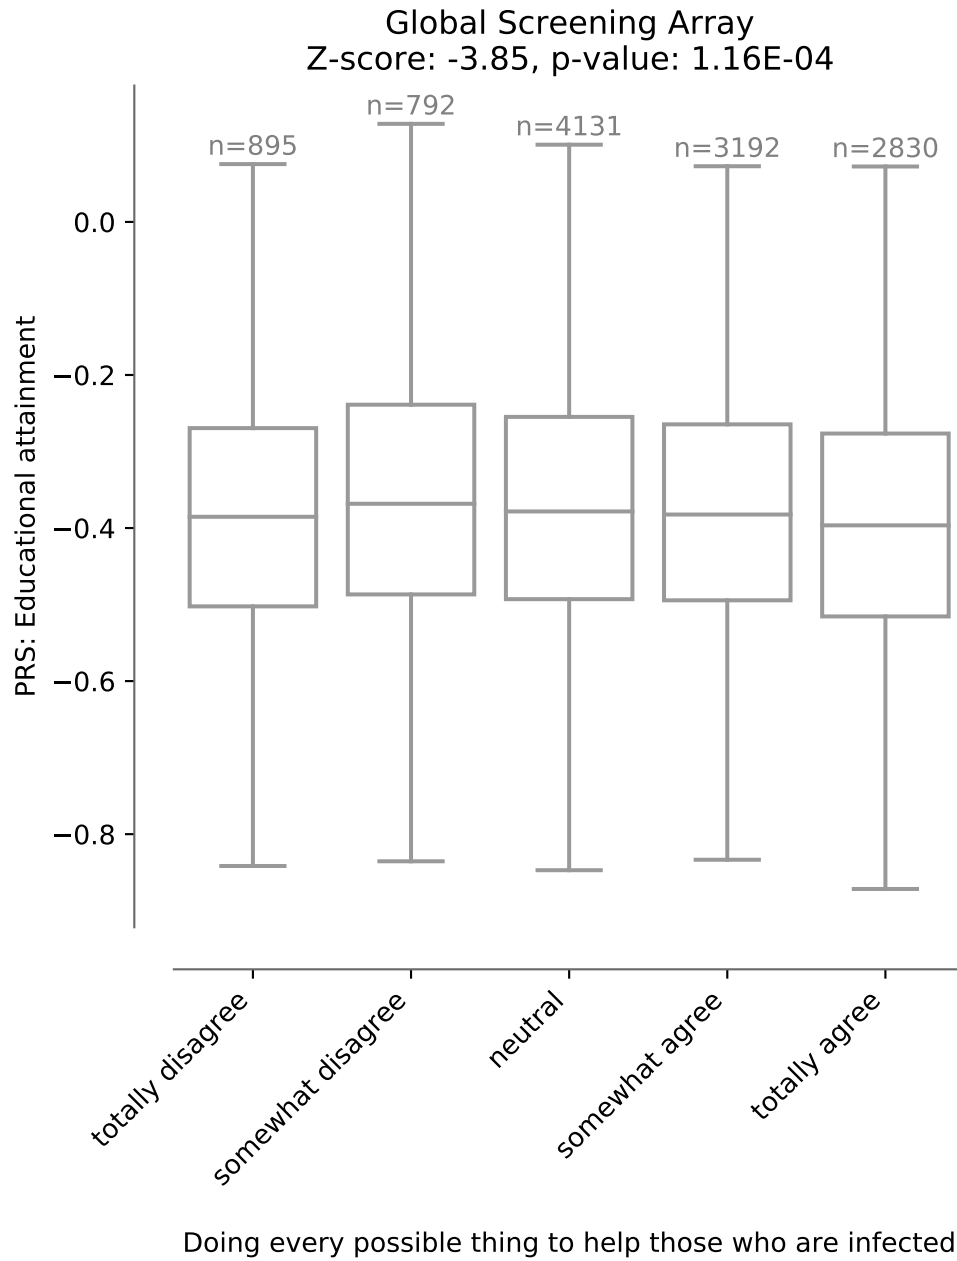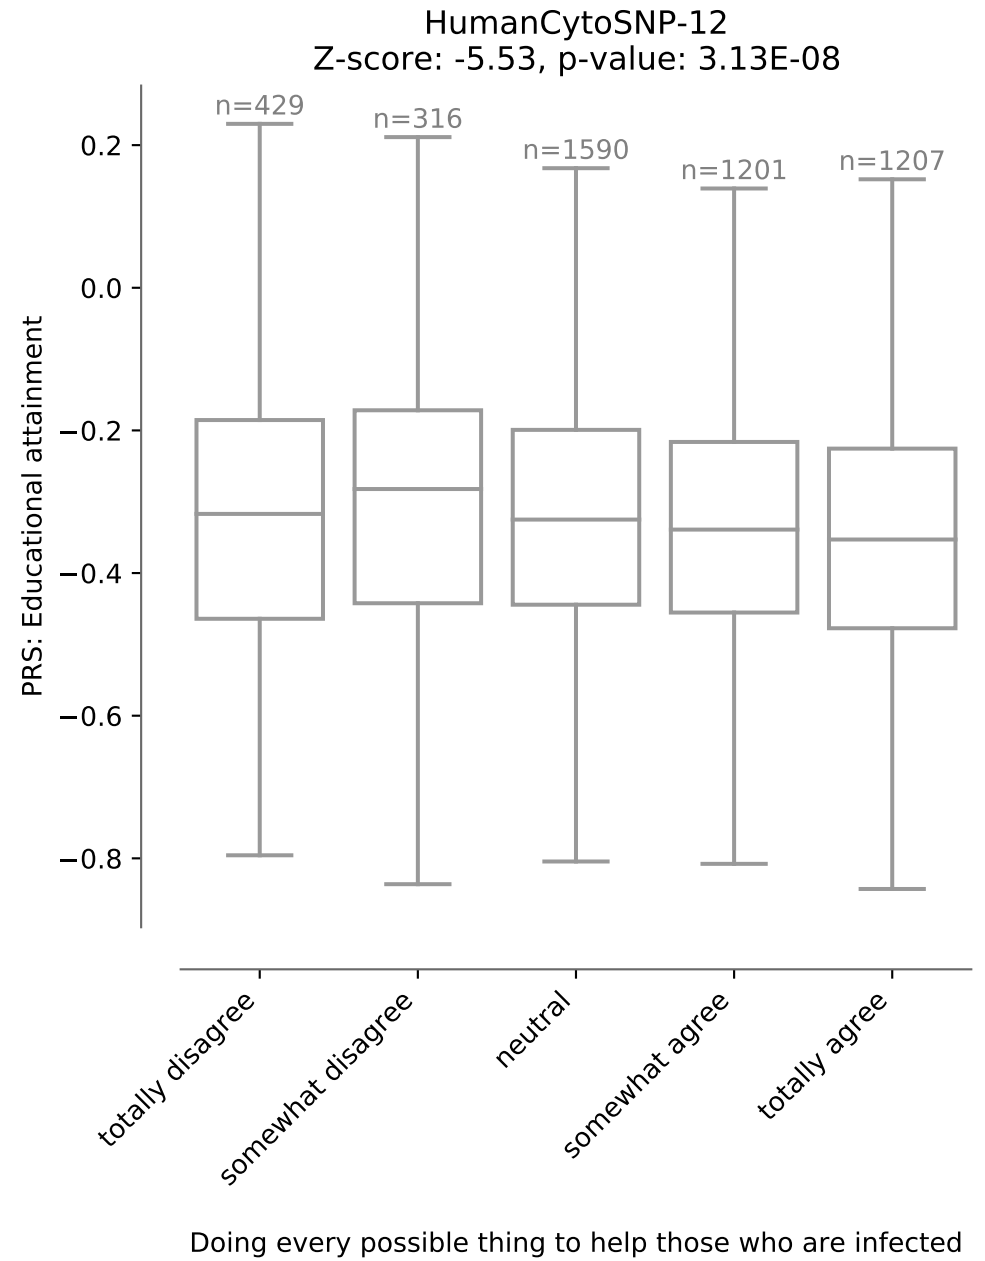

Finding facemasks lying around in the street and in nature problematic

PGS: Educational attainment

Meta analysis Z-score: -5.40, p-value: 6.63E-08

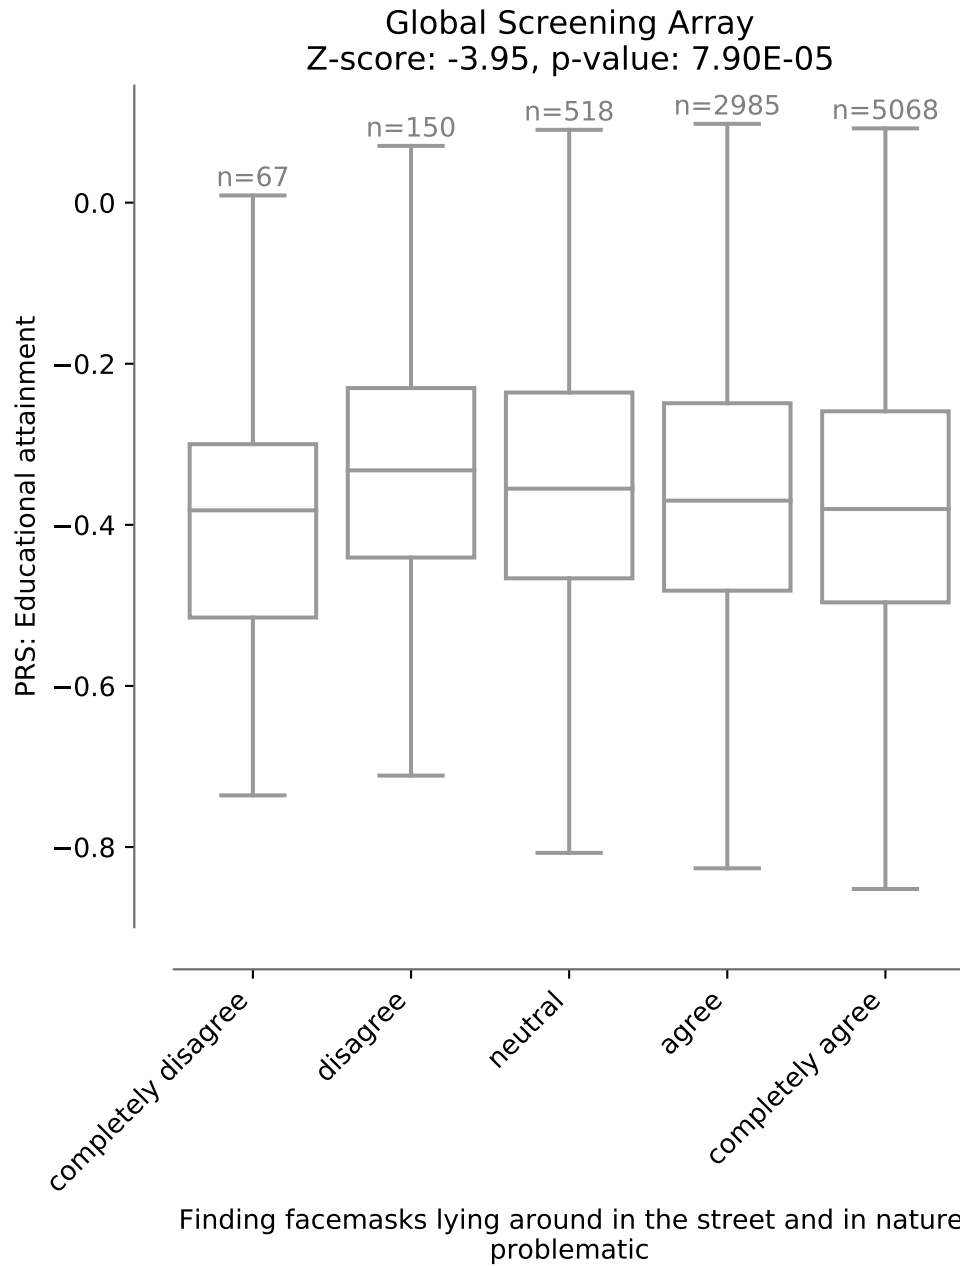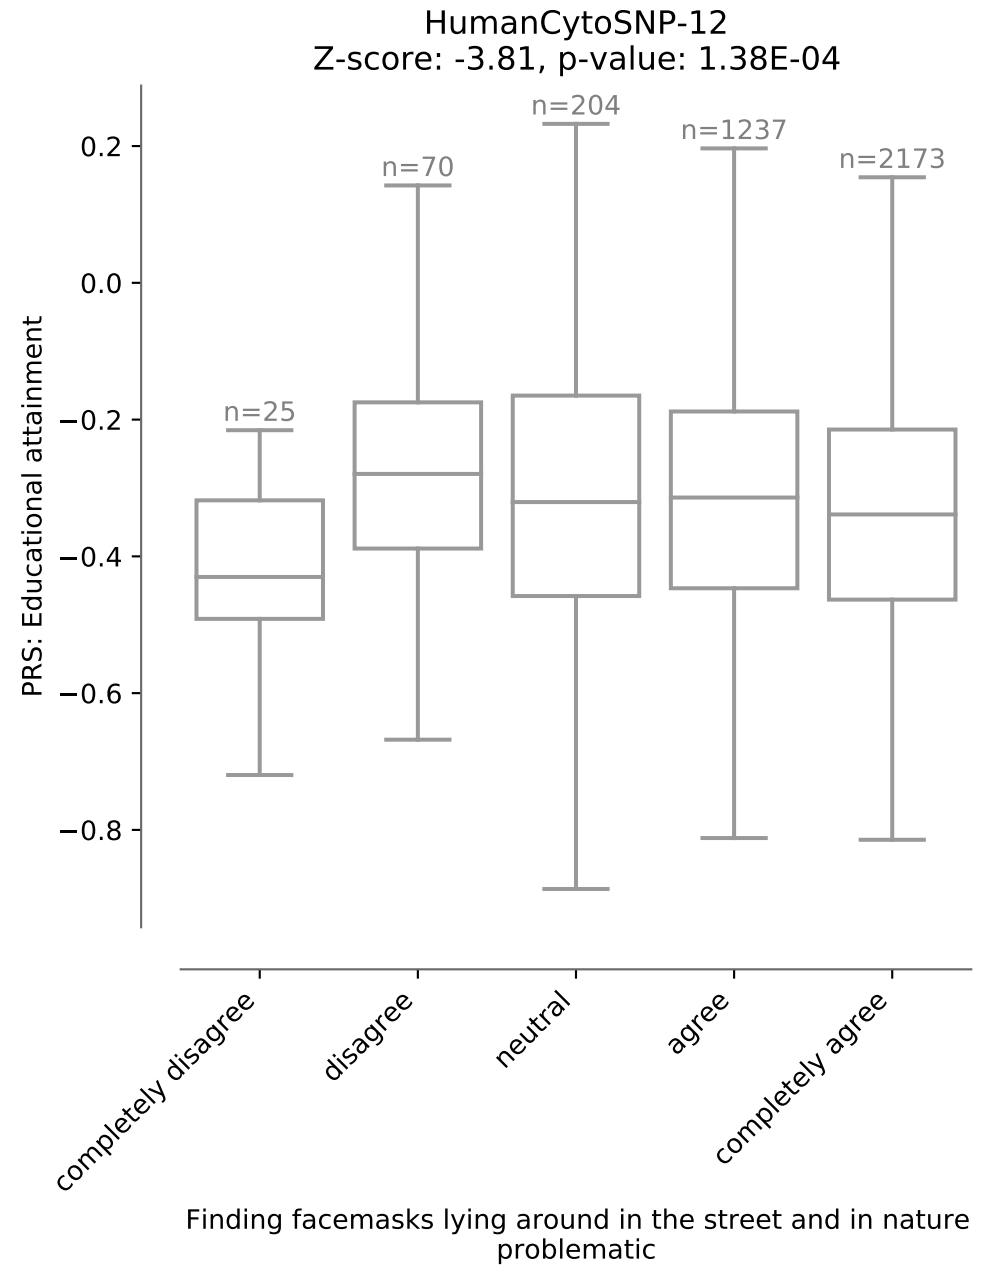

Recovering quickly after difficult times  
PGS: Educational attainment  
Meta analysis Z-score: 7.99, p-value: 1.31E-15

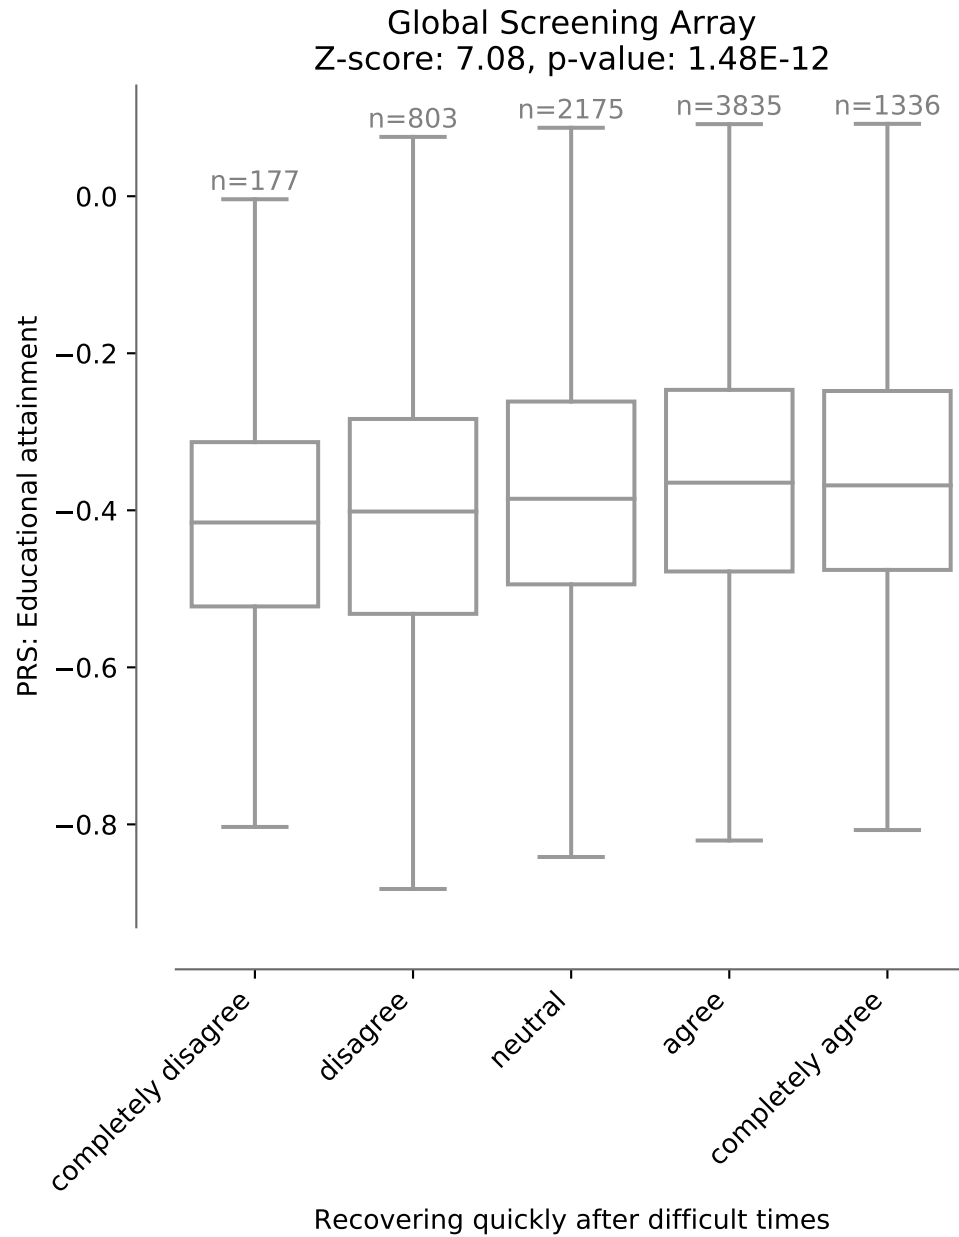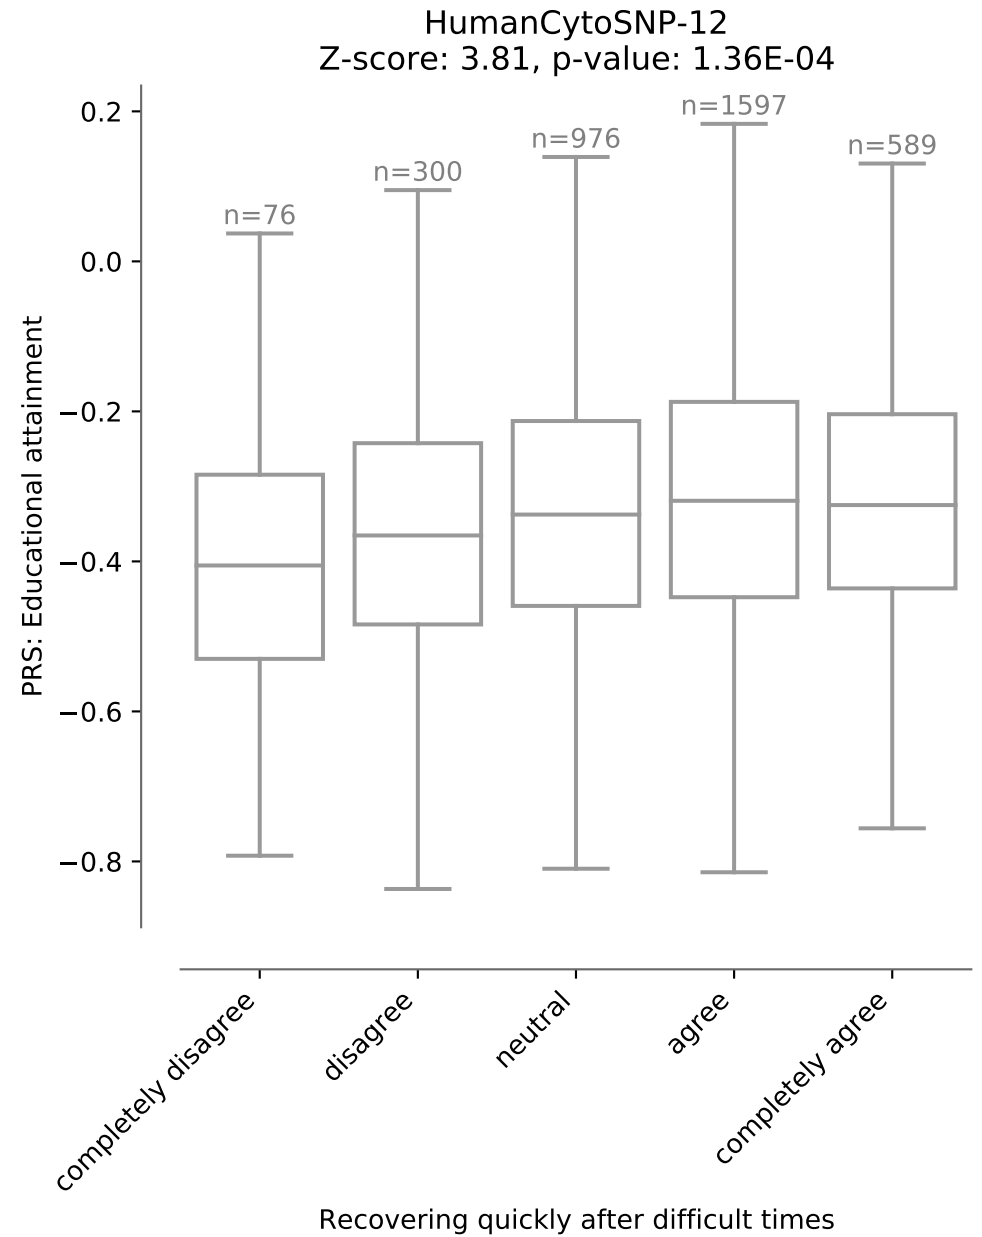

Recovering quickly after difficult times  
PGS: Neuroticism  
Meta analysis Z-score: -5.79, p-value: 7.08E-09

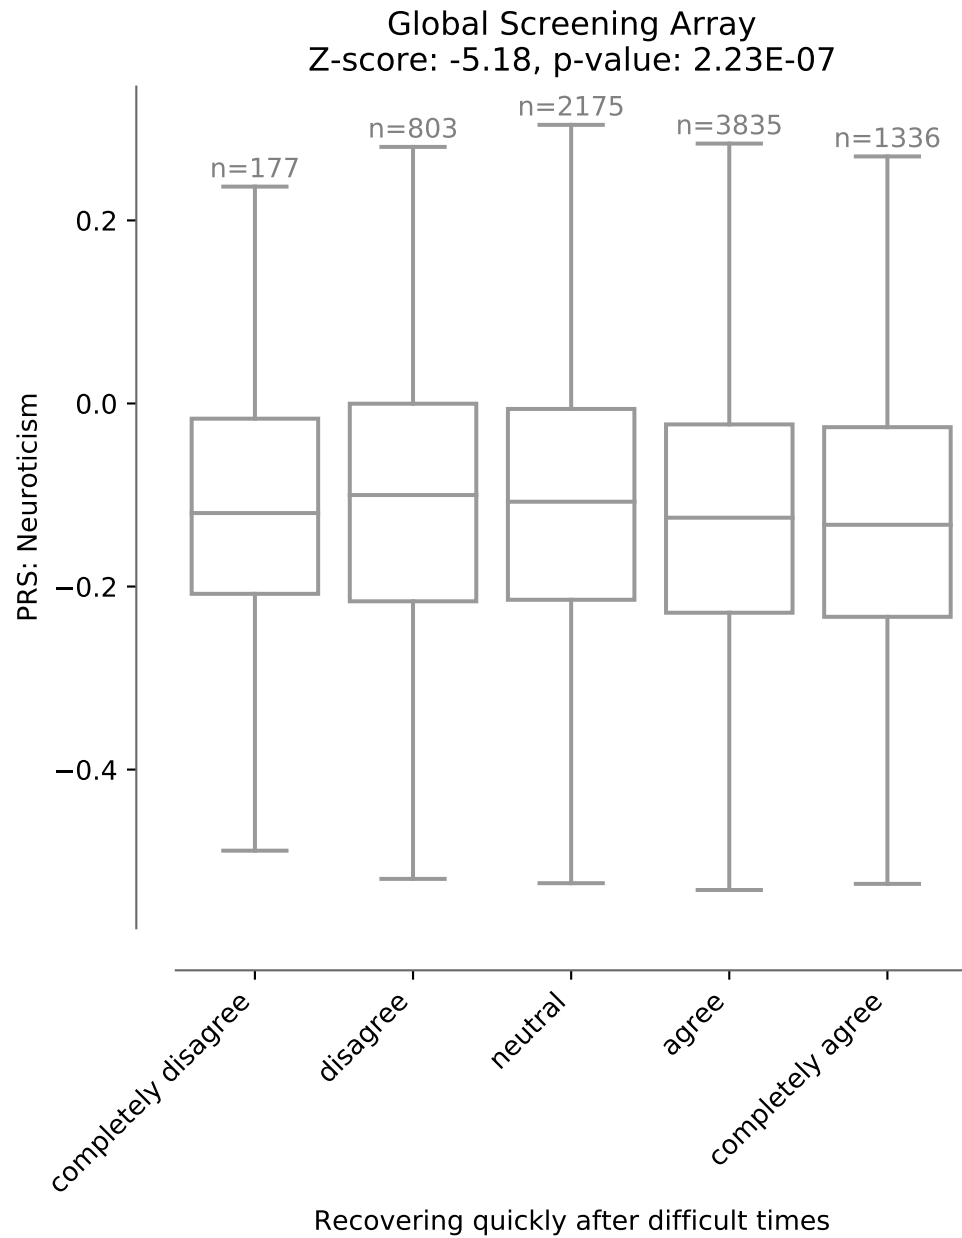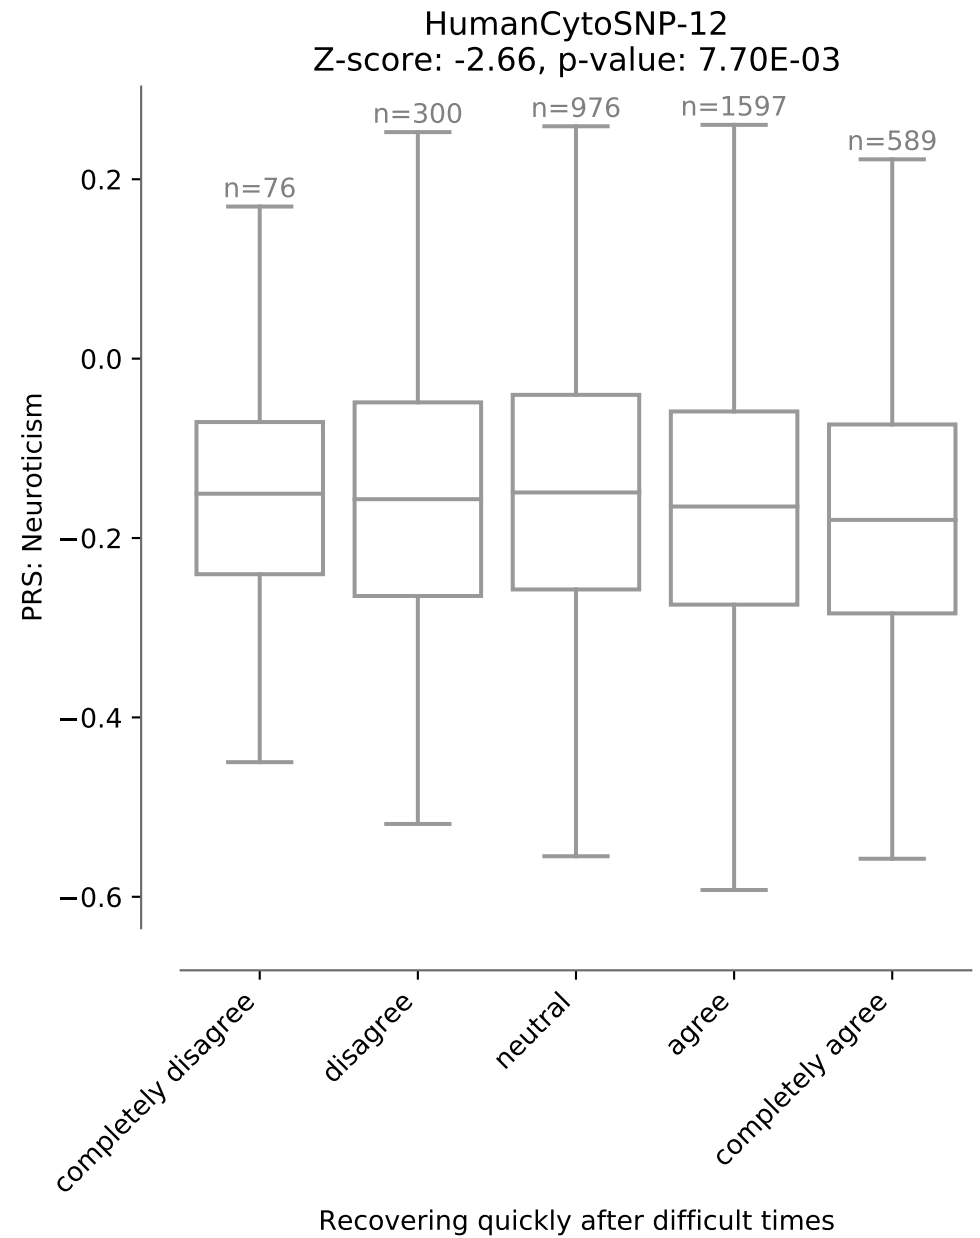

Not feeling appreciated in society  
PGS: BMI  
Meta analysis Z-score: 4.65, p-value: 3.35E-06

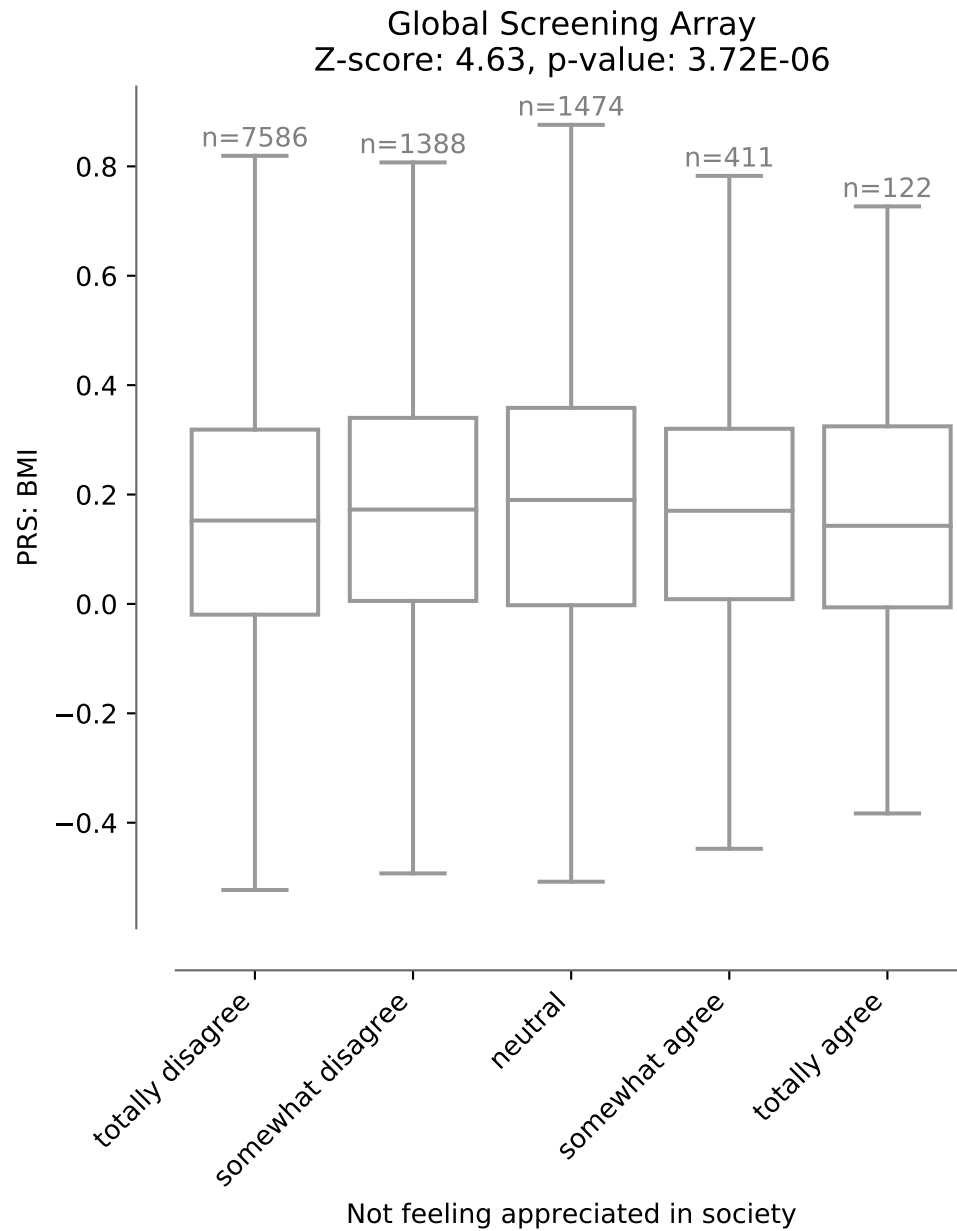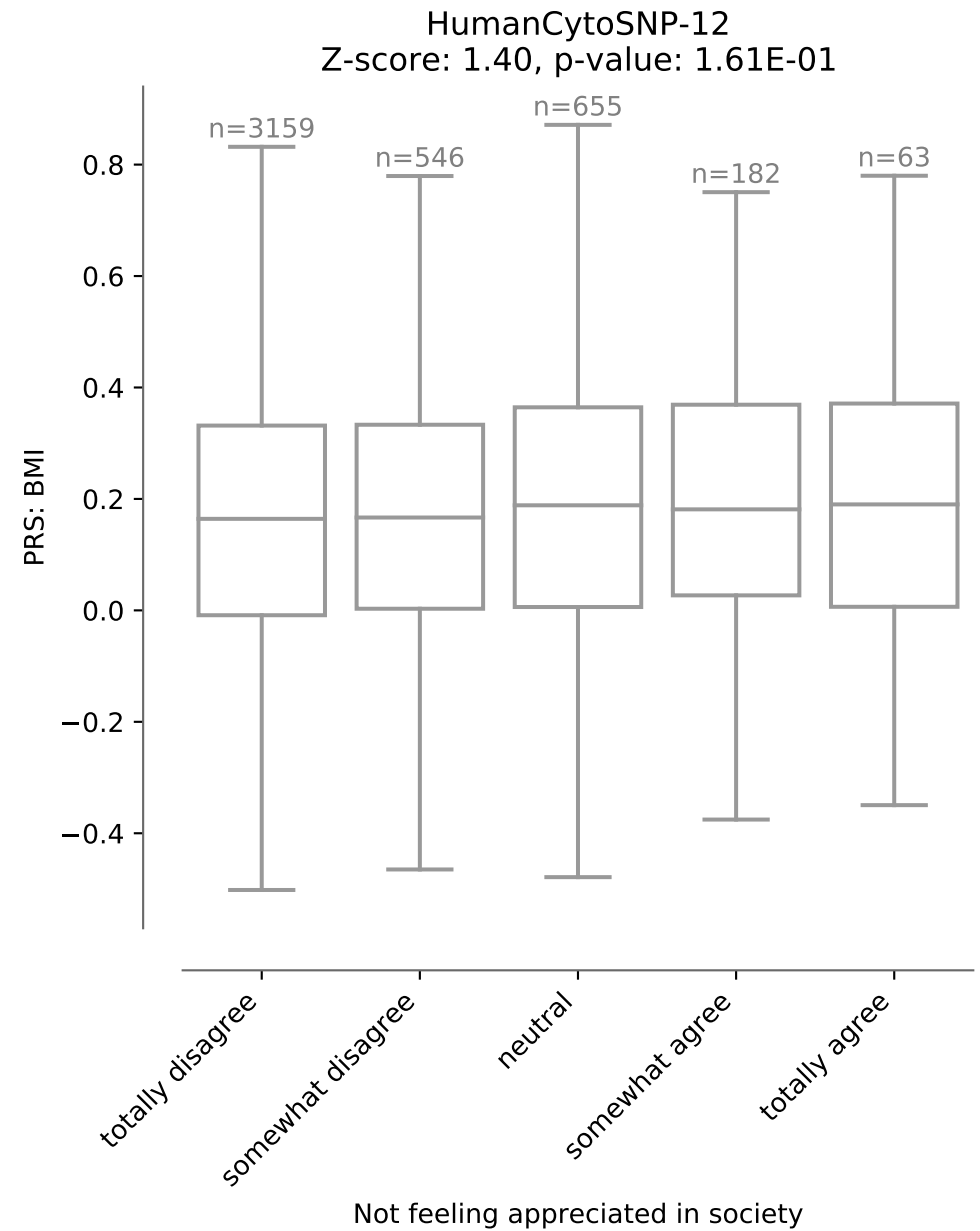

Not feeling appreciated in society  
PGS: Life satisfaction  
Meta analysis Z-score: -5.23, p-value: 1.66E-07

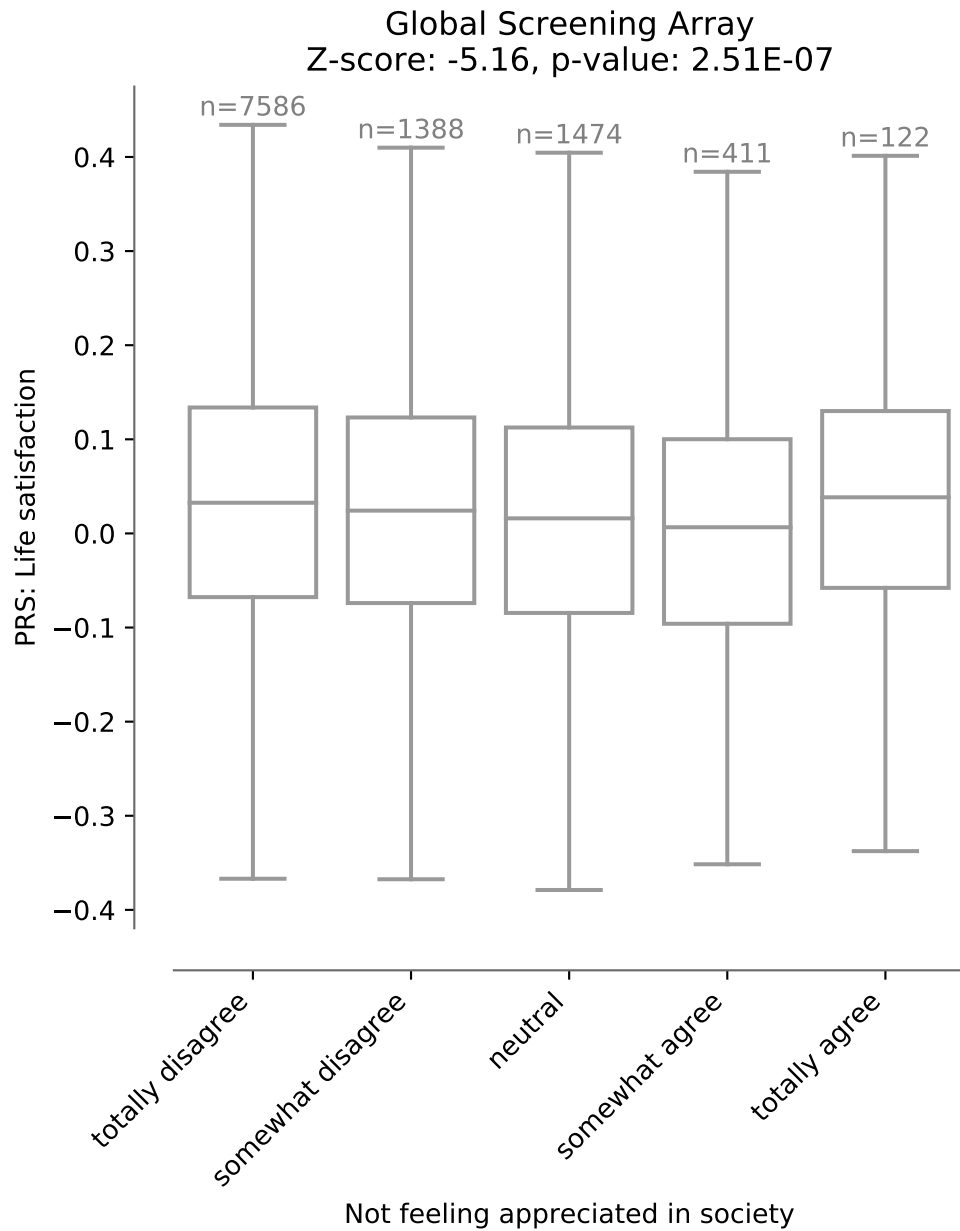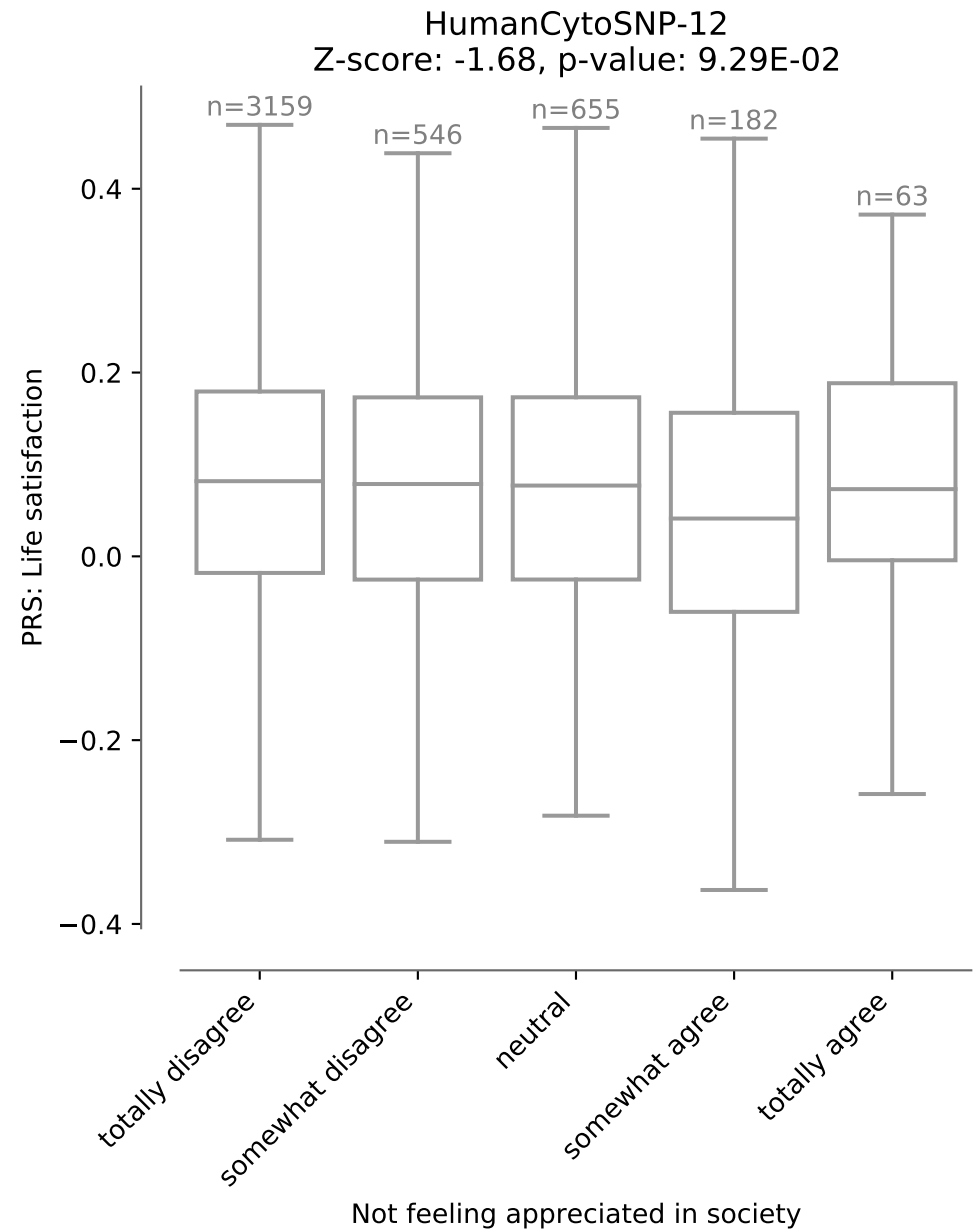

Not feeling appreciated in society  
PGS: Neuroticism  
Meta analysis Z-score: 4.59, p-value: 4.50E-06

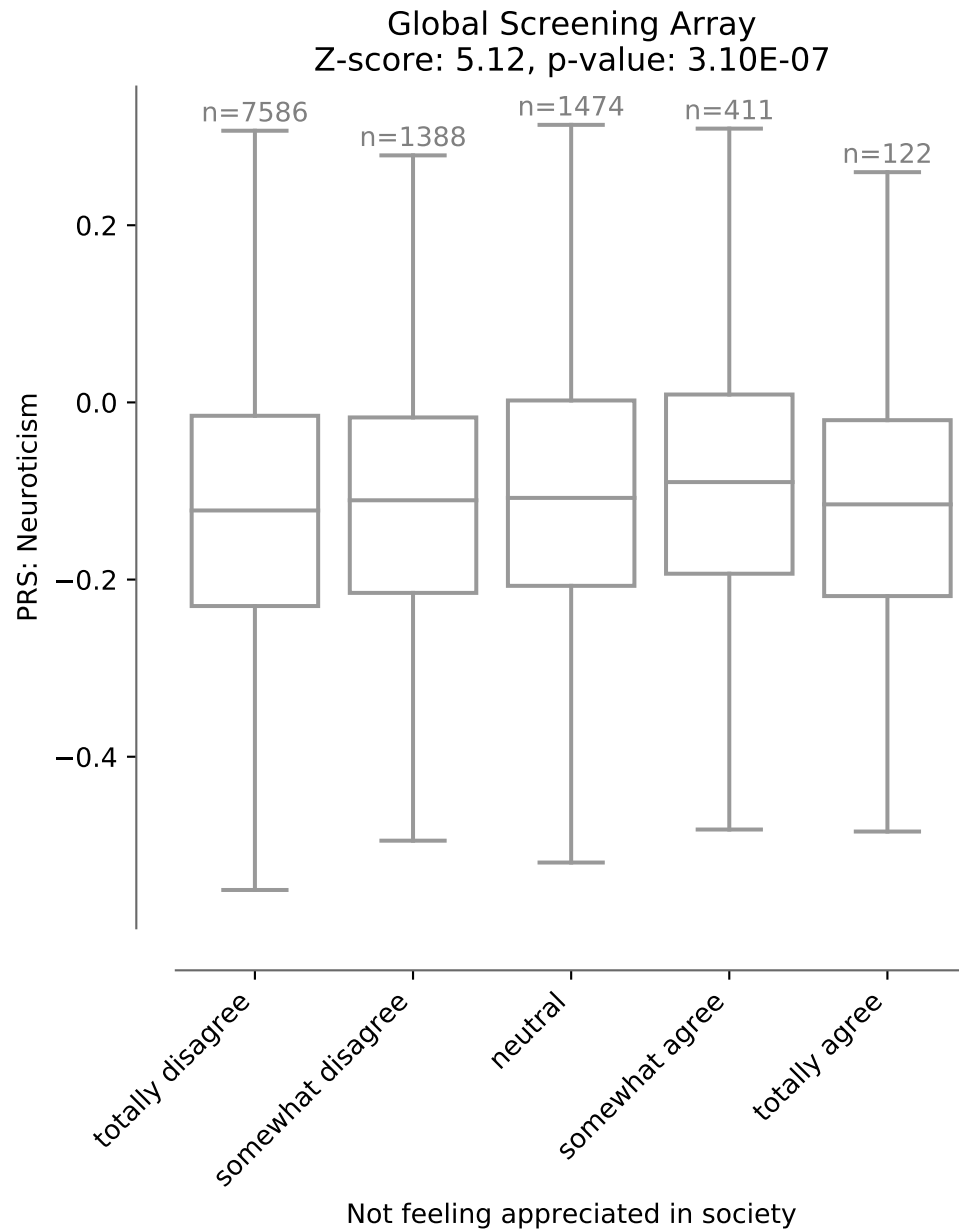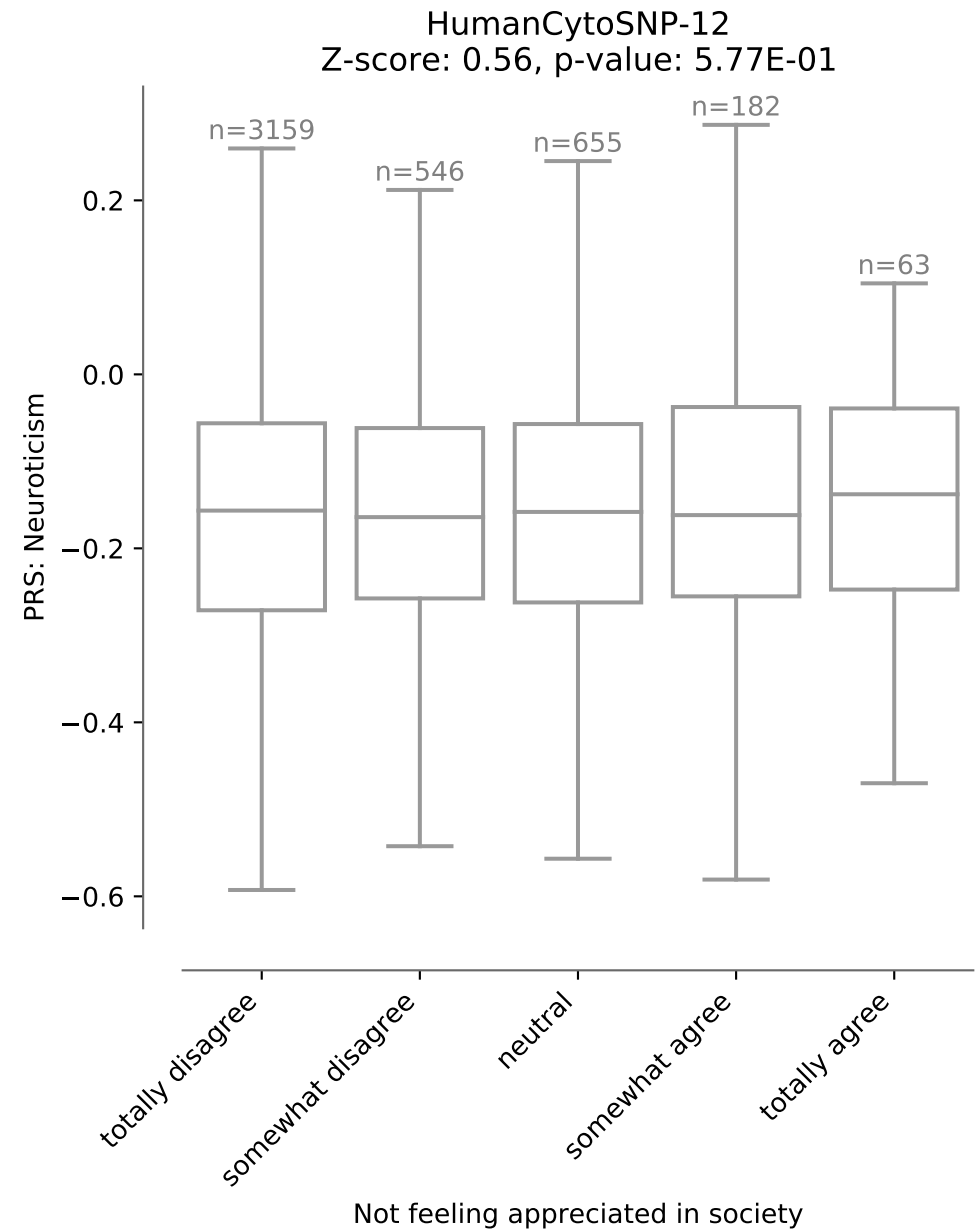

# Having faith in the response of the government to COVID-19

PGS: Educational attainment

Meta analysis Z-score: 6.10, p-value: 1.05E-09

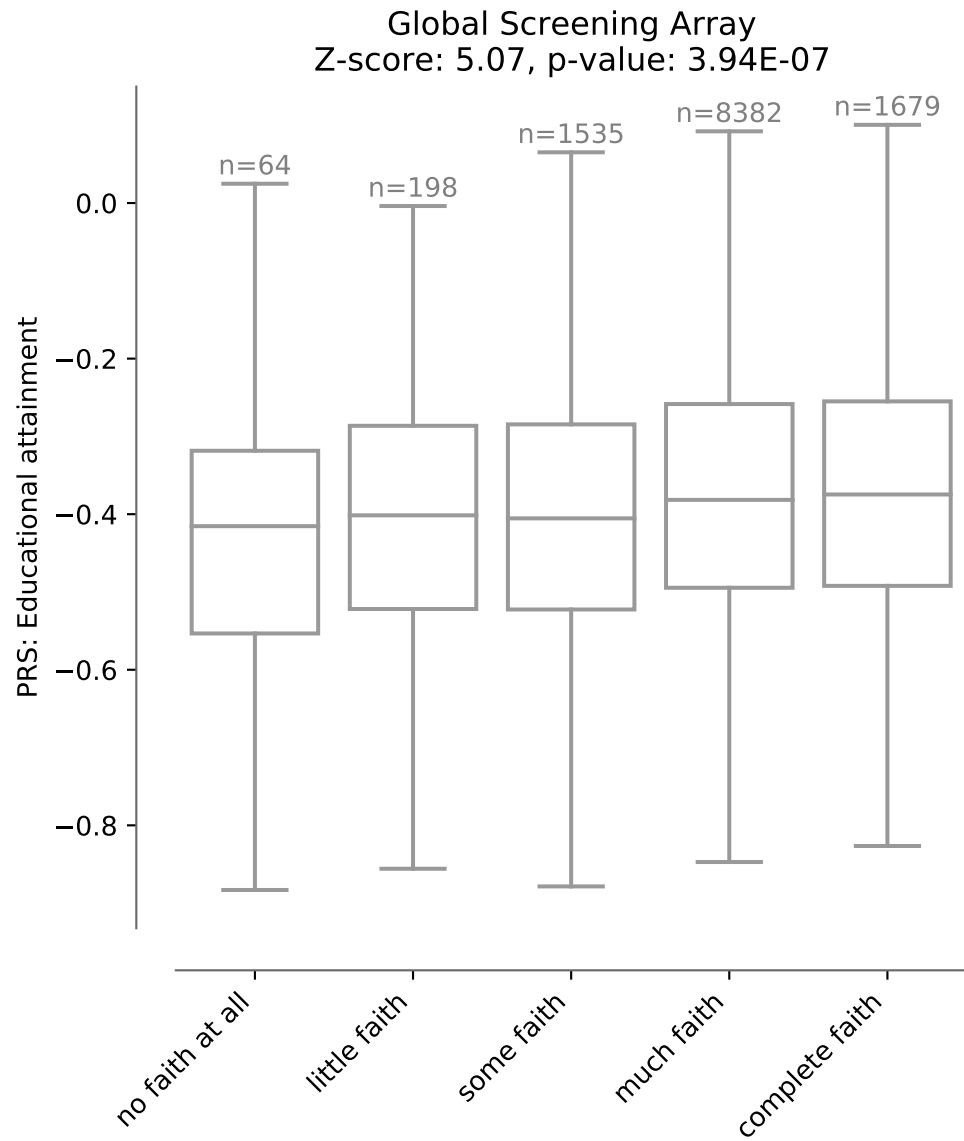

Having faith in the response of the government to COVID-19

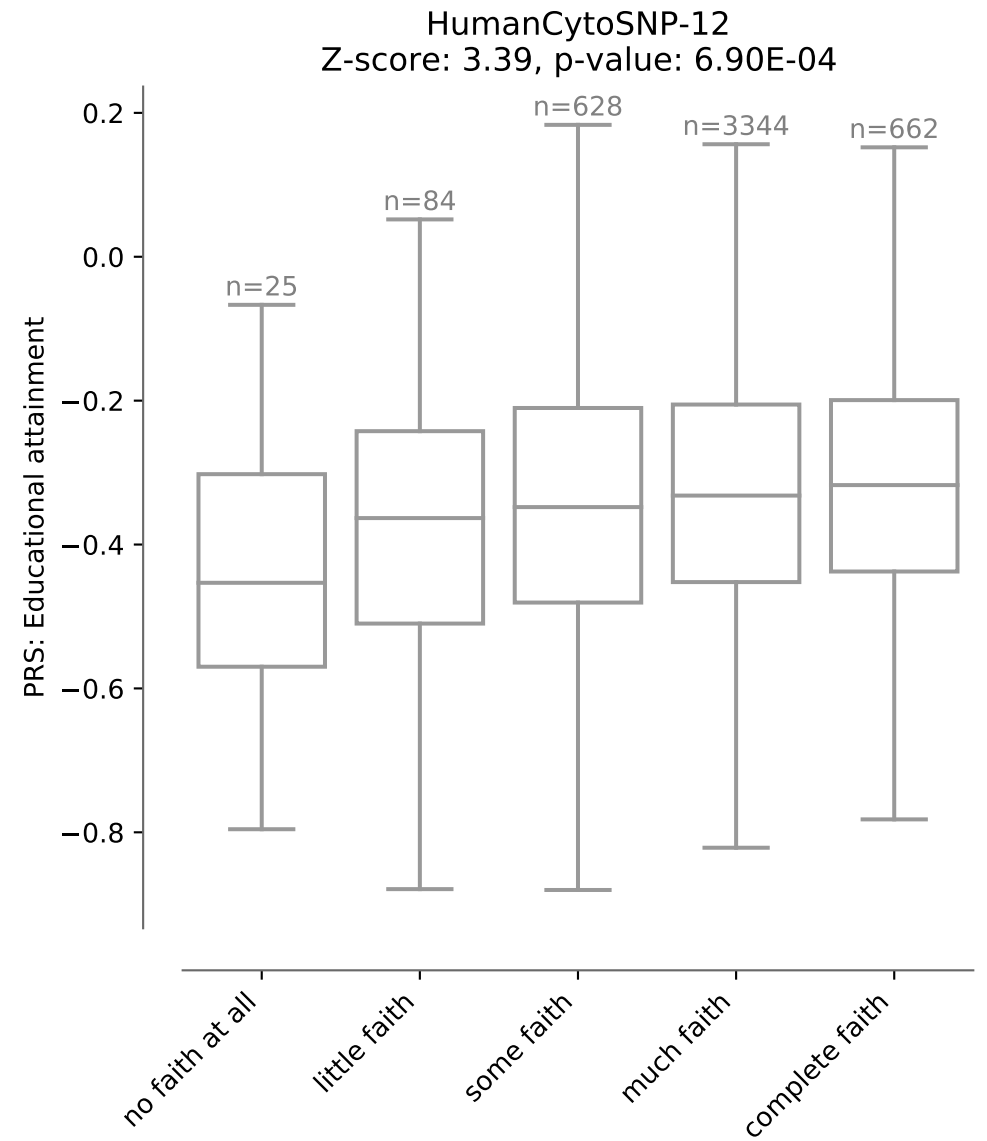

Having faith in the response of the government to COVID-19



# Having faith in the response of the government to COVID-19

PGS: Life satisfaction

Meta analysis Z-score: 7.24, p-value: 4.42E-13

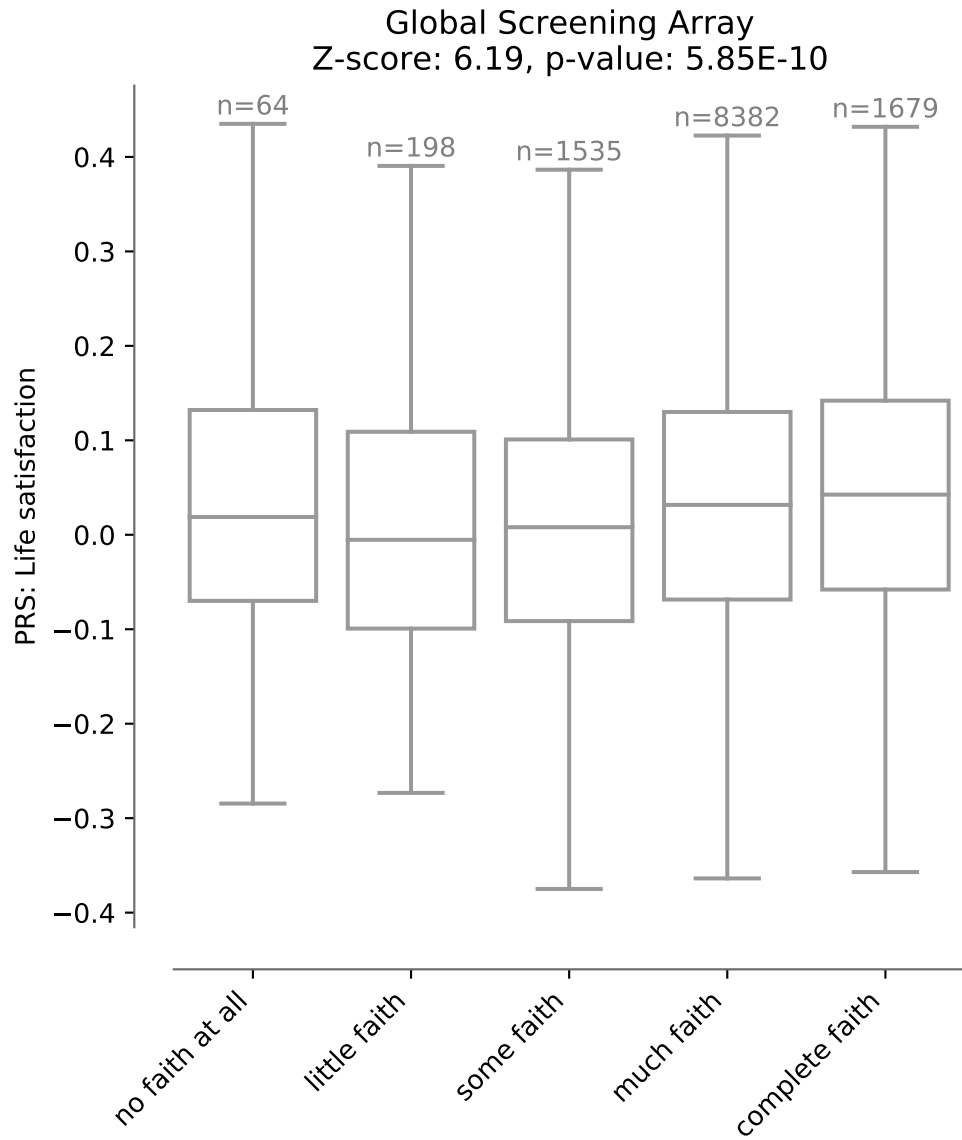

Having faith in the response of the government to COVID-19

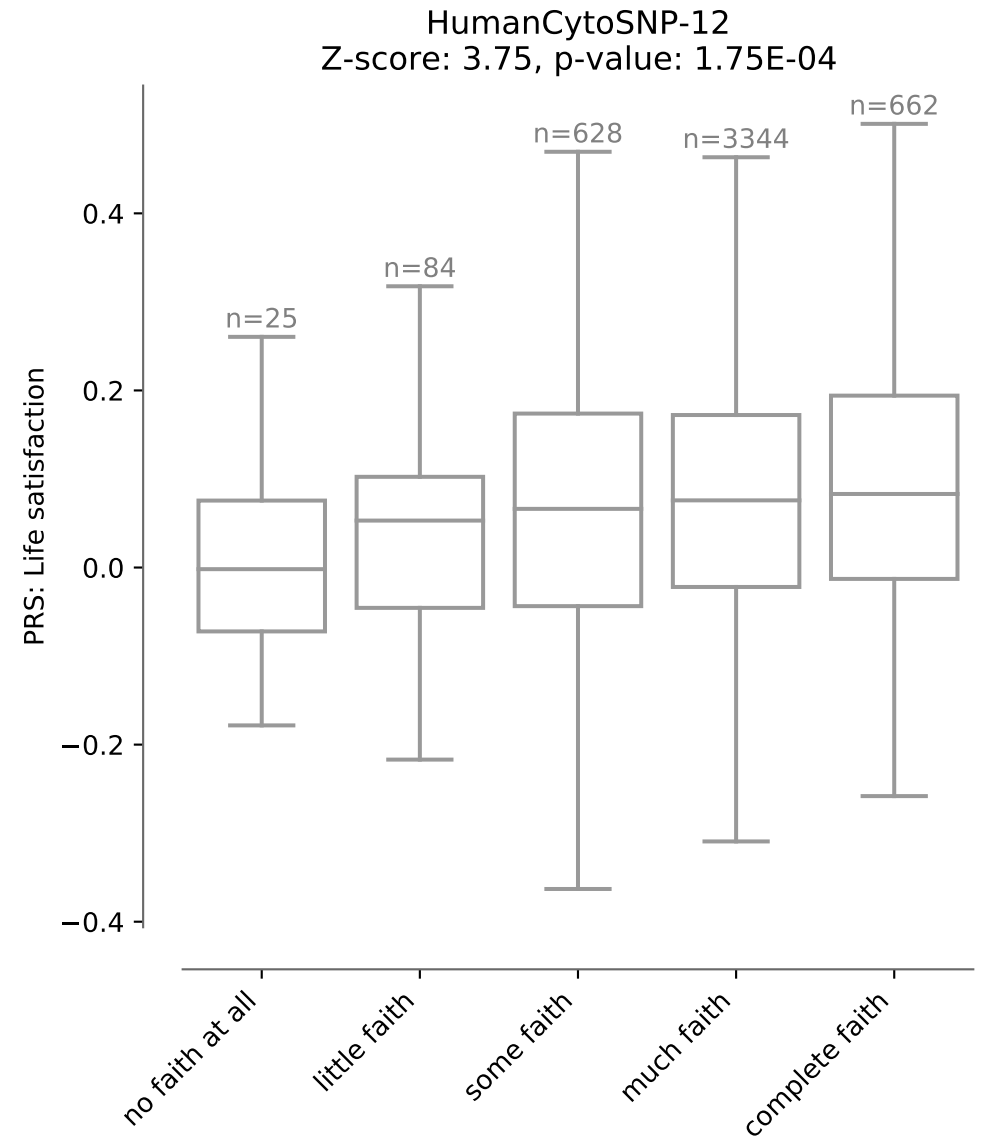

Having faith in the response of the government to COVID-19

Having faith in the response of the government to COVID-19

PGS: Neuroticism

Meta analysis Z-score: -5.63, p-value: 1.84E-08

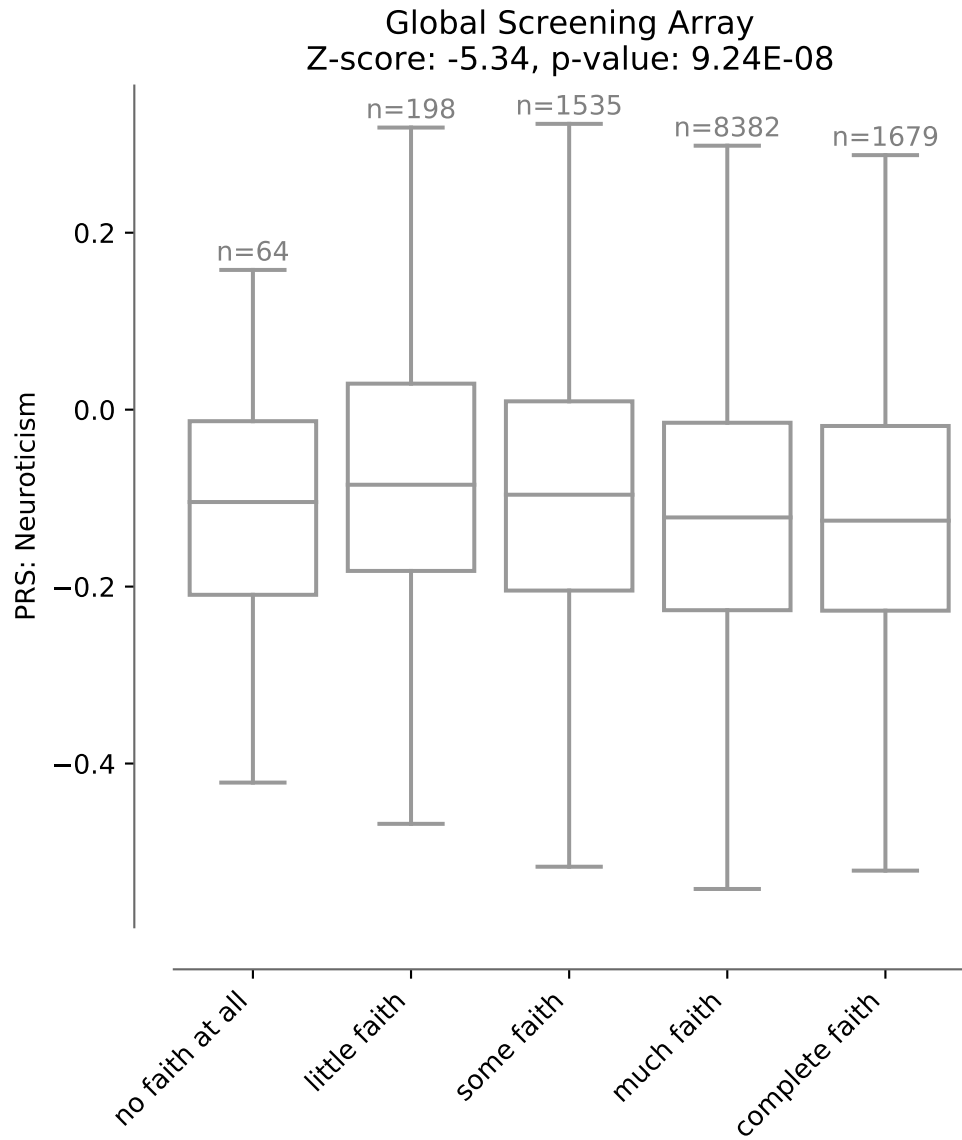

Having faith in the response of the government to COVID-19

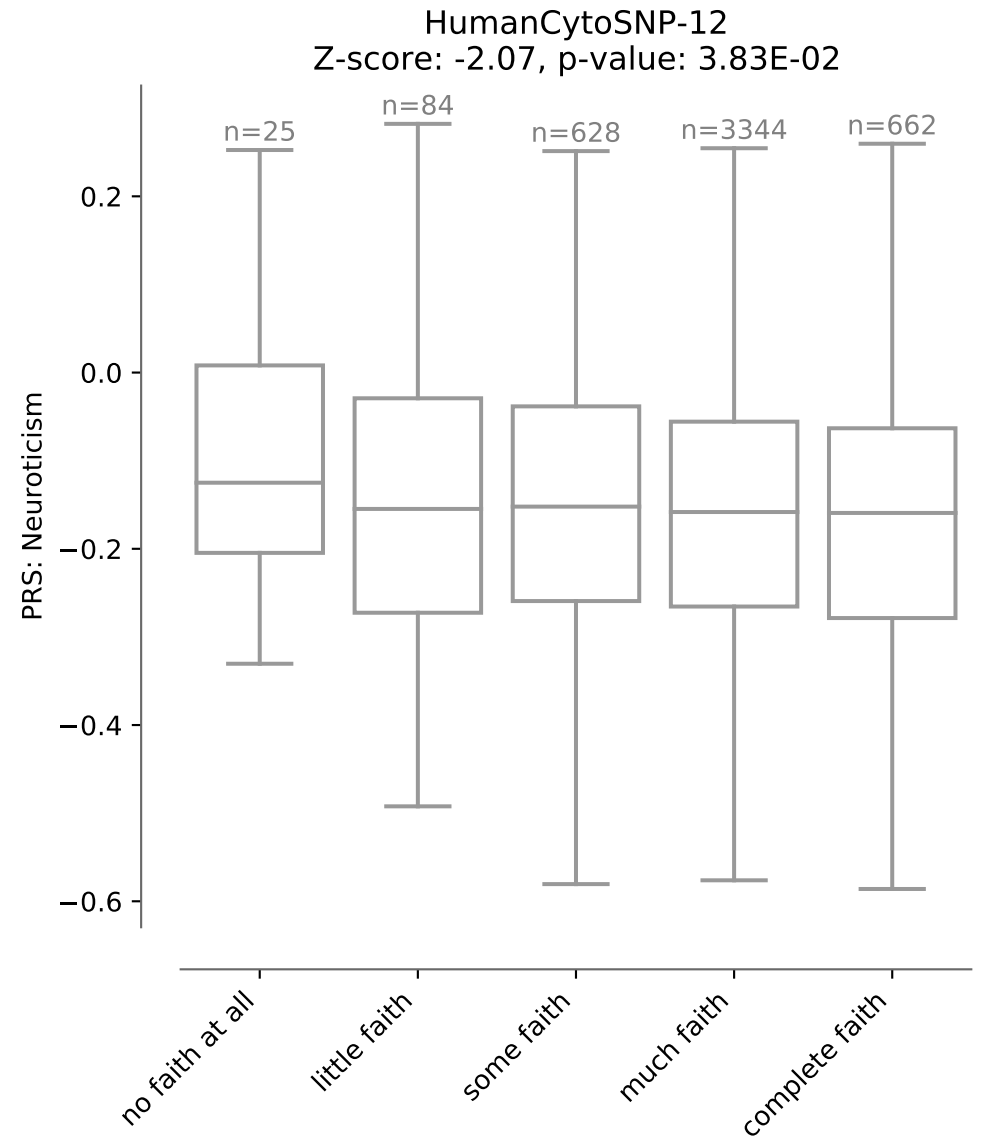

Having faith in the response of the government to COVID-19

Wish be in control of a situation  
PGS: General risk tolerance  
Meta analysis Z-score: 5.10, p-value: 3.32E-07

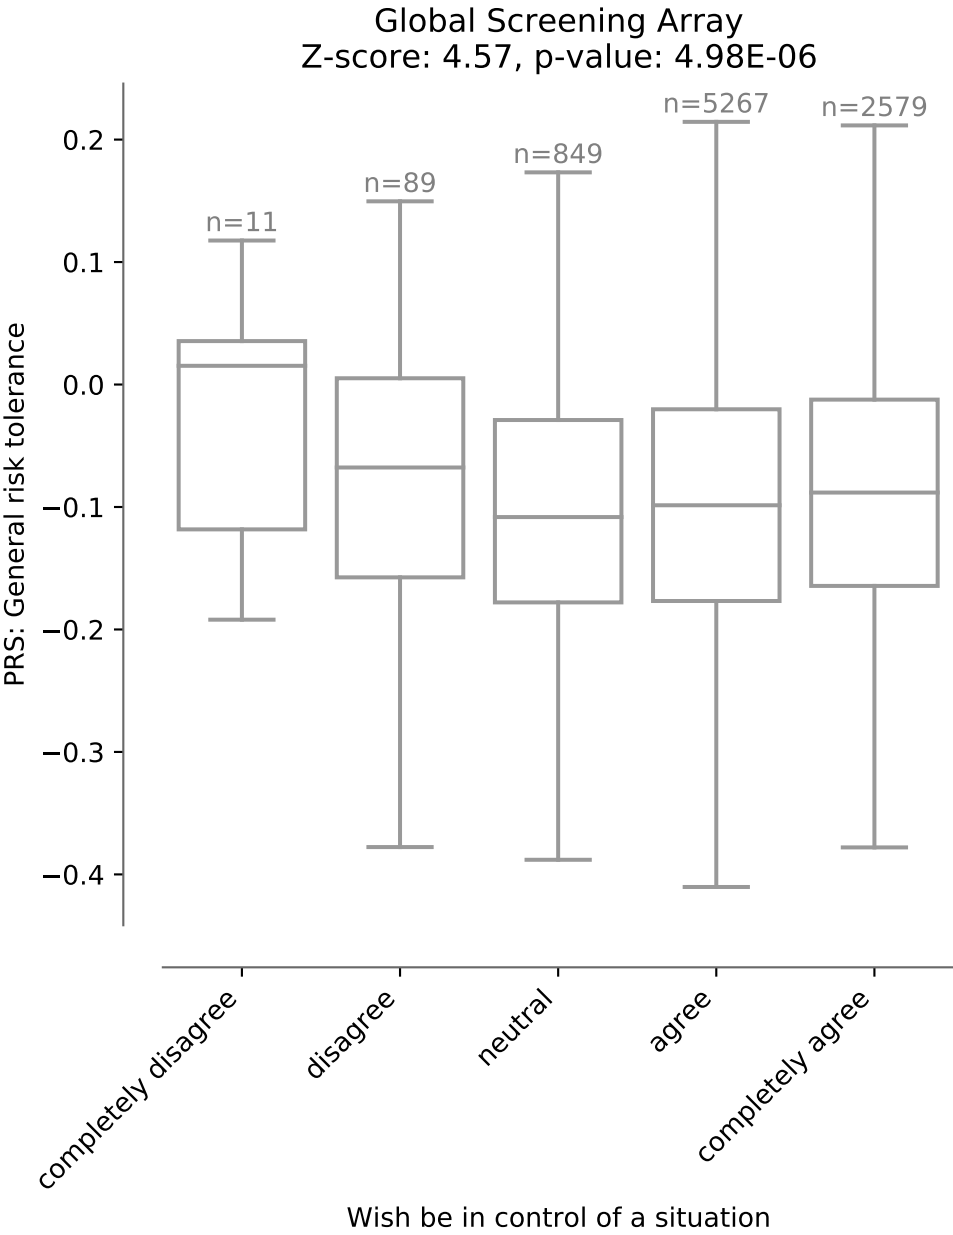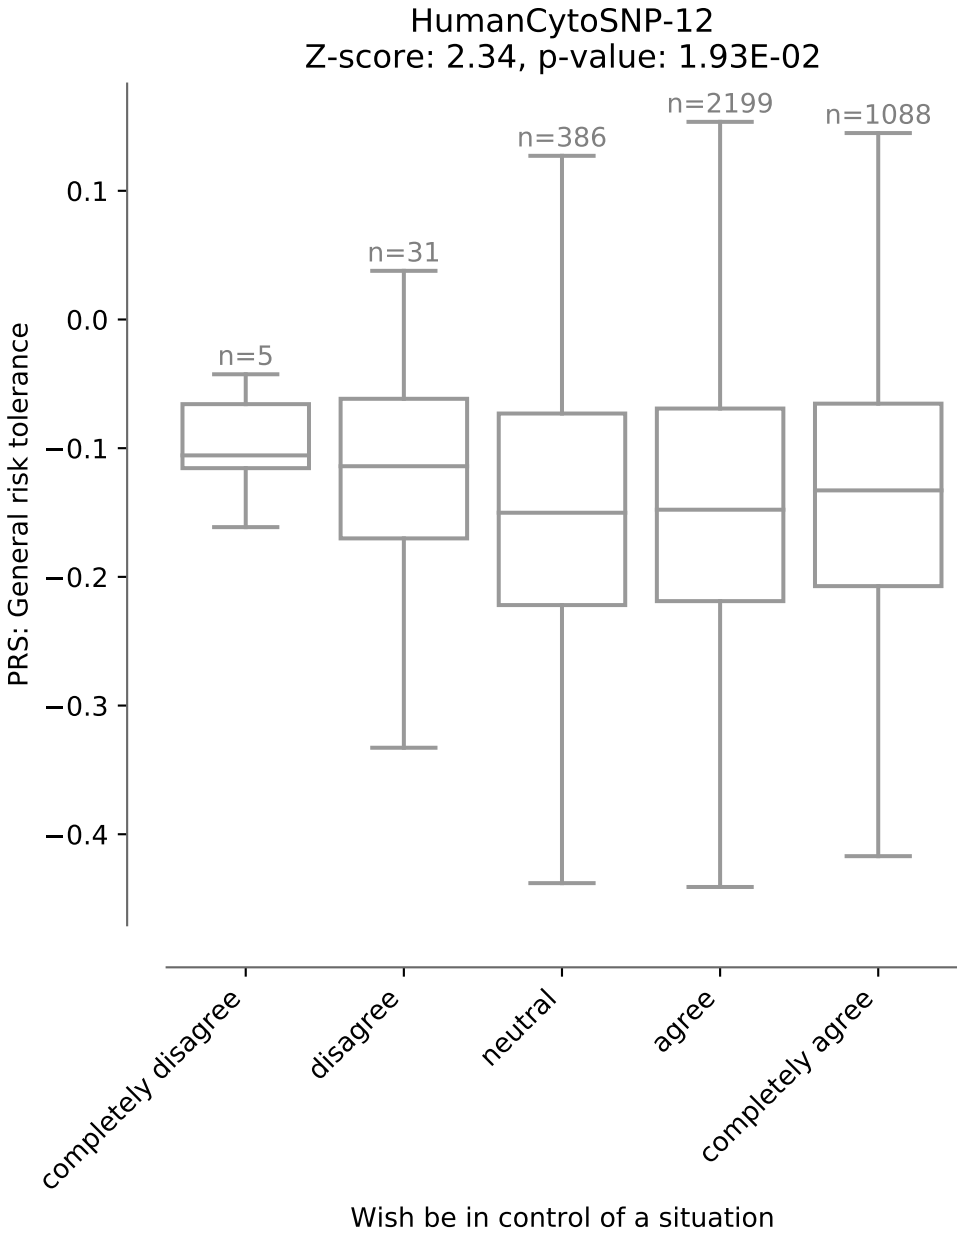

Worried about there being a shortage of medication

PGS: BMI

Meta analysis Z-score: 4.47, p-value: 7.91E-06

Global Screening Array  
Z-score: 3.38, p-value: 7.35E-04

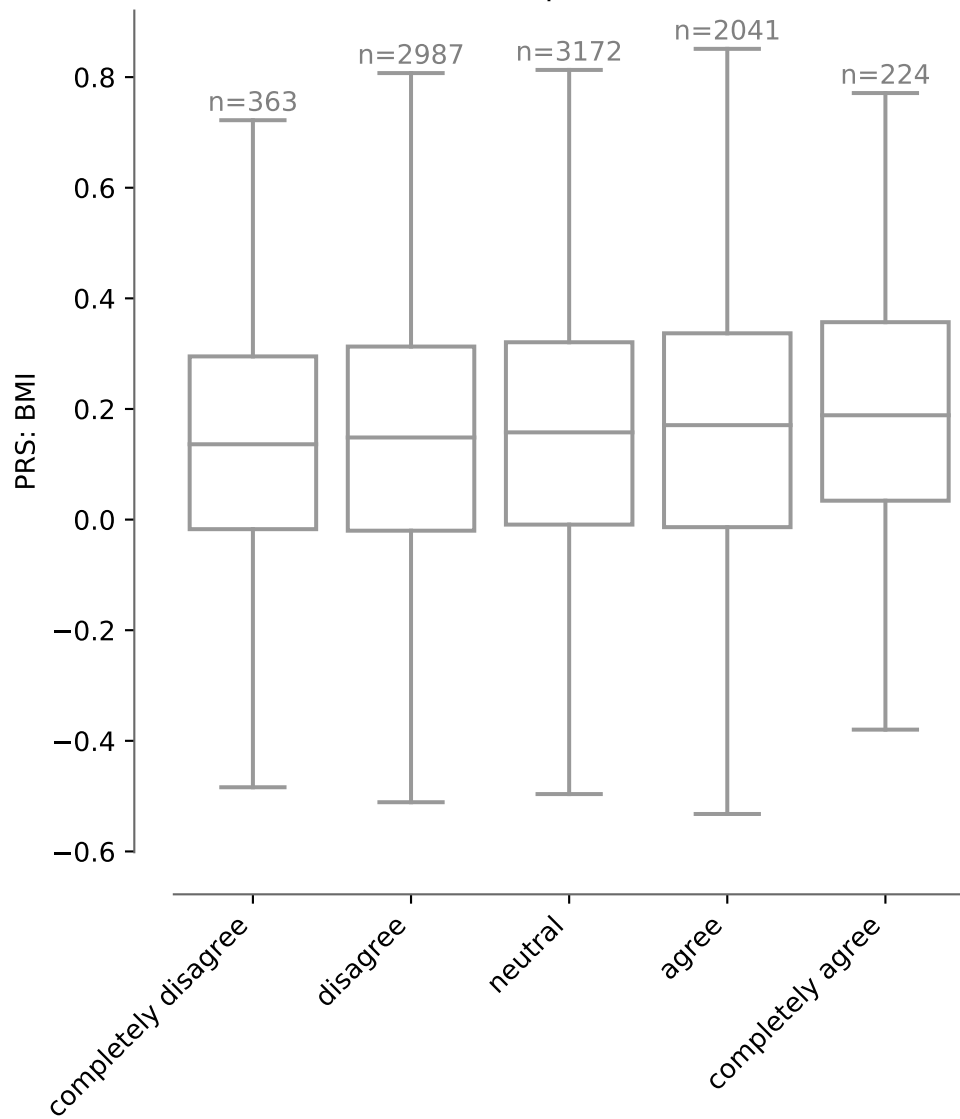

Worried about there being a shortage of medication

HumanCytoSNP-12  
Z-score: 3.01, p-value: 2.65E-03

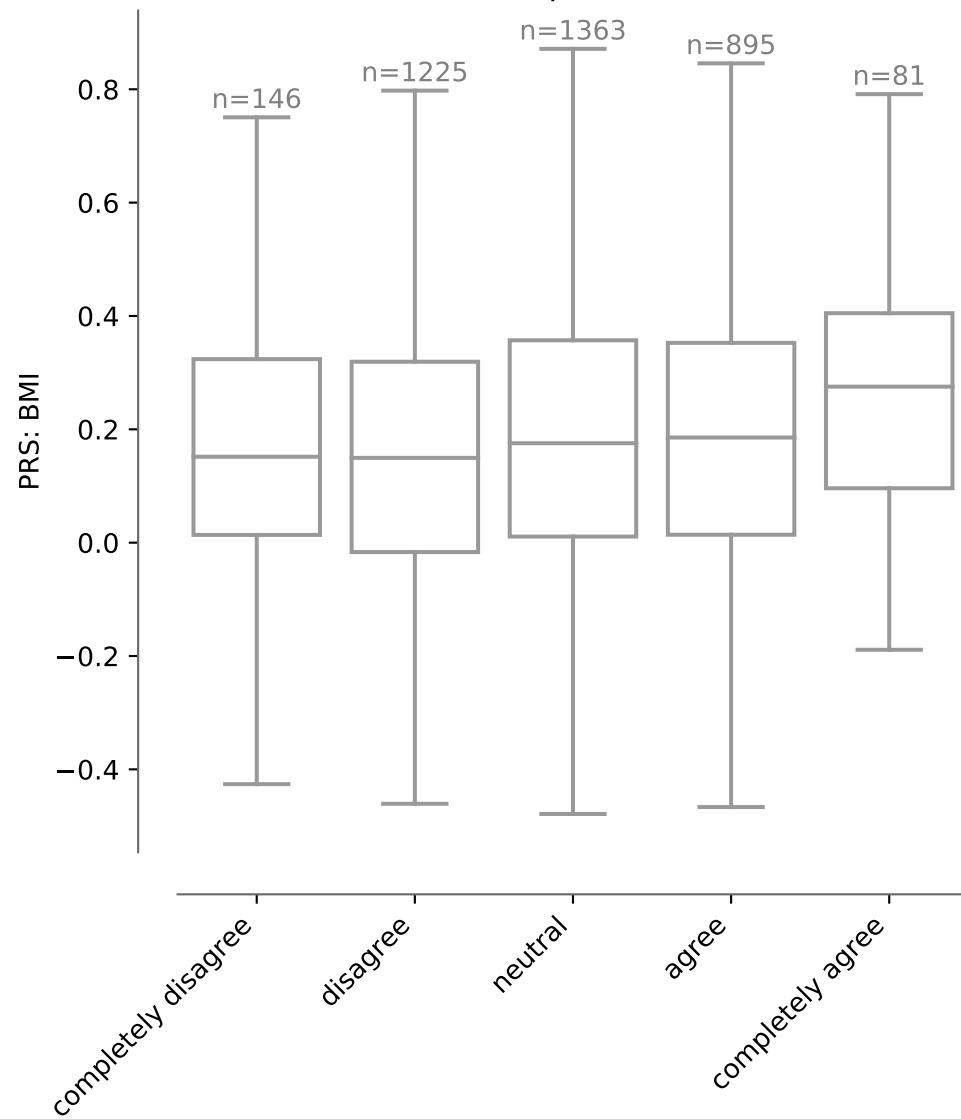

Worried about there being a shortage of medication

Worried about there being a shortage of medication  
PGS: Educational attainment  
Meta analysis Z-score: -5.61, p-value: 2.03E-08

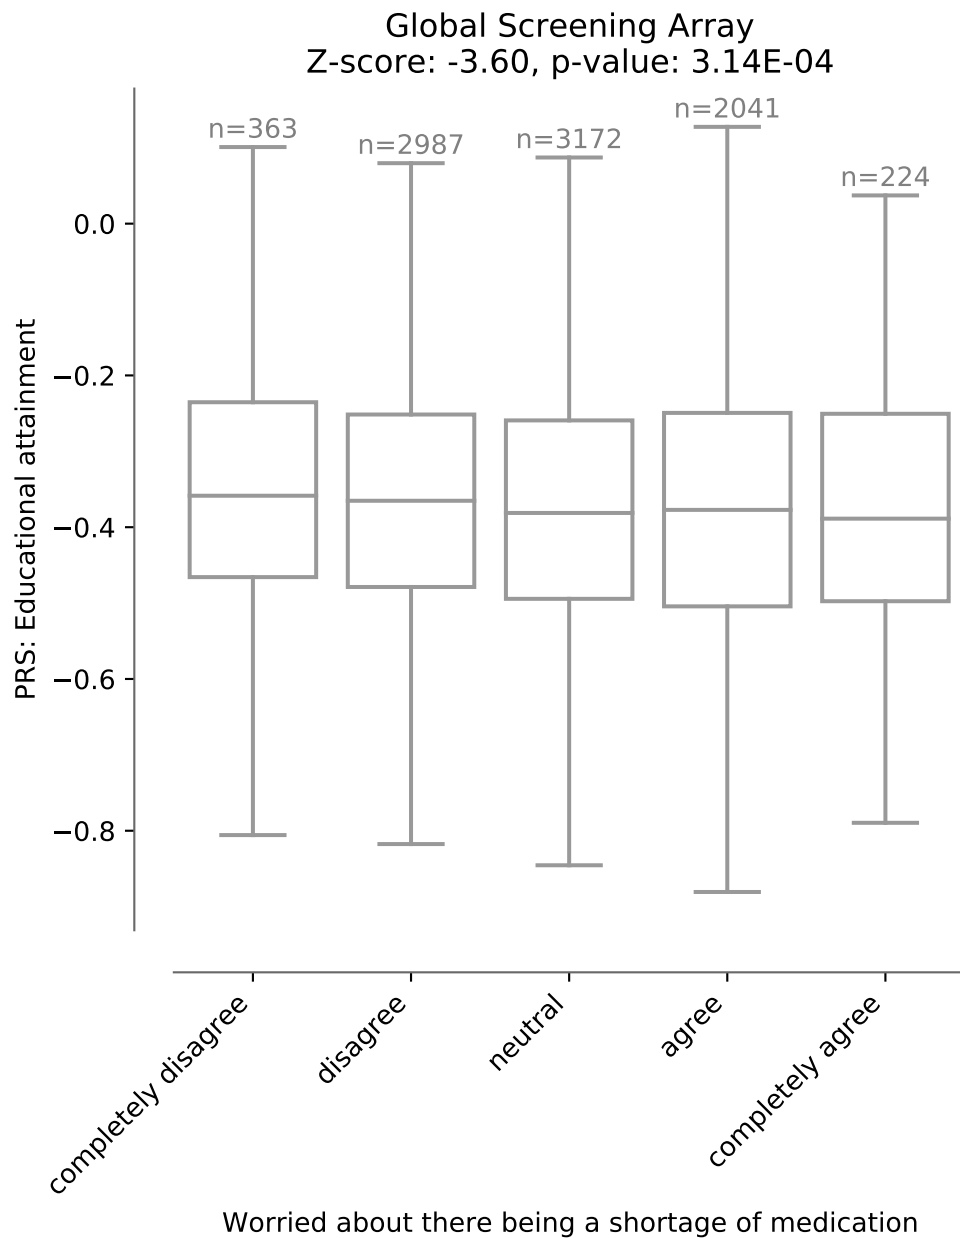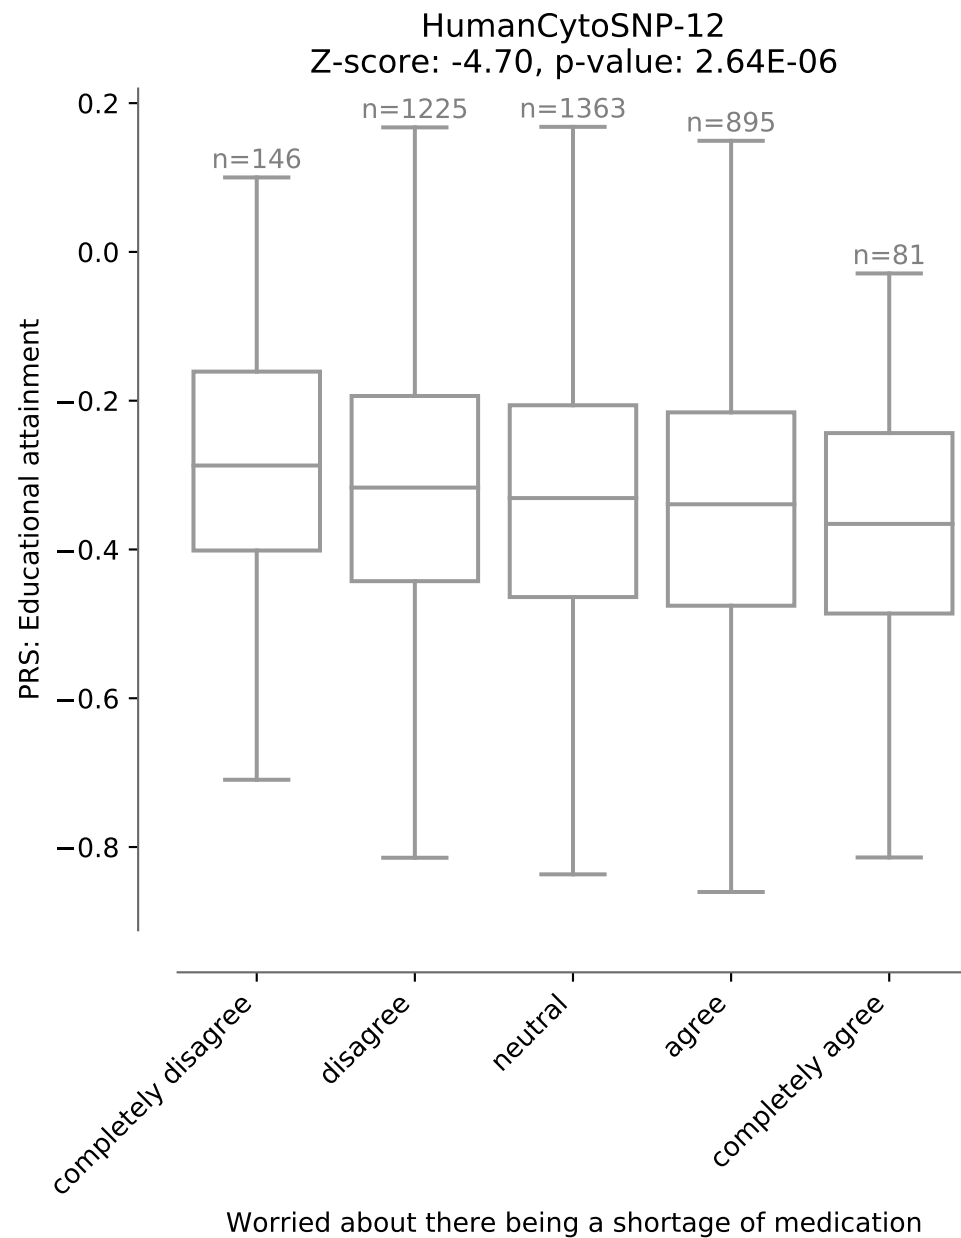

Worried about long duration before life returns to normal  
PGS: Life satisfaction  
Meta analysis Z-score: -4.79, p-value: 1.70E-06

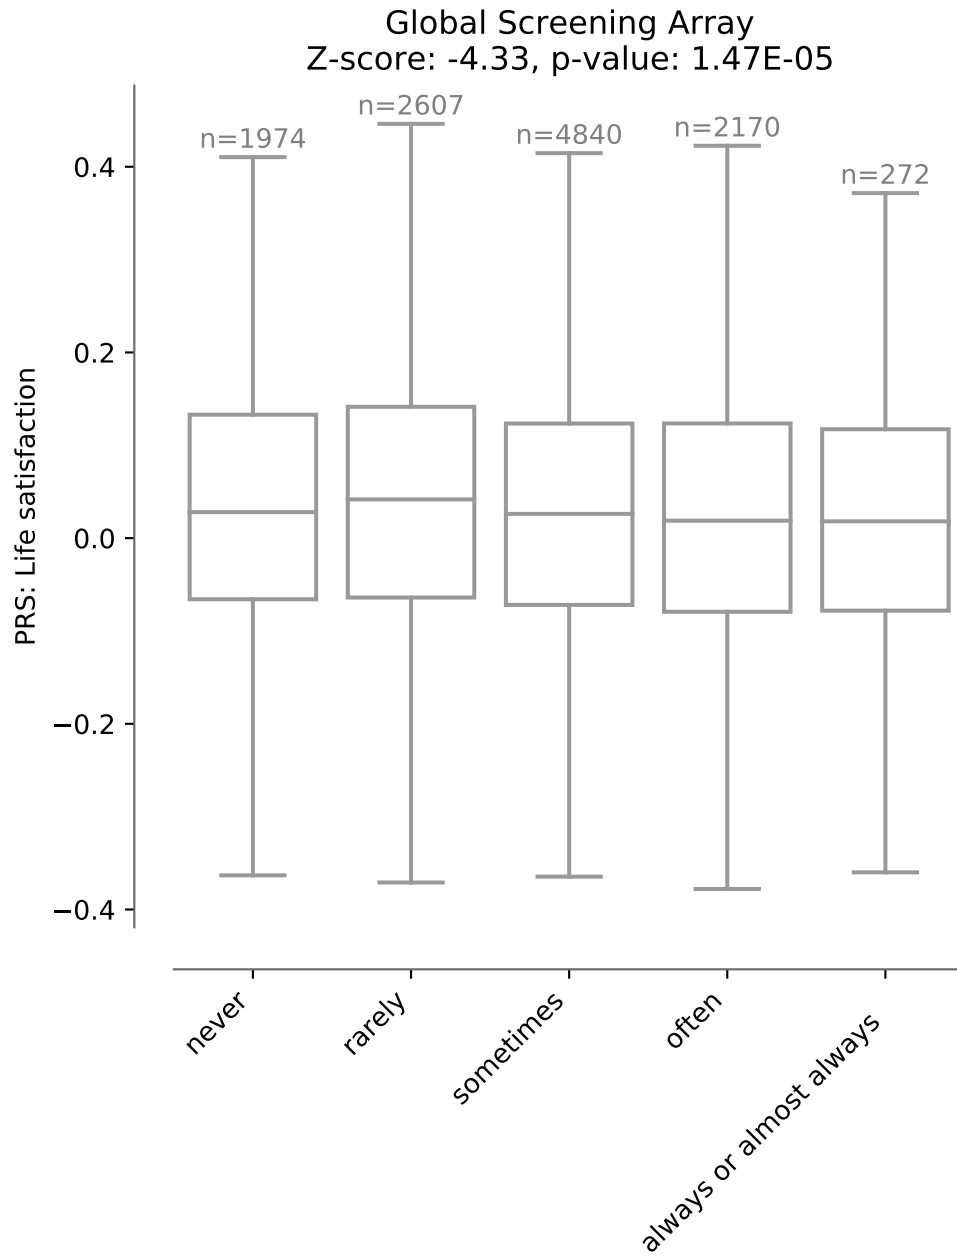

Worried about long duration before life returns to normal

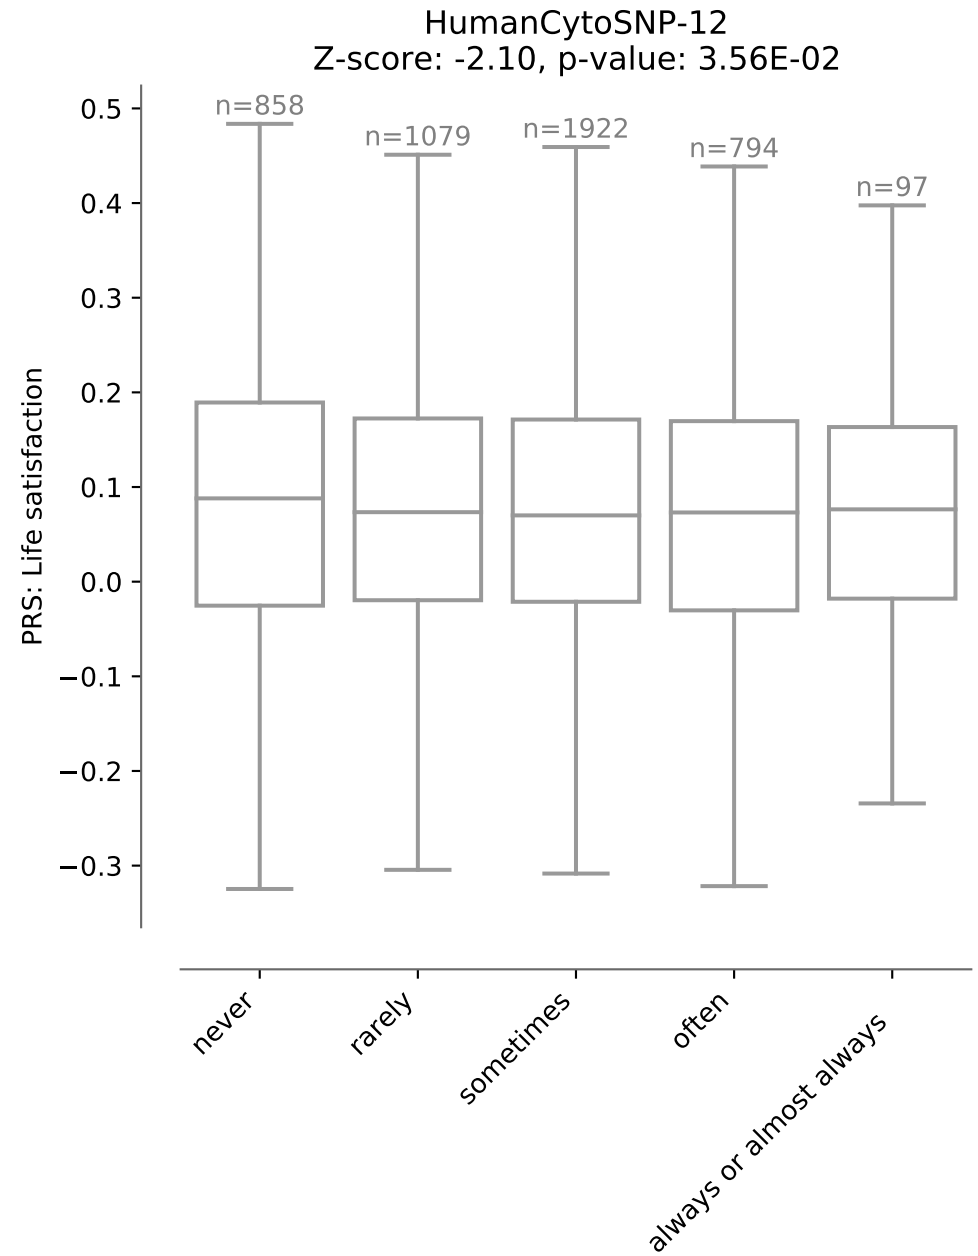

Worried about long duration before life returns to normal

Worried about long duration before life returns to normal  
PGS: Neuroticism  
Meta analysis Z-score: 6.17, p-value: 6.71E-10

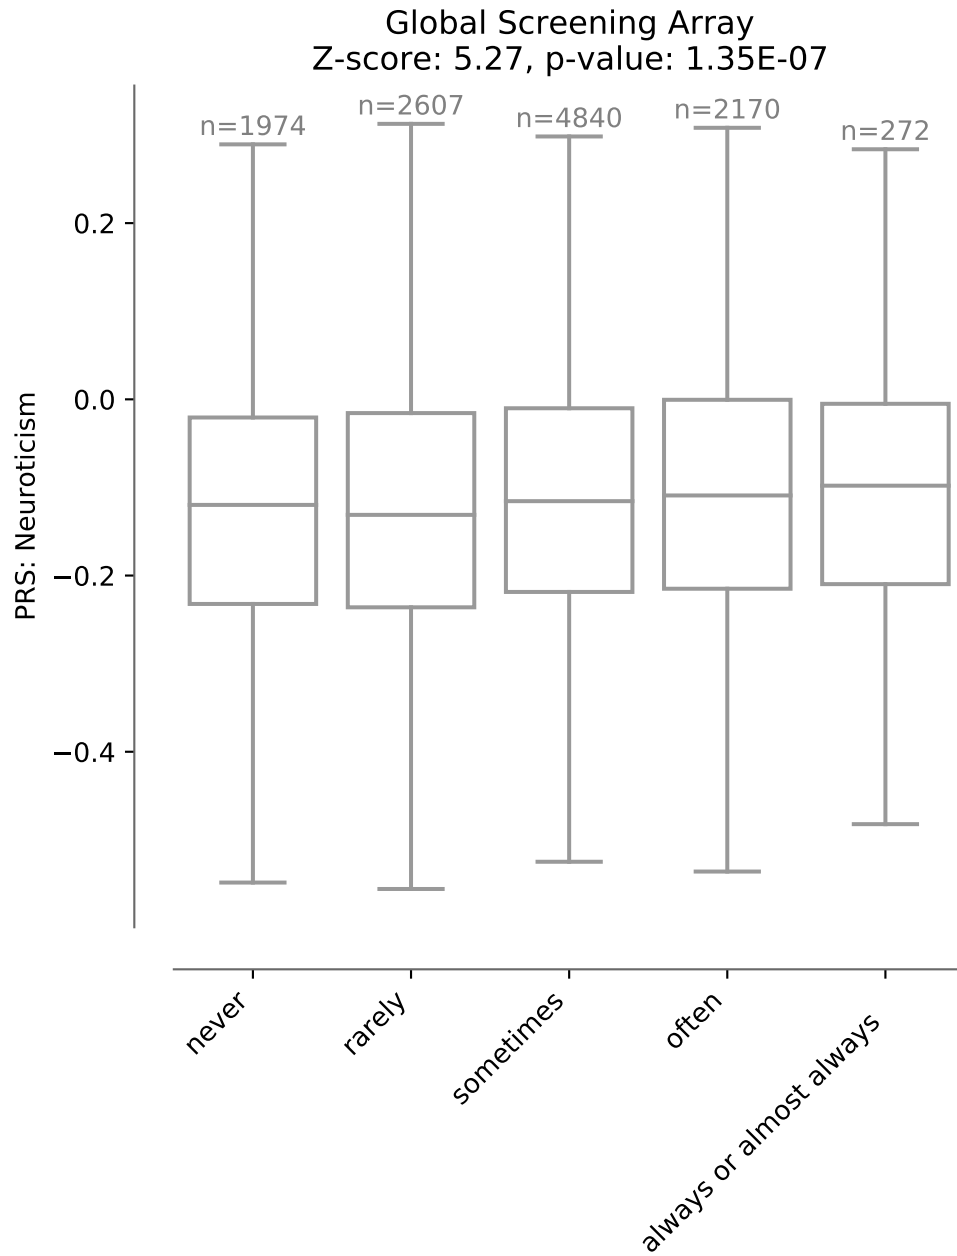

Worried about long duration before life returns to normal

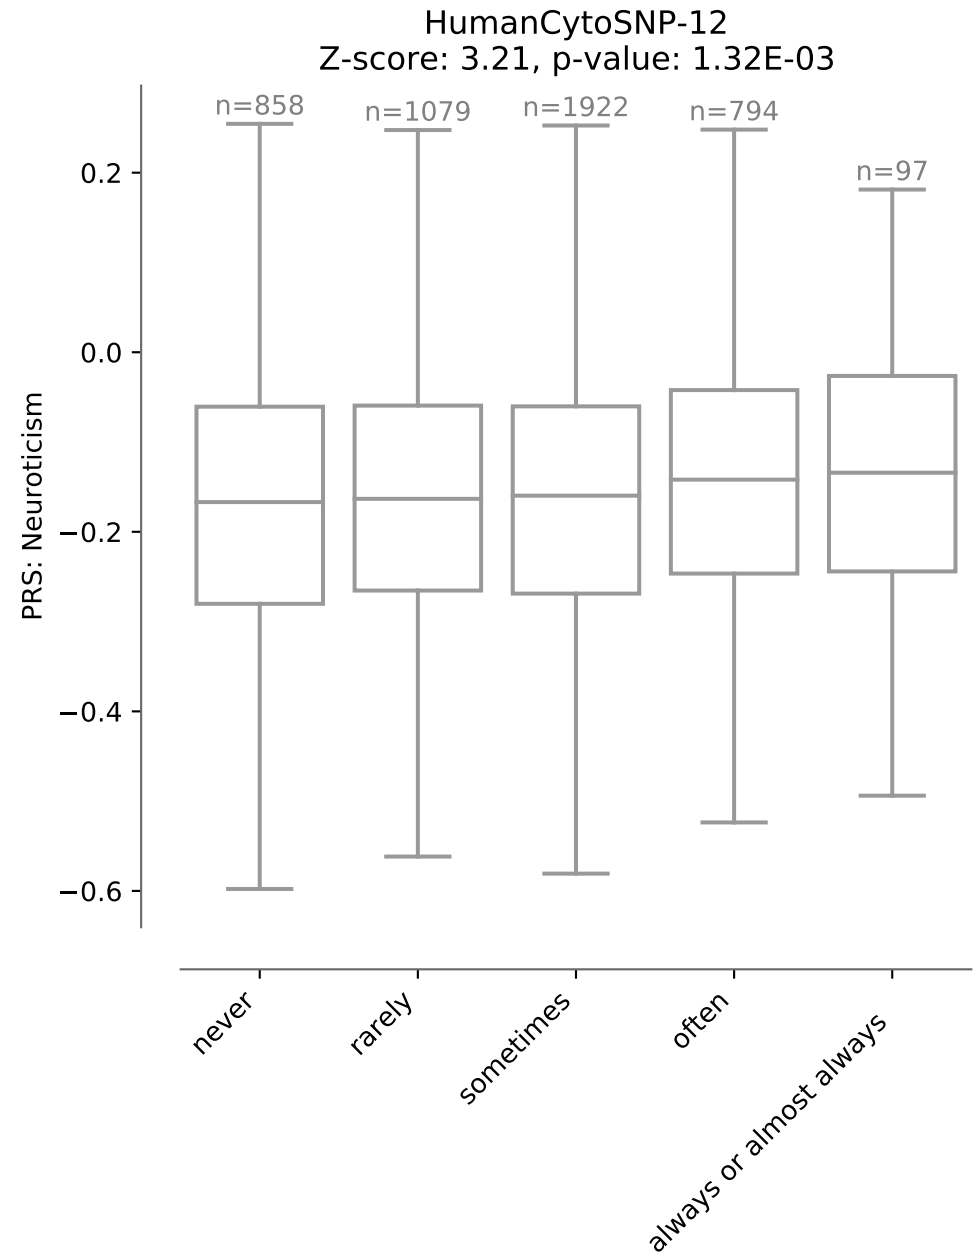

Worried about long duration before life returns to normal

Worried about someone close getting sick  
PGS: Life satisfaction  
Meta analysis Z-score: -4.91, p-value: 9.11E-07

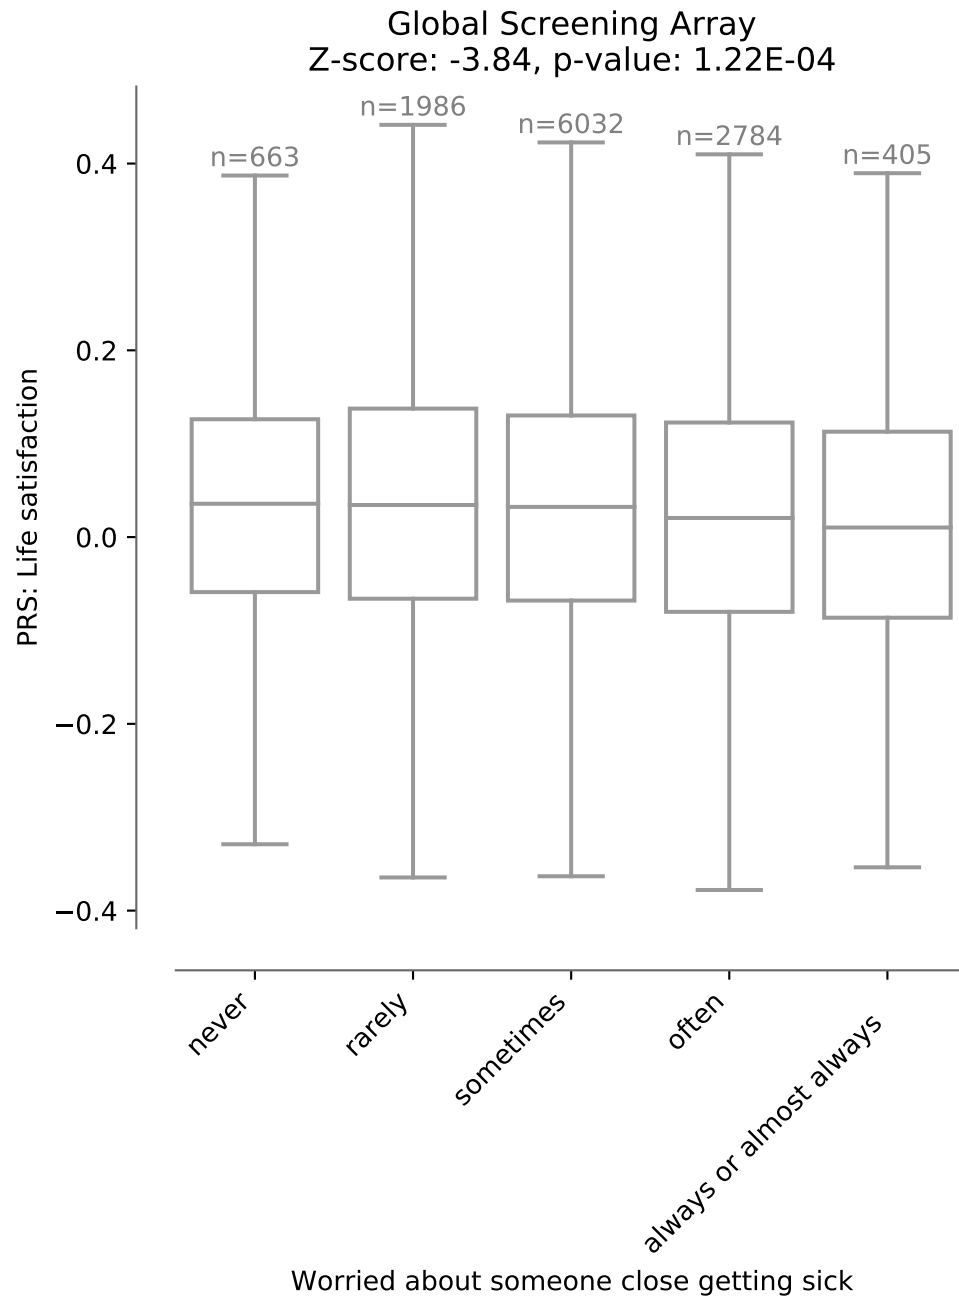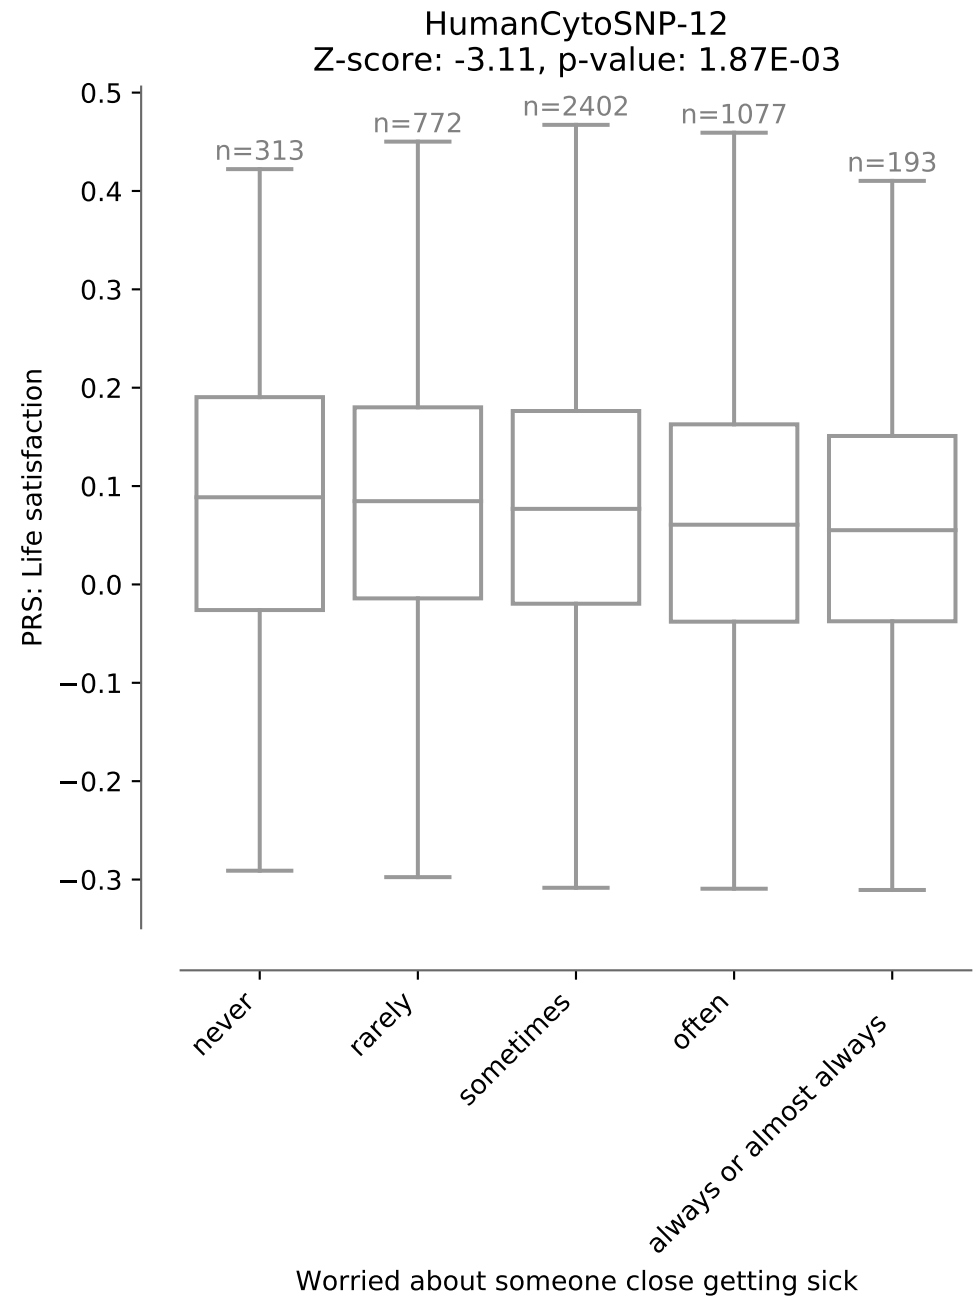



Worried about someone close getting sick  
PGS: Neuroticism  
Meta analysis Z-score: 6.59, p-value: 4.37E-11

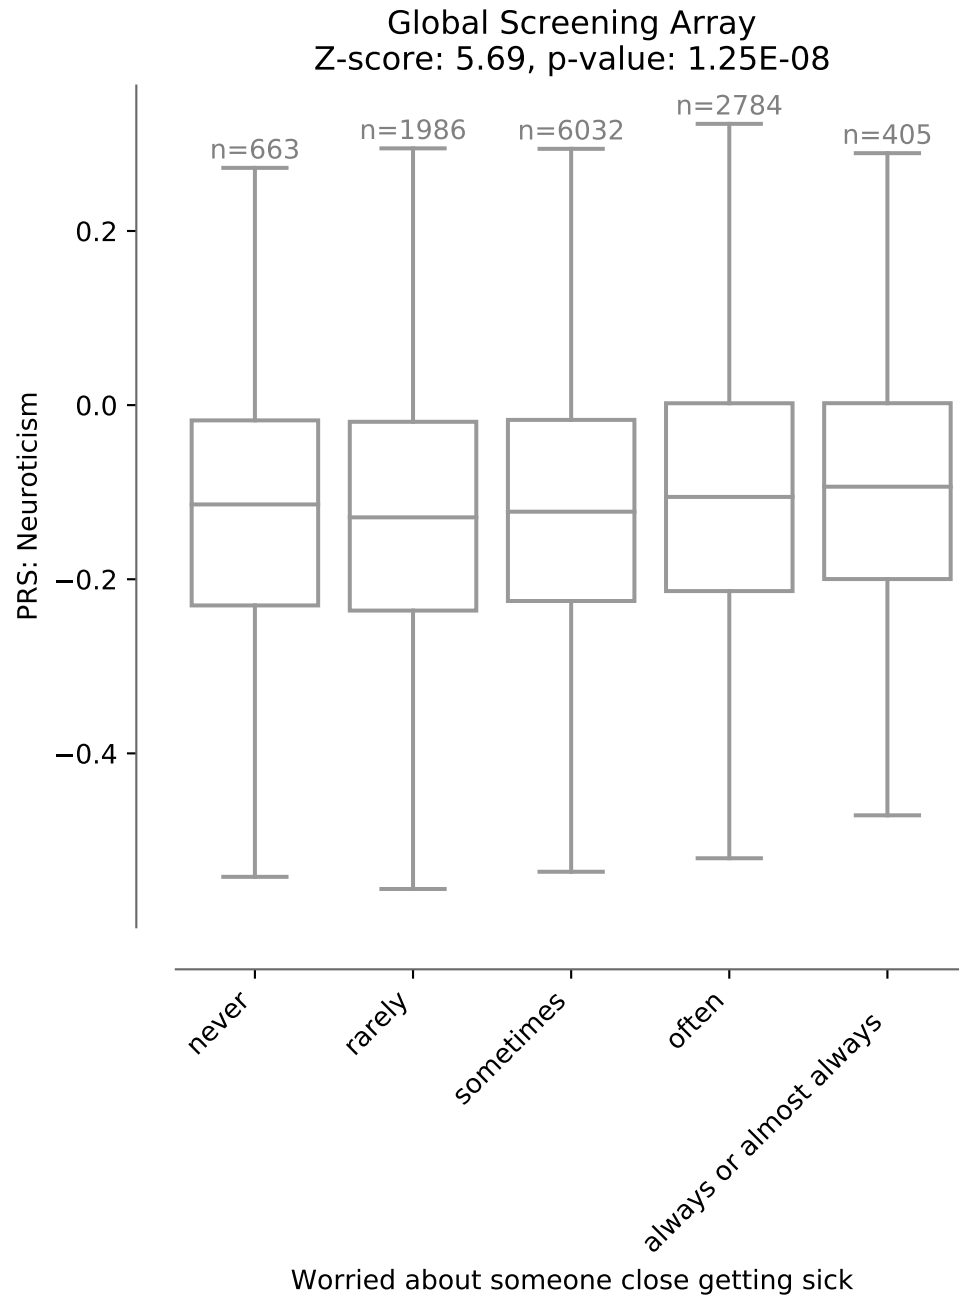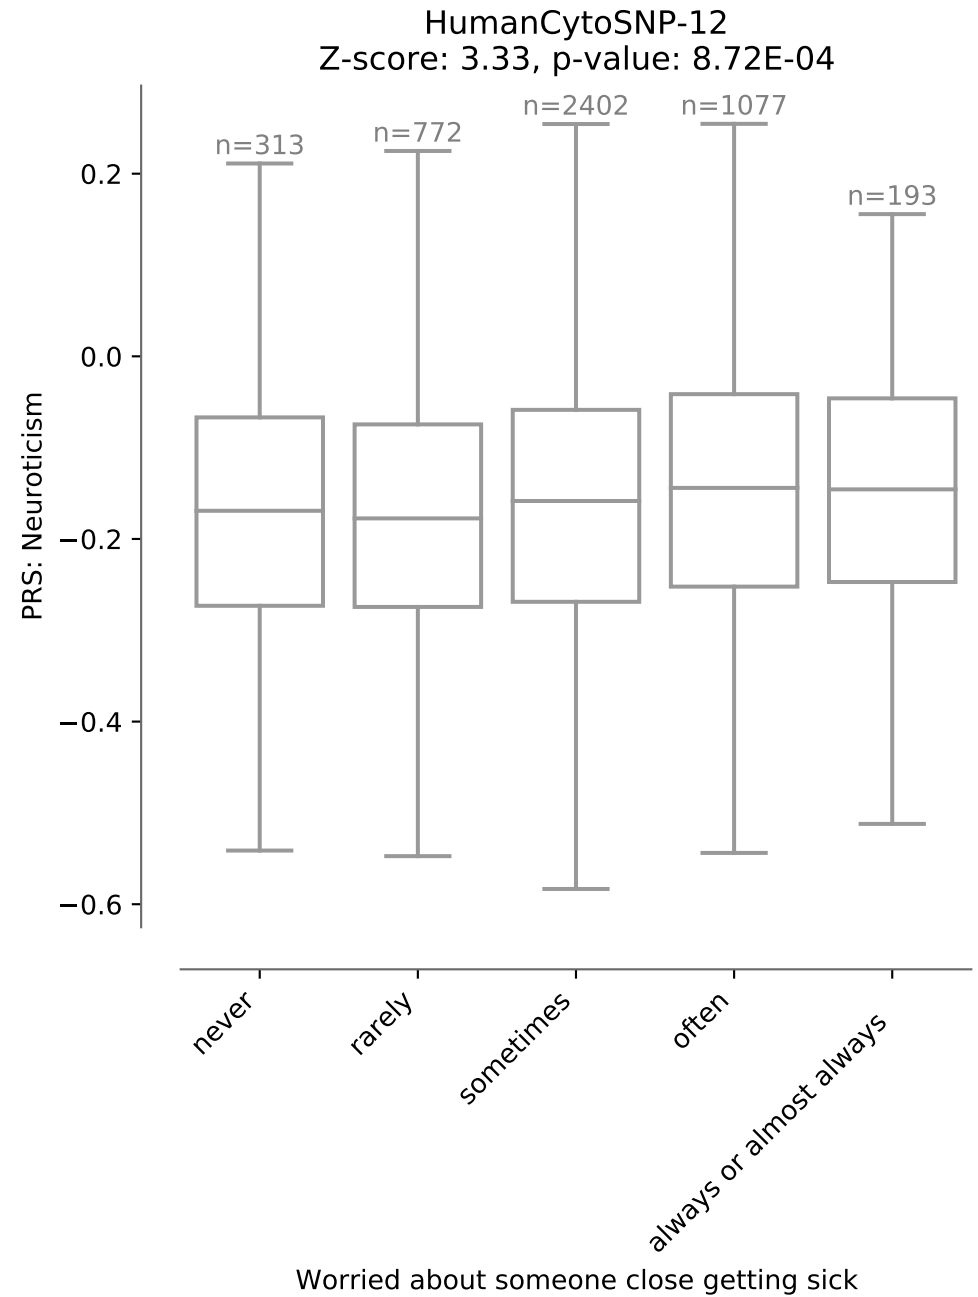

Concerned about not being able to see friends and family  
PGS: Neuroticism  
Meta analysis Z-score: 4.69, p-value: 2.80E-06

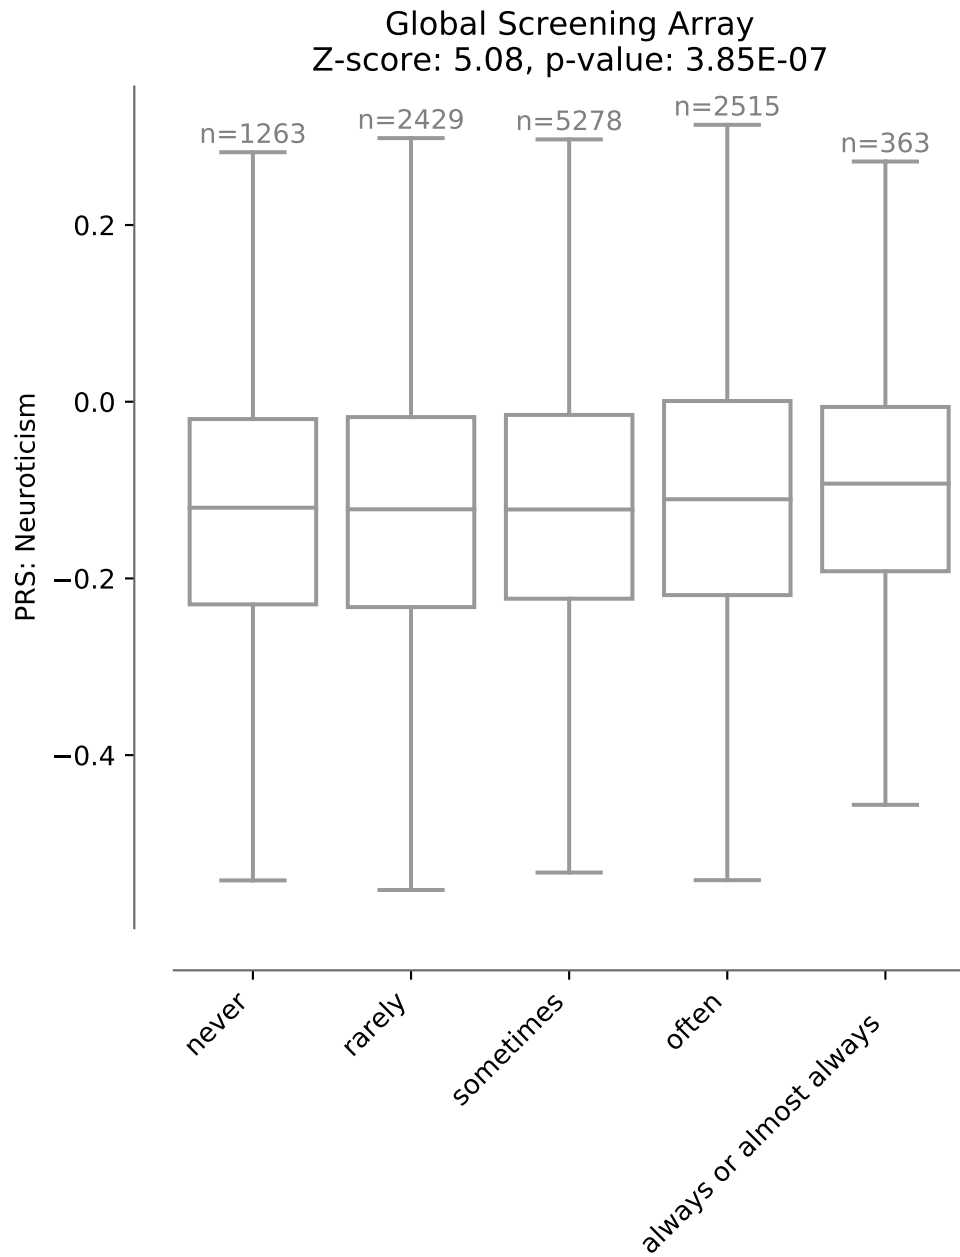

Concerned about not being able to see friends and family

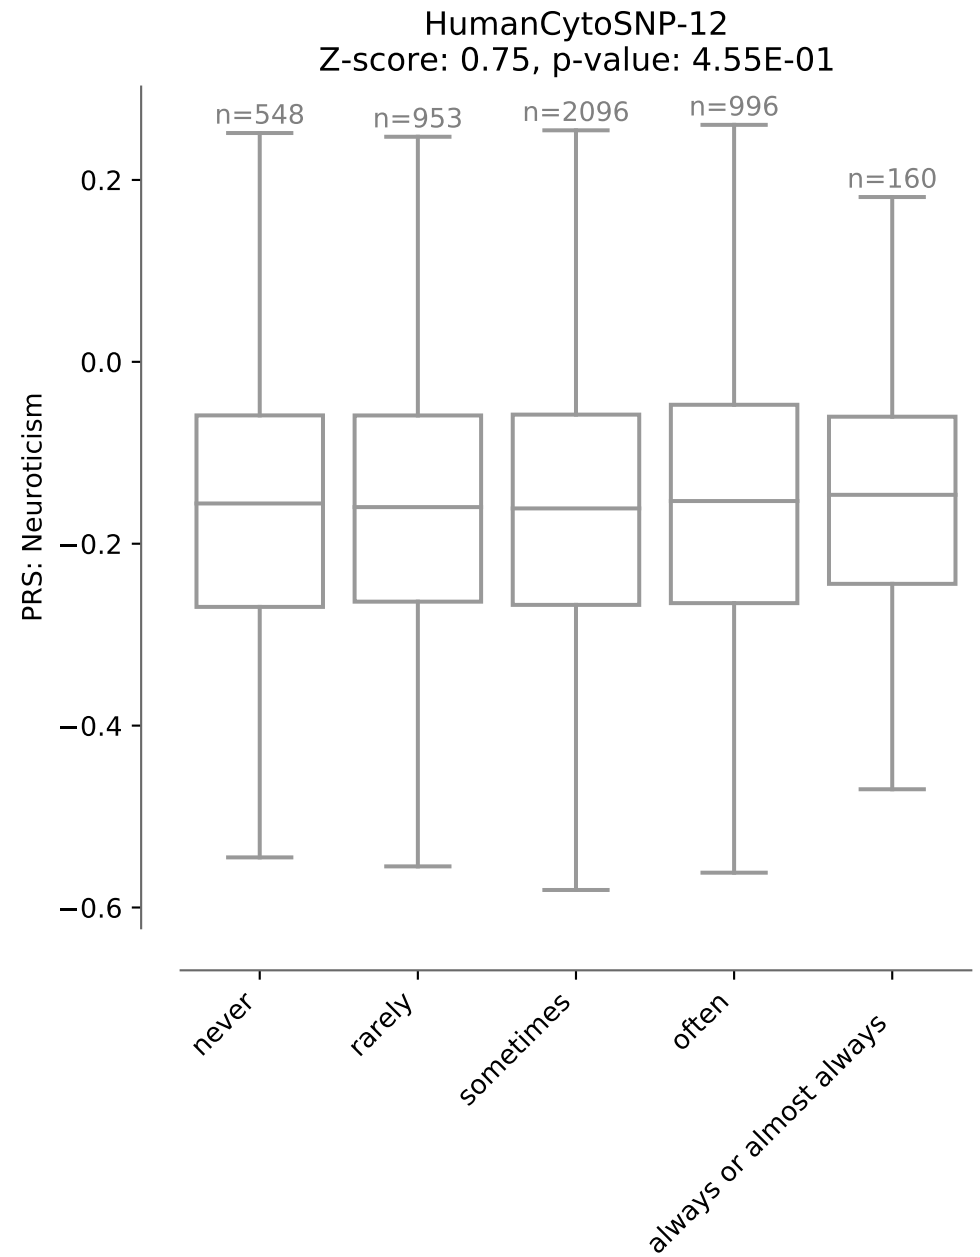

Concerned about not being able to see friends and family

Worried about losing job  
PGS: Neuroticism  
Meta analysis Z-score: 4.51, p-value: 6.55E-06

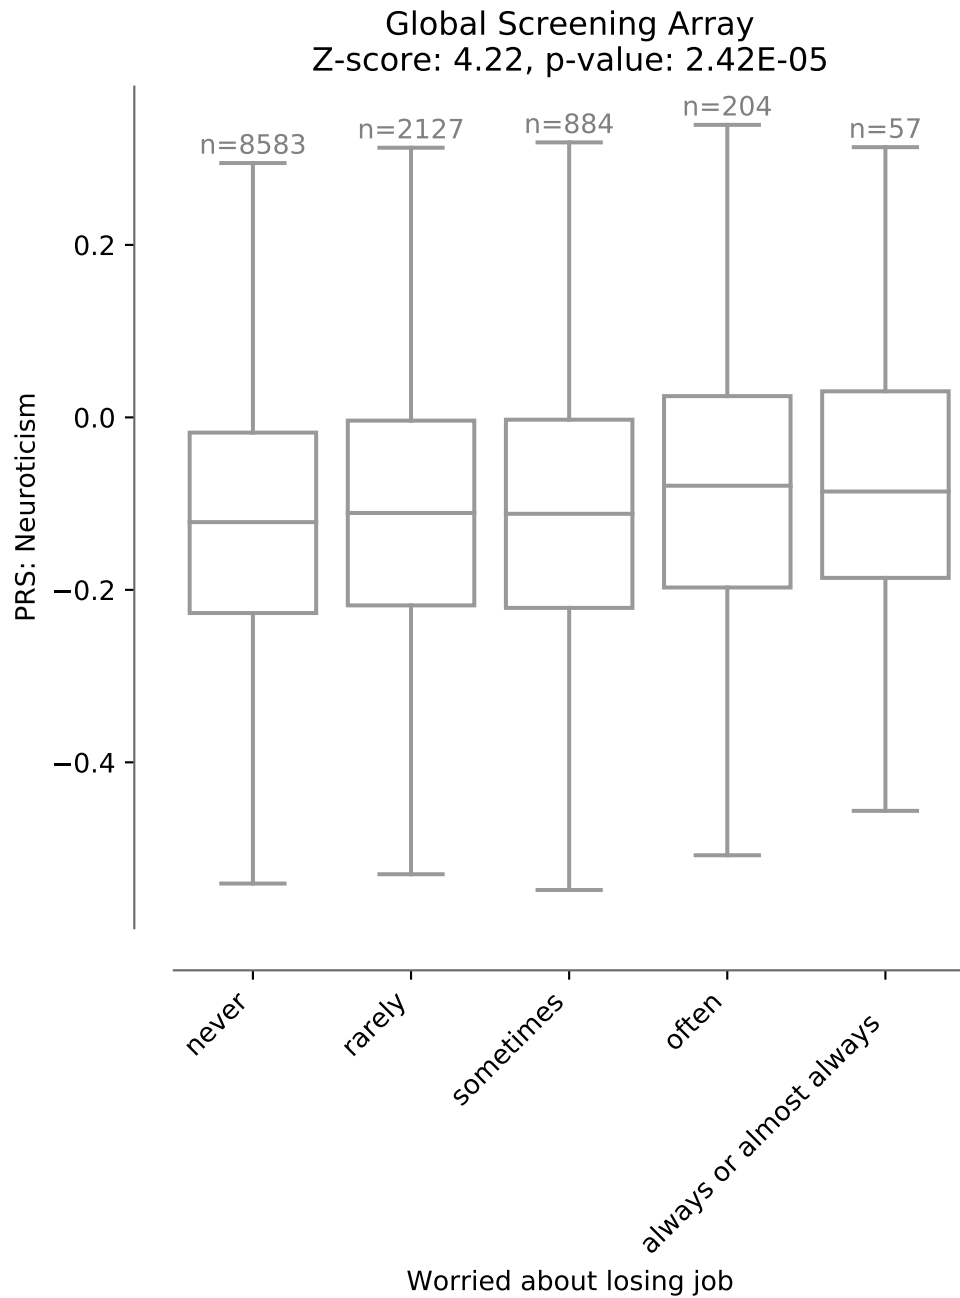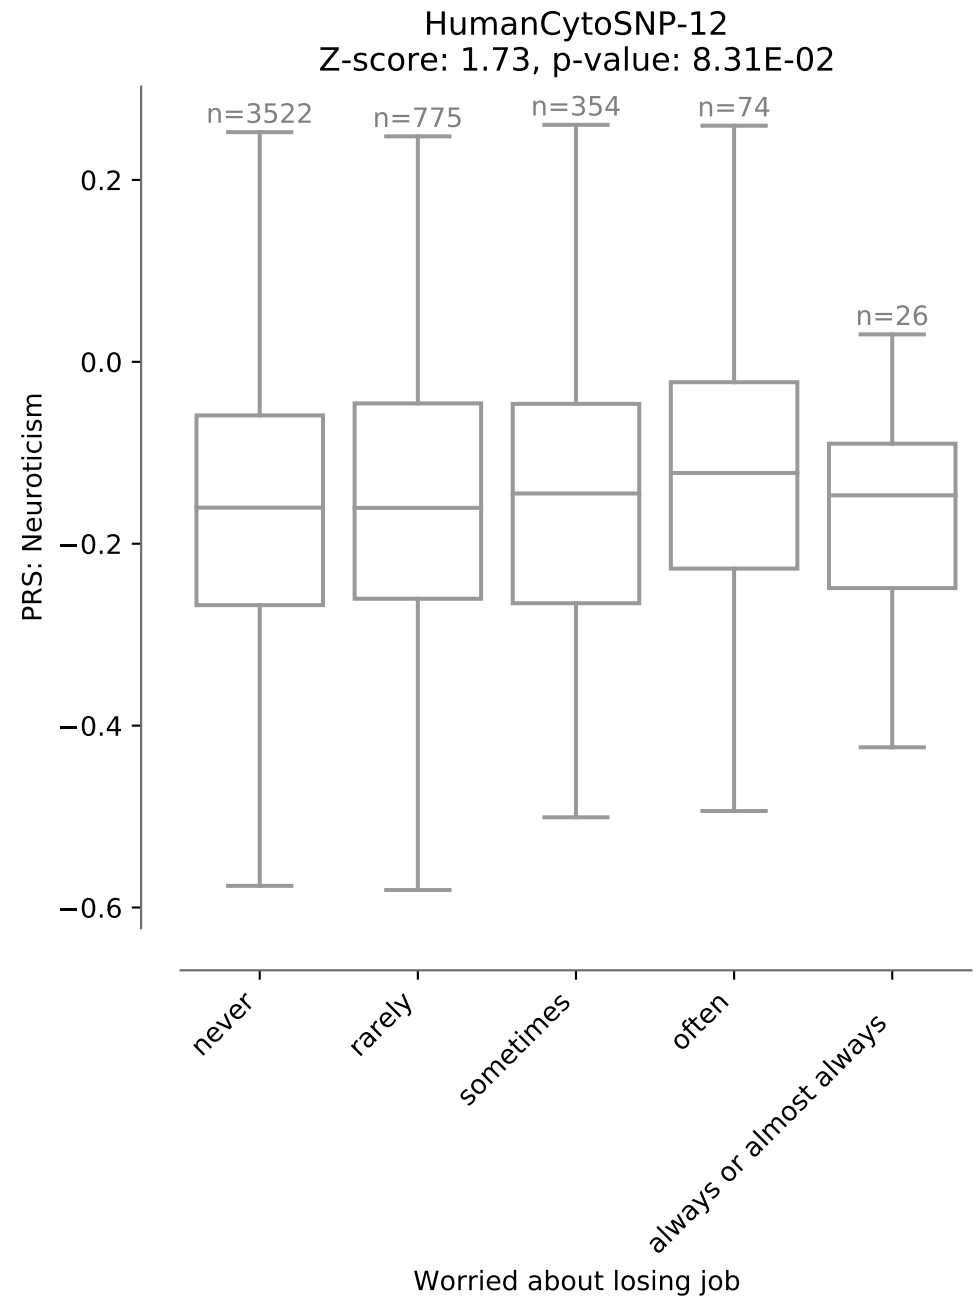

Concerned about financial trouble  
PGS: Life satisfaction  
Meta analysis Z-score: -5.43, p-value: 5.62E-08

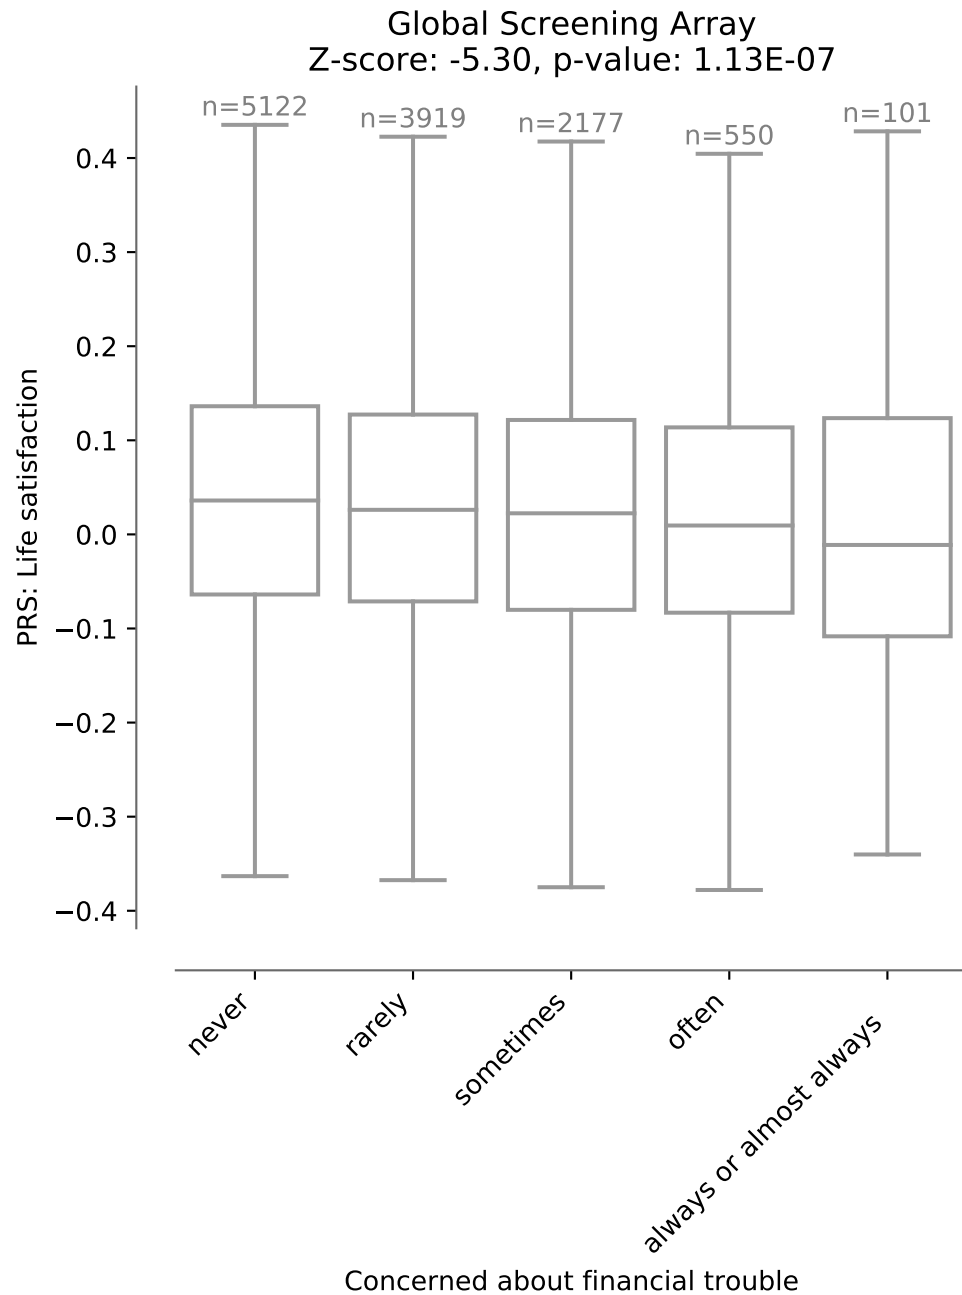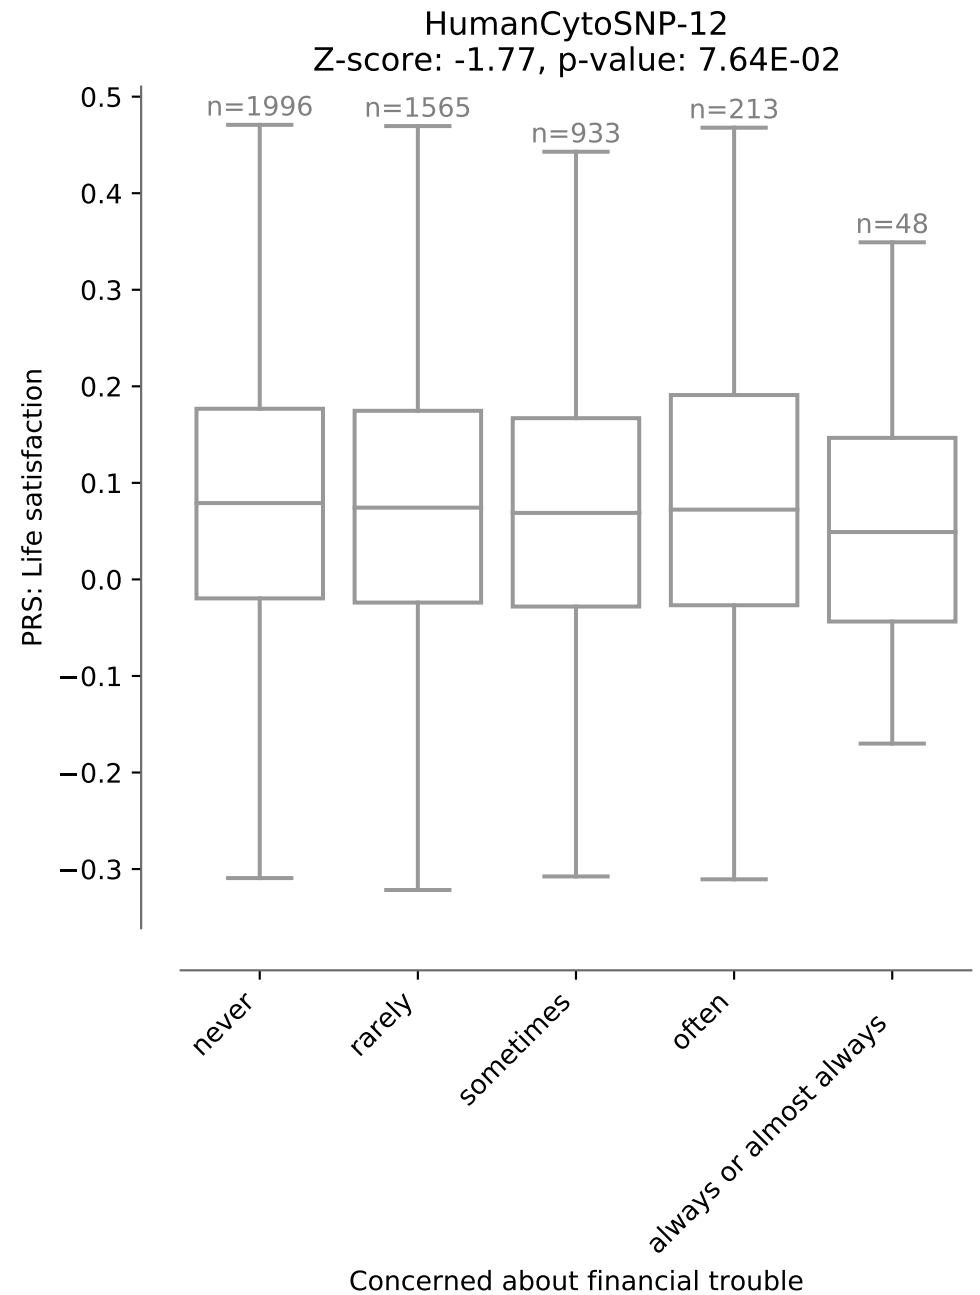

Concerned about financial trouble  
PGS: Neuroticism  
Meta analysis Z-score: 5.80, p-value: 6.45E-09

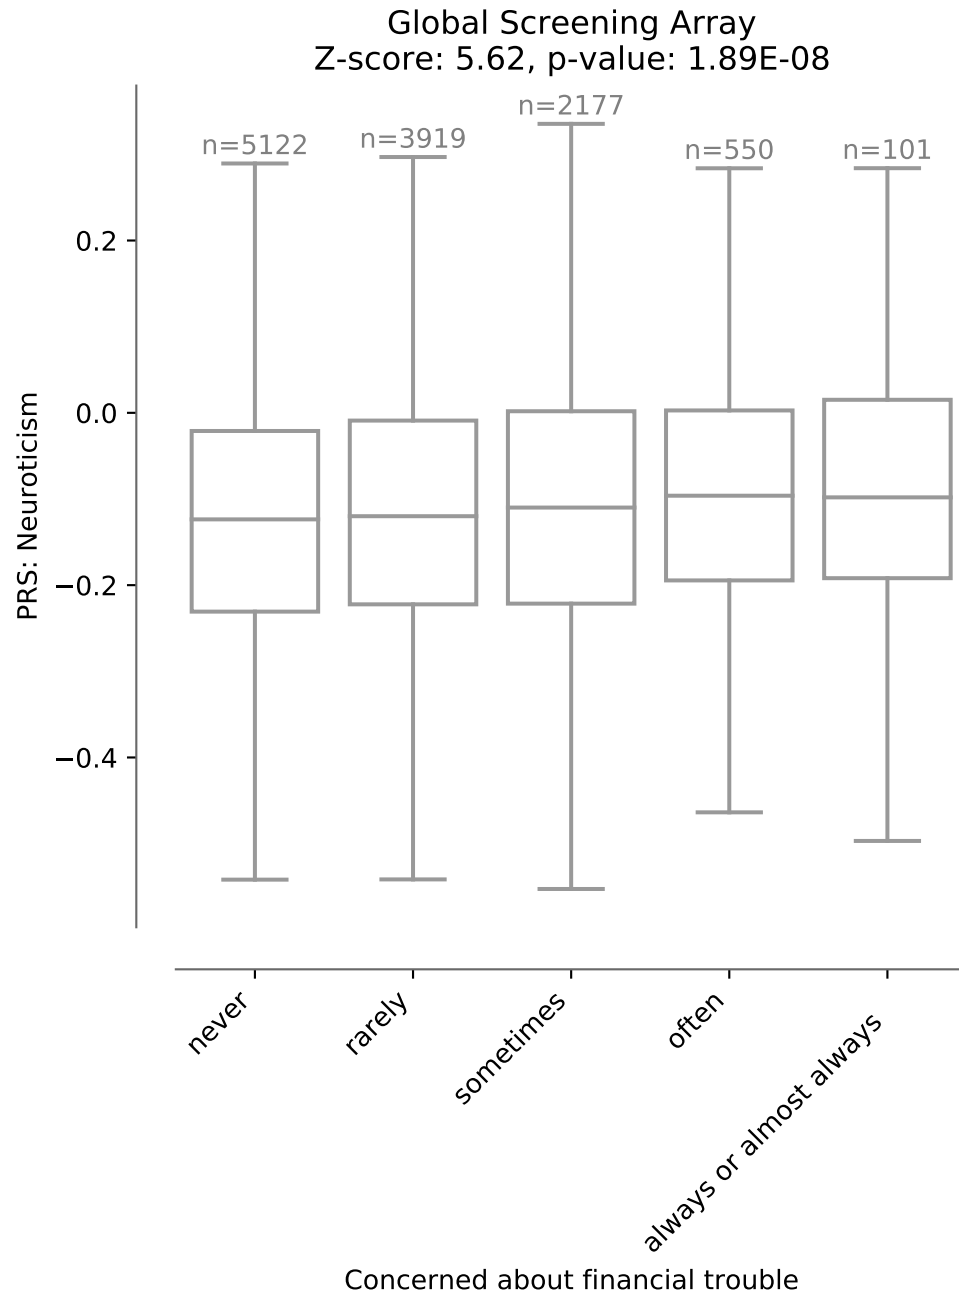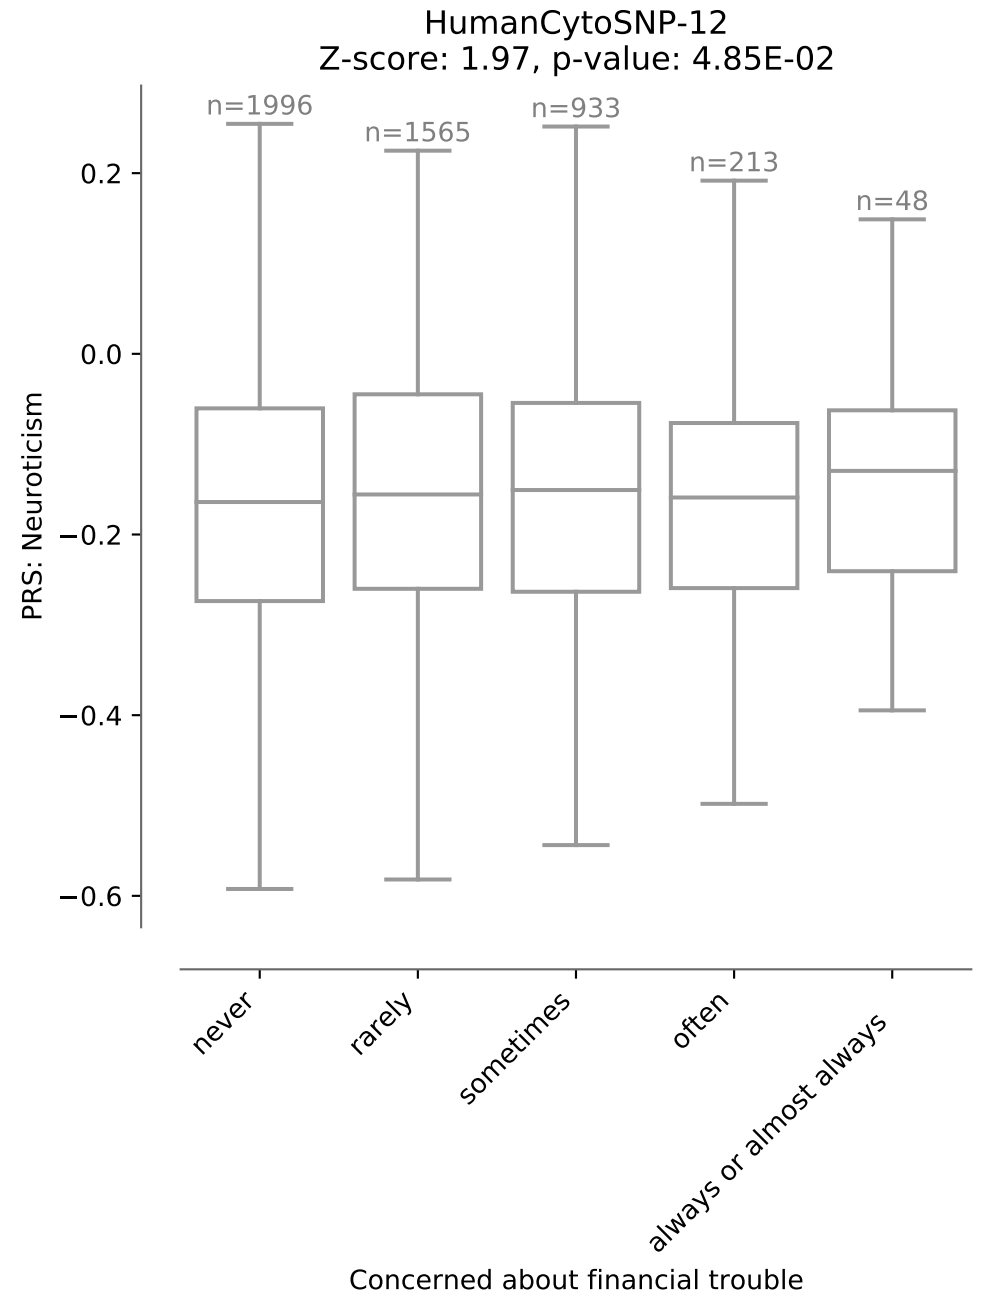

Worry about infecting someone else  
PGS: Life satisfaction  
Meta analysis Z-score: -4.85, p-value: 1.24E-06

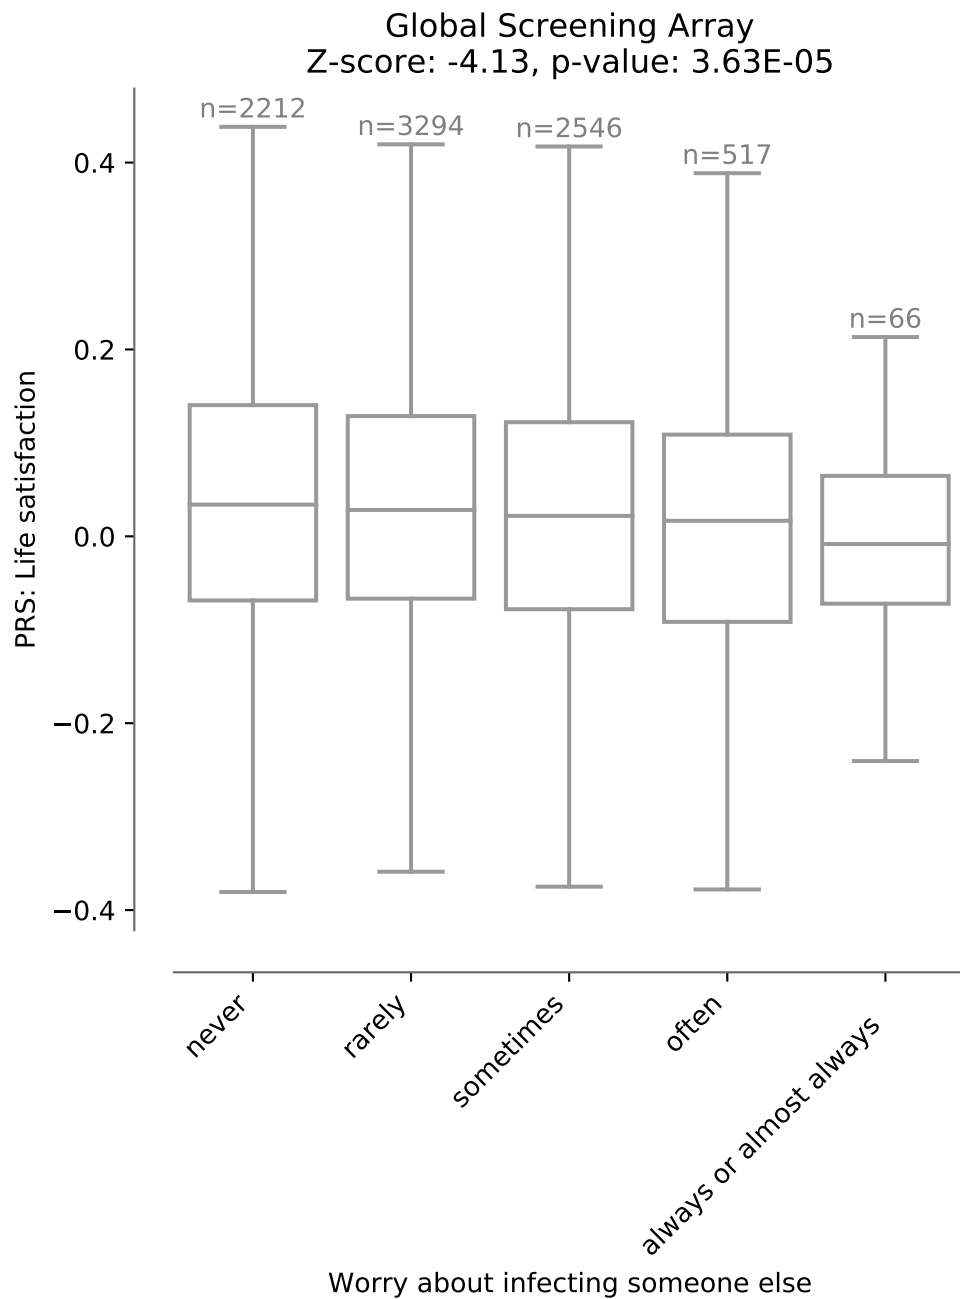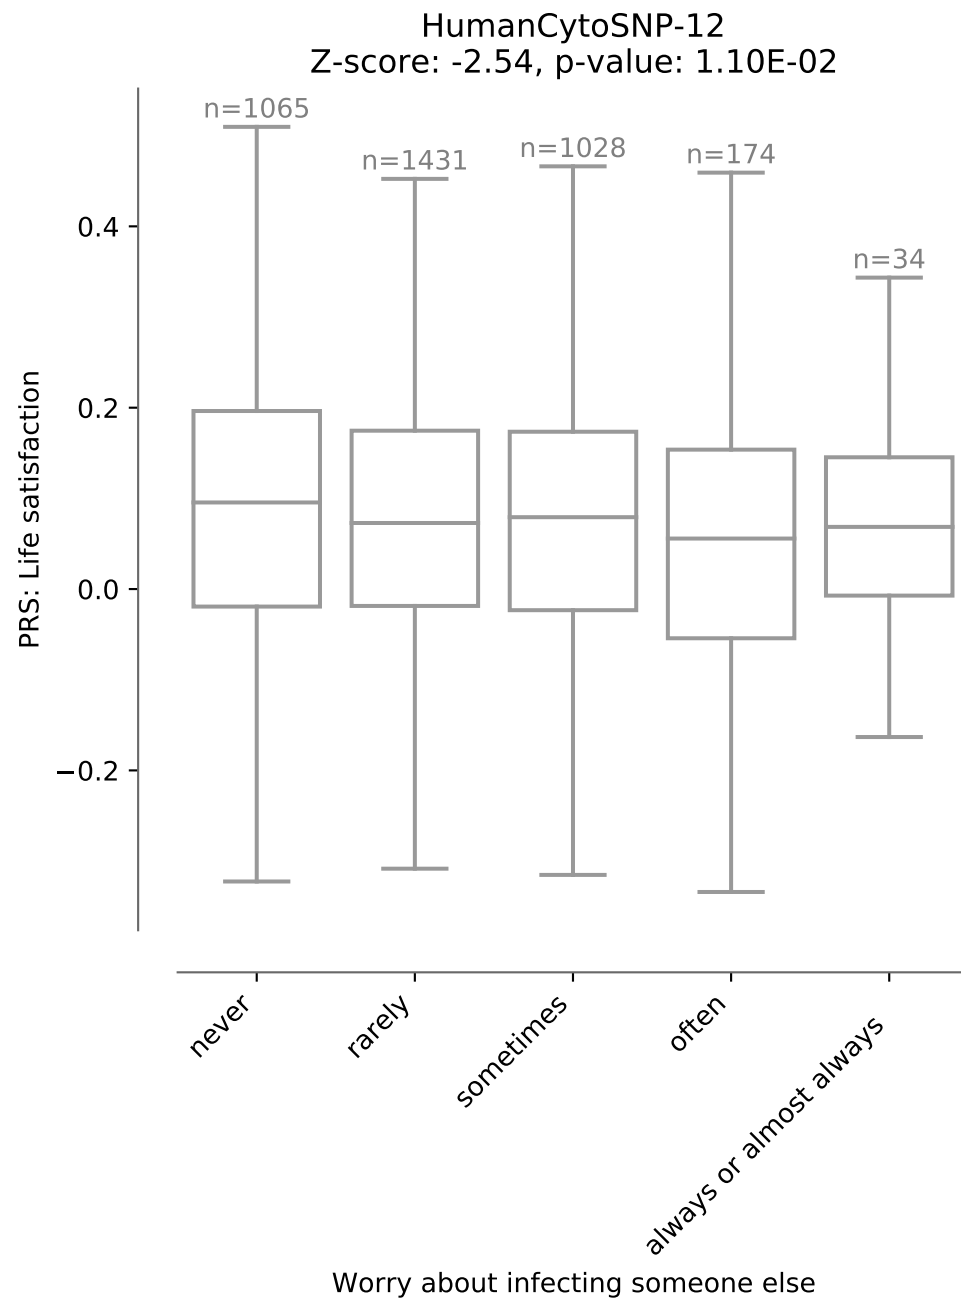

Worry about infecting someone else  
PGS: Neuroticism  
Meta analysis Z-score: 5.47, p-value: 4.51E-08

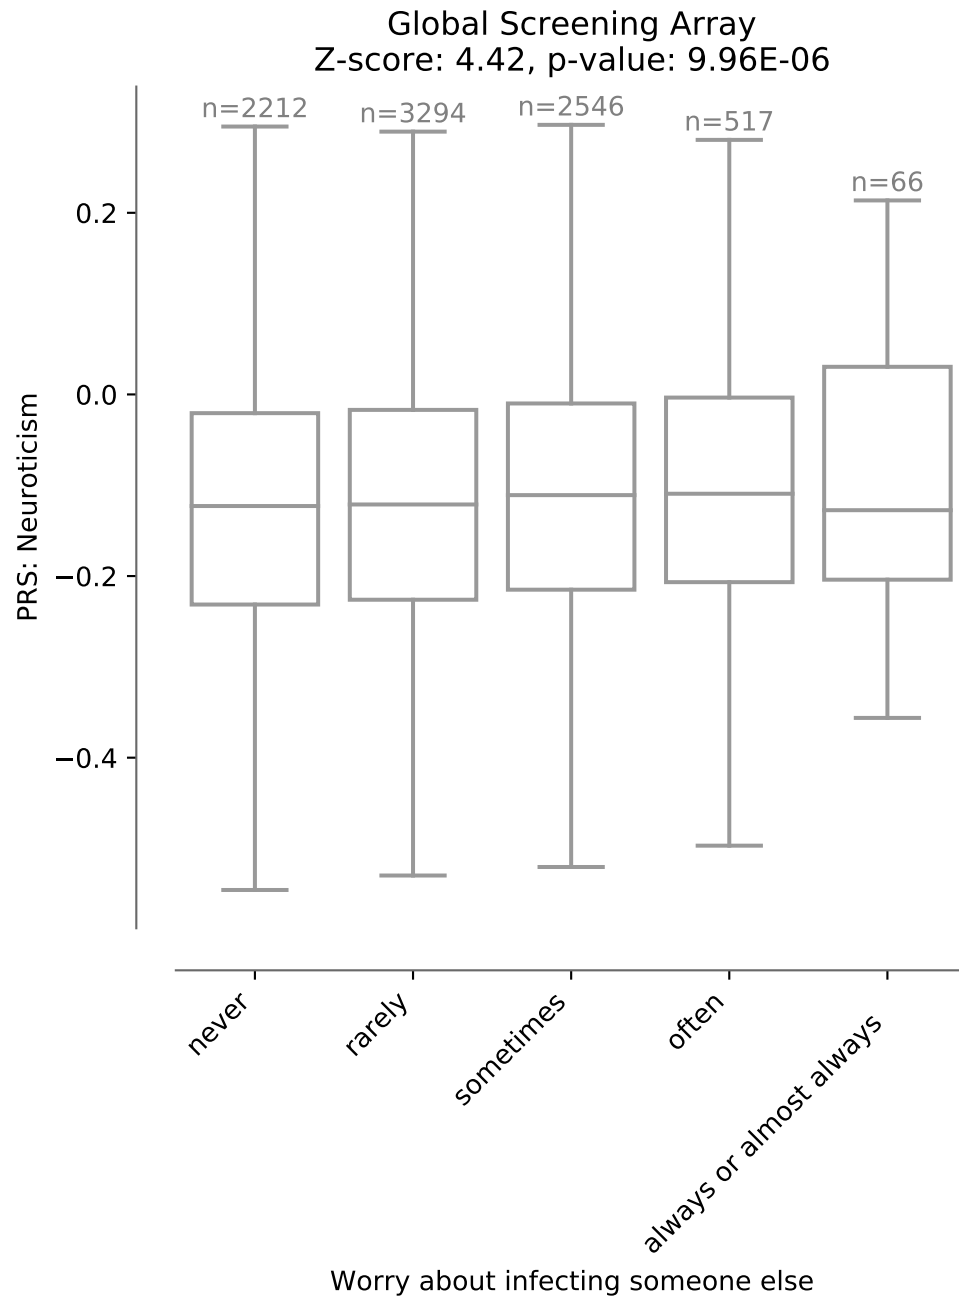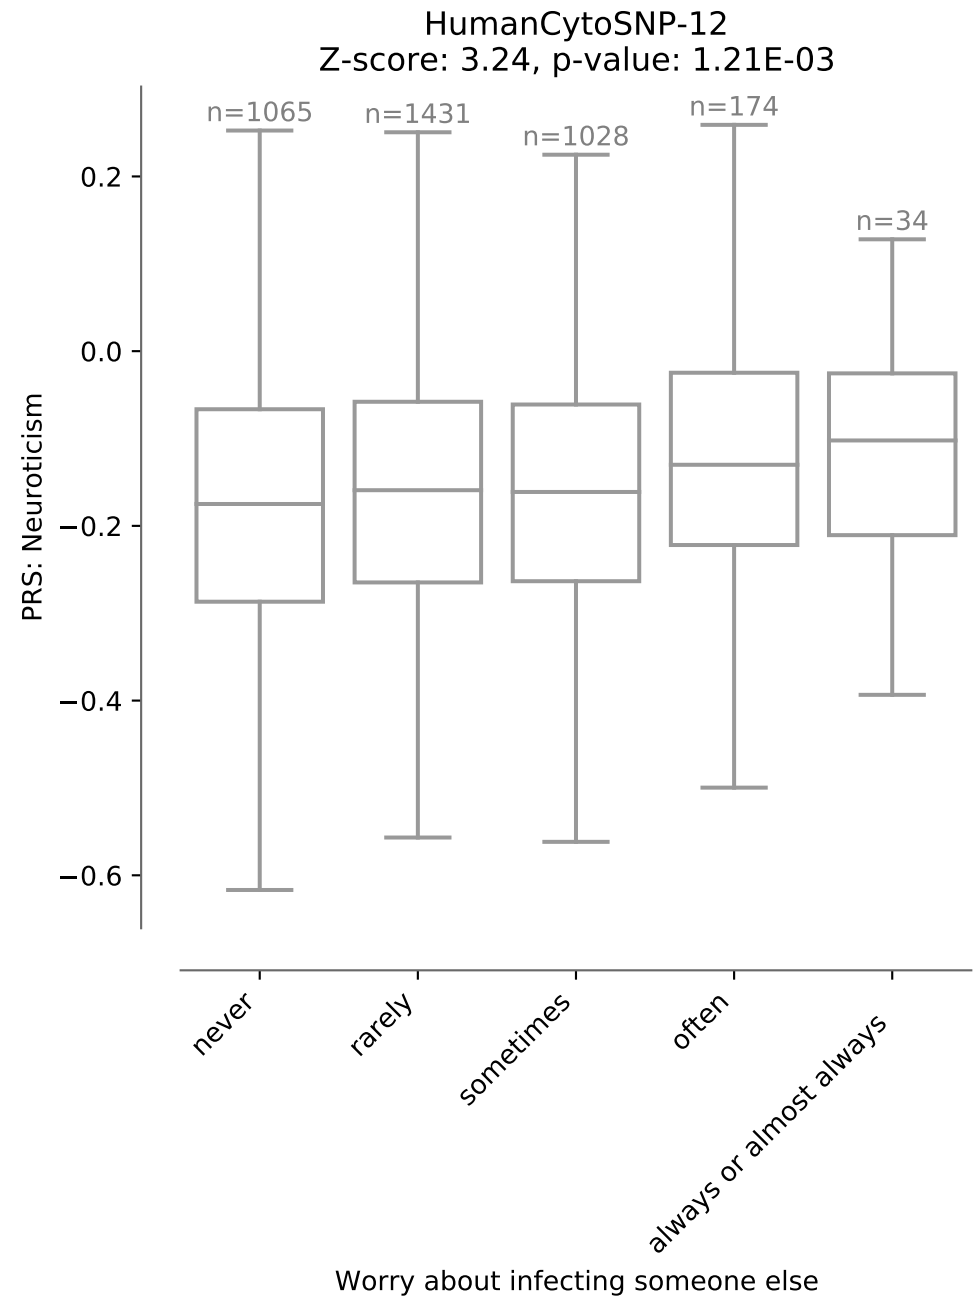

Worry about infecting someone else  
PGS: Worry/vulnerability  
Meta analysis Z-score: 4.72, p-value: 2.41E-06

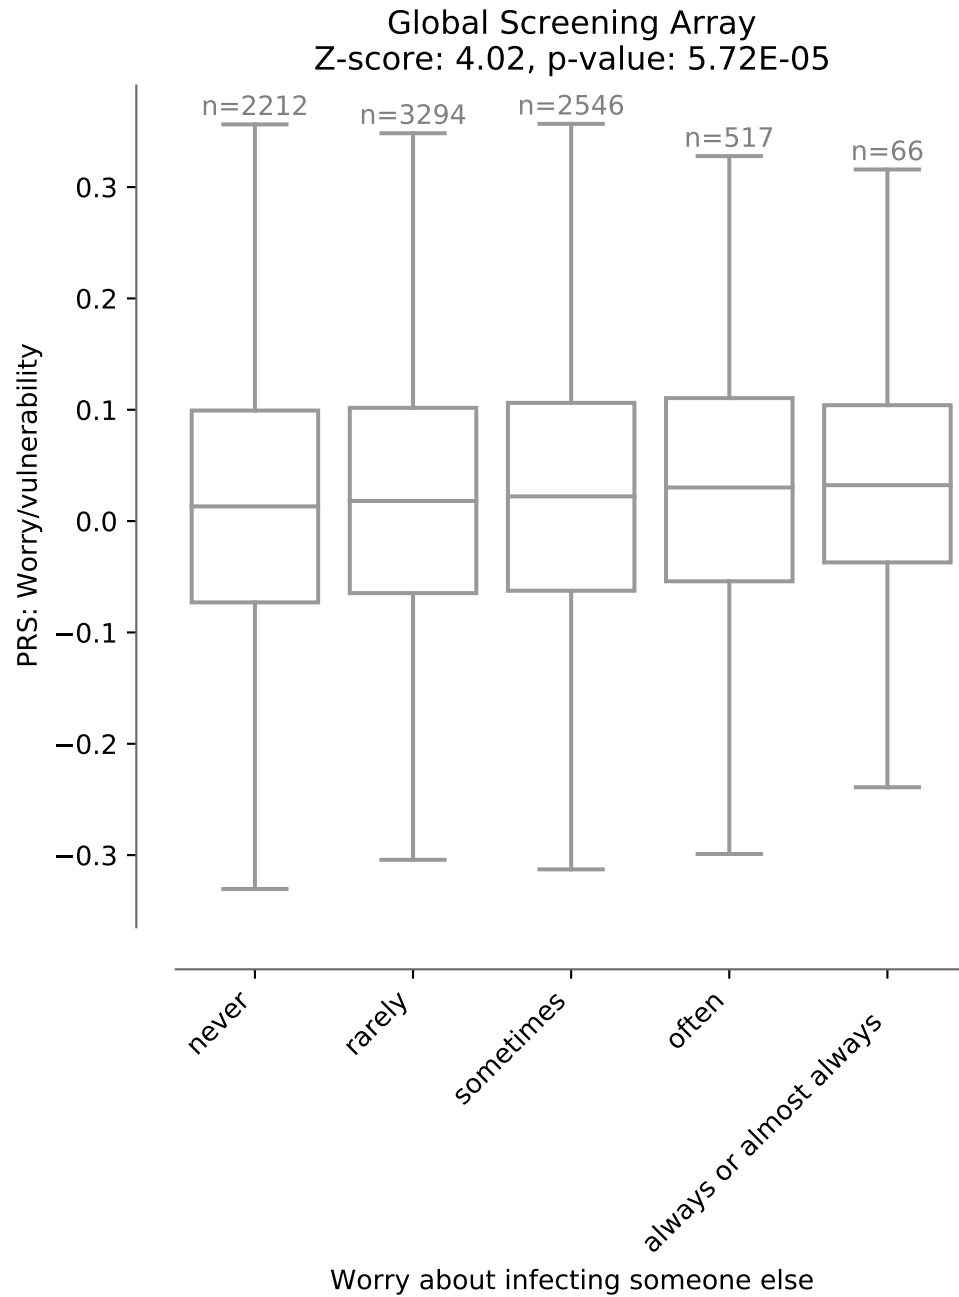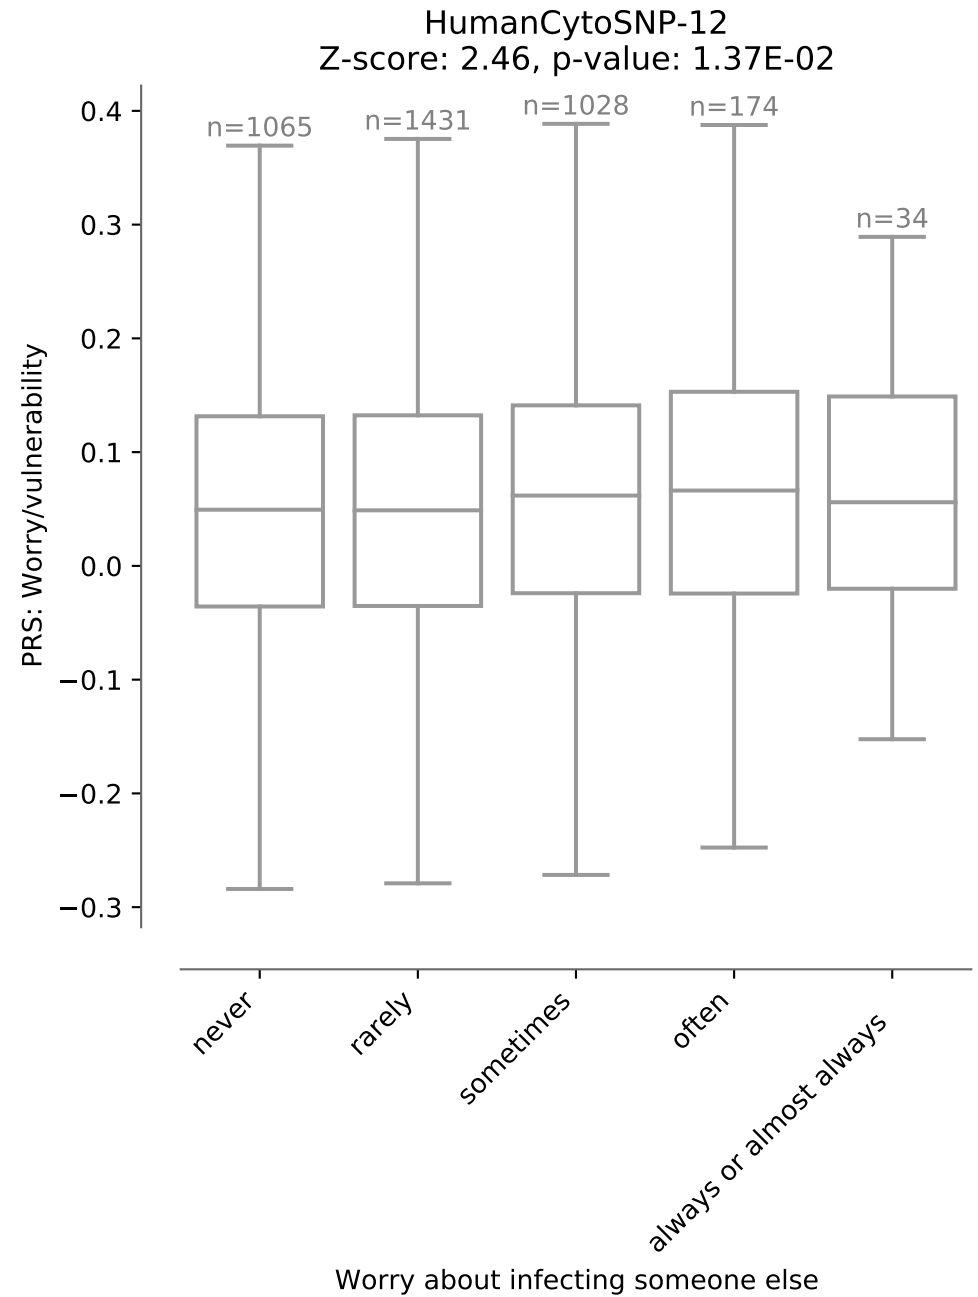



Worried about getting sick  
PGS: Educational attainment  
Meta analysis Z-score: -5.97, p-value: 2.38E-09

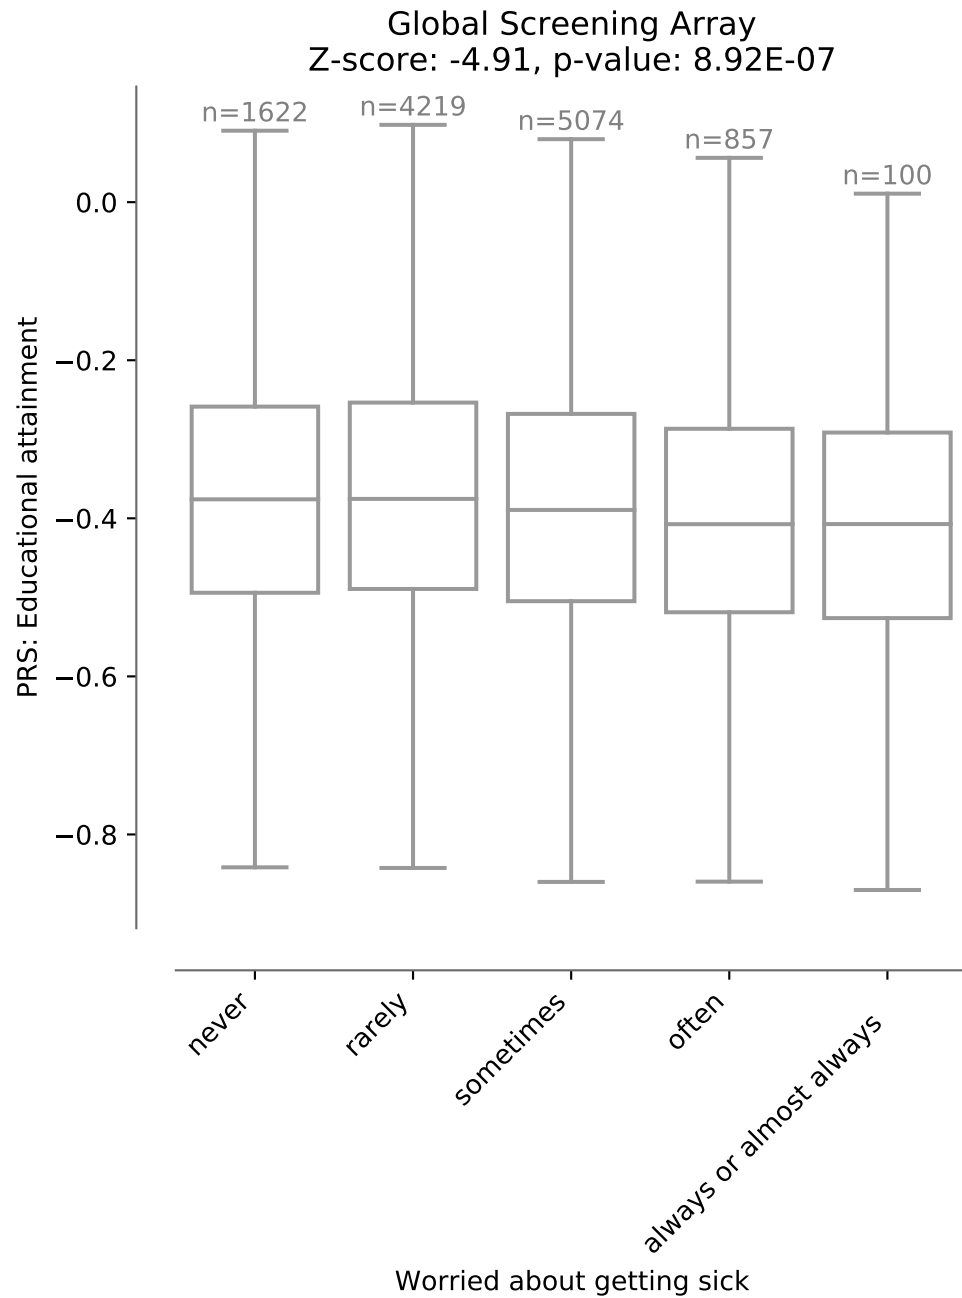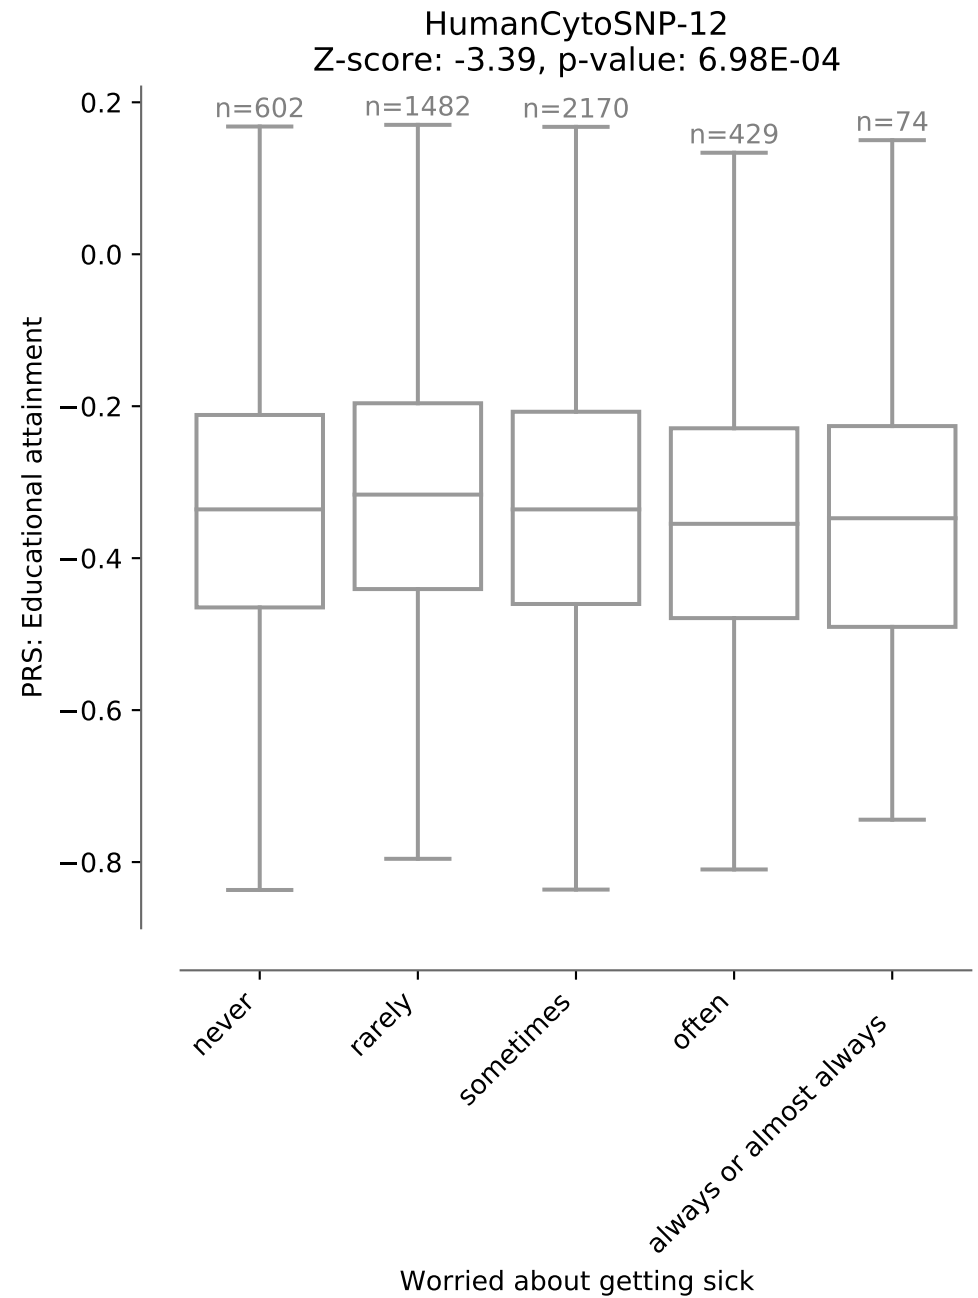

Worried about getting sick  
PGS: Life satisfaction  
Meta analysis Z-score: -4.87, p-value: 1.11E-06

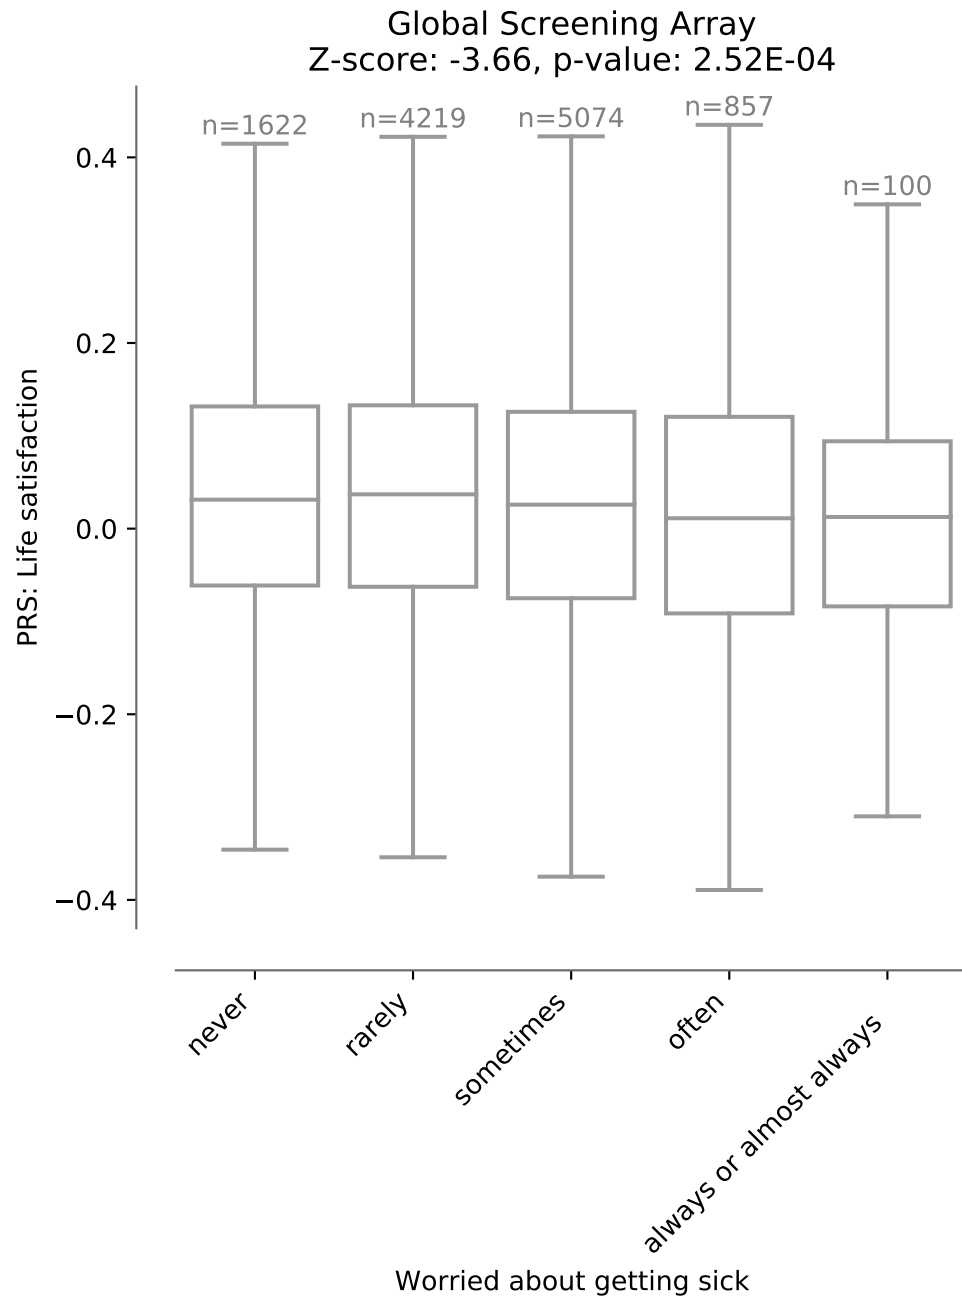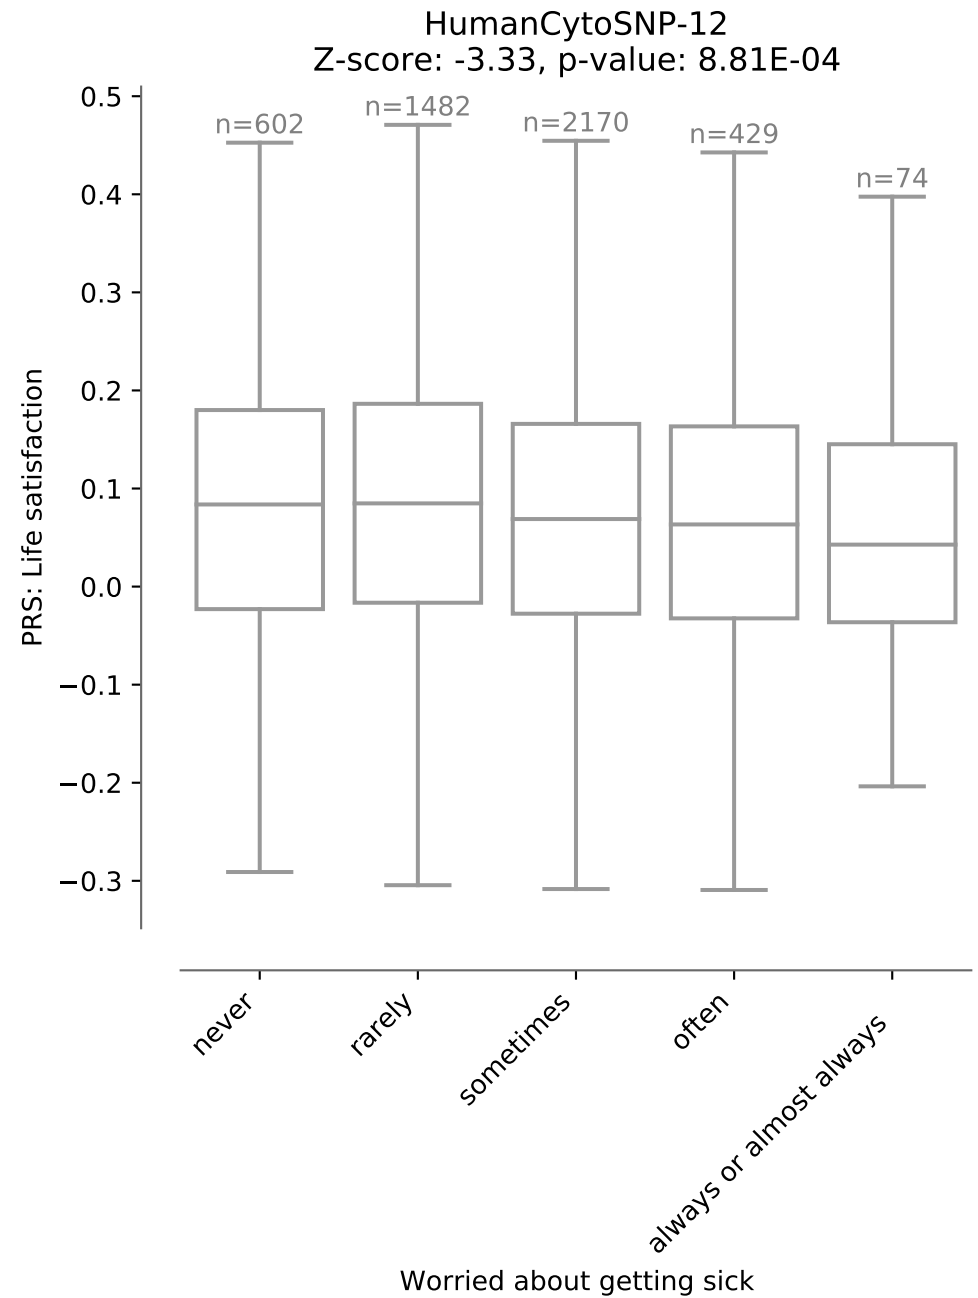

Worried about getting sick  
PGS: Neuroticism  
Meta analysis Z-score: 7.50, p-value: 6.23E-14

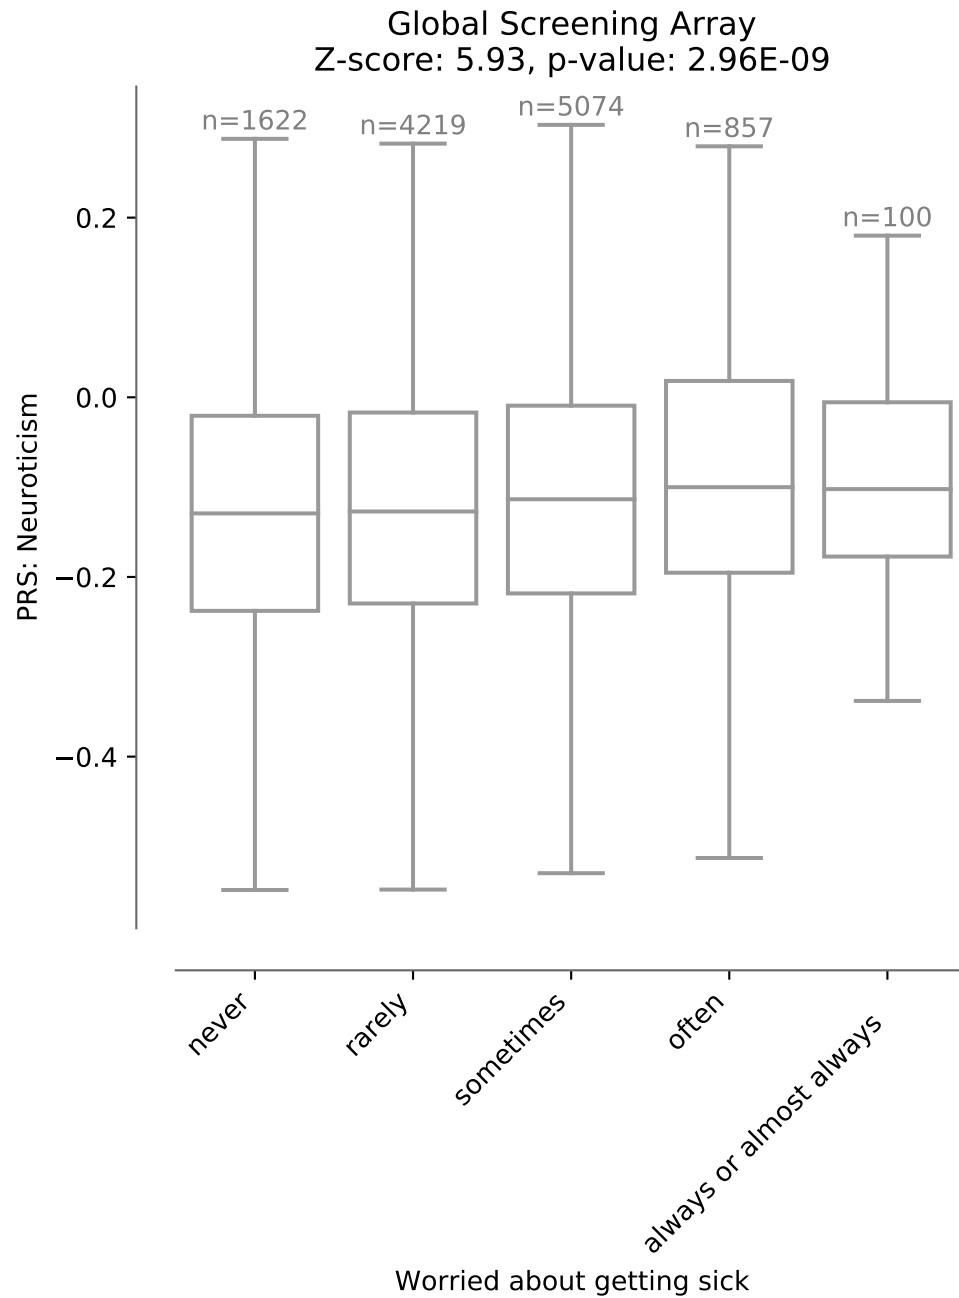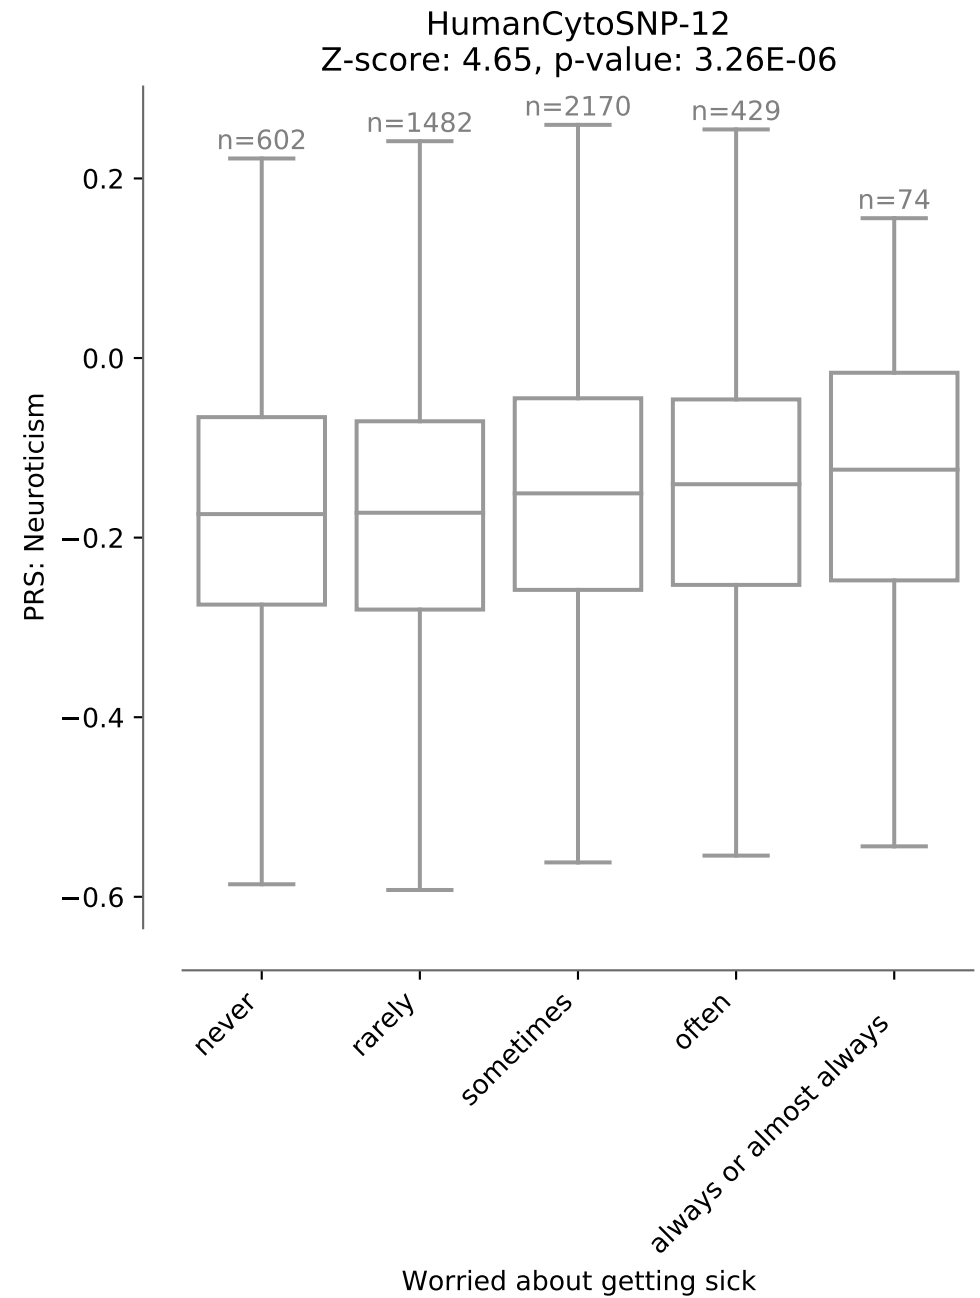

Being bothered by people that do not wear a facemask  
PGS: Neuroticism  
Meta analysis Z-score: 4.65, p-value: 3.32E-06

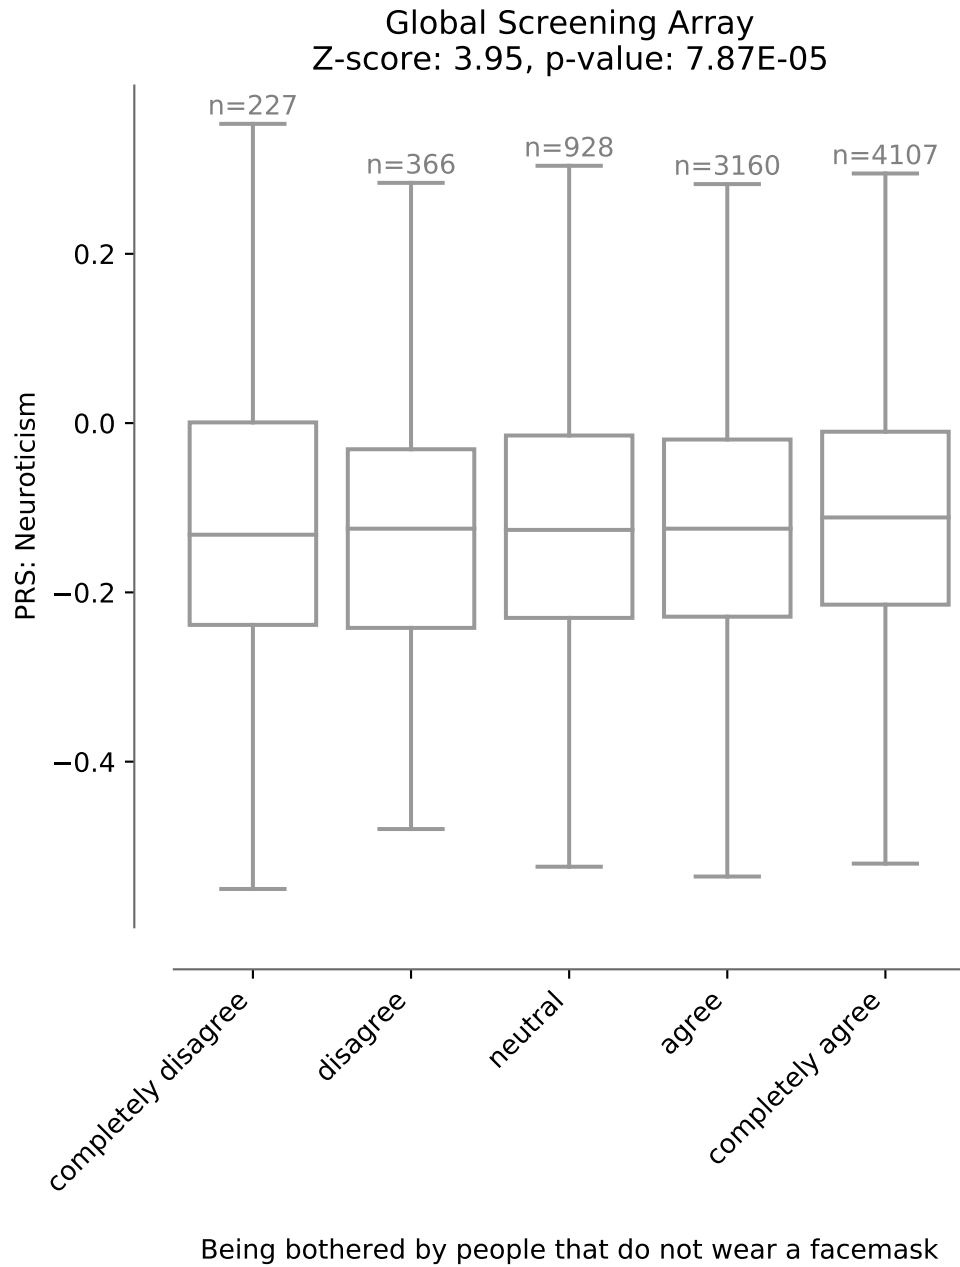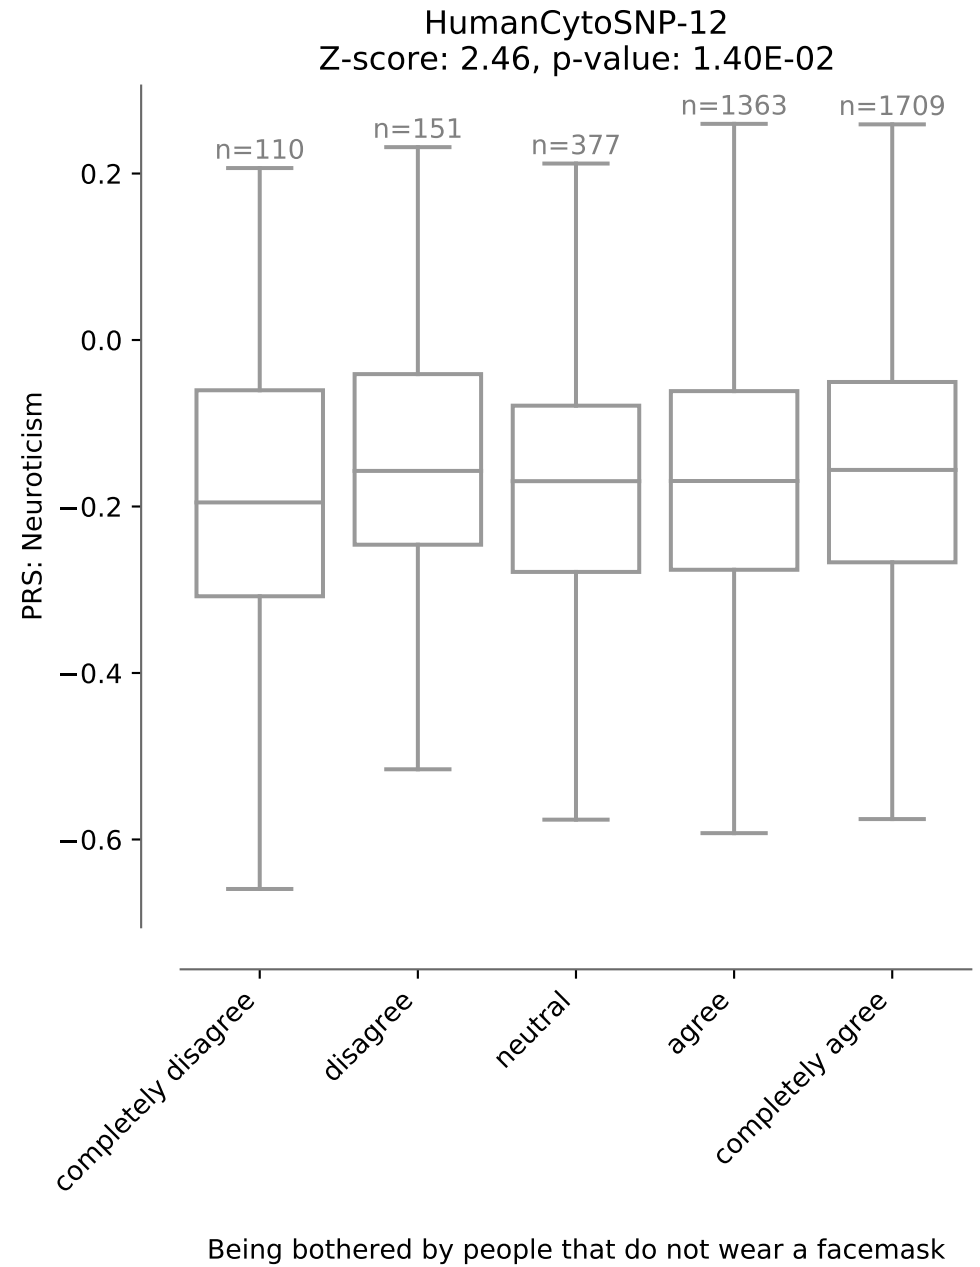

Avoiding bars and restaurants  
PGS: Alcohol use  
Meta analysis Z-score: -5.33, p-value: 9.65E-08

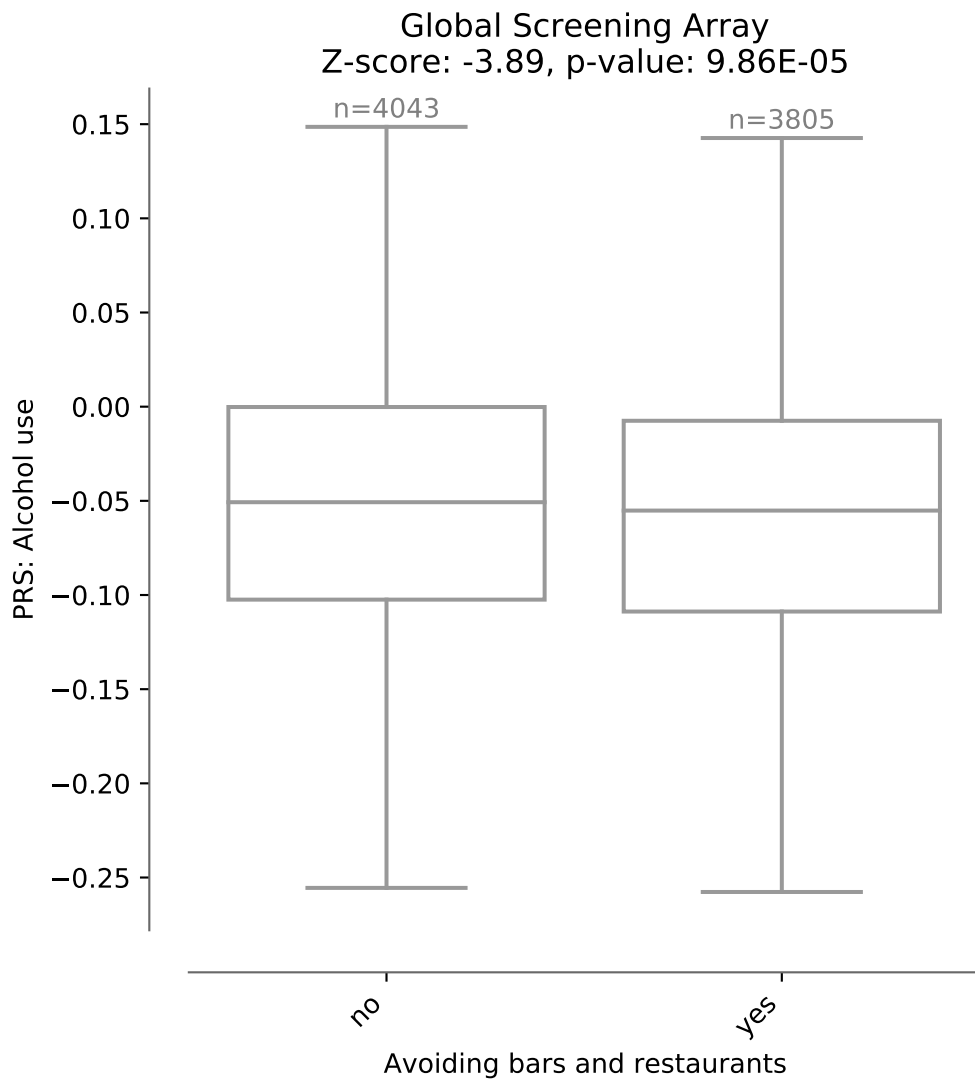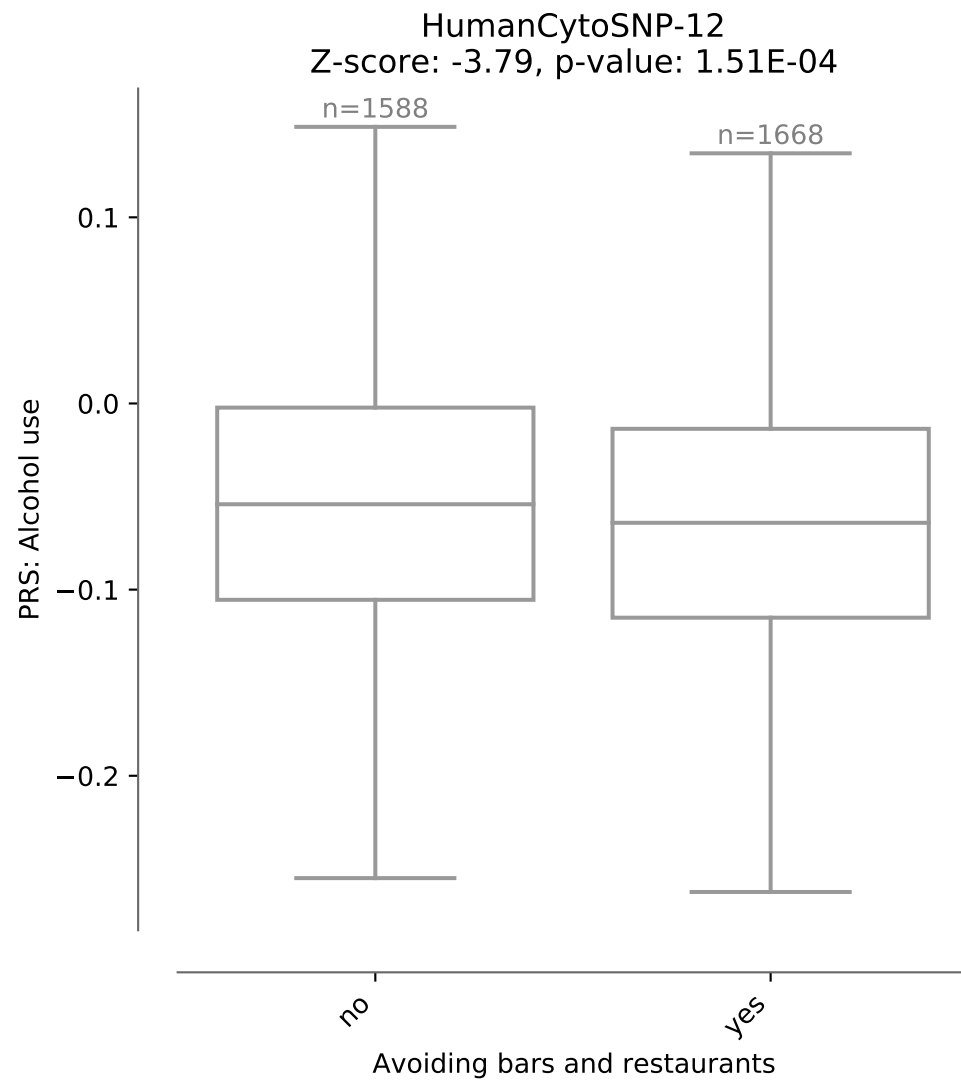

Avoiding parks and beaches  
PGS: Educational attainment  
Meta analysis Z-score: -6.16, p-value: 7.46E-10

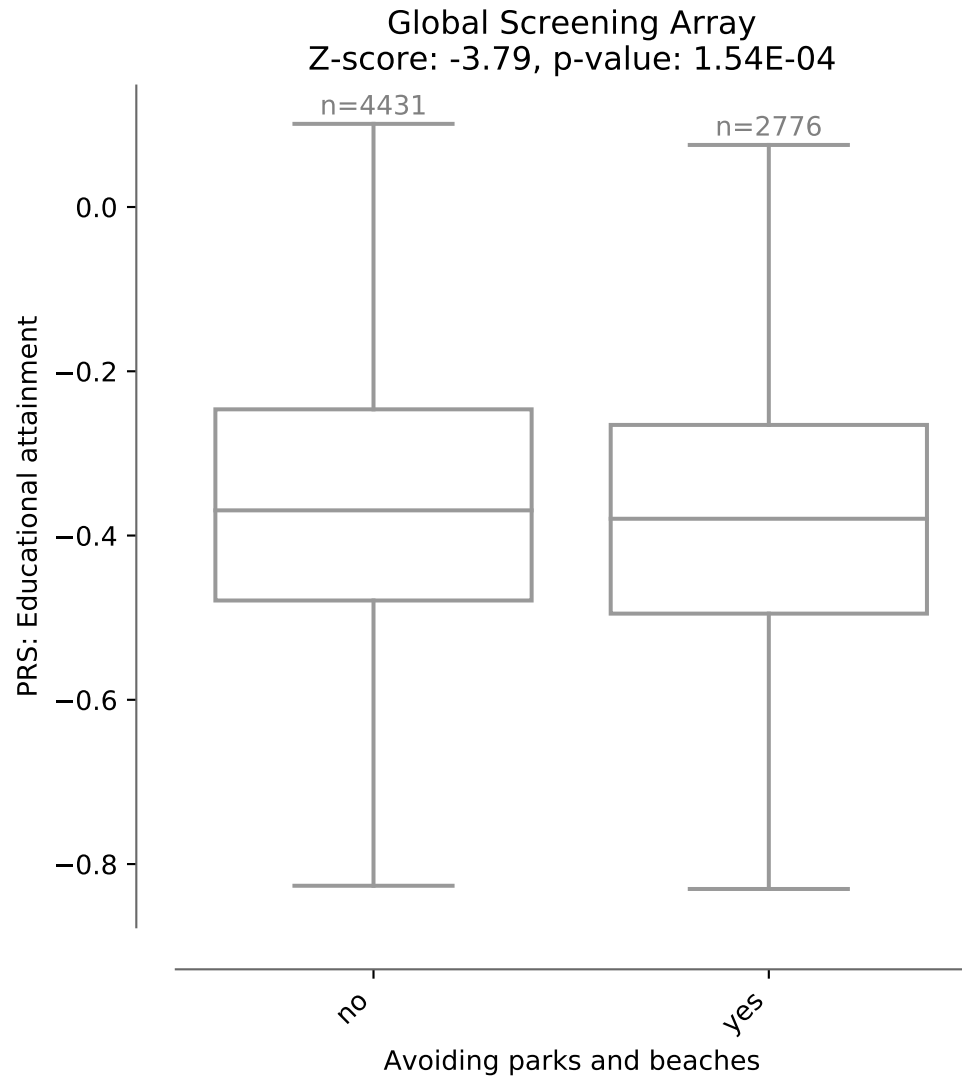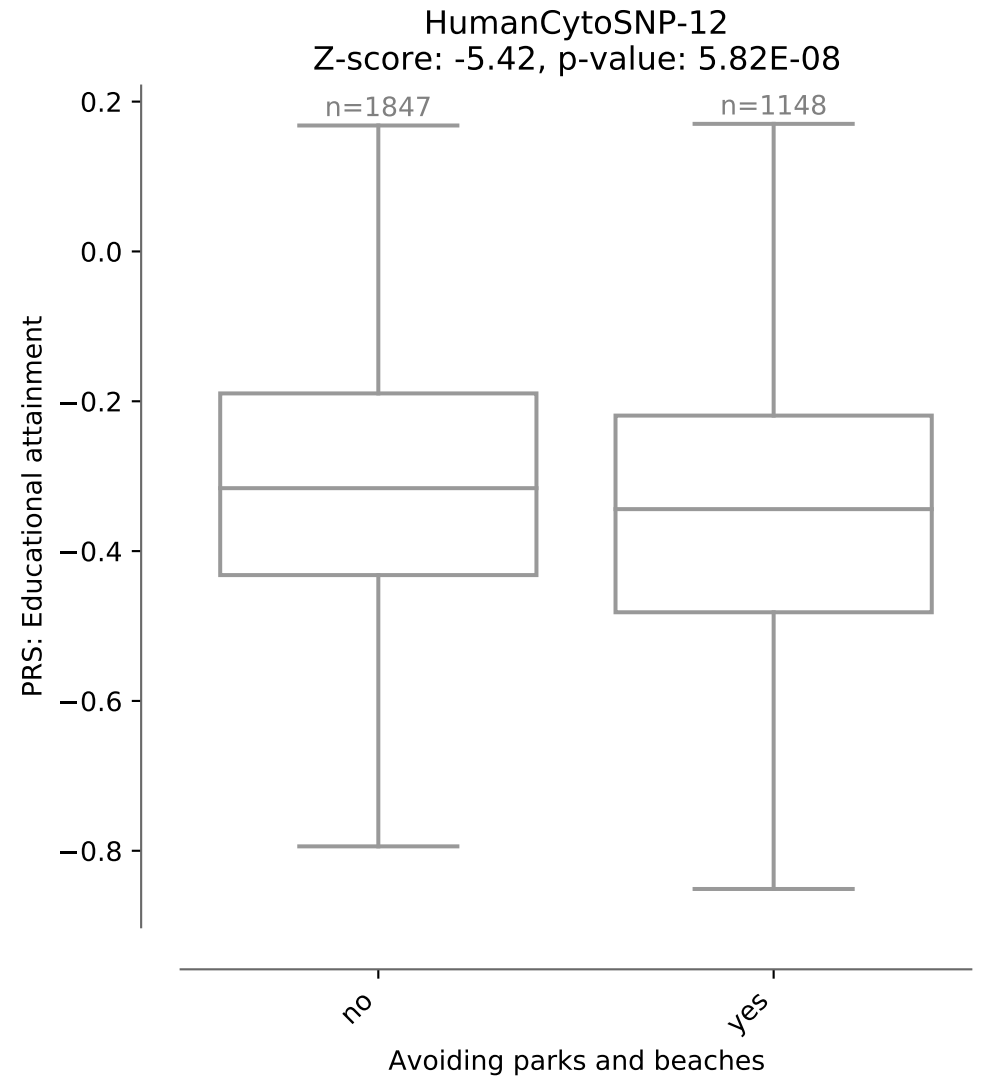

Expecting others to help me after infection  
PGS: Autism spectrum disorder (ASD)  
Meta analysis Z-score: -5.69, p-value: 1.29E-08

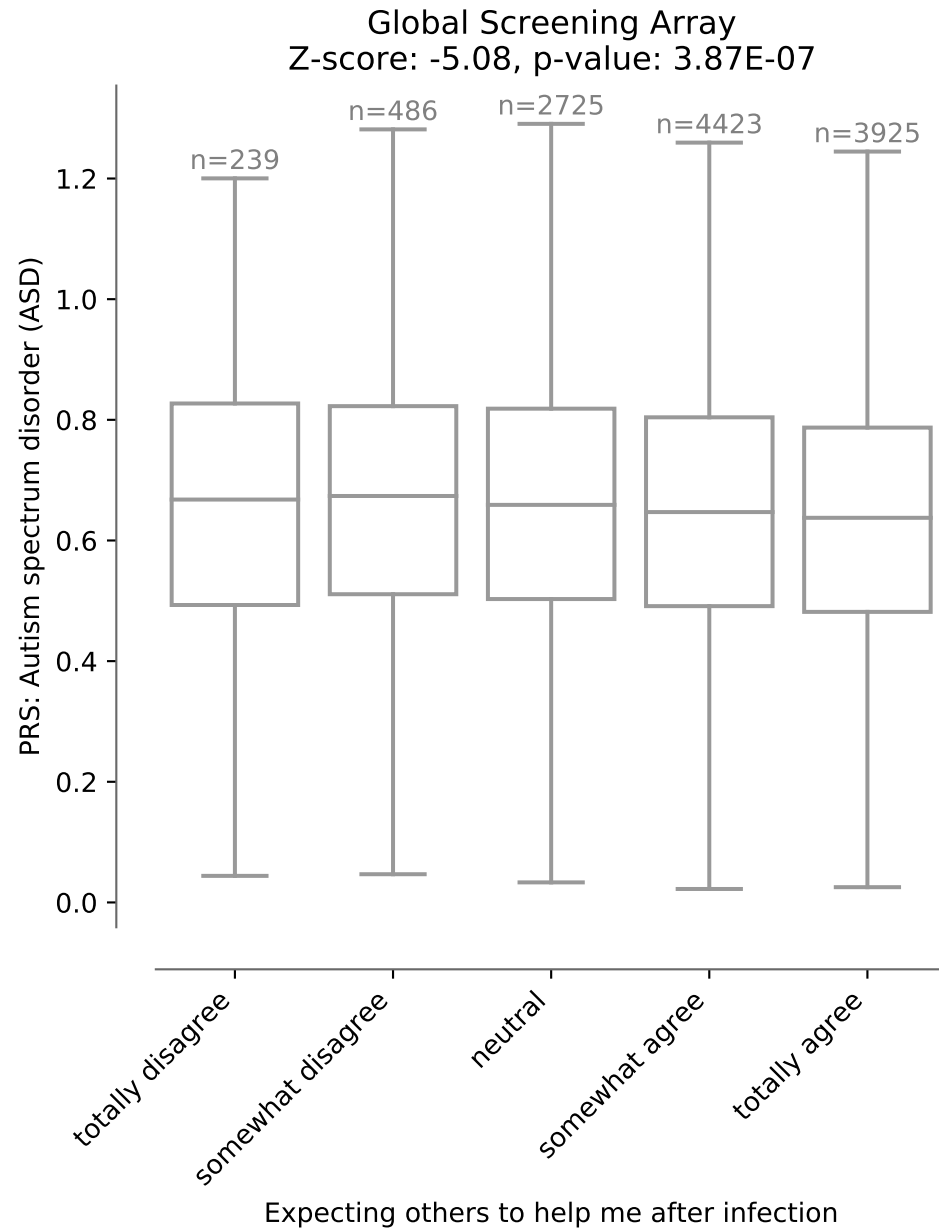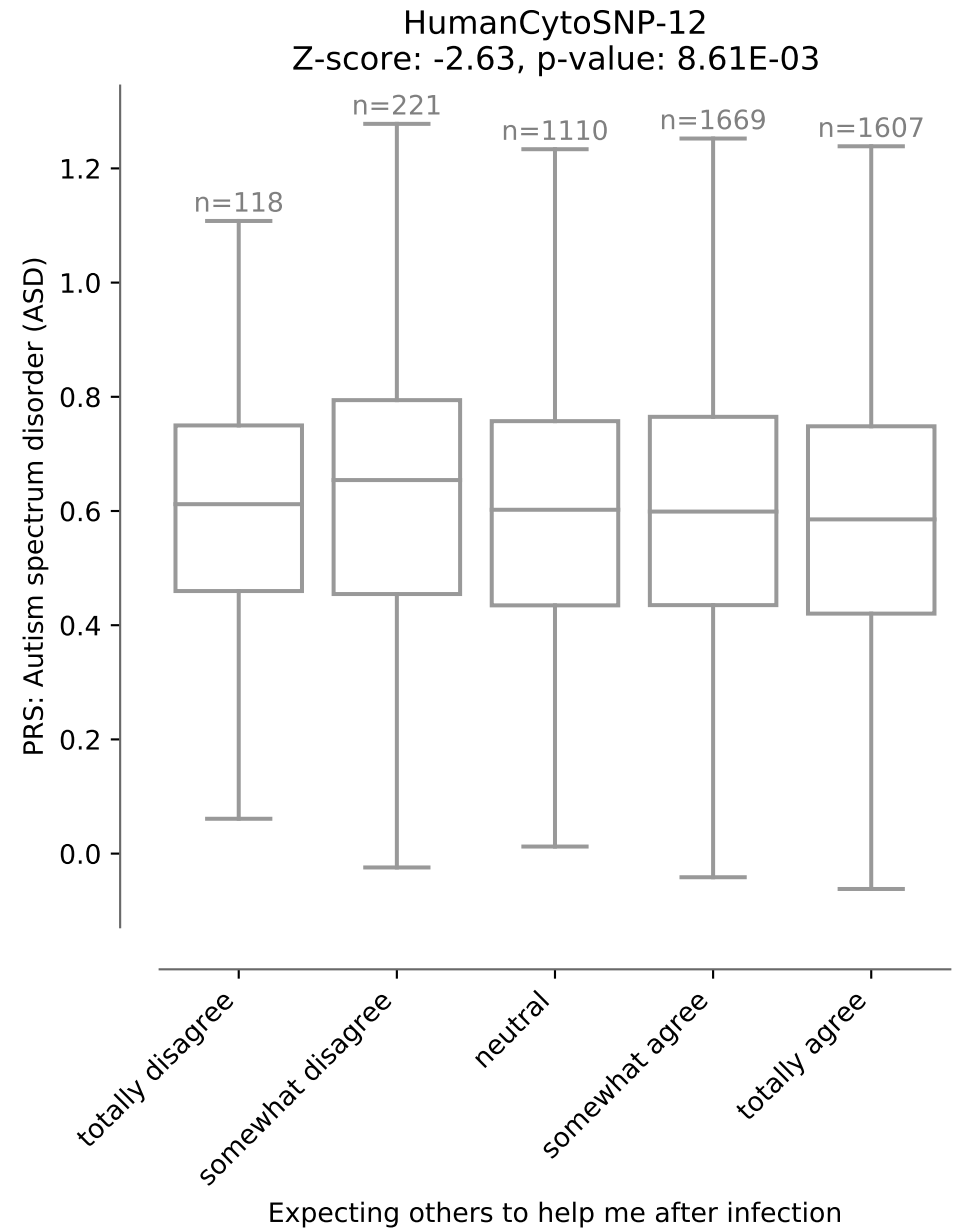

Finding that the money for financial support should be spend to improve healthcare  
PGS: Educational attainment  
Meta analysis Z-score: -9.39, p-value: 6.28E-21

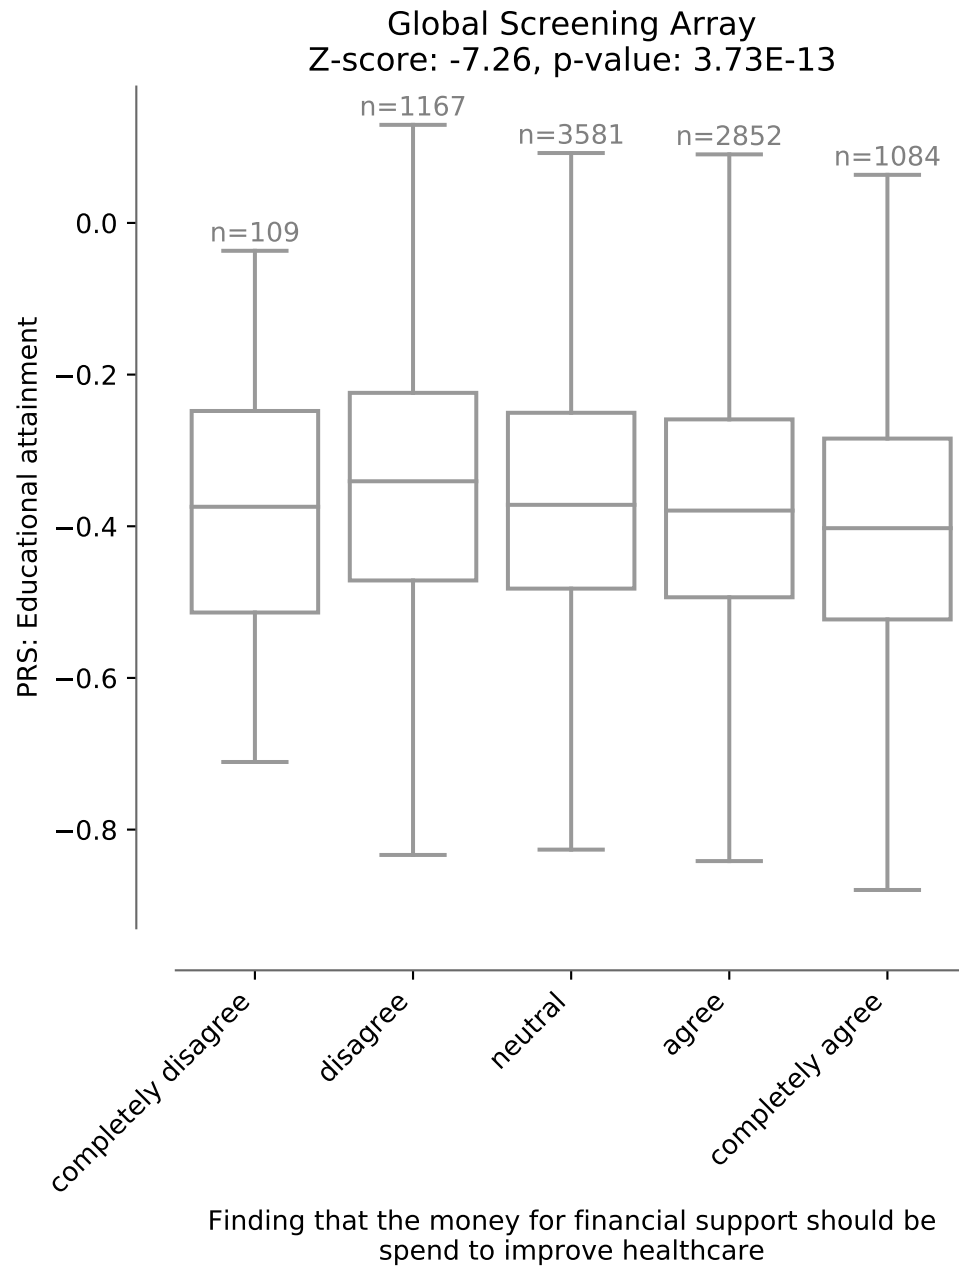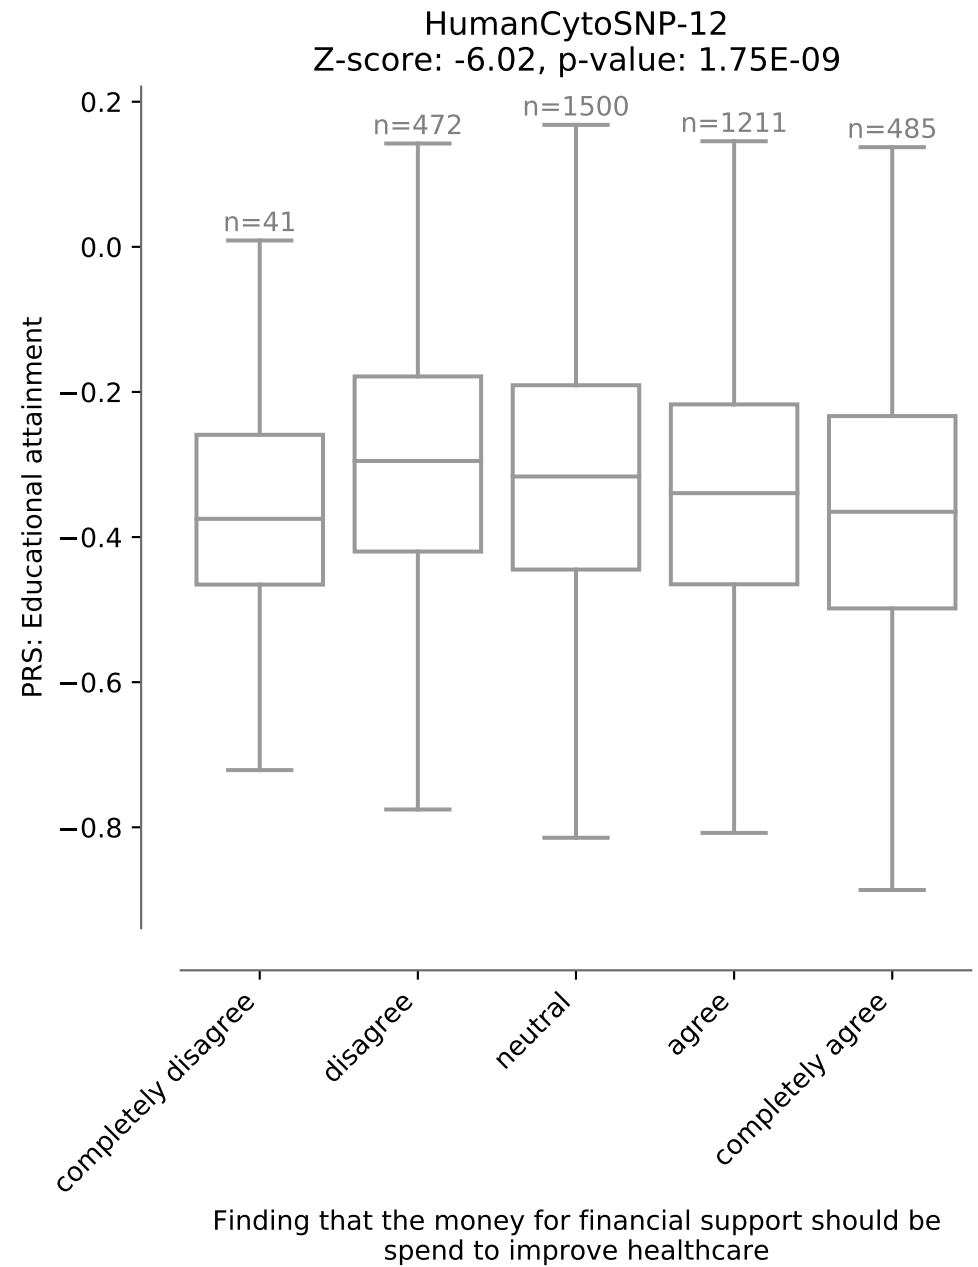



Finding that it is important to watch COVID-19 press-conferences  
PGS: Schizophrenia  
Meta analysis Z-score: 5.18, p-value: 2.19E-07

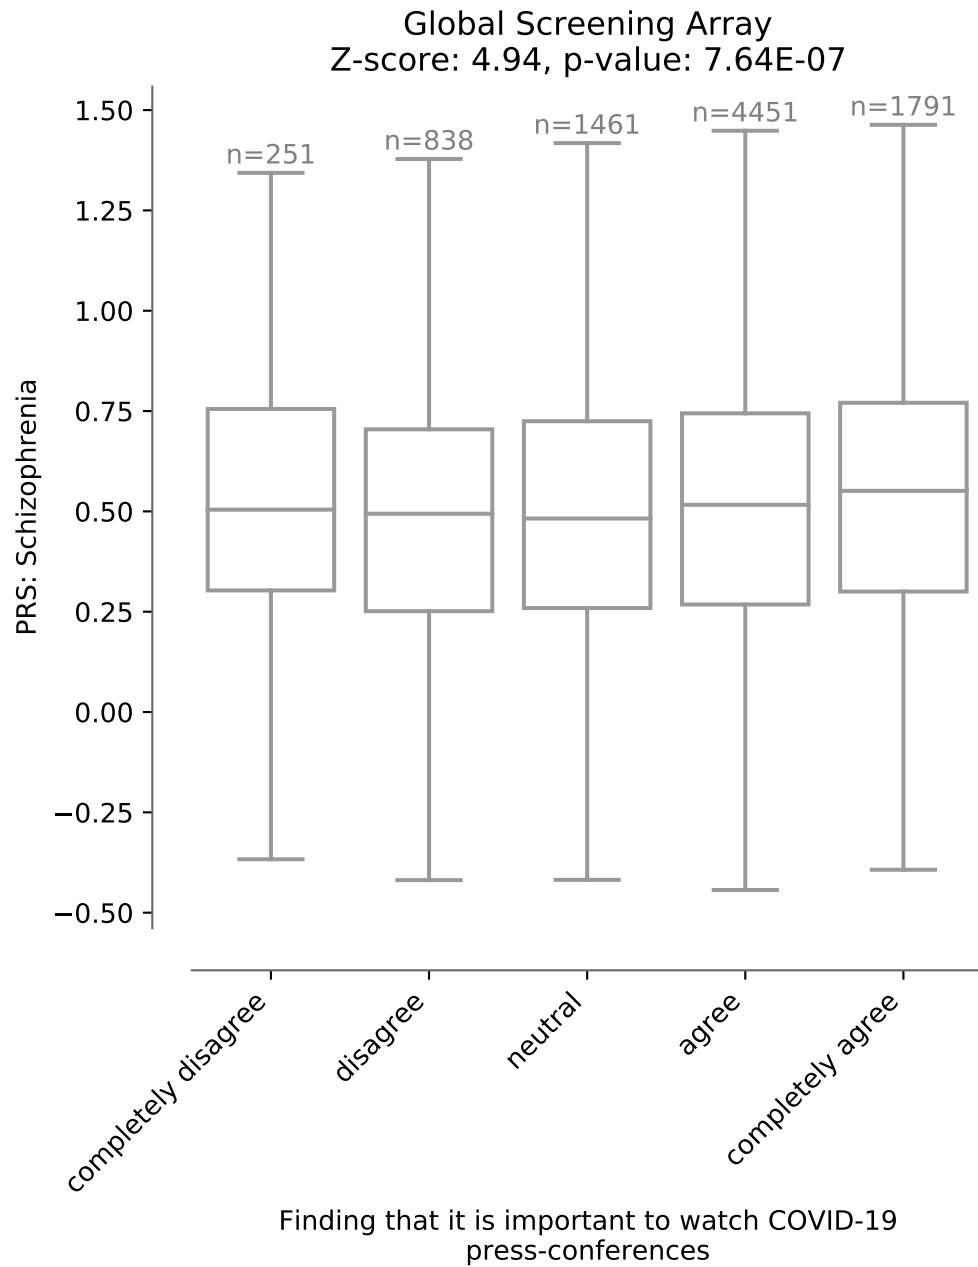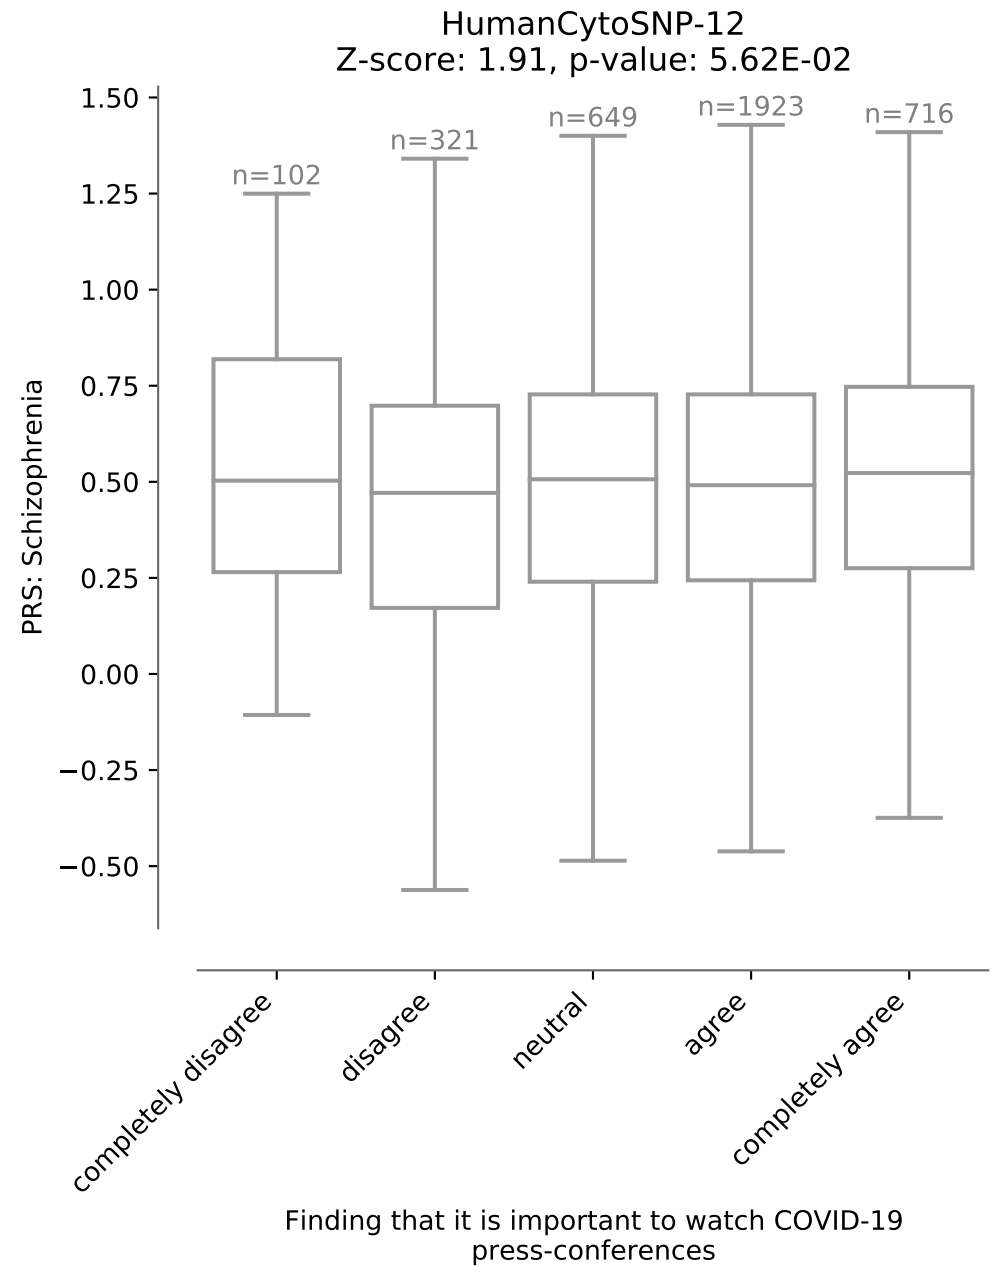

Finding that the government listening to scientists is important for the corona policy  
PGS: Educational attainment  
Meta analysis Z-score: 5.80, p-value: 6.74E-09

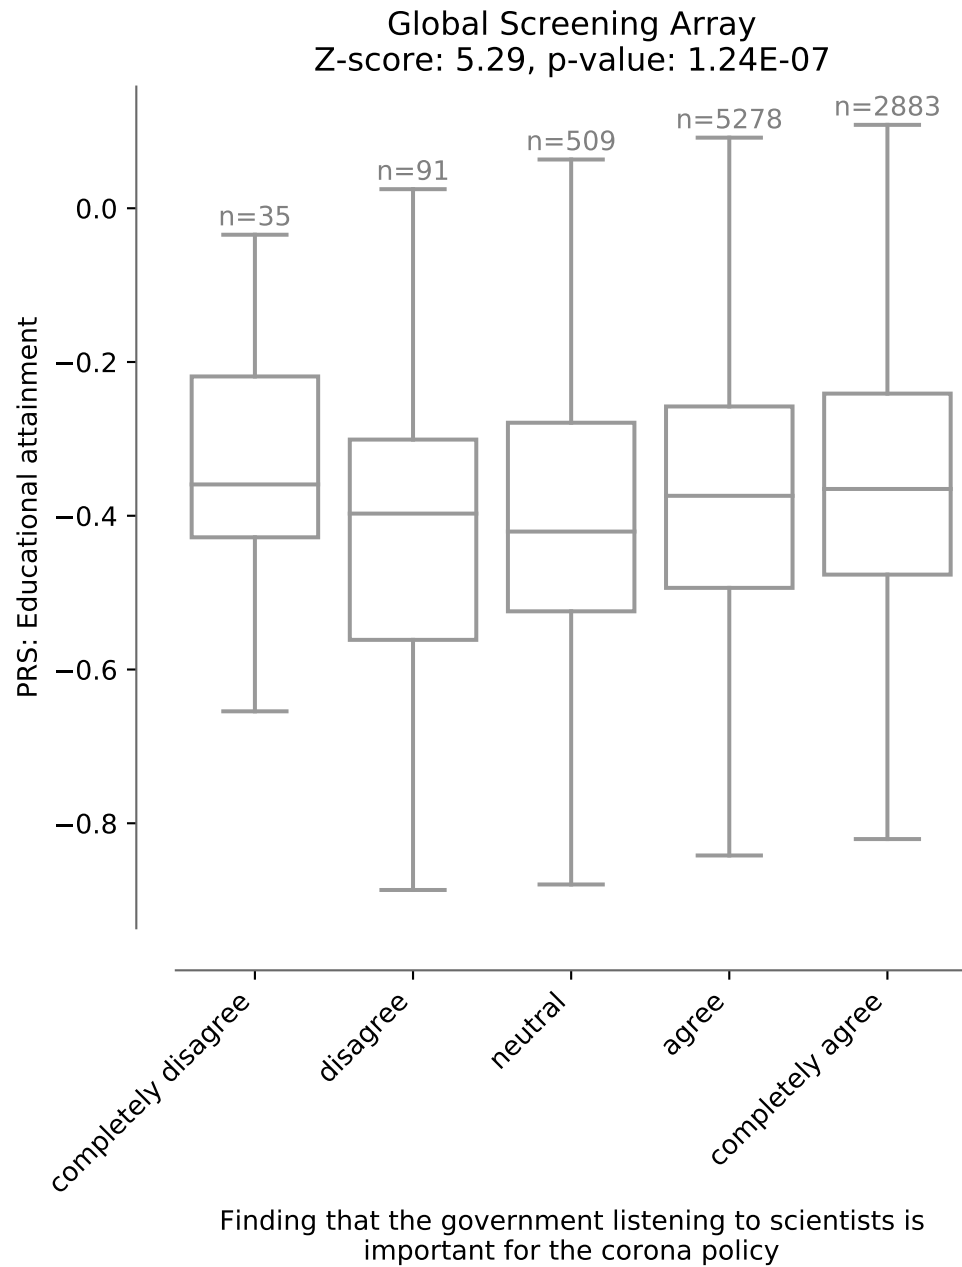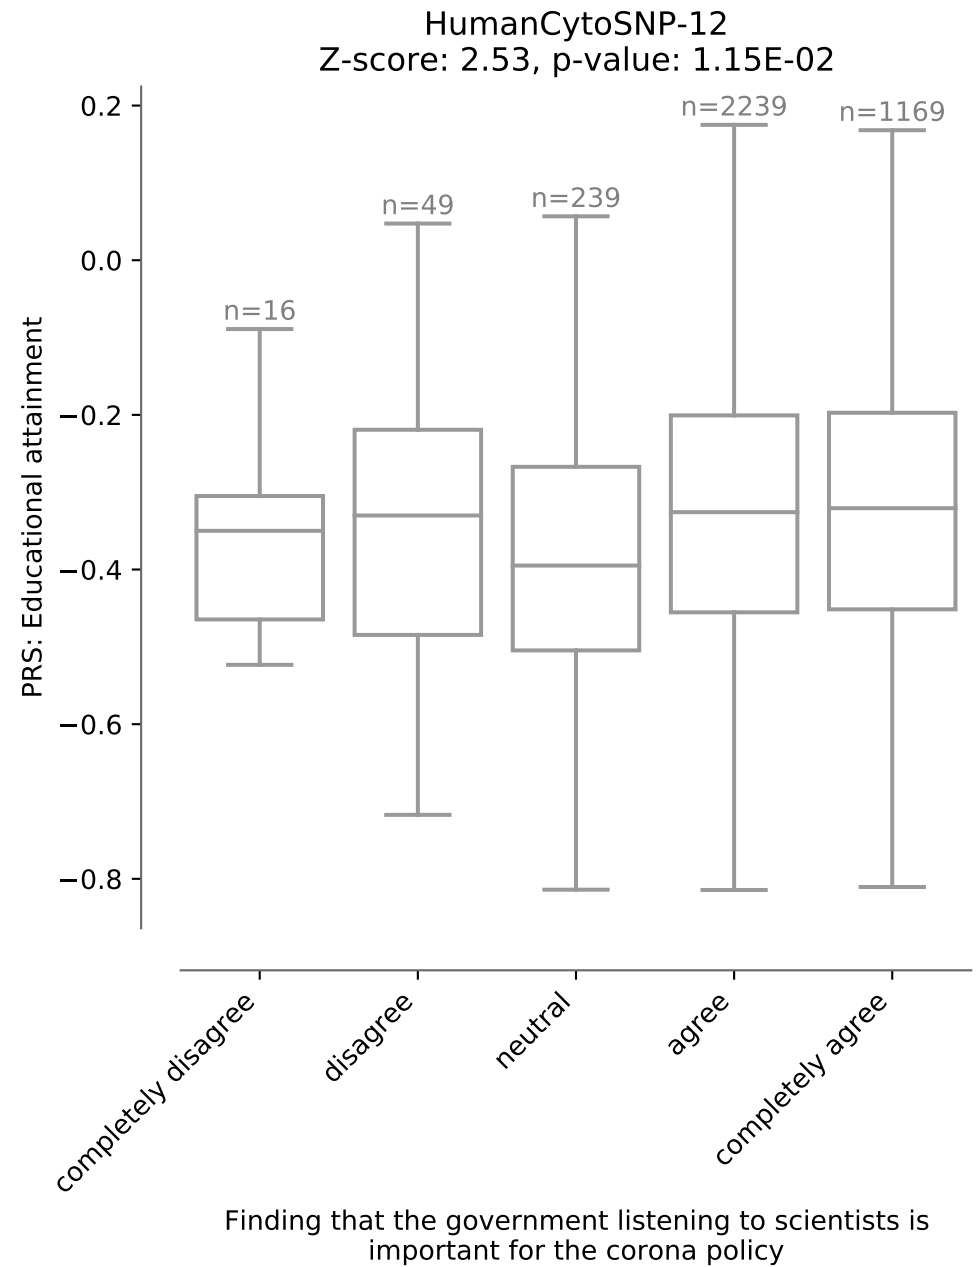

Finding the corona vaccine scary  
PGS: Educational attainment  
Meta analysis Z-score: -8.32, p-value: 8.59E-17

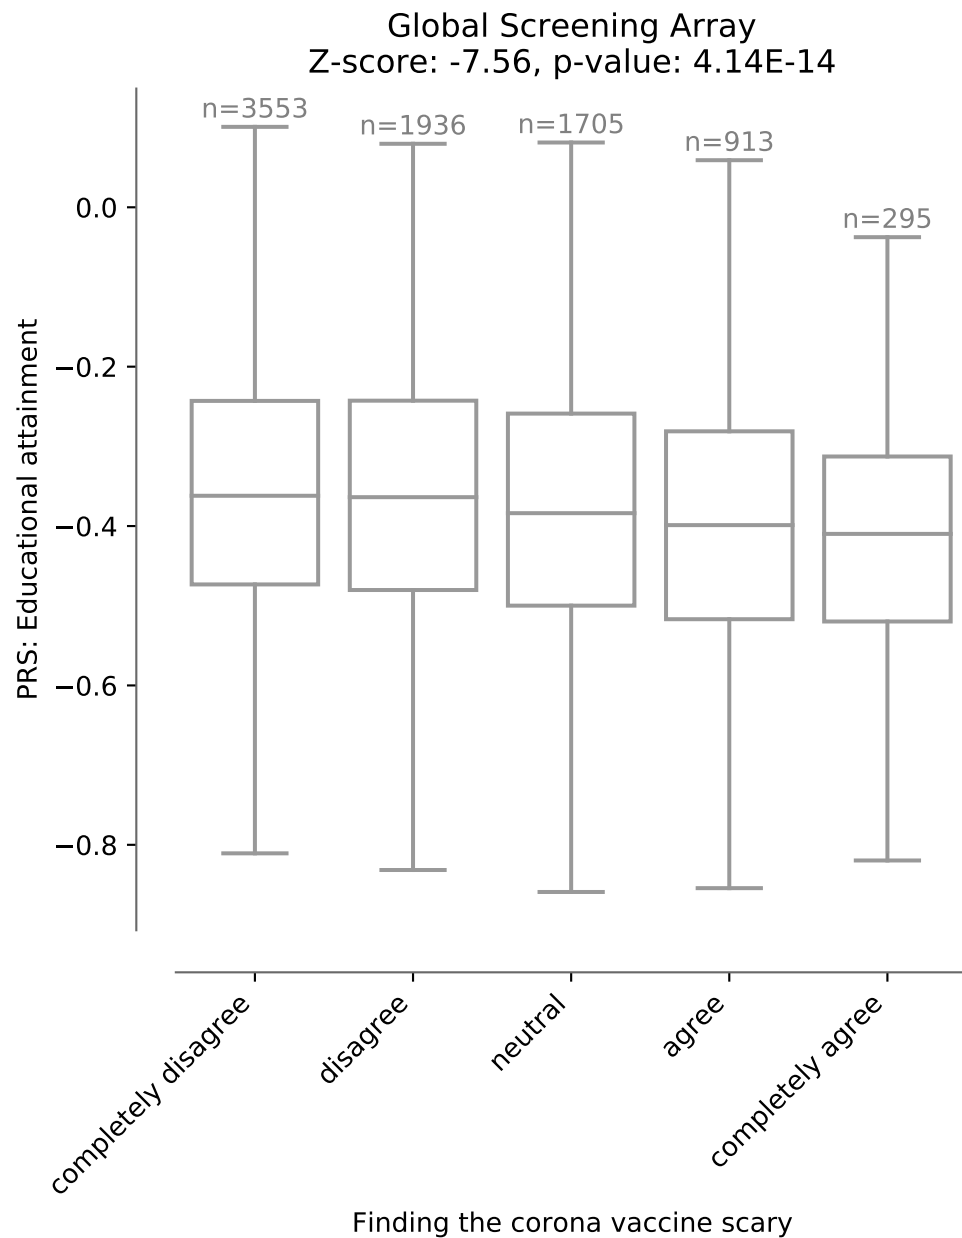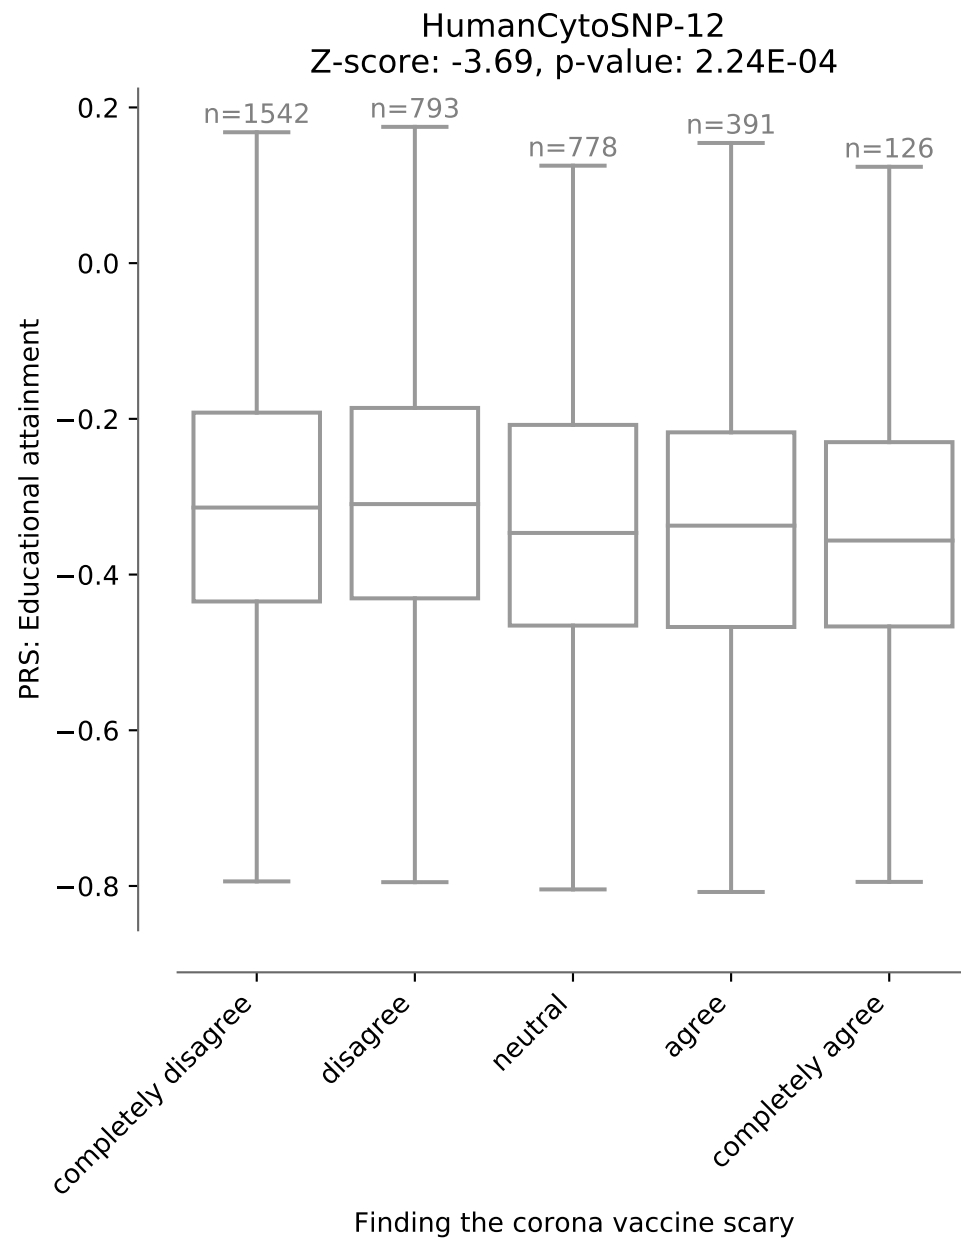

Finding the corona vaccine scary  
PGS: Life satisfaction  
Meta analysis Z-score: -5.53, p-value: 3.16E-08

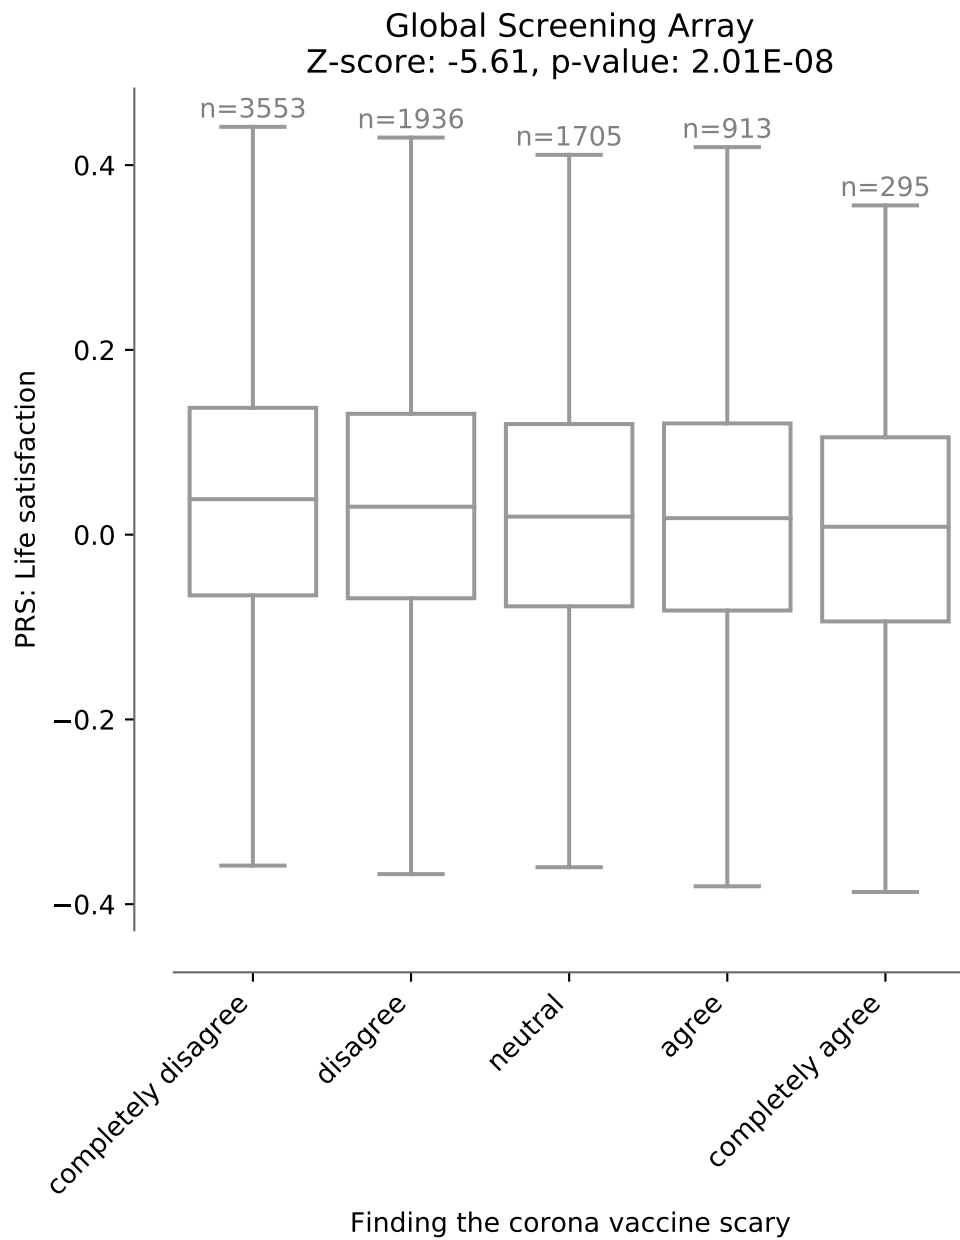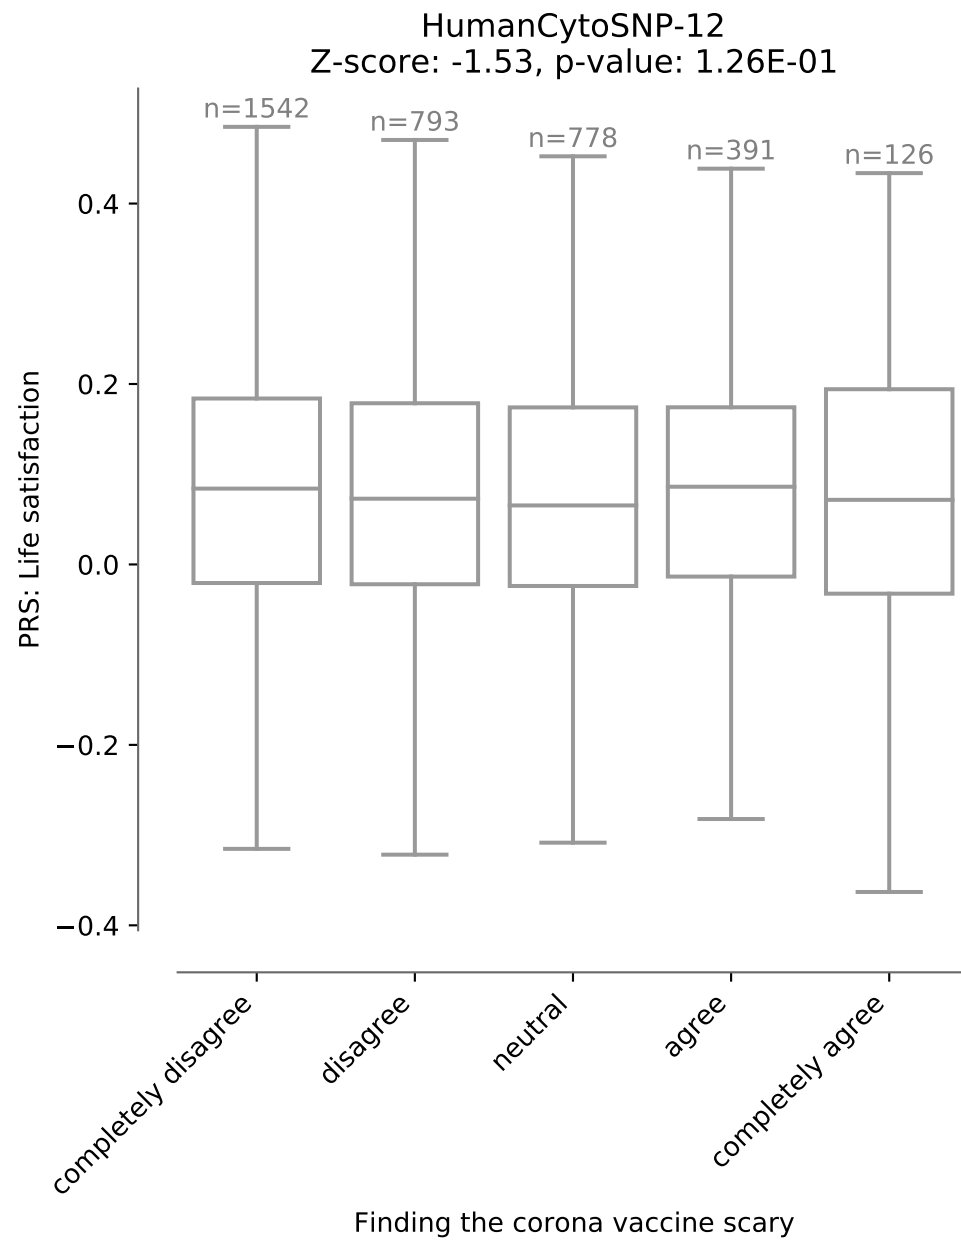

Finding the corona vaccine scary  
PGS: Neuroticism  
Meta analysis Z-score: 6.96, p-value: 3.39E-12

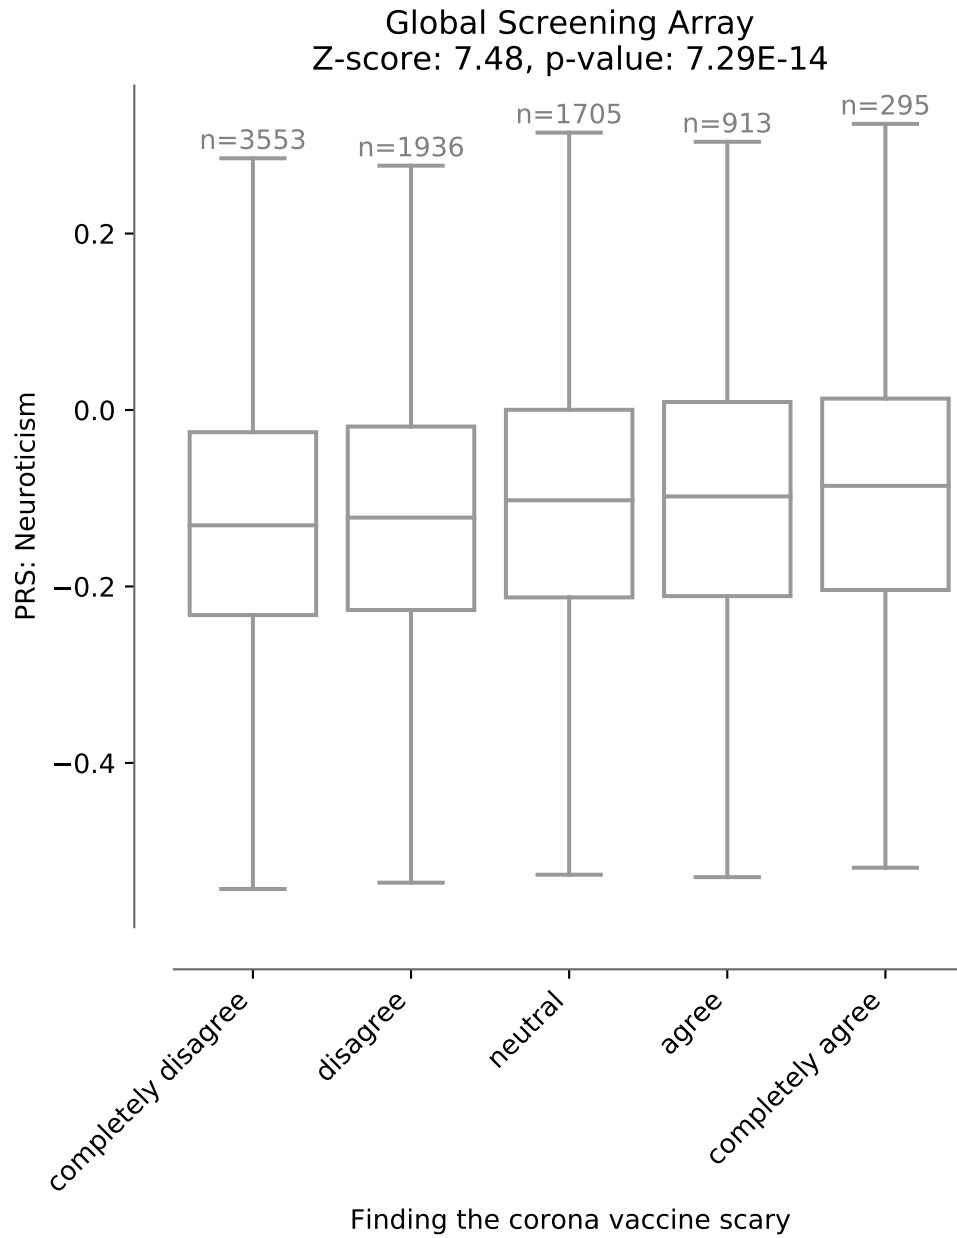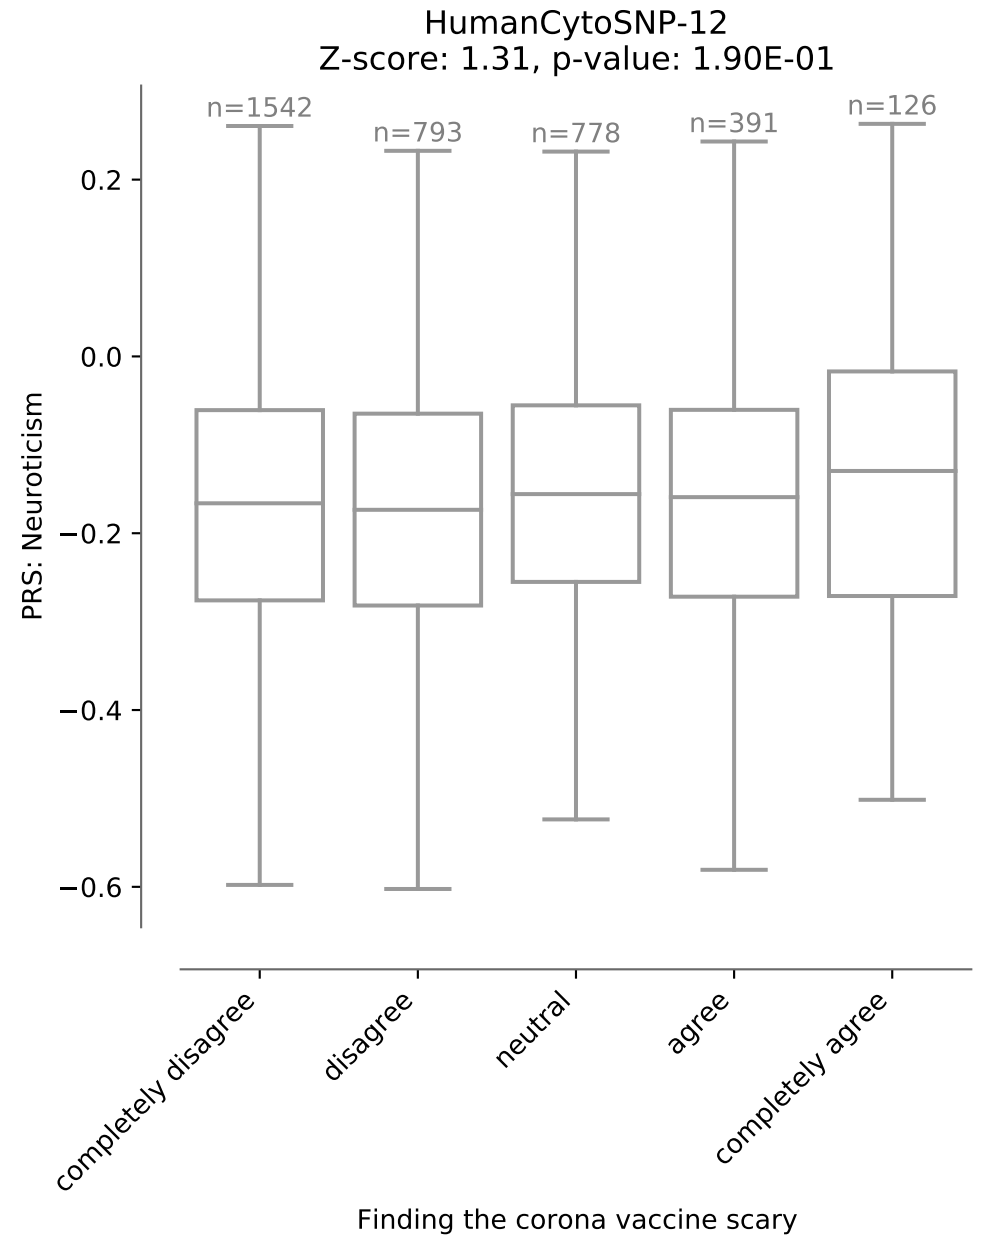

Appreciating social distancing in general  
PGS: Educational attainment  
Meta analysis Z-score: -4.99, p-value: 5.90E-07

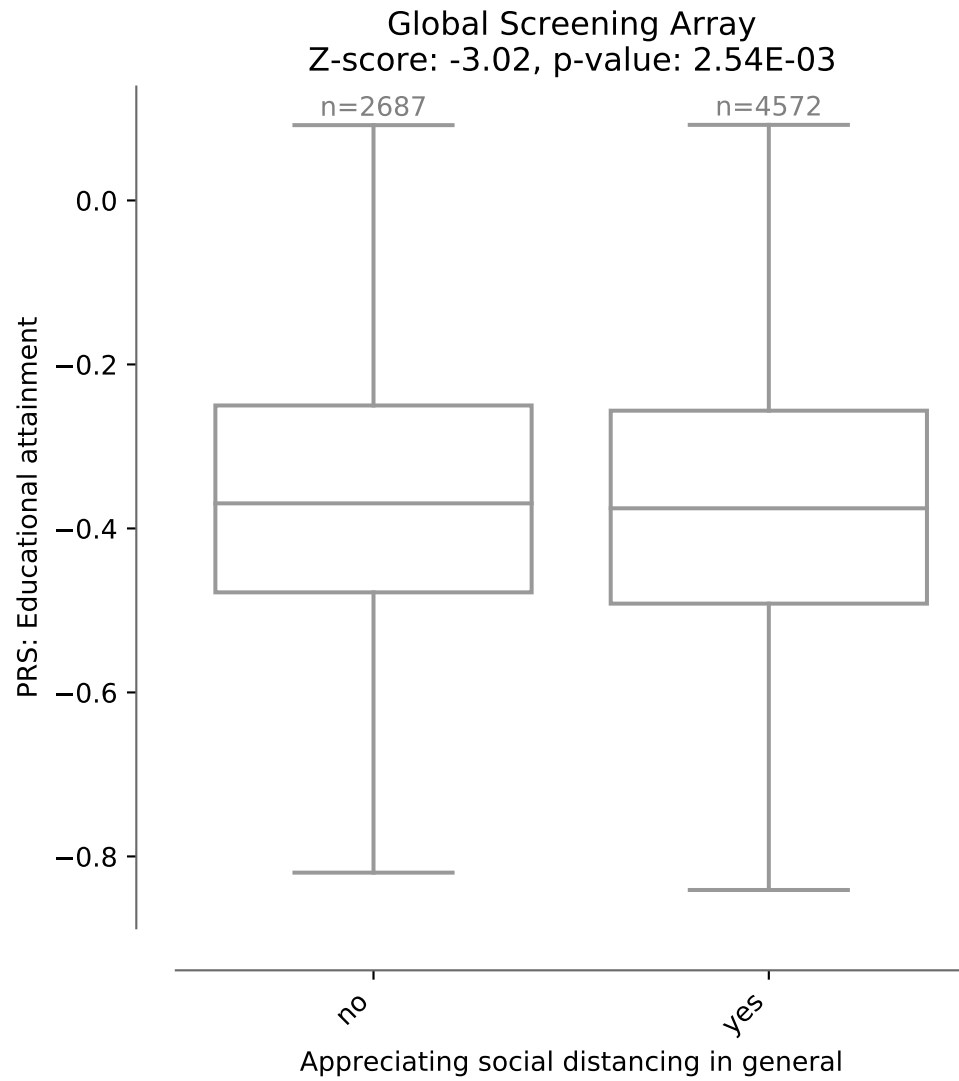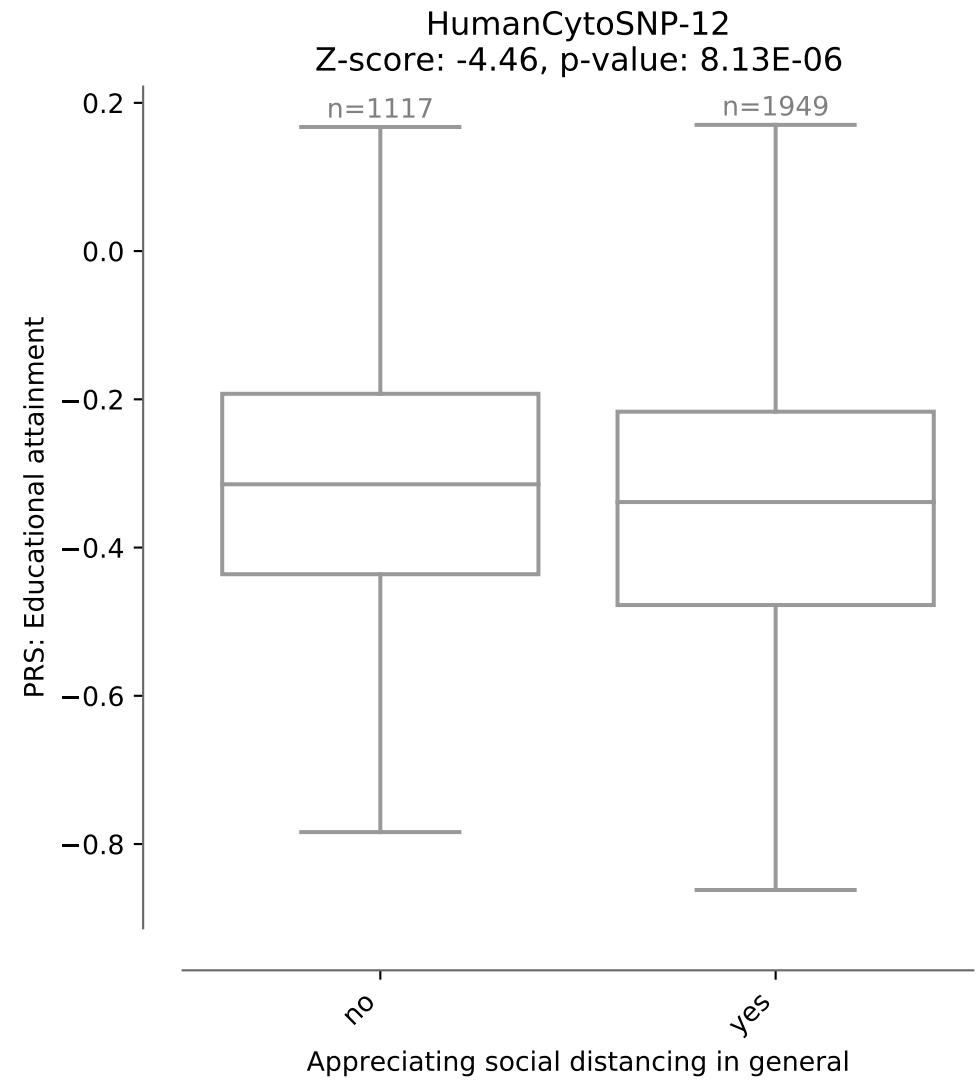

Finding that reduced regular healthcare in favour of COVID-19 patients is justified

PGS: Educational attainment

Meta analysis Z-score: 8.07, p-value: 6.90E-16

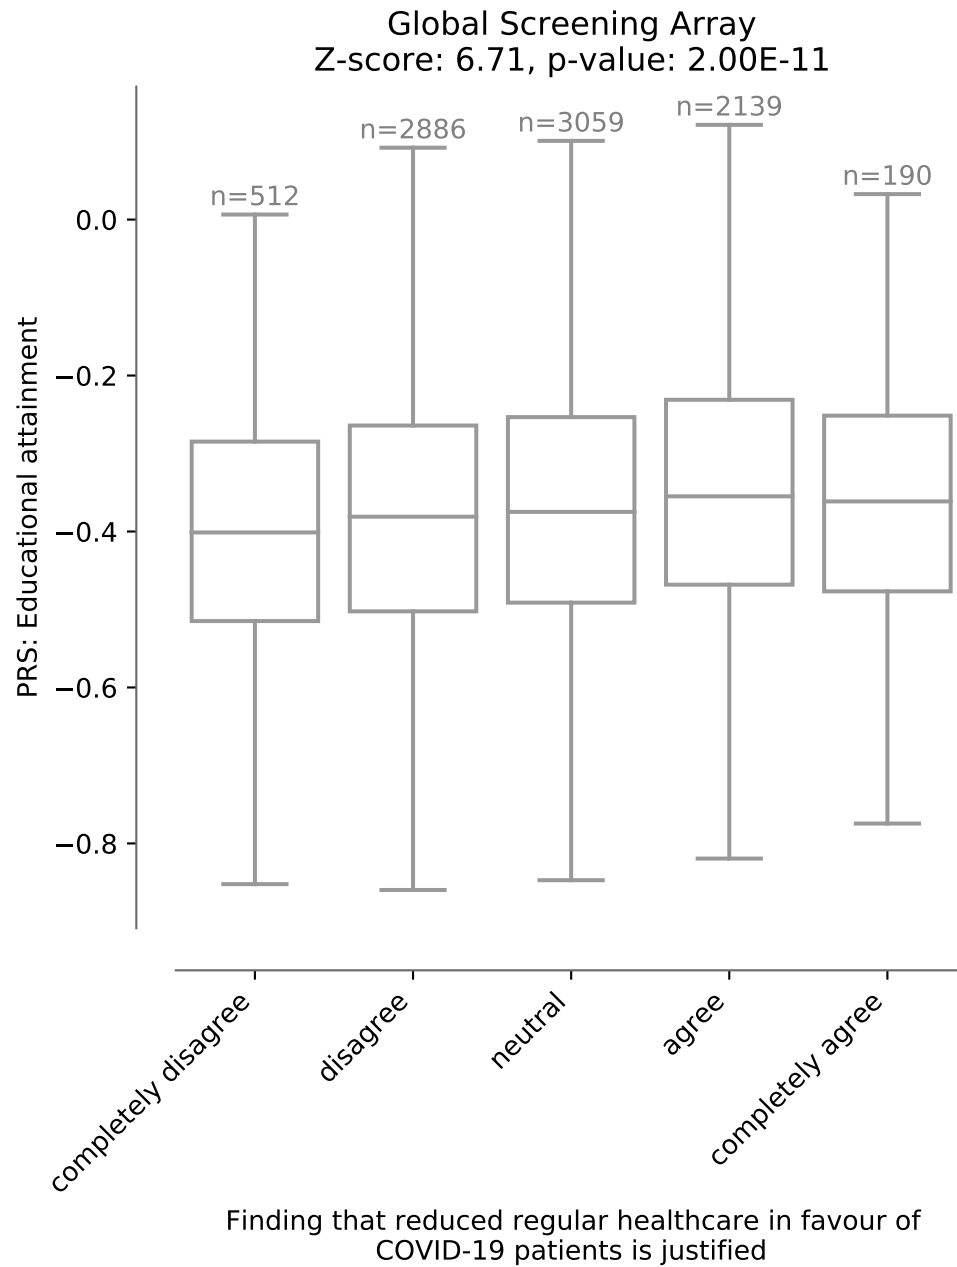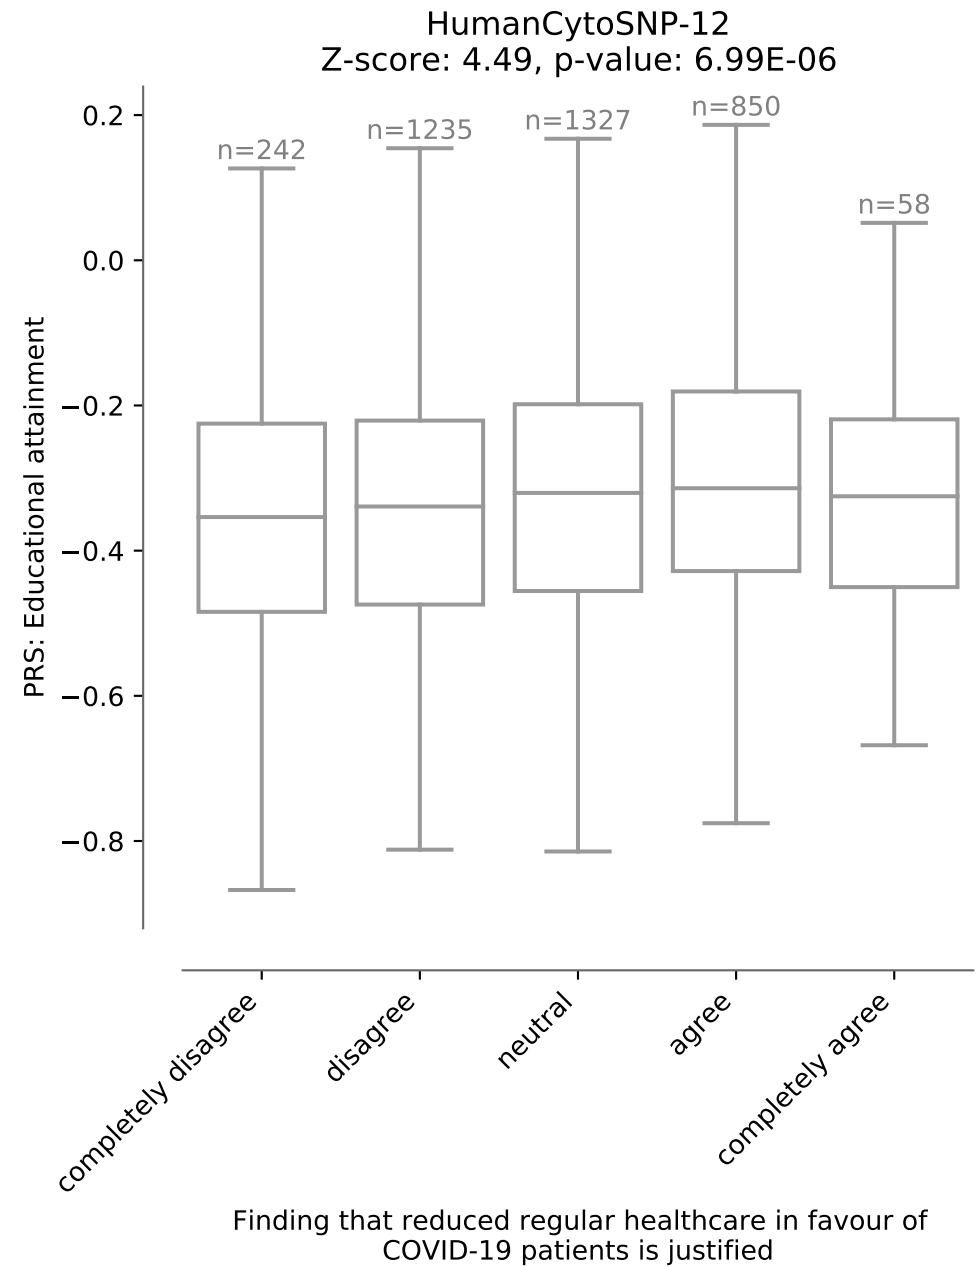

Finding that reduced regular healthcare in favour of COVID-19 patients is justified

PGS: Life satisfaction

Meta analysis Z-score: 5.49, p-value: 4.03E-08

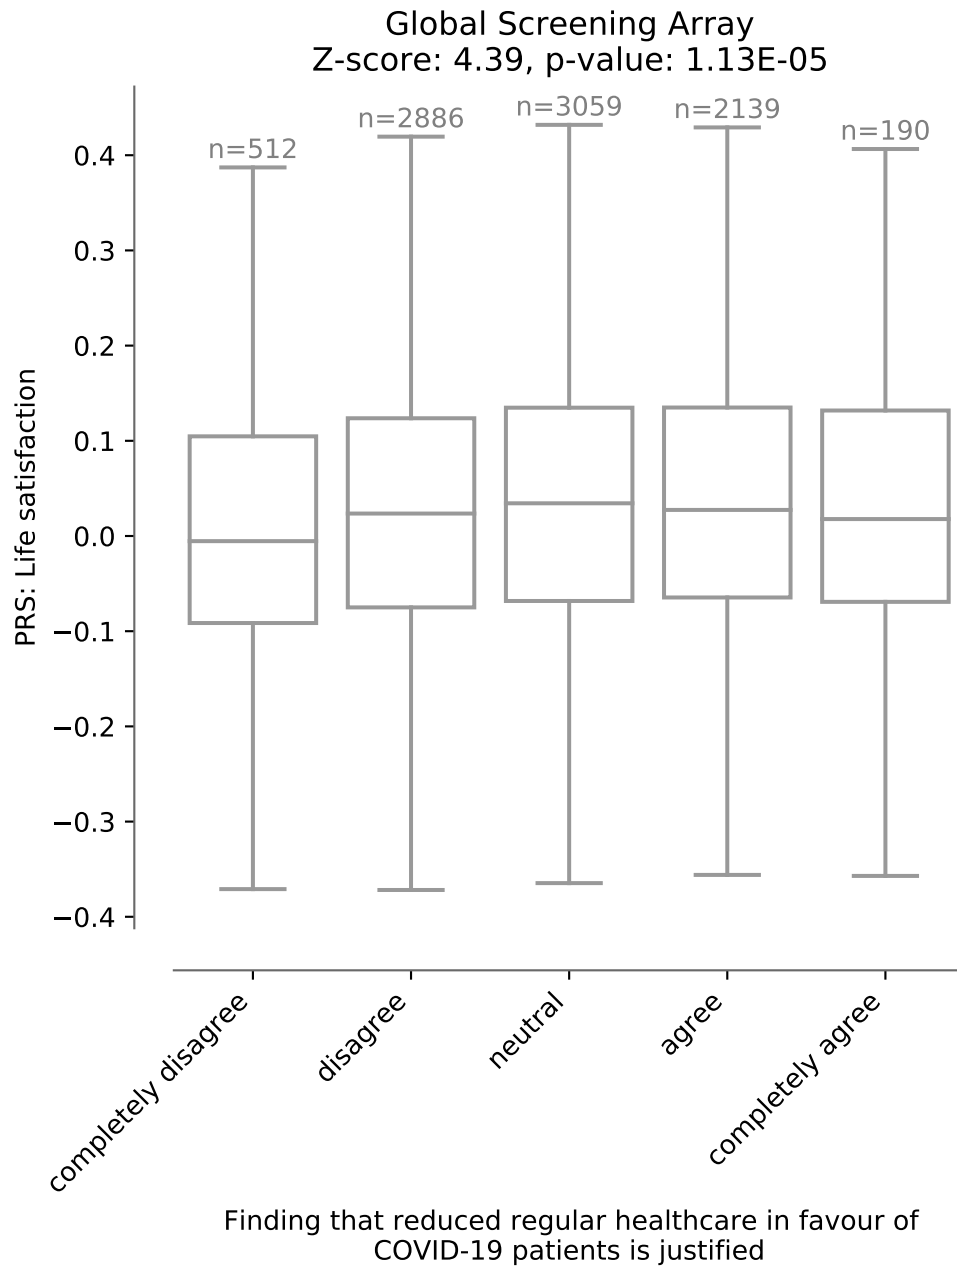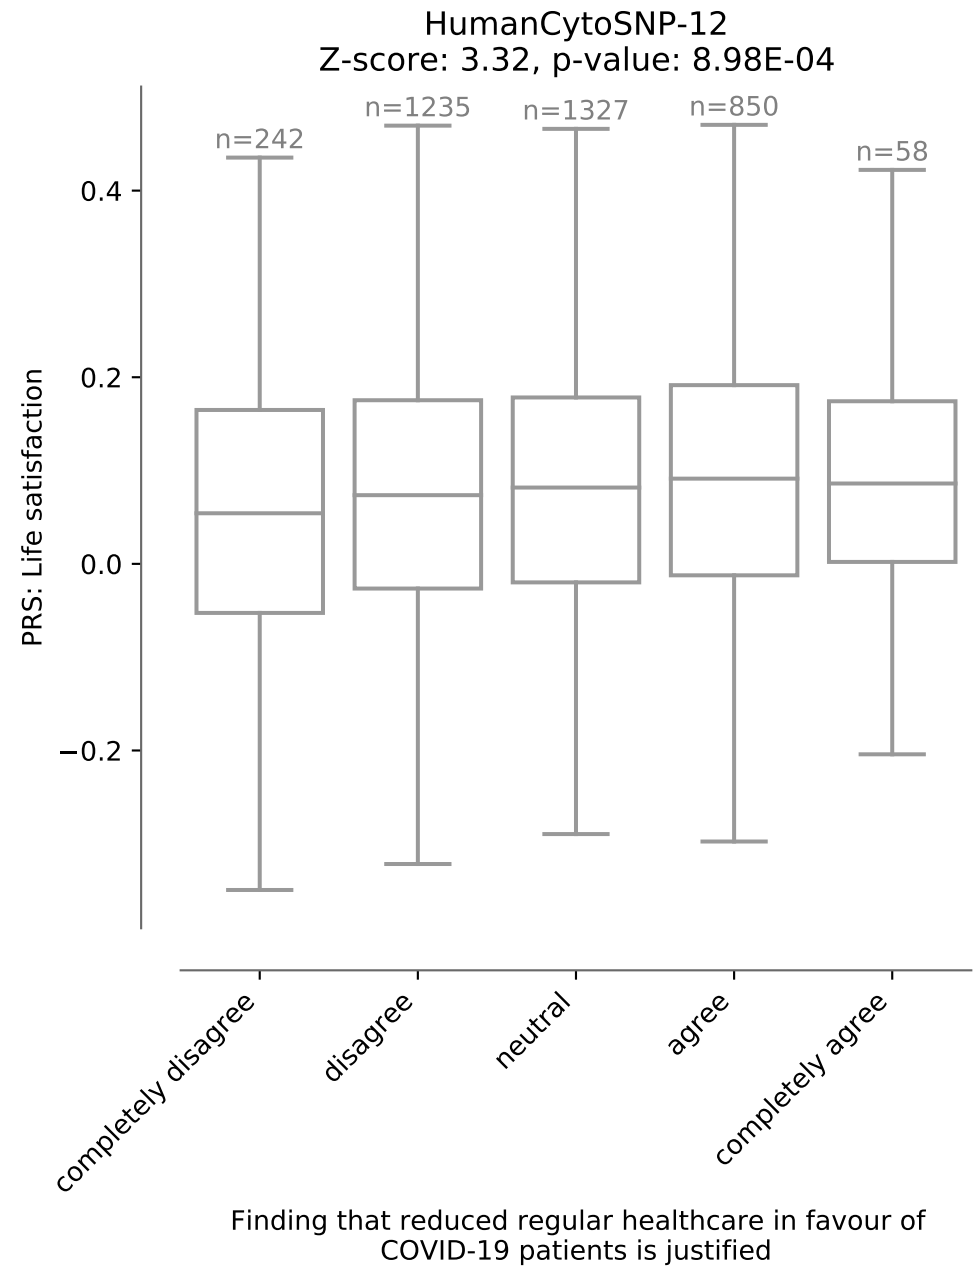



Felt excluded by society  
PGS: Educational attainment  
Meta analysis Z-score: -5.41, p-value: 6.25E-08

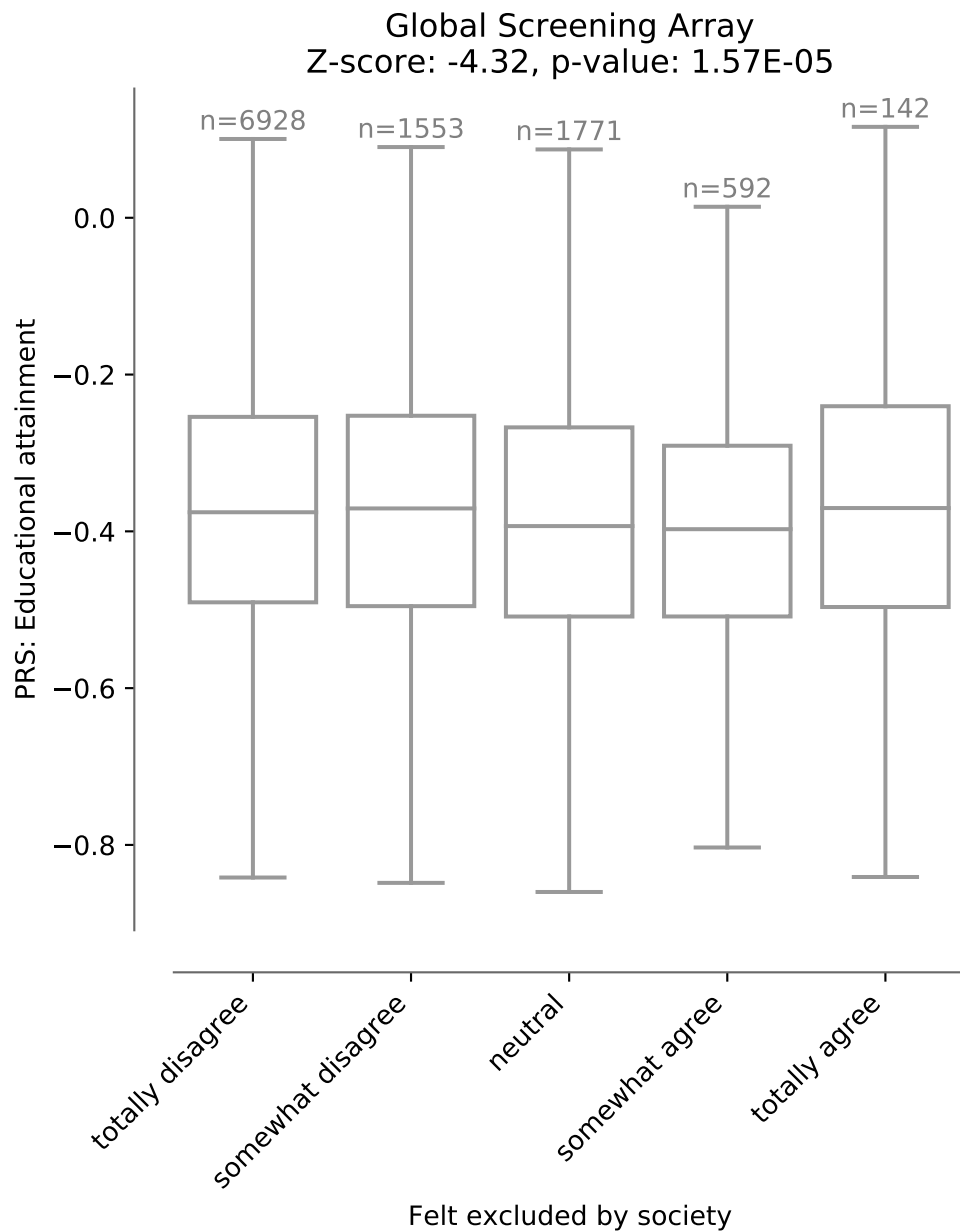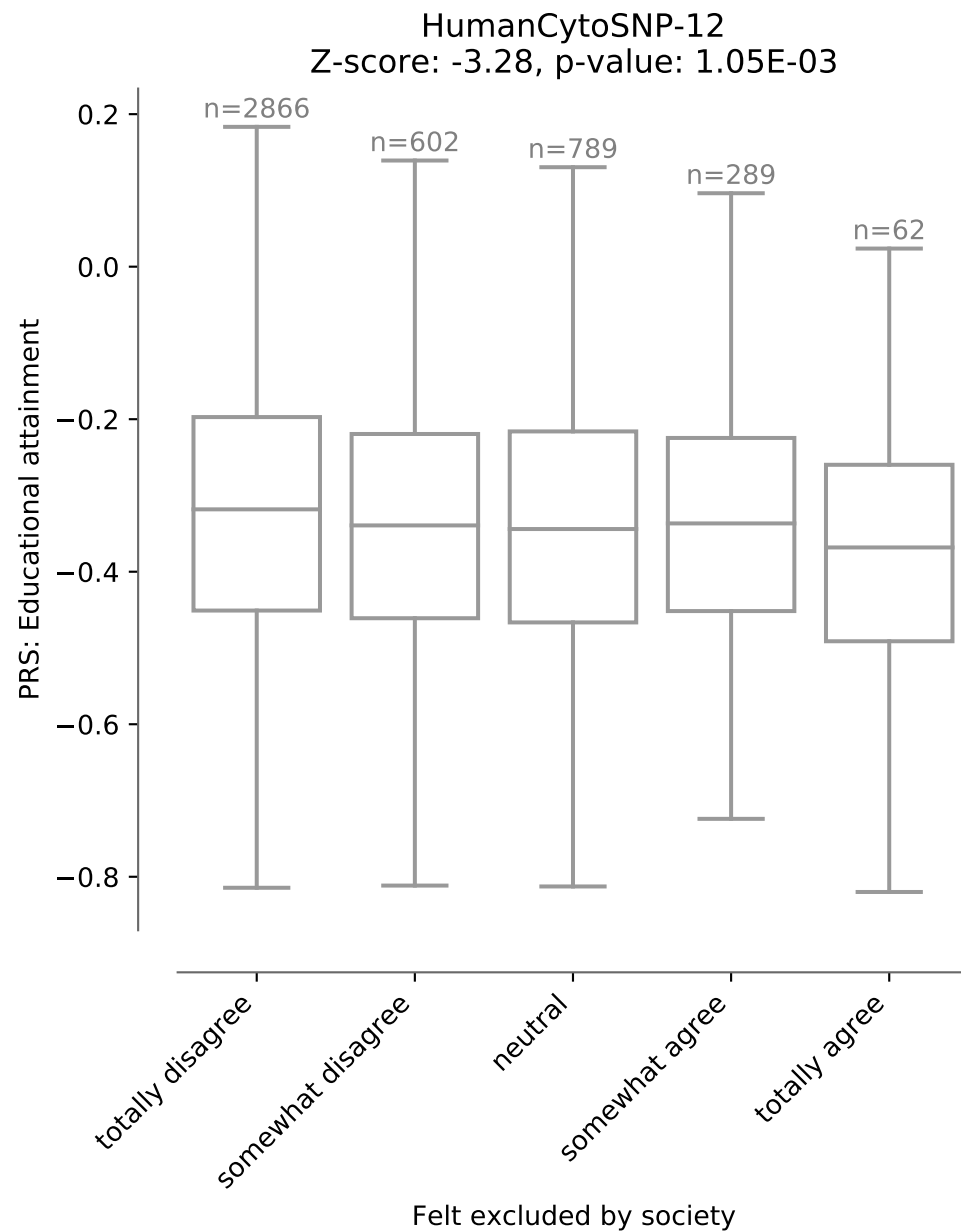

Not feeling obligated to comply with measures  
PGS: Educational attainment  
Meta analysis Z-score: -5.38, p-value: 7.37E-08

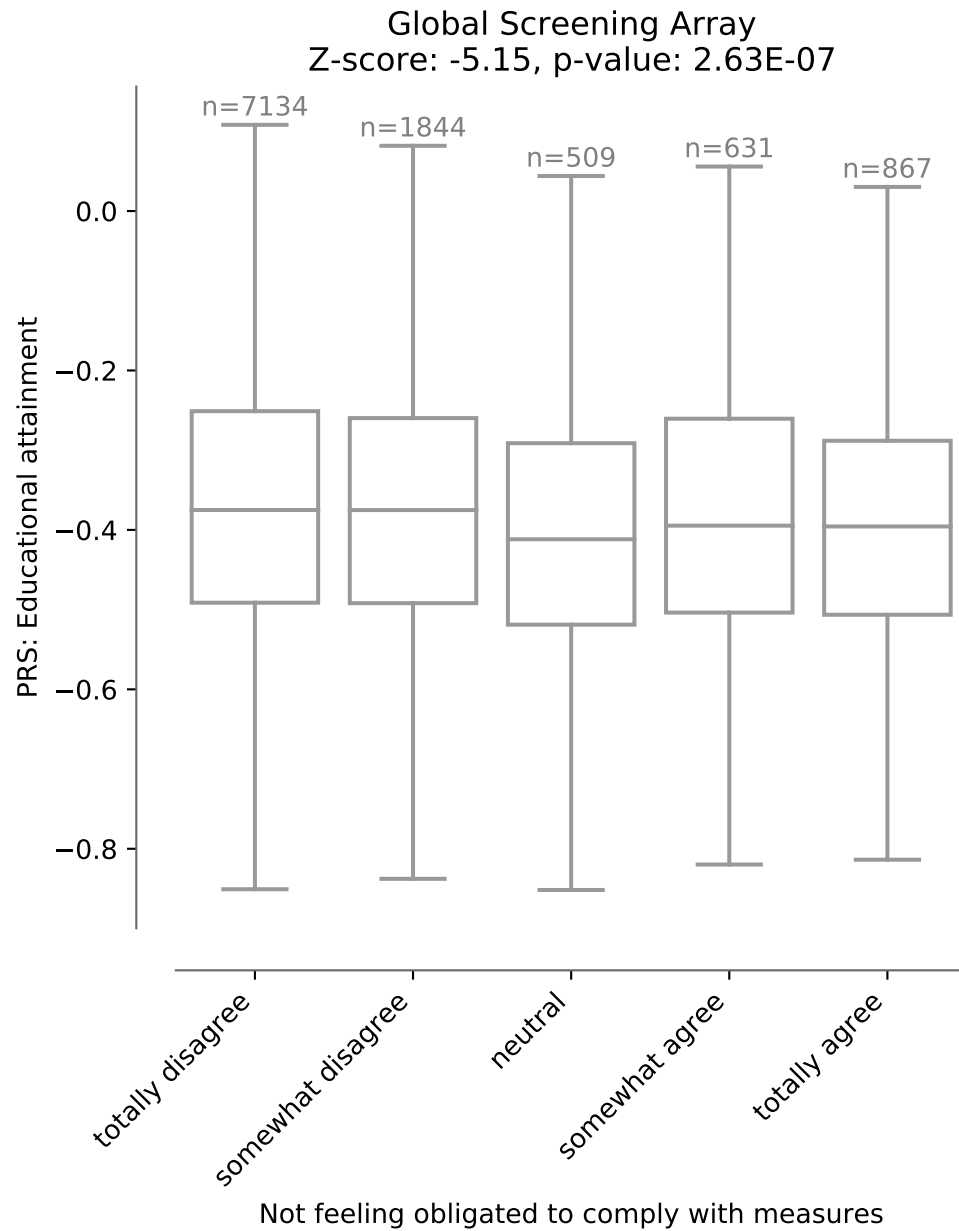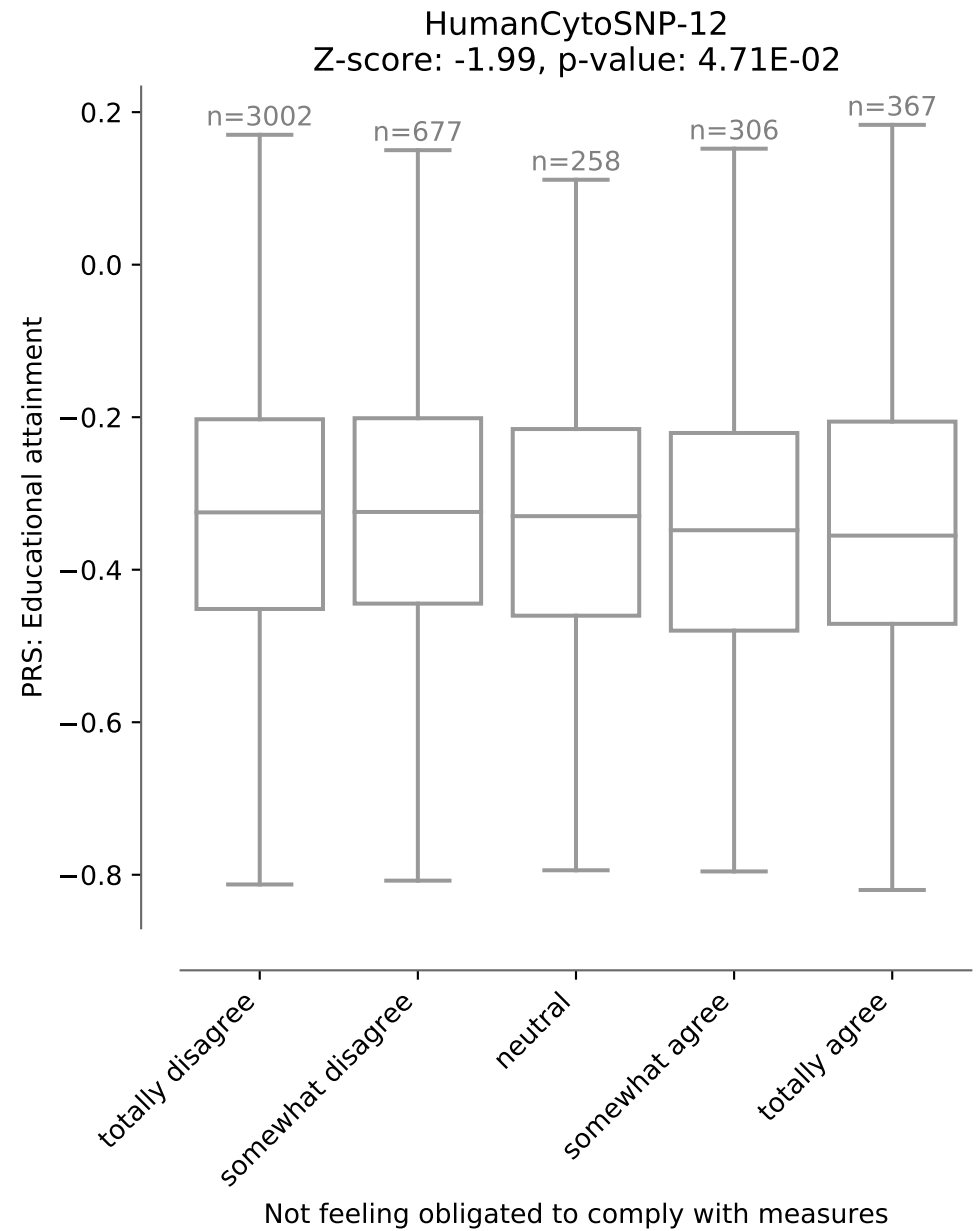

Felt connected to all Dutch people  
PGS: Autism spectrum disorder (ASD)  
Meta analysis Z-score: -5.35, p-value: 8.99E-08

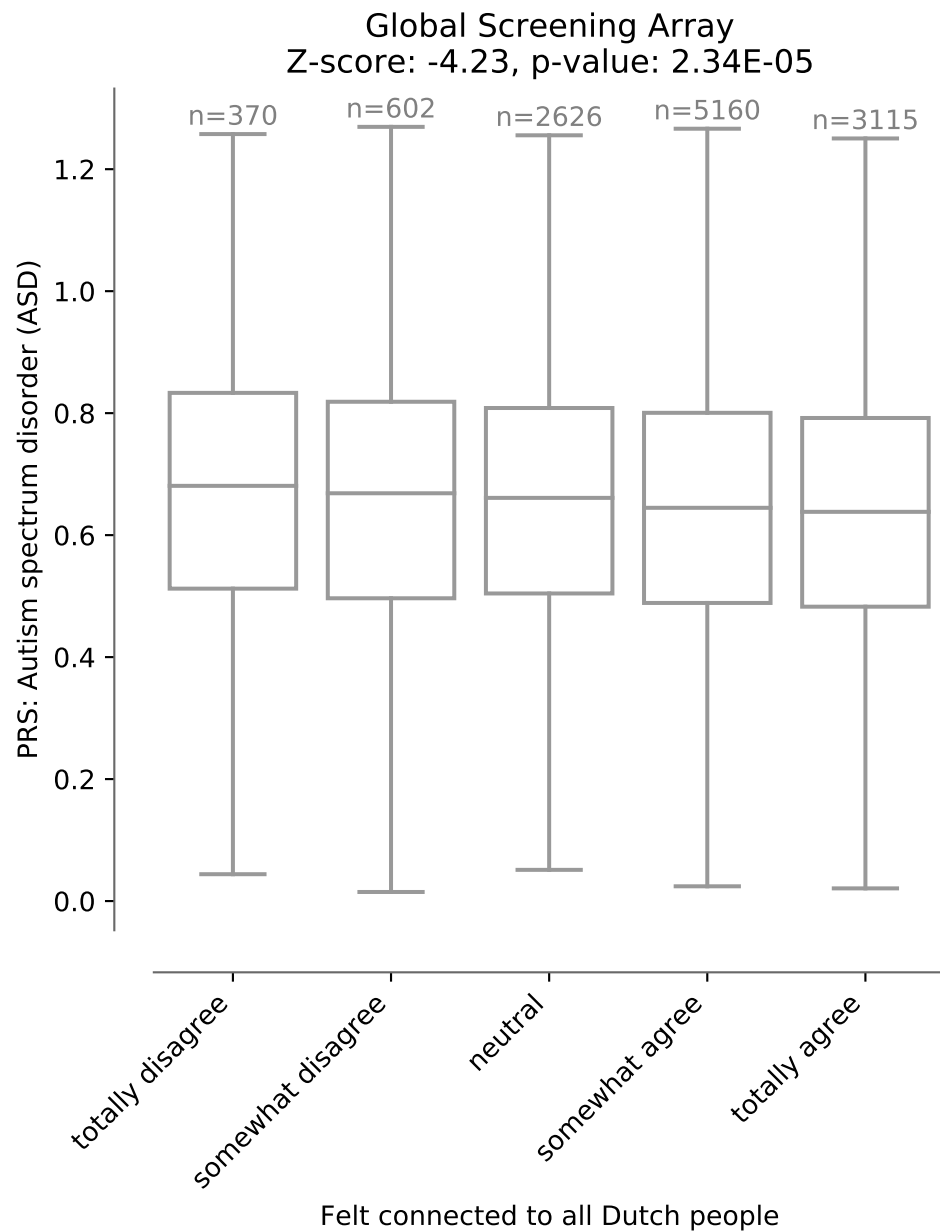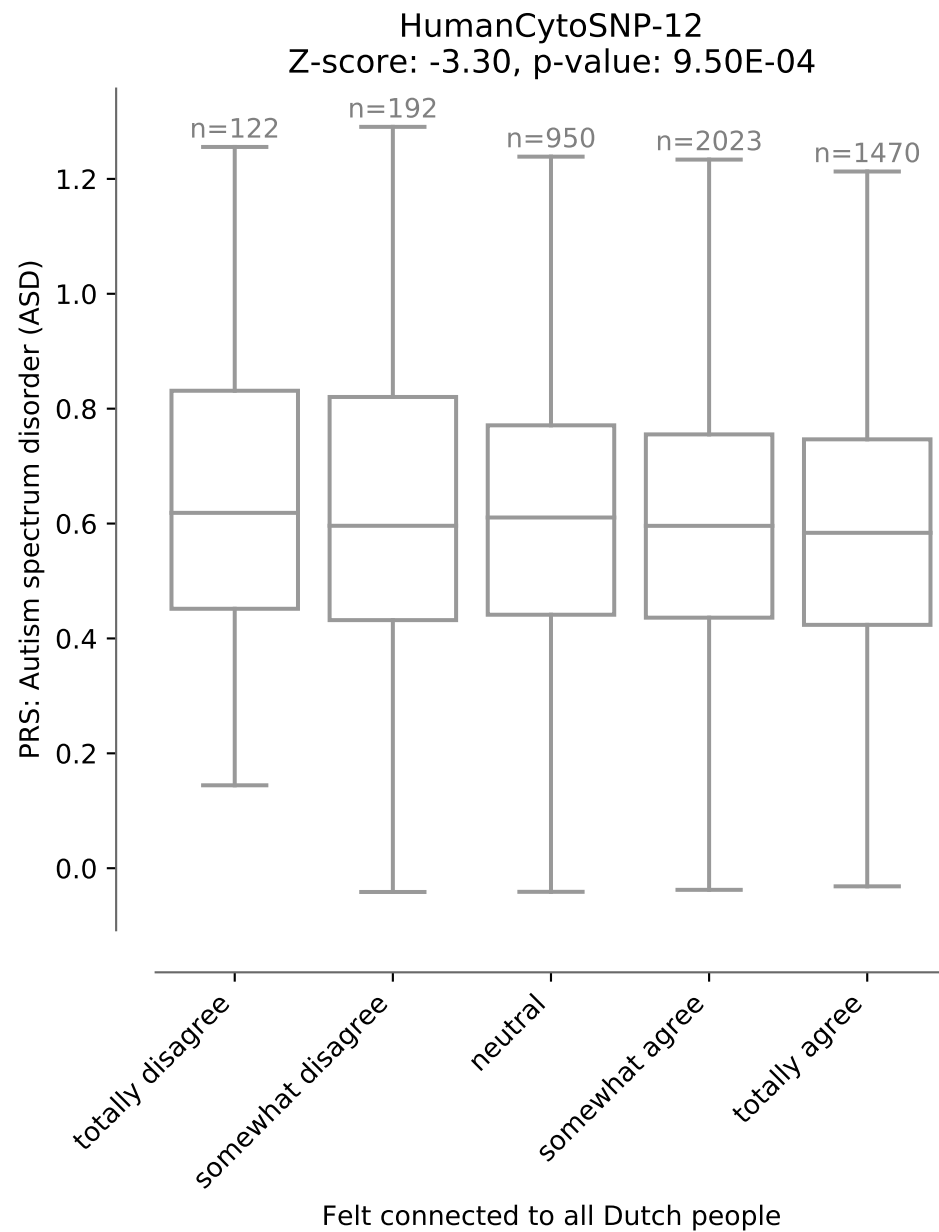

Felt connected to all Dutch people  
PGS: Educational attainment  
Meta analysis Z-score: -5.03, p-value: 4.91E-07

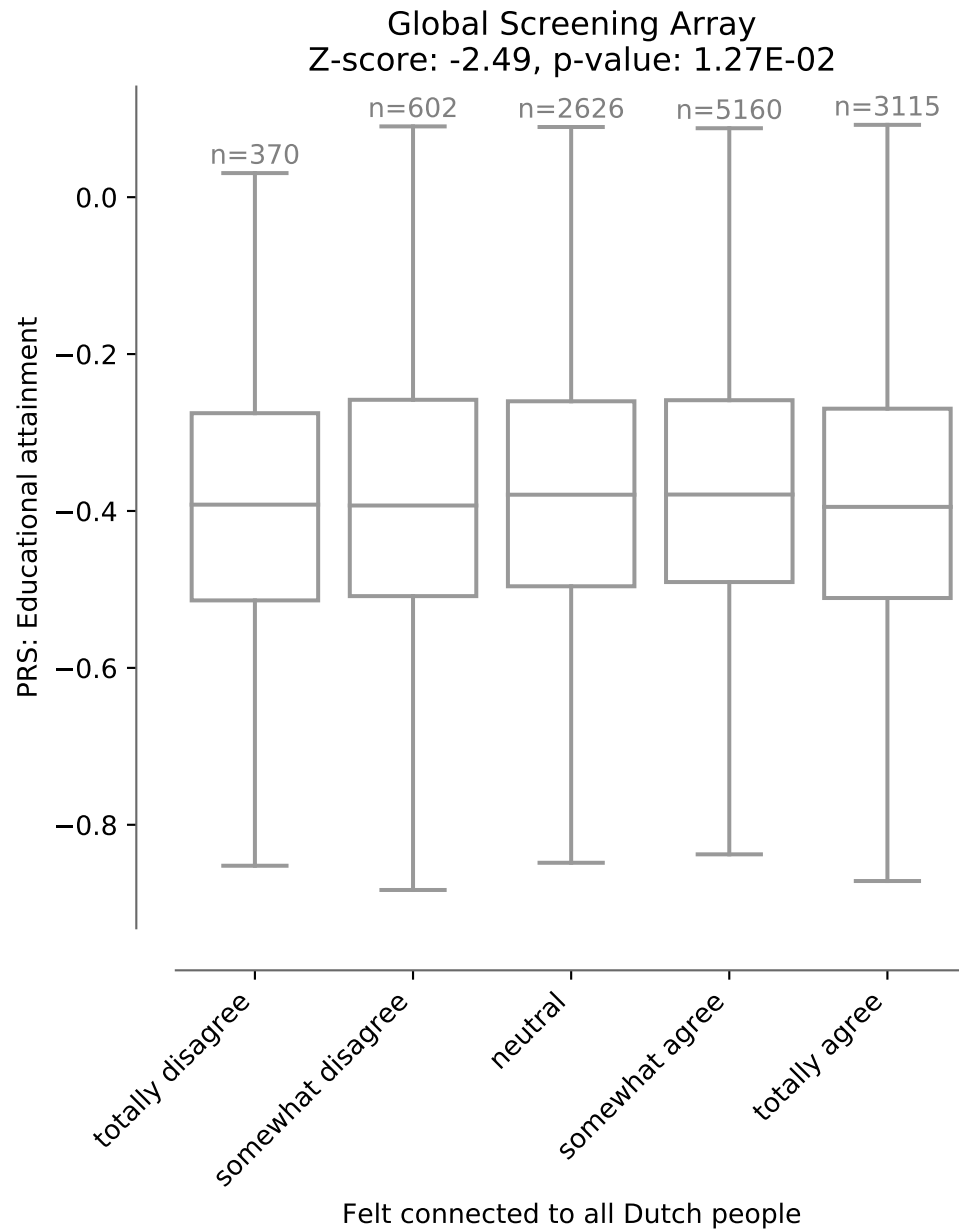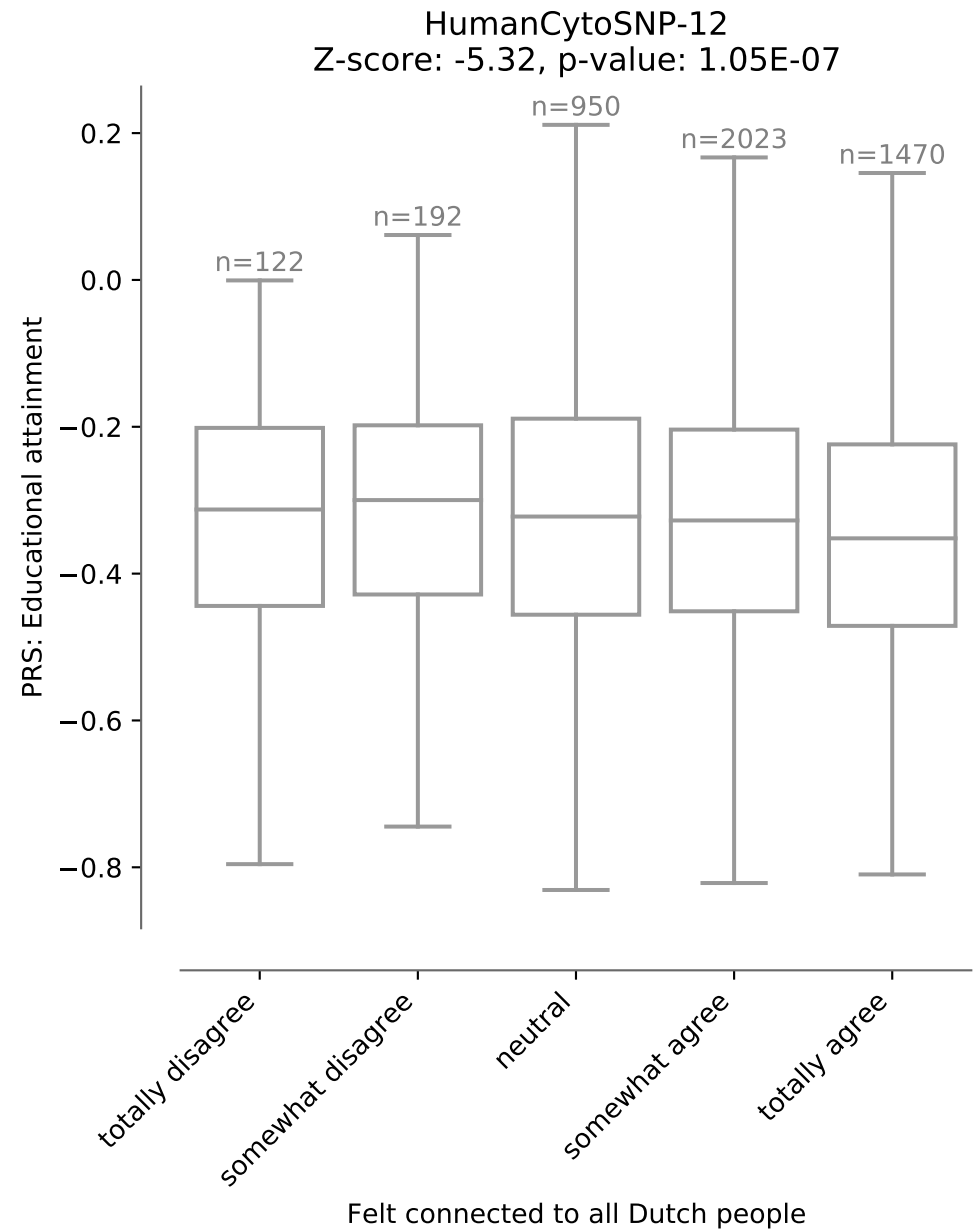

Felt fine  
PGS: Depression  
Meta analysis Z-score: -4.90, p-value: 9.41E-07

Global Screening Array  
Z-score: -4.06, p-value: 4.86E-05

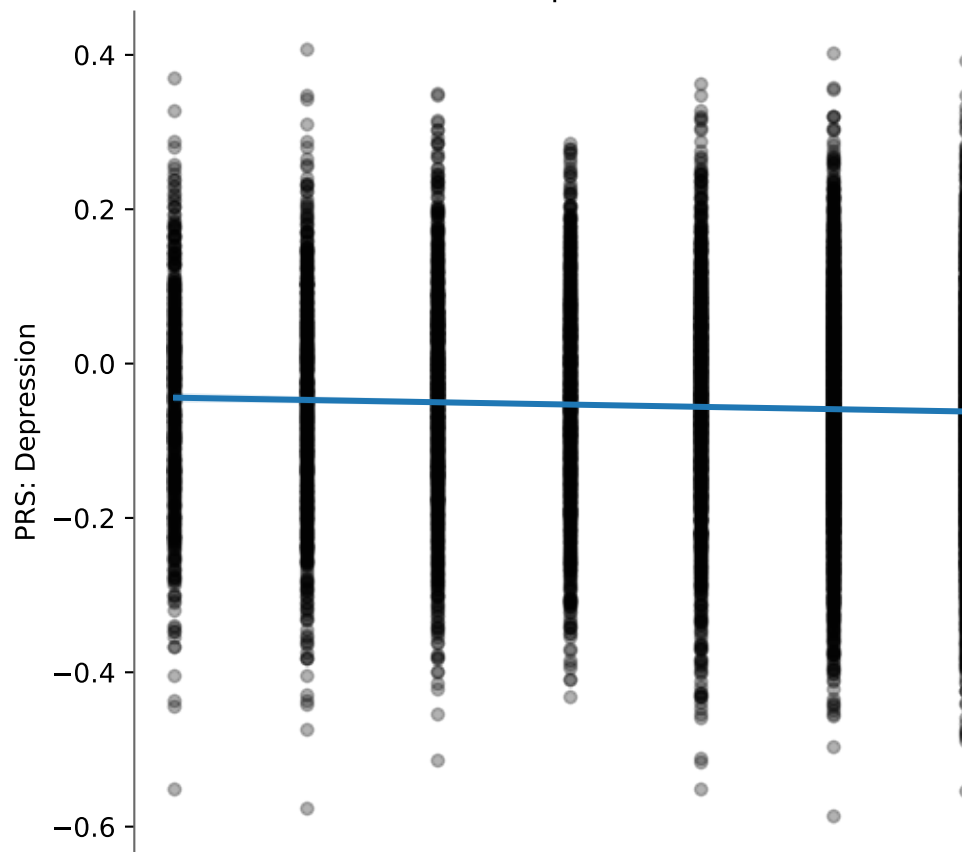

1 (no, that is not true)

2

3

4

5

6

7 (yes, that is true)

Felt fine

HumanCytoSNP-12  
Z-score: -2.75, p-value: 5.90E-03

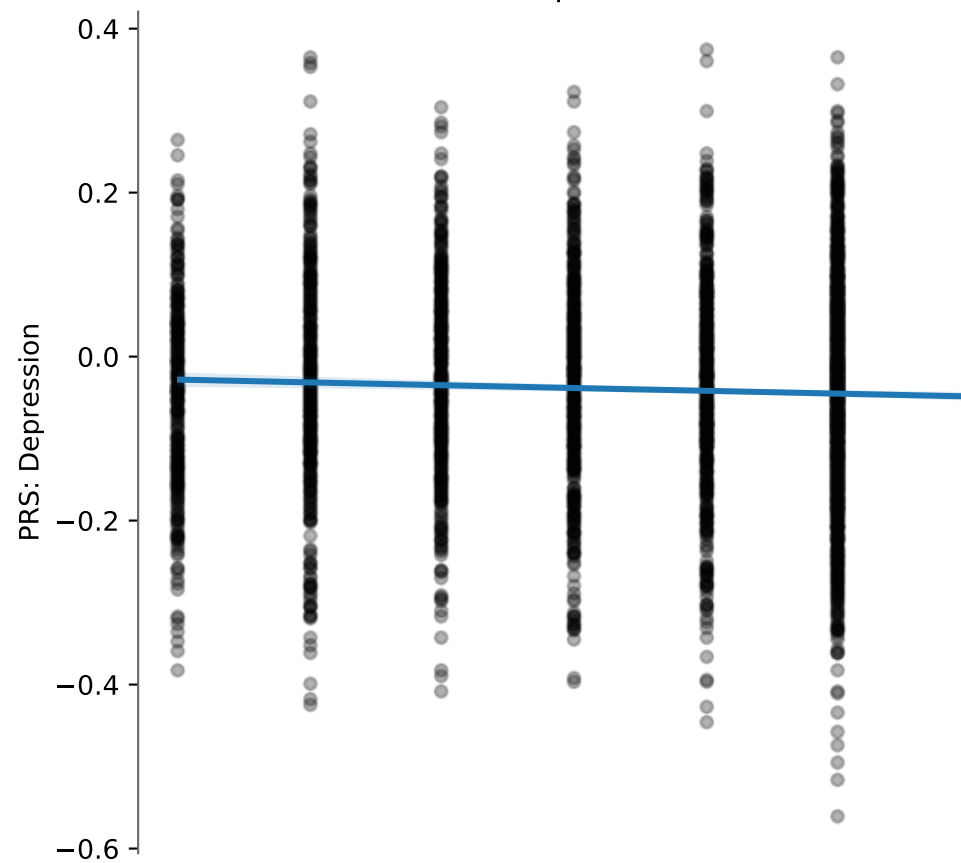

1 (no, that is not true)

2

3

4

5

6

7 (yes, that is true)

Felt fine

Felt fine  
PGS: Life satisfaction  
Meta analysis Z-score: 7.95, p-value: 1.84E-15

Global Screening Array  
Z-score: 6.82, p-value: 9.25E-12

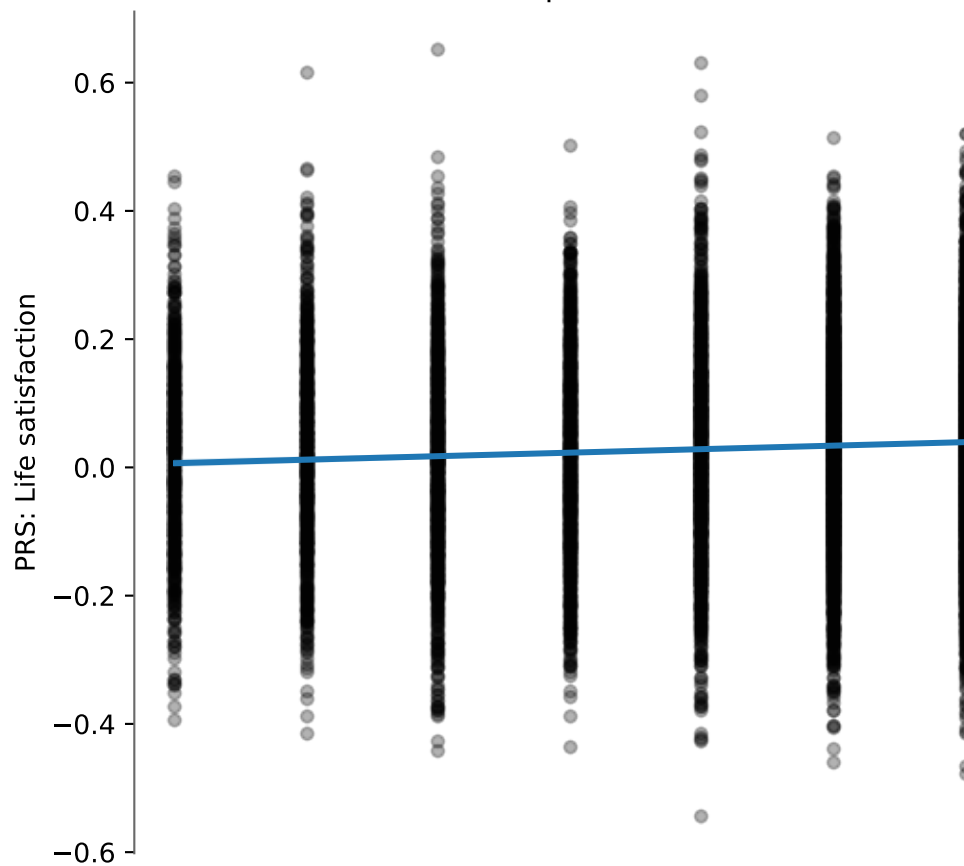

Felt fine

HumanCytoSNP-12  
Z-score: 4.08, p-value: 4.55E-05

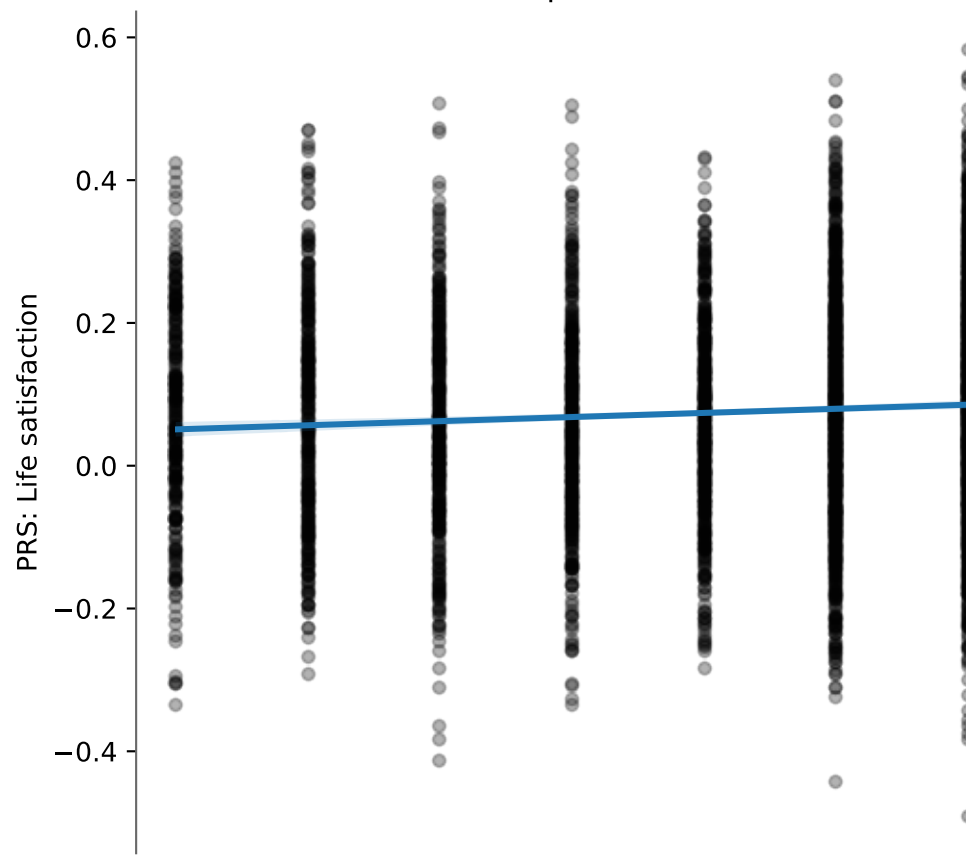

Felt fine

1 (no, that is not true)

7 (yes, that is true)

1 (no, that is not true)

7 (yes, that is true)

Felt fine  
PGS: Neuroticism  
Meta analysis Z-score: -5.74, p-value: 9.40E-09

Global Screening Array  
Z-score: -5.14, p-value: 2.80E-07

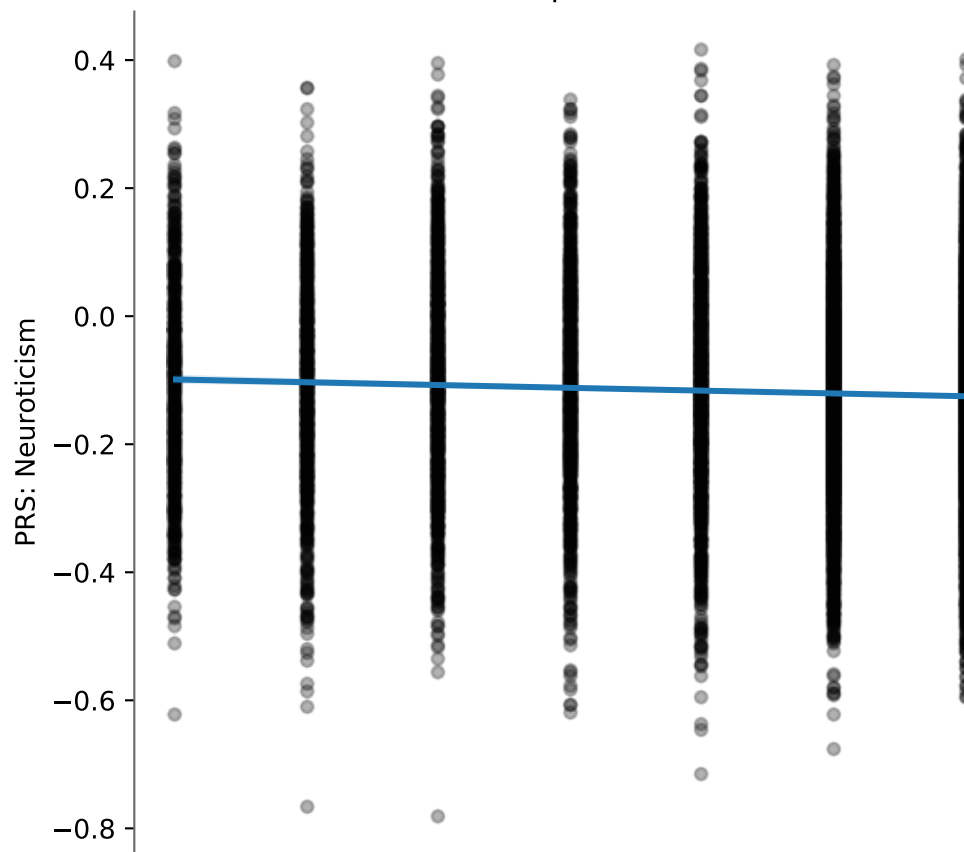

1 (no, that is not true)

2

3

4

5

6

7 (yes, that is true)

Felt fine

HumanCytoSNP-12  
Z-score: -2.60, p-value: 9.39E-03

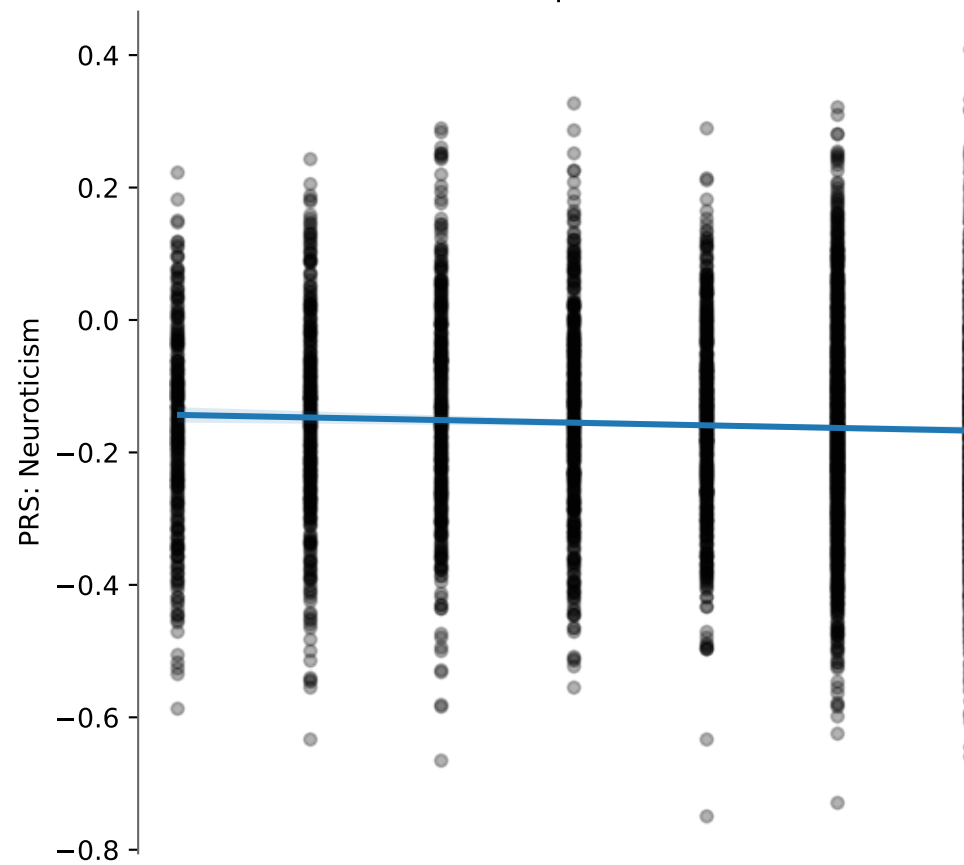

1 (no, that is not true)

2

3

4

5

6

7 (yes, that is true)

Felt fine

Felt fine  
PGS: Schizophrenia  
Meta analysis Z-score: -4.75, p-value: 2.06E-06

Global Screening Array  
Z-score: -3.63, p-value: 2.79E-04

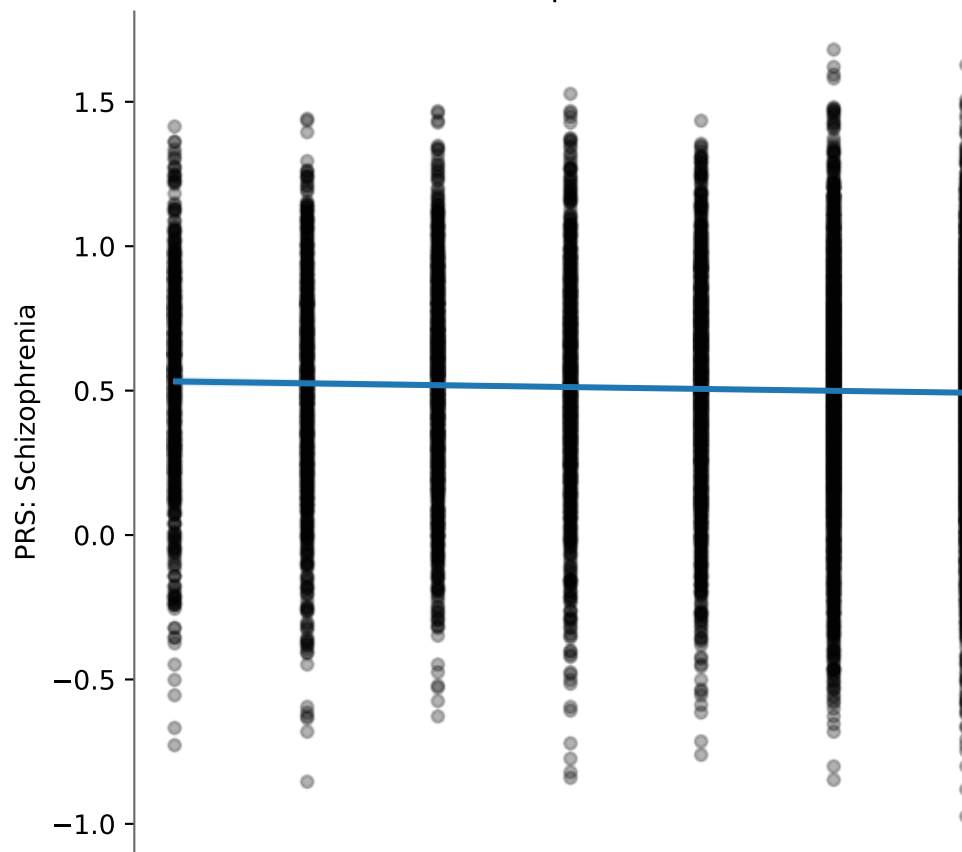

1 (no, that is not true)

2

3

4

5

6

7 (yes, that is true)

Felt fine

HumanCytoSNP-12  
Z-score: -3.14, p-value: 1.69E-03

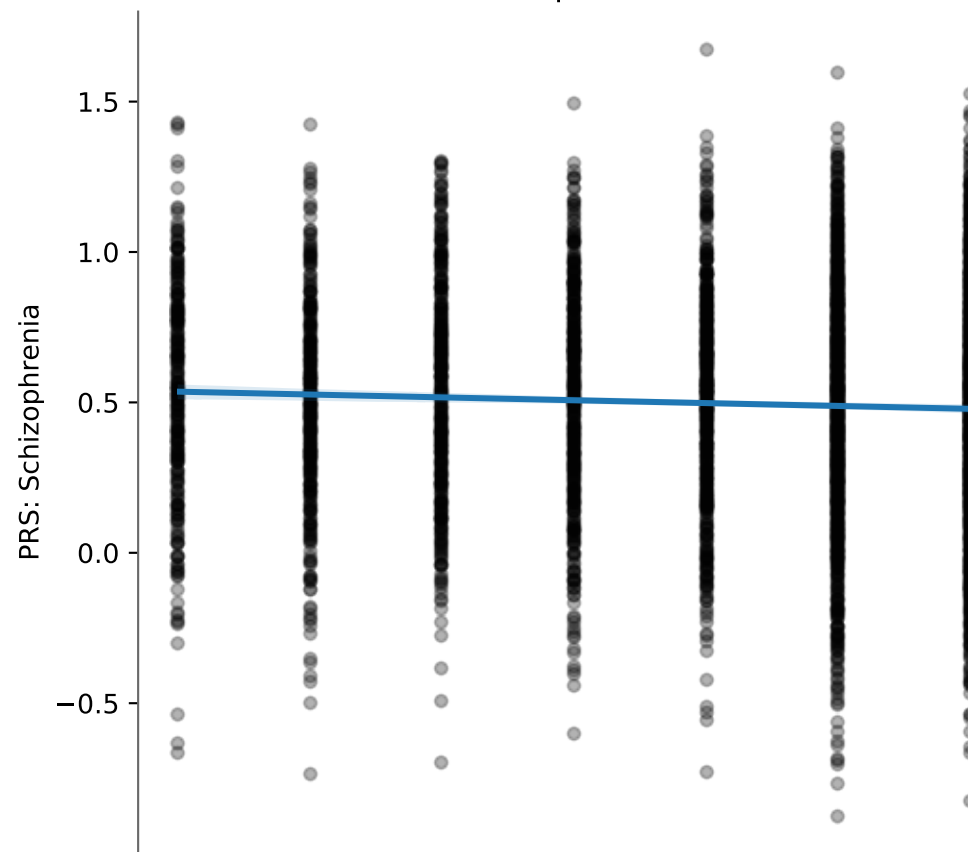

1 (no, that is not true)

2

3

4

5

6

7 (yes, that is true)

Felt fine



Felt tired  
PGS: Depression  
Meta analysis Z-score: 6.64, p-value: 3.23E-11

Global Screening Array  
Z-score: 5.03, p-value: 4.79E-07

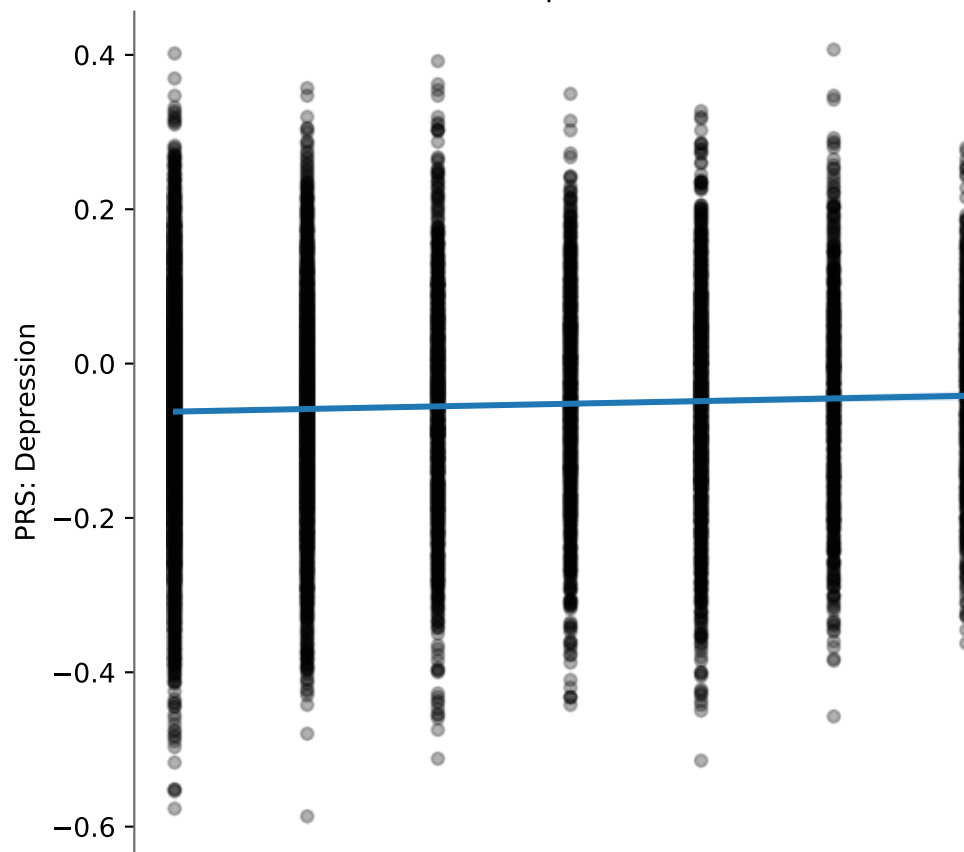

Felt tired

HumanCytoSNP-12  
Z-score: 4.44, p-value: 8.94E-06

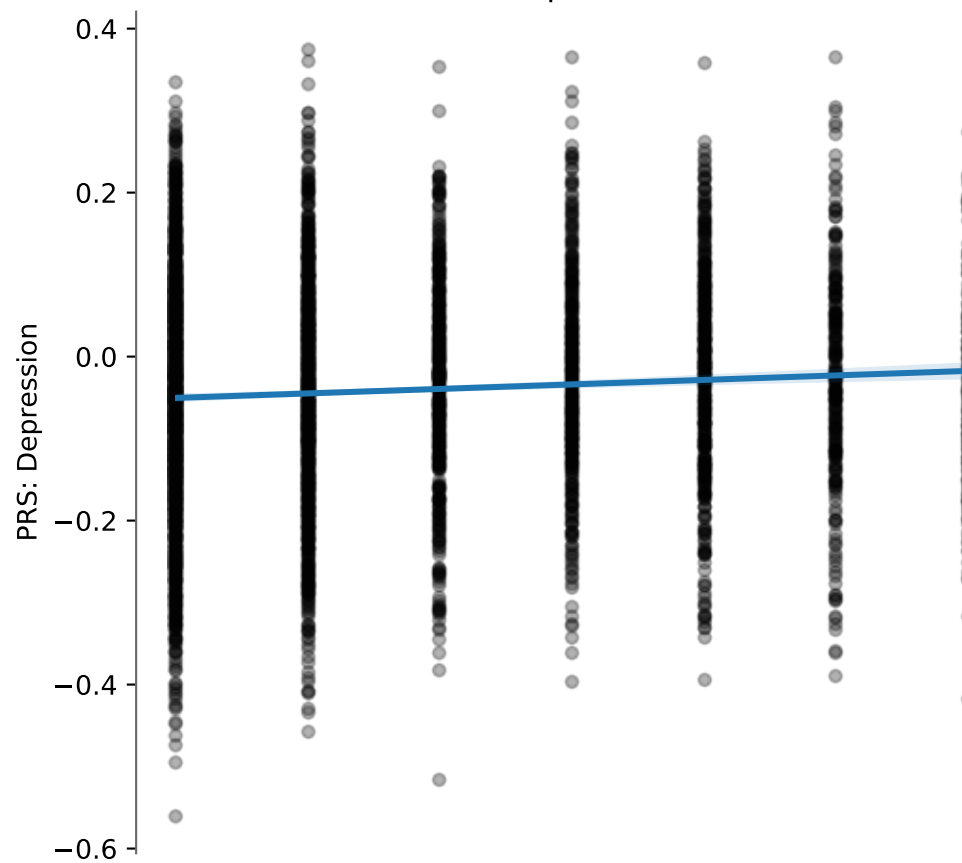

Felt tired

1 (no, that is not true)

7 (yes, that is true)

1 (no, that is not true)

7 (yes, that is true)

Felt tired  
PGS: Life satisfaction  
Meta analysis Z-score: -10.22, p-value: 1.65E-24

Global Screening Array  
Z-score: -8.56, p-value: 1.16E-17

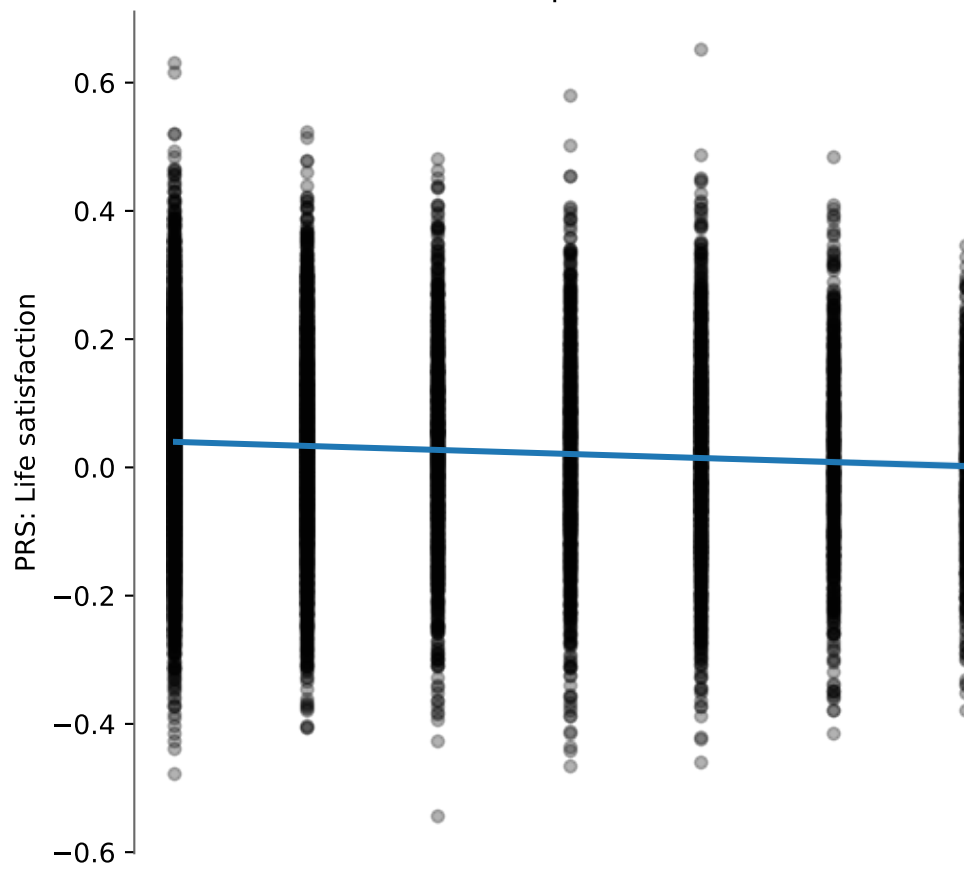

Felt tired

HumanCytoSNP-12  
Z-score: -5.55, p-value: 2.78E-08

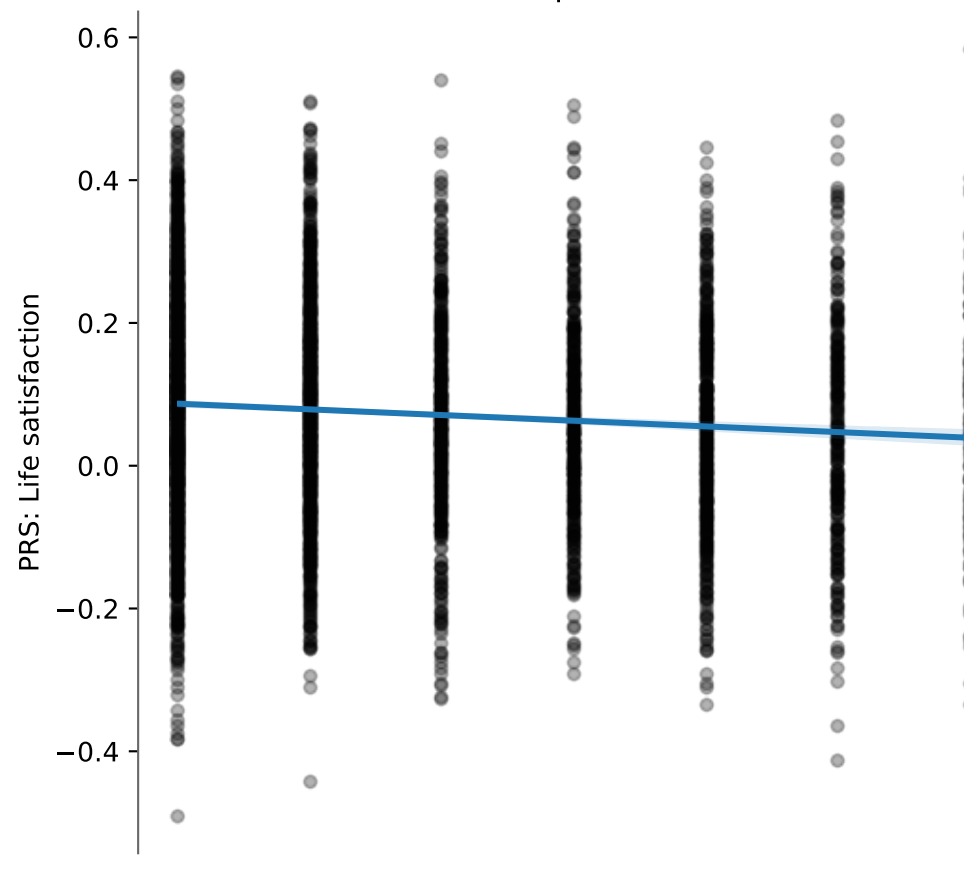

Felt tired

1 (no, that is not true)

2

3

4

5

6

7 (yes, that is true)

1 (no, that is not true)

2

3

4

5

6

7 (yes, that is true)

Felt tired  
PGS: Neuroticism  
Meta analysis Z-score: 8.29, p-value: 1.17E-16

Global Screening Array  
Z-score: 7.26, p-value: 3.88E-13

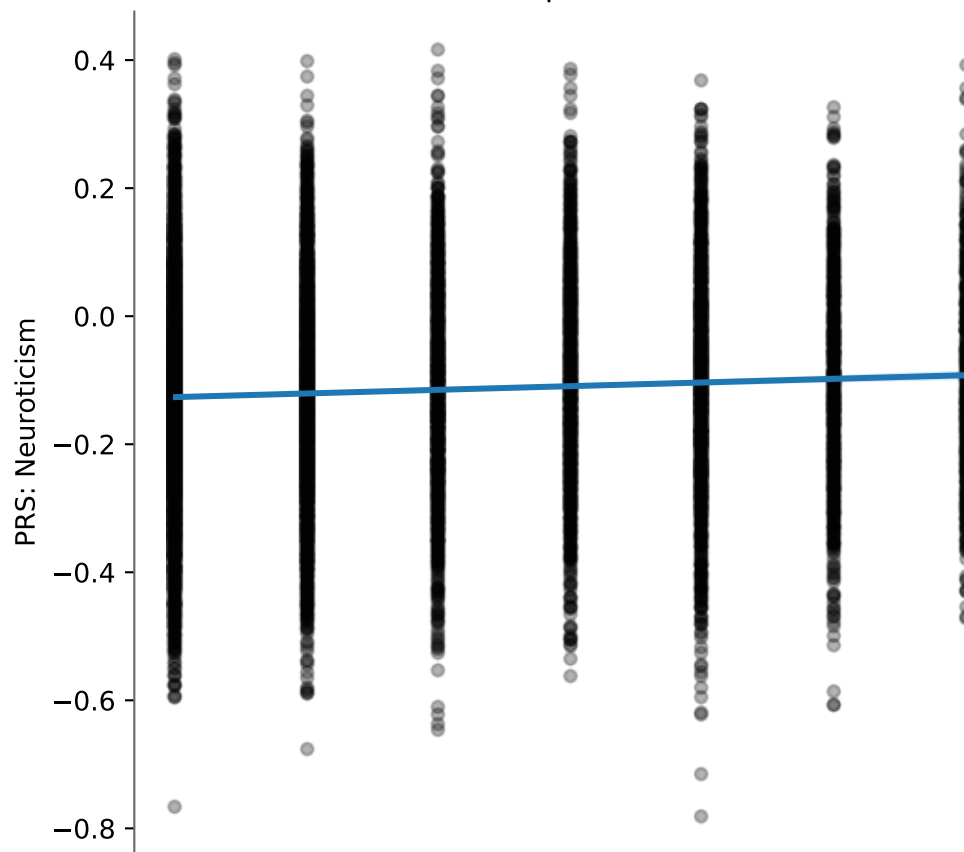

1 (no, that is not true)

2

3

4

5

6

7 (yes, that is true)

Felt tired

HumanCytoSNP-12  
Z-score: 4.01, p-value: 6.14E-05

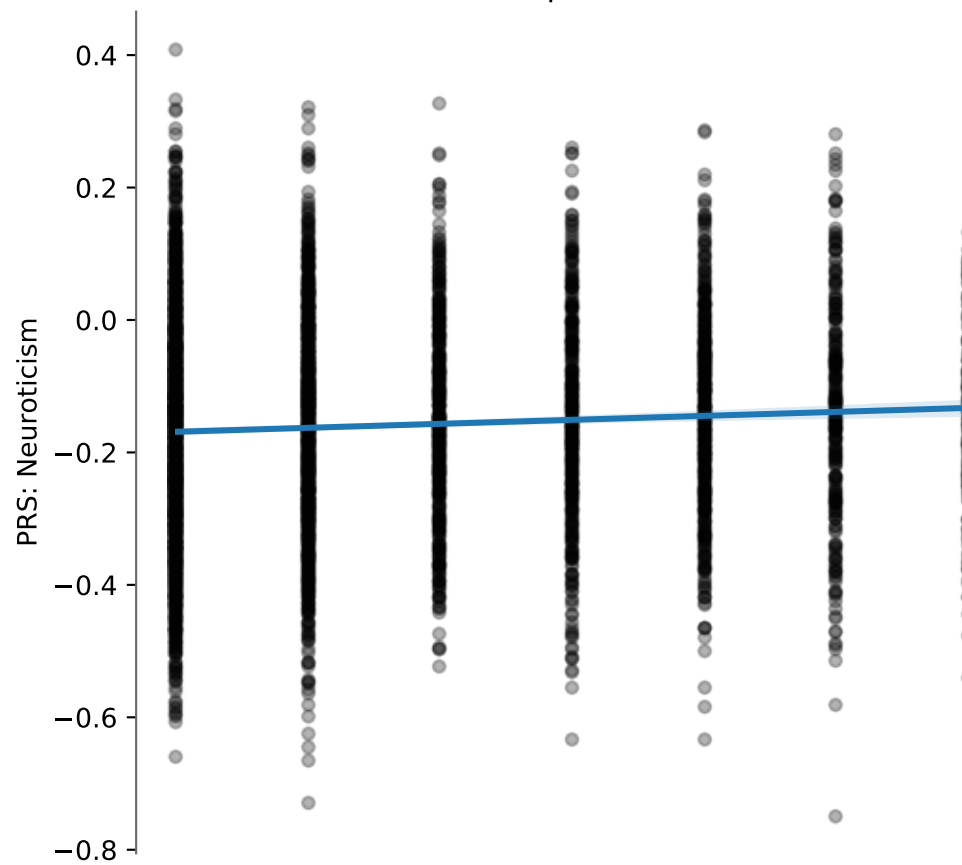

1 (no, that is not true)

2

3

4

5

6

7 (yes, that is true)

Felt tired

Felt tired  
PGS: Schizophrenia  
Meta analysis Z-score: 5.56, p-value: 2.71E-08

Global Screening Array  
Z-score: 4.80, p-value: 1.60E-06

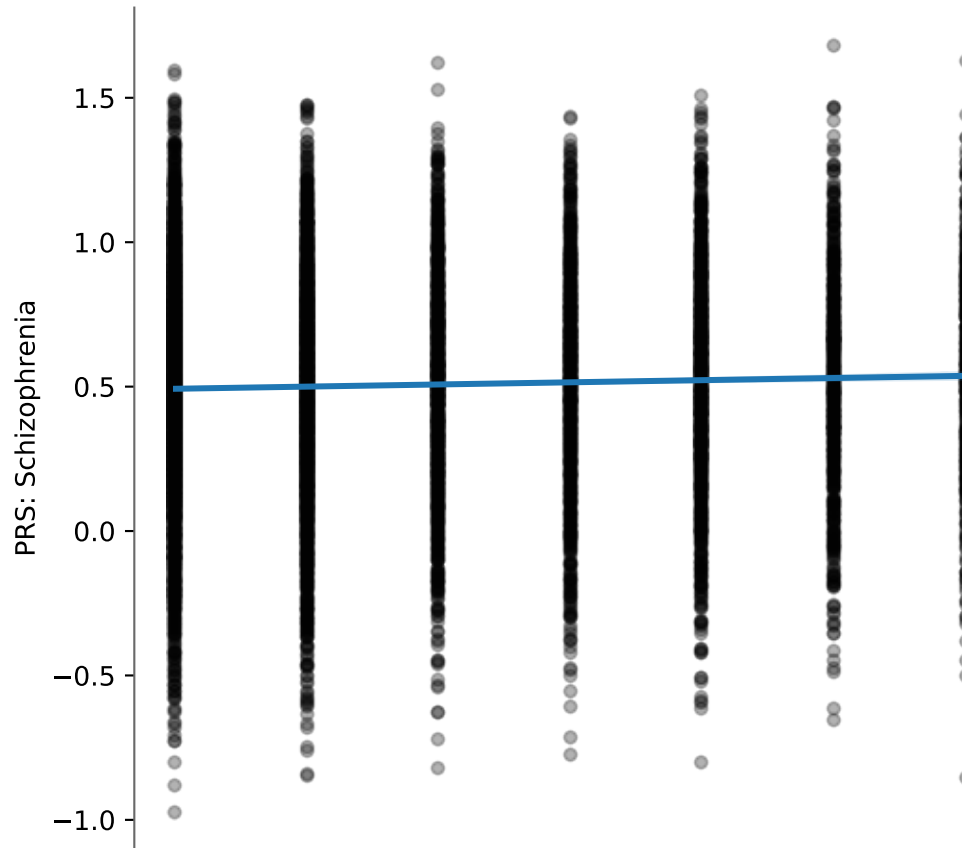

1 (no, that is not true)

2

3

4

5

6

7 (yes, that is true)

Felt tired

HumanCytoSNP-12  
Z-score: 2.81, p-value: 4.90E-03

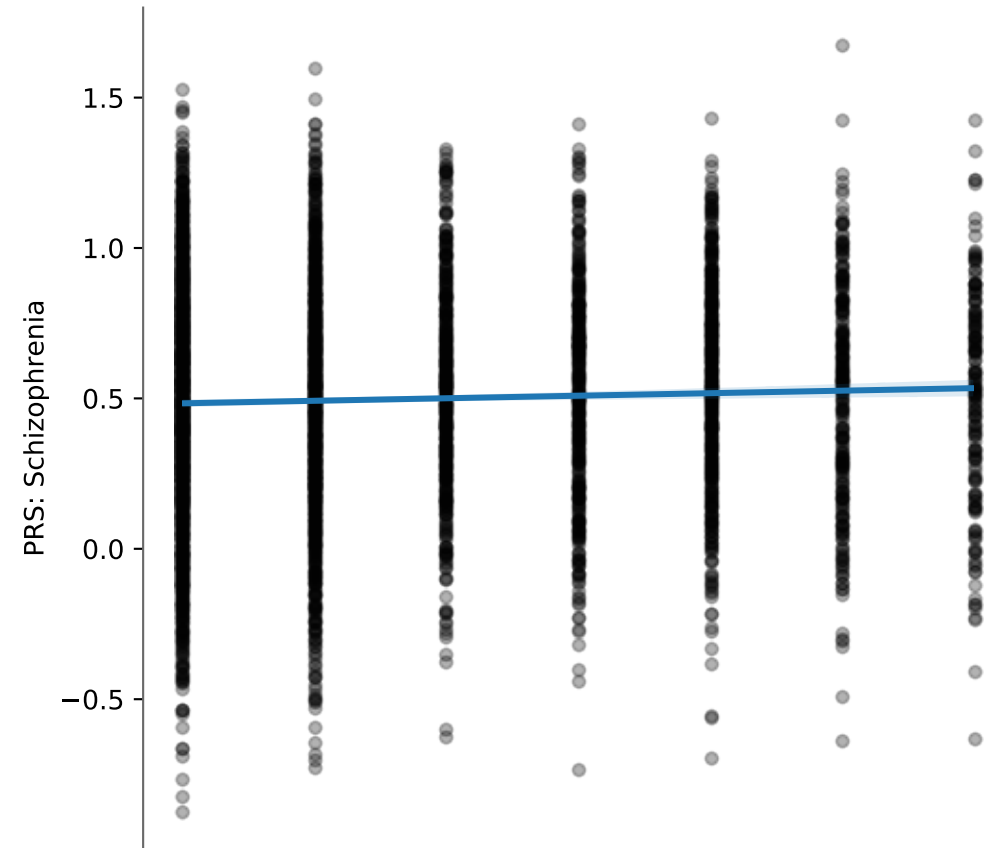

1 (no, that is not true)

2

3

4

5

6

7 (yes, that is true)

Felt tired

Was easily tired  
PGS: Depression  
Meta analysis Z-score: 6.55, p-value: 5.79E-11

Global Screening Array  
Z-score: 5.35, p-value: 8.84E-08

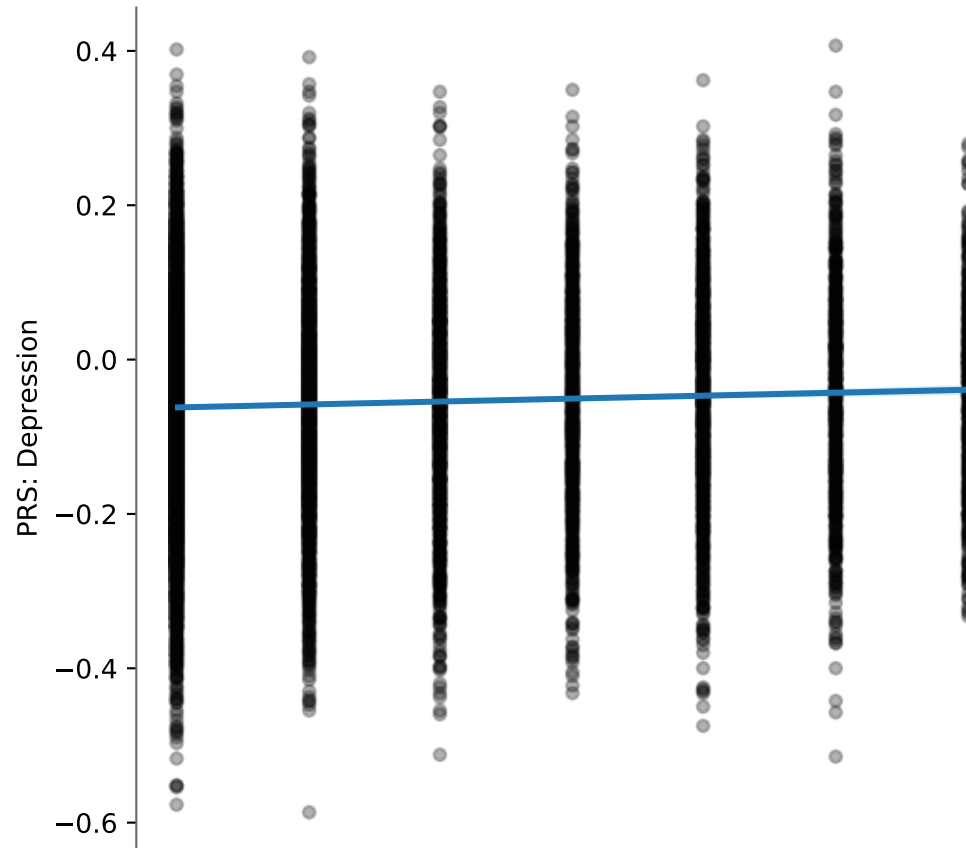

1 (no, that is not true)

2

3

4

5

6

7 (yes, that is true)

Was easily tired

HumanCytoSNP-12  
Z-score: 3.79, p-value: 1.54E-04

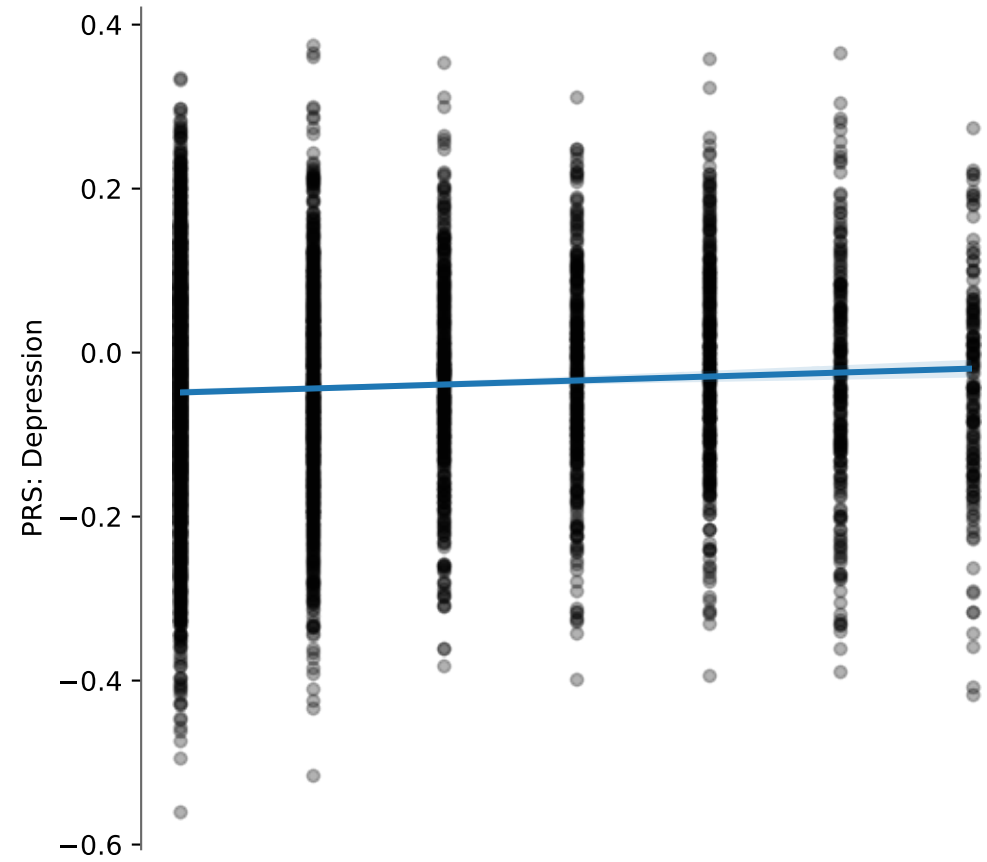

1 (no, that is not true)

2

3

4

5

6

7 (yes, that is true)

Was easily tired

Was easily tired  
PGS: Life satisfaction  
Meta analysis Z-score: -10.05, p-value: 9.18E-24

Global Screening Array  
Z-score: -8.56, p-value: 1.13E-17

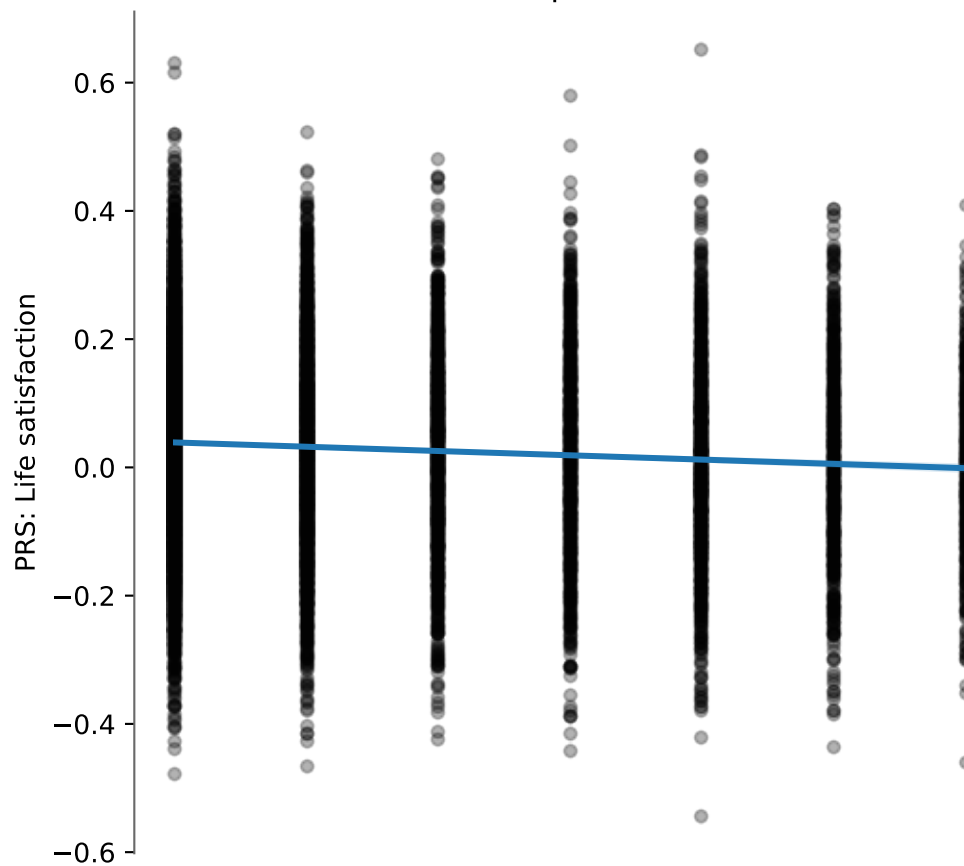

1 (no, that is not true)

2

3

4

5

6

7 (yes, that is true)

Was easily tired

HumanCytoSNP-12  
Z-score: -5.24, p-value: 1.62E-07

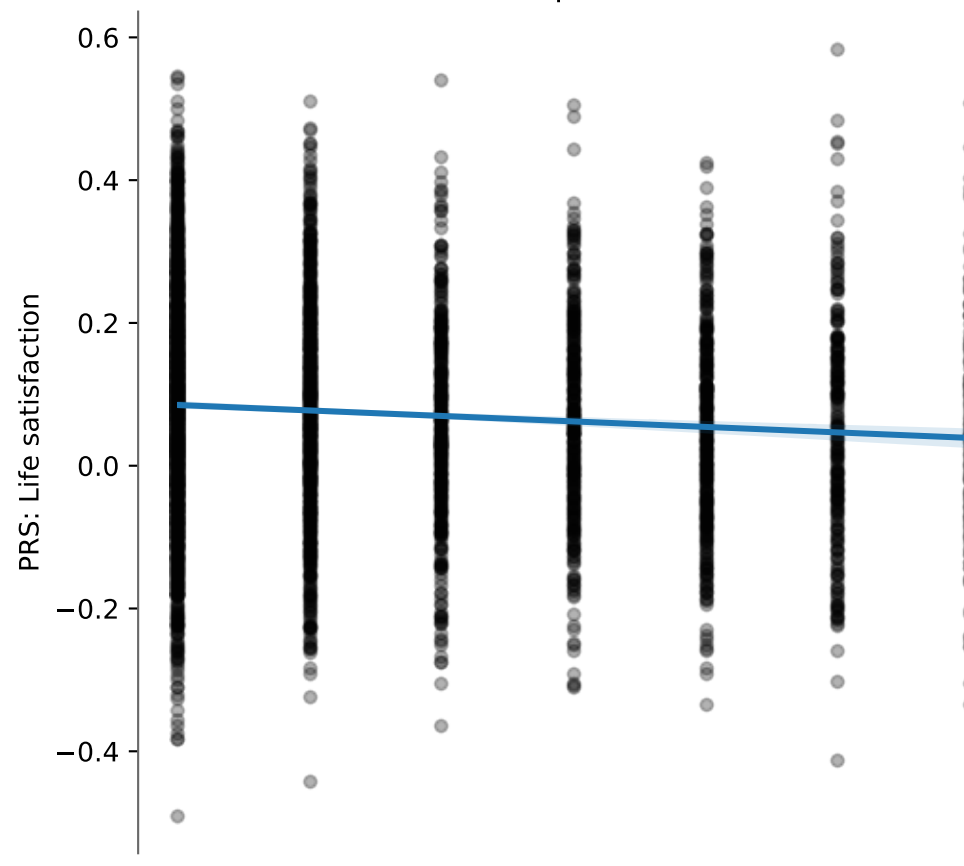

1 (no, that is not true)

2

3

4

5

6

7 (yes, that is true)

Was easily tired

Was easily tired  
PGS: Neuroticism  
Meta analysis Z-score: 8.19, p-value: 2.65E-16

Global Screening Array  
Z-score: 7.17, p-value: 7.38E-13

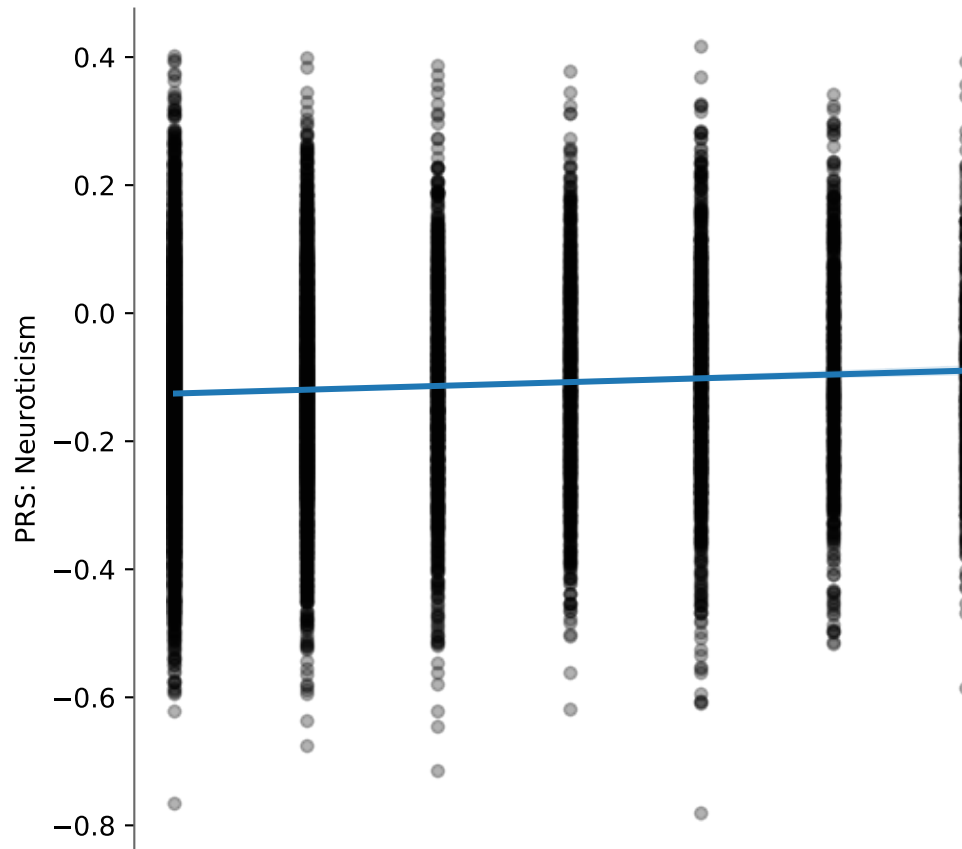

1 (no, that is not true)

Was easily tired

7 (yes, that is true)

HumanCytoSNP-12  
Z-score: 3.96, p-value: 7.38E-05

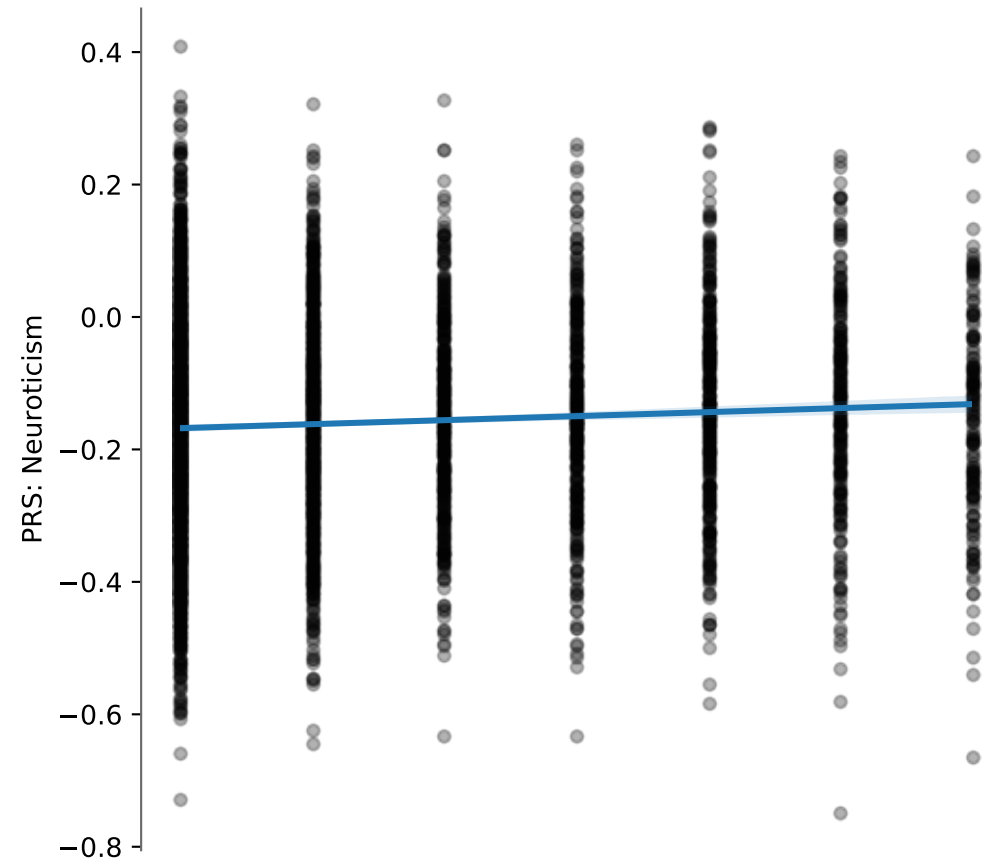

1 (no, that is not true)

Was easily tired

7 (yes, that is true)

Was easily tired  
PGS: Schizophrenia  
Meta analysis Z-score: 6.55, p-value: 5.91E-11

Global Screening Array  
Z-score: 5.57, p-value: 2.52E-08

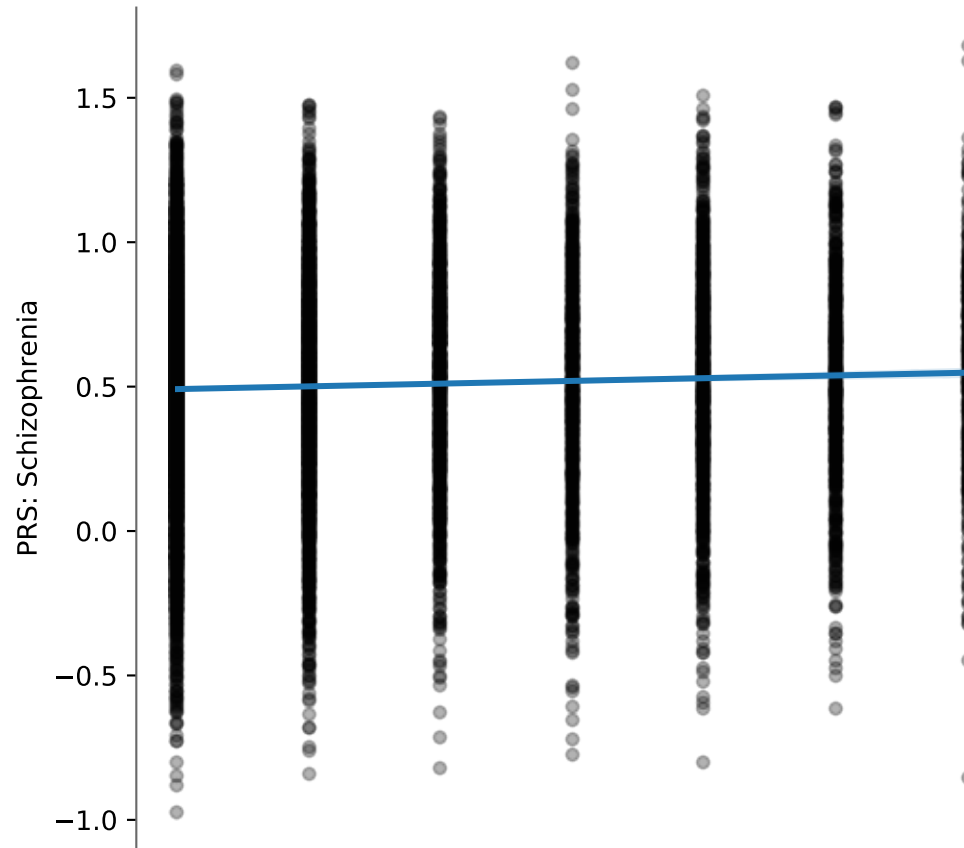

1 (no, that is not true)

2

3

4

5

6

7 (yes, that is true)

Was easily tired

HumanCytoSNP-12  
Z-score: 3.43, p-value: 6.01E-04

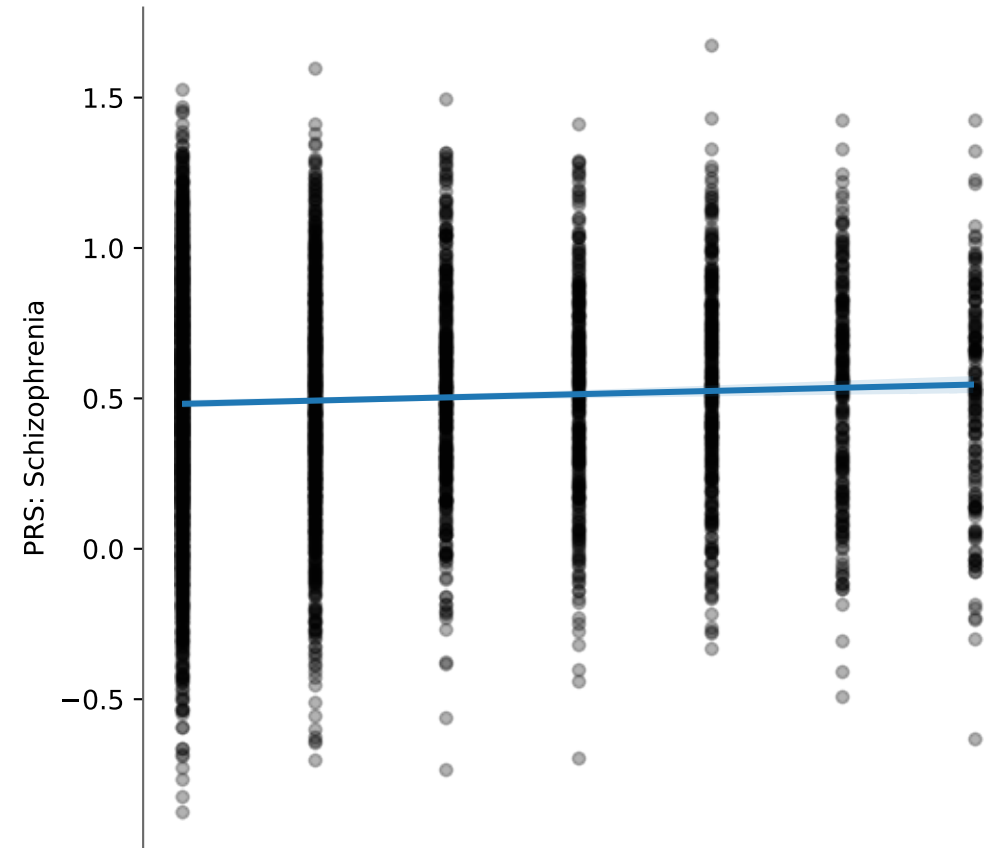

1 (no, that is not true)

2

3

4

5

6

7 (yes, that is true)

Was easily tired



Not kissing anyone on the cheek  
PGS: Educational attainment  
Meta analysis Z-score: 4.81, p-value: 1.52E-06

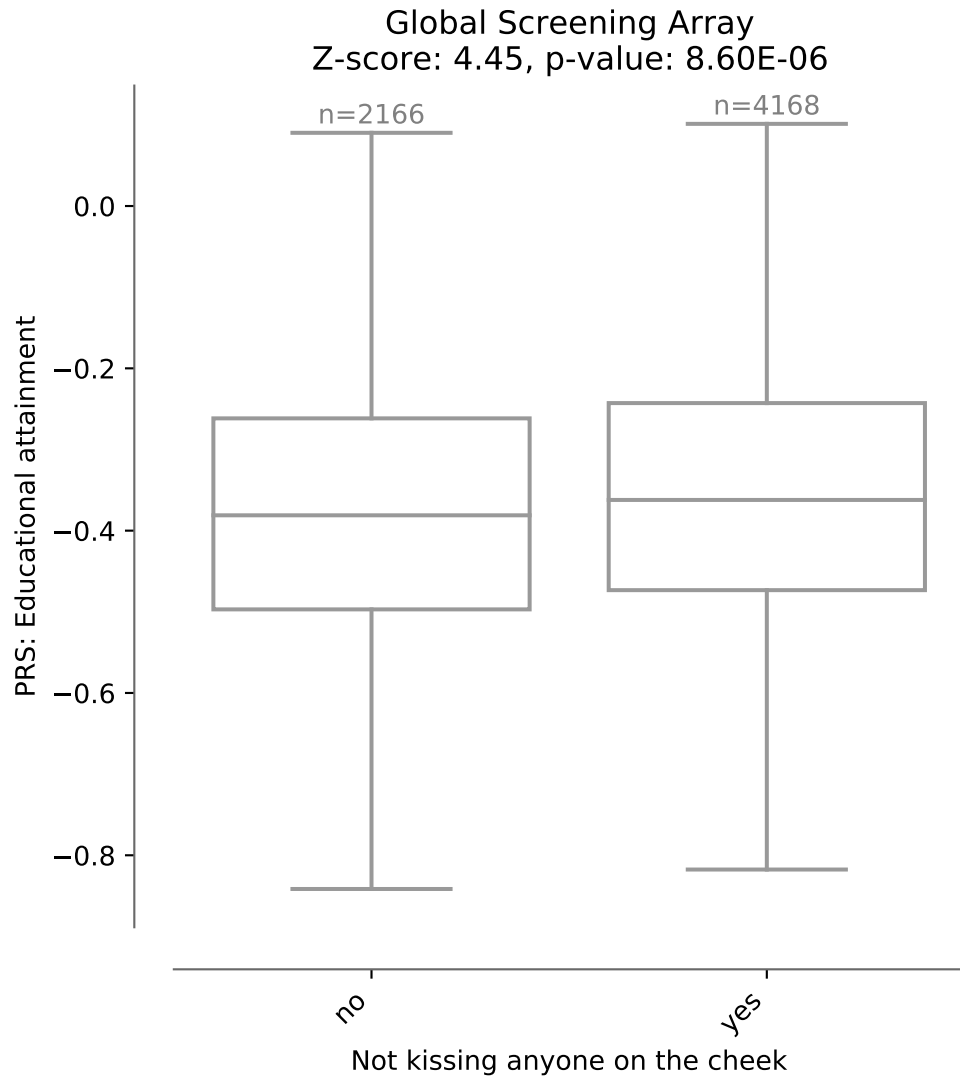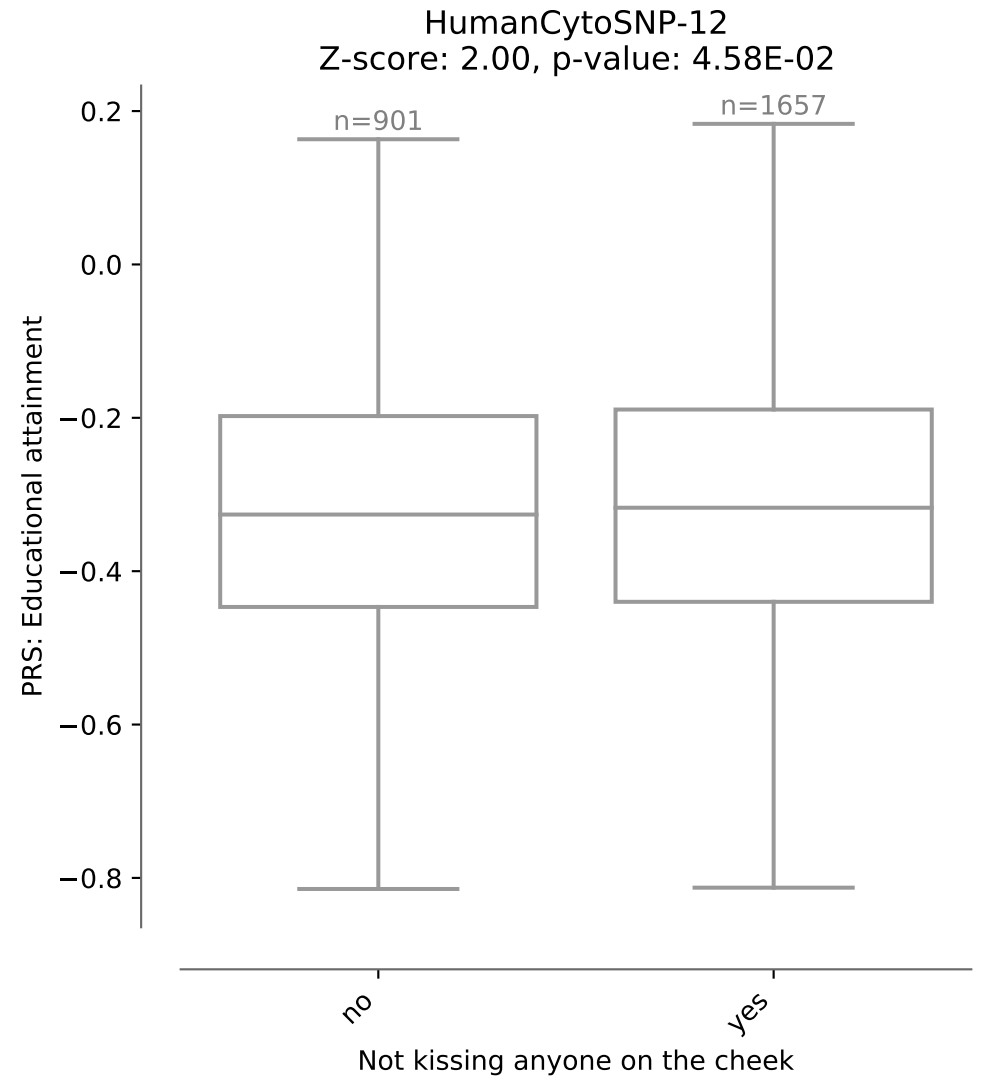

Being bothered about getting infected with COVID-19  
PGS: Educational attainment  
Meta analysis Z-score: -7.90, p-value: 2.86E-15

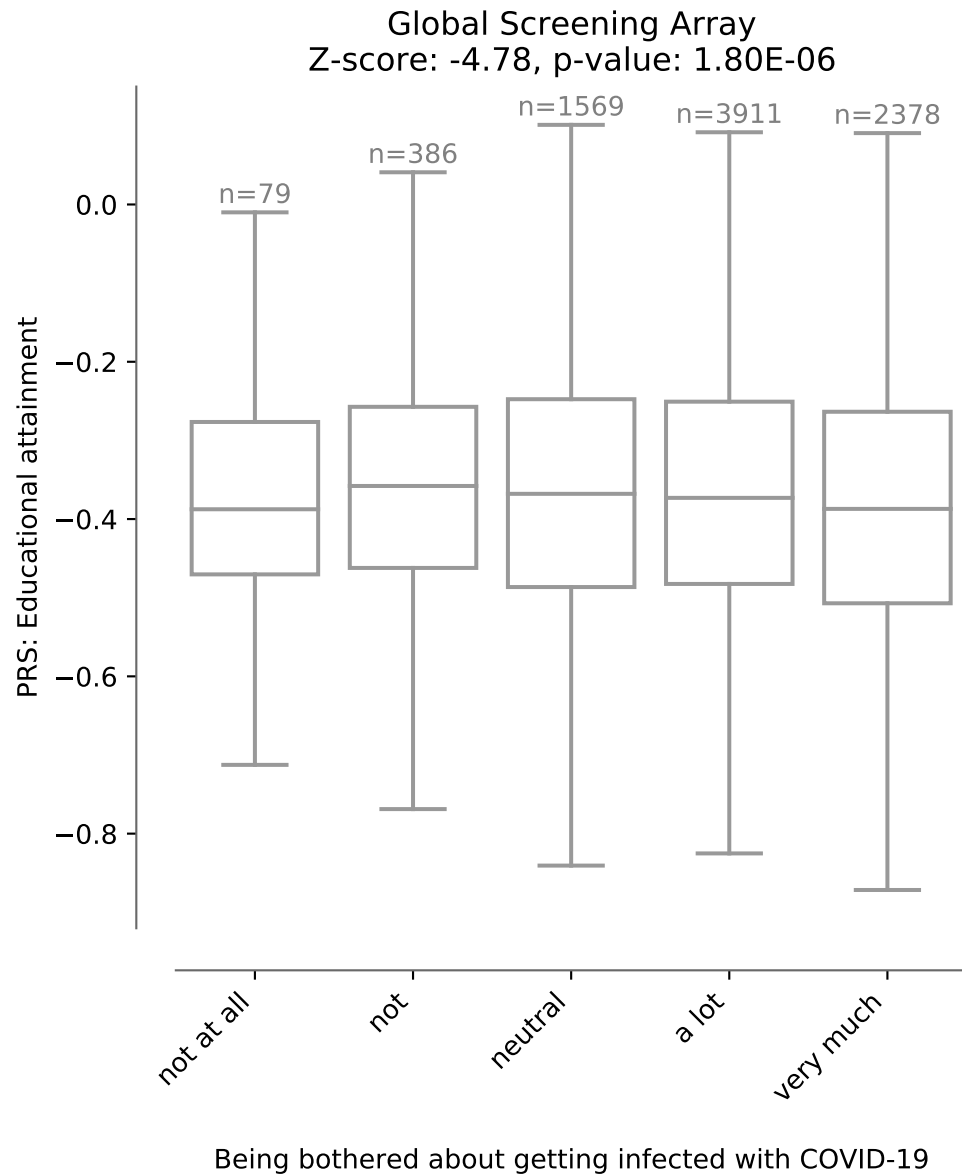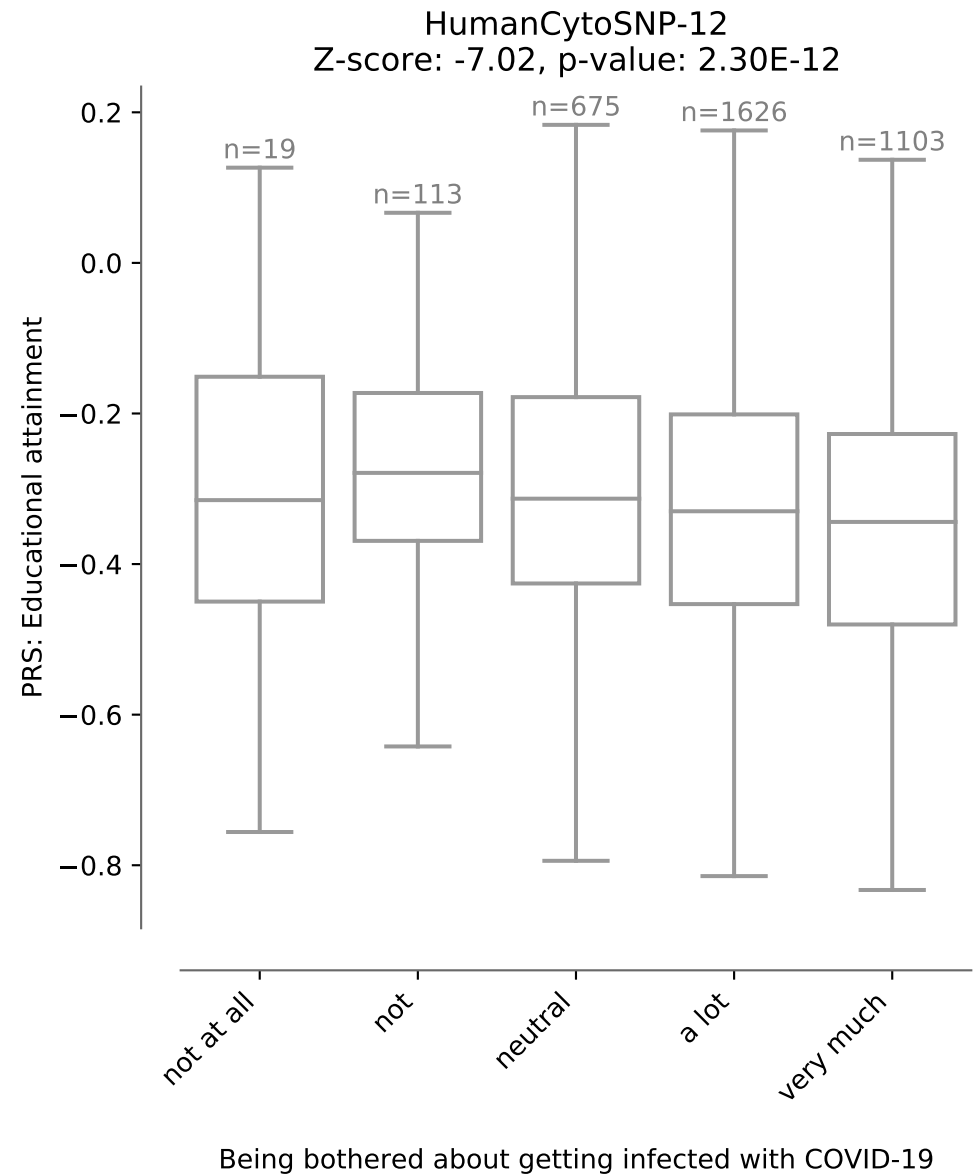

Minutes of moderate-intensity or intensity physical activity  
PGS: Accelerometer-based physical activity  
Meta analysis Z-score: 5.45, p-value: 5.00E-08

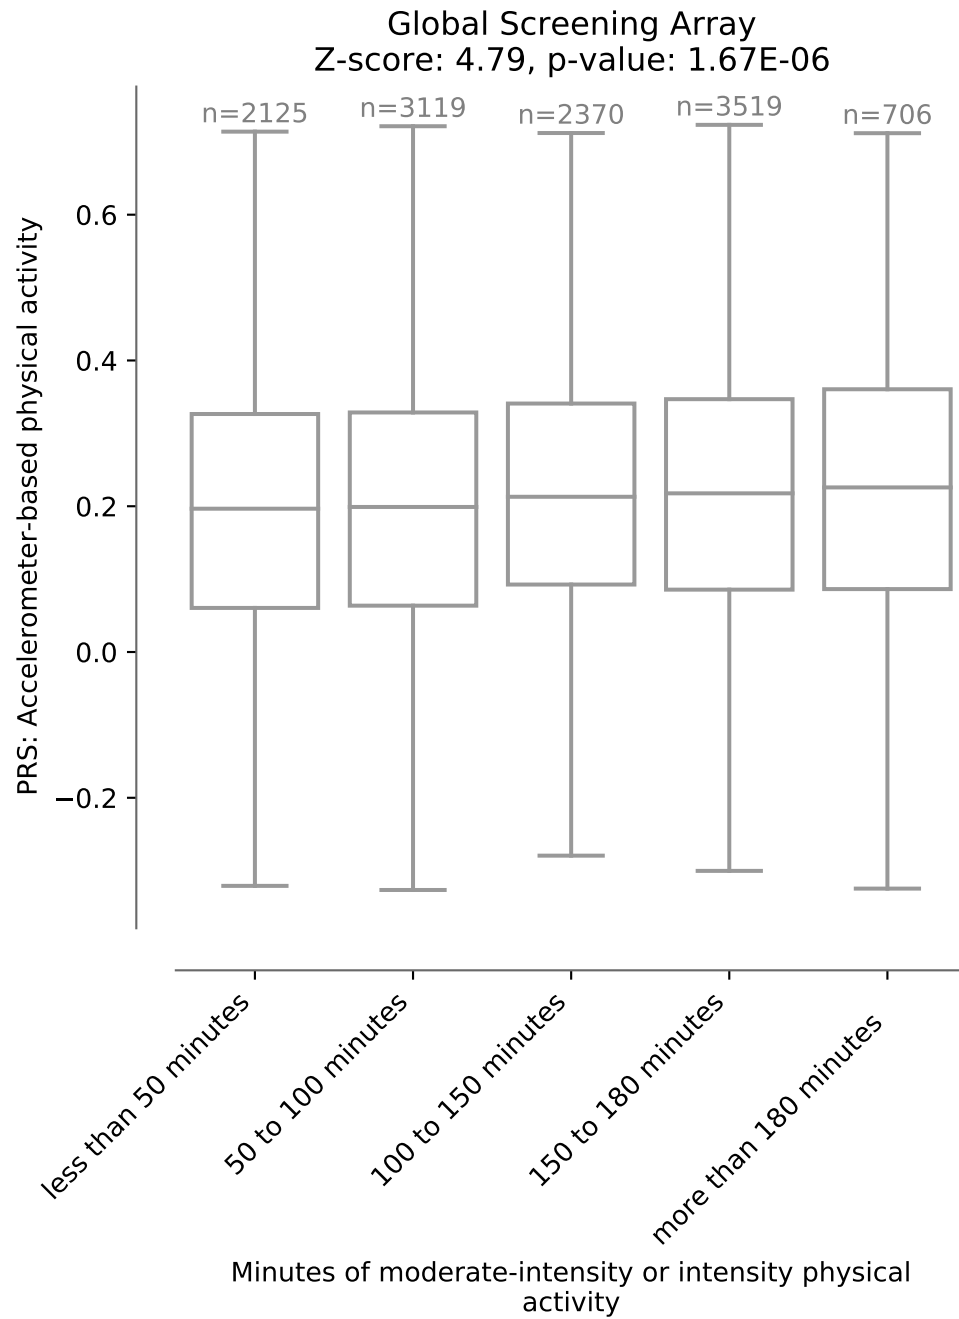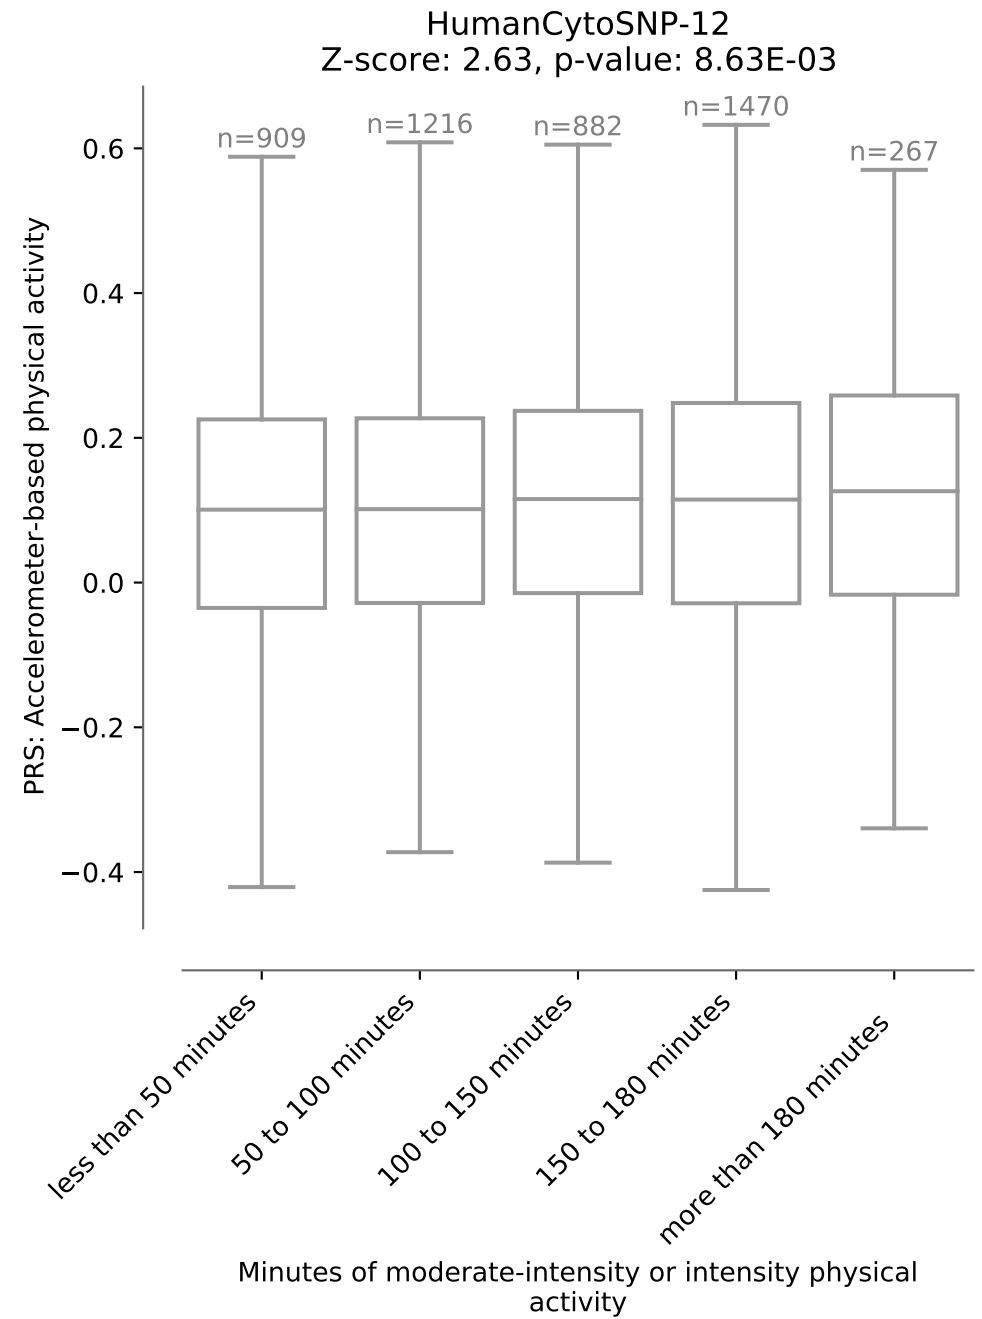

Minutes of moderate-intensity or intensity physical activity

PGS: BMI

Meta analysis Z-score: -4.91, p-value: 9.08E-07

Global Screening Array  
Z-score: -3.80, p-value: 1.44E-04

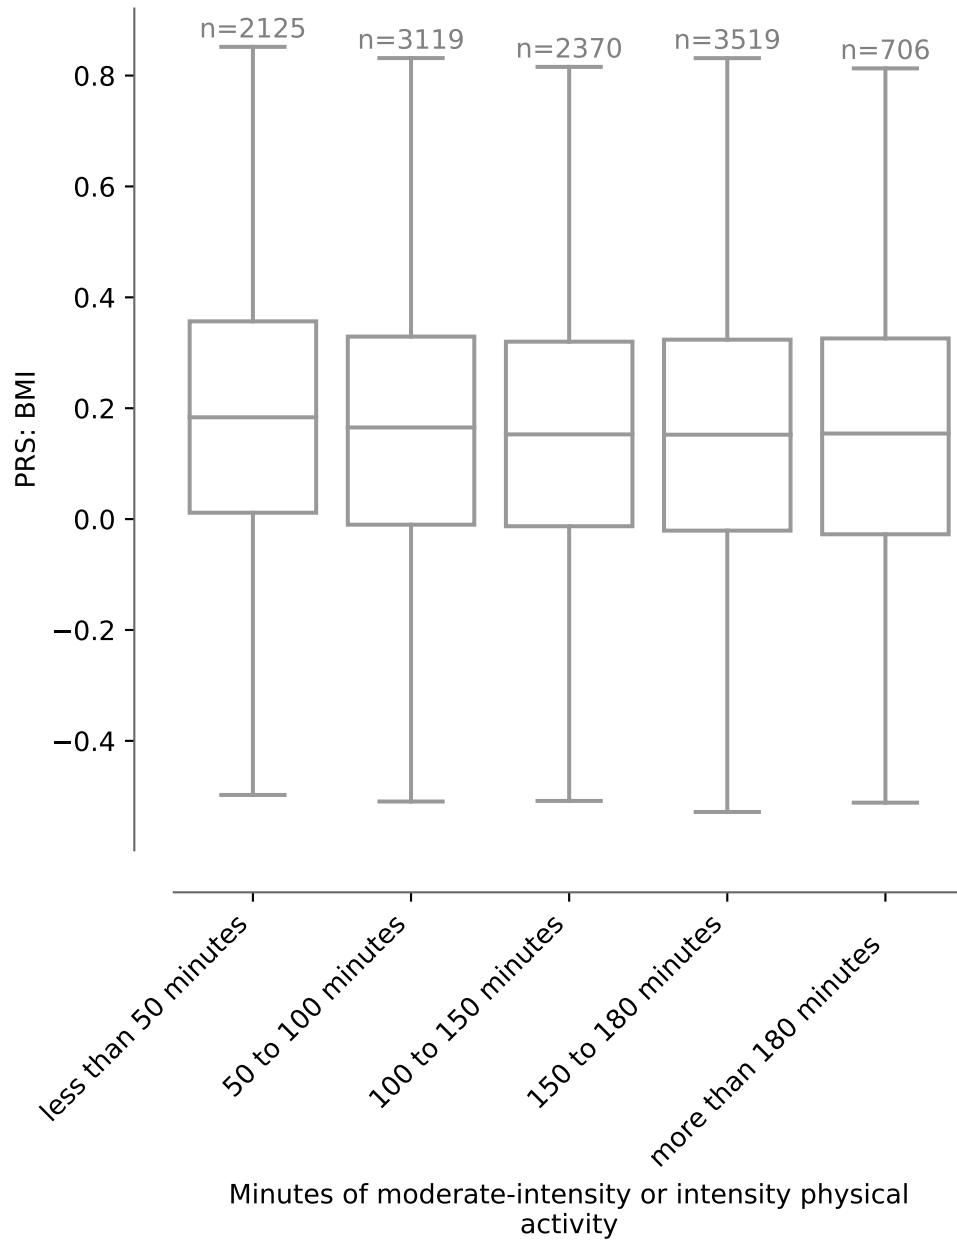

HumanCytoSNP-12  
Z-score: -3.19, p-value: 1.41E-03

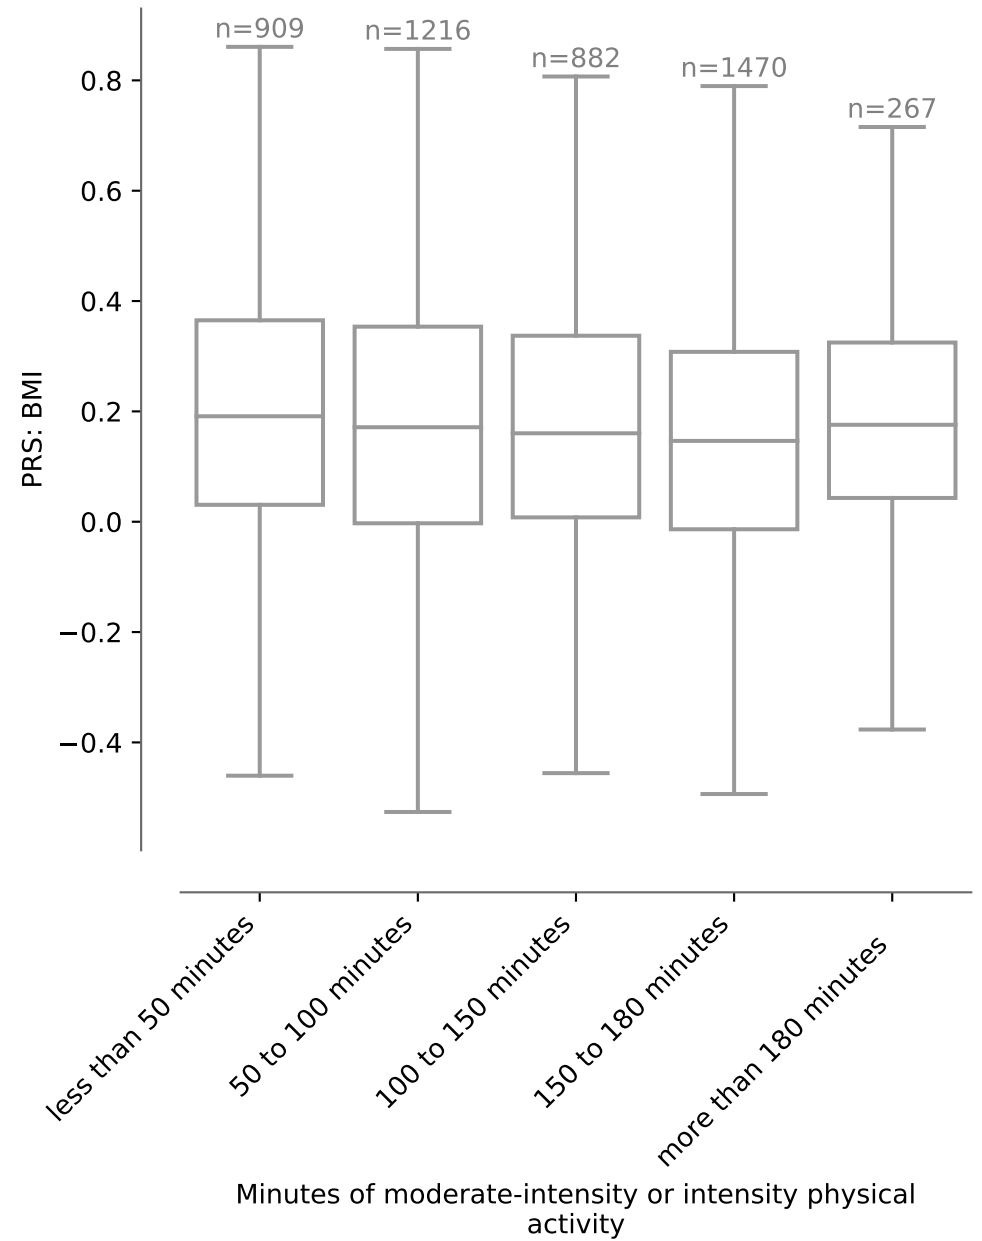

Minutes of moderate-intensity or intensity physical activity  
PGS: Educational attainment  
Meta analysis Z-score: 7.01, p-value: 2.35E-12

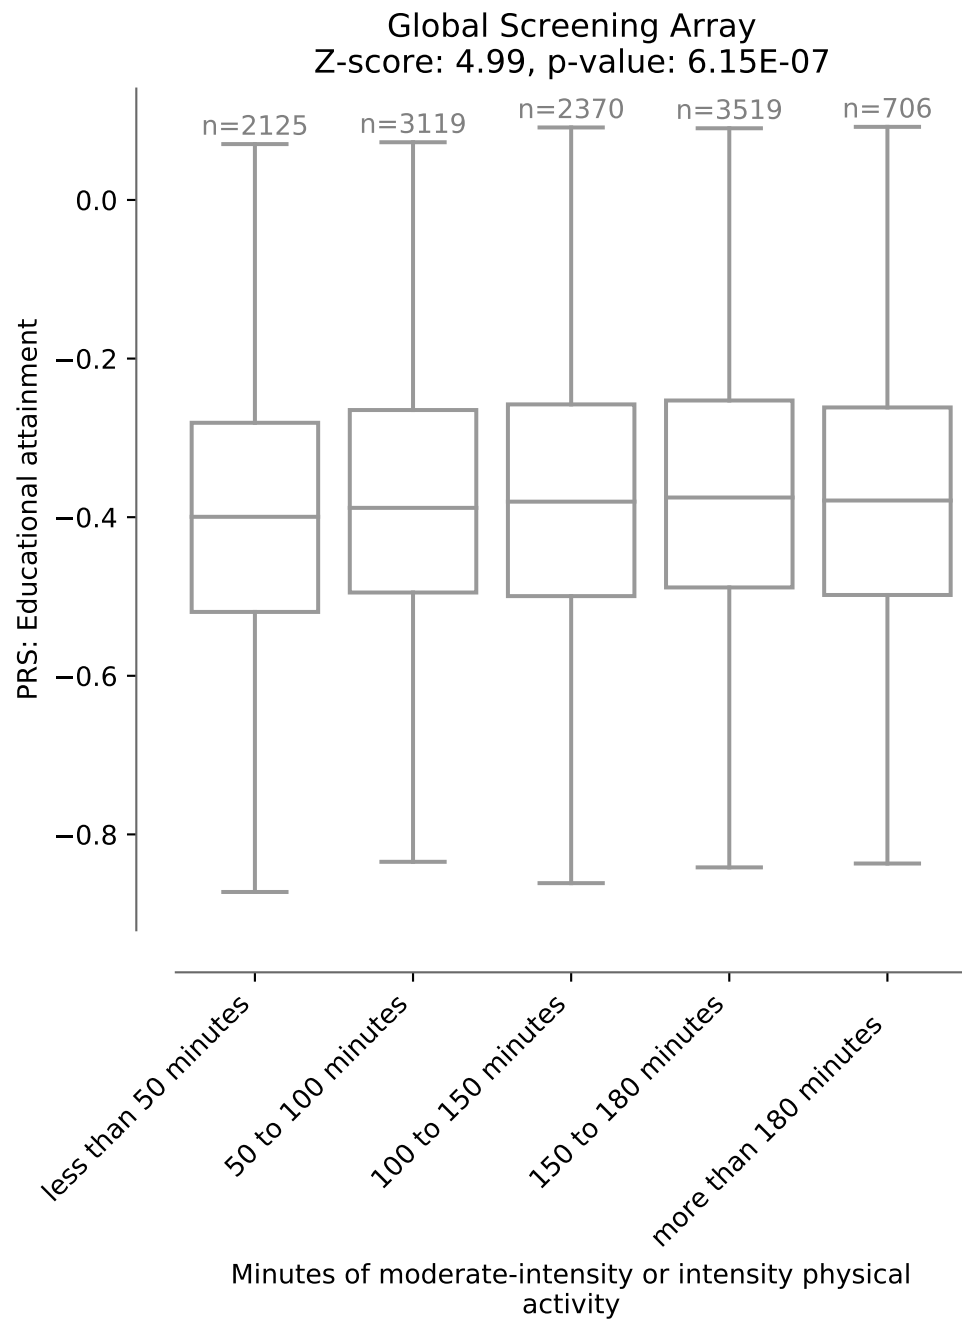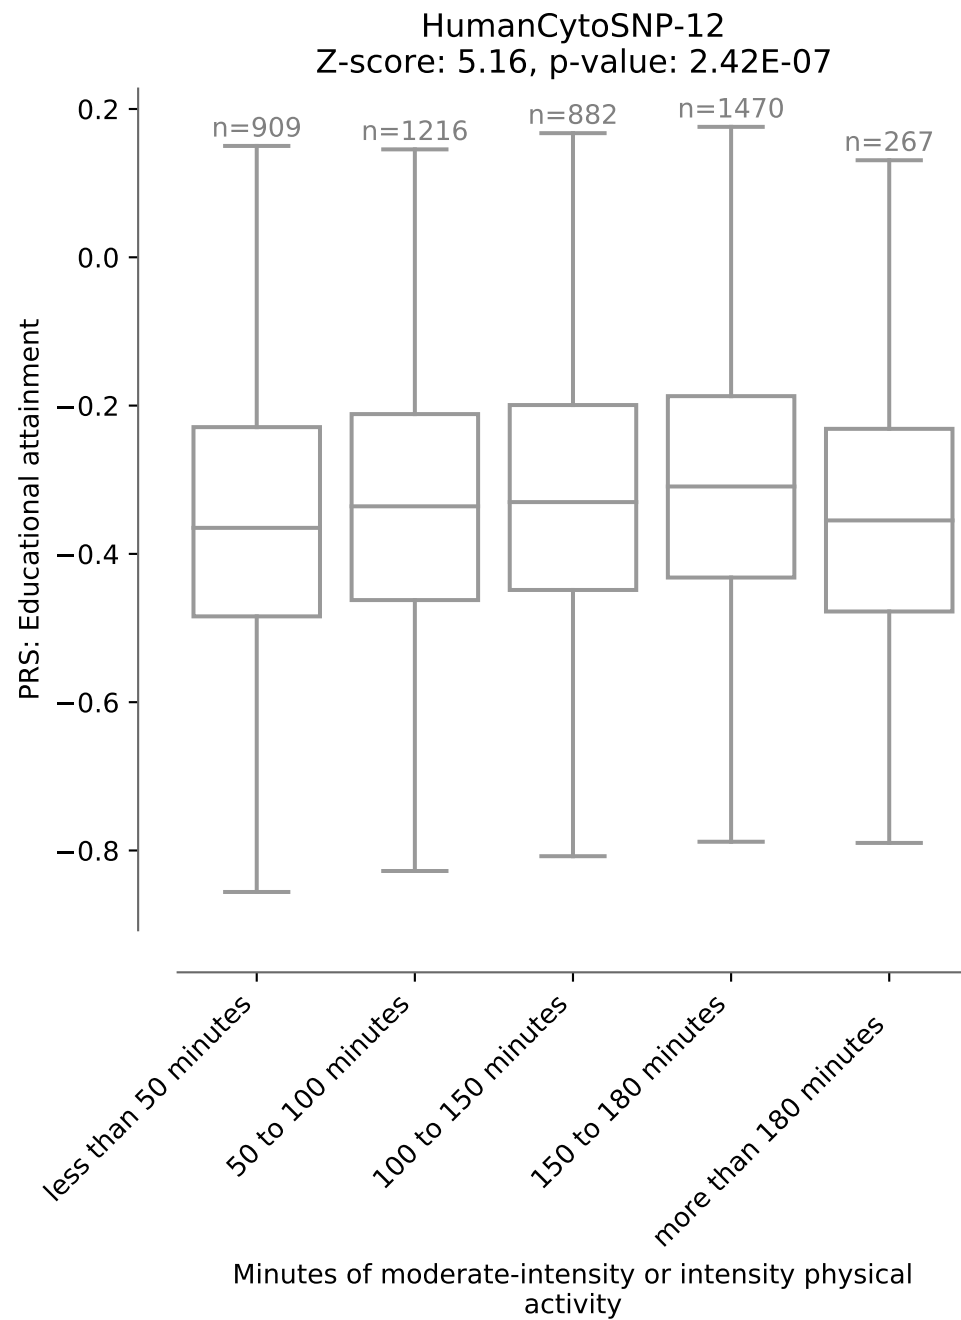

Average time spend sitting per weekend day  
PGS: General risk tolerance  
Meta analysis Z-score: -4.55, p-value: 5.40E-06

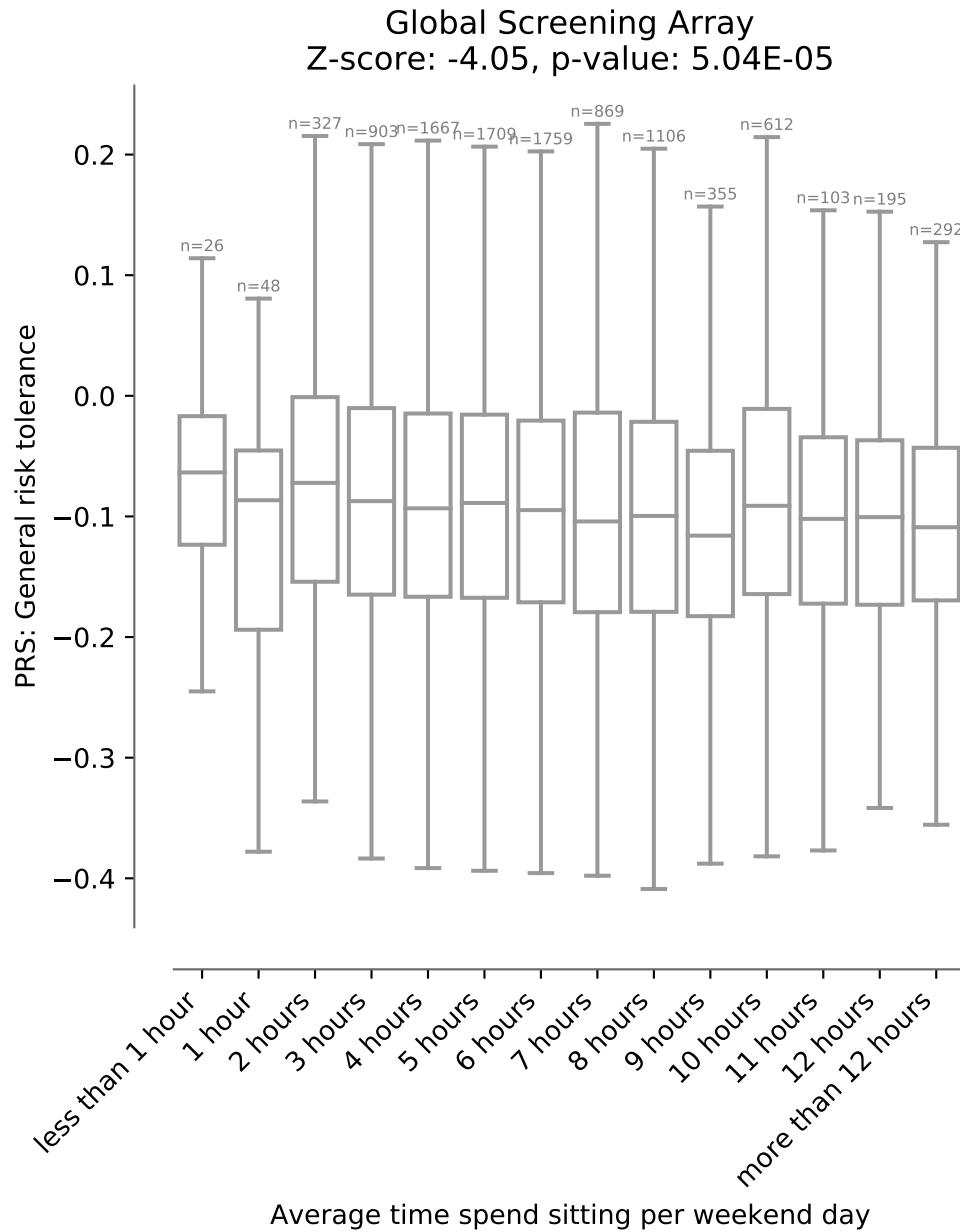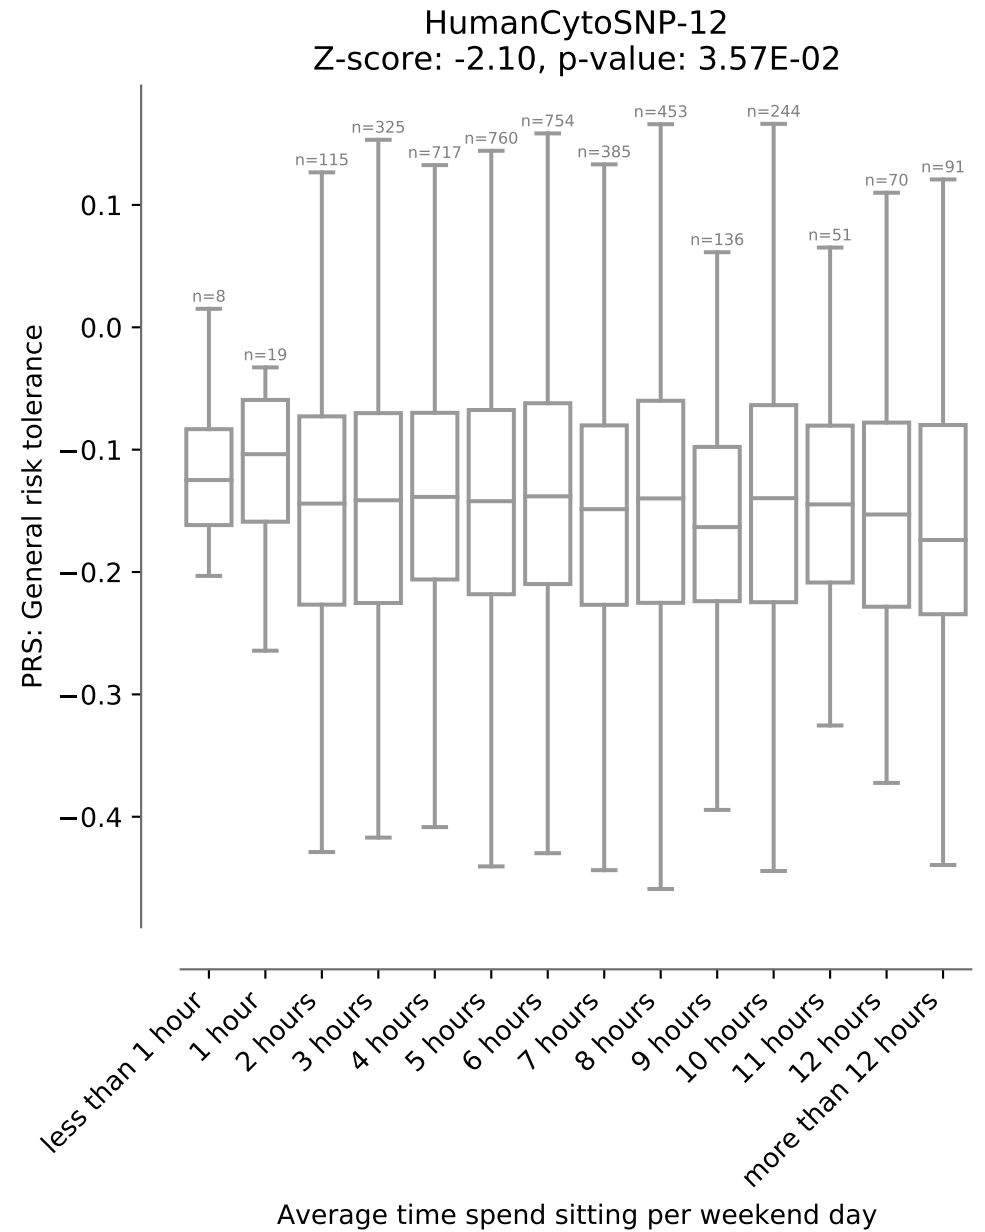

Average time spend sitting per weekend day  
 PGS: Moderate to vigorous physical activity (MVPA)  
 Meta analysis Z-score: -4.57, p-value: 4.91E-06

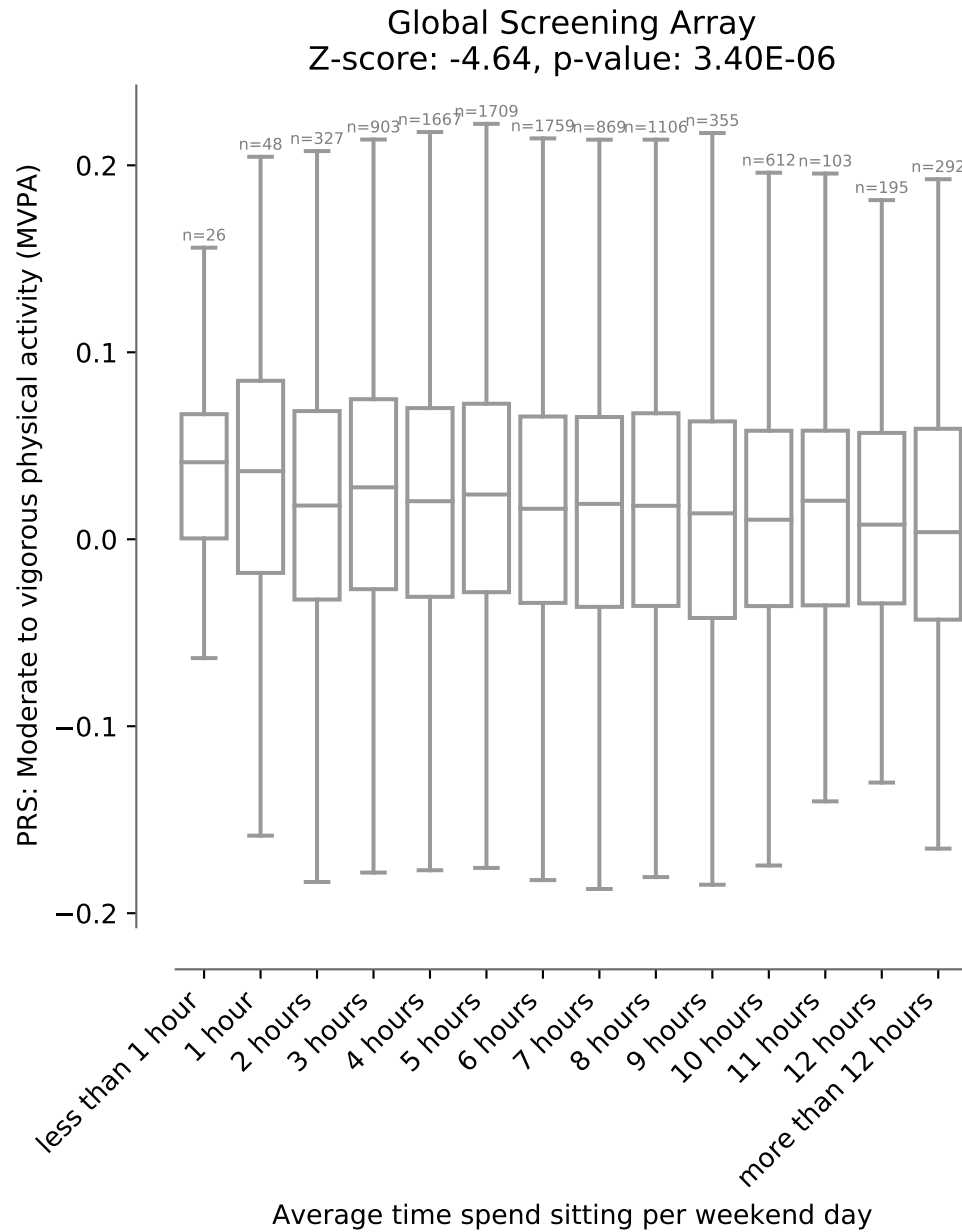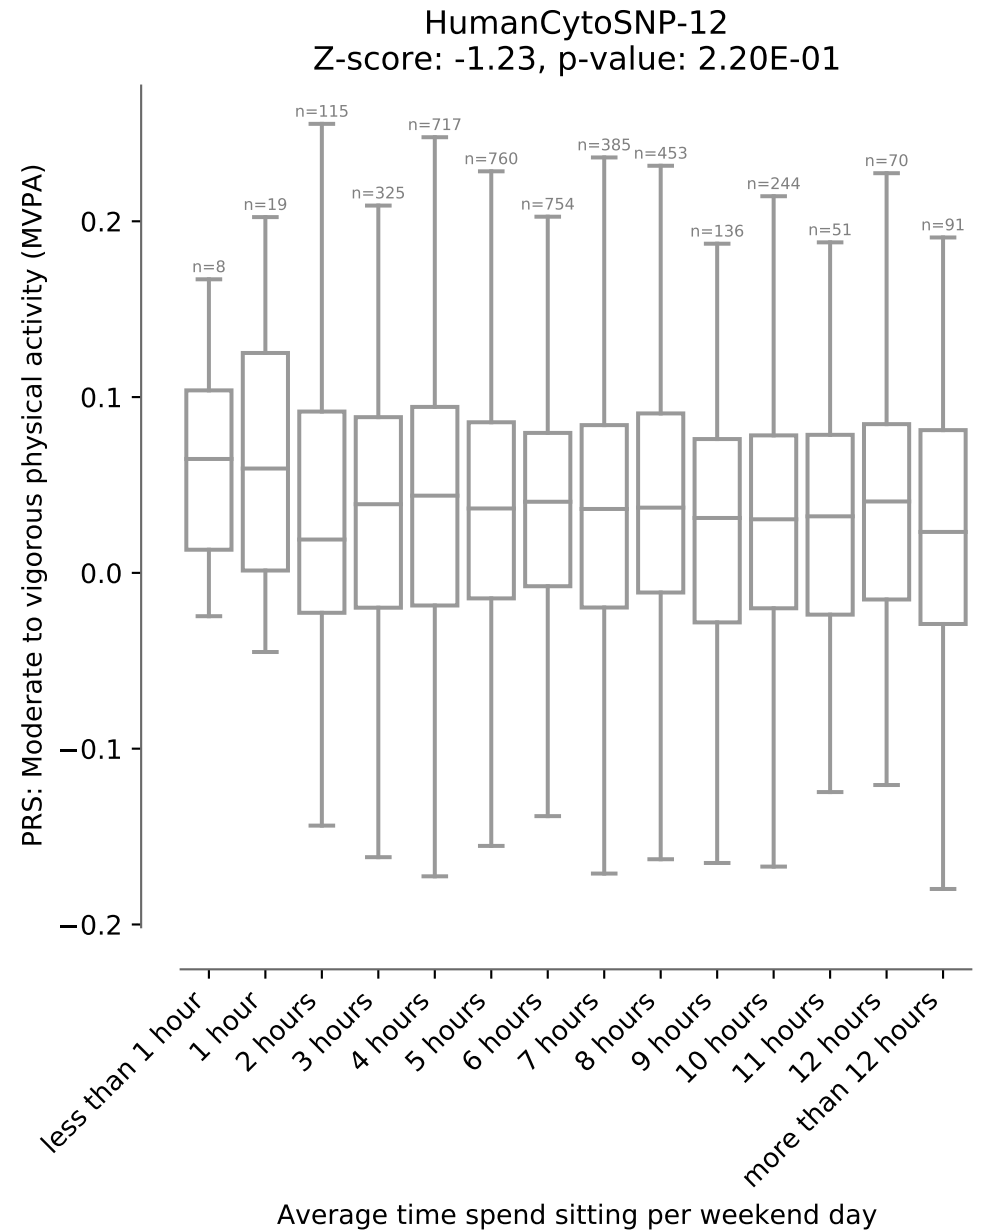

Average time spend sitting per working day  
PGS: Educational attainment  
Meta analysis Z-score: 6.01, p-value: 1.90E-09

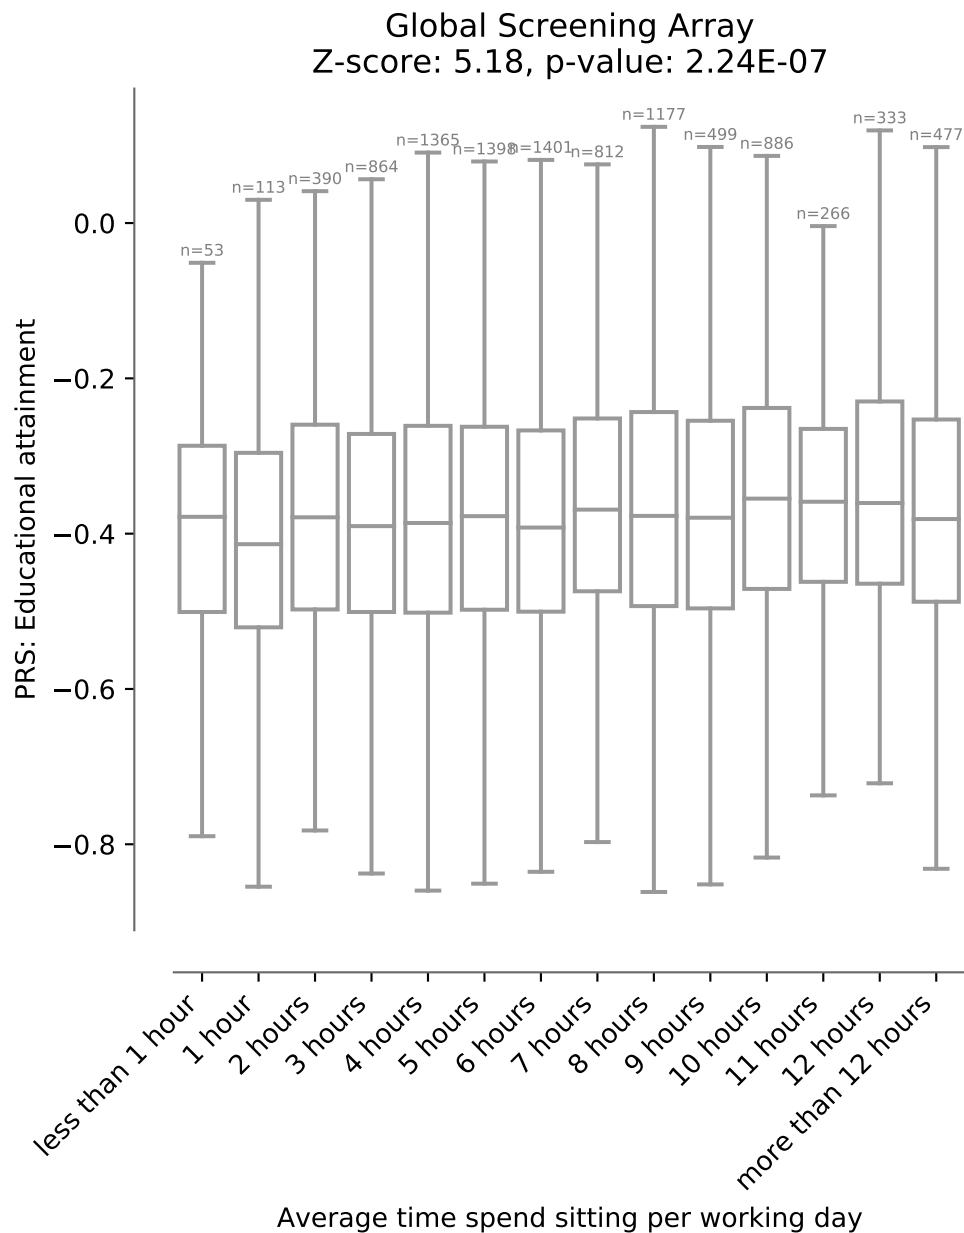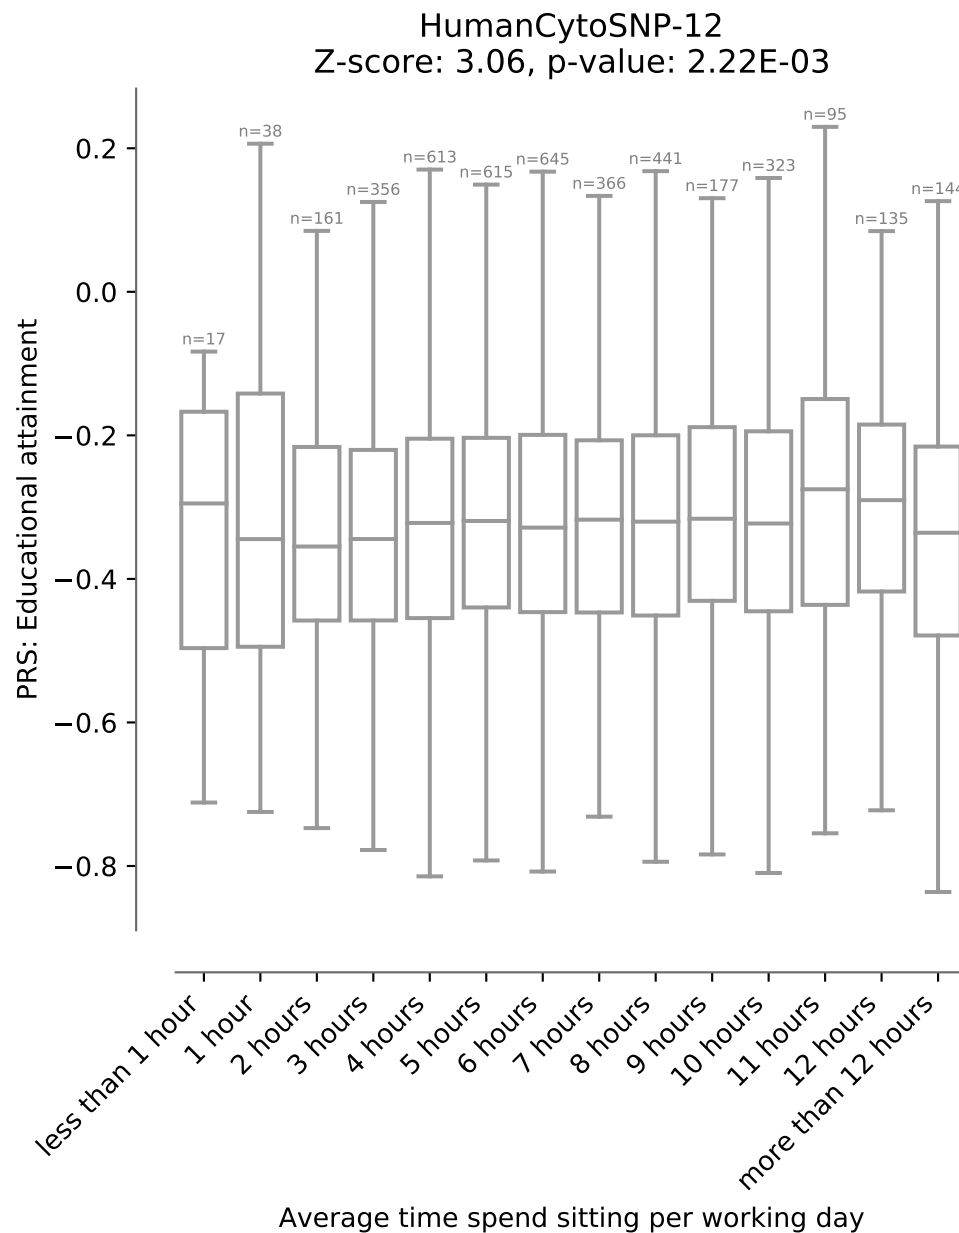



Average time spend sitting per working day  
PGS: Moderate to vigorous physical activity (MVPA)  
Meta analysis Z-score: -4.92, p-value: 8.80E-07

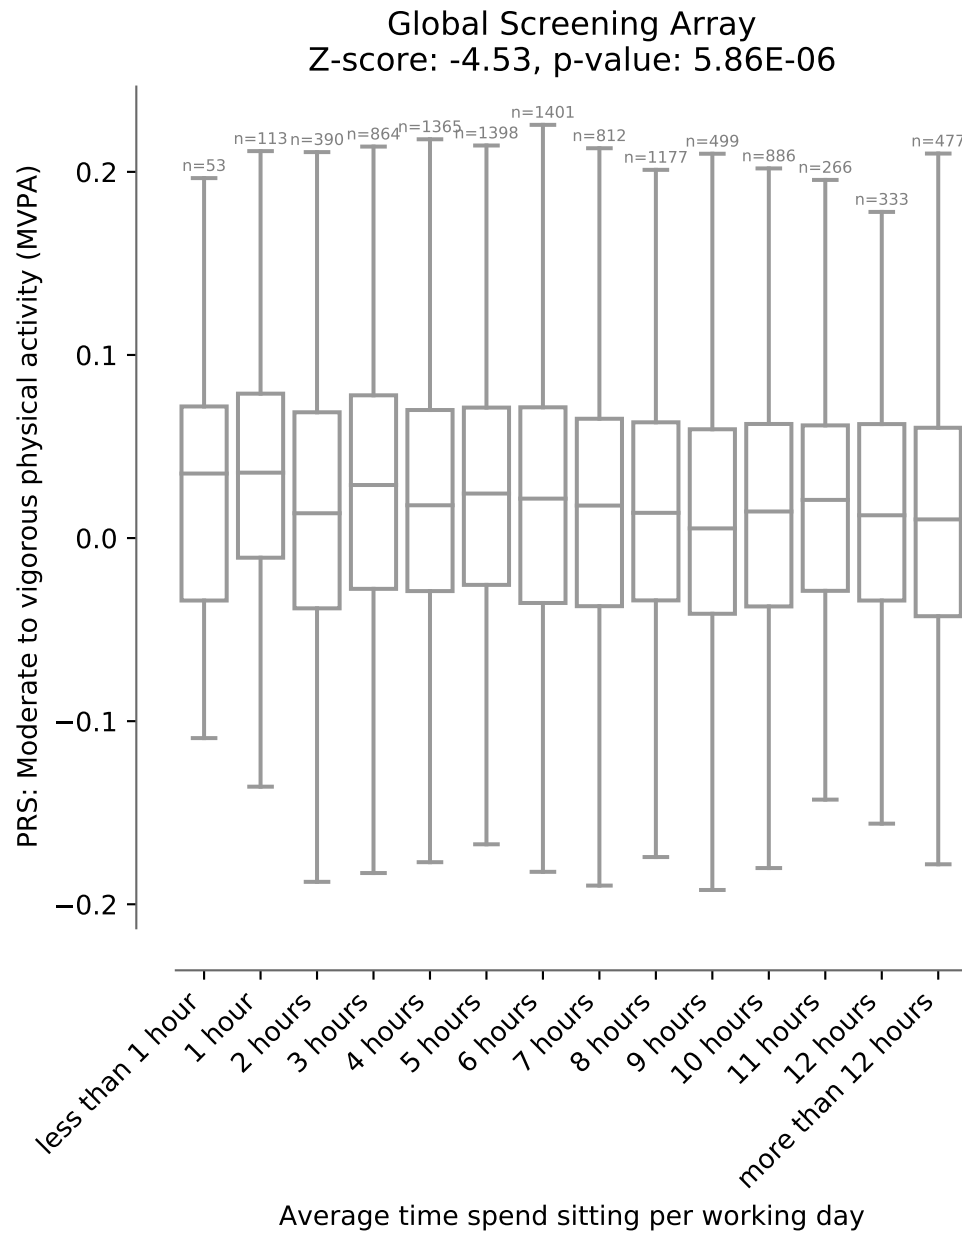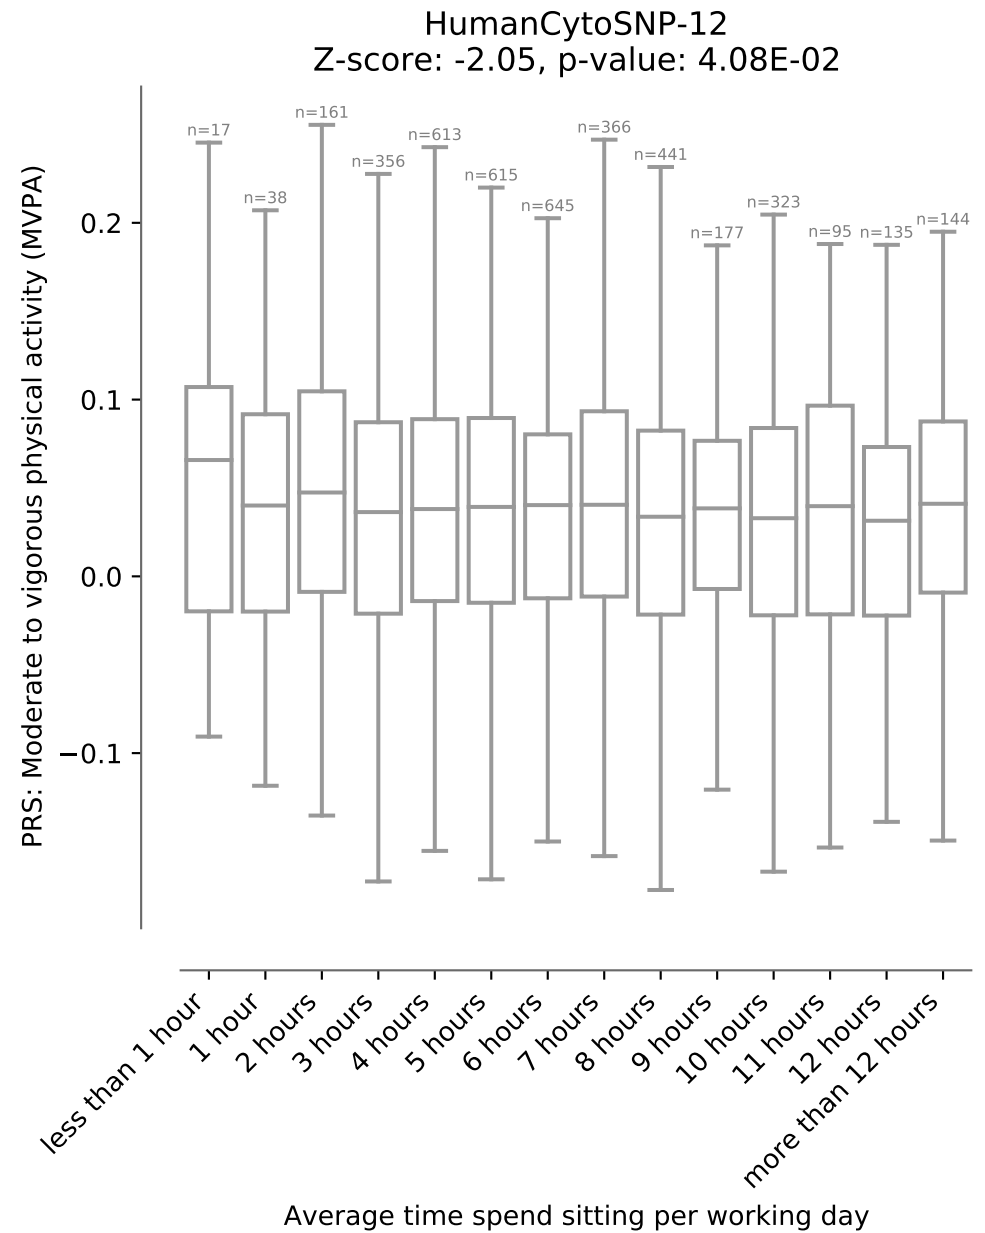

Thinking that a corona vaccine will have serious side effects

PGS: Educational attainment

Meta analysis Z-score: -8.58, p-value: 9.24E-18

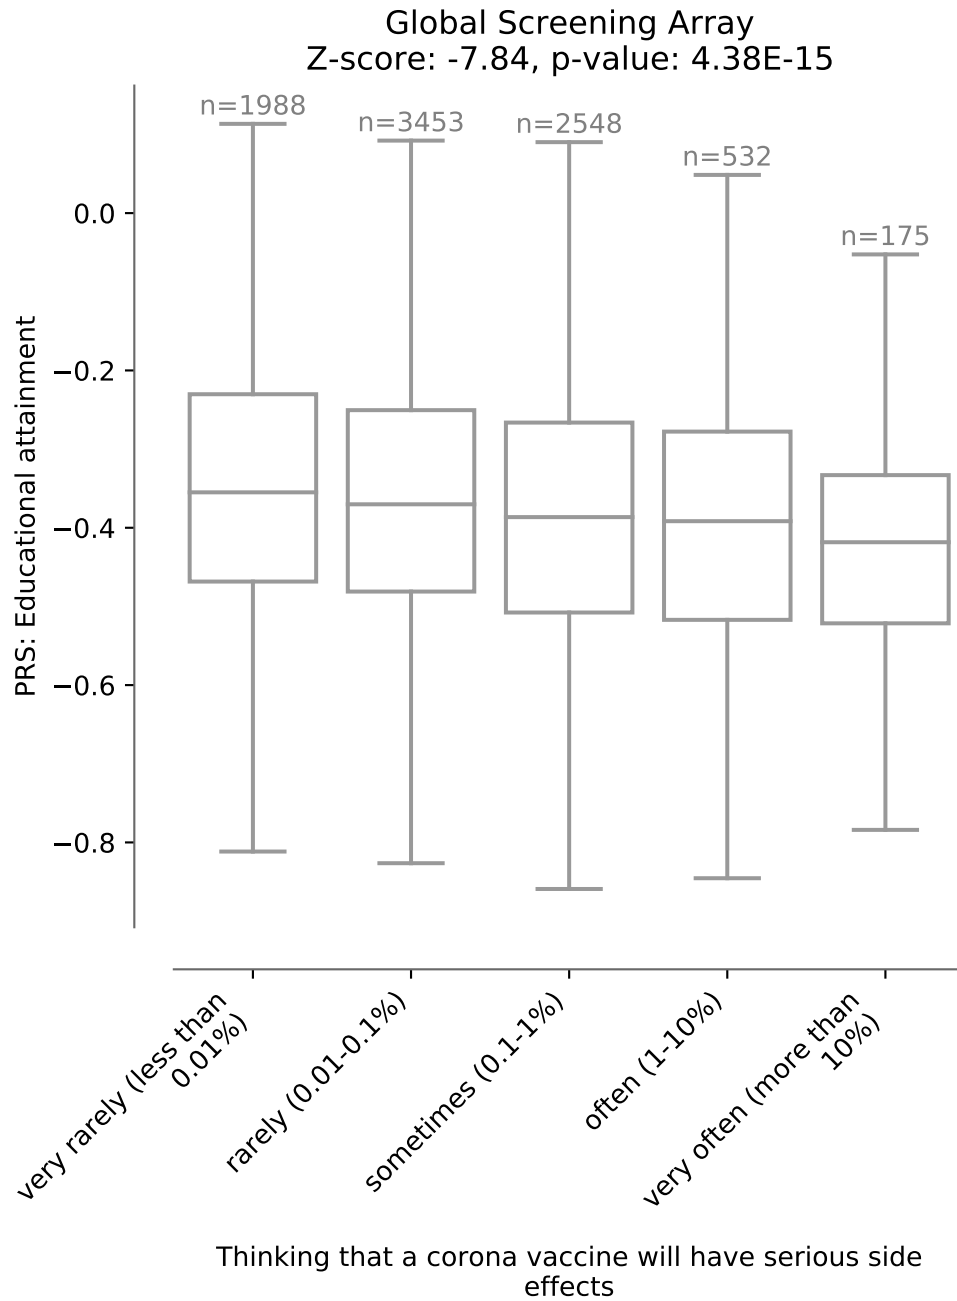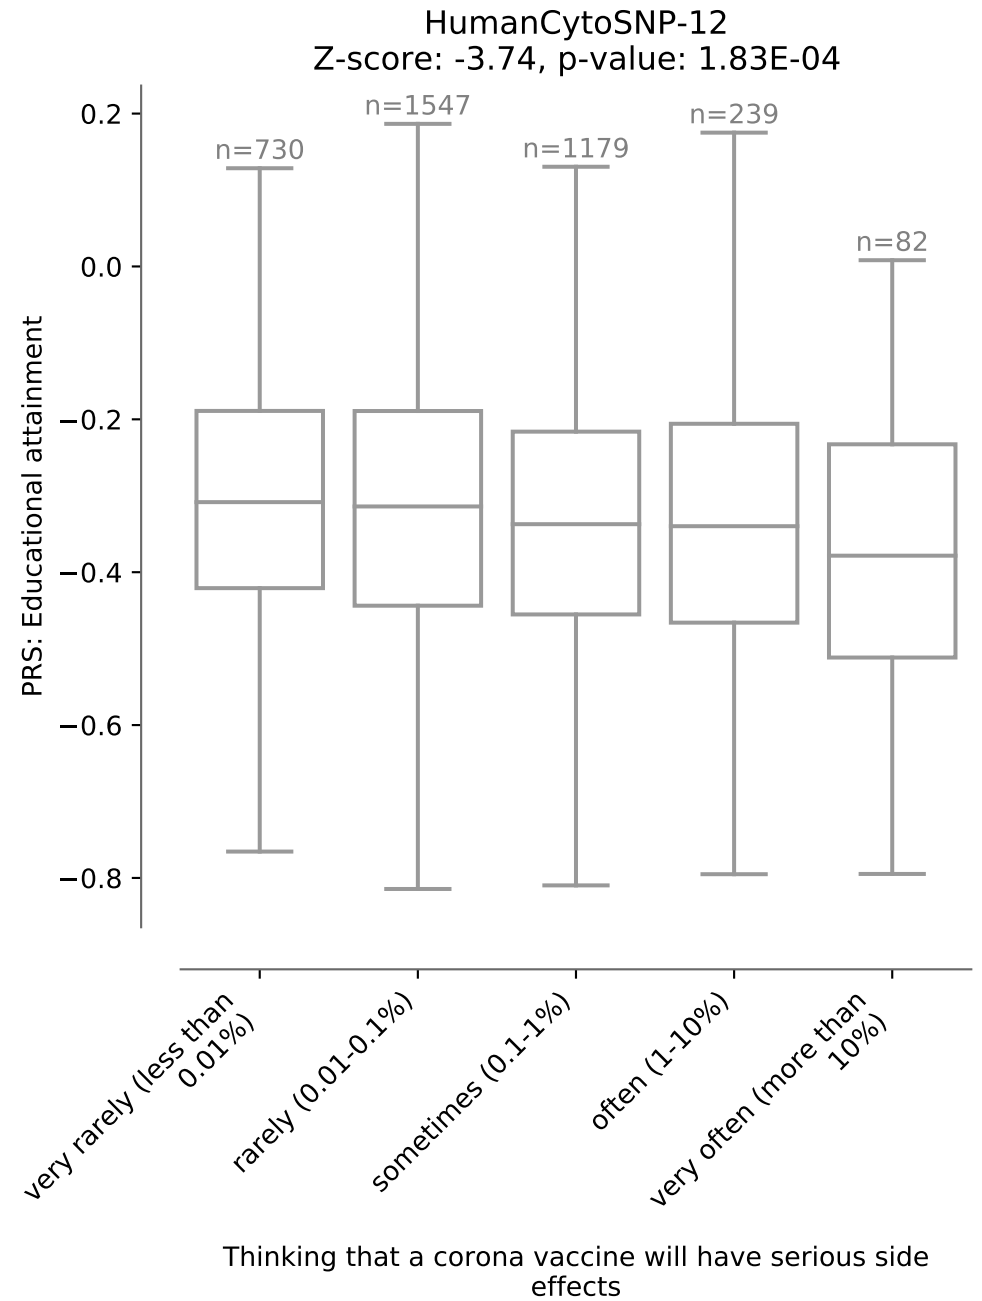

Thinking that vaccines in general have serious side effects  
PGS: Educational attainment  
Meta analysis Z-score: -10.66, p-value: 1.51E-26

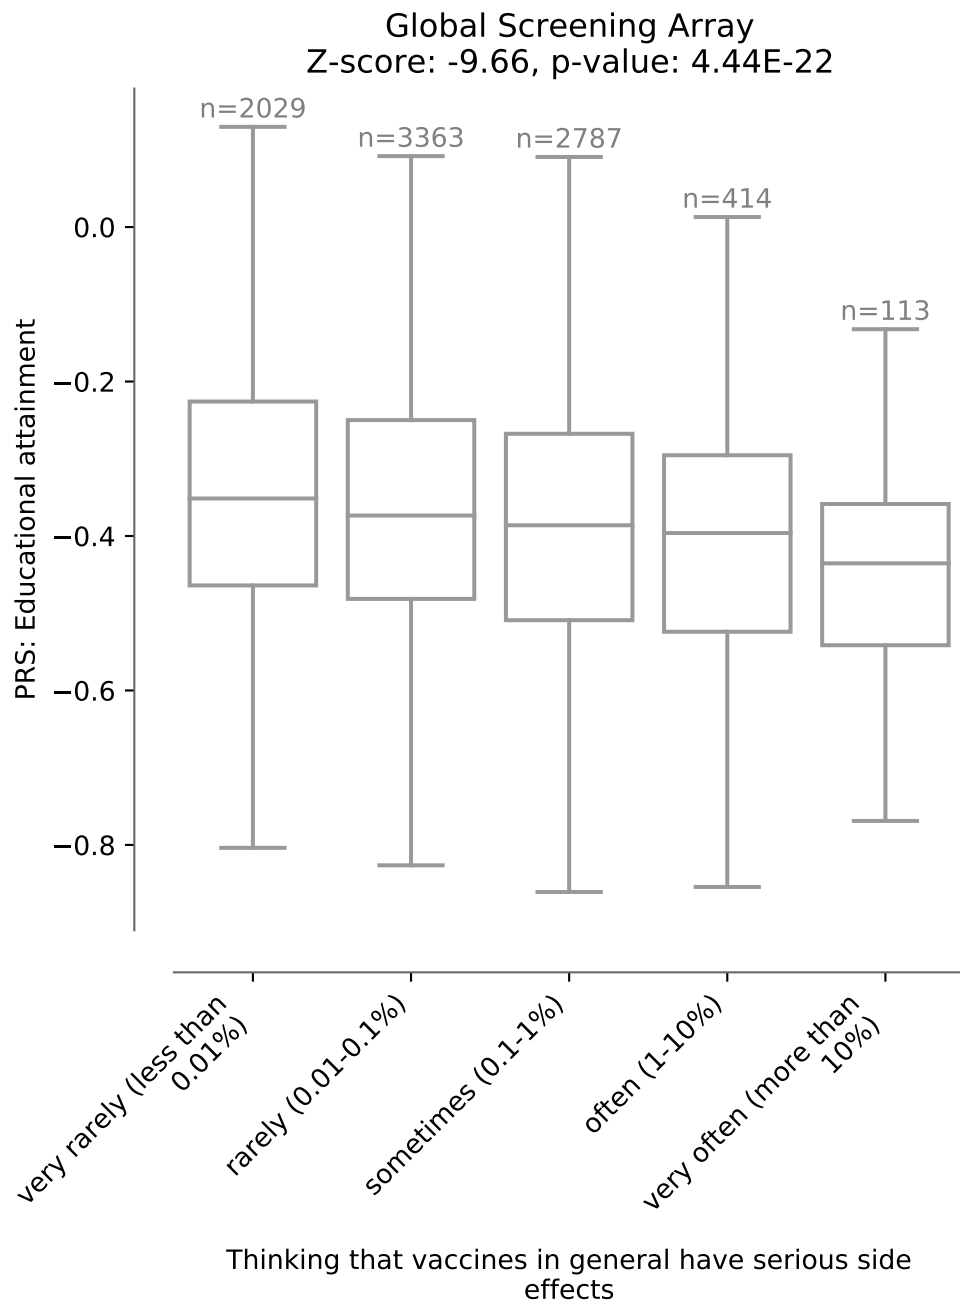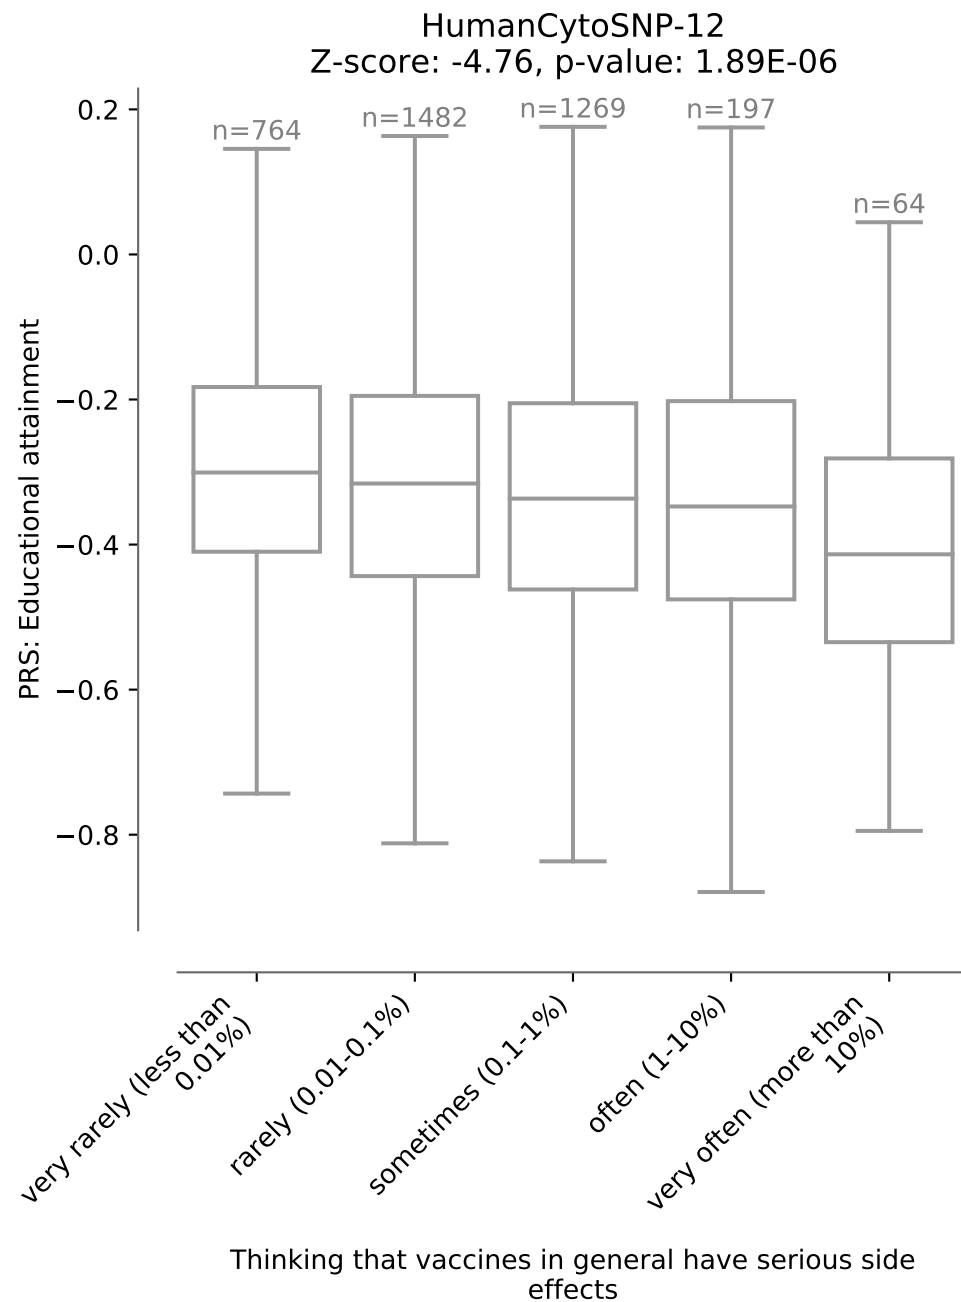

Thinking that vaccines in general have serious side effects

PGS: Neuroticism

Meta analysis Z-score: 4.59, p-value: 4.41E-06

Global Screening Array  
Z-score: 5.19, p-value: 2.08E-07

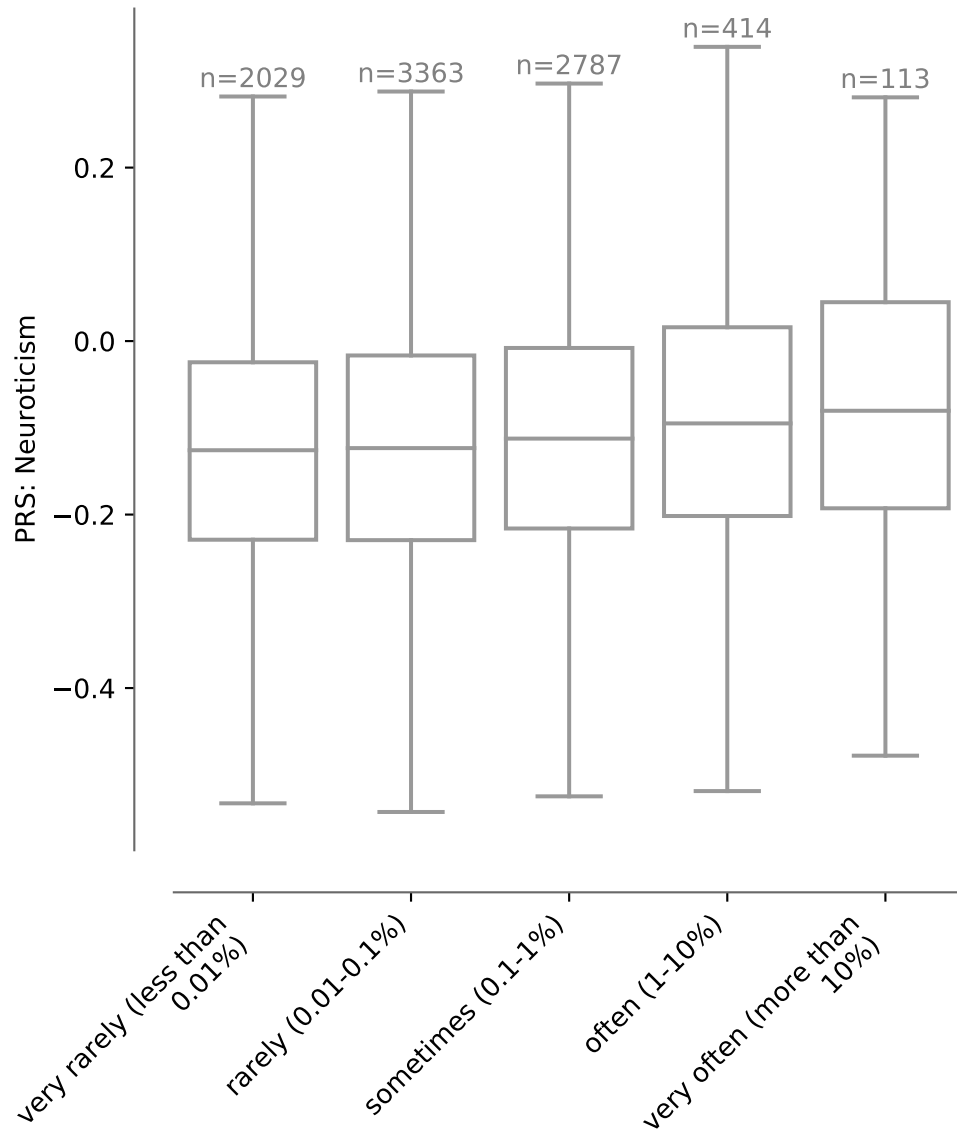

Thinking that vaccines in general have serious side effects

HumanCytoSNP-12  
Z-score: 0.48, p-value: 6.33E-01

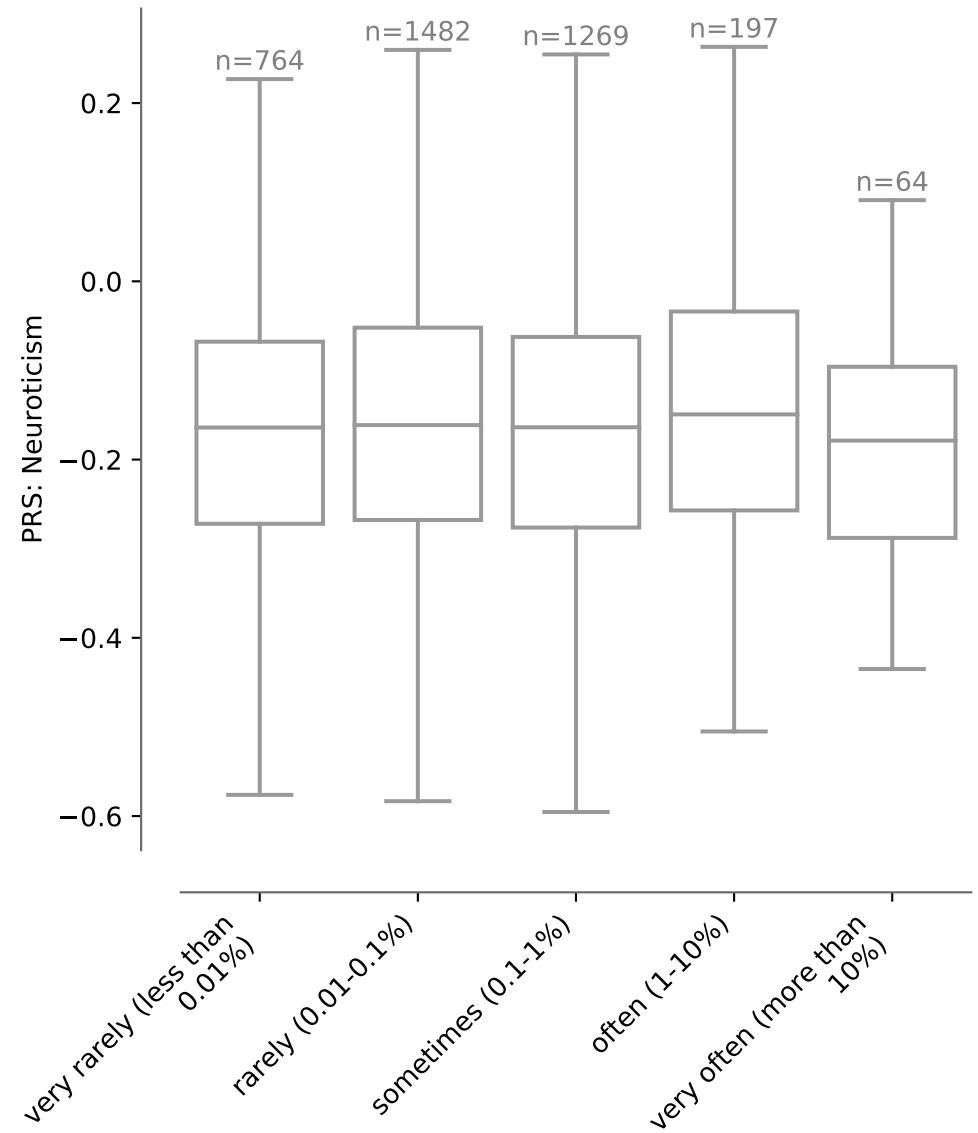

Thinking that vaccines in general have serious side effects

Limp or heavy feeling  
PGS: Depression  
Meta analysis Z-score: 5.27, p-value: 1.38E-07

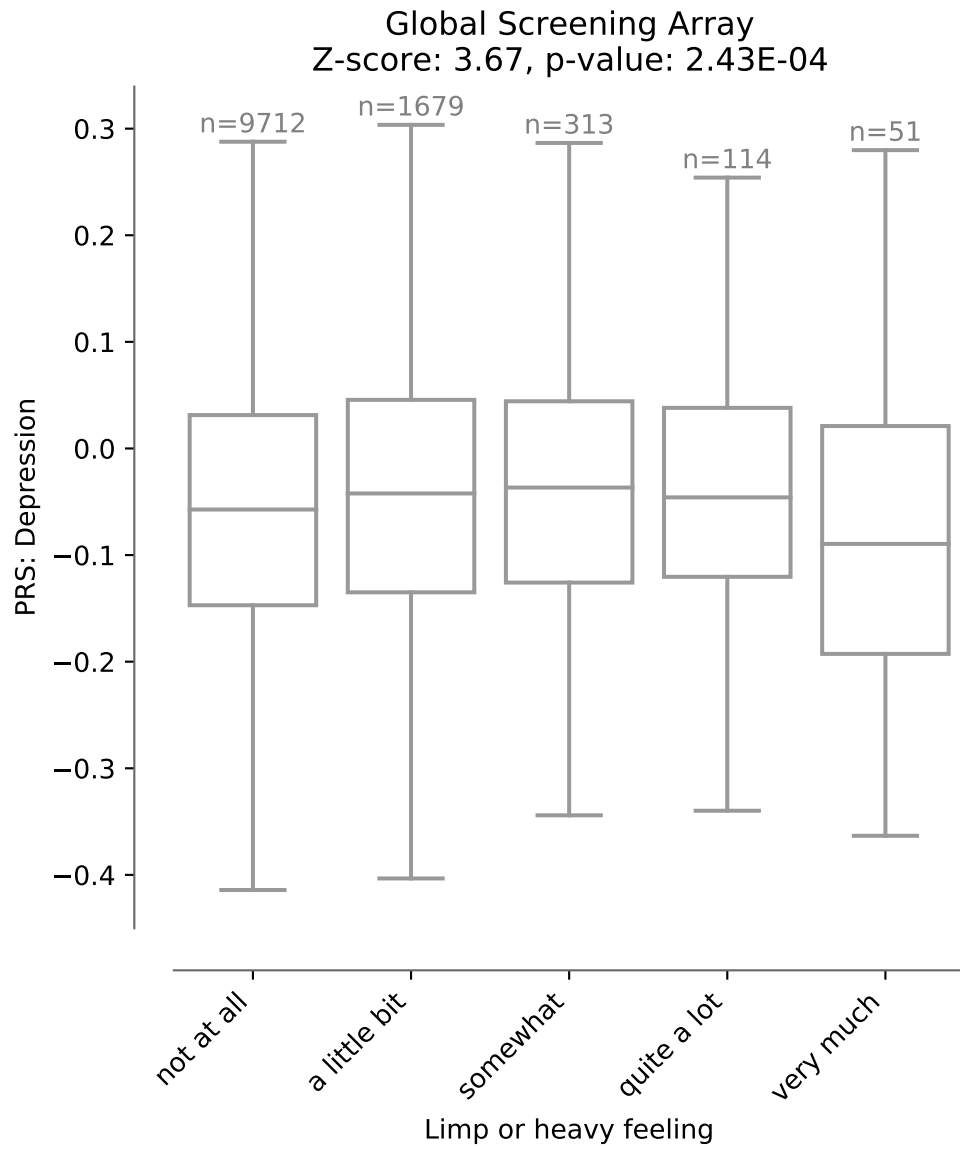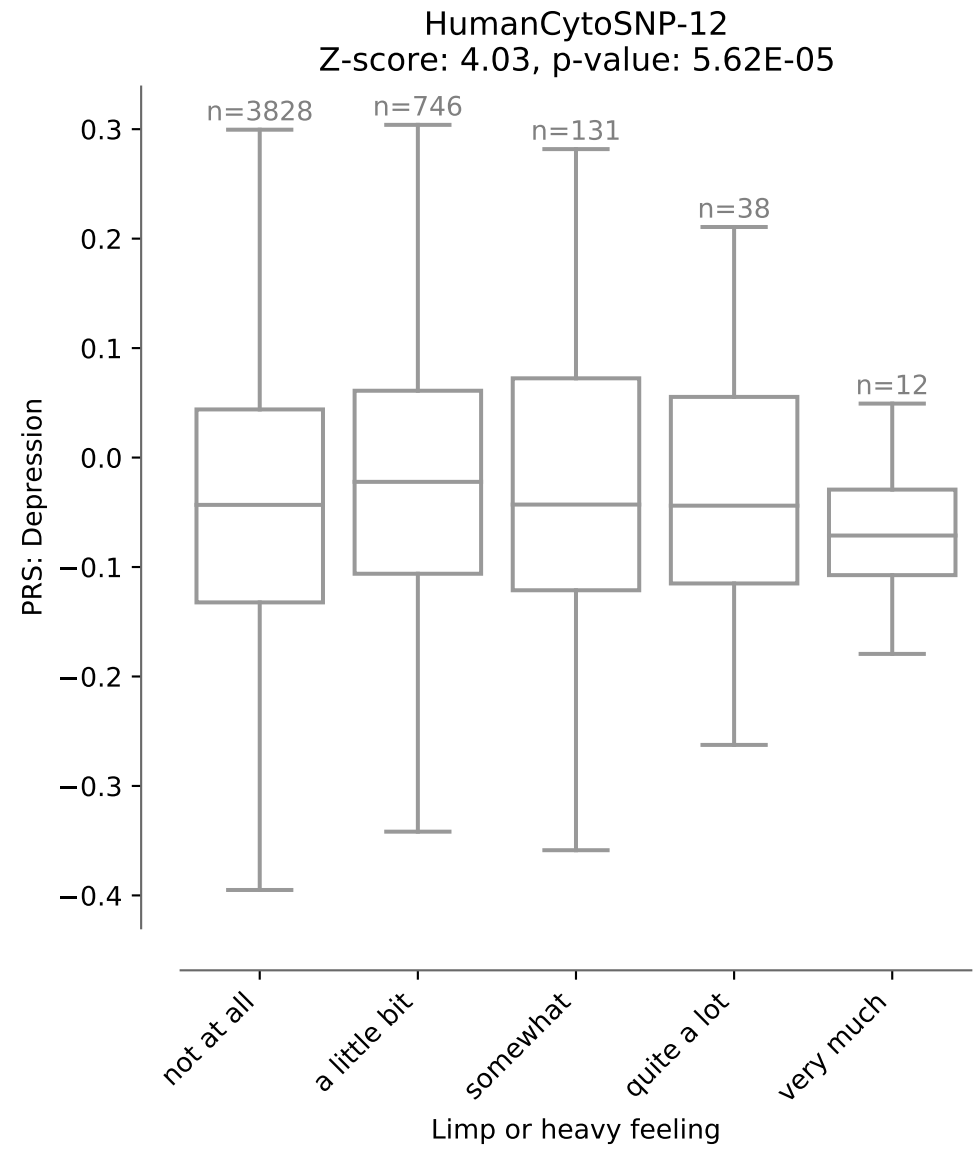

Limp or heavy feeling  
PGS: Life satisfaction  
Meta analysis Z-score: -8.60, p-value: 8.05E-18

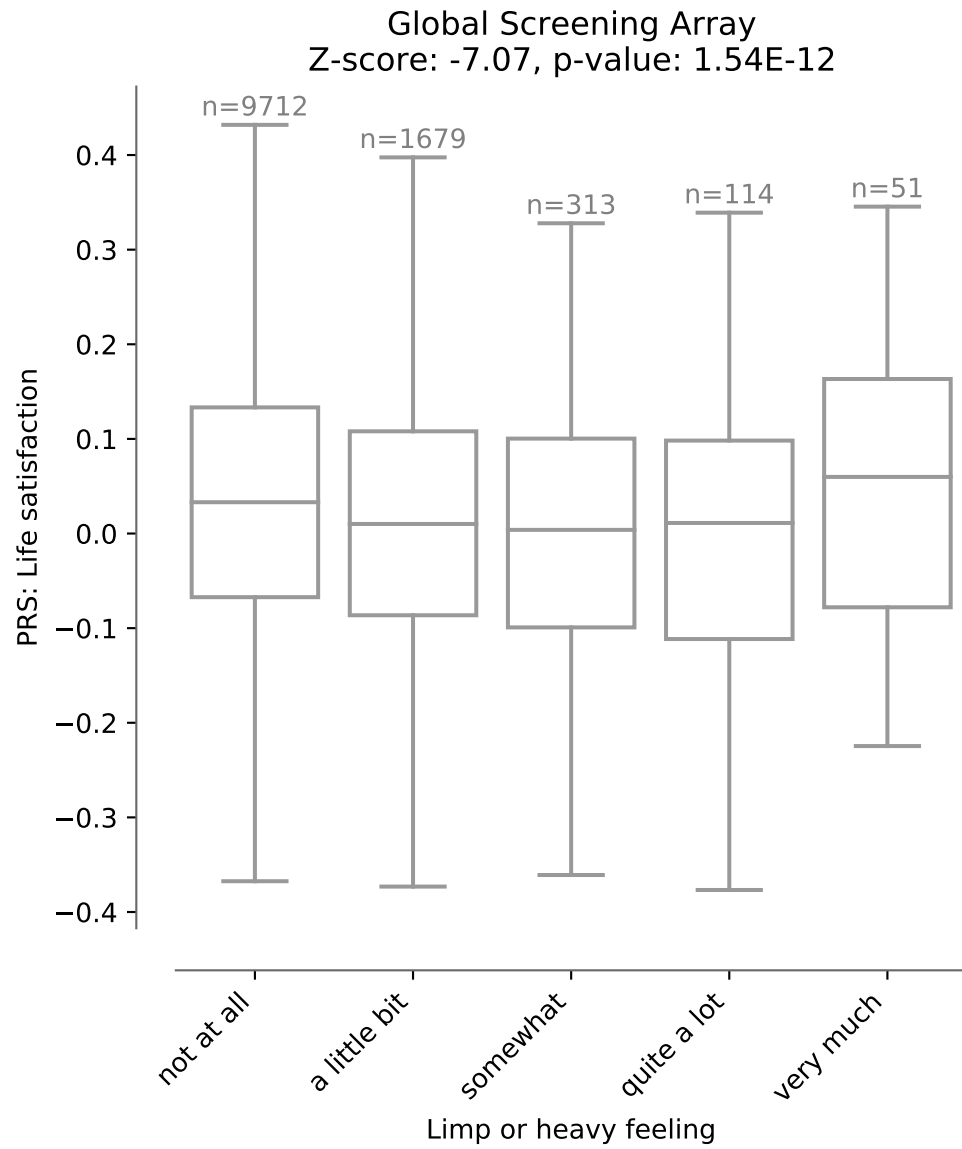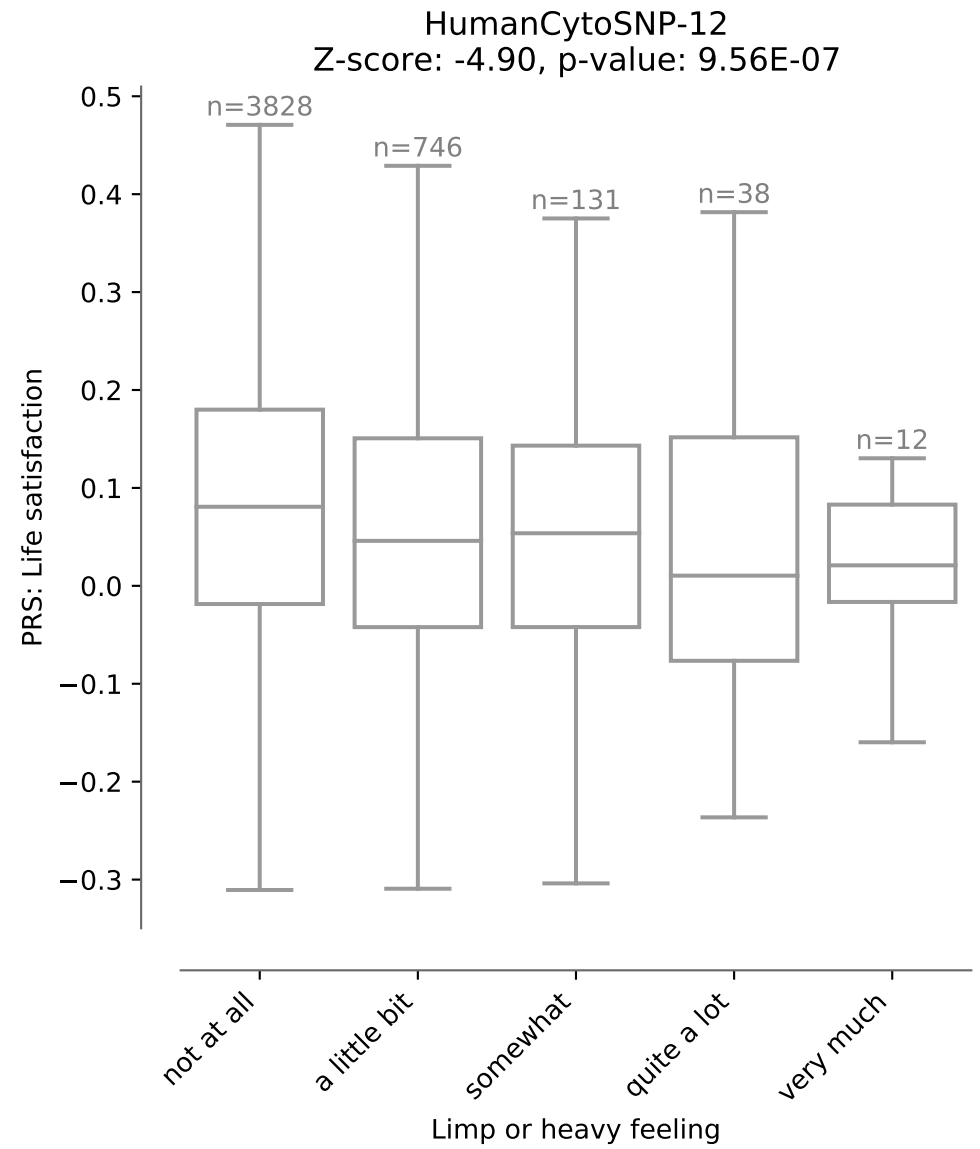

Limp or heavy feeling  
PGS: Neuroticism  
Meta analysis Z-score: 6.84, p-value: 8.01E-12

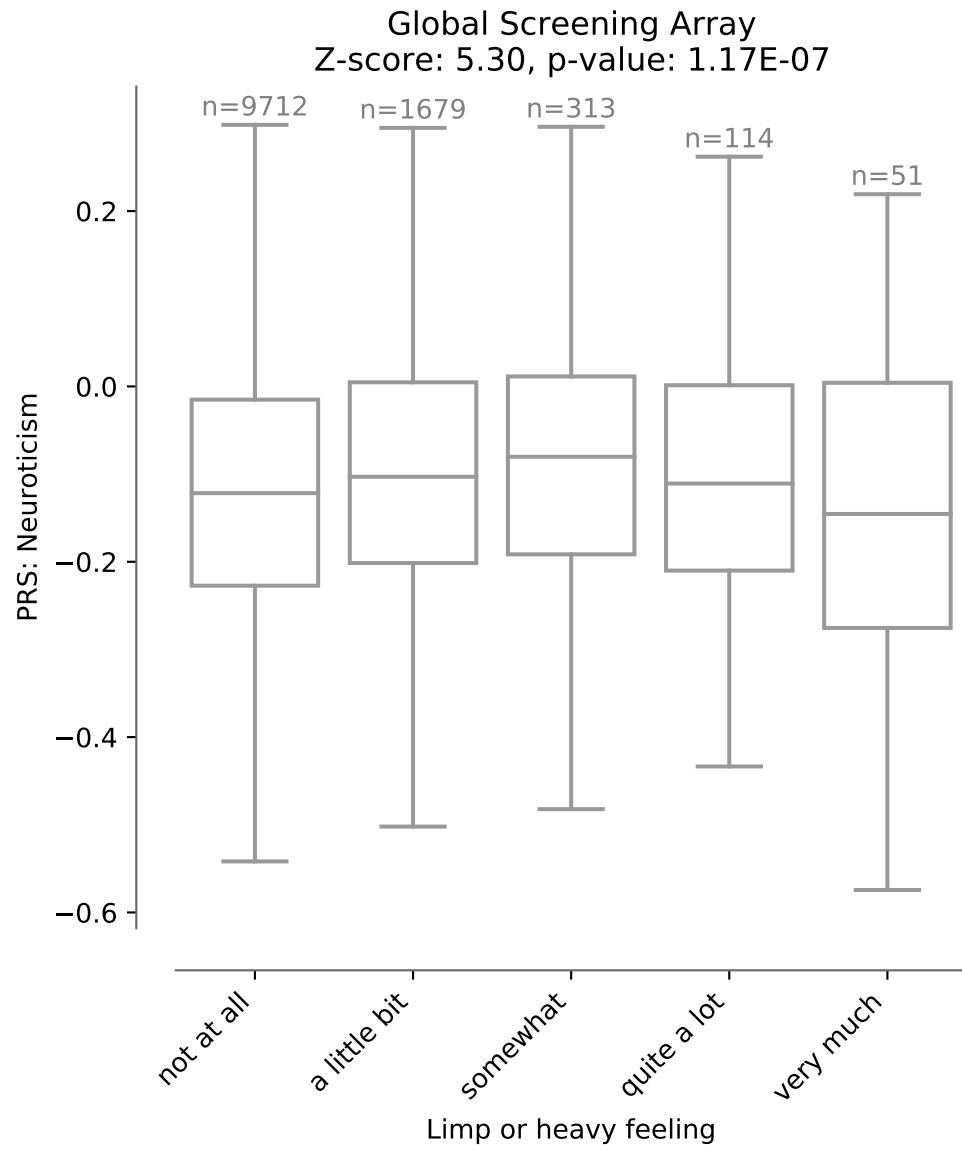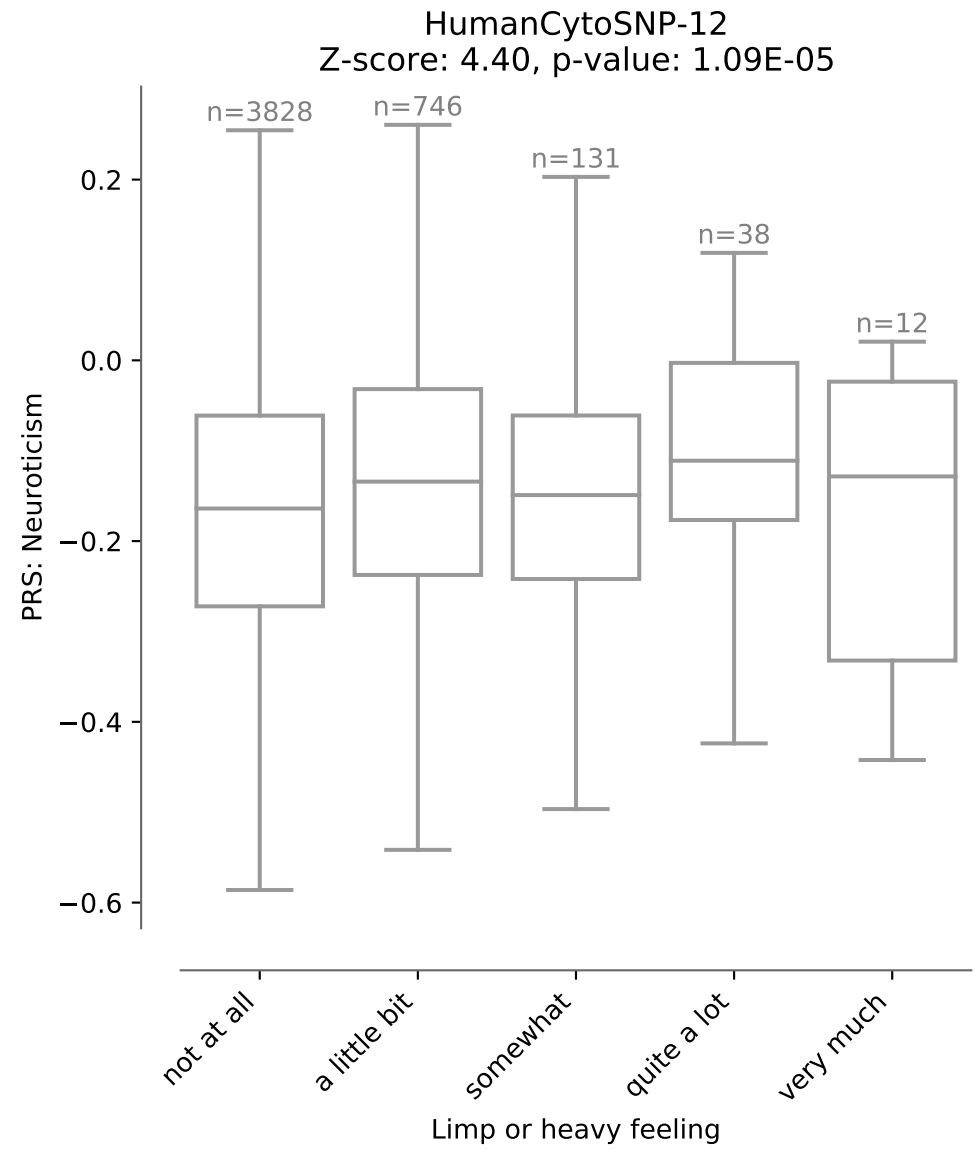

Limp or heavy feeling  
PGS: Schizophrenia  
Meta analysis Z-score: 6.56, p-value: 5.24E-11

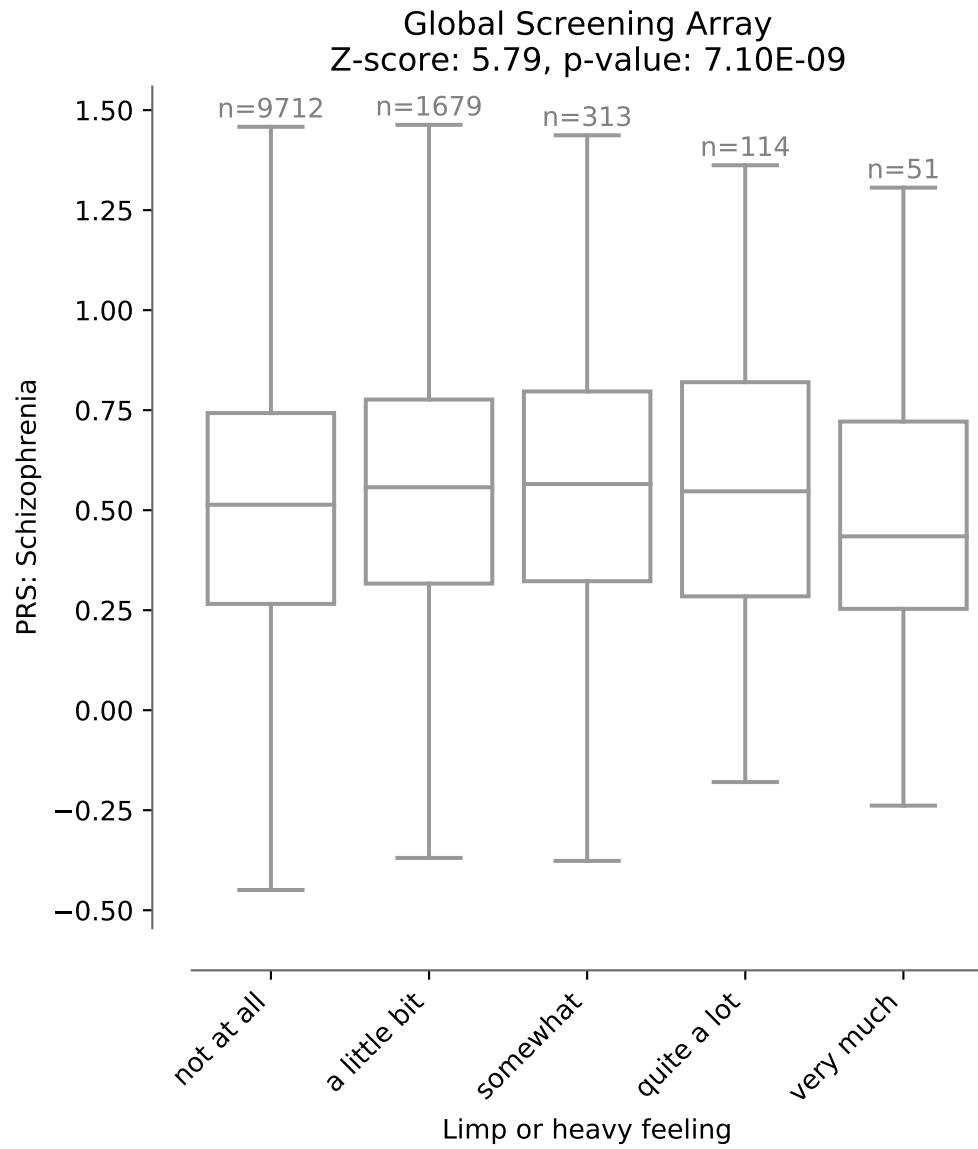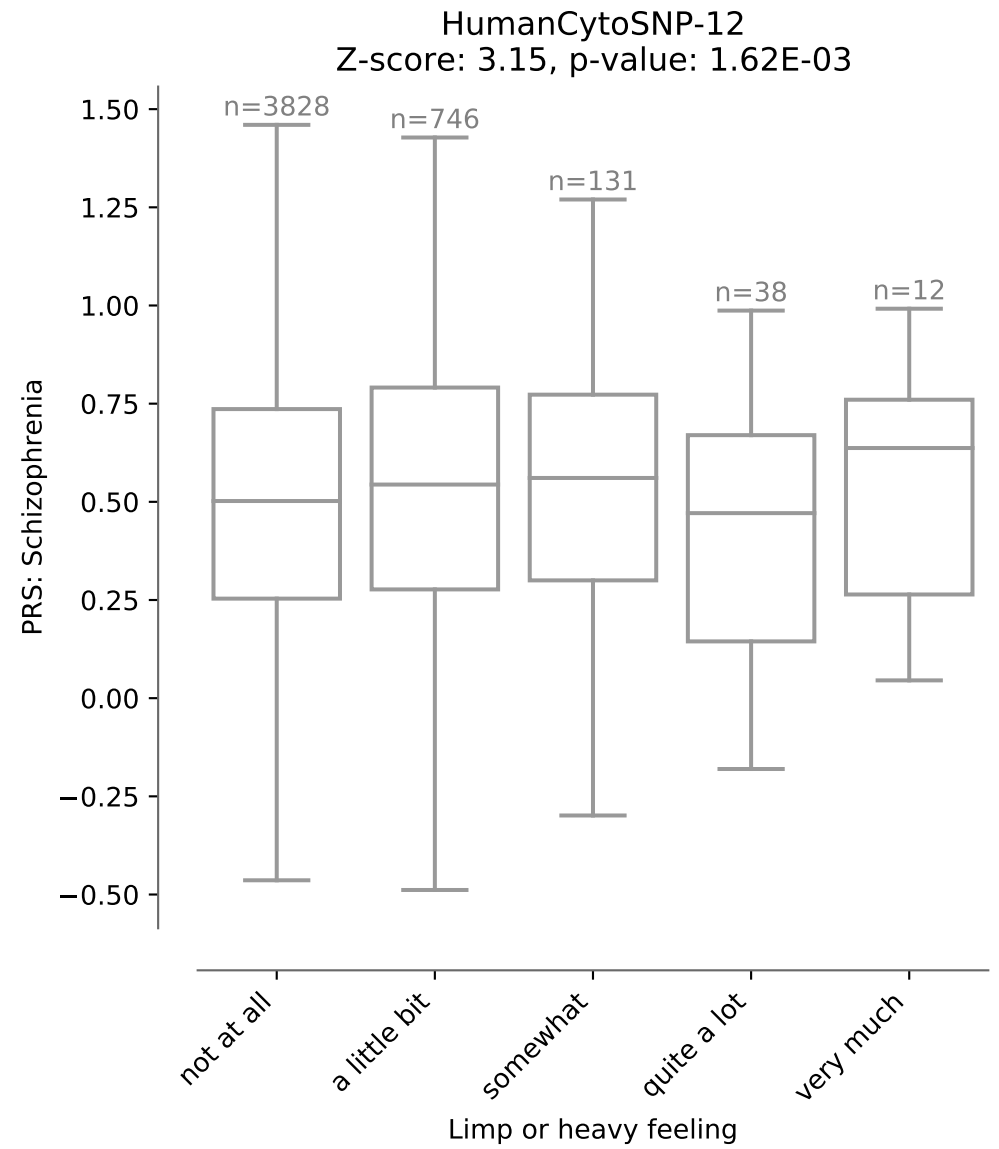



Suddenly feeling warm and cold  
PGS: Life satisfaction  
Meta analysis Z-score: -5.97, p-value: 2.41E-09

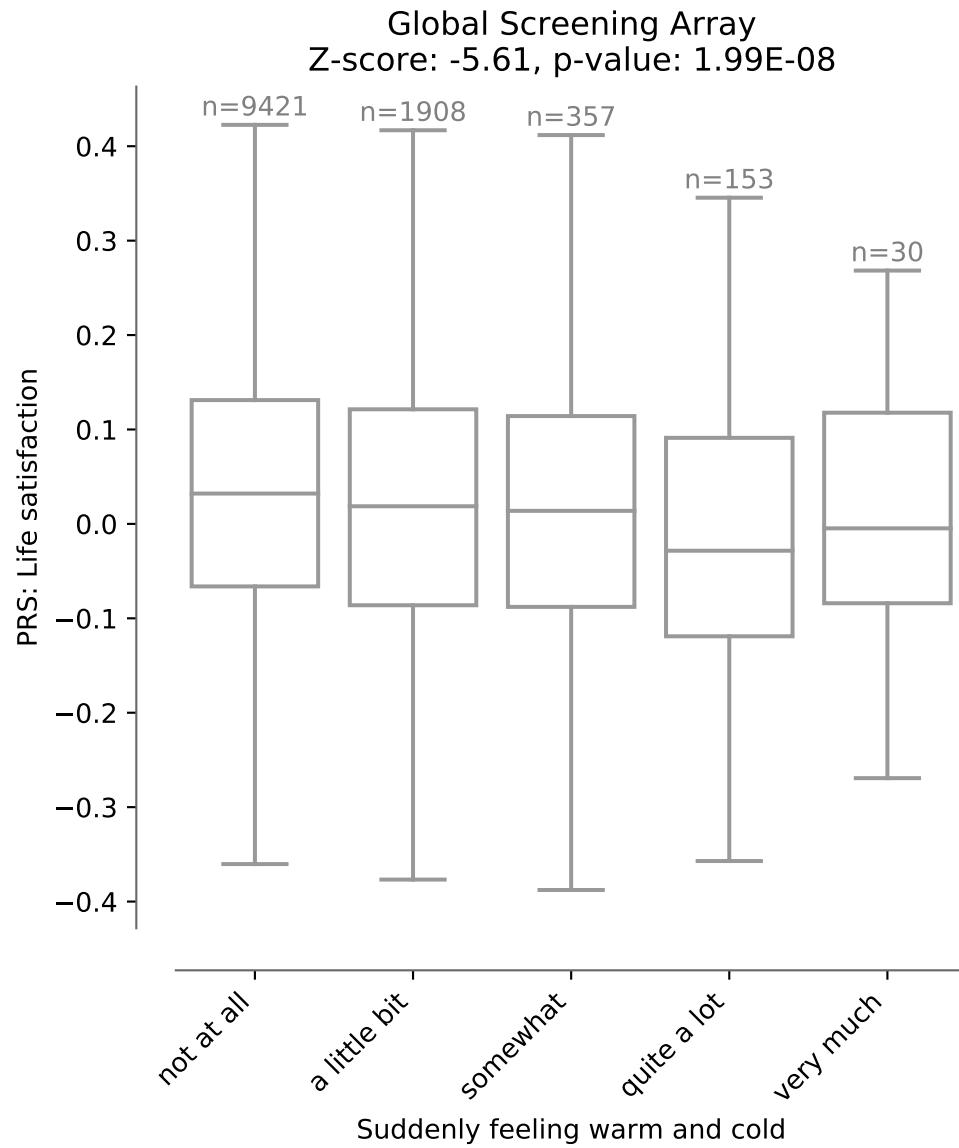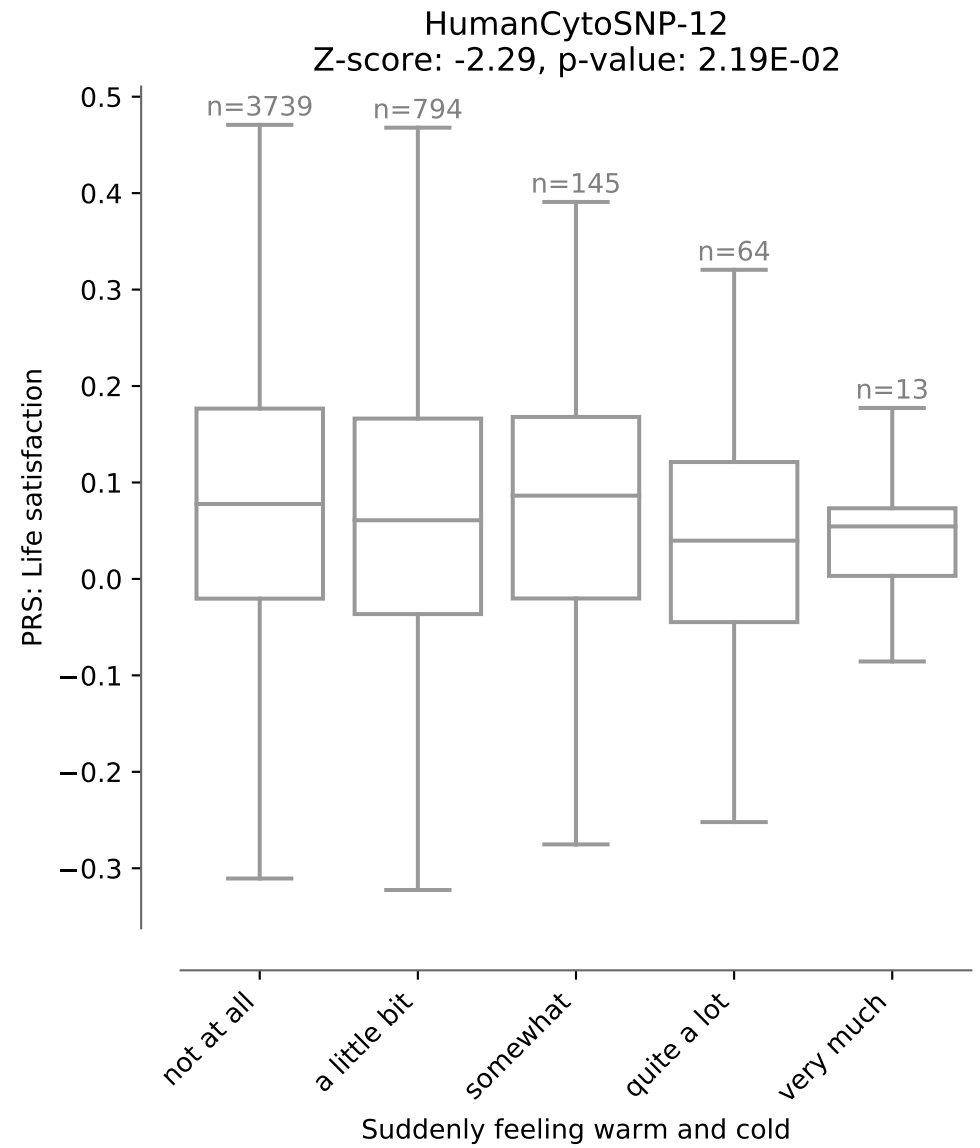

Suddenly feeling warm and cold  
PGS: Neuroticism  
Meta analysis Z-score: 5.49, p-value: 4.10E-08

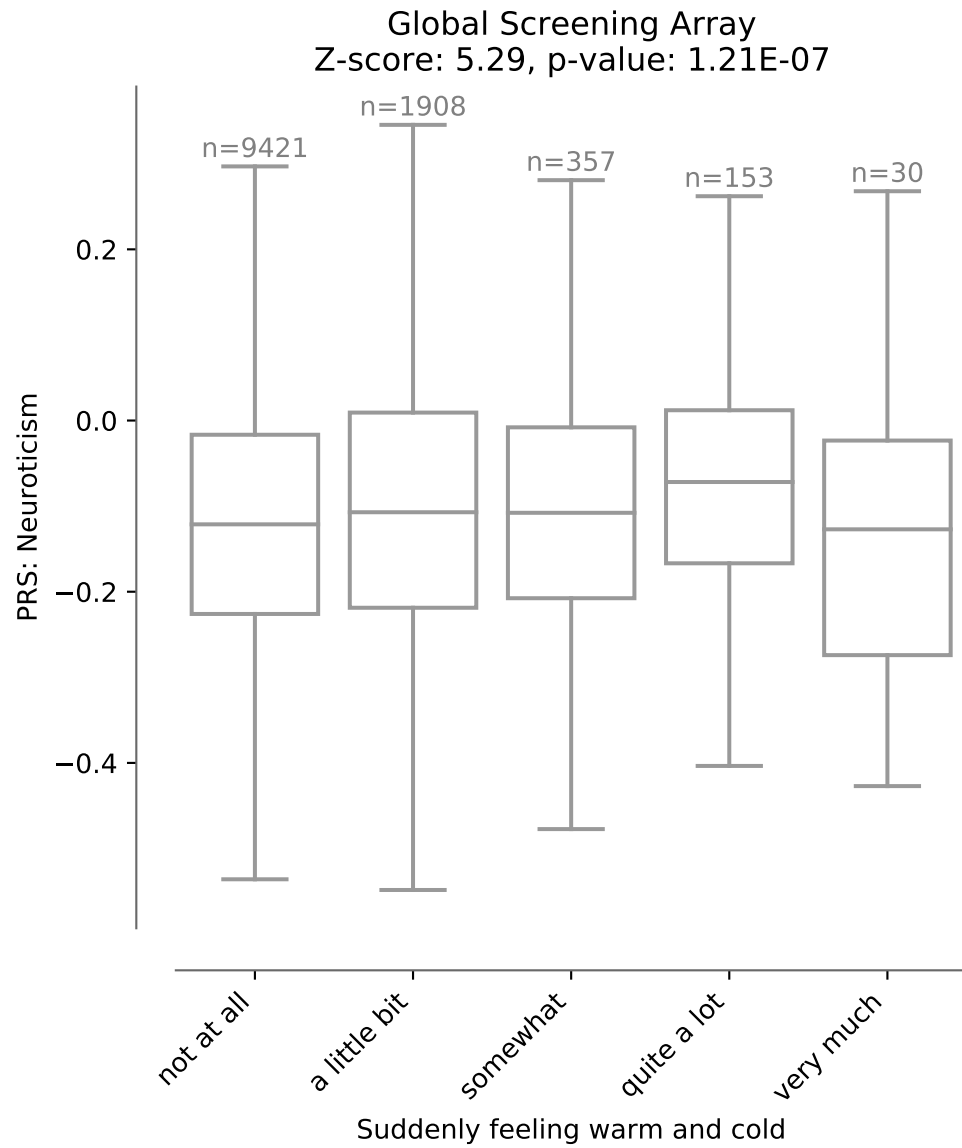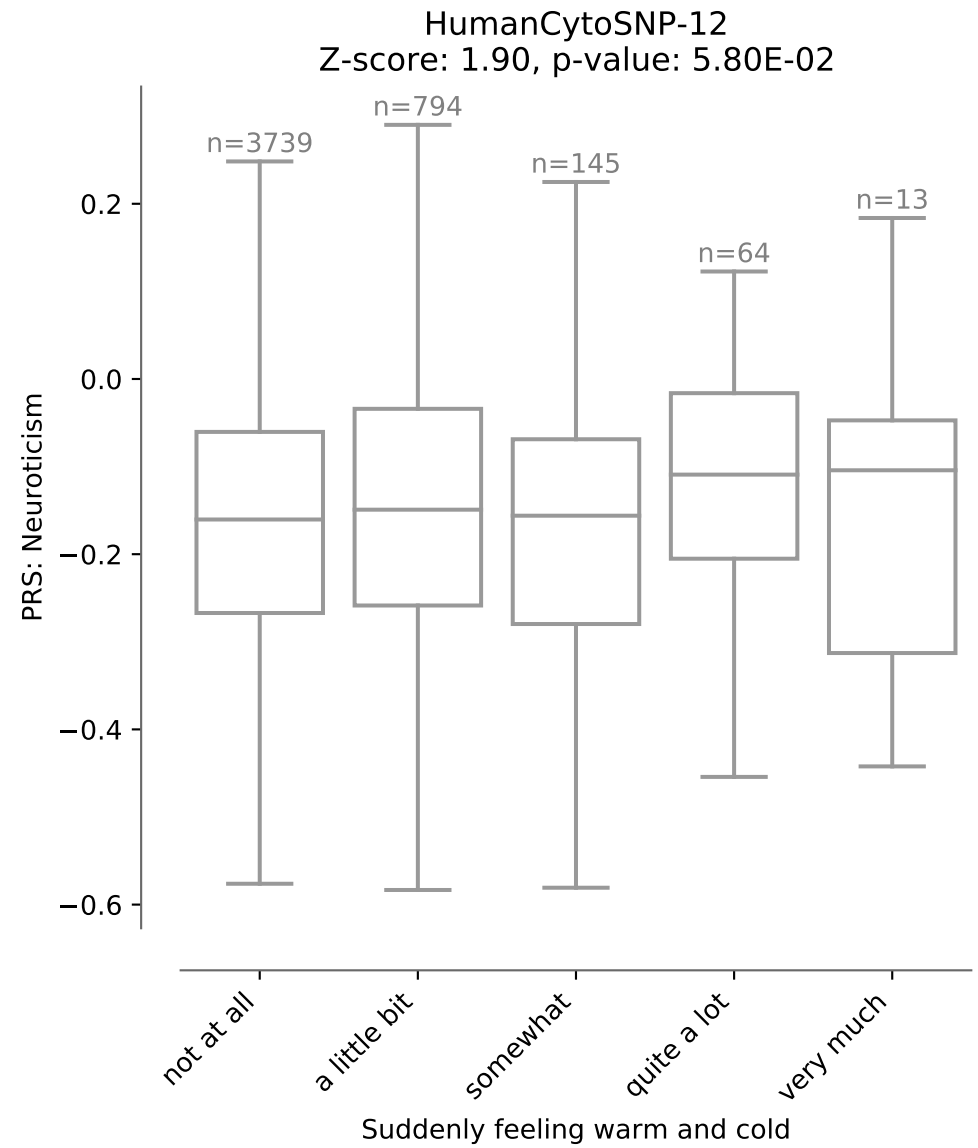

Finding that young people can do what they want if they keep enough distance

PGS: Educational attainment

Meta analysis Z-score: 4.58, p-value: 4.68E-06

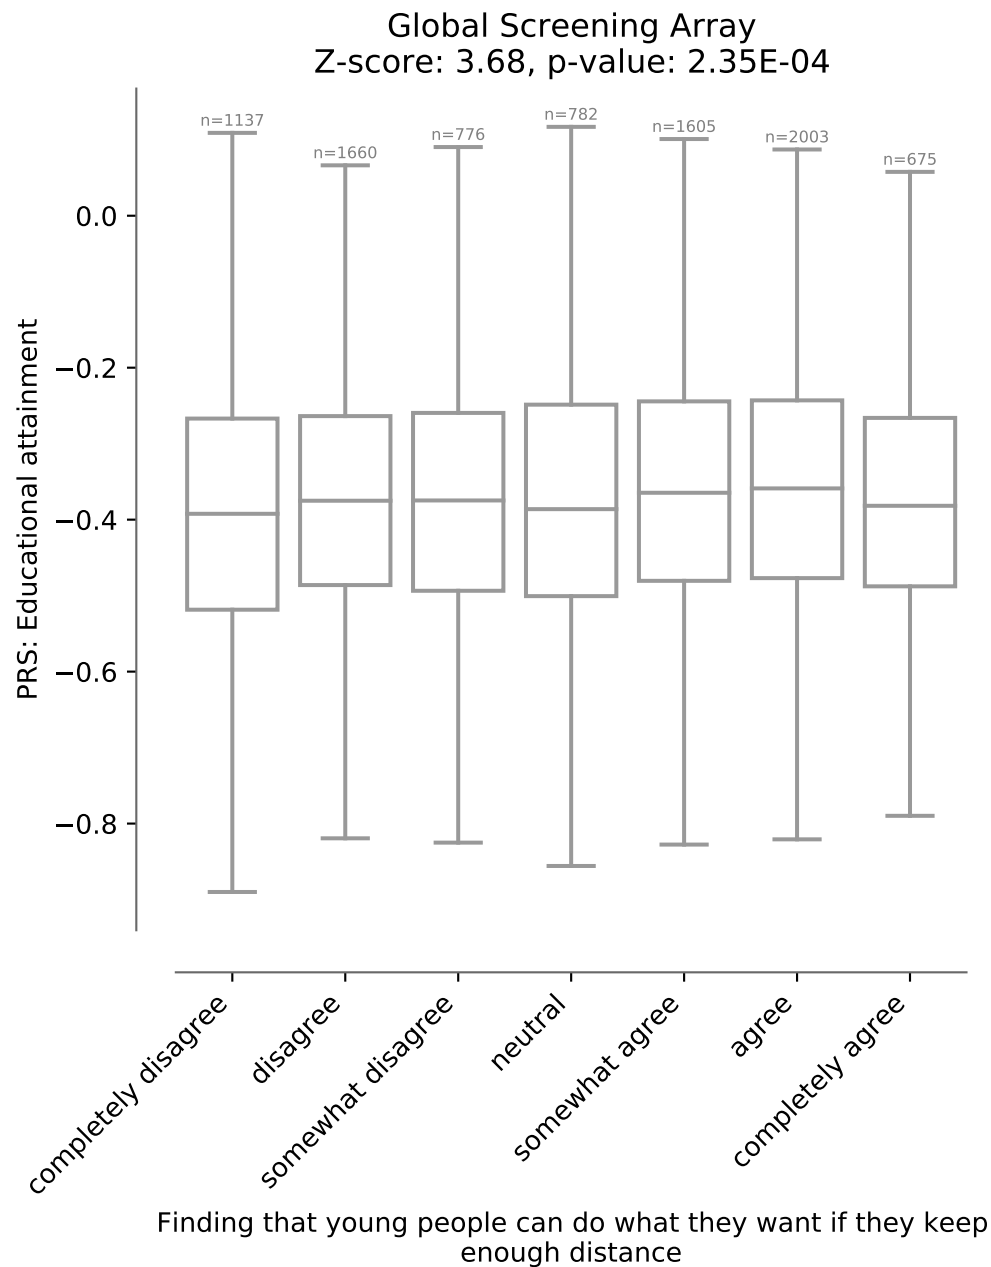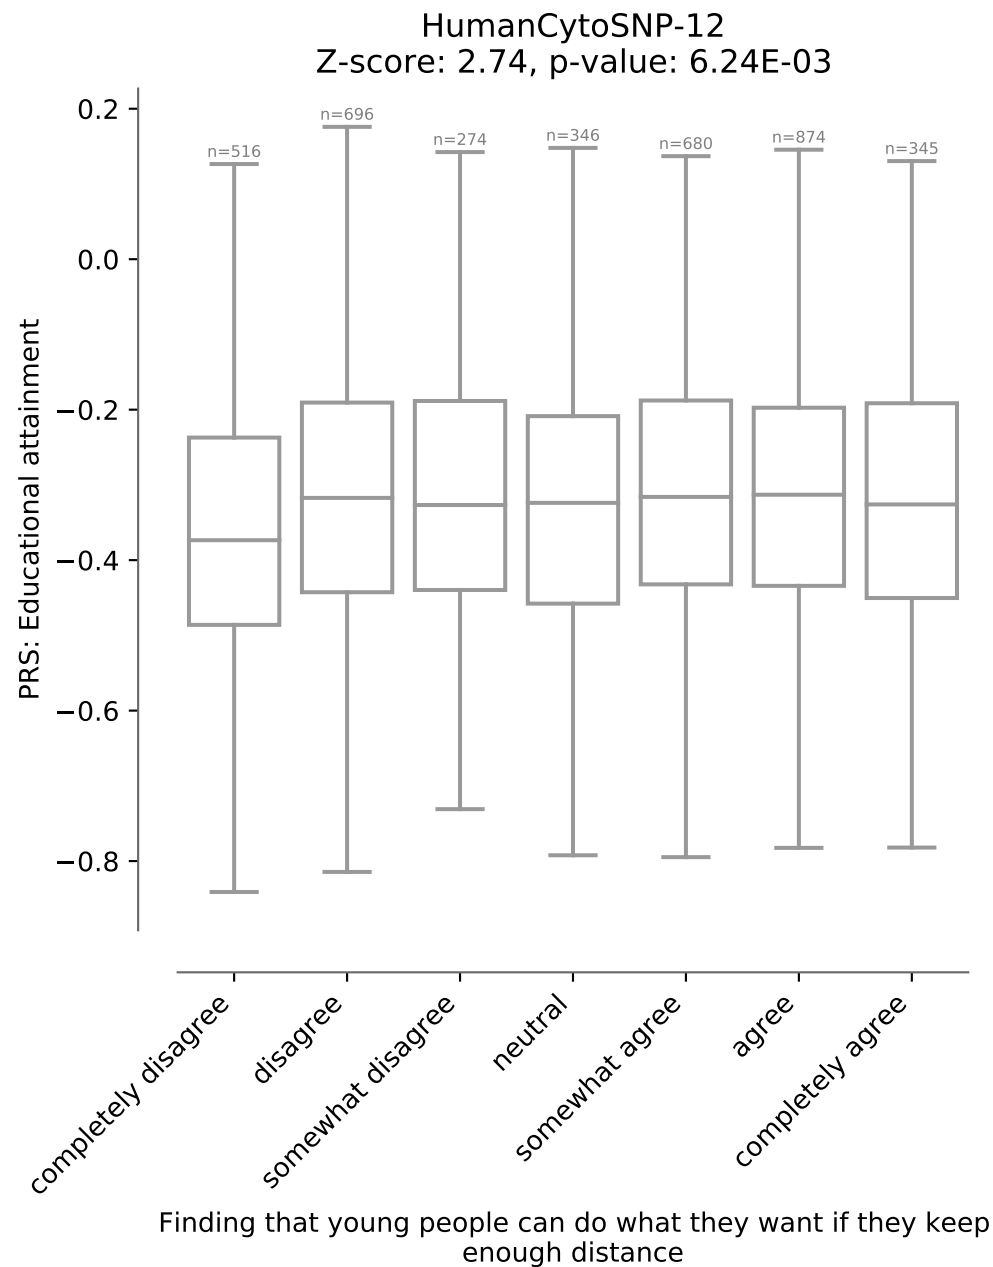

Had sore throat  
PGS: Depression  
Meta analysis Z-score: 5.79, p-value: 6.99E-09

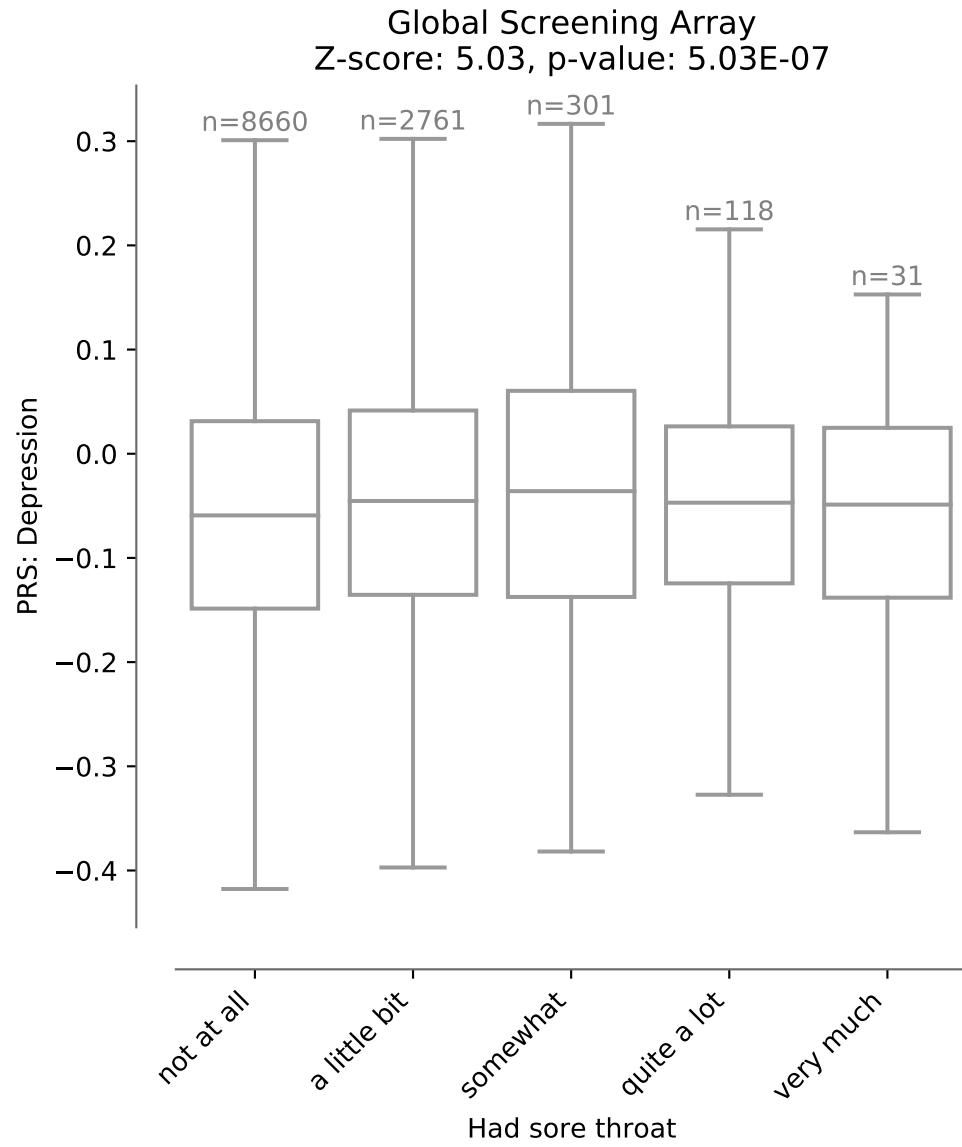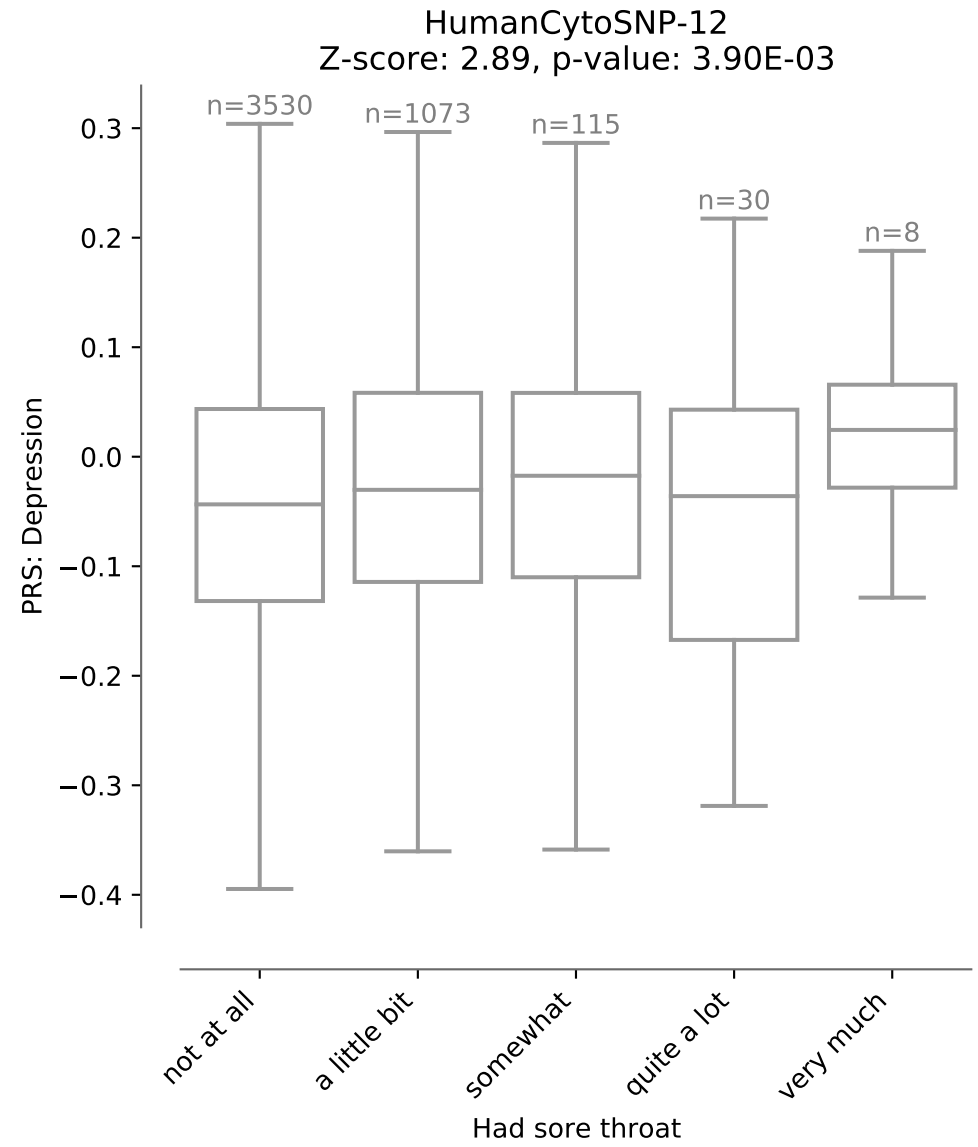

Had sore throat  
PGS: General risk tolerance  
Meta analysis Z-score: 4.45, p-value: 8.53E-06

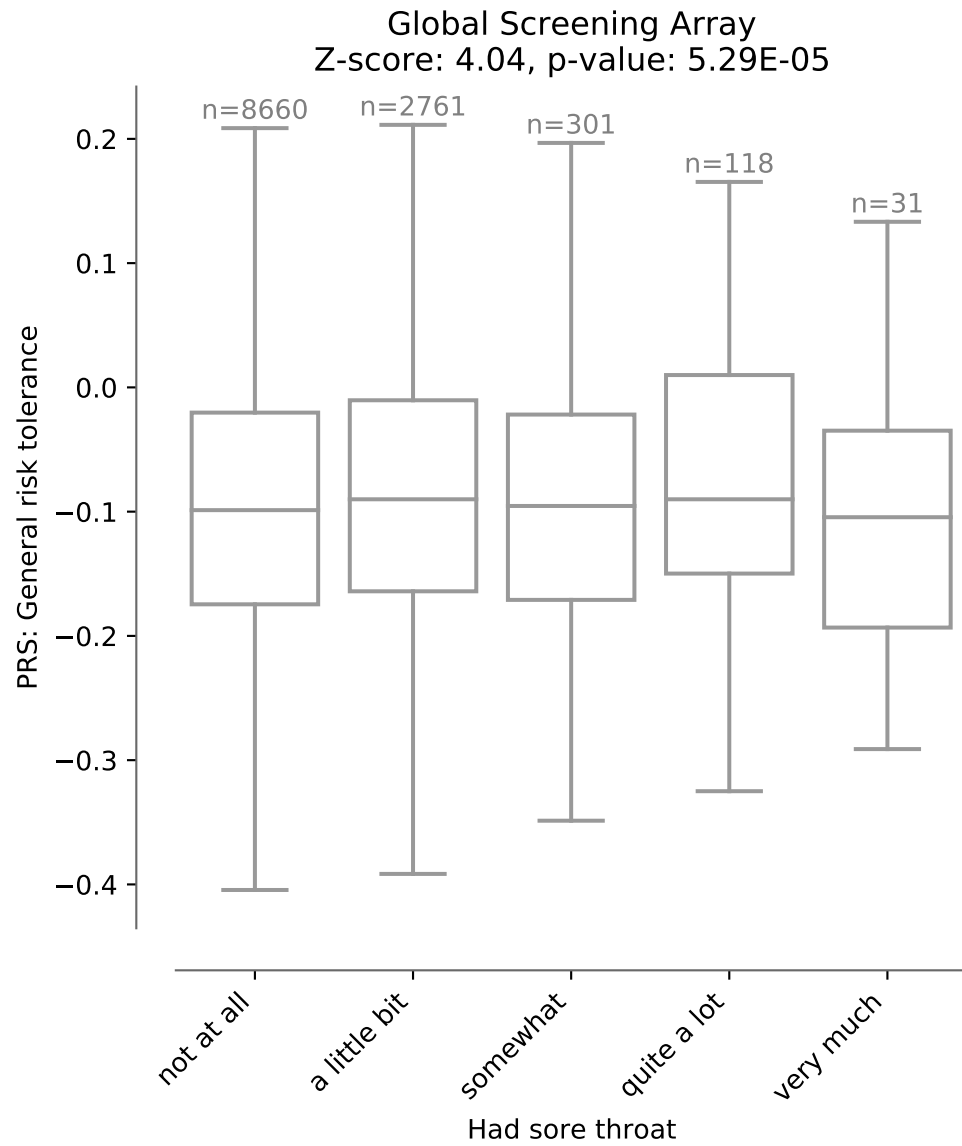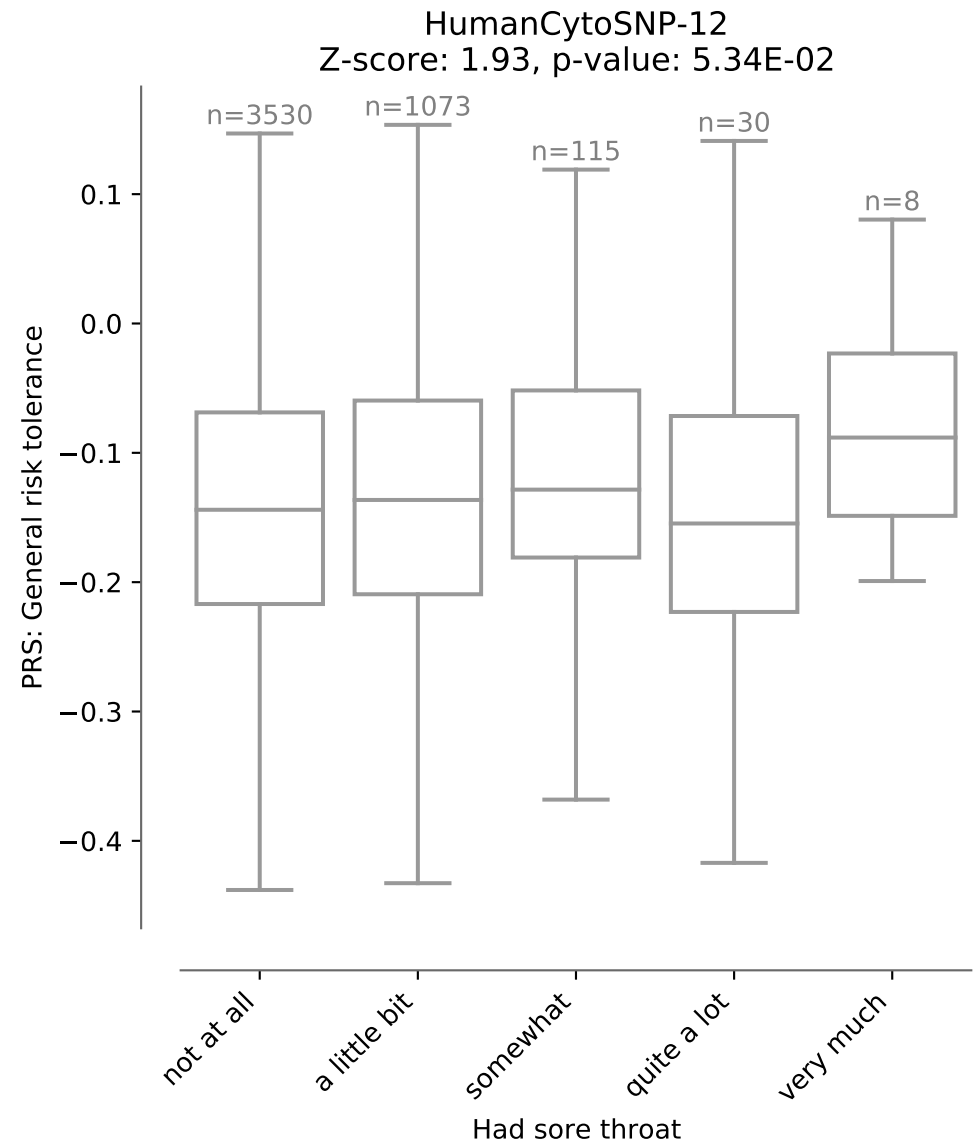

Had sore throat  
PGS: Life satisfaction  
Meta analysis Z-score: -5.64, p-value: 1.66E-08

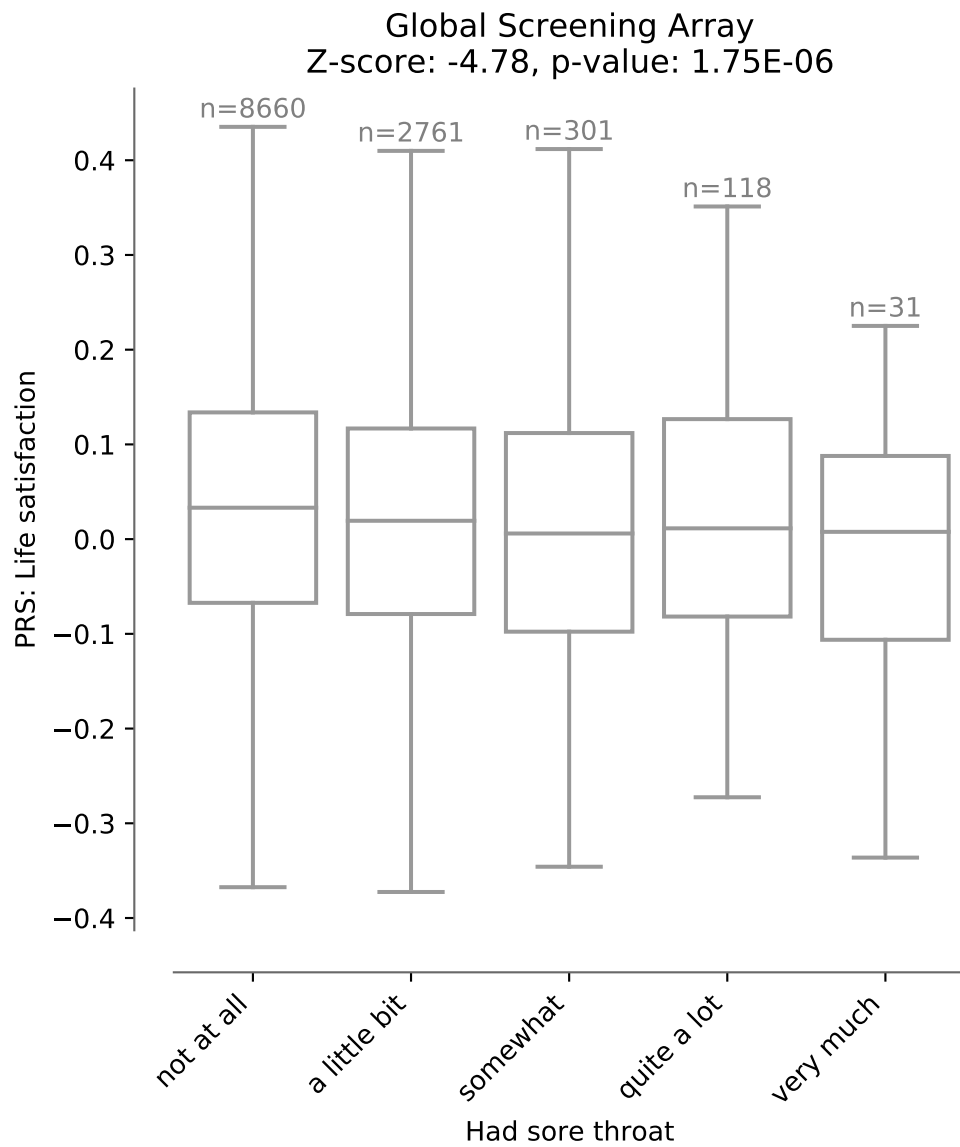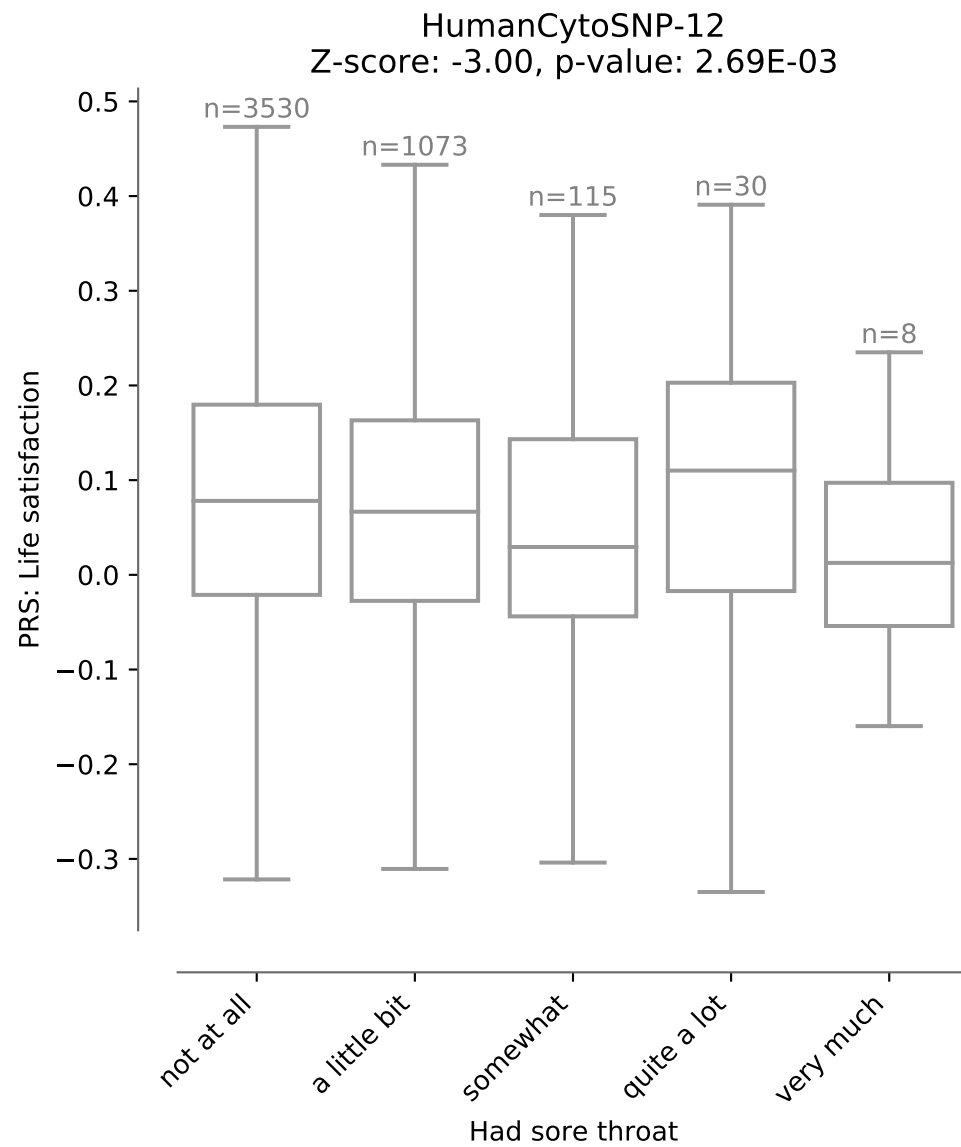

Had sore throat  
PGS: Neuroticism  
Meta analysis Z-score: 4.46, p-value: 8.12E-06

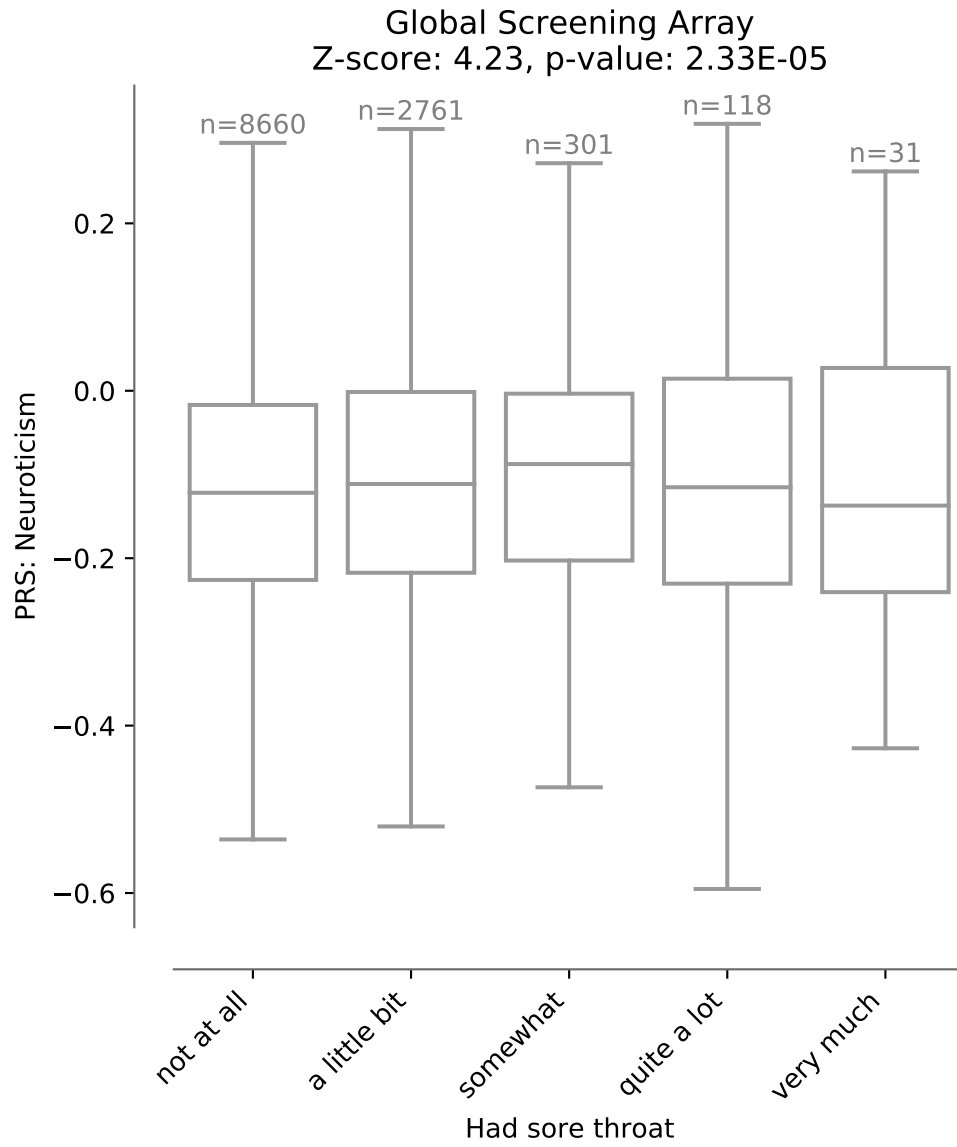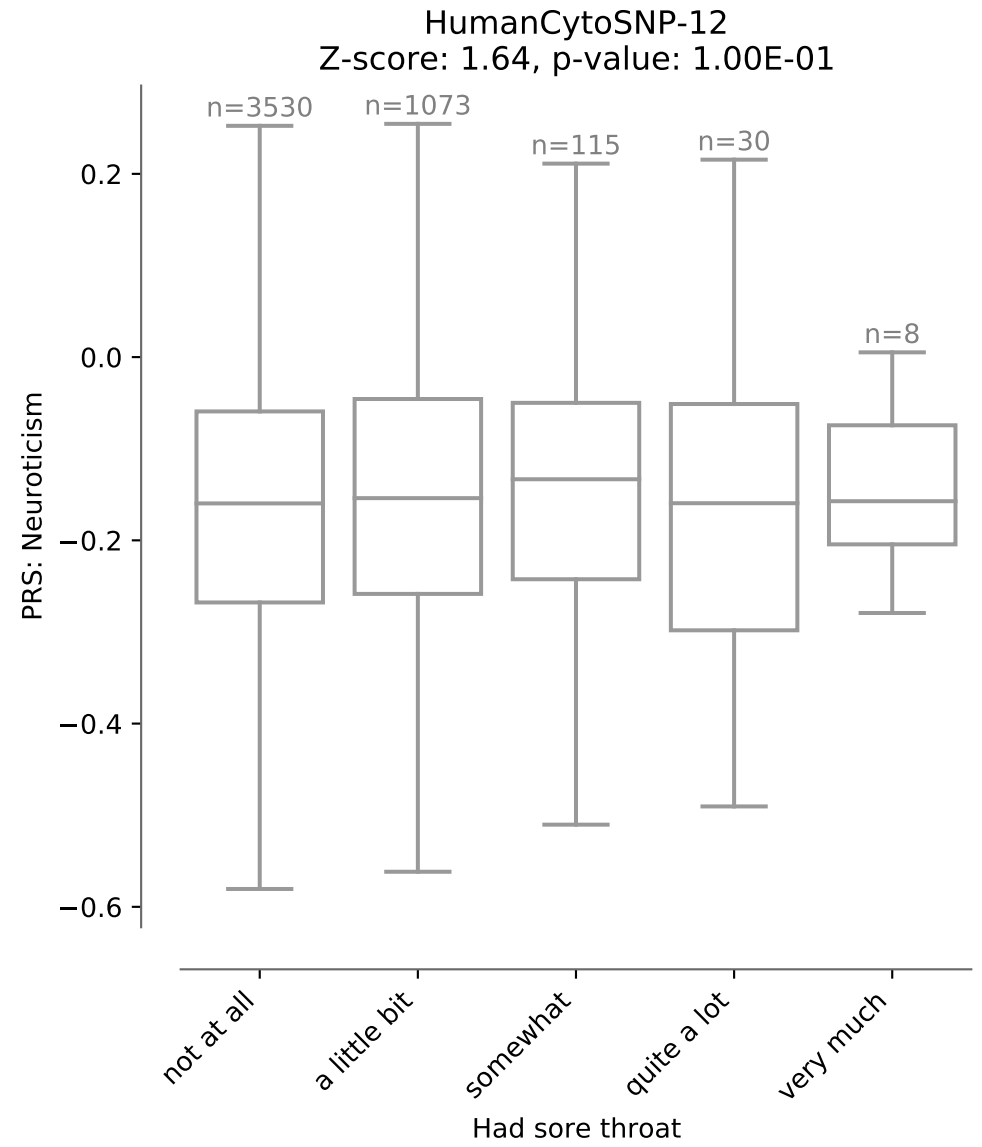

Had sore throat  
PGS: Schizophrenia  
Meta analysis Z-score: 6.34, p-value: 2.36E-10

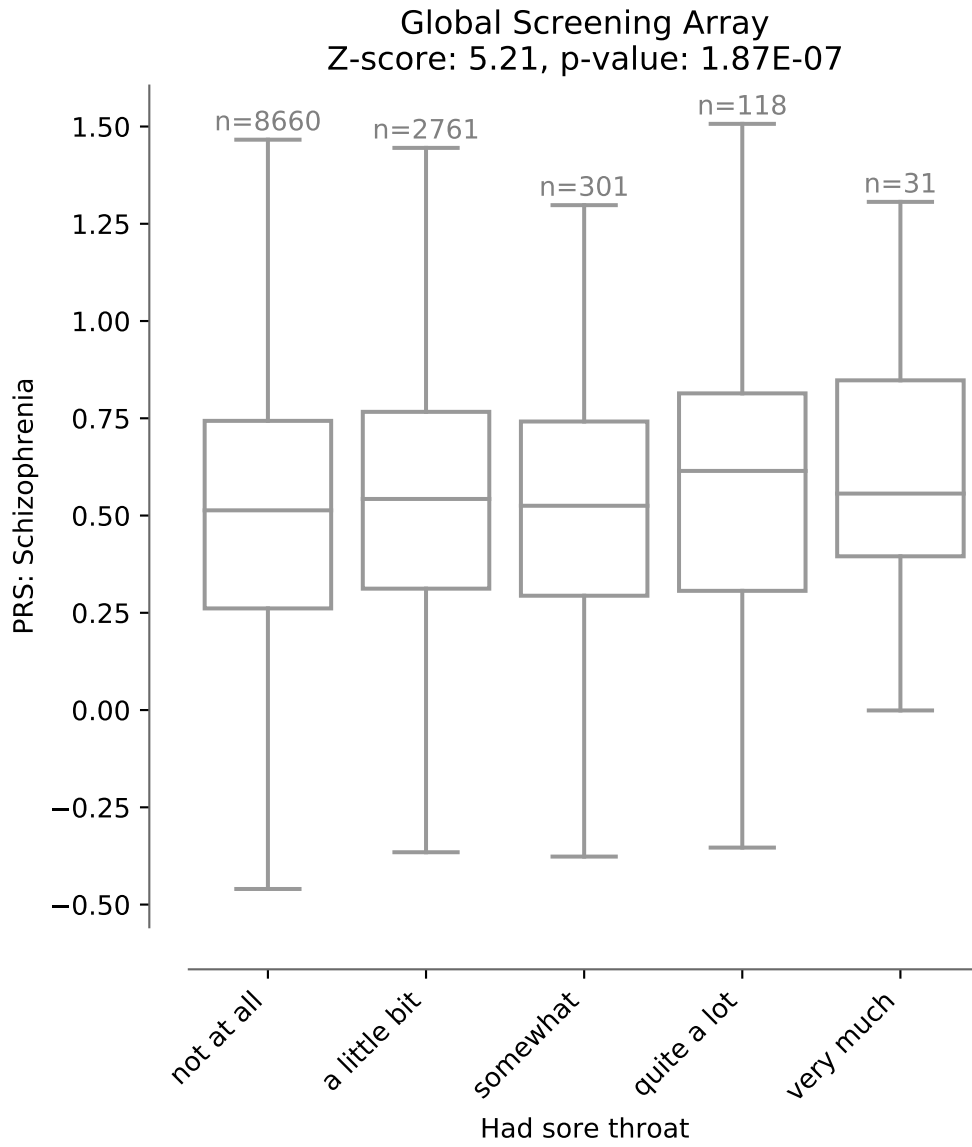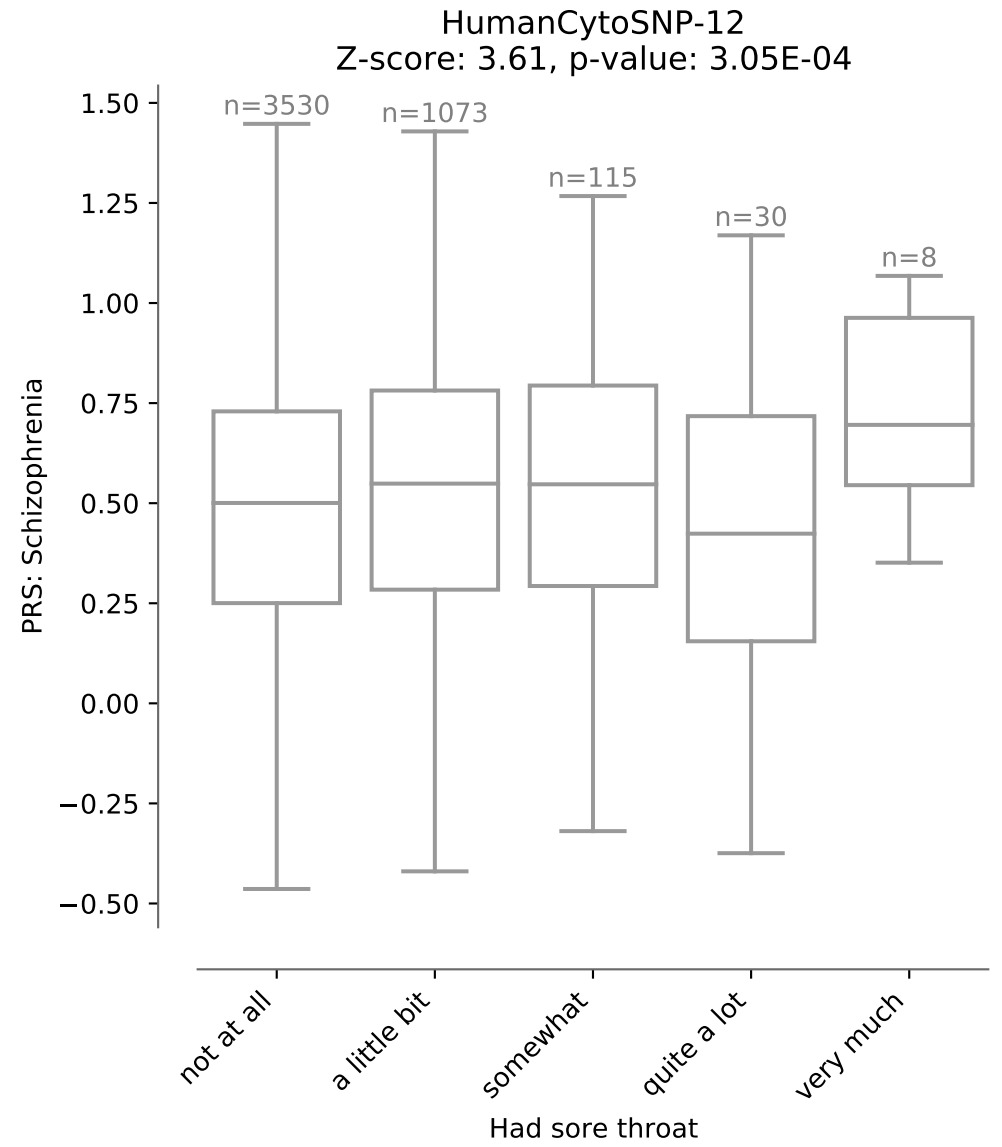



Difficult to concentrate or make decisions  
PGS: Depression  
Meta analysis Z-score: 5.37, p-value: 7.68E-08

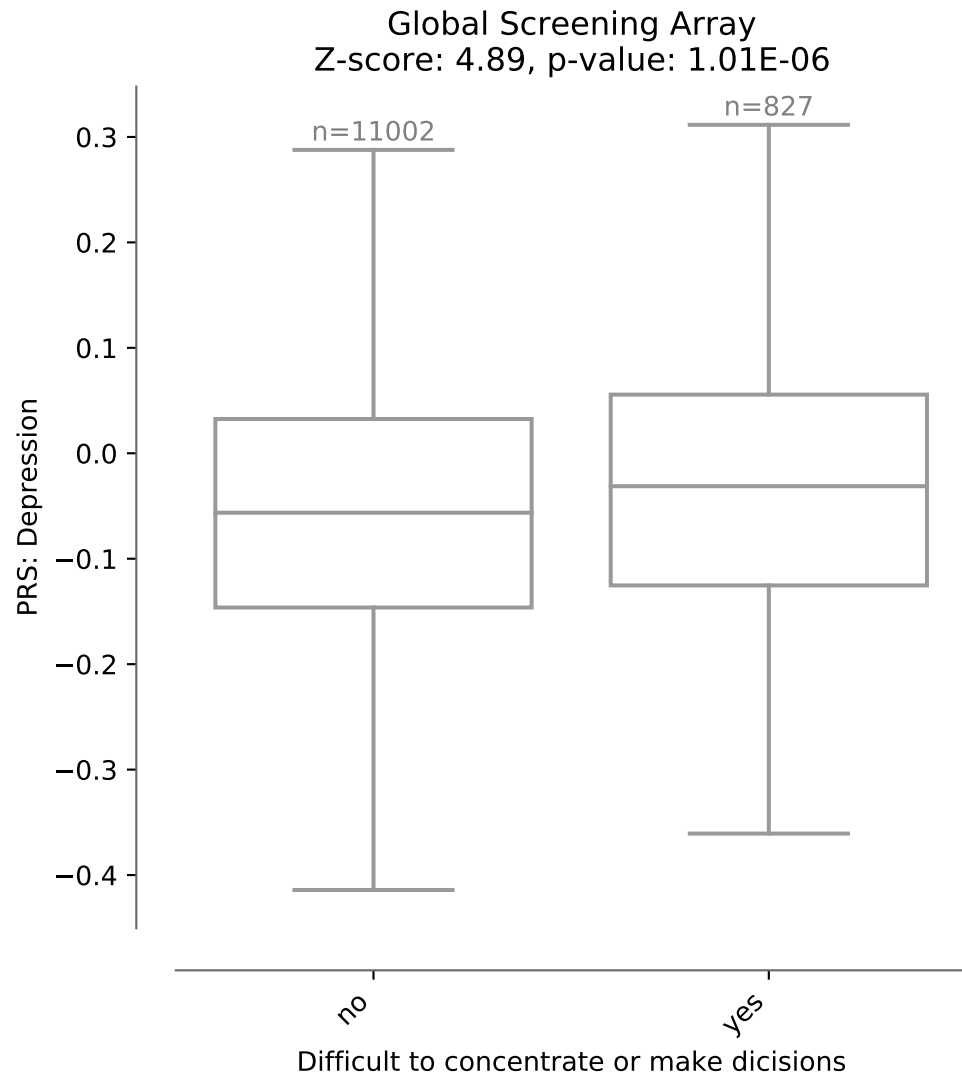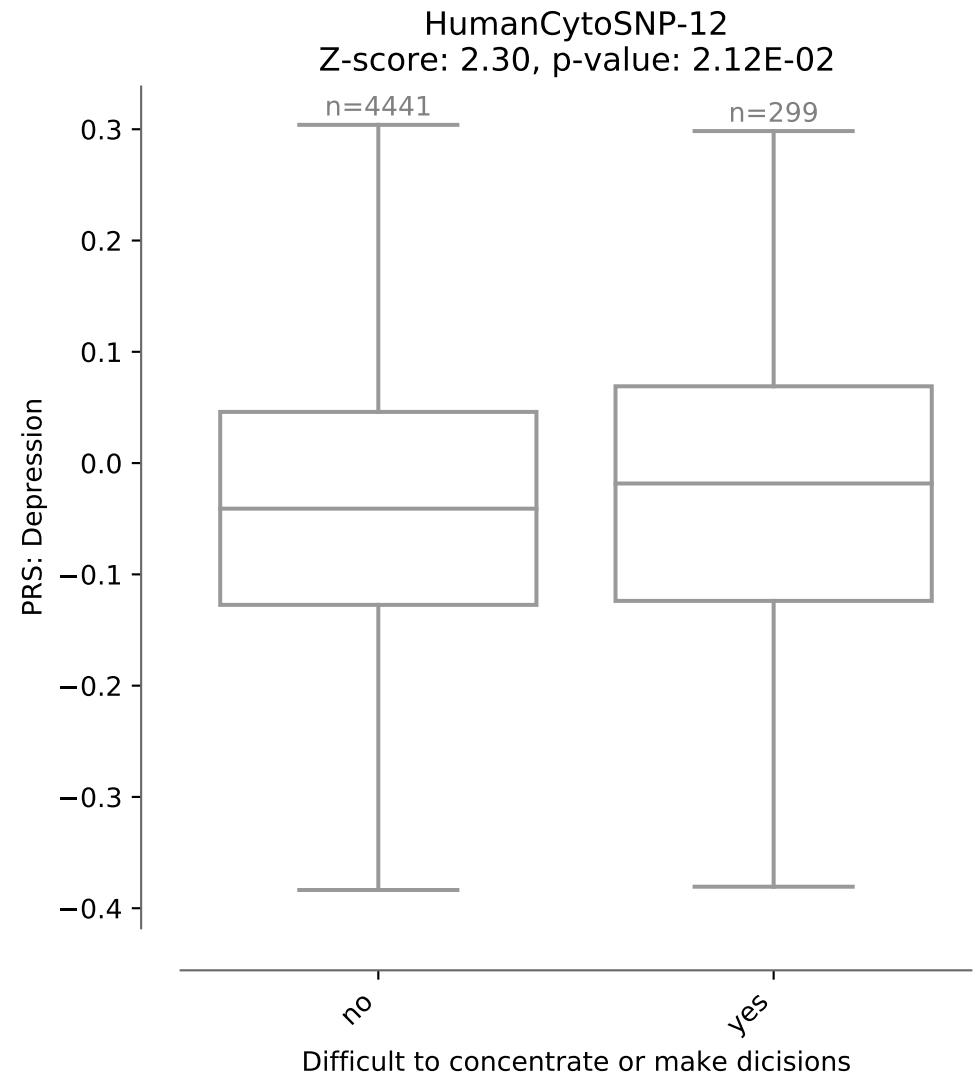

Difficult to concentrate or make decisions  
PGS: Life satisfaction  
Meta analysis Z-score: -7.72, p-value: 1.13E-14

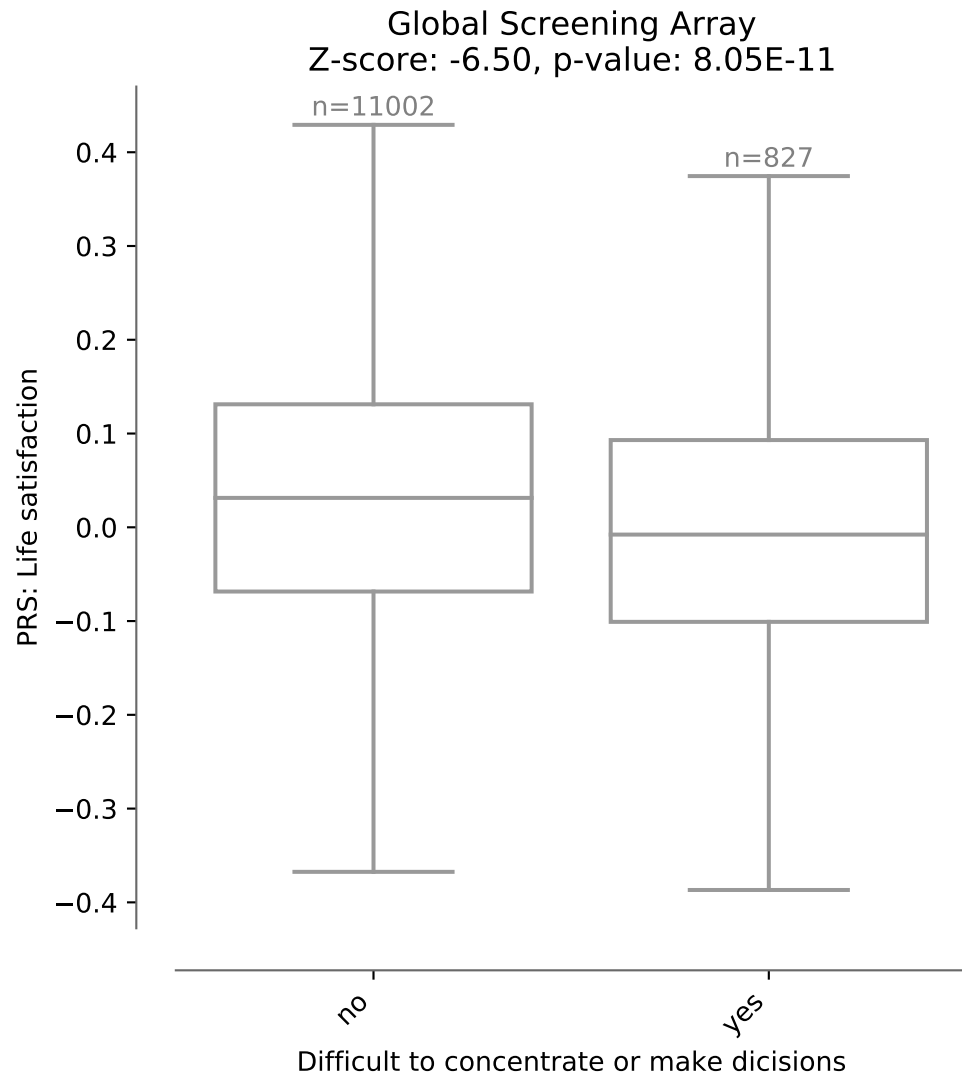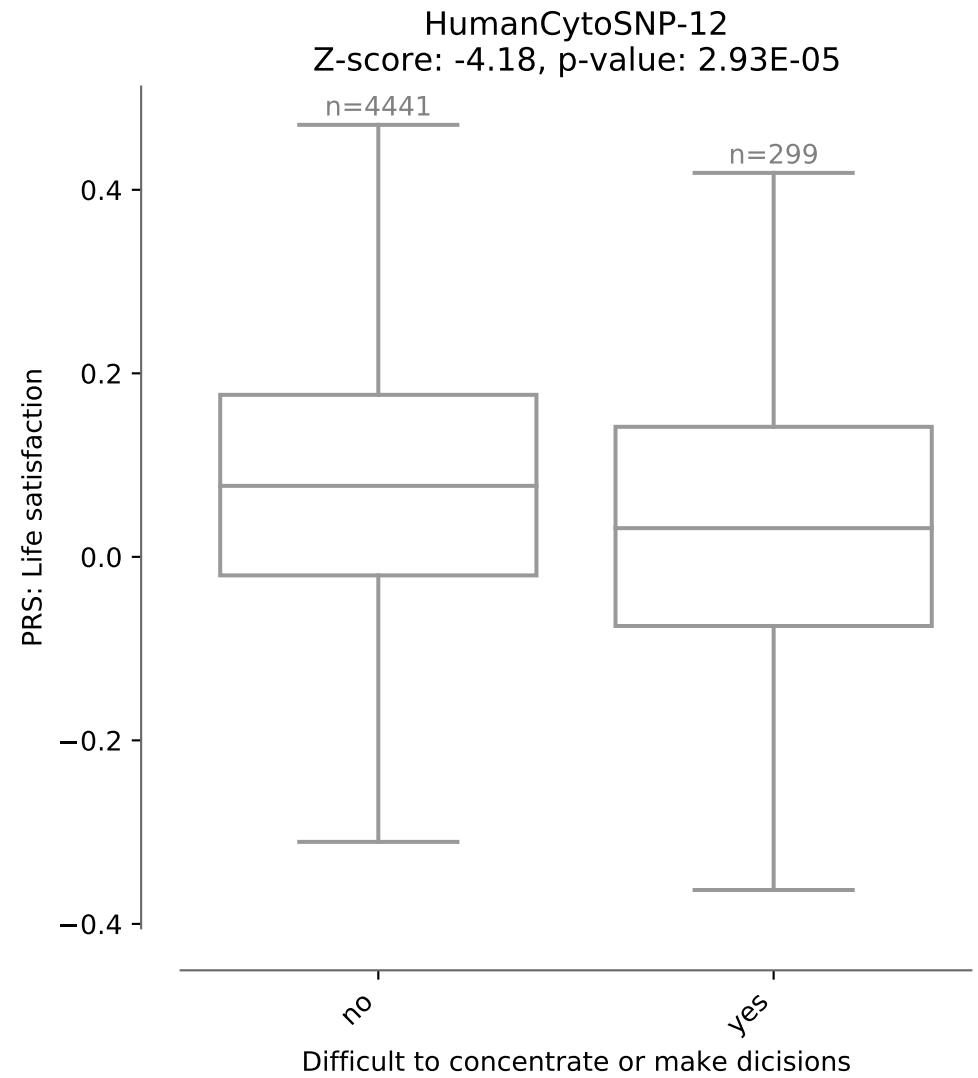

Difficult to concentrate or make decisions  
PGS: Neuroticism  
Meta analysis Z-score: 6.90, p-value: 5.17E-12

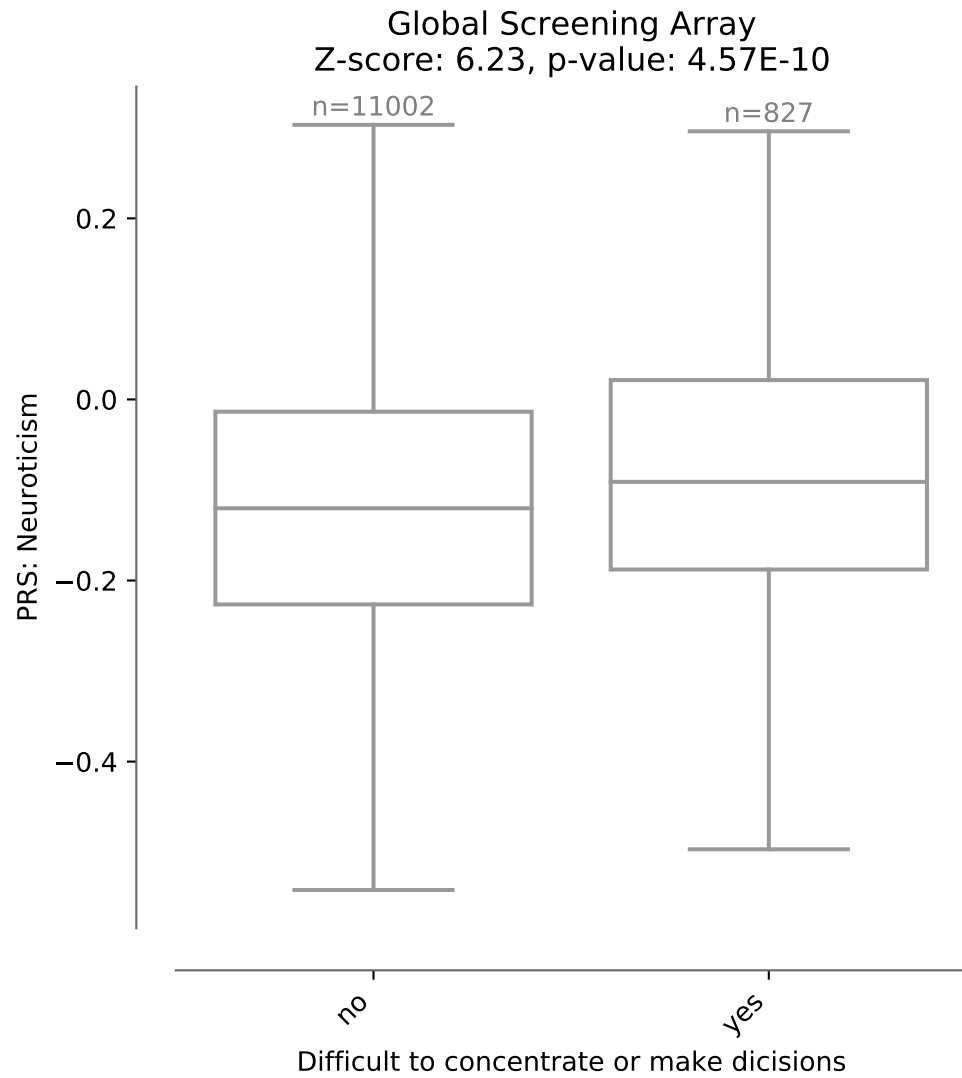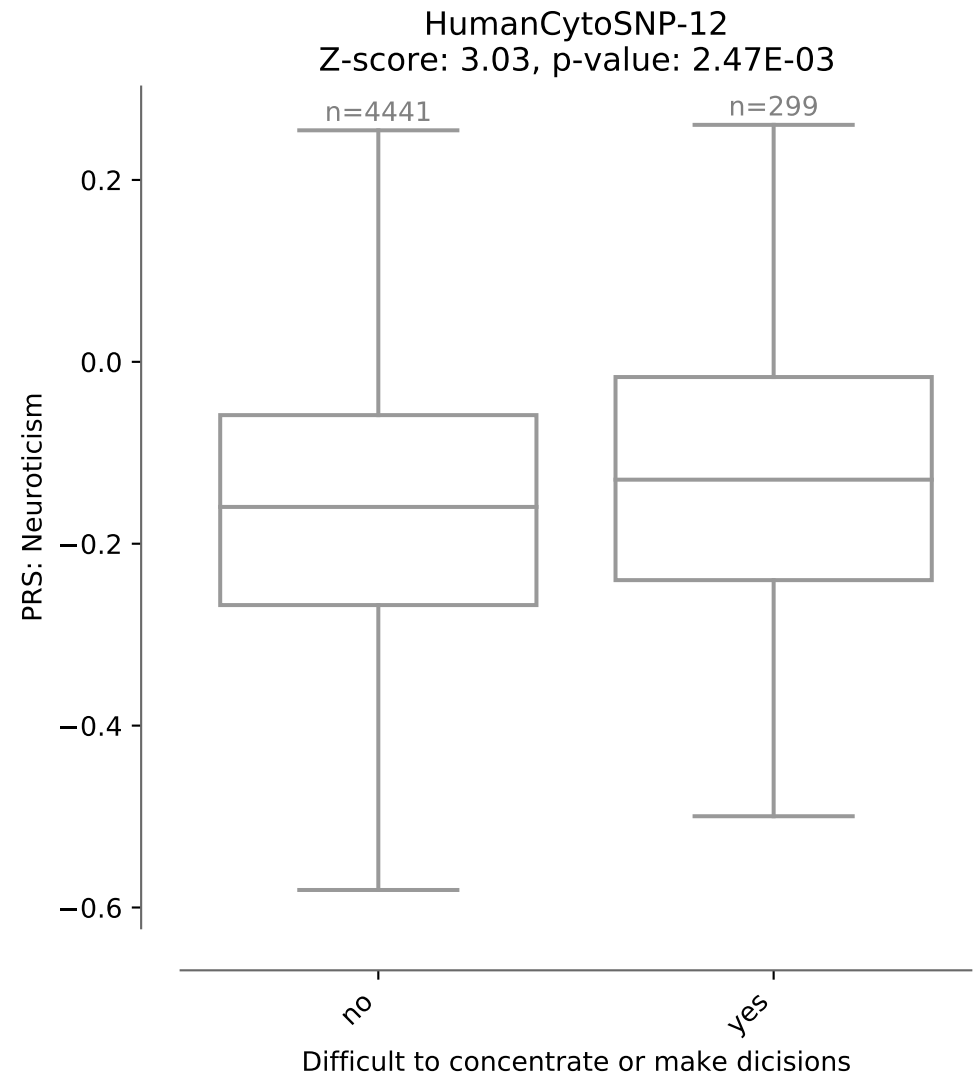

Had shortness of breath  
PGS: BMI  
Meta analysis Z-score: 4.84, p-value: 1.33E-06

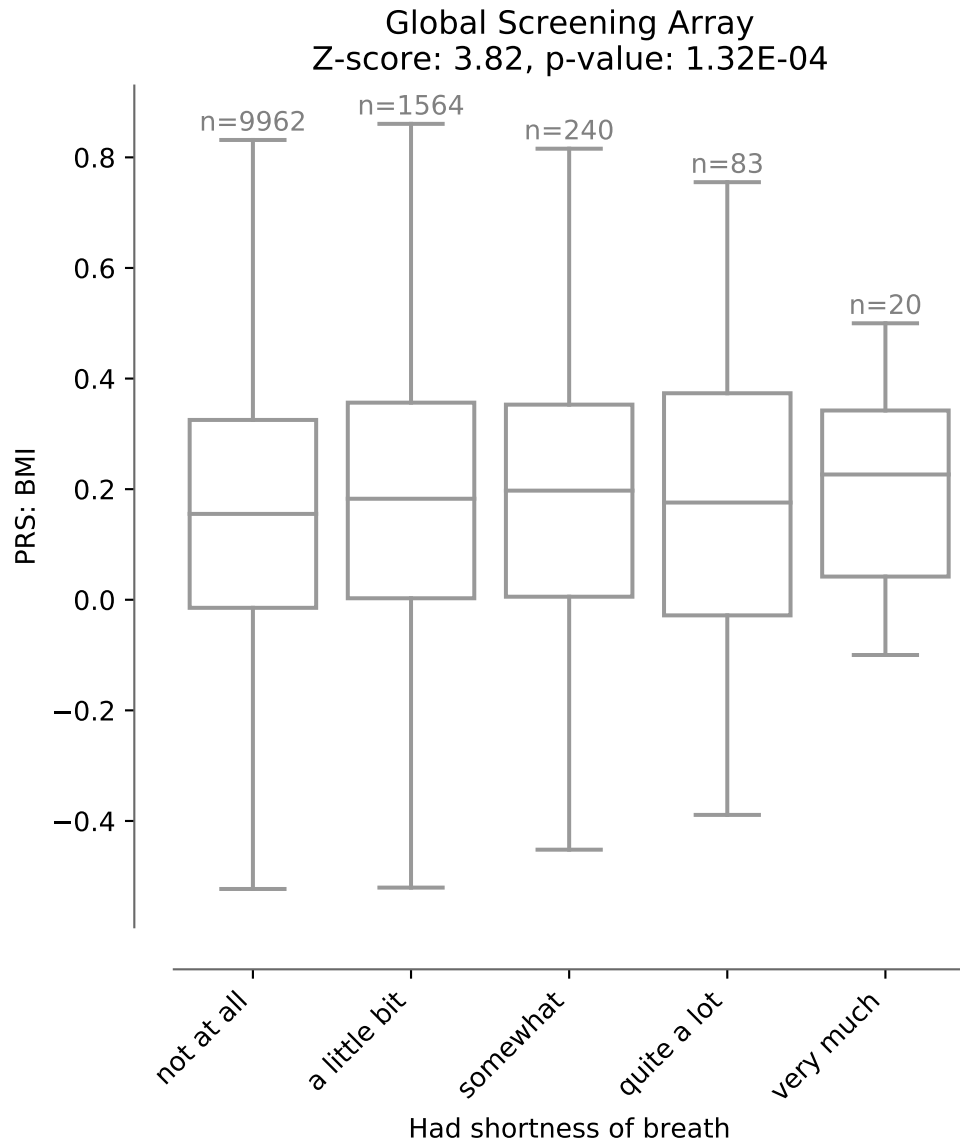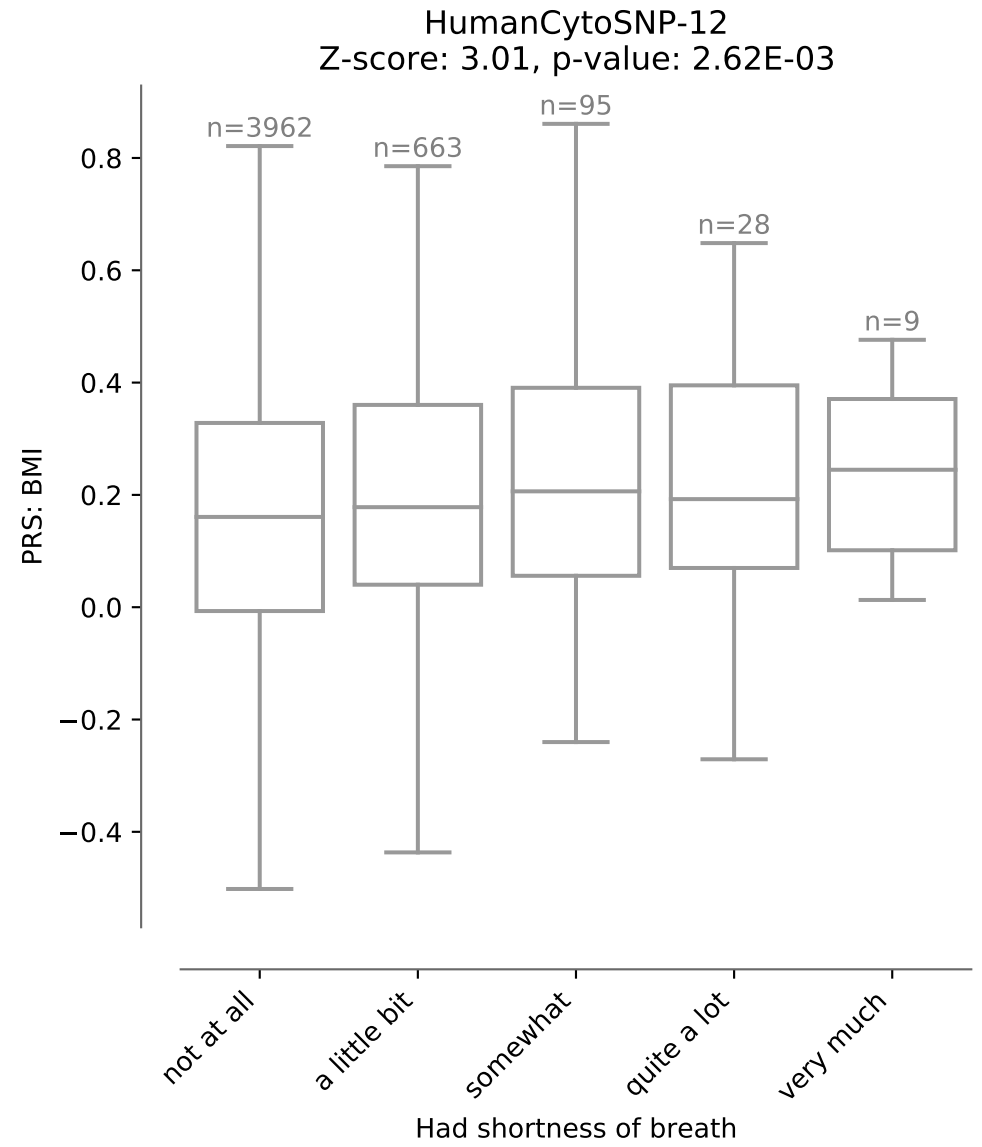

Had shortness of breath  
PGS: Tobacco use  
Meta analysis Z-score: 4.70, p-value: 2.65E-06

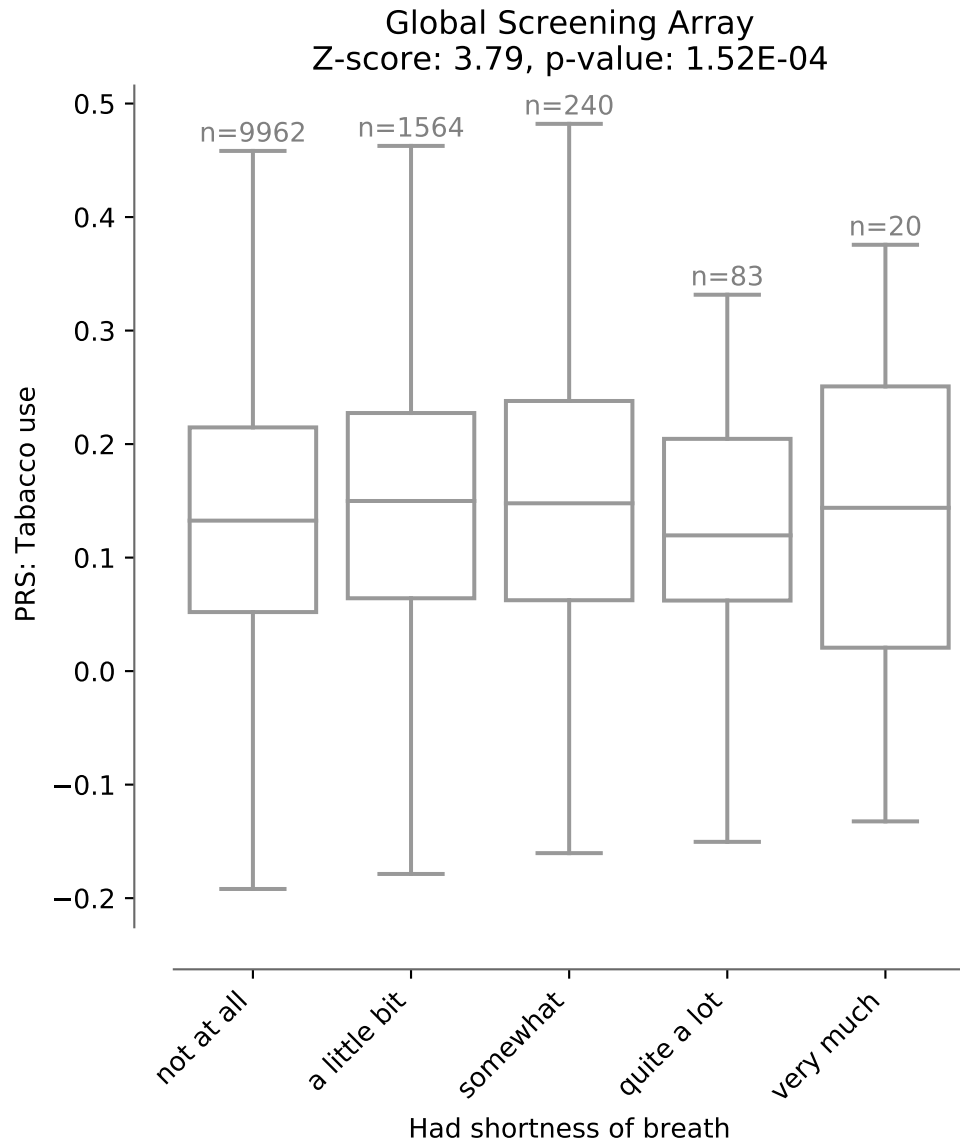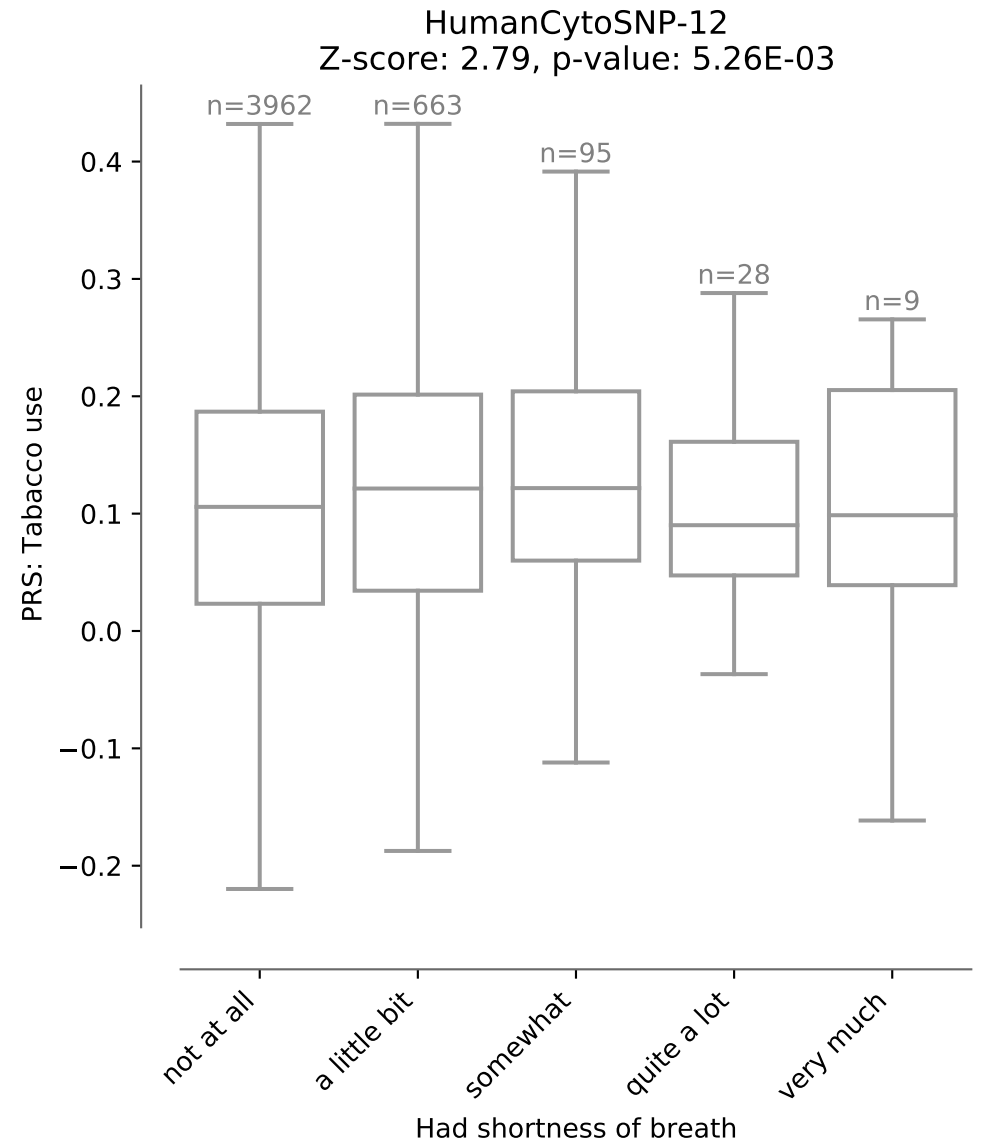

Had shortness of breath  
PGS: Educational attainment  
Meta analysis Z-score: -6.06, p-value: 1.37E-09

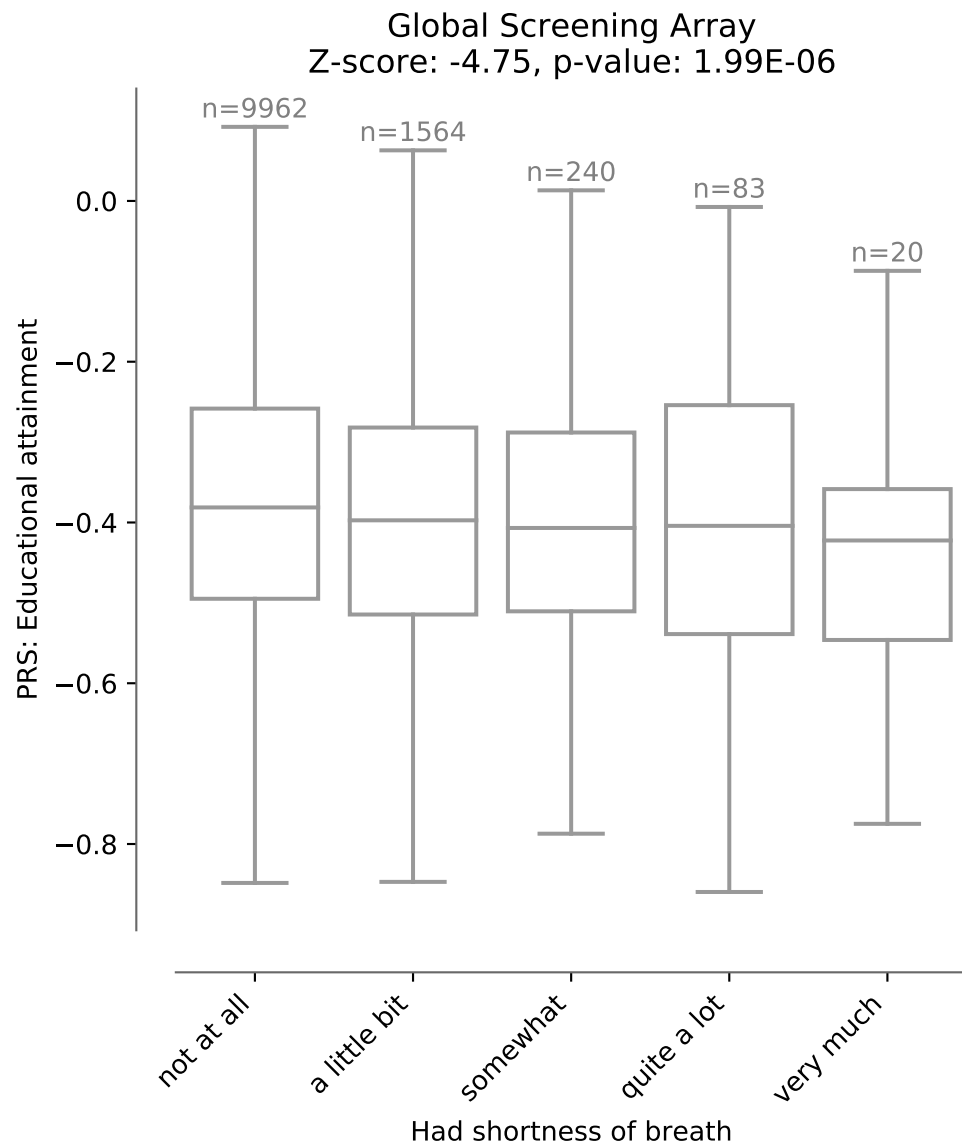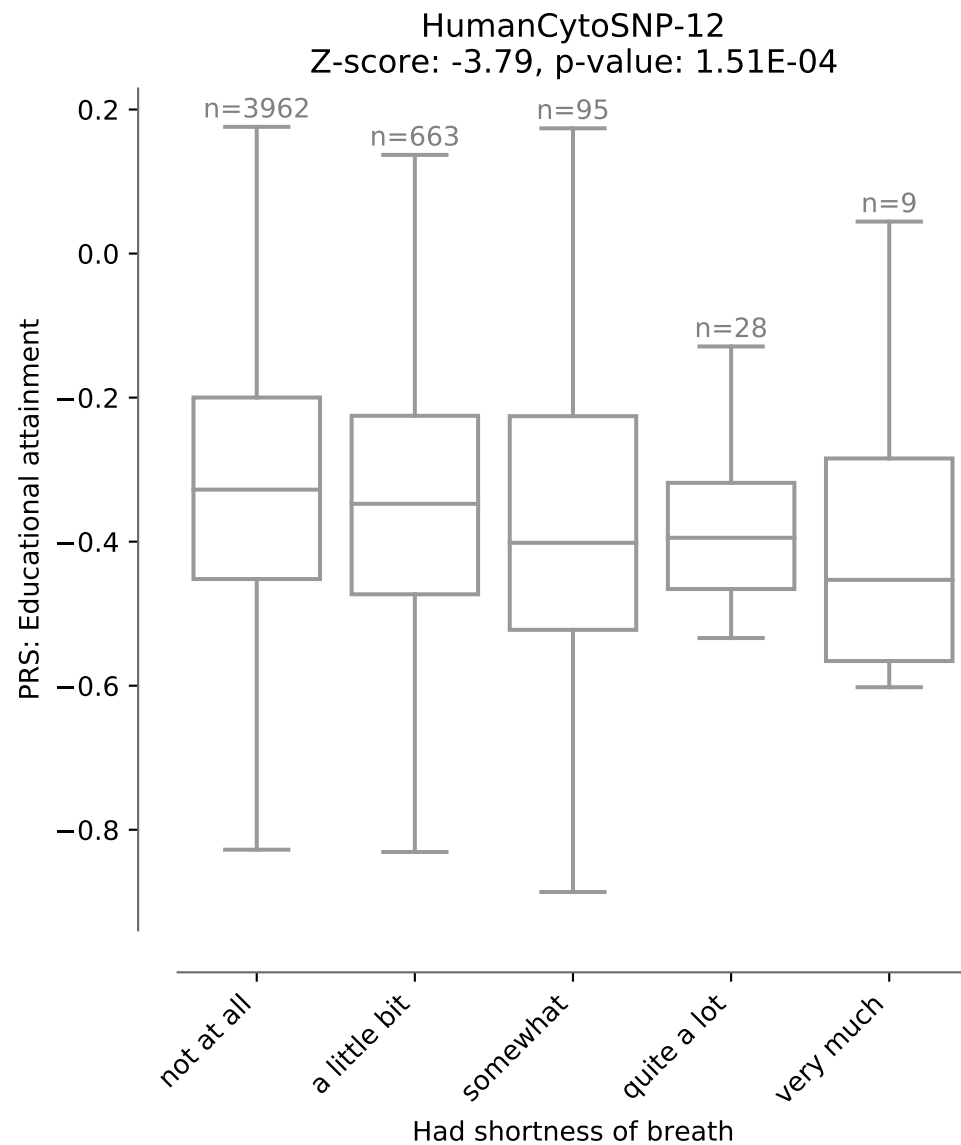

Had shortness of breath  
PGS: Life satisfaction  
Meta analysis Z-score: -4.73, p-value: 2.21E-06

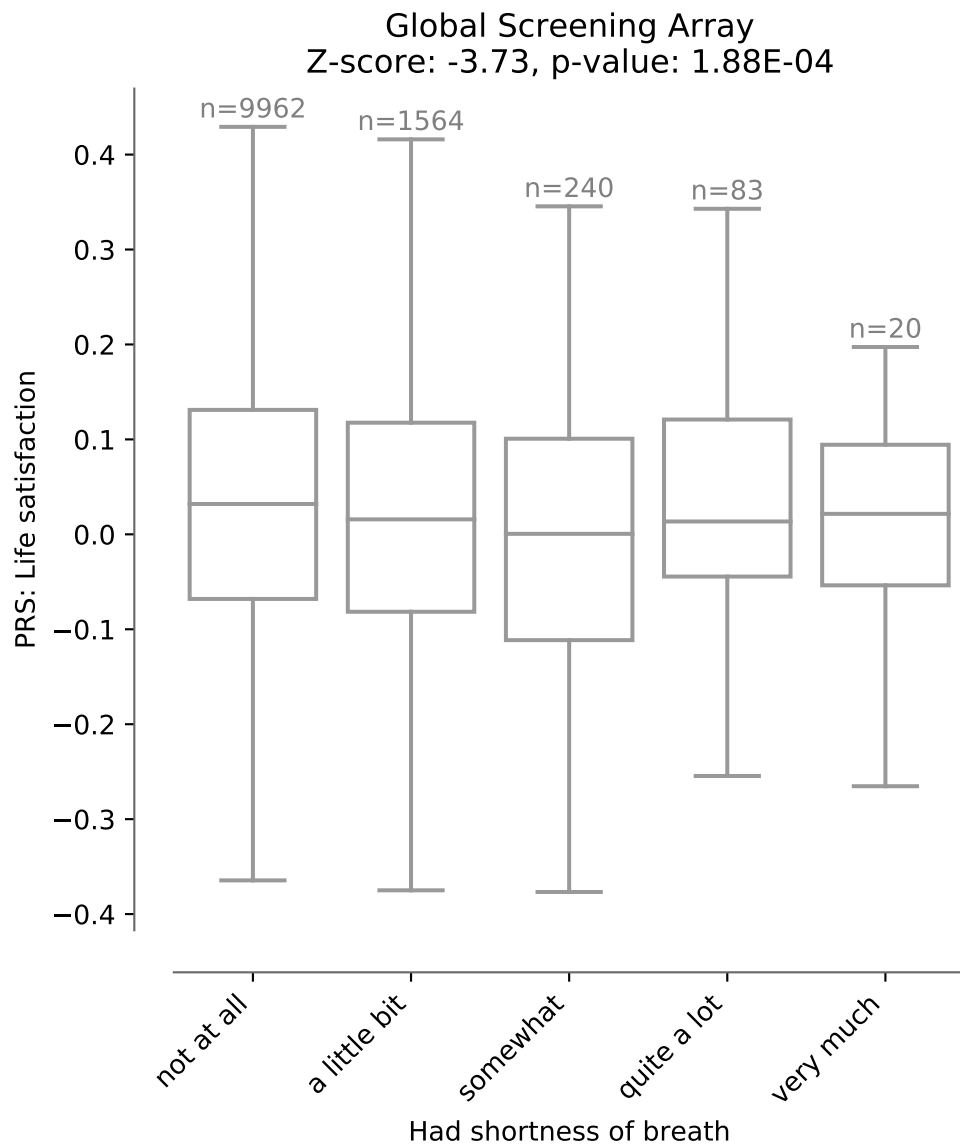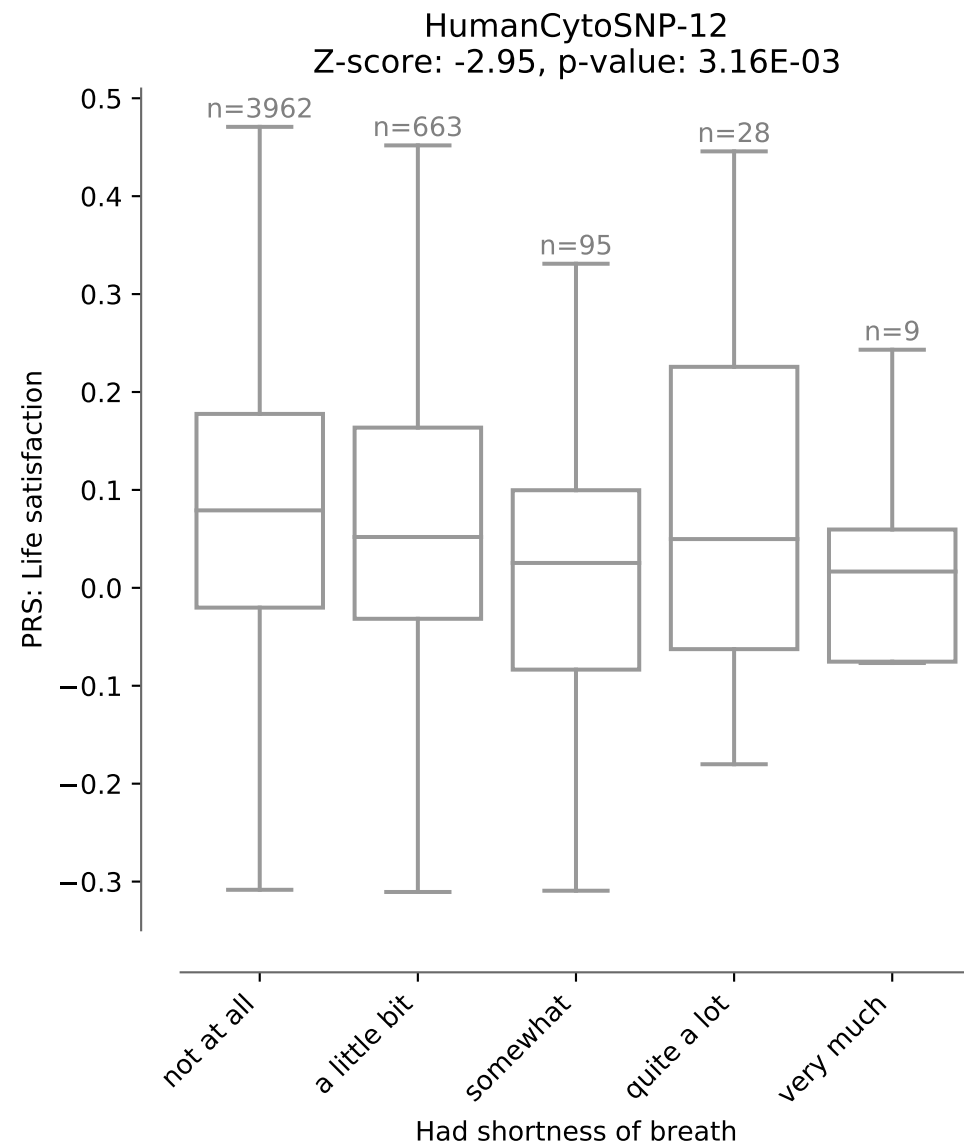

Had shortness of breath  
PGS: Neuroticism  
Meta analysis Z-score: 5.49, p-value: 4.11E-08

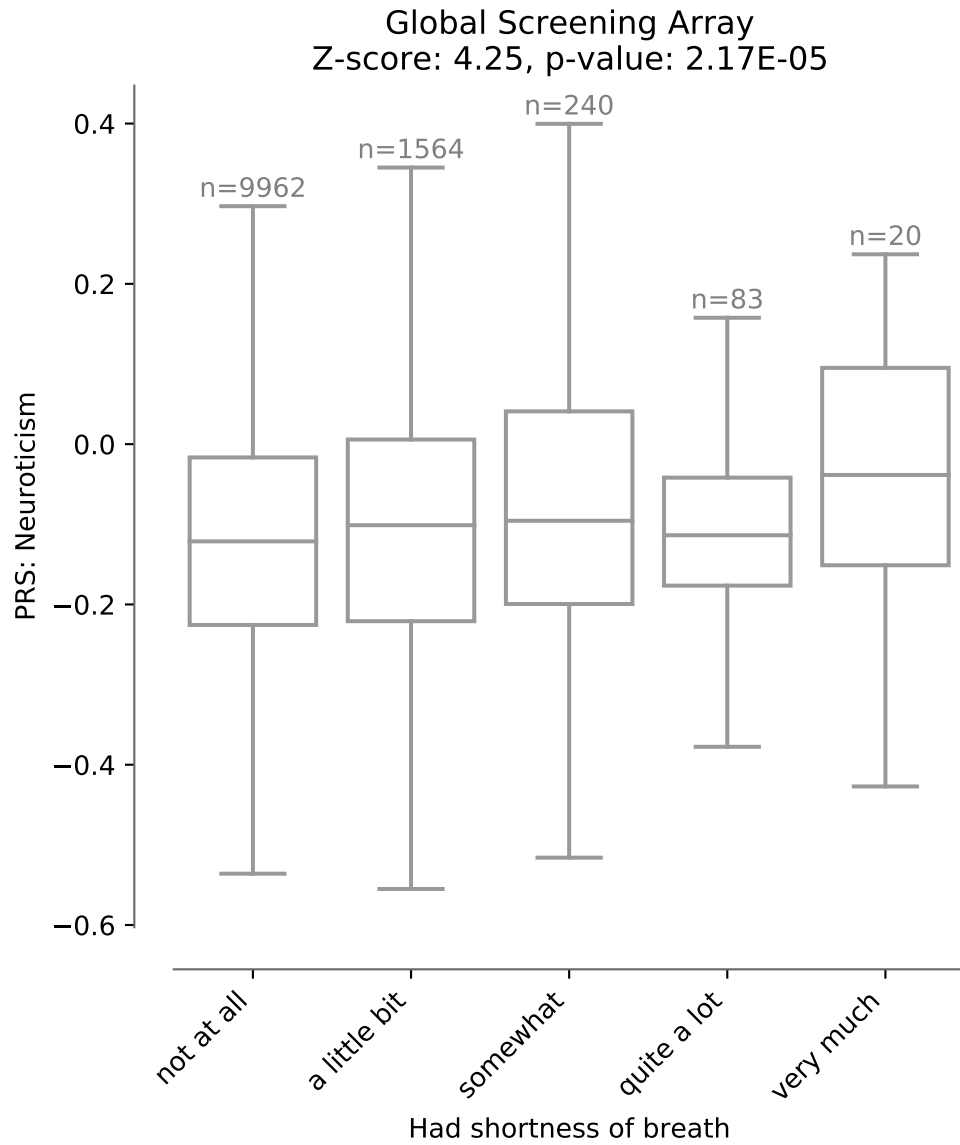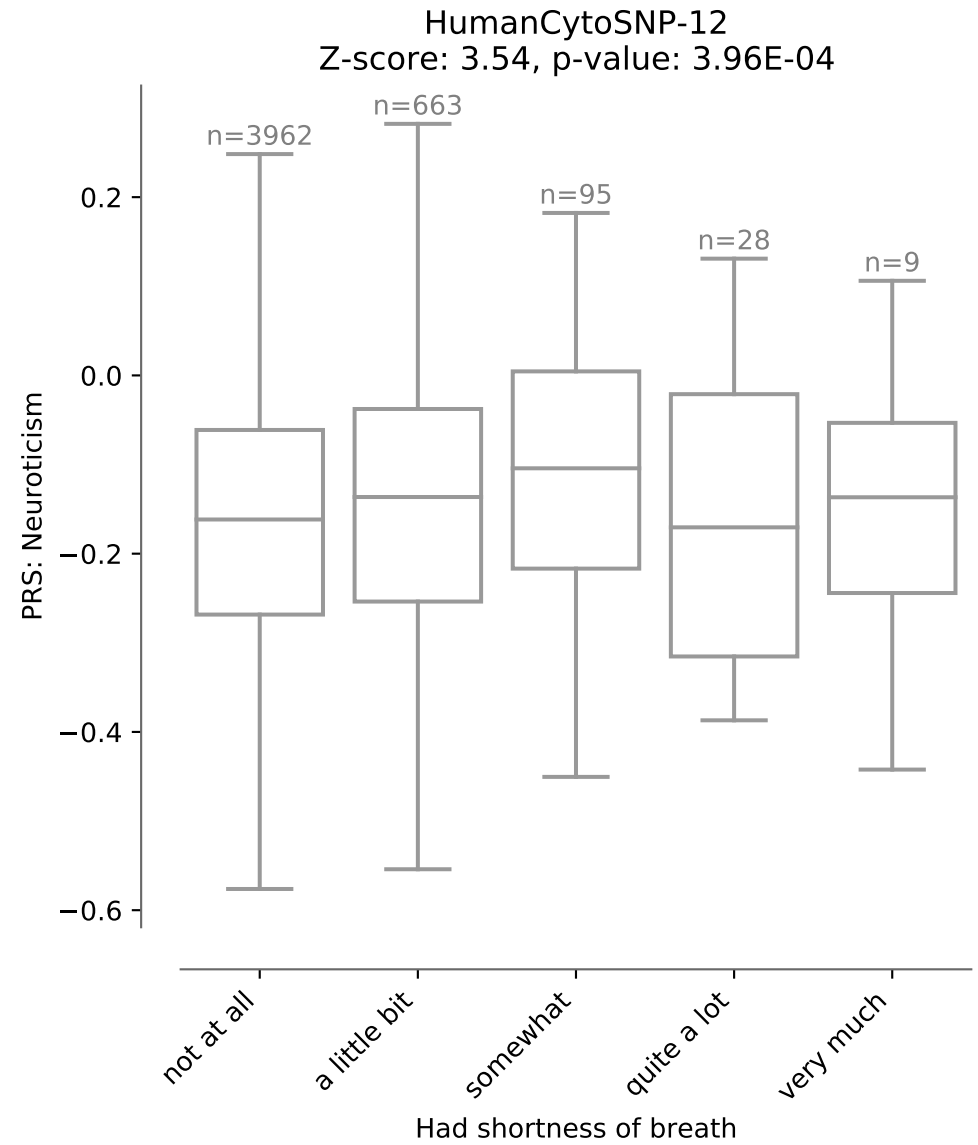



Had shortness of breath  
PGS: Schizophrenia  
Meta analysis Z-score: 4.45, p-value: 8.54E-06

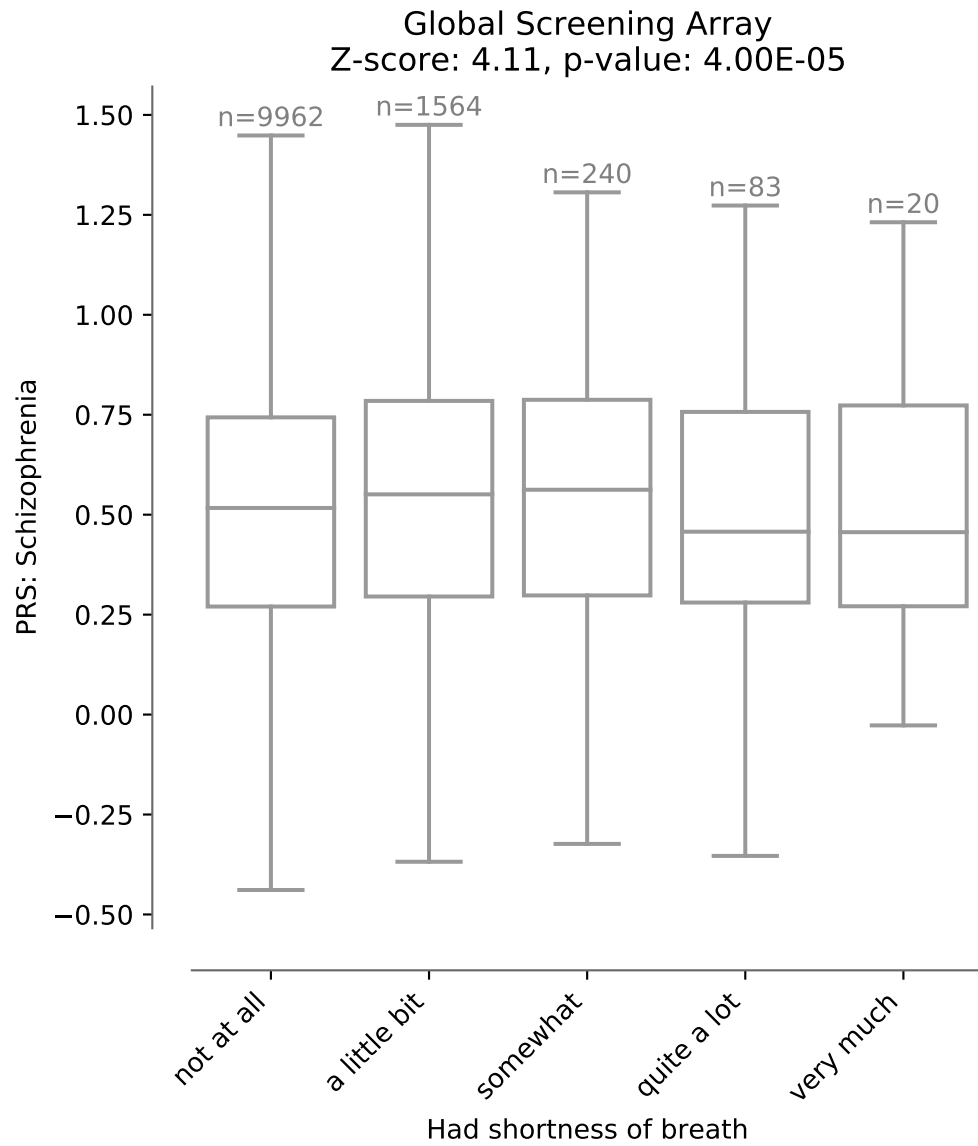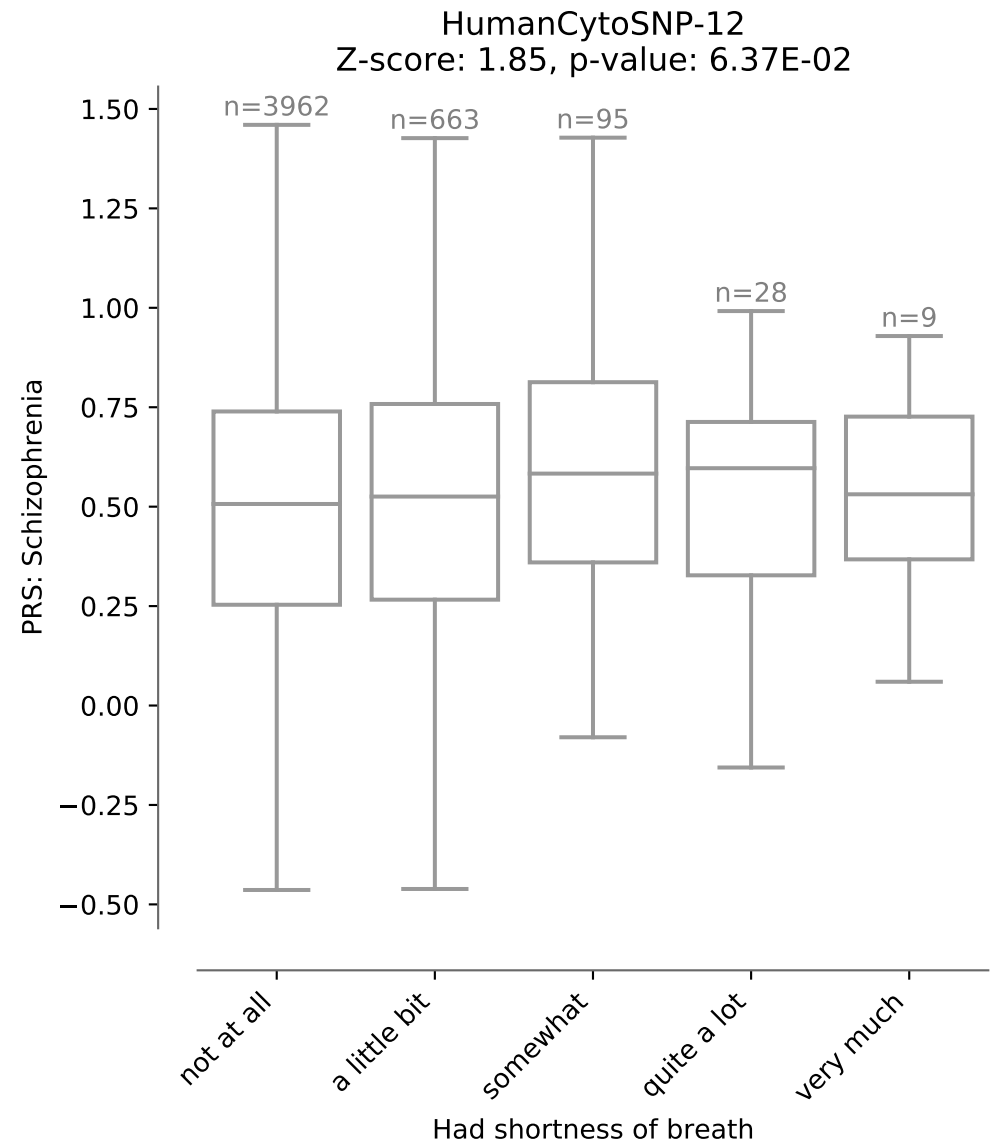

Felt physically exhausted  
PGS: Depression  
Meta analysis Z-score: 5.67, p-value: 1.42E-08

Global Screening Array  
Z-score: 4.24, p-value: 2.19E-05

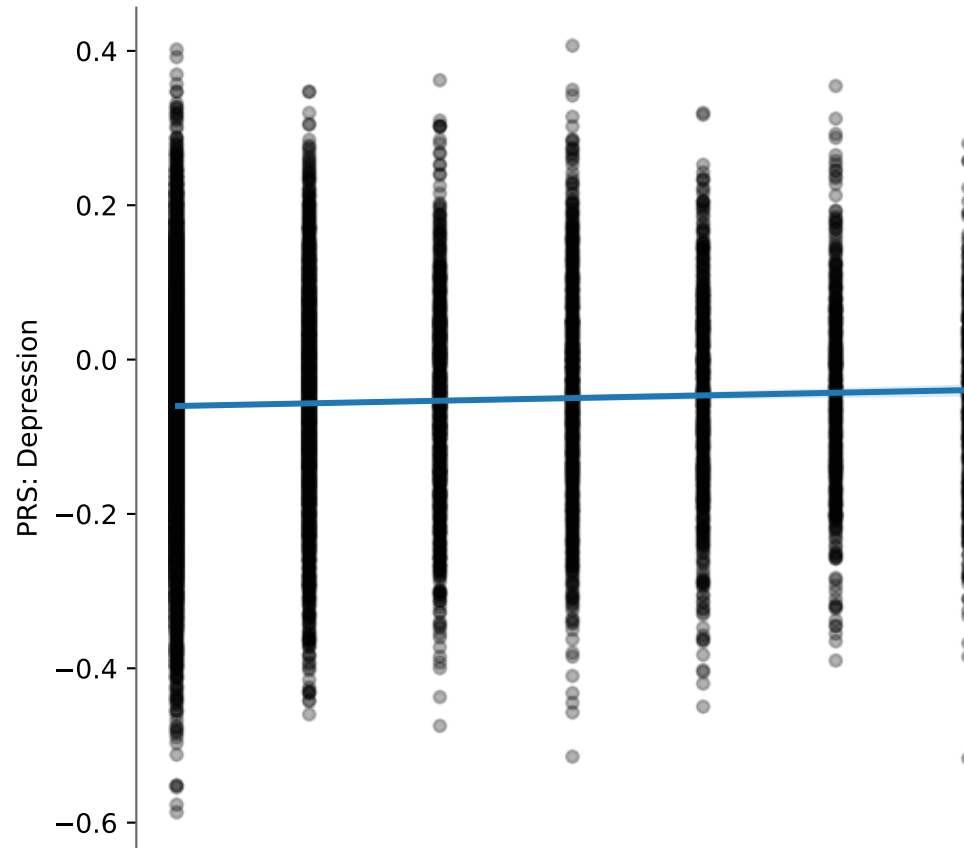

1 (no, that is not true)

2

3

4

5

6

7 (yes, that is true)

Felt physically exhausted

HumanCytoSNP-12  
Z-score: 3.89, p-value: 9.84E-05

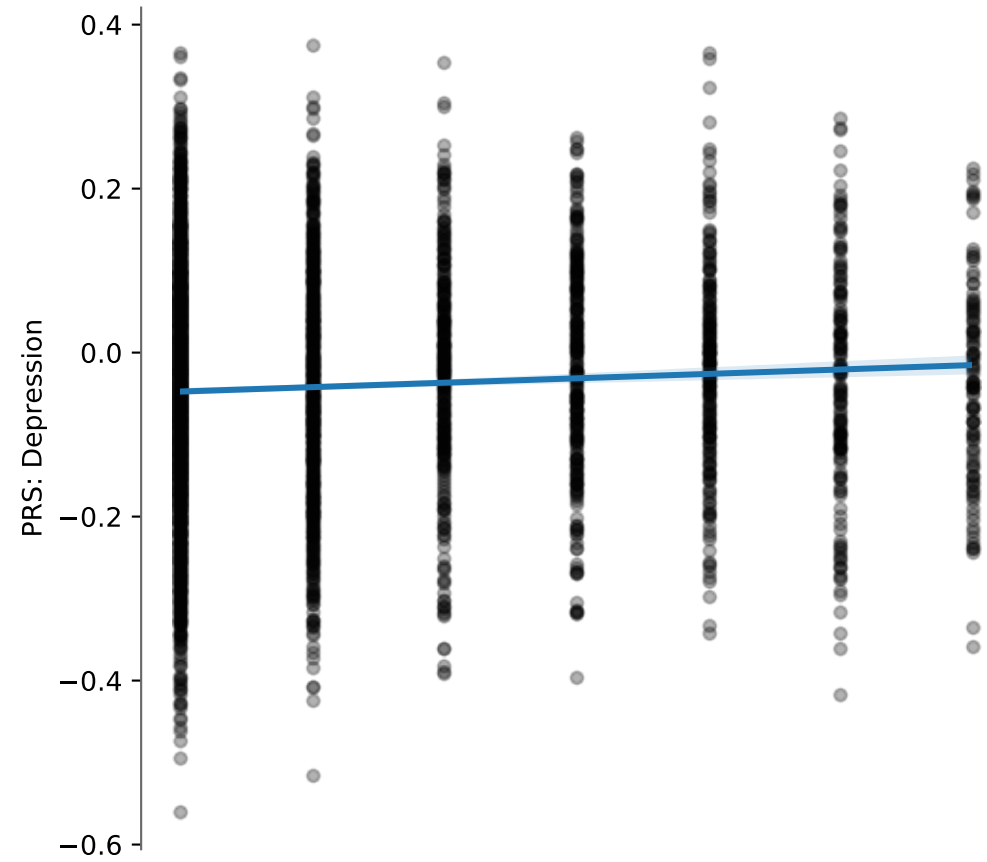

1 (no, that is not true)

2

3

4

5

6

7 (yes, that is true)

Felt physically exhausted

Felt physically exhausted  
PGS: Life satisfaction  
Meta analysis Z-score: -8.78, p-value: 1.60E-18

Global Screening Array  
Z-score: -7.12, p-value: 1.08E-12

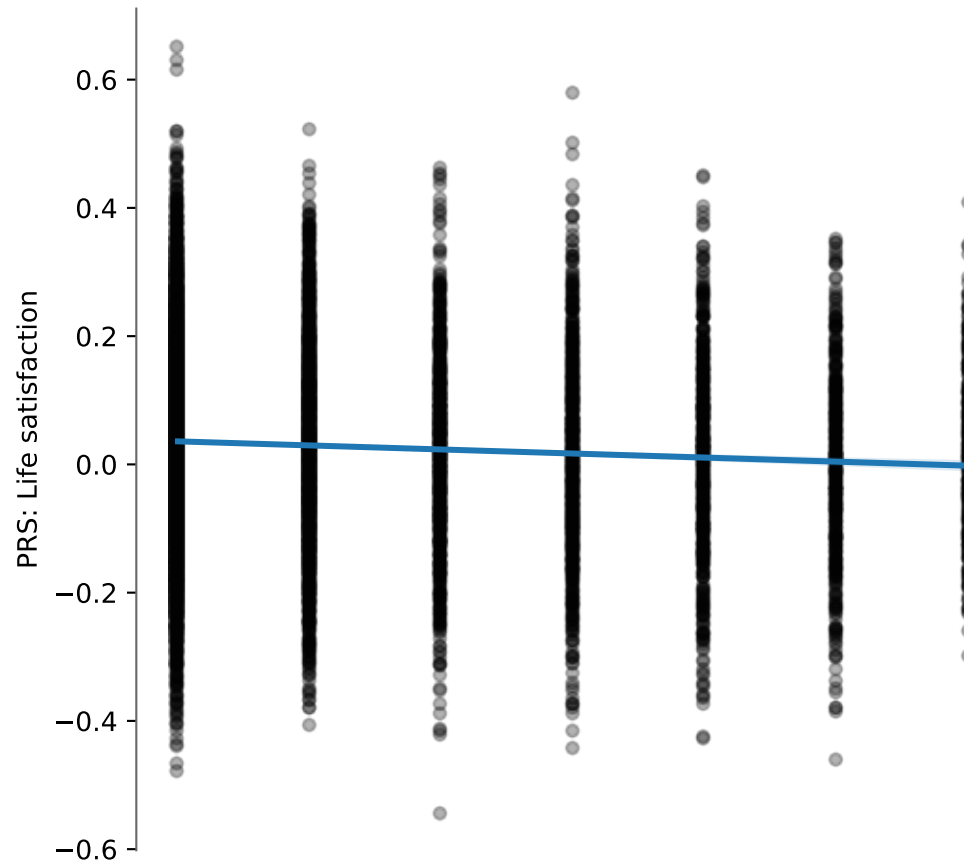

1 (no, that is not true)

2

3

4

5

6

7 (yes, that is true)

Felt physically exhausted

HumanCytoSNP-12  
Z-score: -5.15, p-value: 2.55E-07

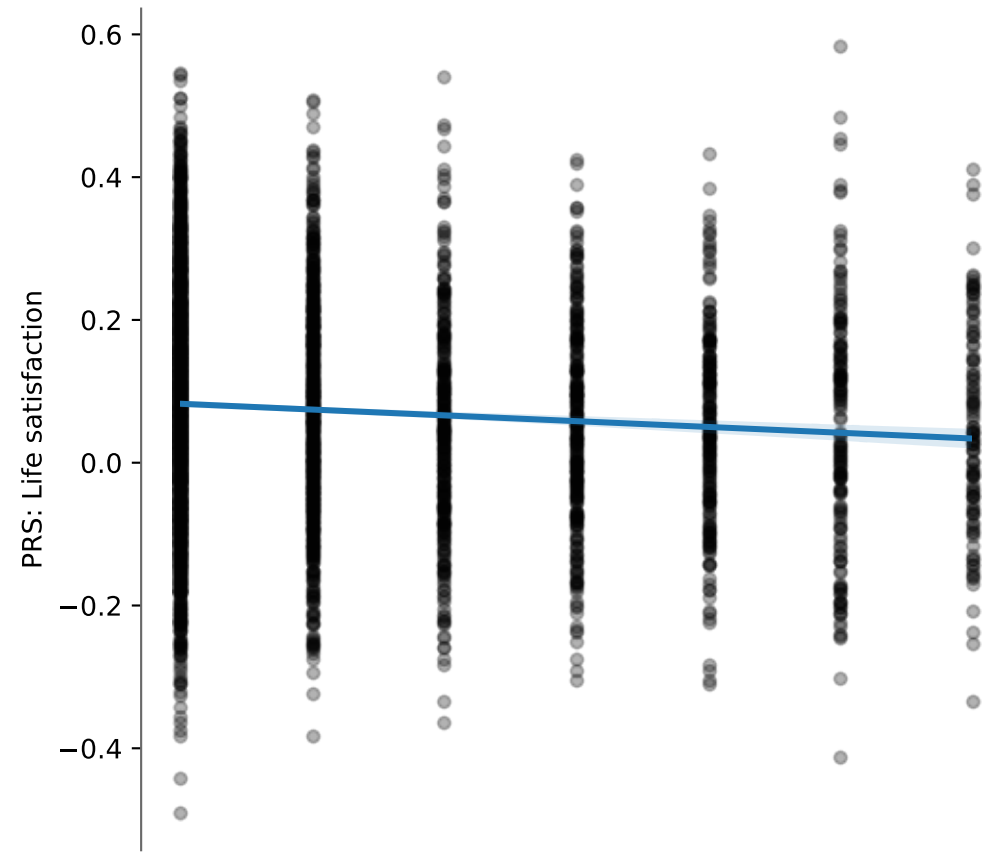

1 (no, that is not true)

2

3

4

5

6

7 (yes, that is true)

Felt physically exhausted

Felt physically exhausted  
PGS: Neuroticism  
Meta analysis Z-score: 7.00, p-value: 2.59E-12

Global Screening Array  
Z-score: 5.66, p-value: 1.52E-08

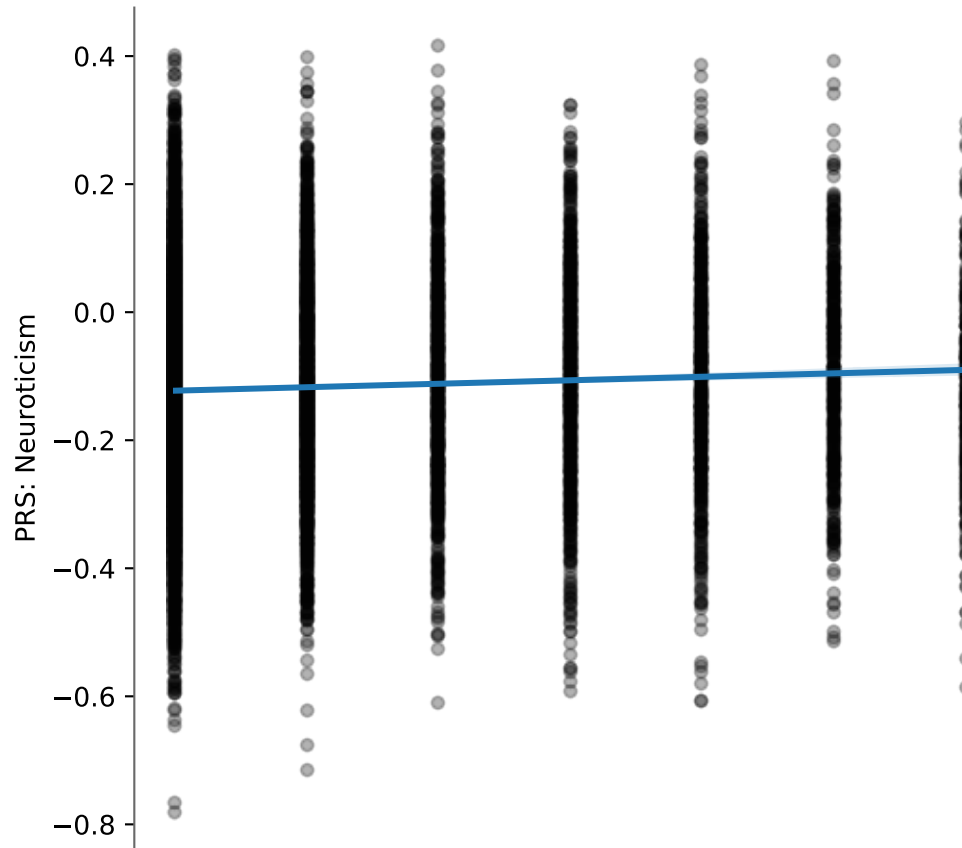

Felt physically exhausted

HumanCytoSNP-12  
Z-score: 4.14, p-value: 3.54E-05

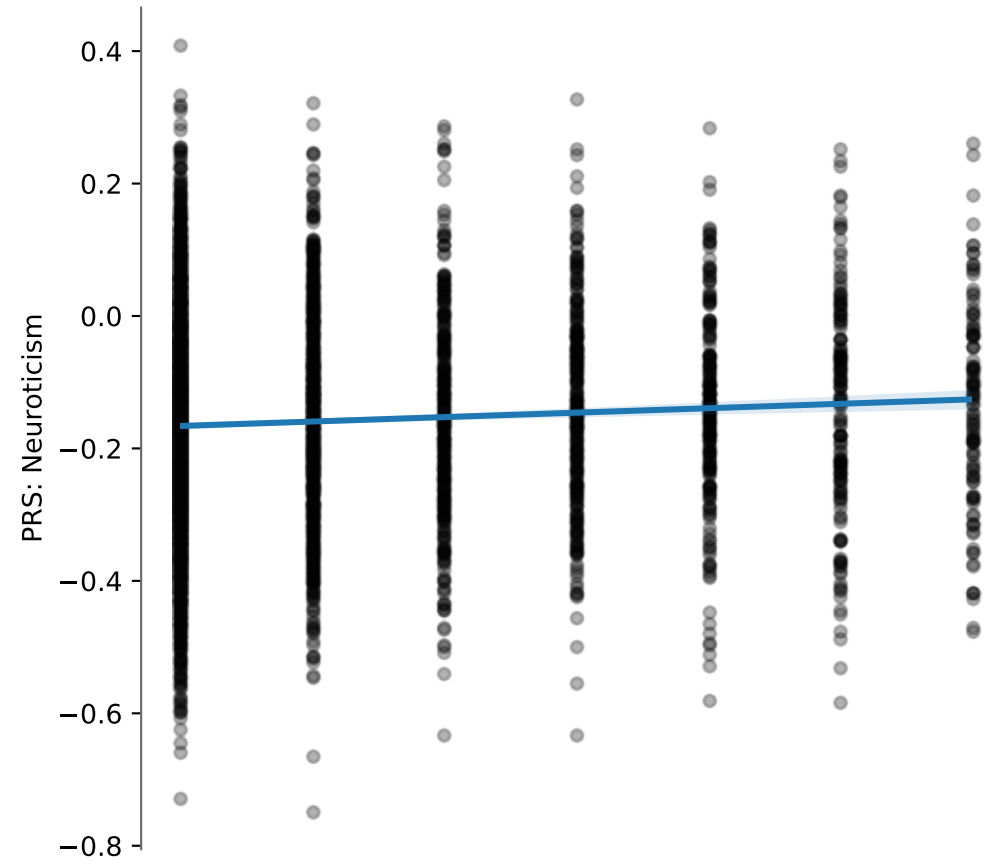

Felt physically exhausted

1 (no, that is not true)

2

3

4

5

6

7 (yes, that is true)

1 (no, that is not true)

2

3

4

5

6

7 (yes, that is true)

Felt physically exhausted  
PGS: Schizophrenia  
Meta analysis Z-score: 5.48, p-value: 4.16E-08

Global Screening Array  
Z-score: 4.38, p-value: 1.21E-05

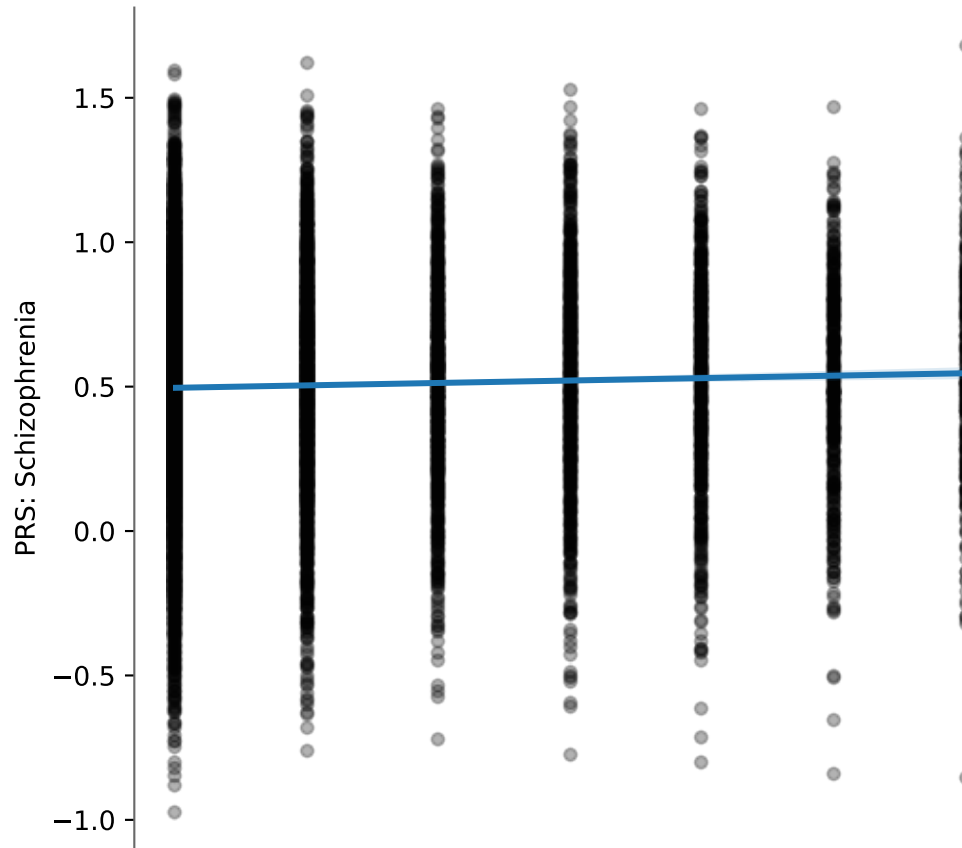

1 (no, that is not true)

2

3

4

5

6

7 (yes, that is true)

Felt physically exhausted

HumanCytoSNP-12  
Z-score: 3.33, p-value: 8.75E-04

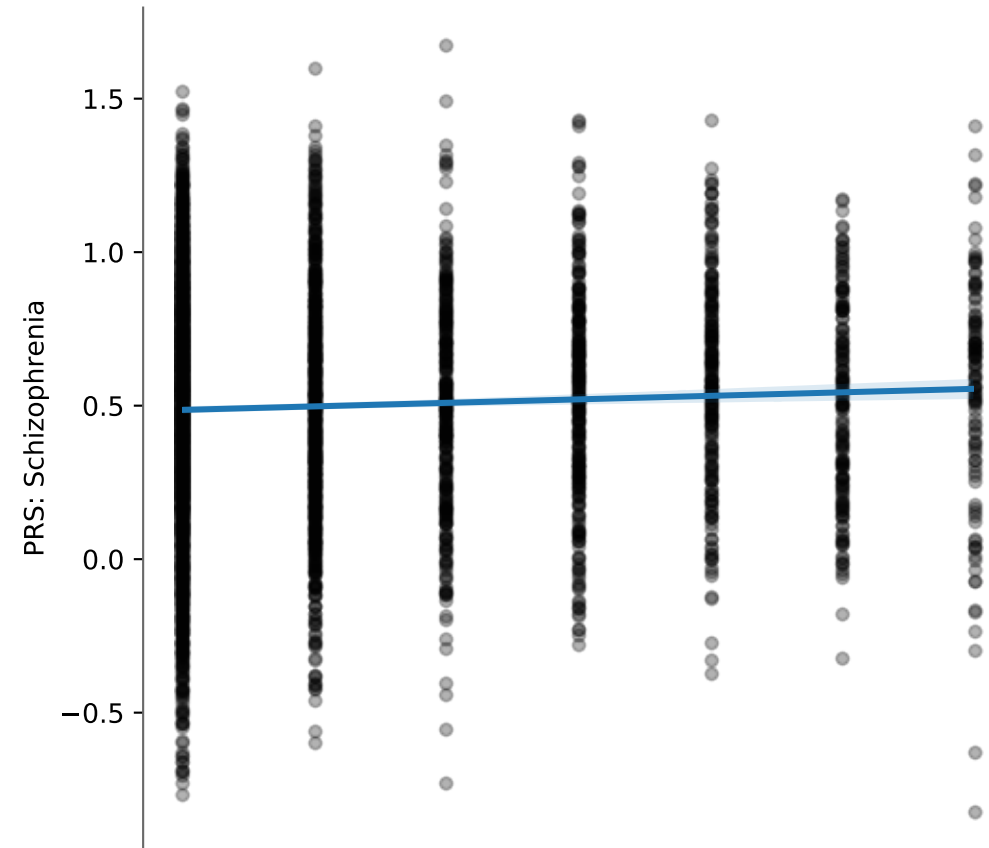

1 (no, that is not true)

2

3

4

5

6

7 (yes, that is true)

Felt physically exhausted

Complying with the measure of not visiting anyone in a high risk group

PGS: Educational attainment

Meta analysis Z-score: -4.99, p-value: 6.16E-07

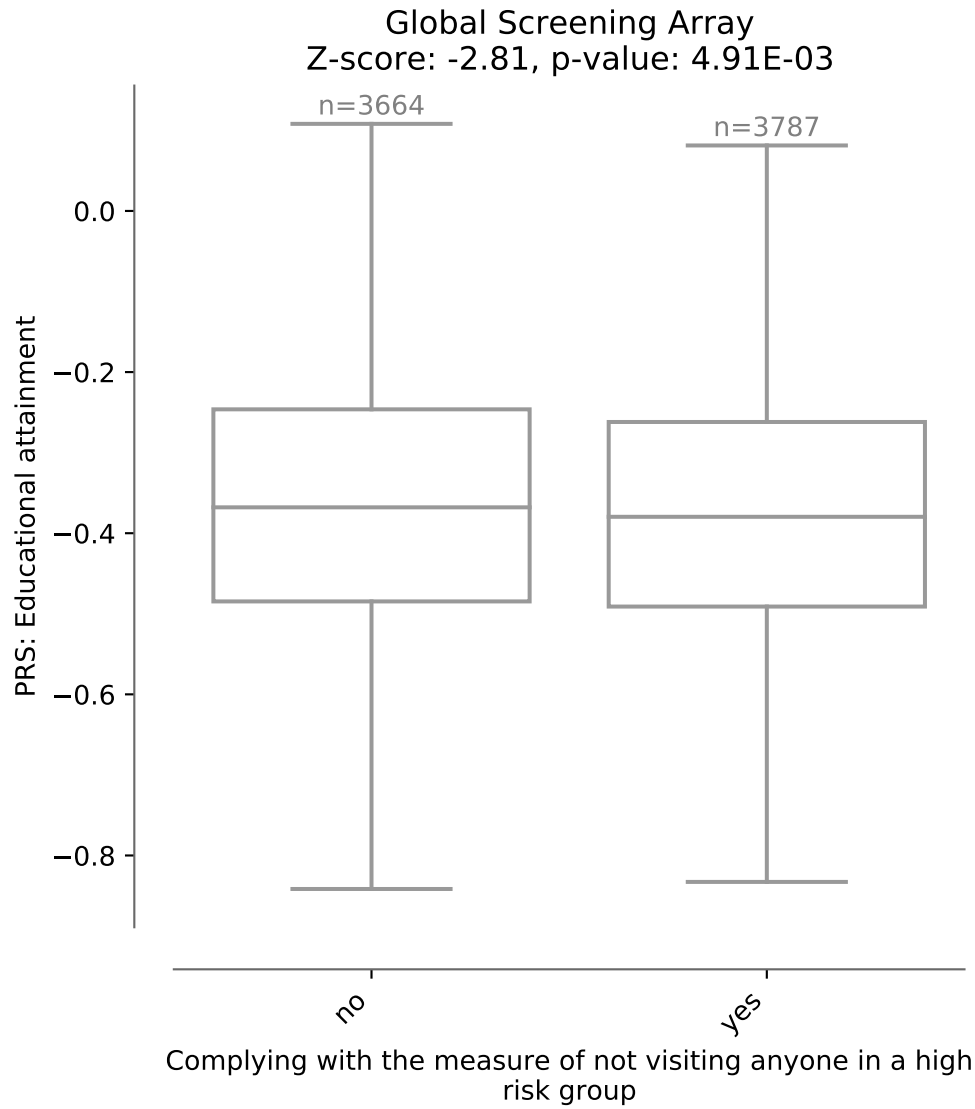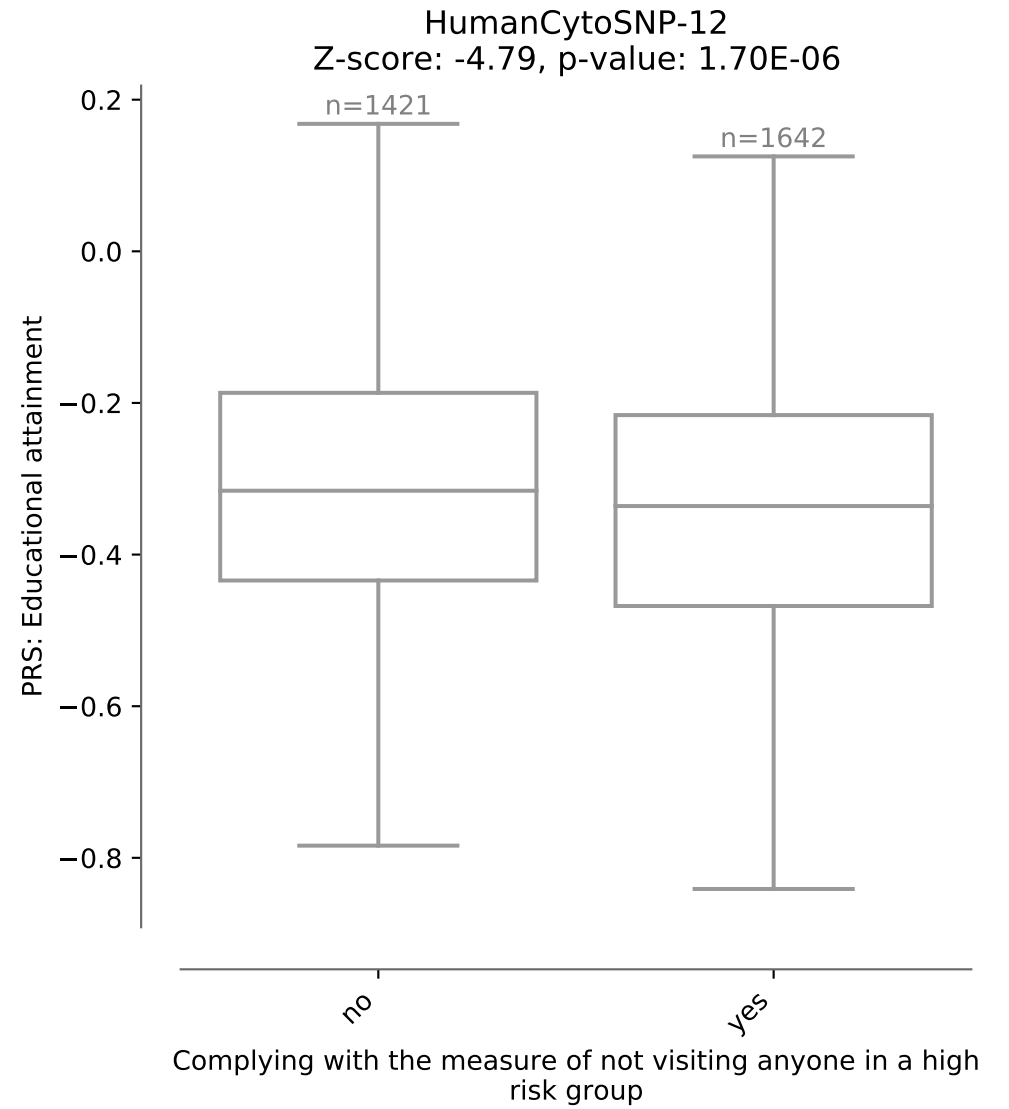

Had nausea or upset stomach  
PGS: Life satisfaction  
Meta analysis Z-score: -6.23, p-value: 4.53E-10

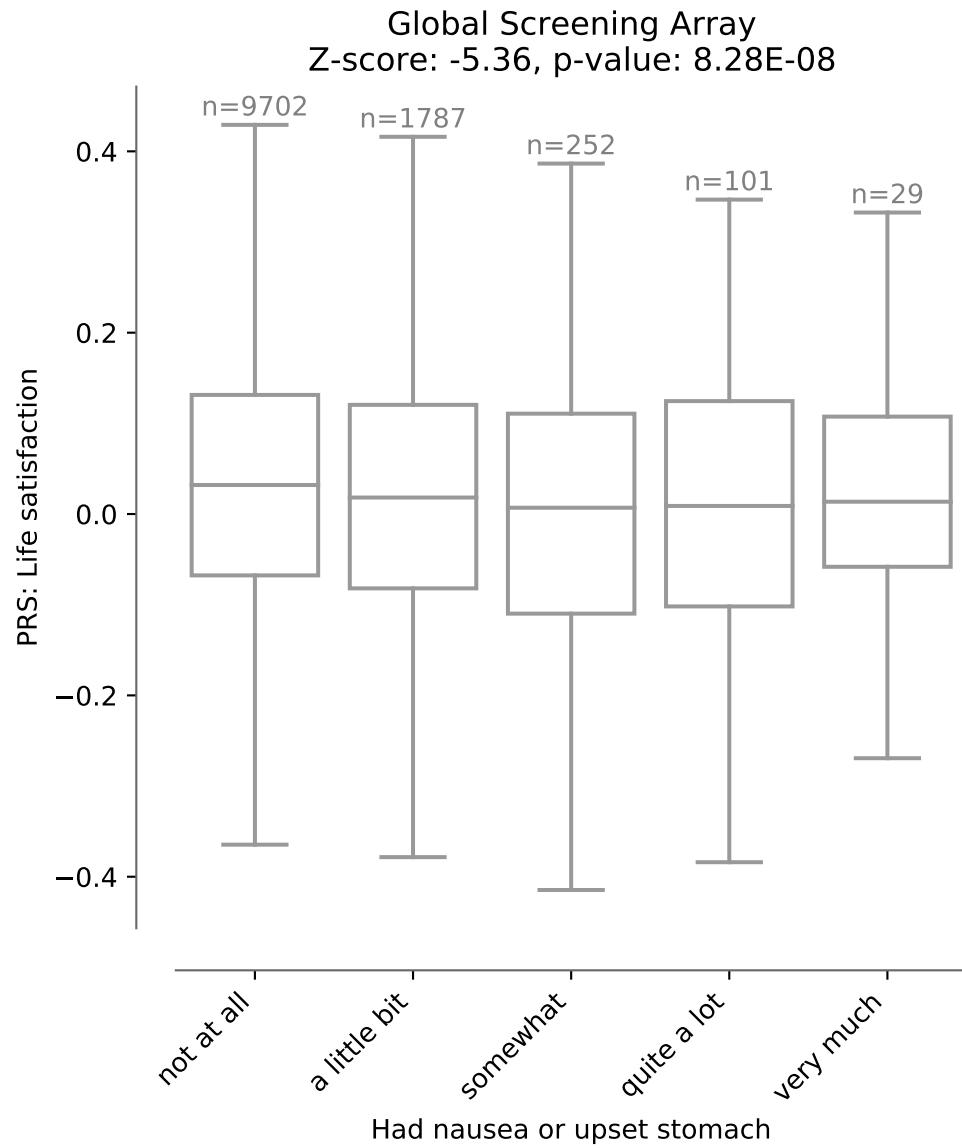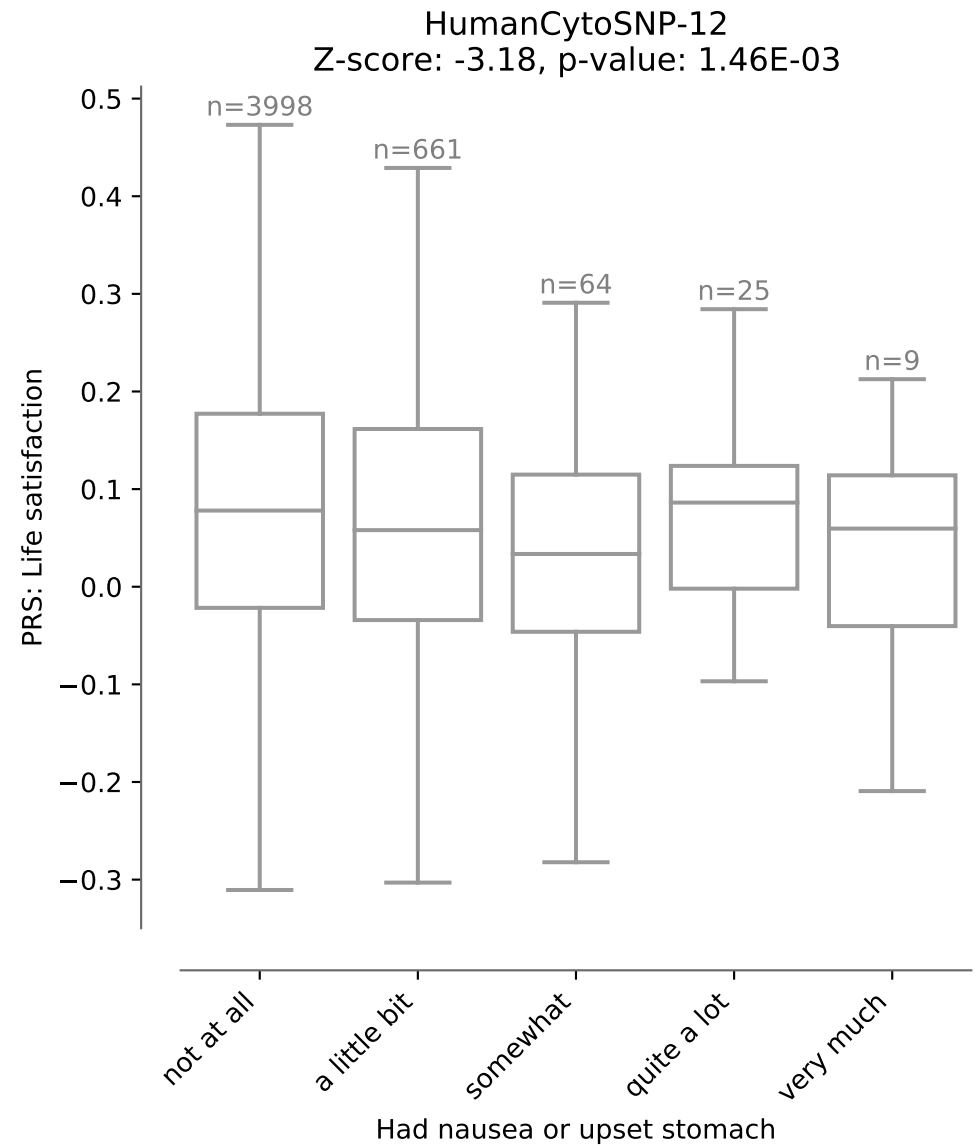

Had nausea or upset stomach  
PGS: Neuroticism  
Meta analysis Z-score: 4.74, p-value: 2.17E-06

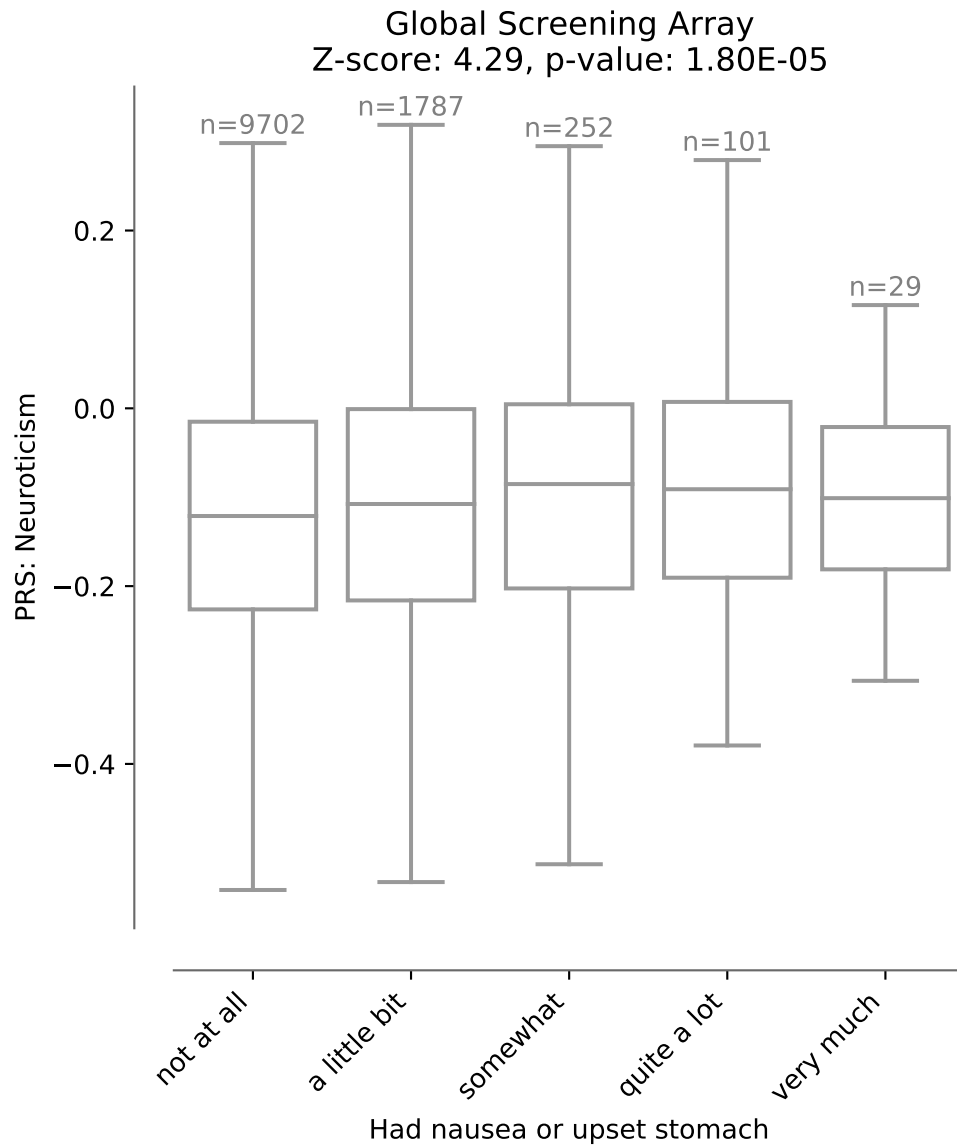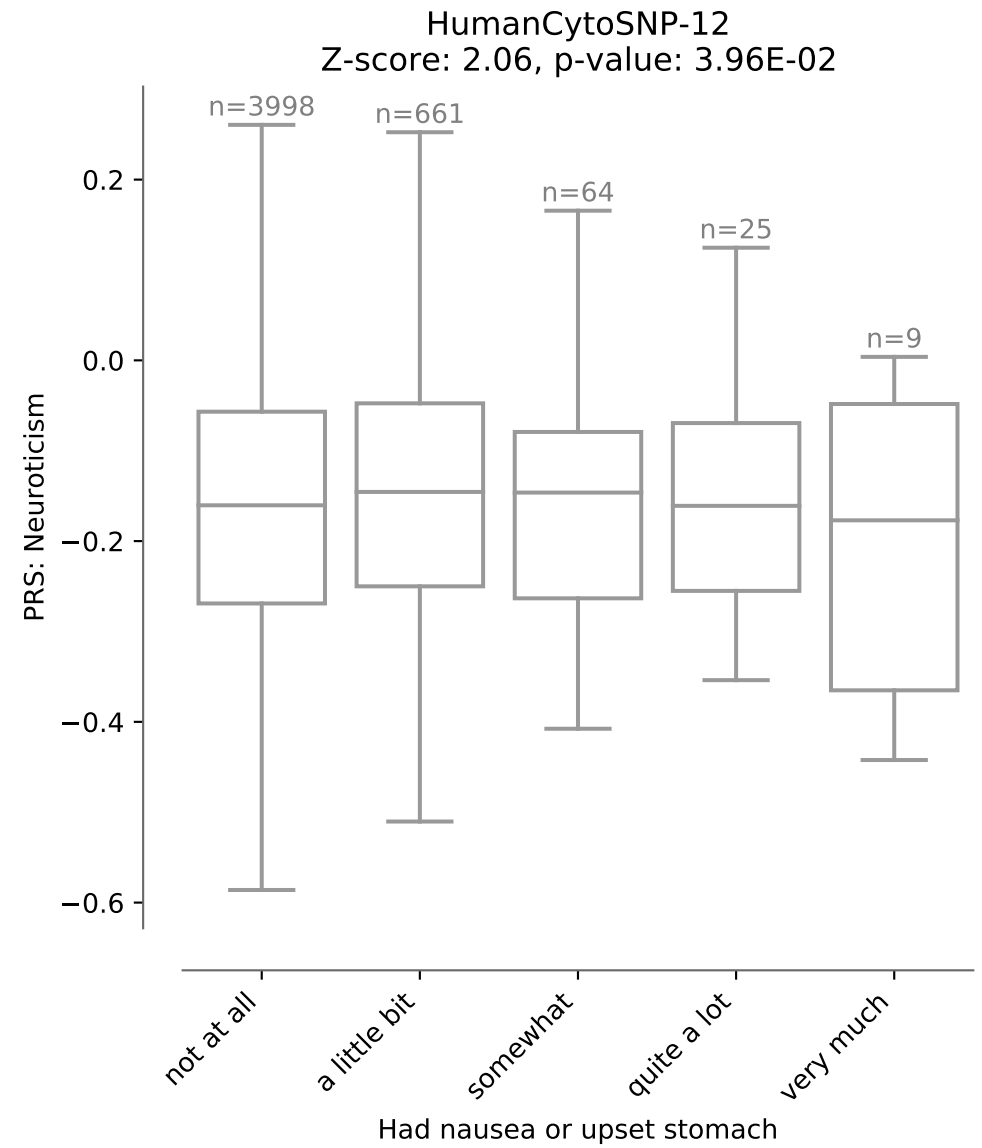



Had difficulty breathing  
PGS: Educational attainment  
Meta analysis Z-score: -4.70, p-value: 2.67E-06

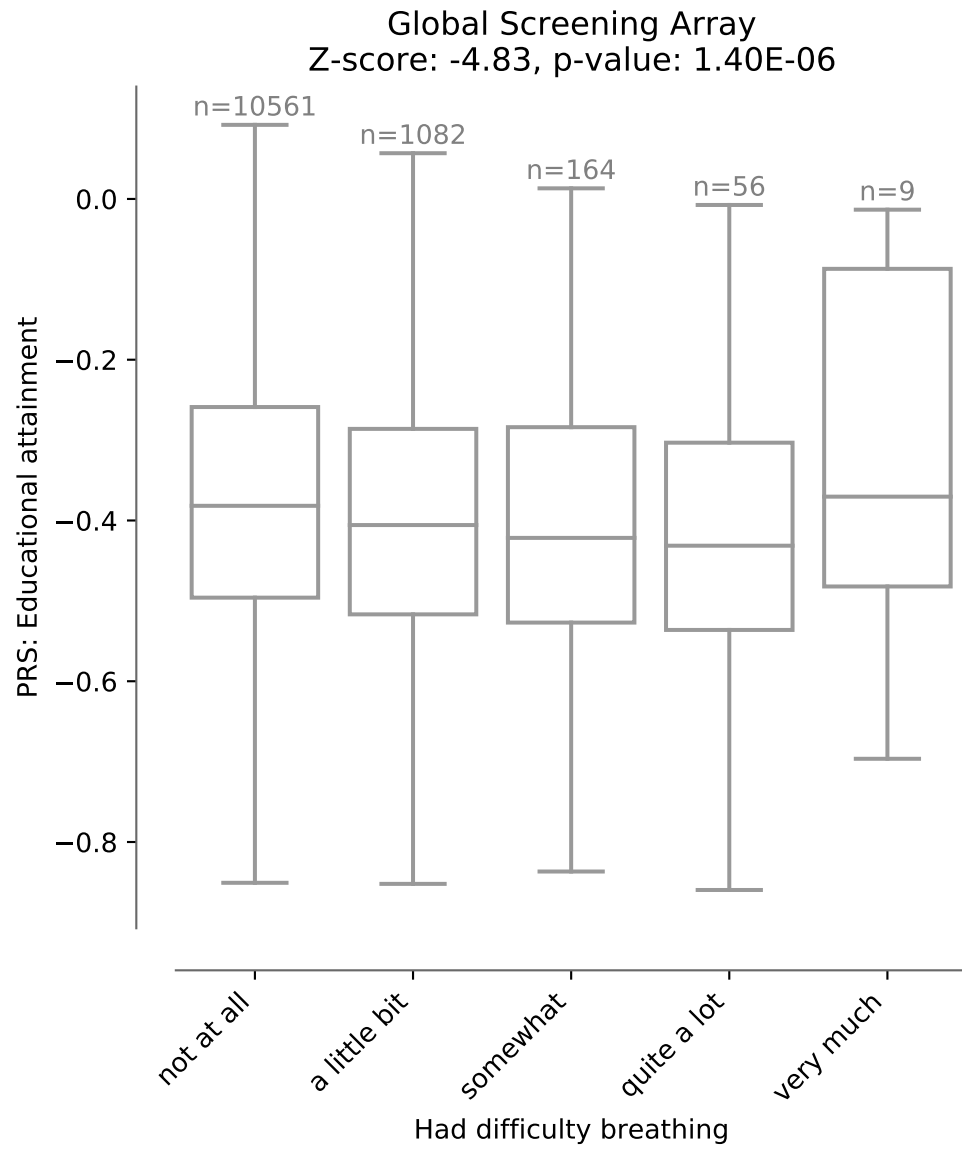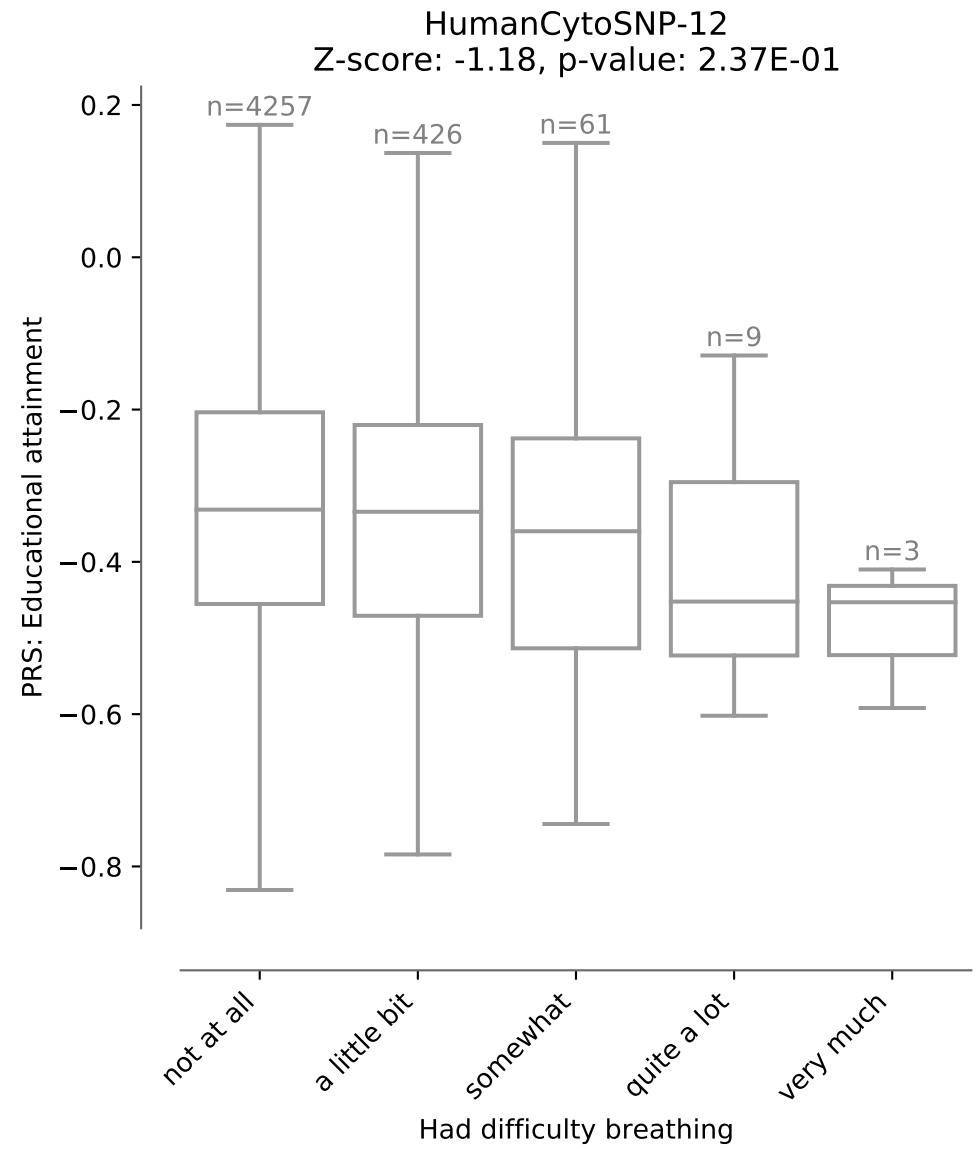

Had difficulty breathing  
PGS: Neuroticism  
Meta analysis Z-score: 4.68, p-value: 2.88E-06

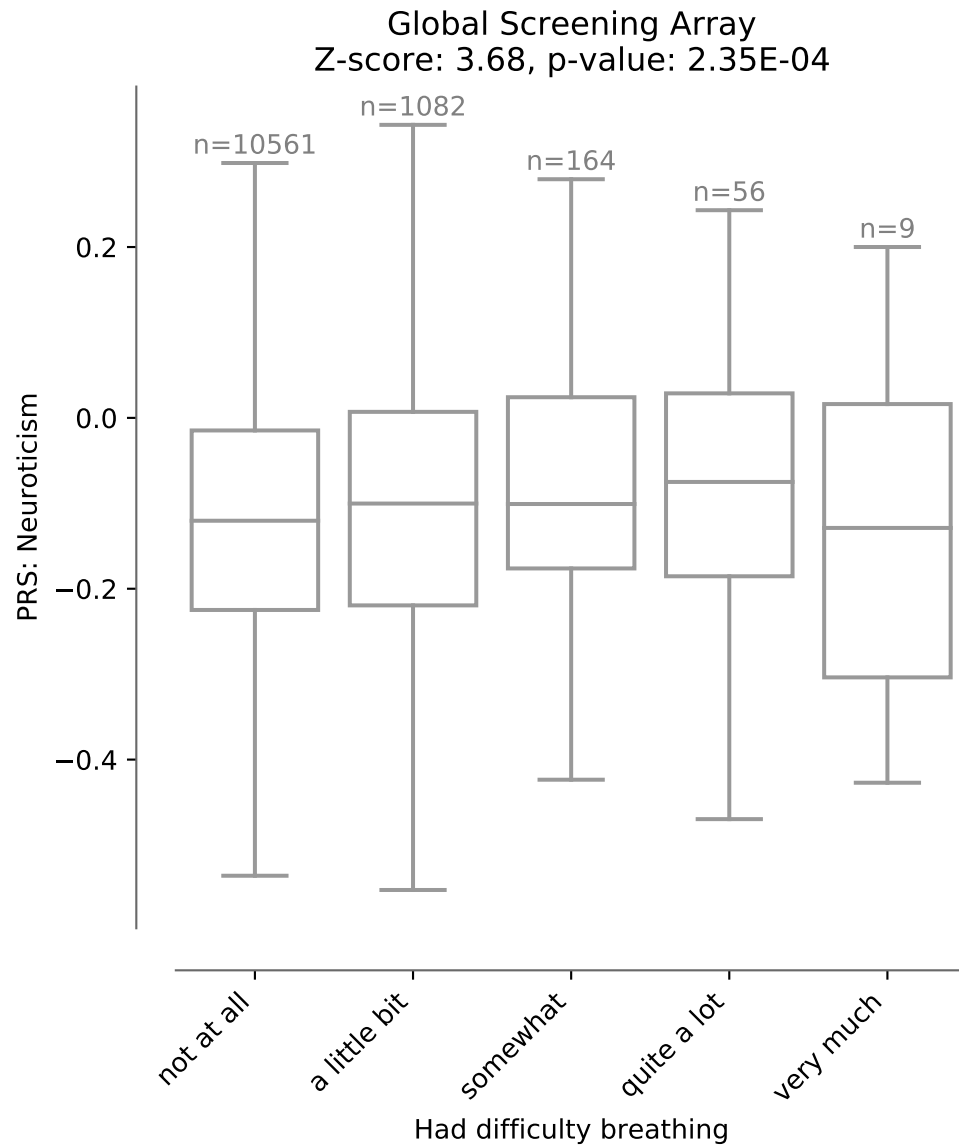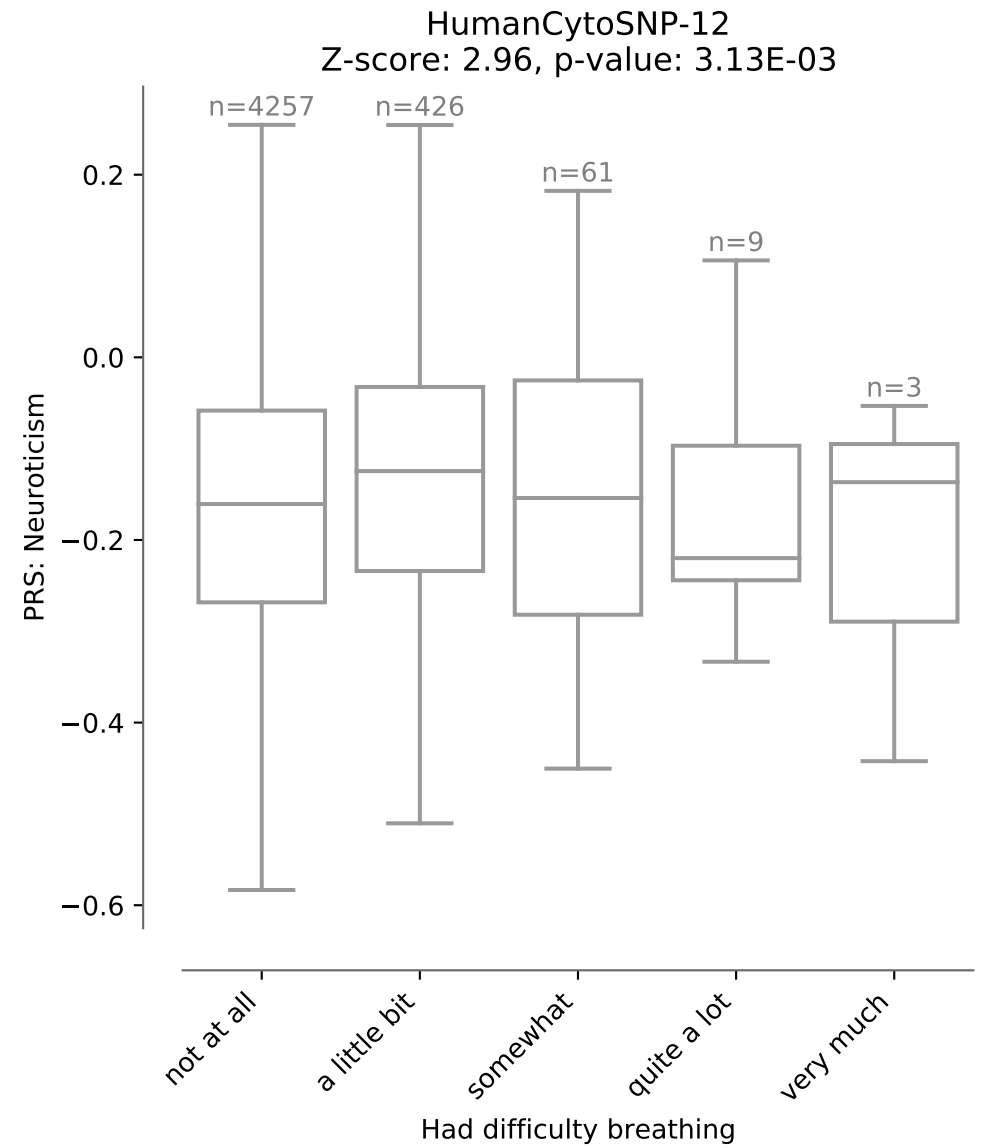

Not visiting vulnerable people for the next 10 days after a high-risk event

PGS: Educational attainment

Meta analysis Z-score: -6.00, p-value: 2.01E-09

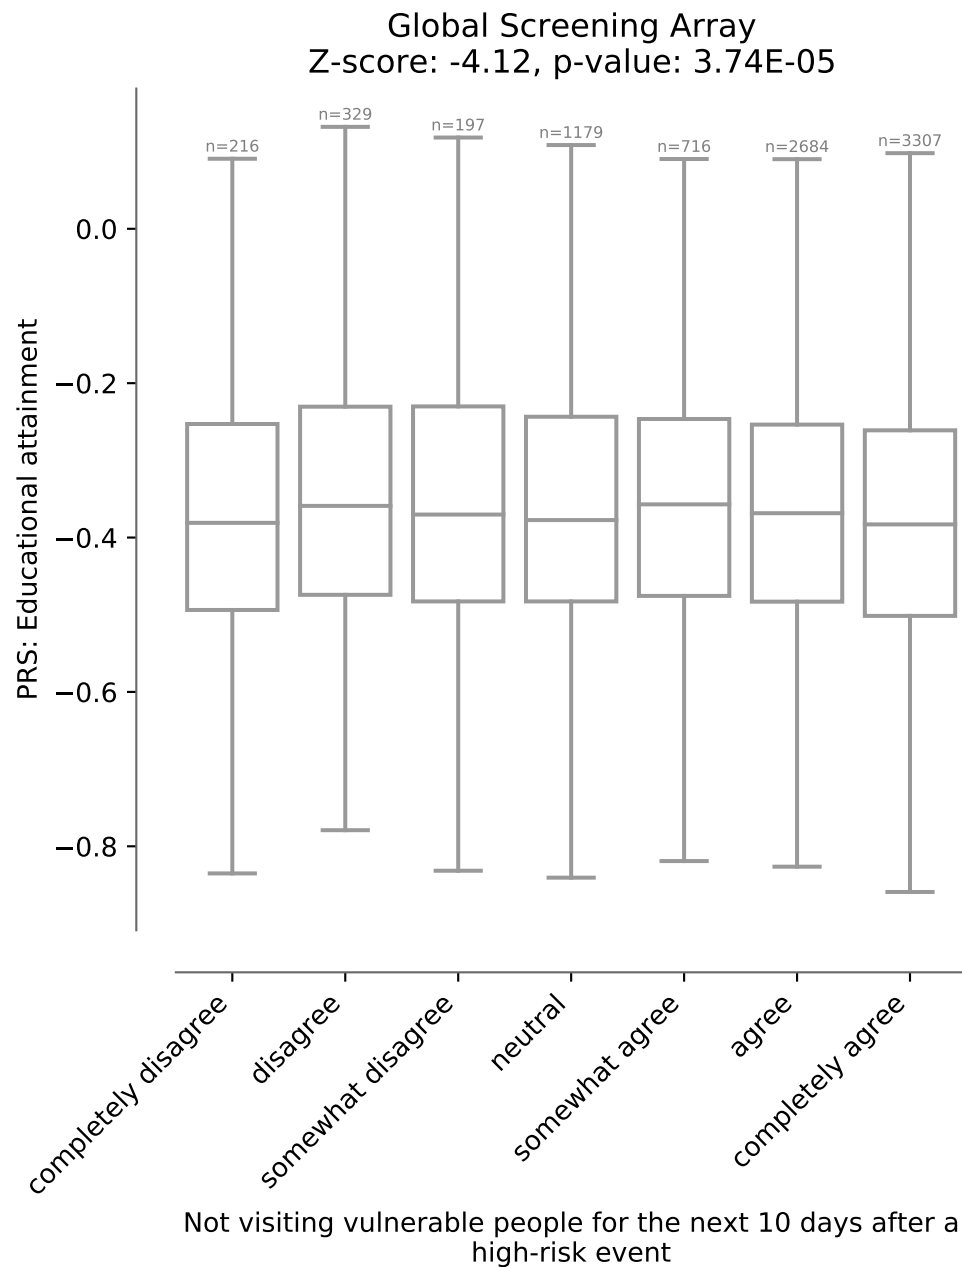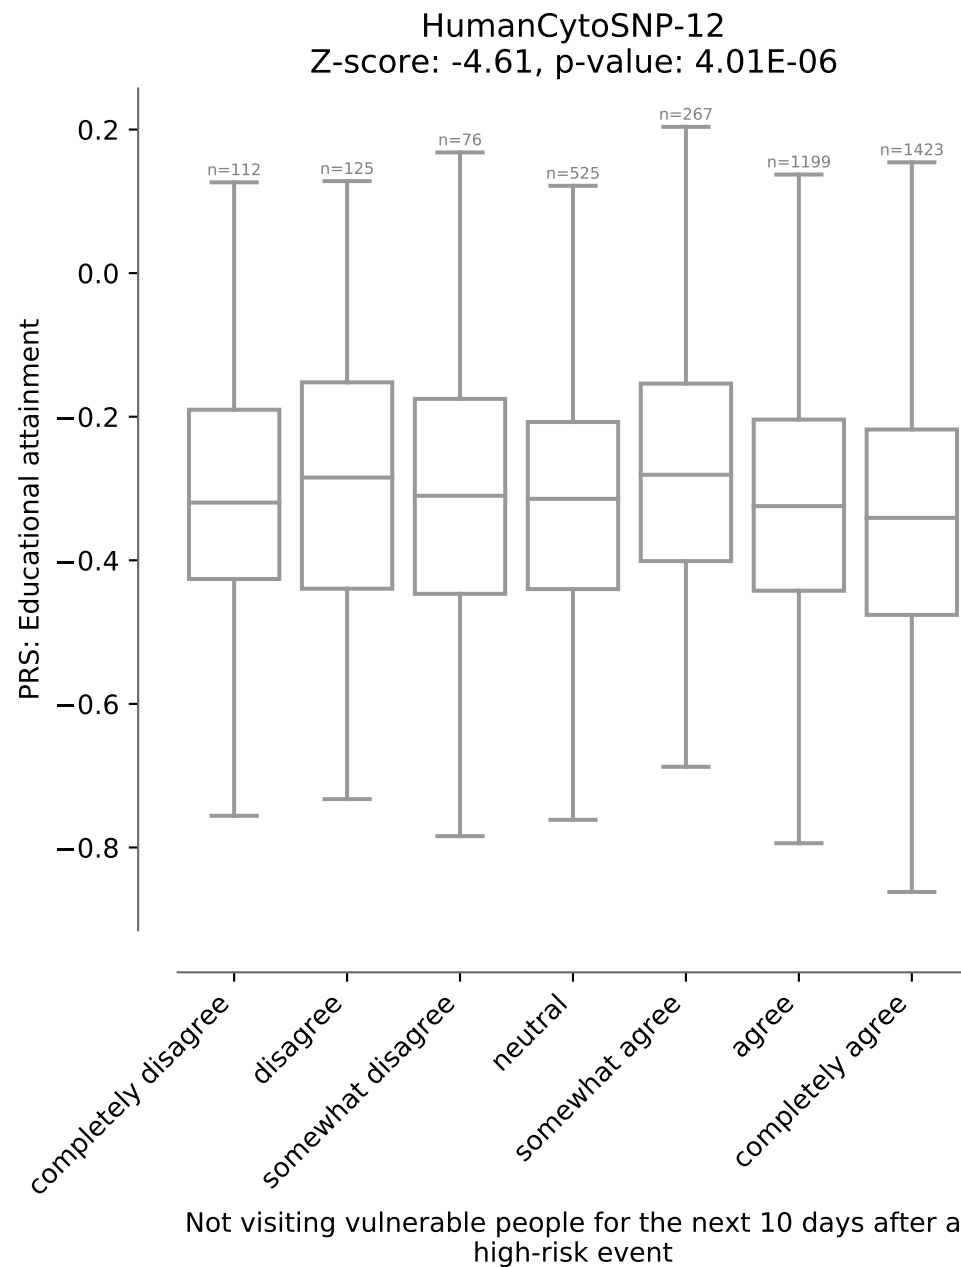

Felt nervous  
PGS: Depression  
Meta analysis Z-score: 5.61, p-value: 2.06E-08

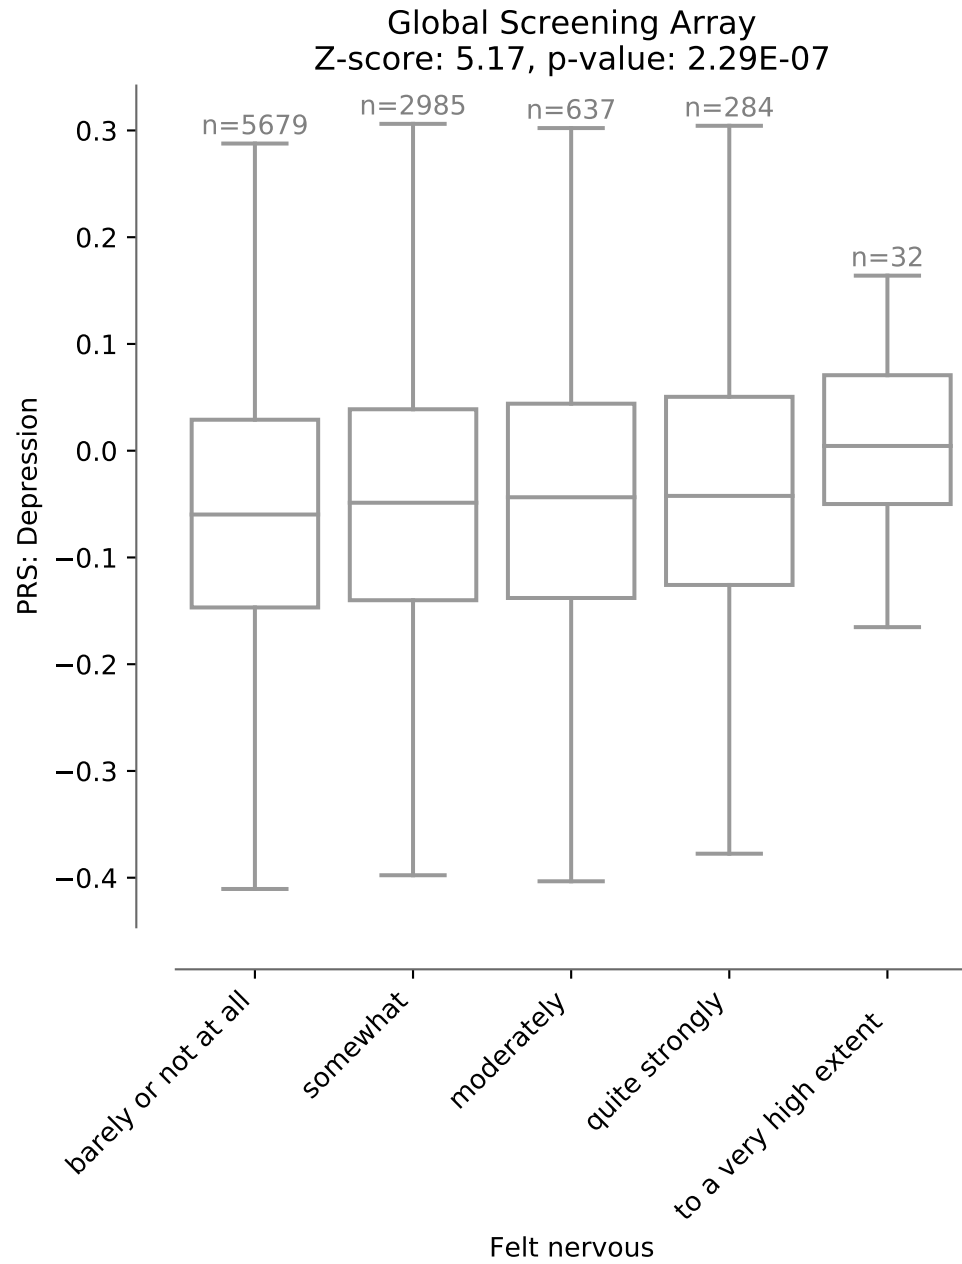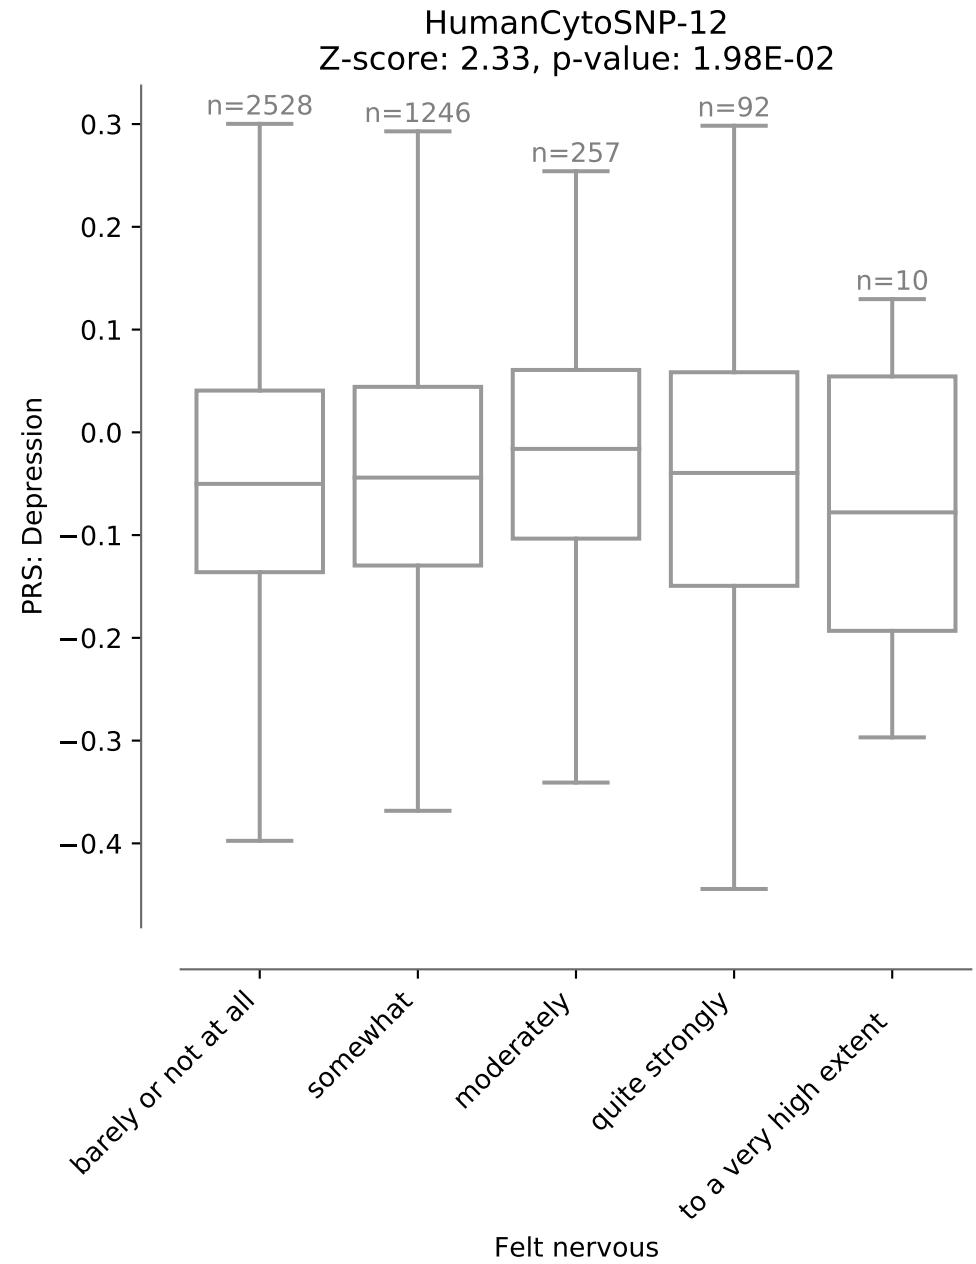

Felt nervous  
PGS: Life satisfaction  
Meta analysis Z-score: -9.46, p-value: 2.98E-21

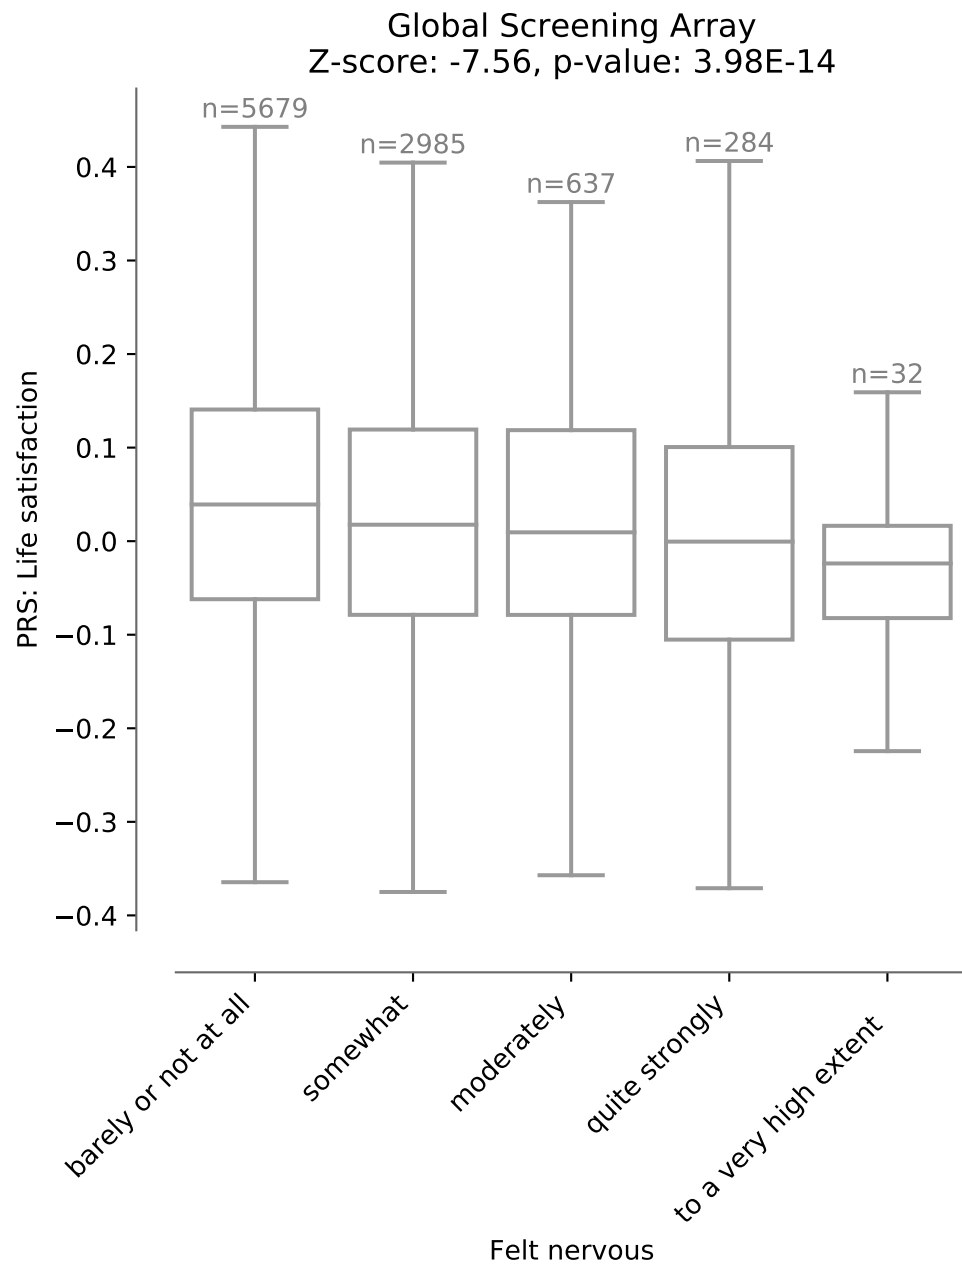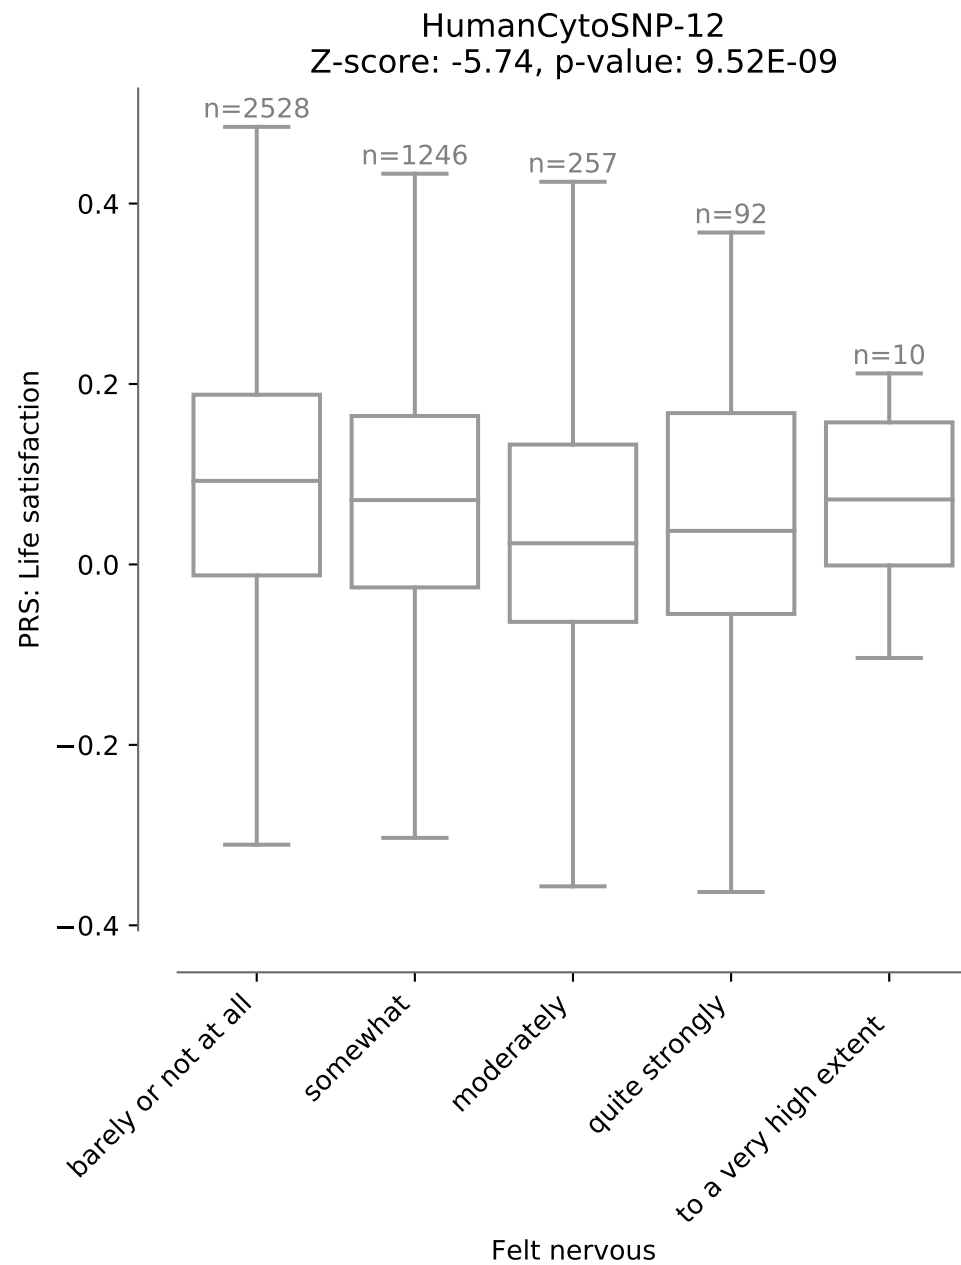

Felt nervous  
PGS: Neuroticism  
Meta analysis Z-score: 9.98, p-value: 1.88E-23

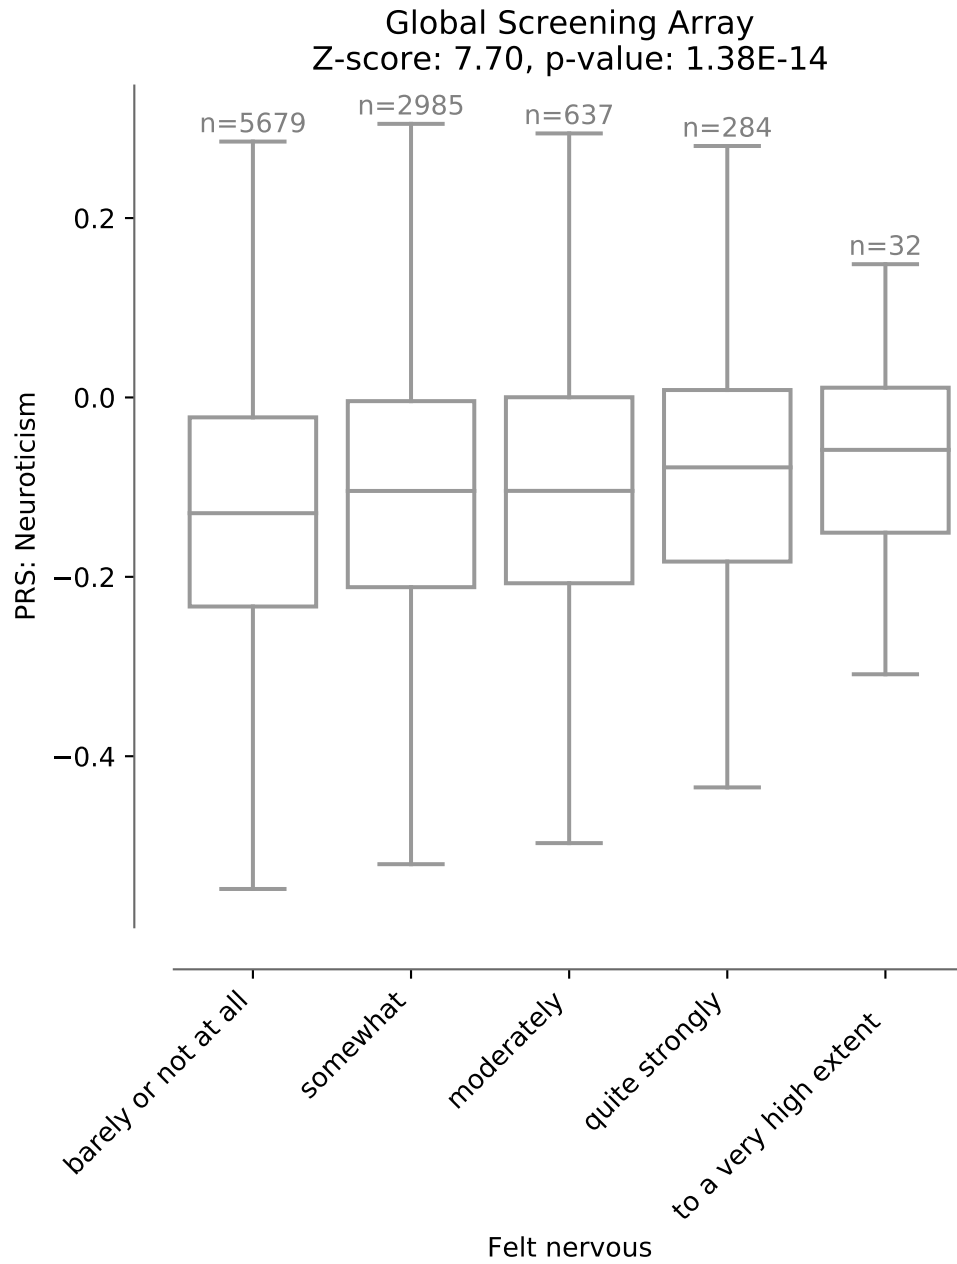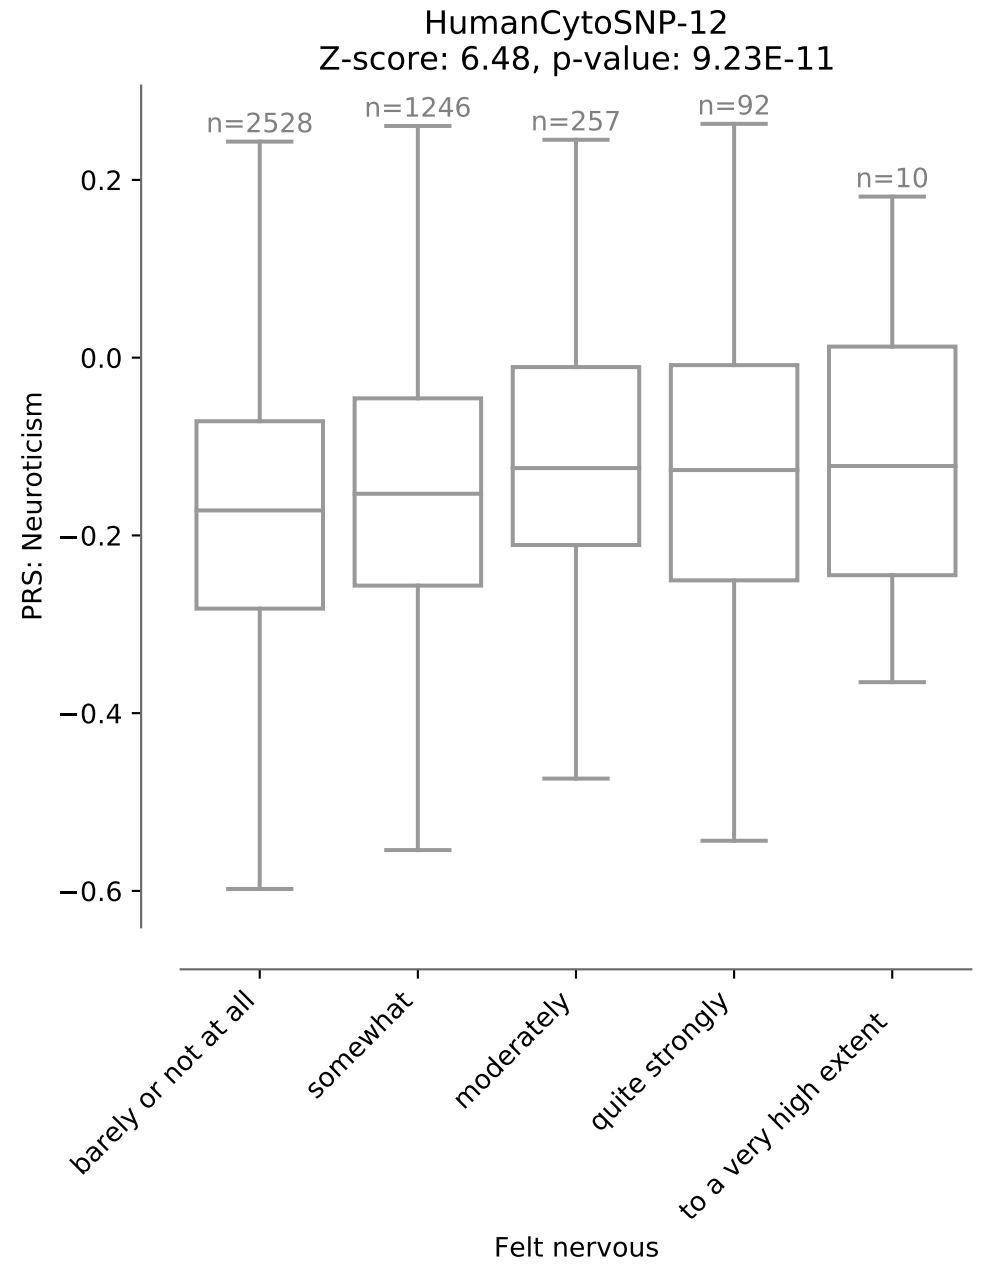

Felt nervous  
PGS: Schizophrenia  
Meta analysis Z-score: 4.54, p-value: 5.61E-06

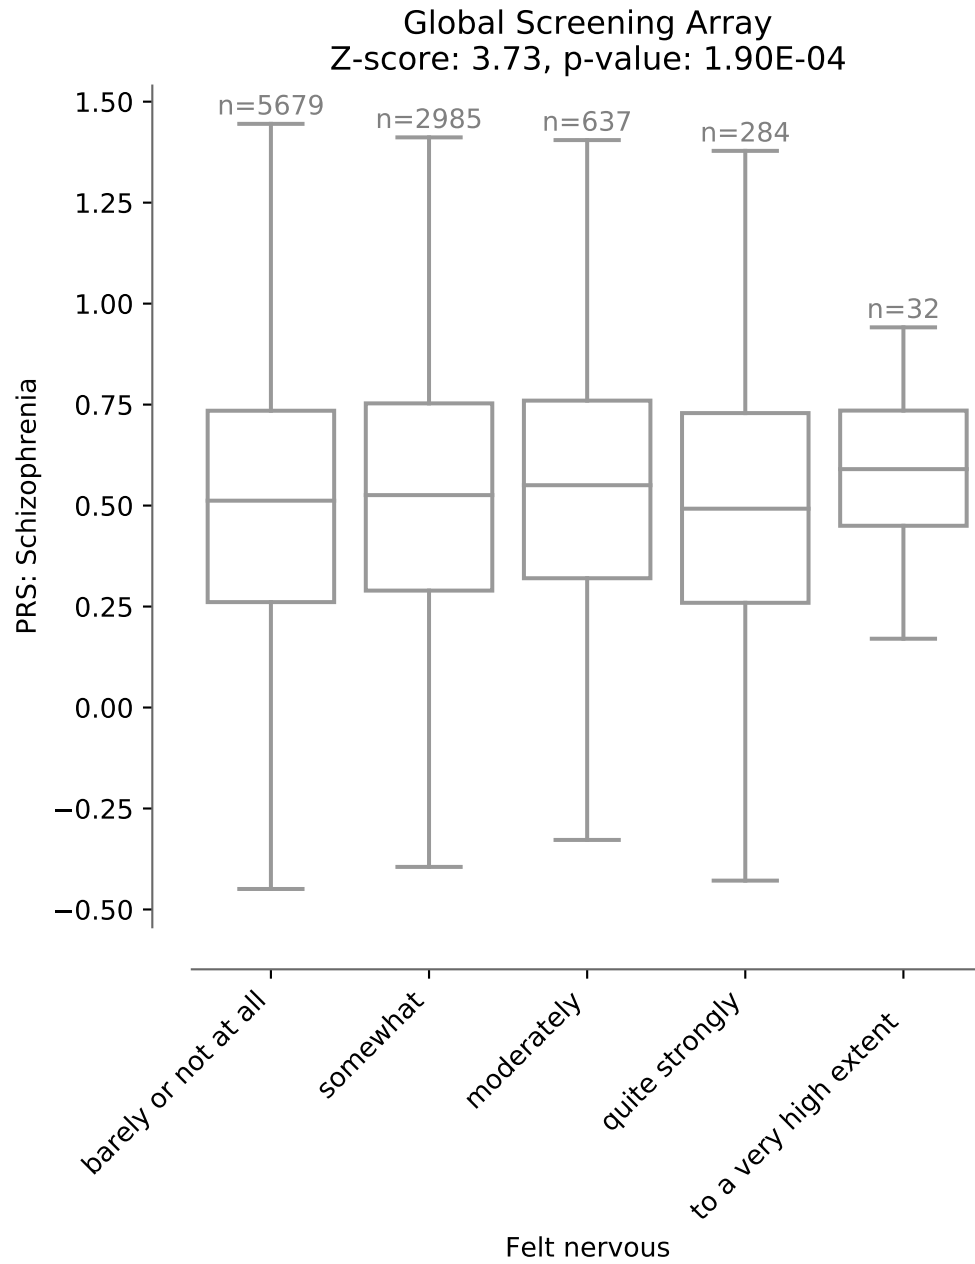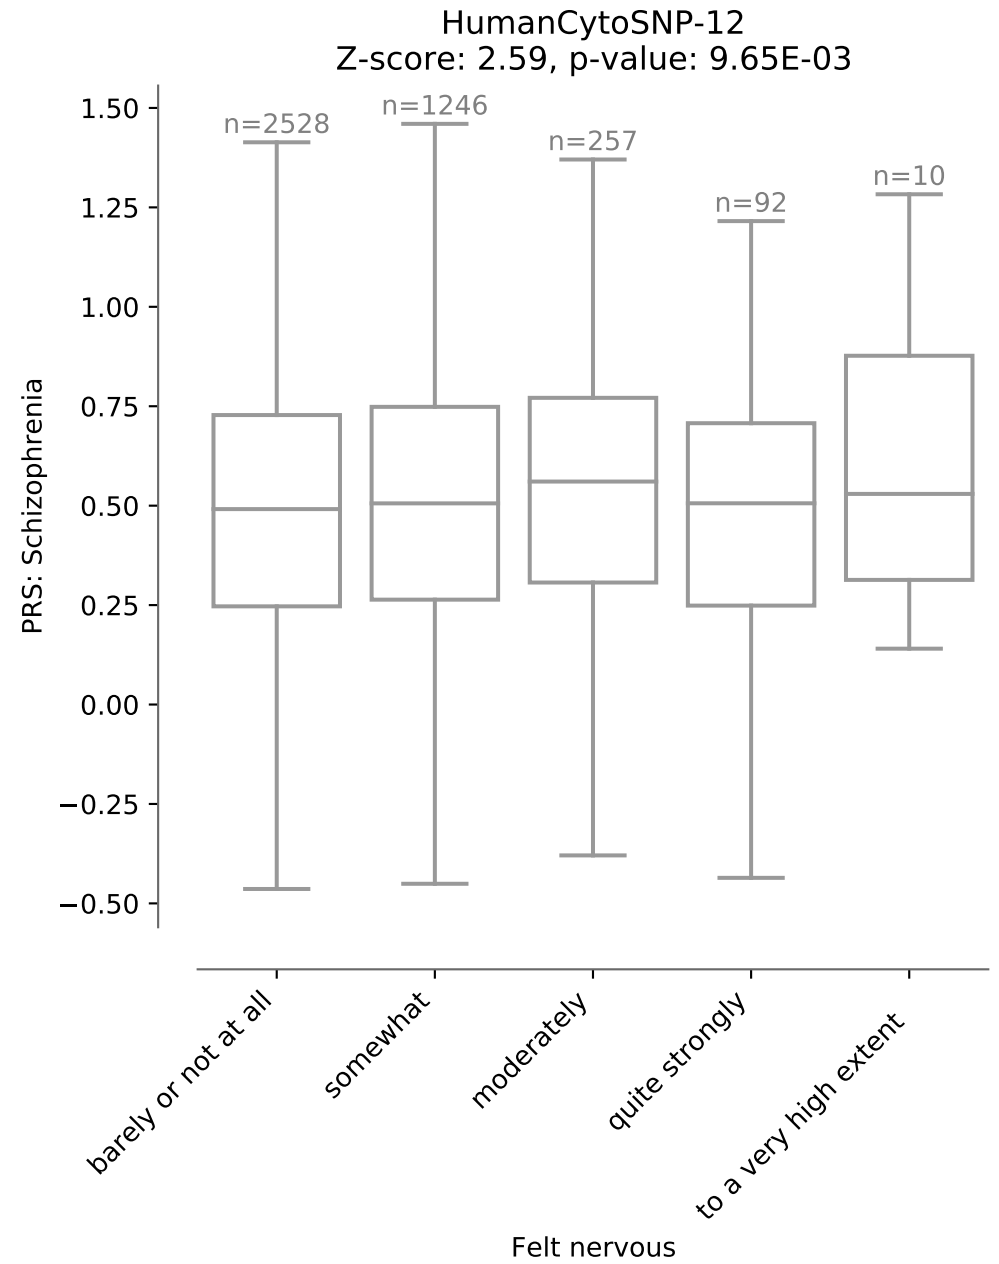

Felt nervous  
PGS: Worry/vulnerability  
Meta analysis Z-score: 5.79, p-value: 7.14E-09

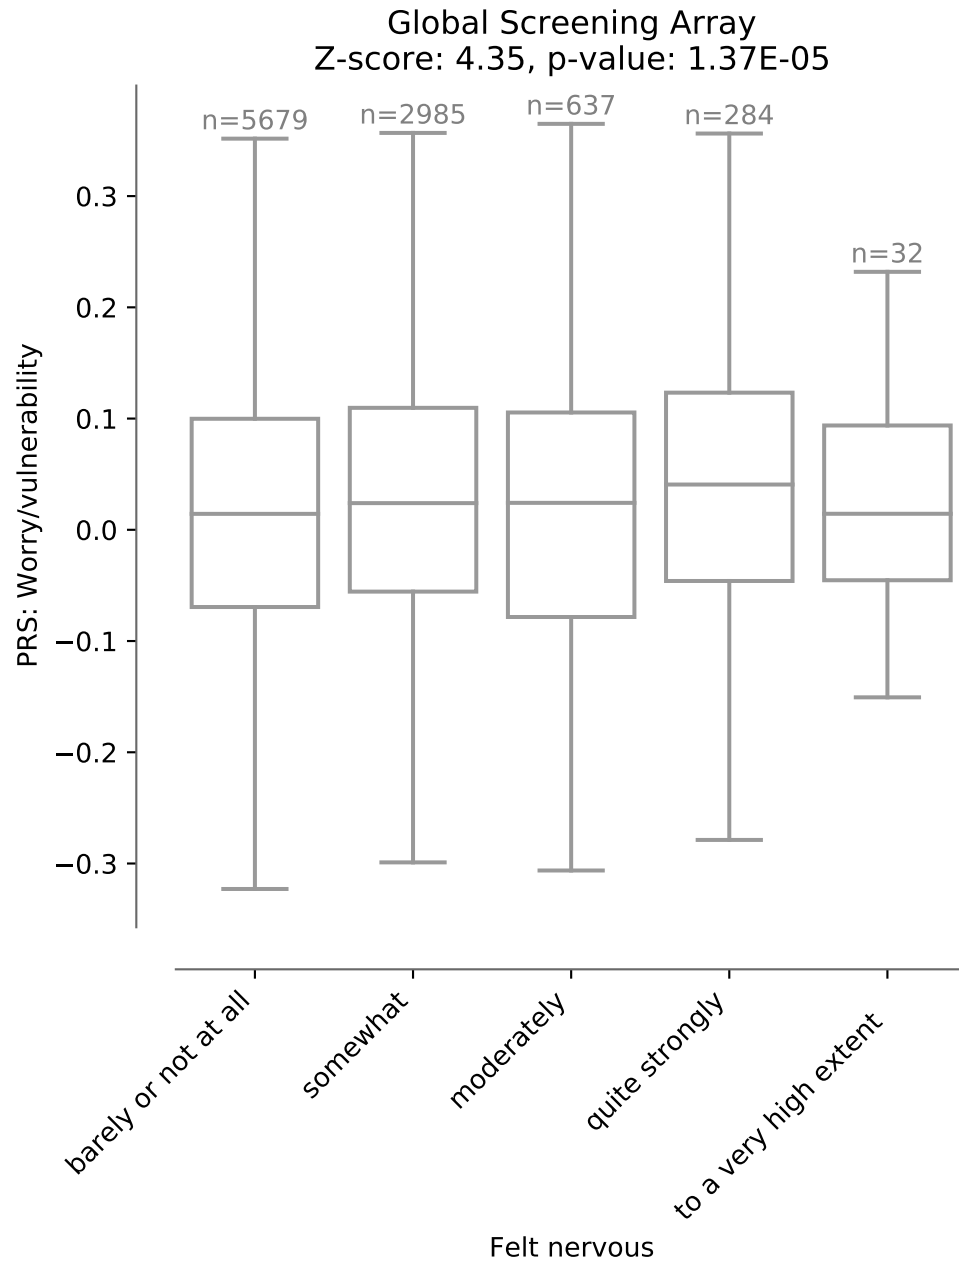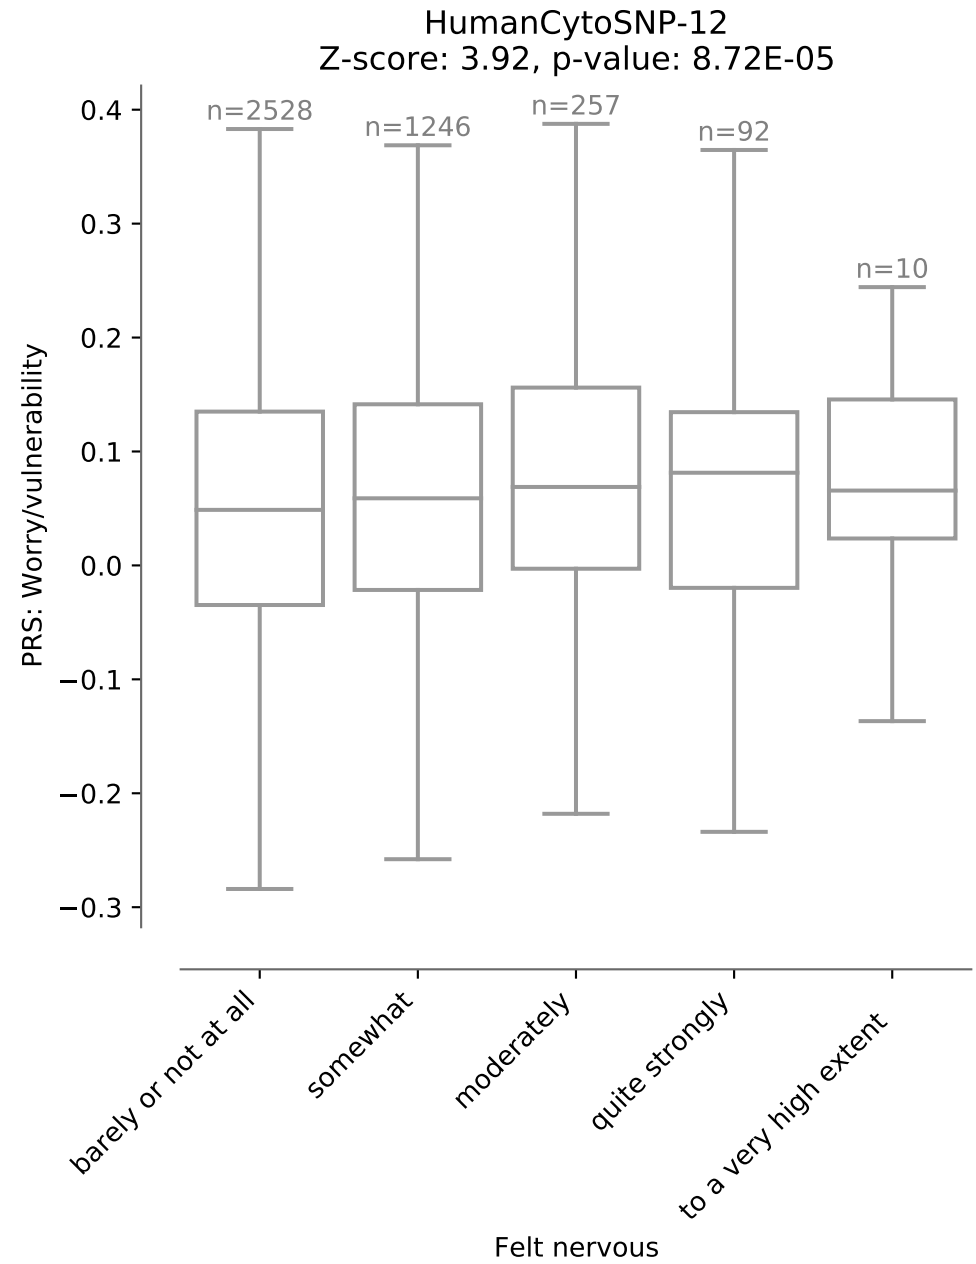



Sneezing  
PGS: Depression  
Meta analysis Z-score: 4.97, p-value: 6.77E-07

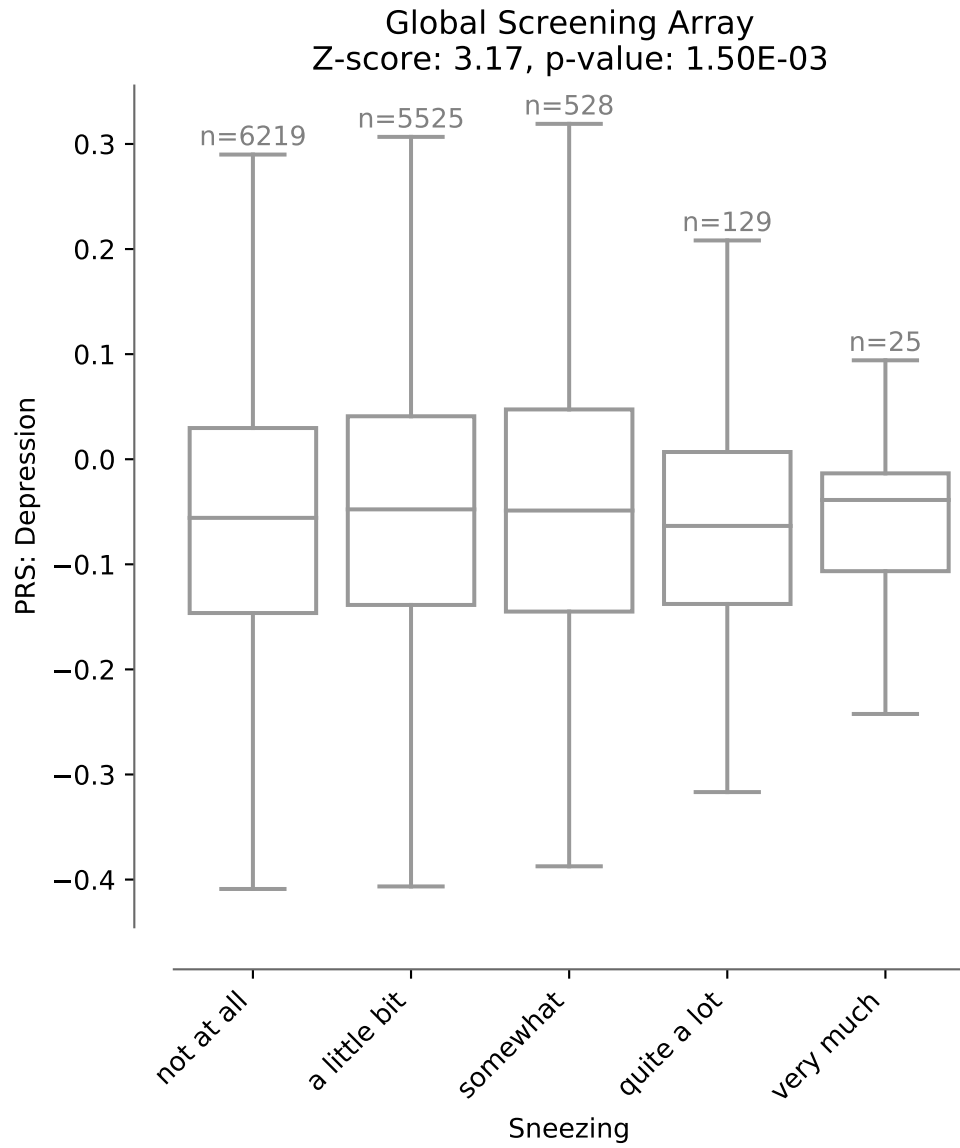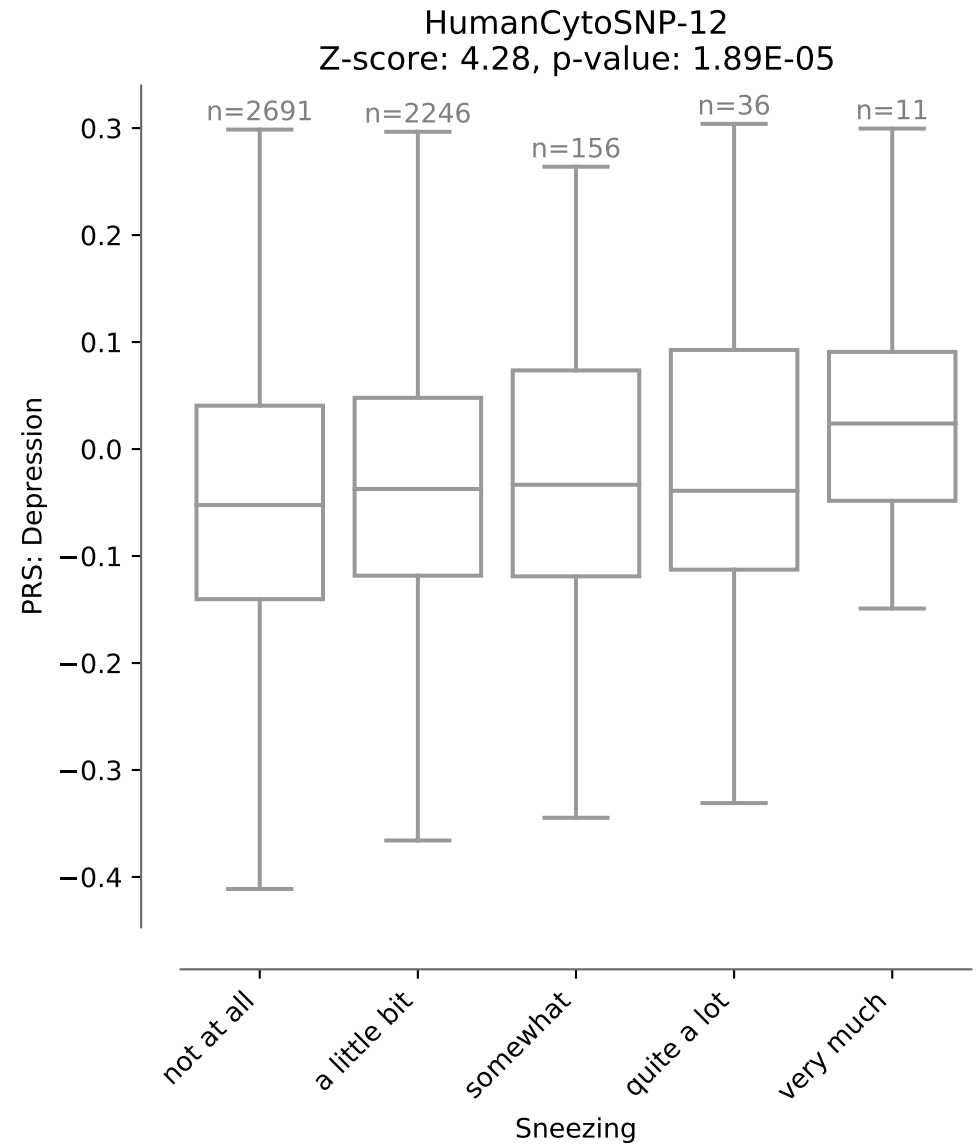

Sneezing  
PGS: Life satisfaction  
Meta analysis Z-score: -5.20, p-value: 2.01E-07

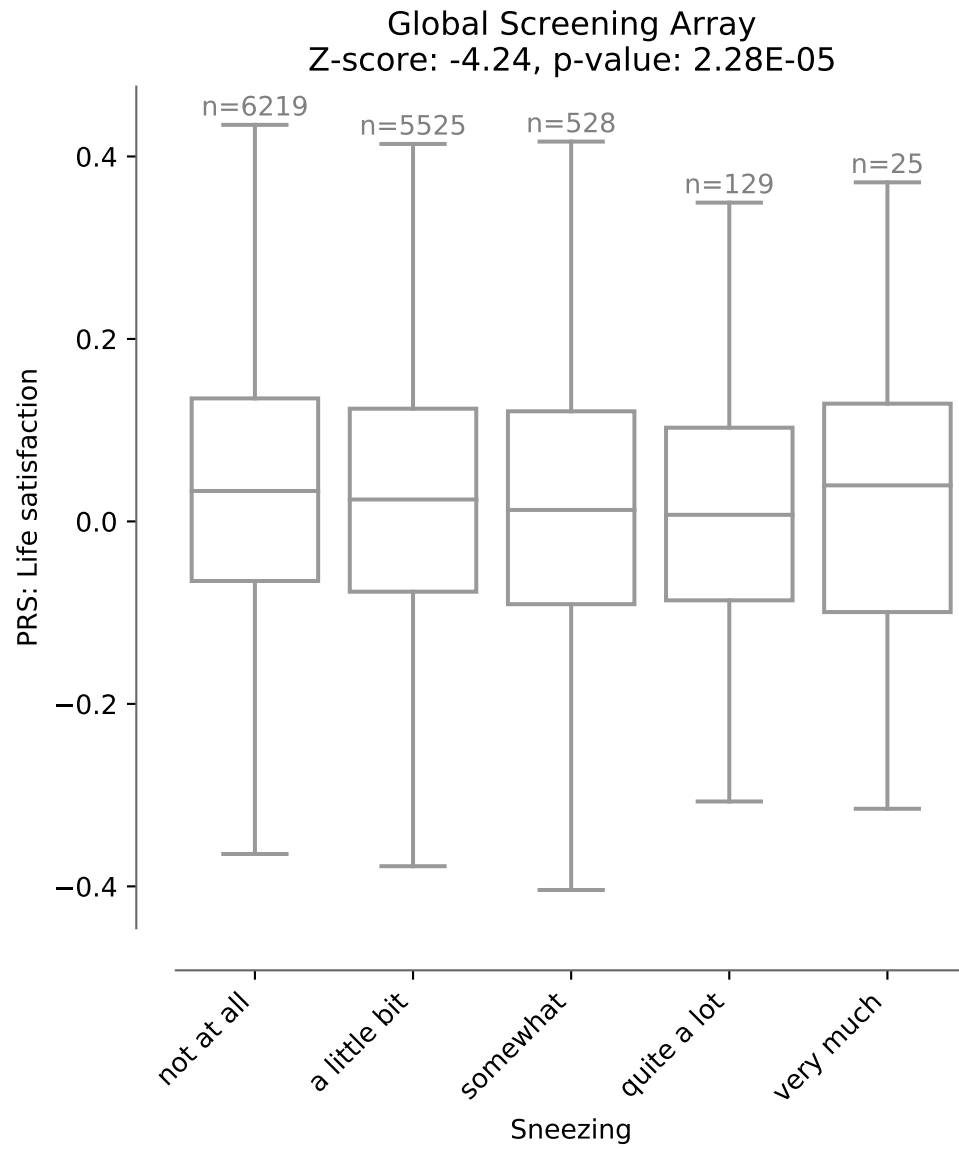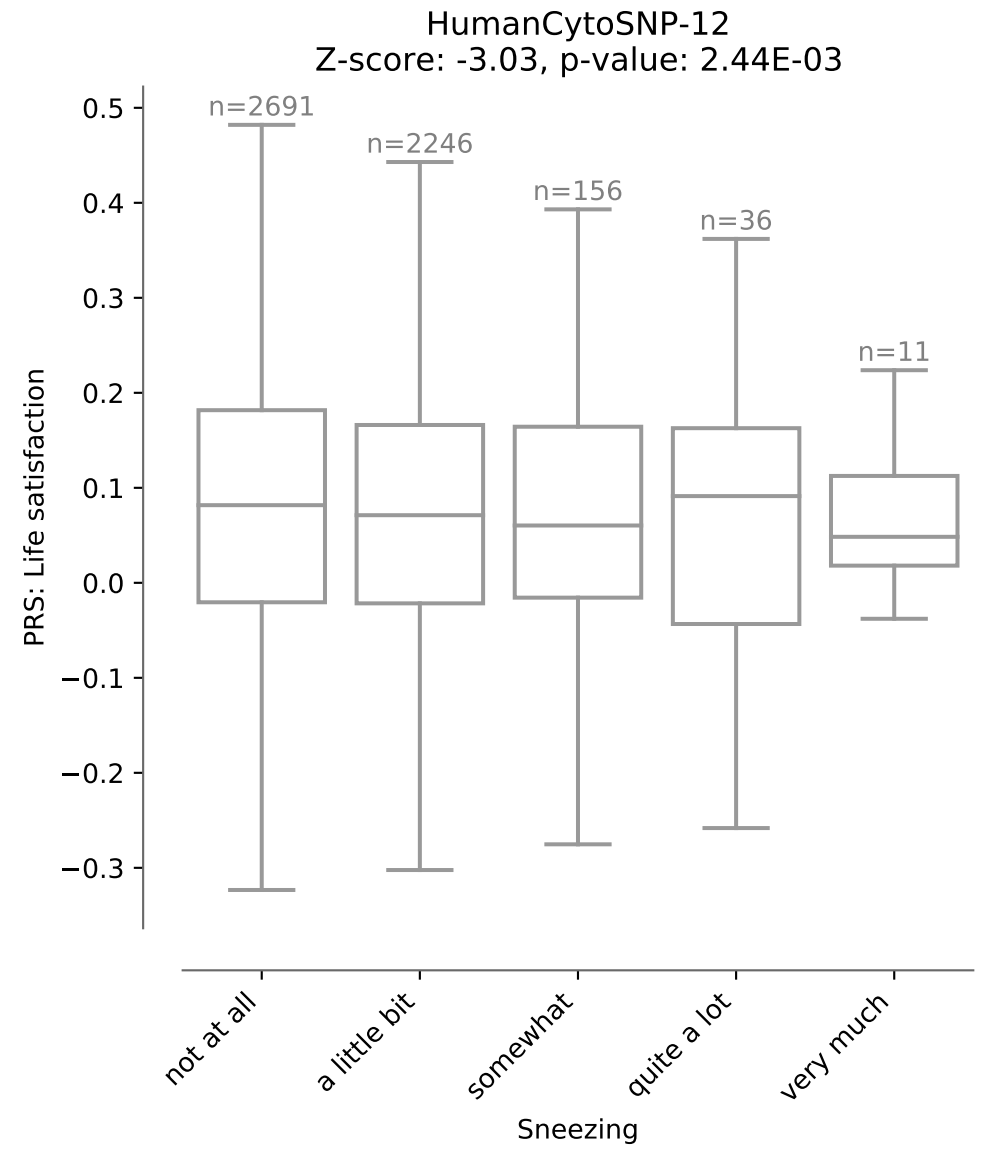

Had pain in upper back  
PGS: Depression  
Meta analysis Z-score: 5.49, p-value: 3.93E-08

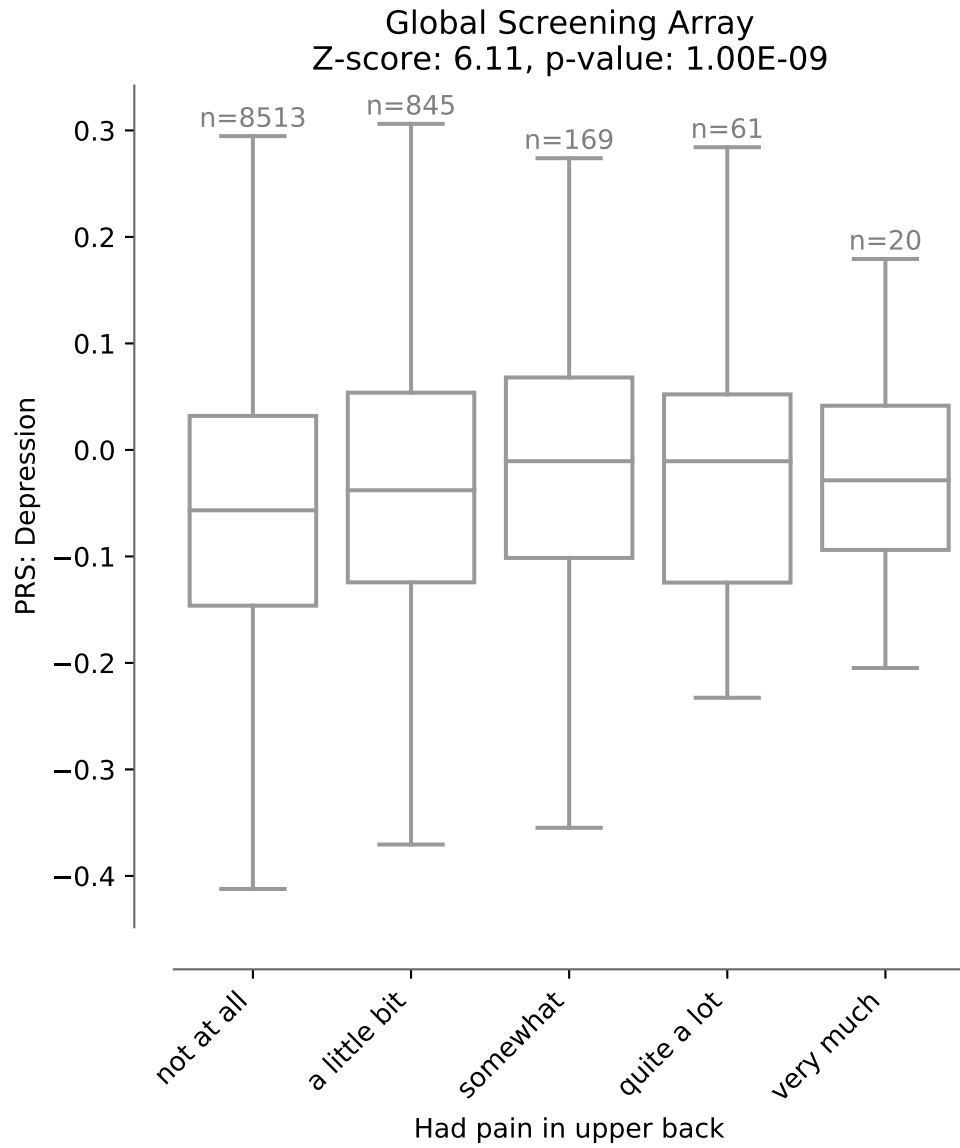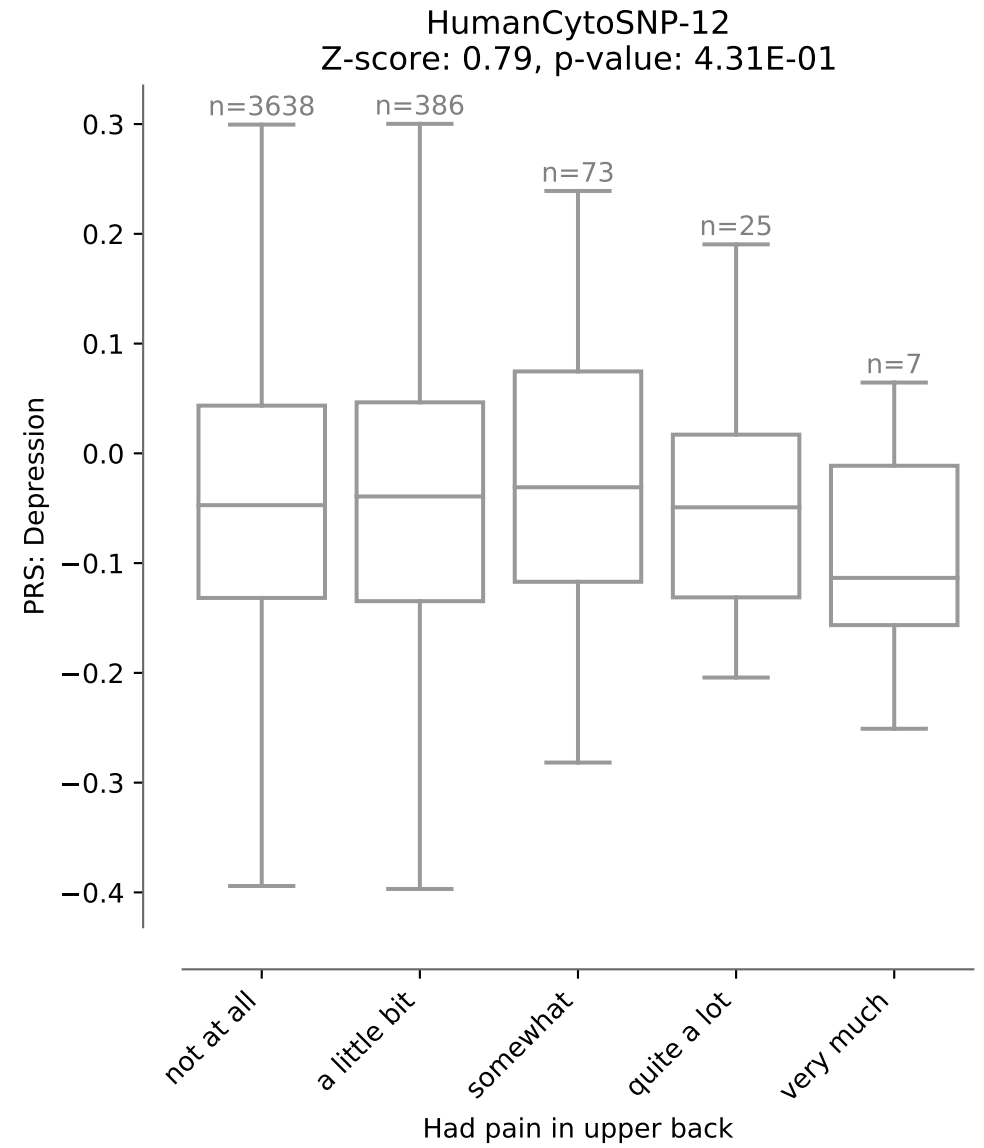

Had pain in upper back  
PGS: Life satisfaction  
Meta analysis Z-score: -6.70, p-value: 2.05E-11

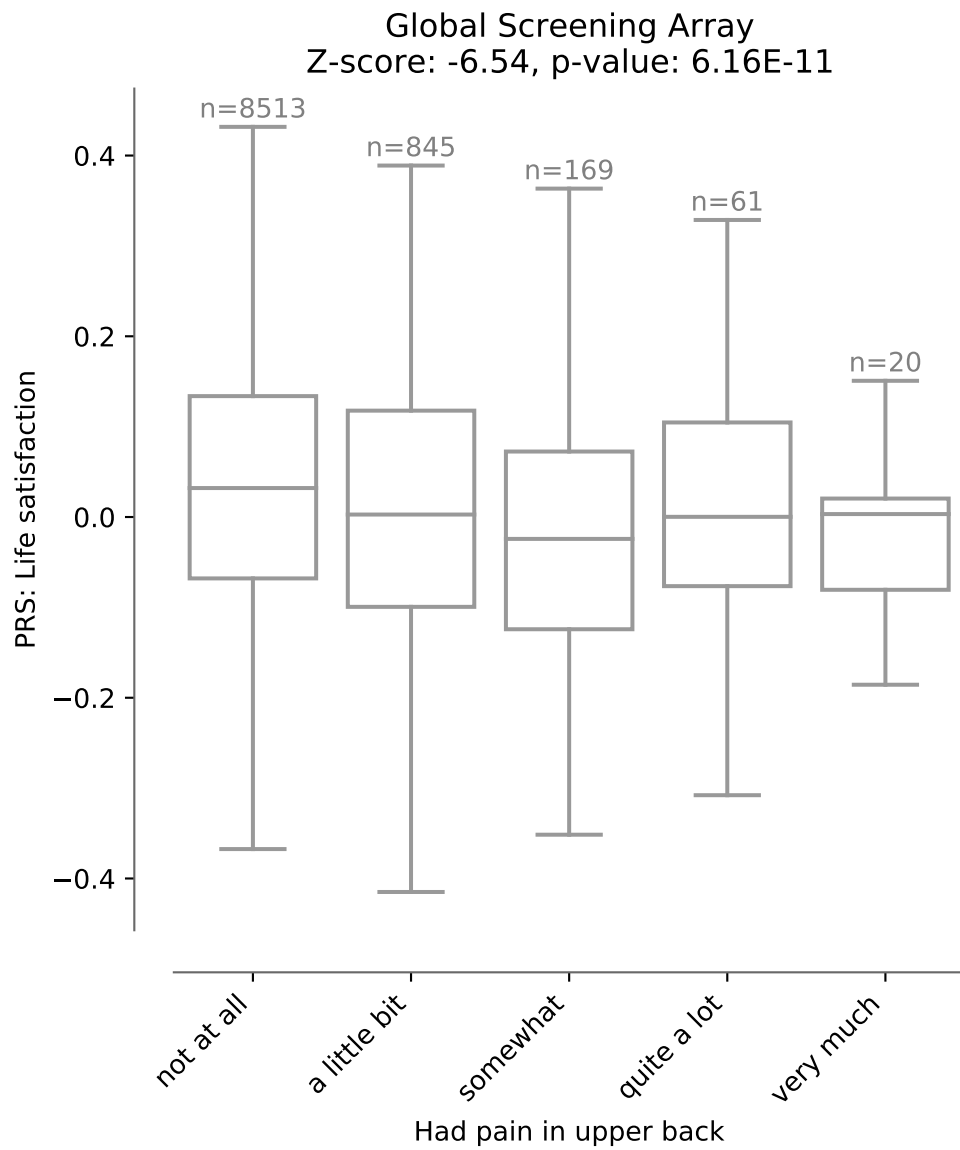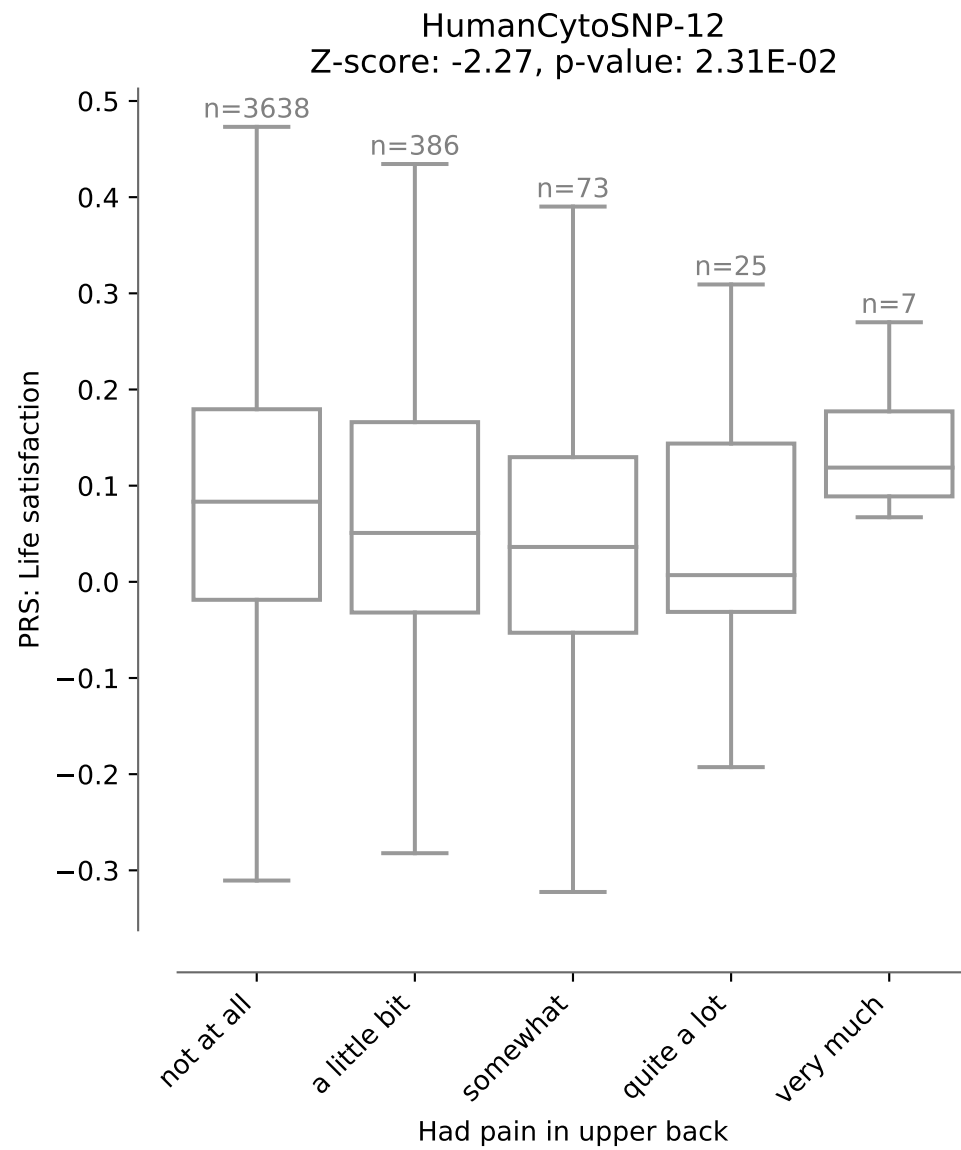

Had pain in upper back  
PGS: Neuroticism  
Meta analysis Z-score: 4.94, p-value: 7.65E-07

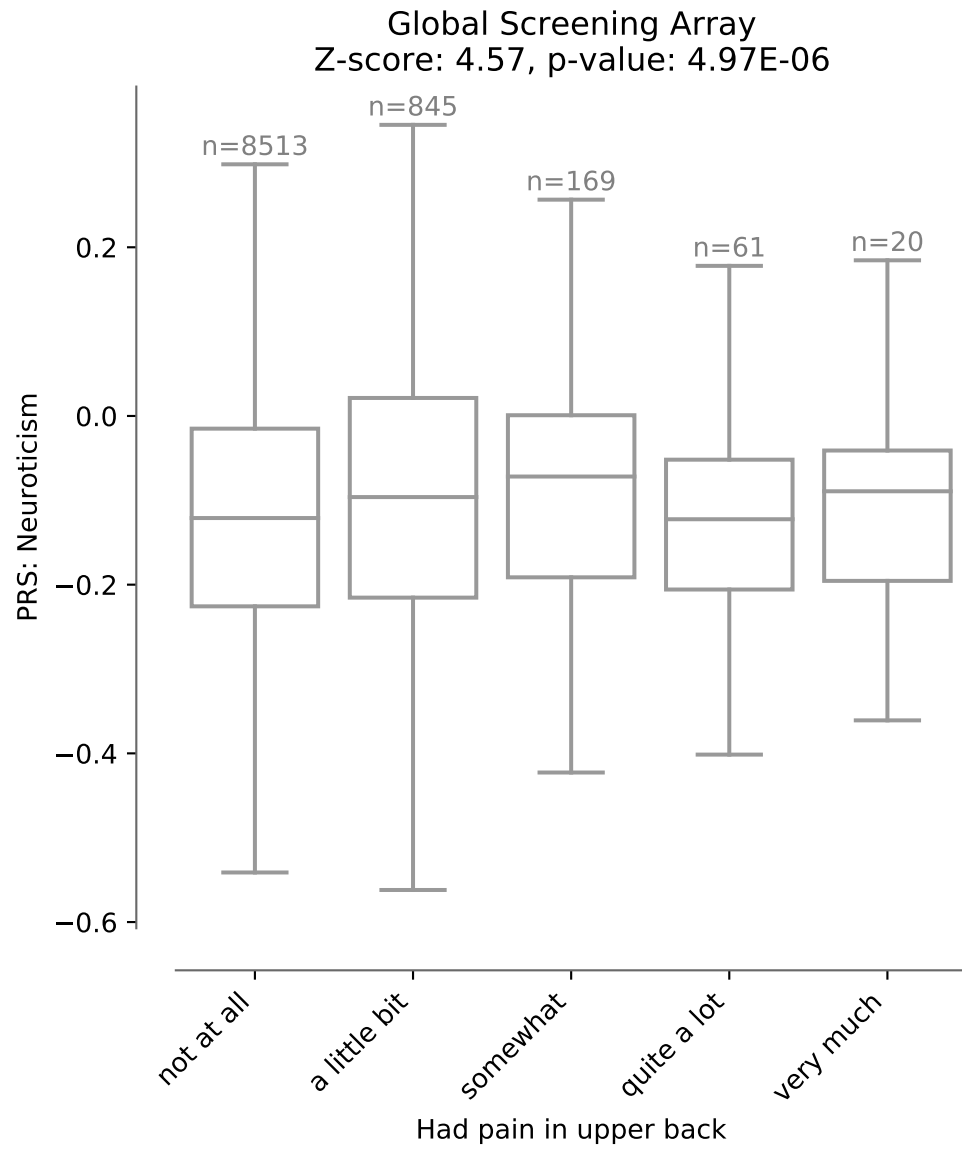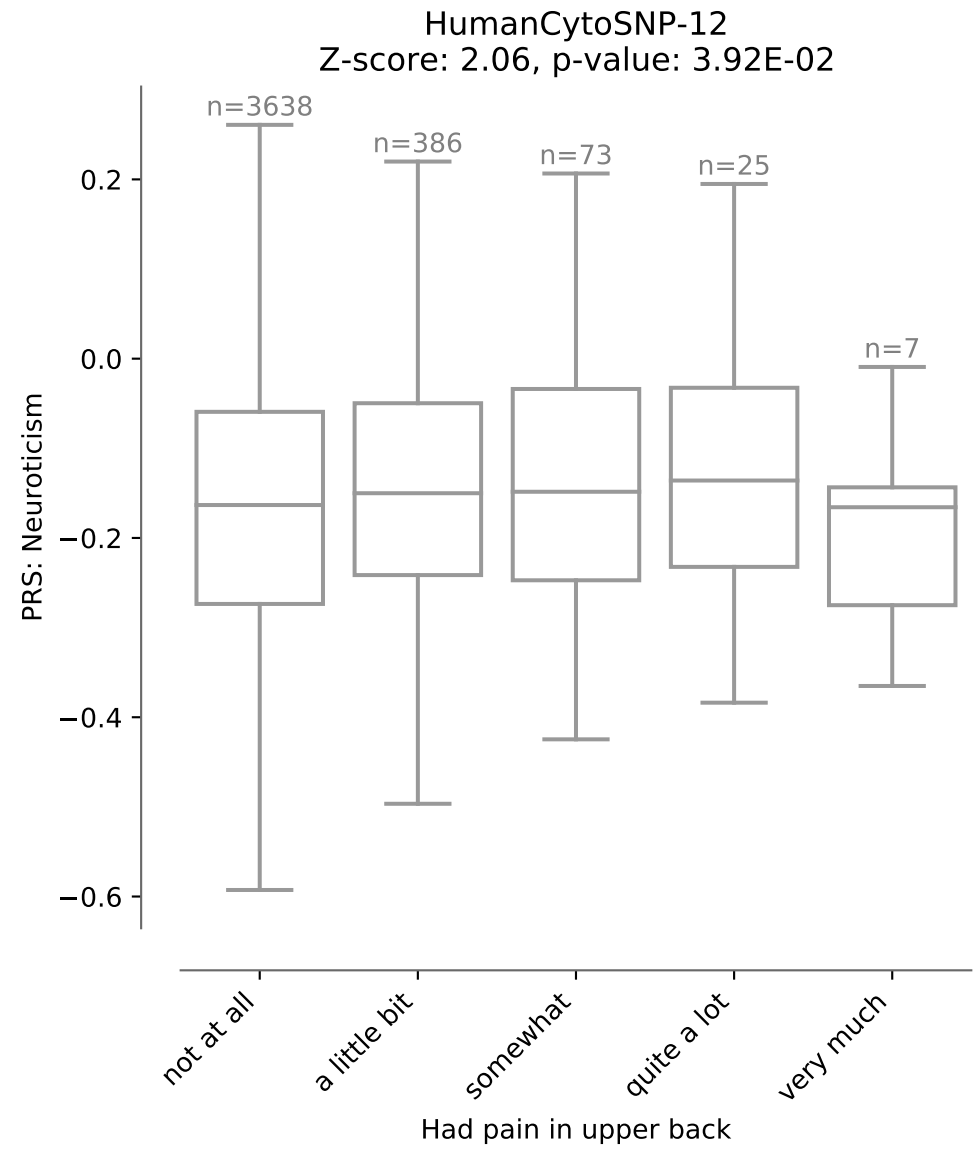

Had heart or chest pain  
PGS: Depression  
Meta analysis Z-score: 6.41, p-value: 1.48E-10

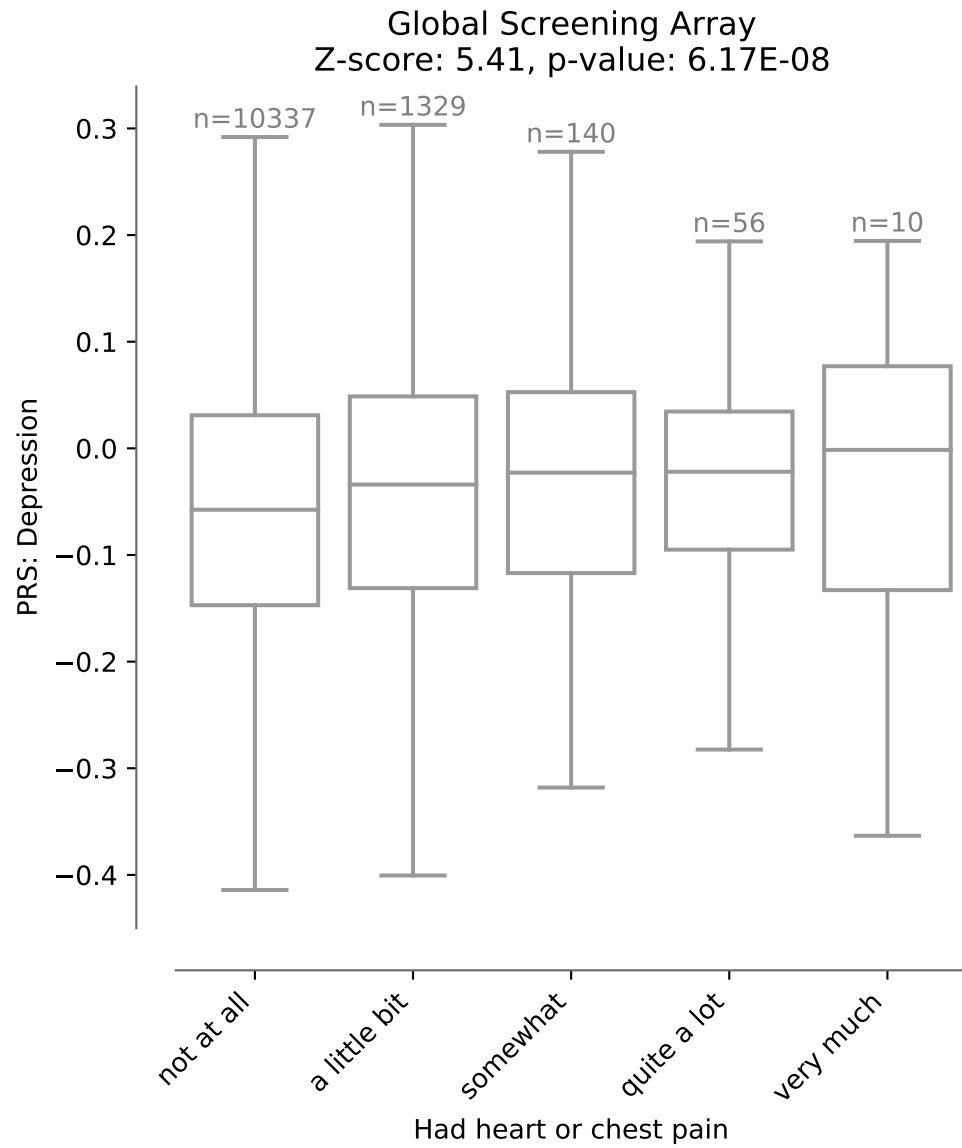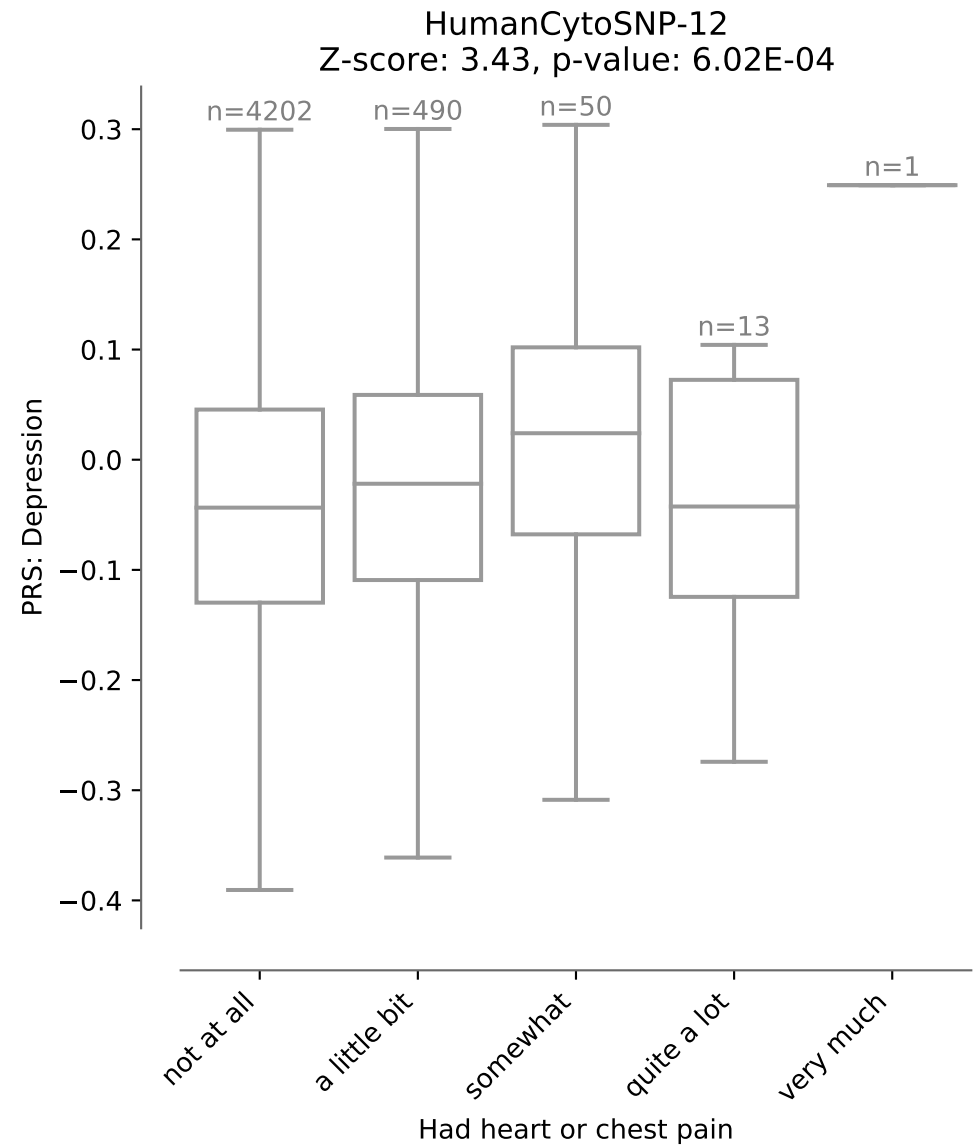

Had heart or chest pain  
PGS: Life satisfaction  
Meta analysis Z-score: -6.24, p-value: 4.48E-10

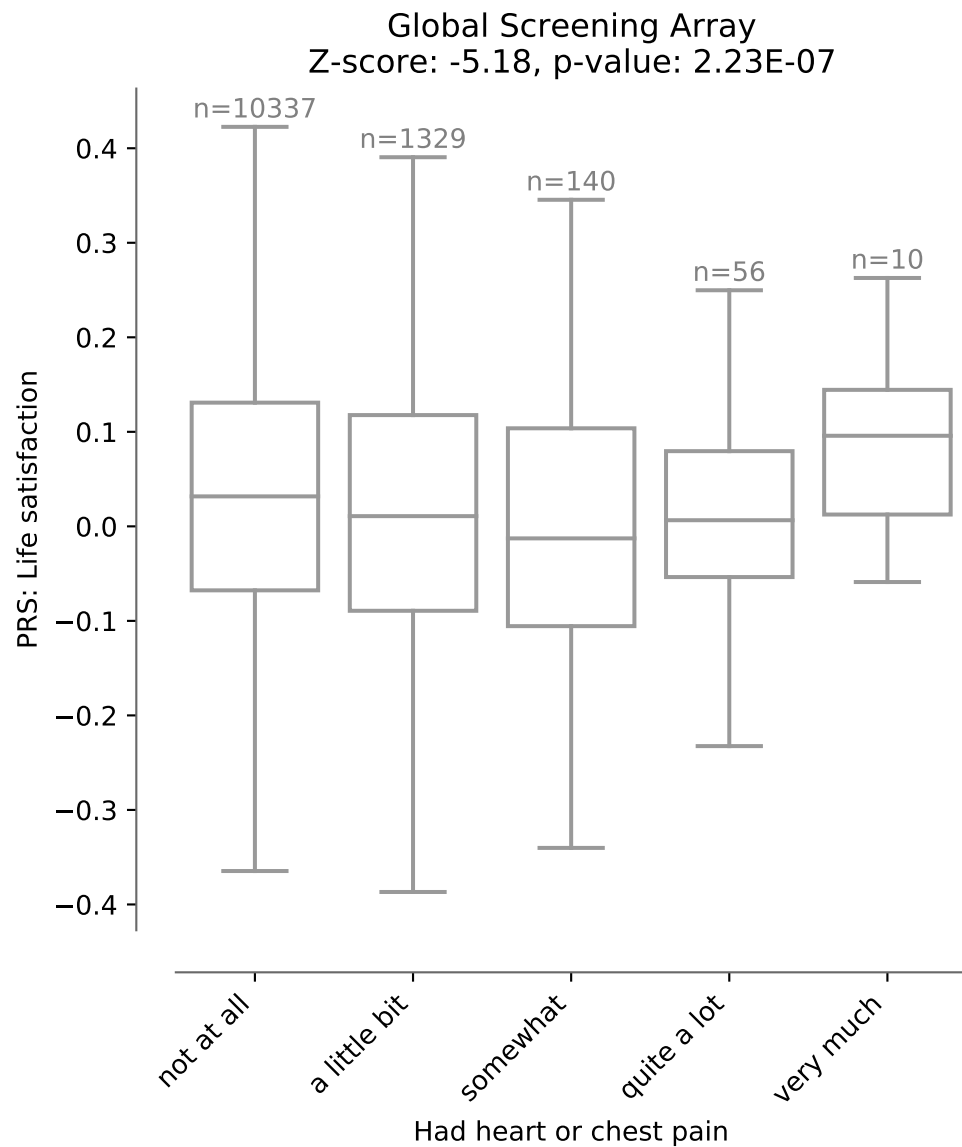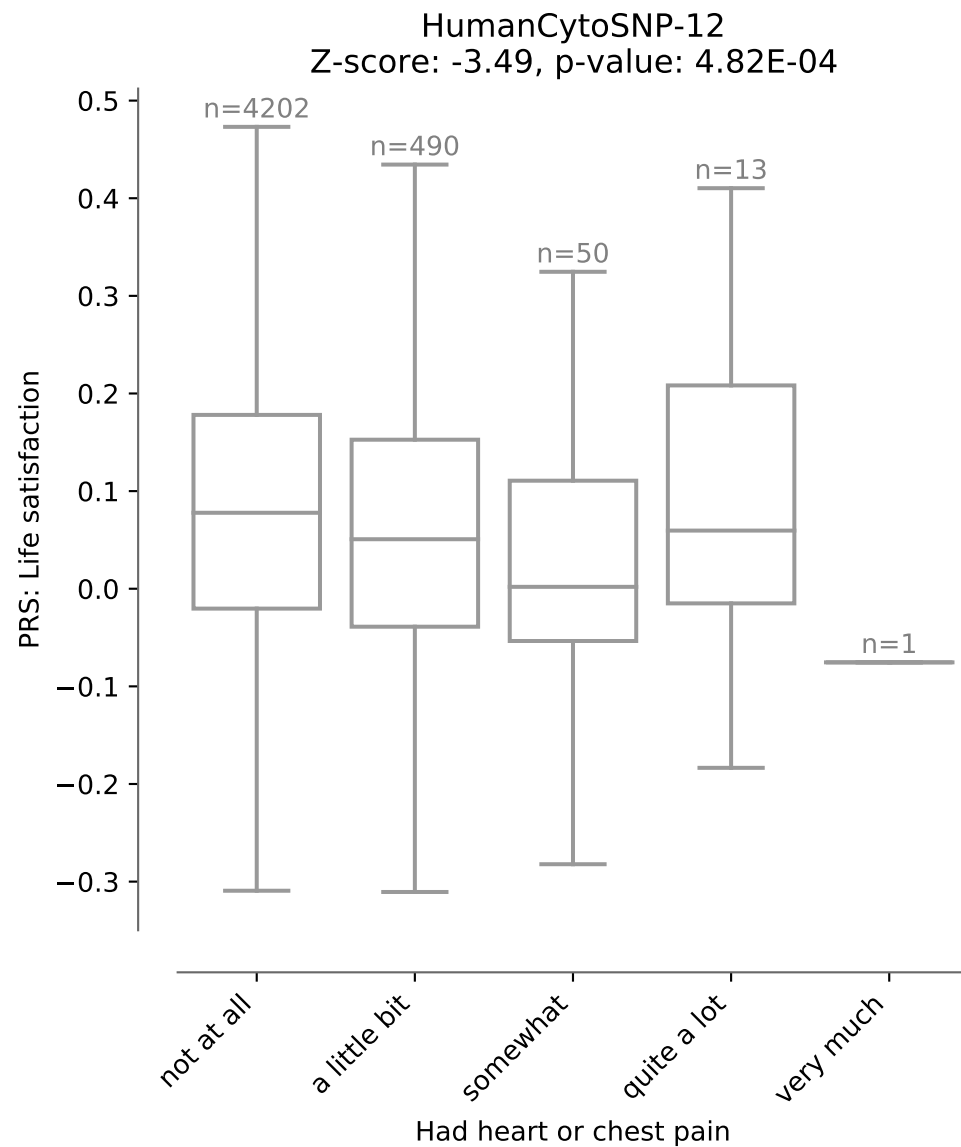

Had heart or chest pain  
PGS: Neuroticism  
Meta analysis Z-score: 4.79, p-value: 1.63E-06

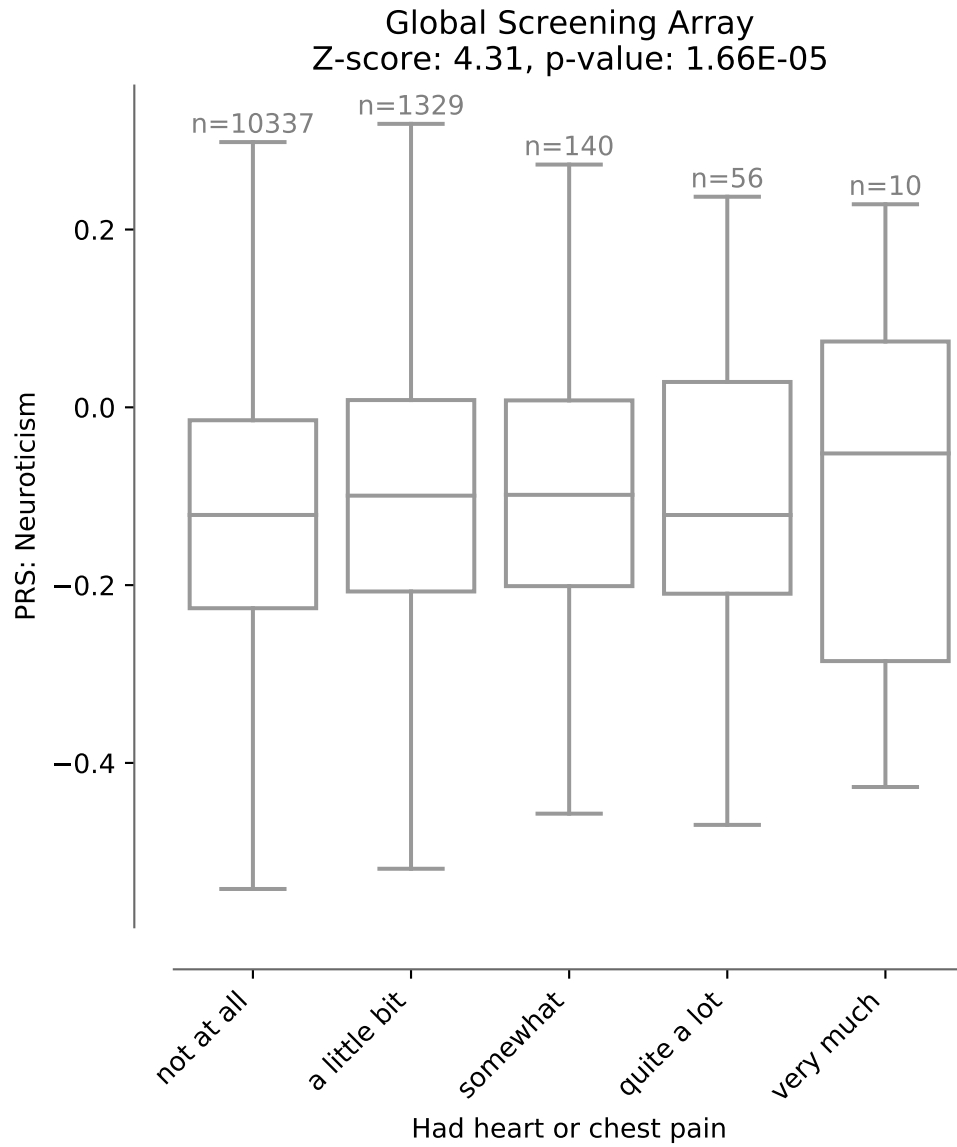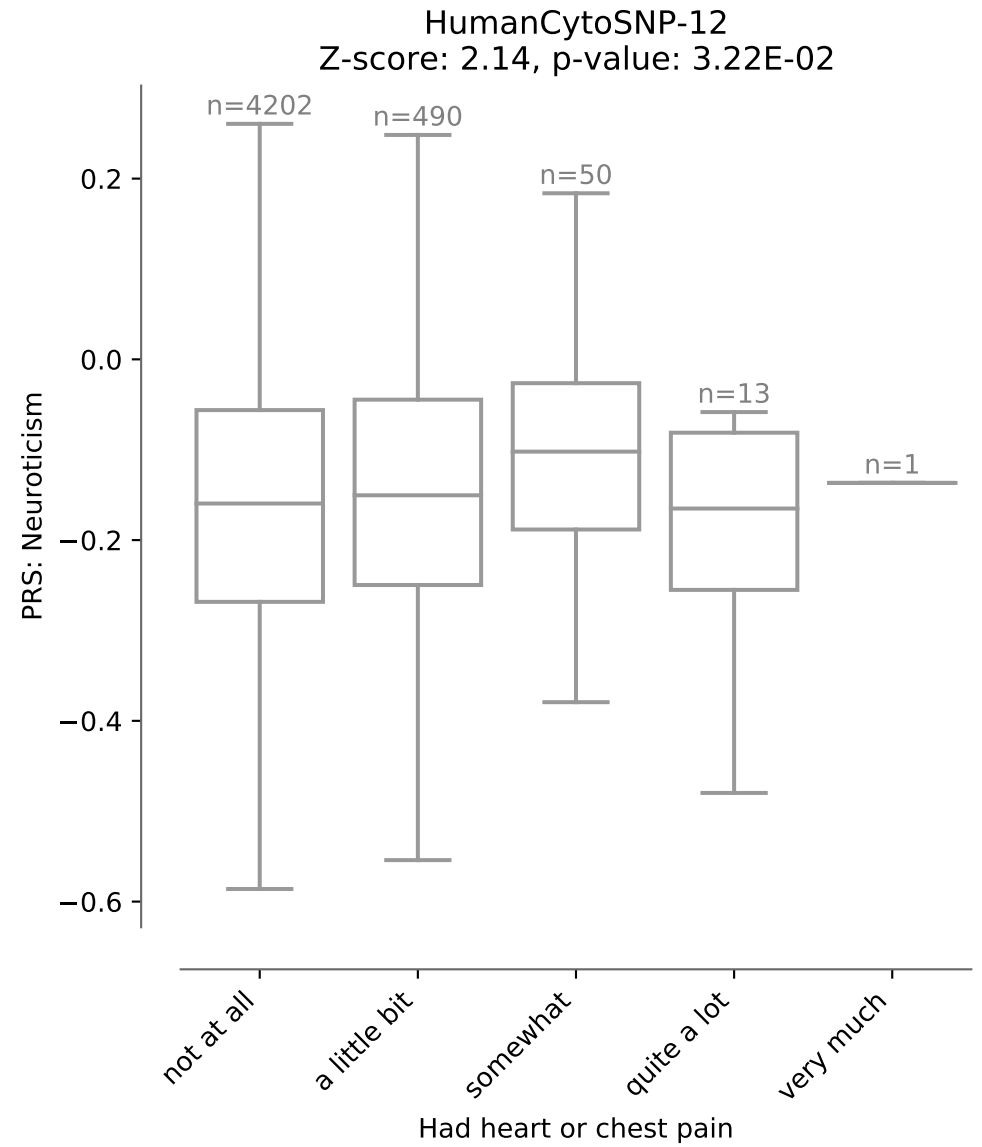



Had heart or chest pain  
PGS: Schizophrenia  
Meta analysis Z-score: 5.66, p-value: 1.48E-08

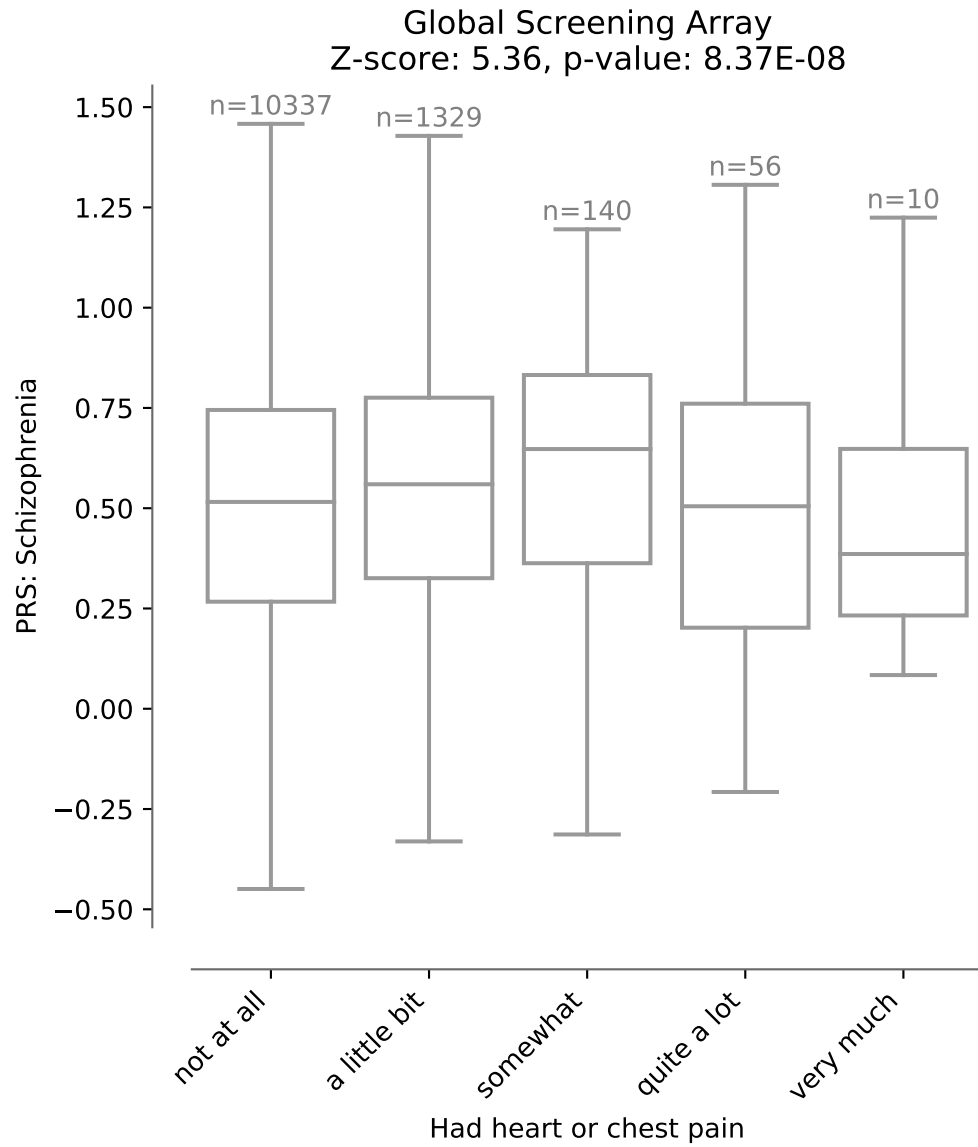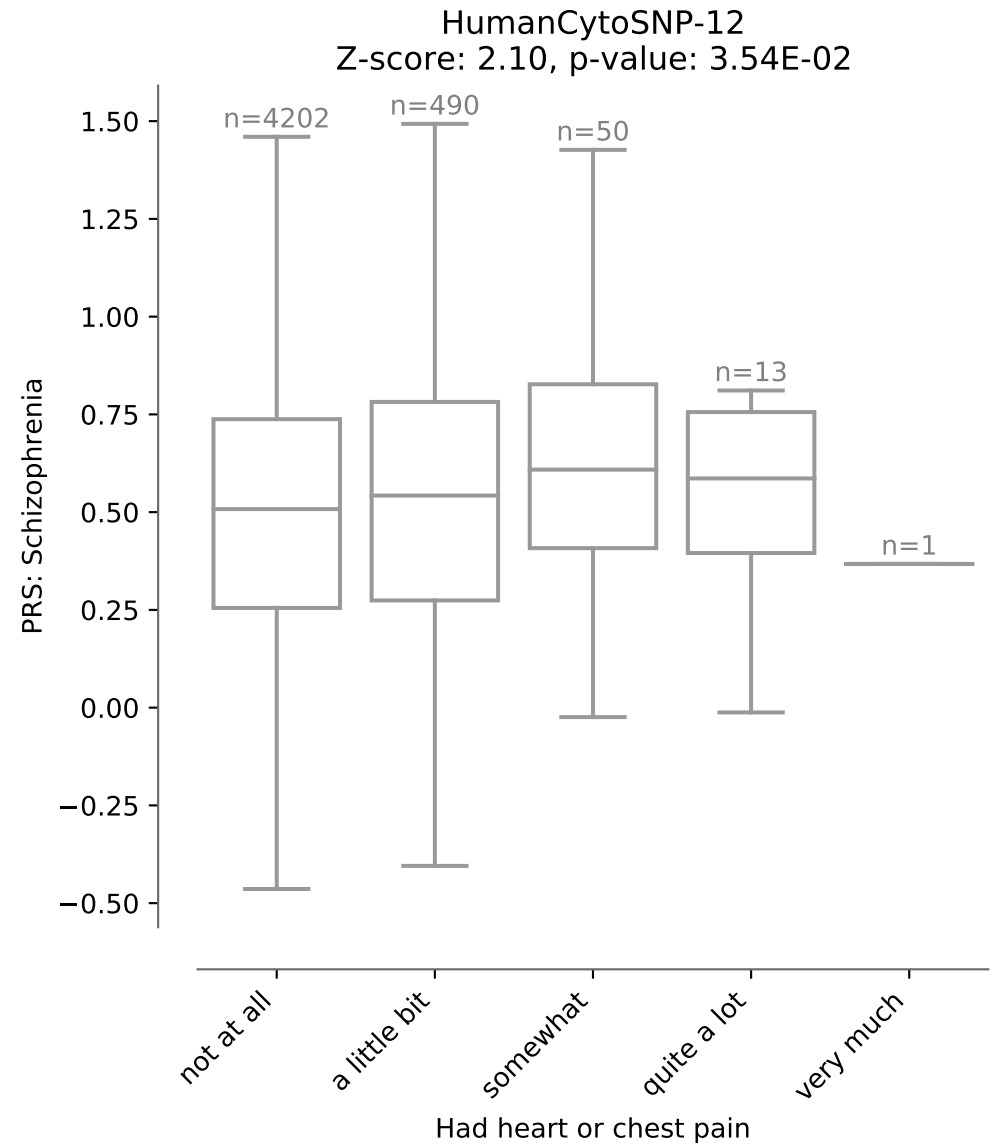

Had pain in neck, shoulder(s) or arm(s)  
PGS: Depression  
Meta analysis Z-score: 7.46, p-value: 8.85E-14

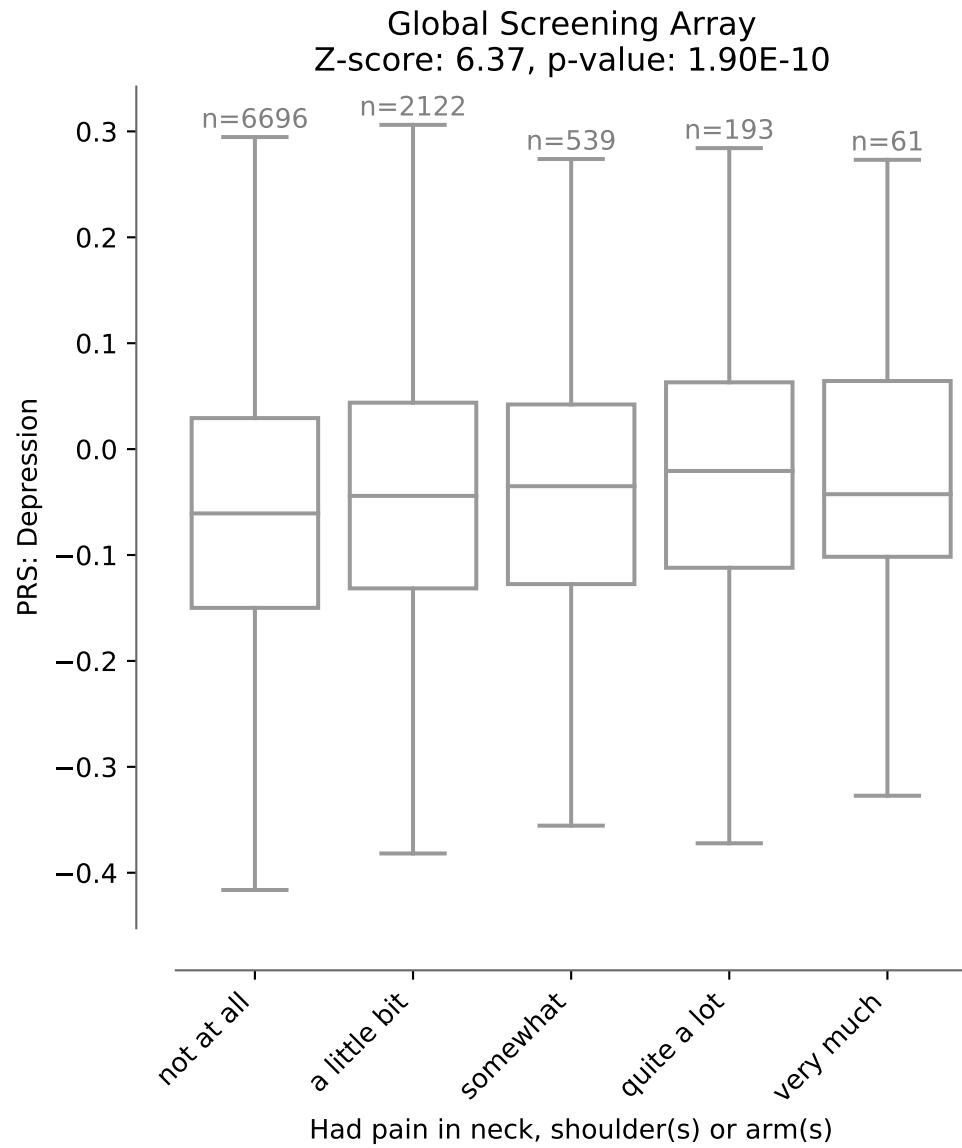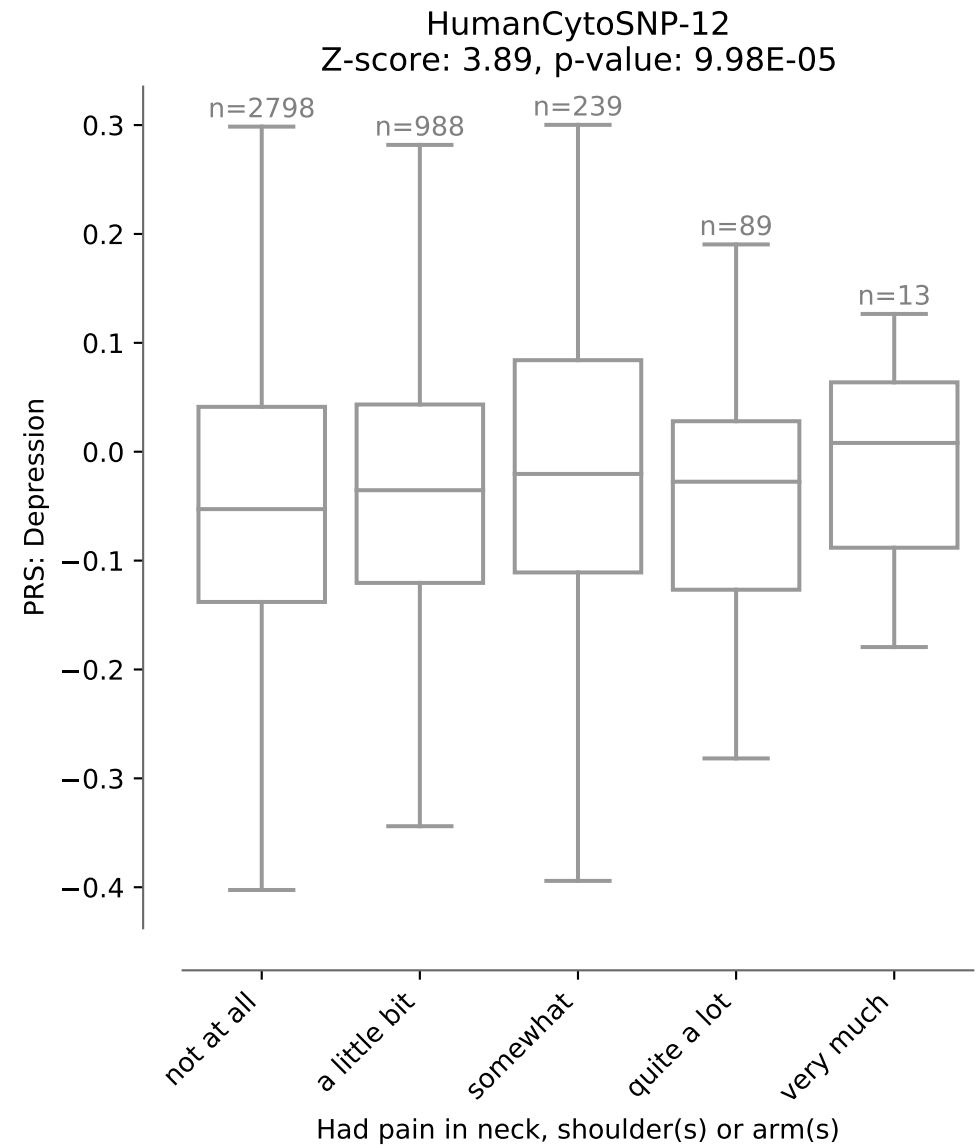

Had pain in neck, shoulder(s) or arm(s)  
PGS: Life satisfaction  
Meta analysis Z-score: -8.97, p-value: 3.08E-19

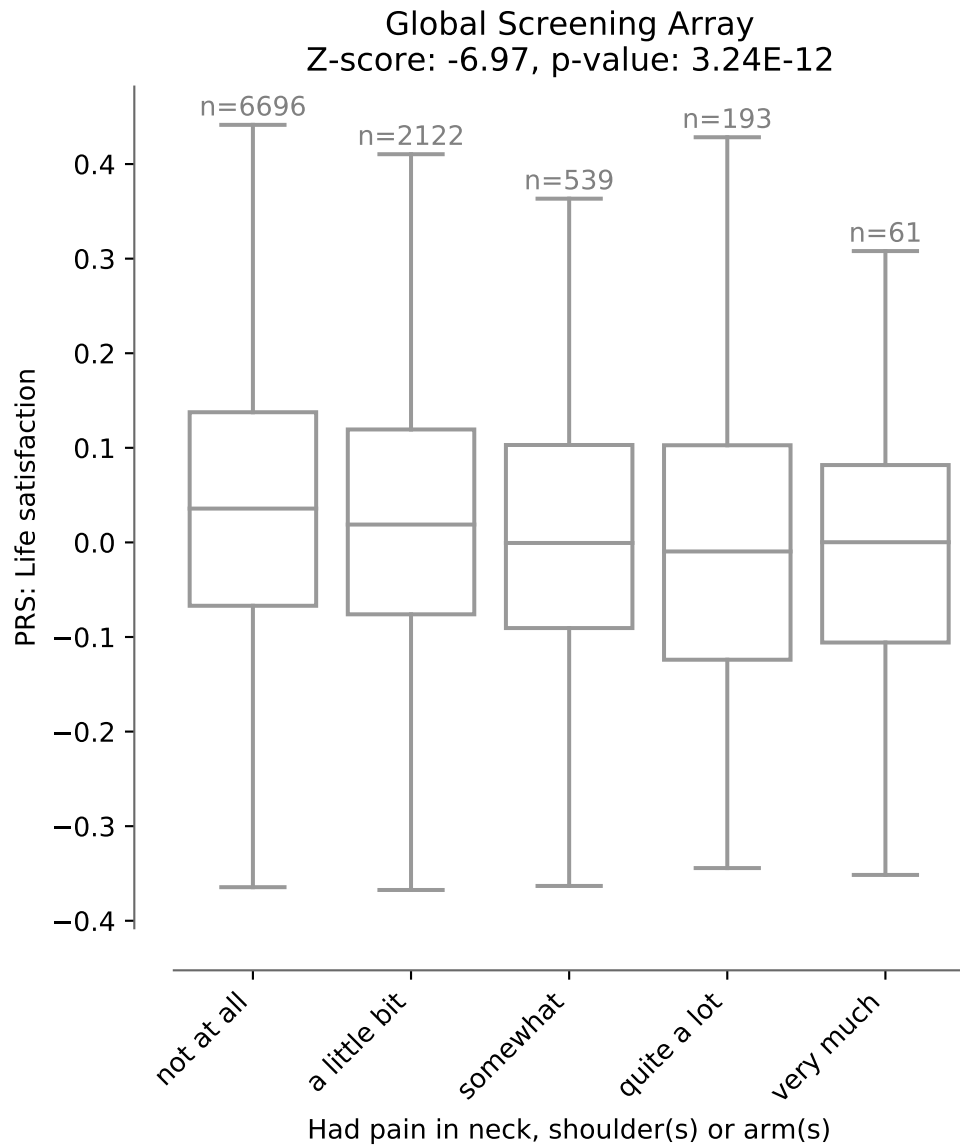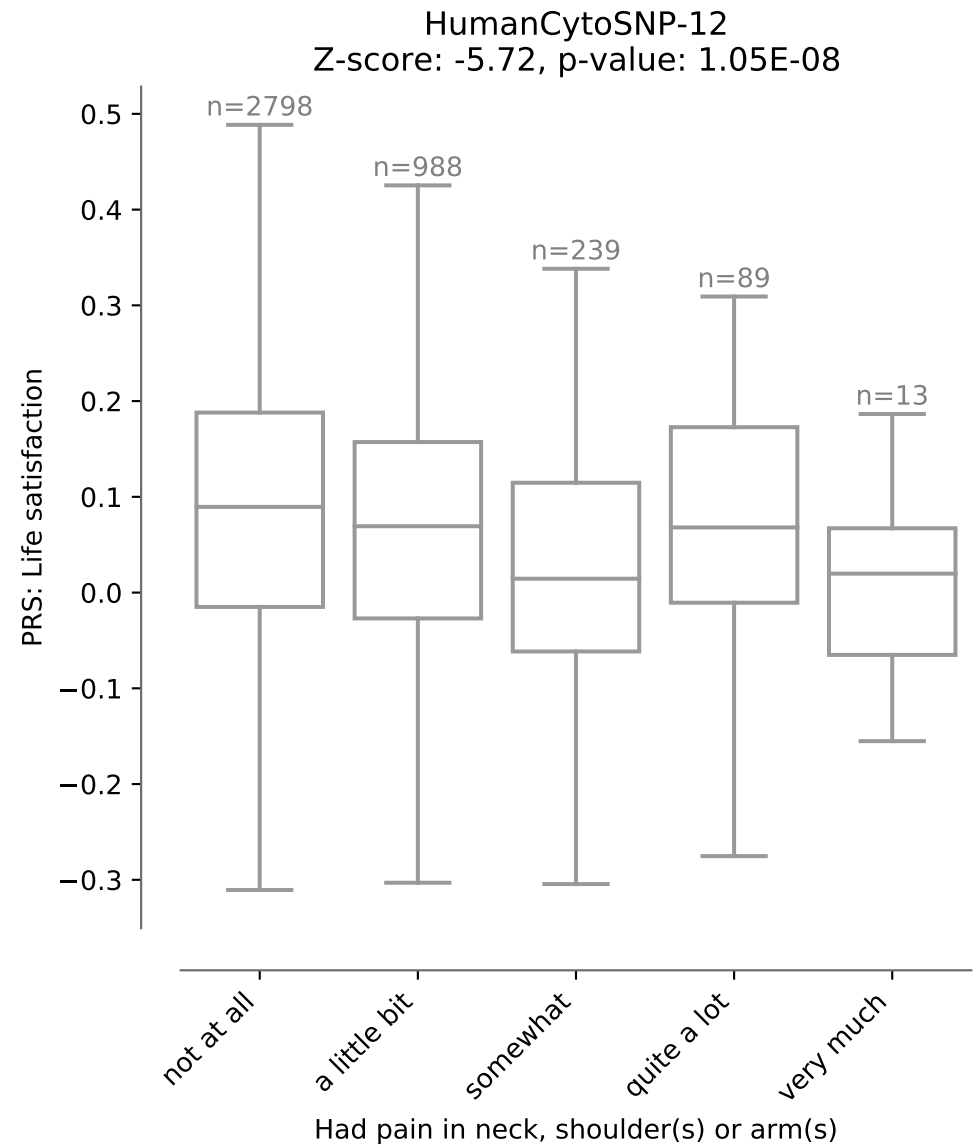

Had pain in neck, shoulder(s) or arm(s)  
PGS: Neuroticism  
Meta analysis Z-score: 7.00, p-value: 2.48E-12

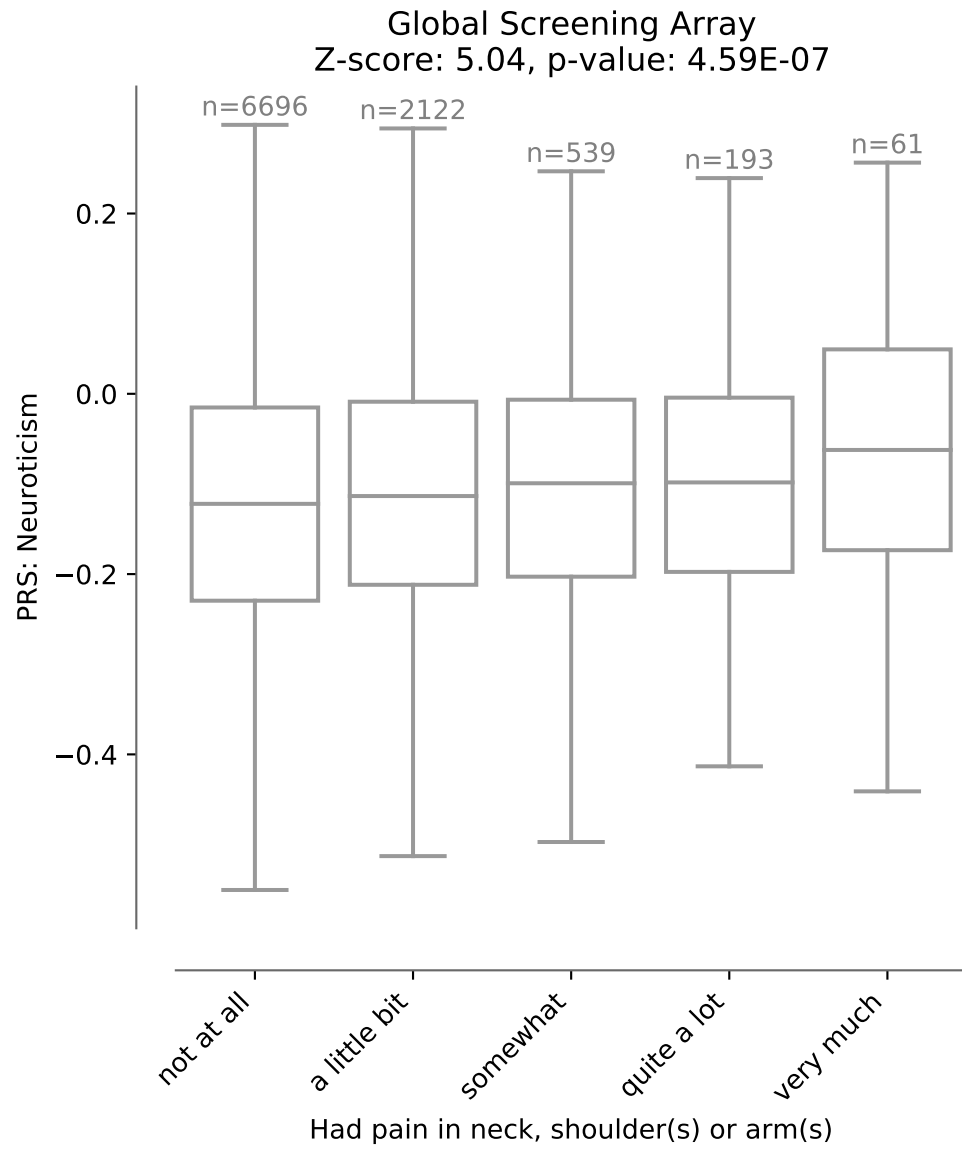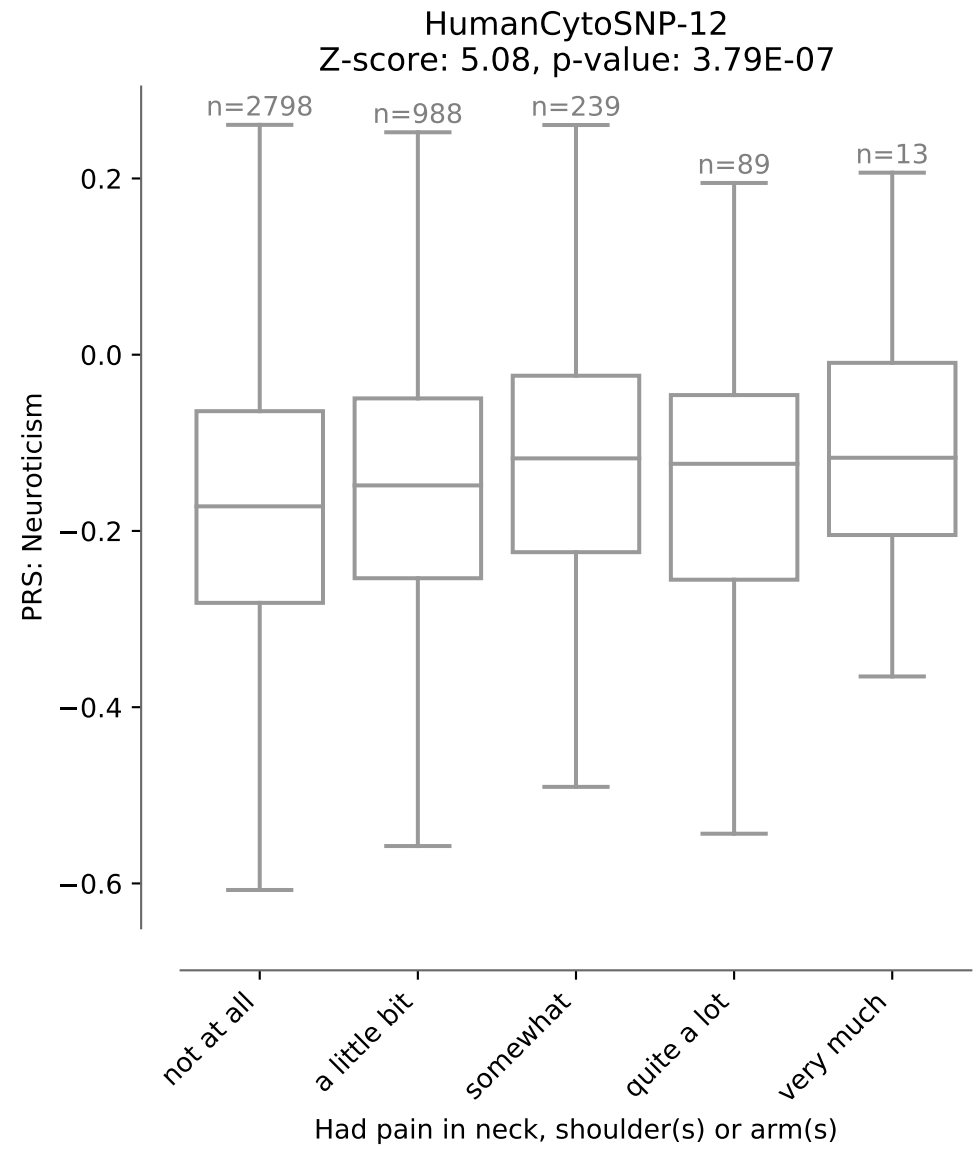

Had pain in lower back  
PGS: Life satisfaction  
Meta analysis Z-score: -6.03, p-value: 1.64E-09

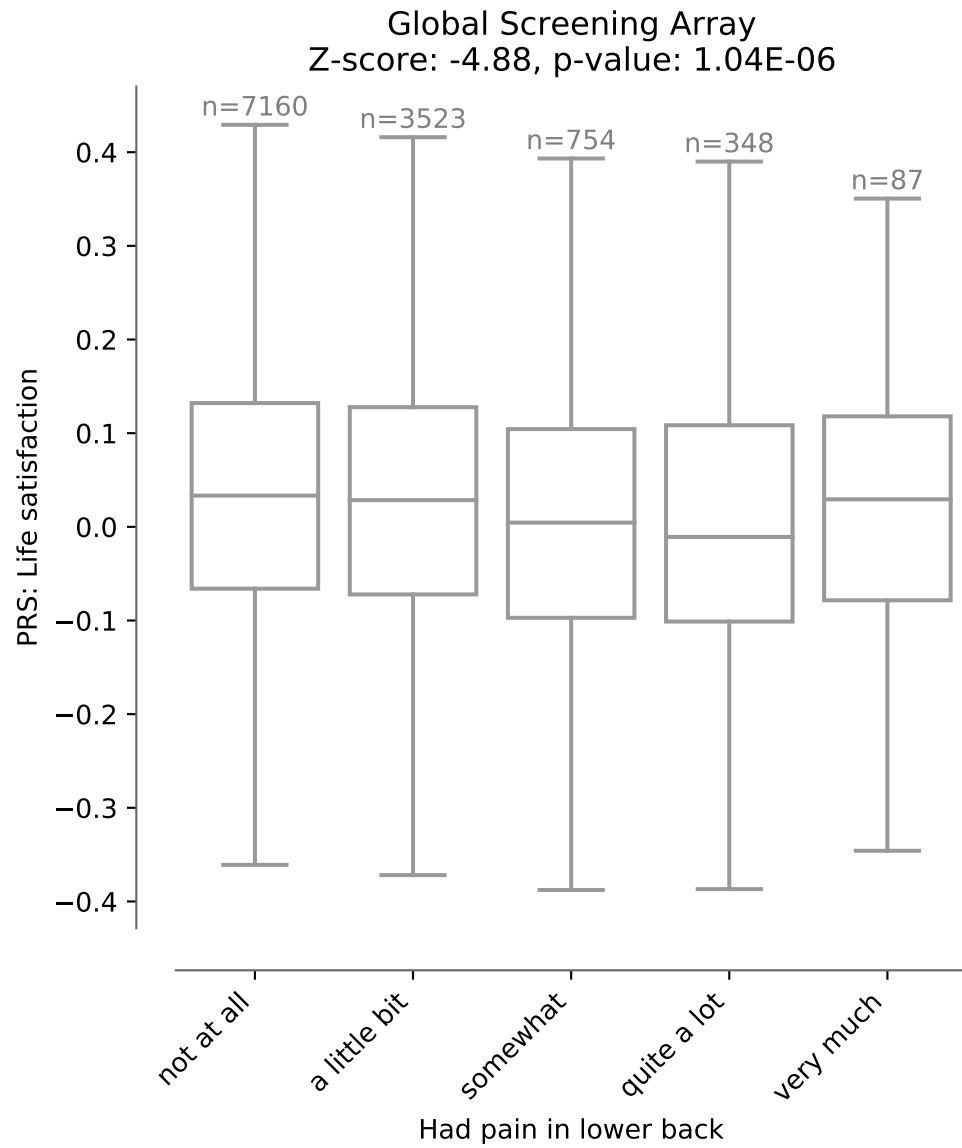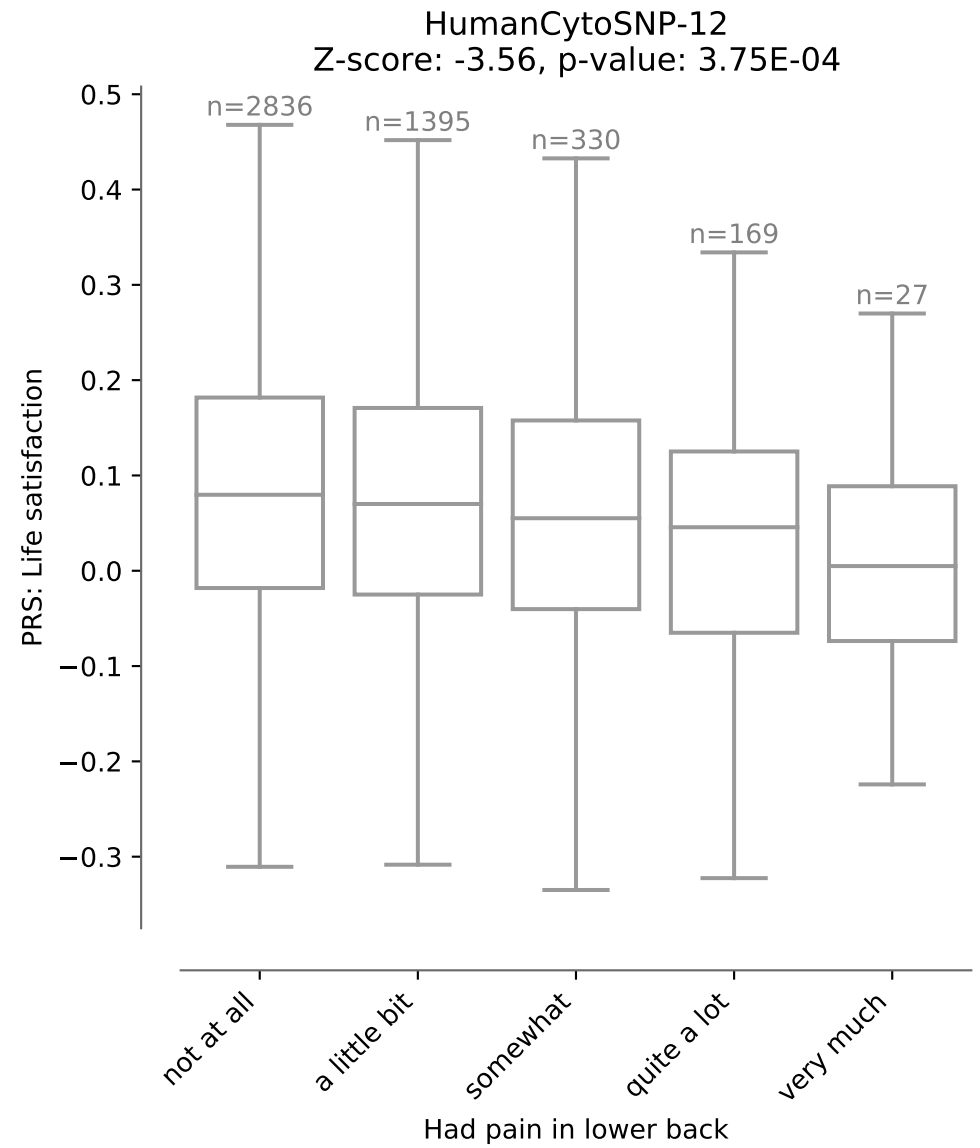

Had pain in lower back  
PGS: Neuroticism  
Meta analysis Z-score: 4.63, p-value: 3.66E-06

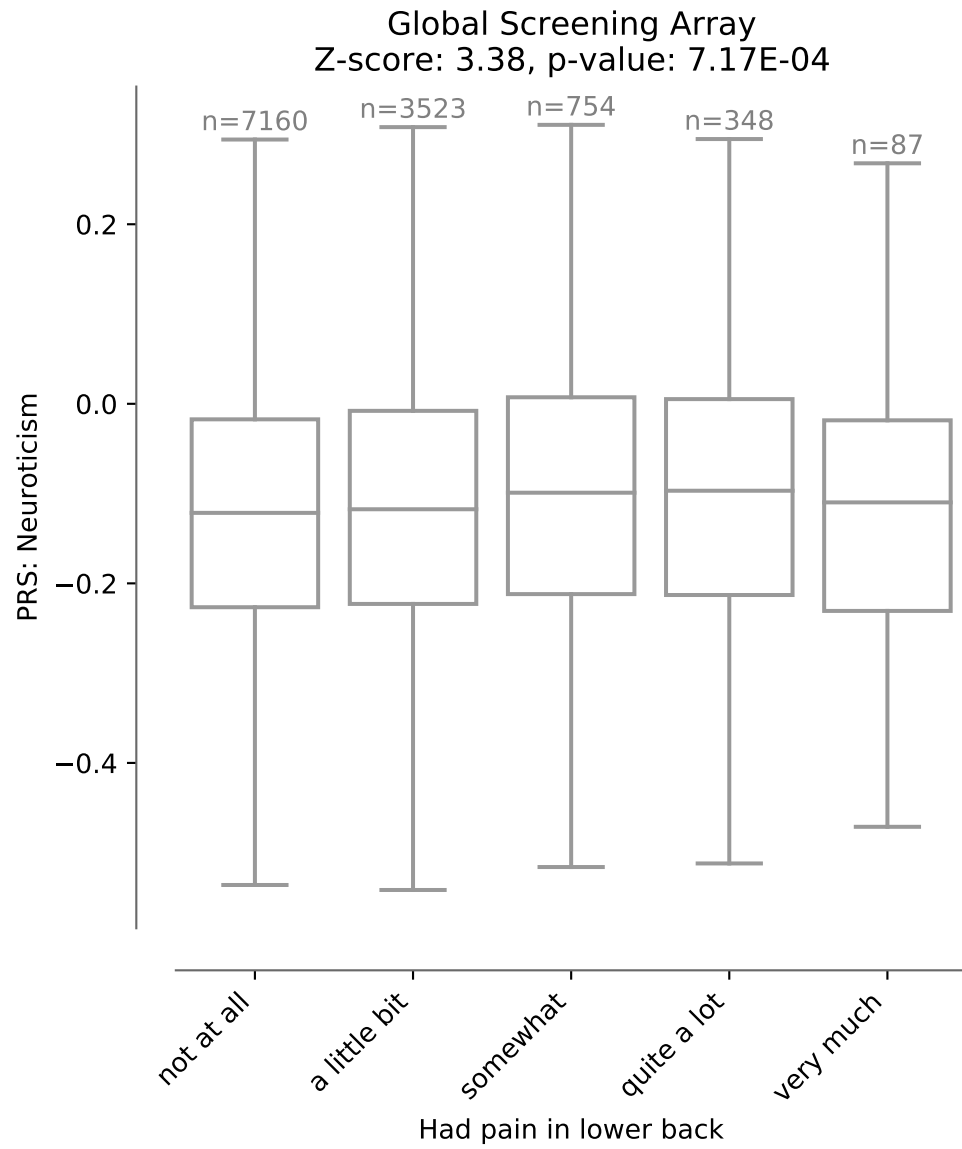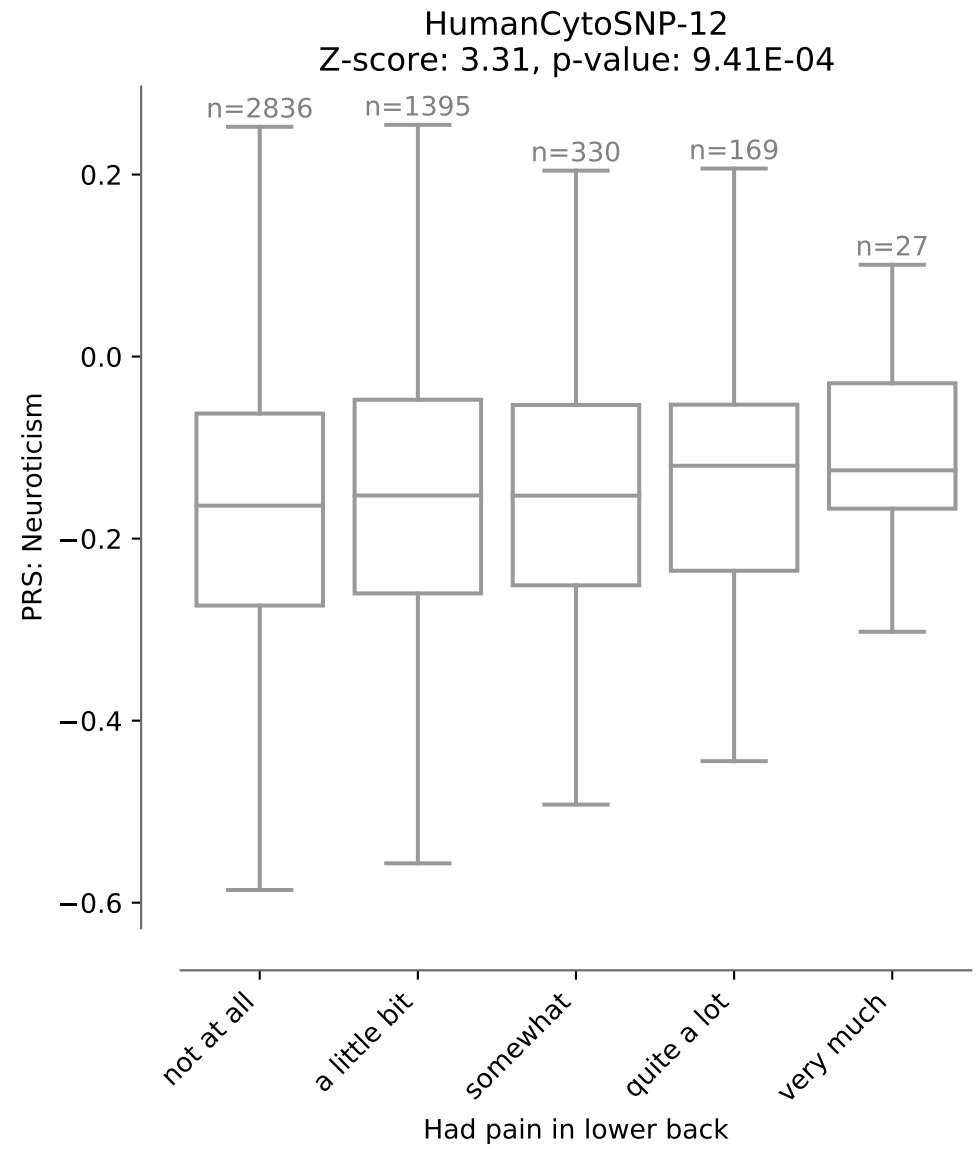

Had muscle pain  
PGS: Depression  
Meta analysis Z-score: 5.38, p-value: 7.45E-08

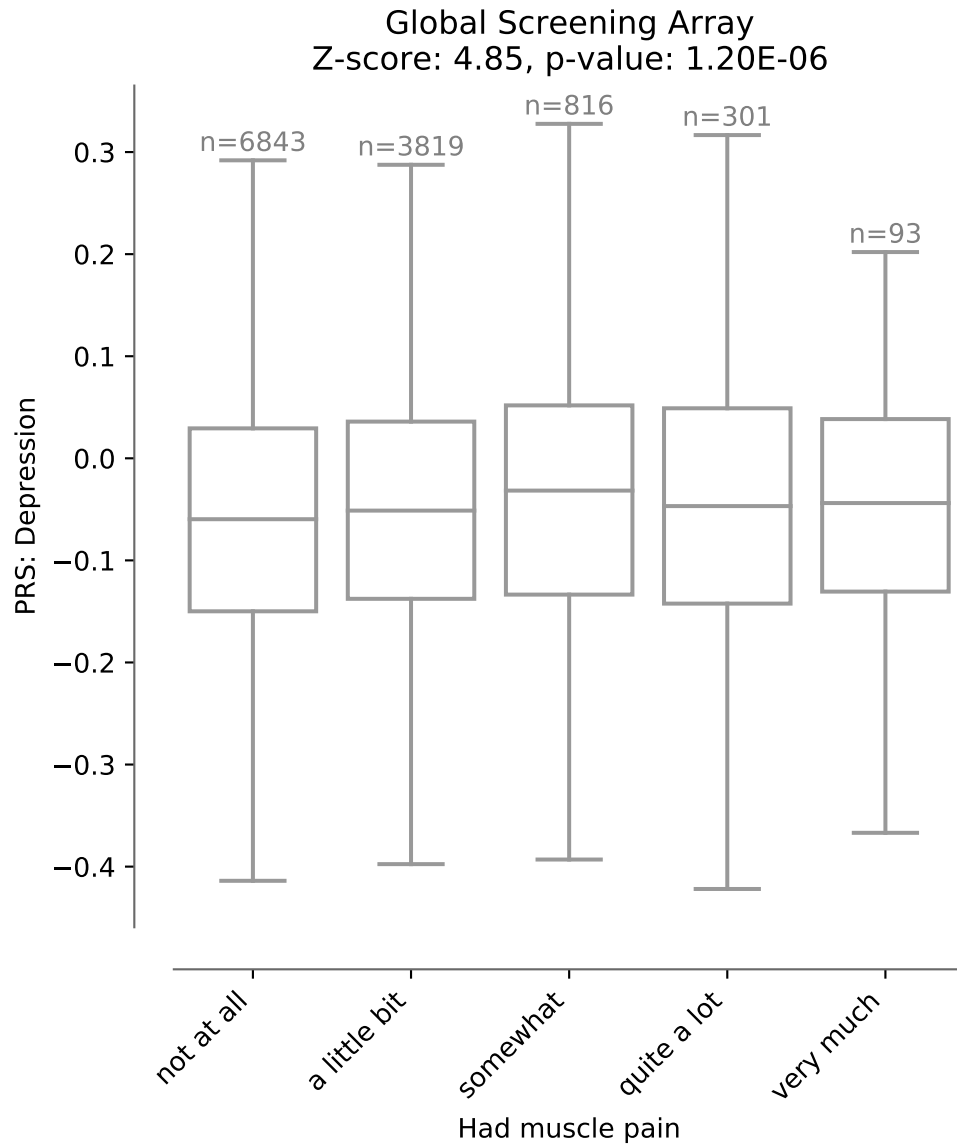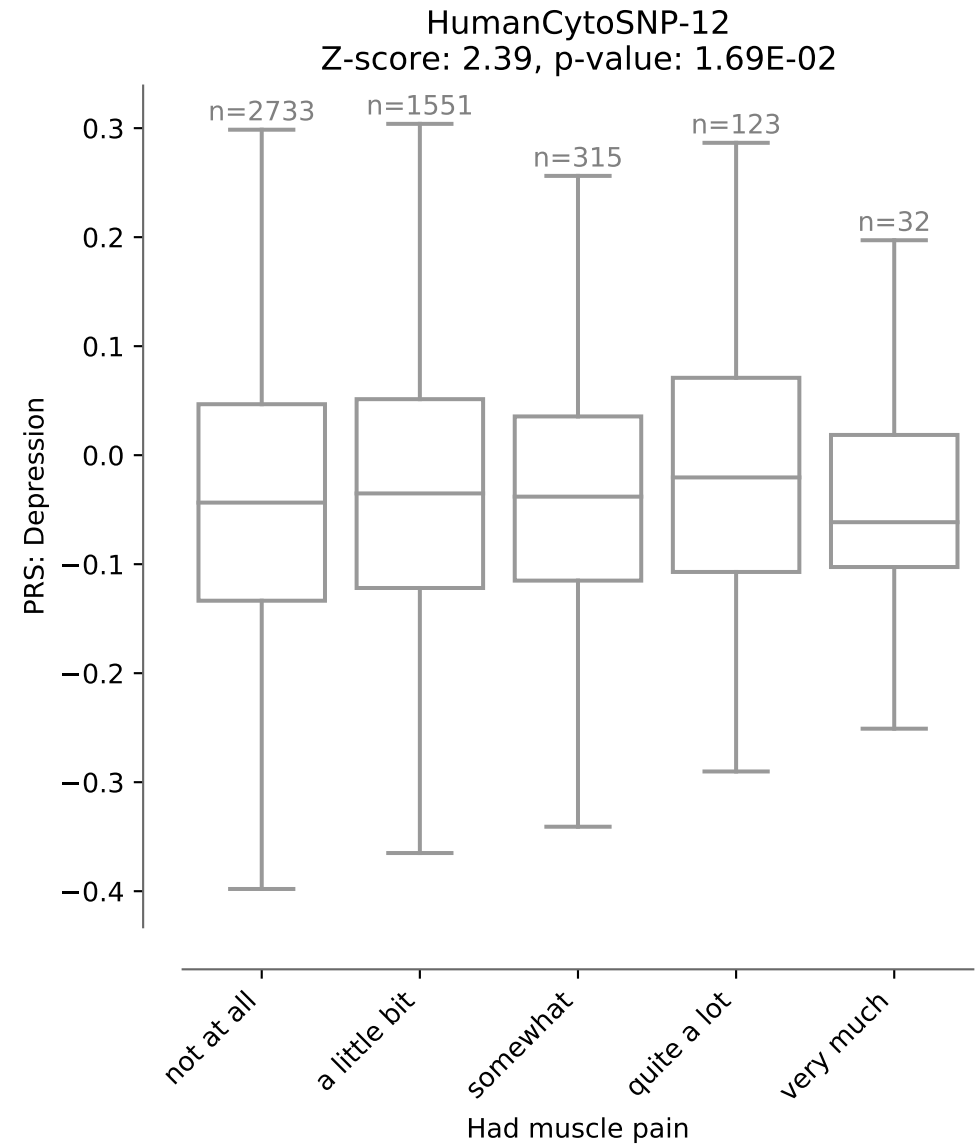

Had muscle pain  
PGS: Educational attainment  
Meta analysis Z-score: -4.69, p-value: 2.67E-06

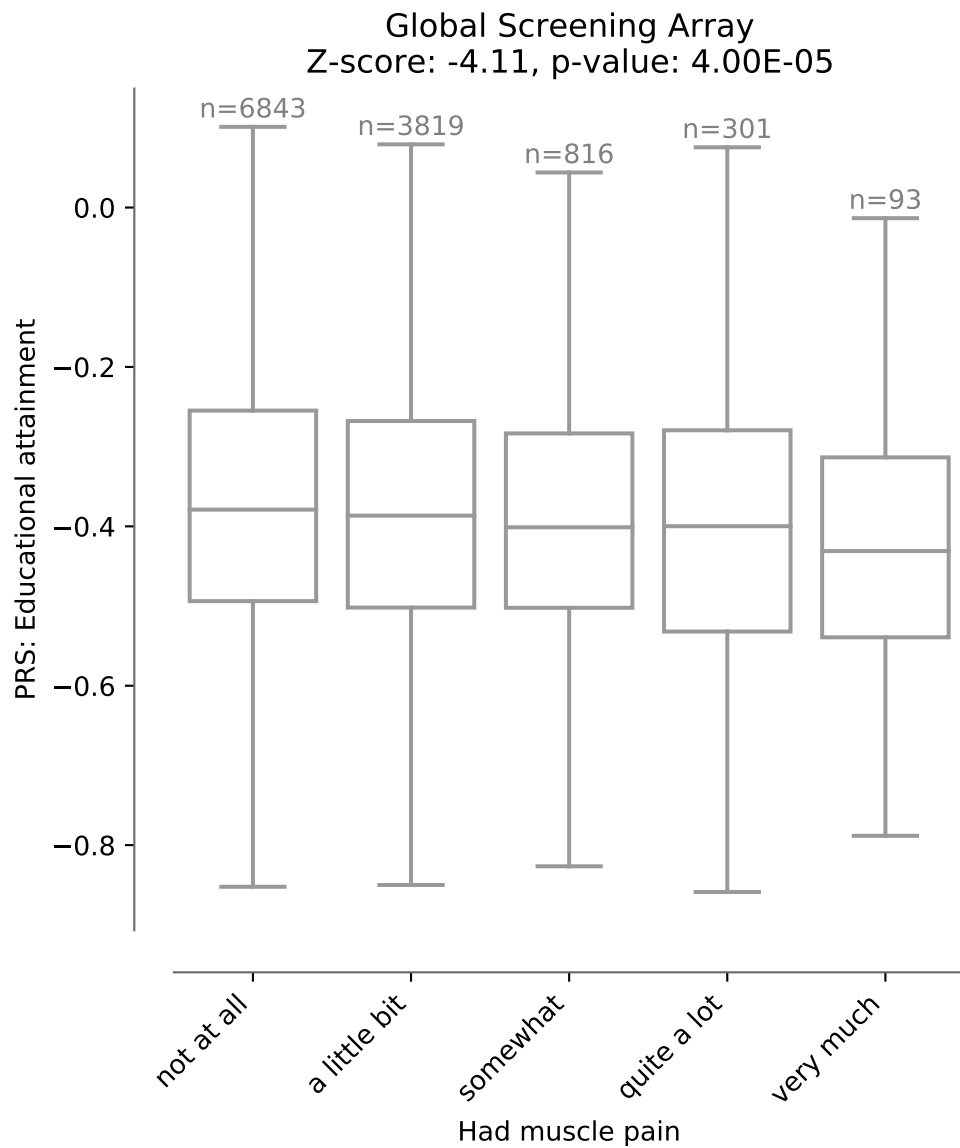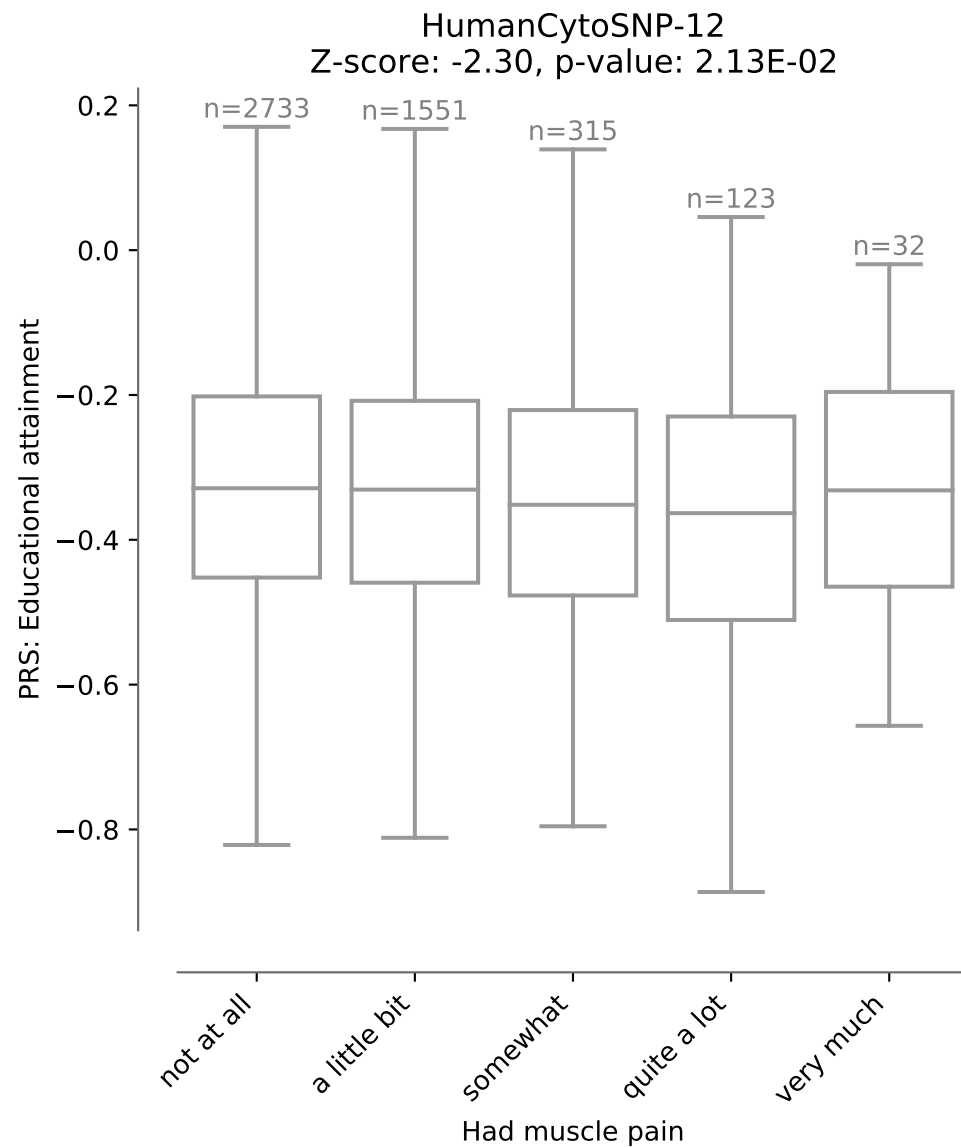



Had muscle pain  
PGS: Life satisfaction  
Meta analysis Z-score: -7.81, p-value: 5.52E-15

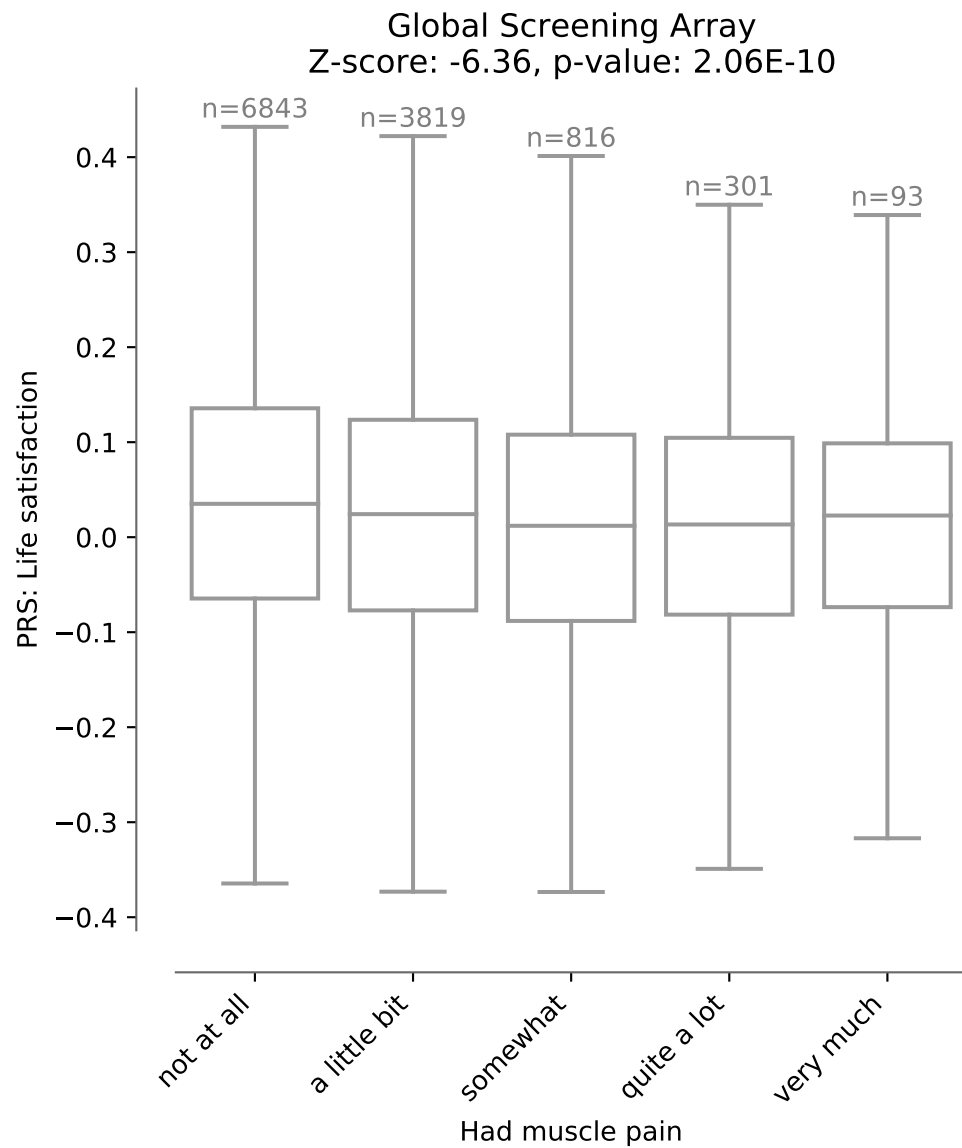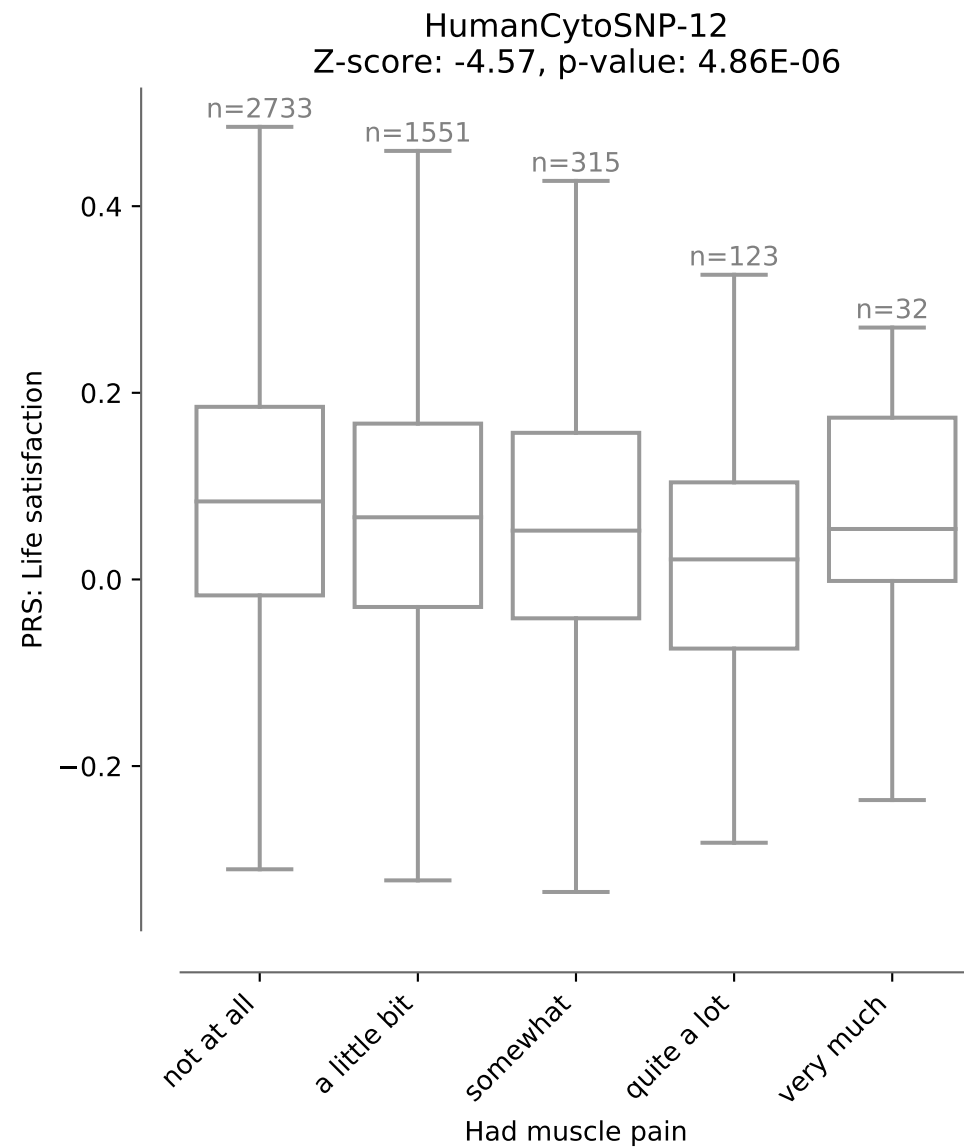

Had muscle pain  
PGS: Neuroticism  
Meta analysis Z-score: 7.10, p-value: 1.27E-12

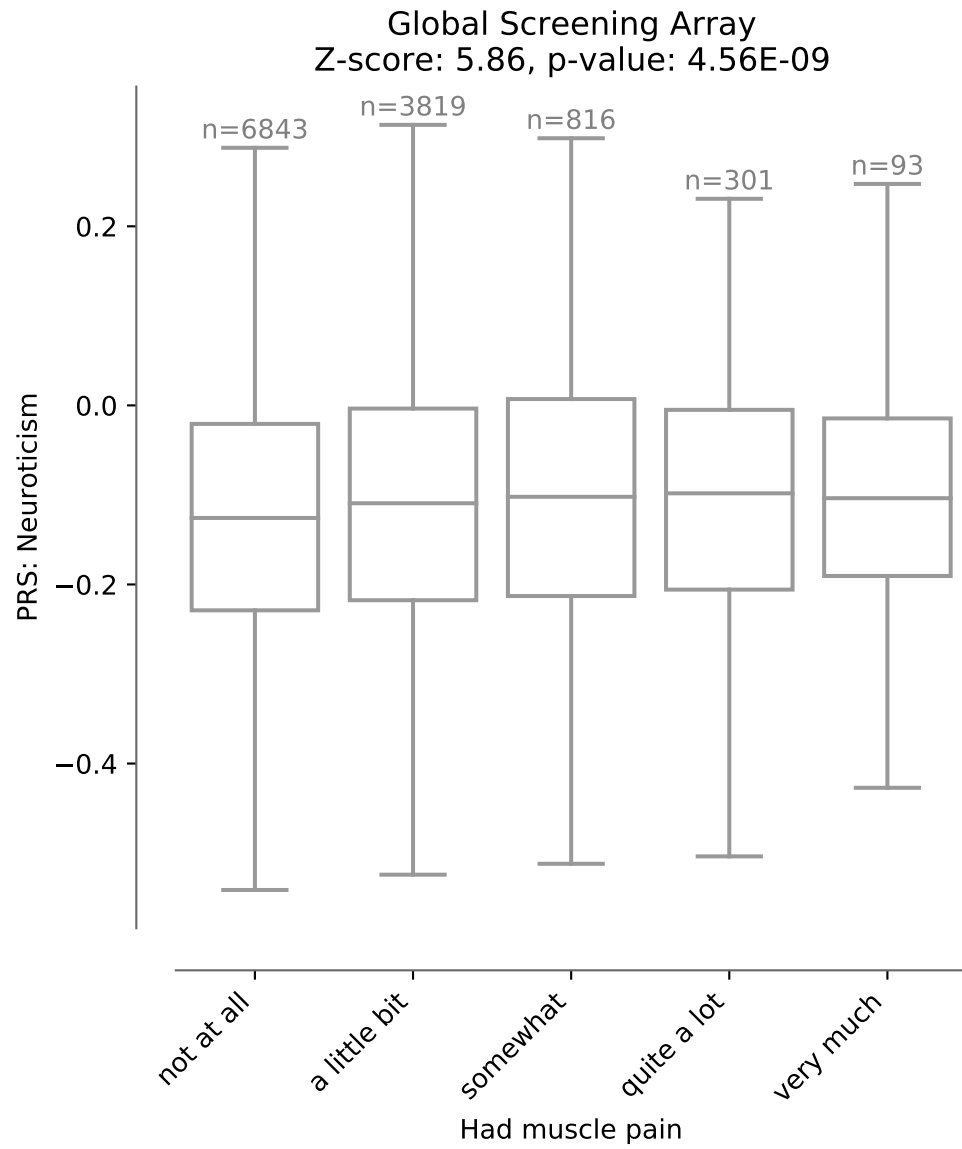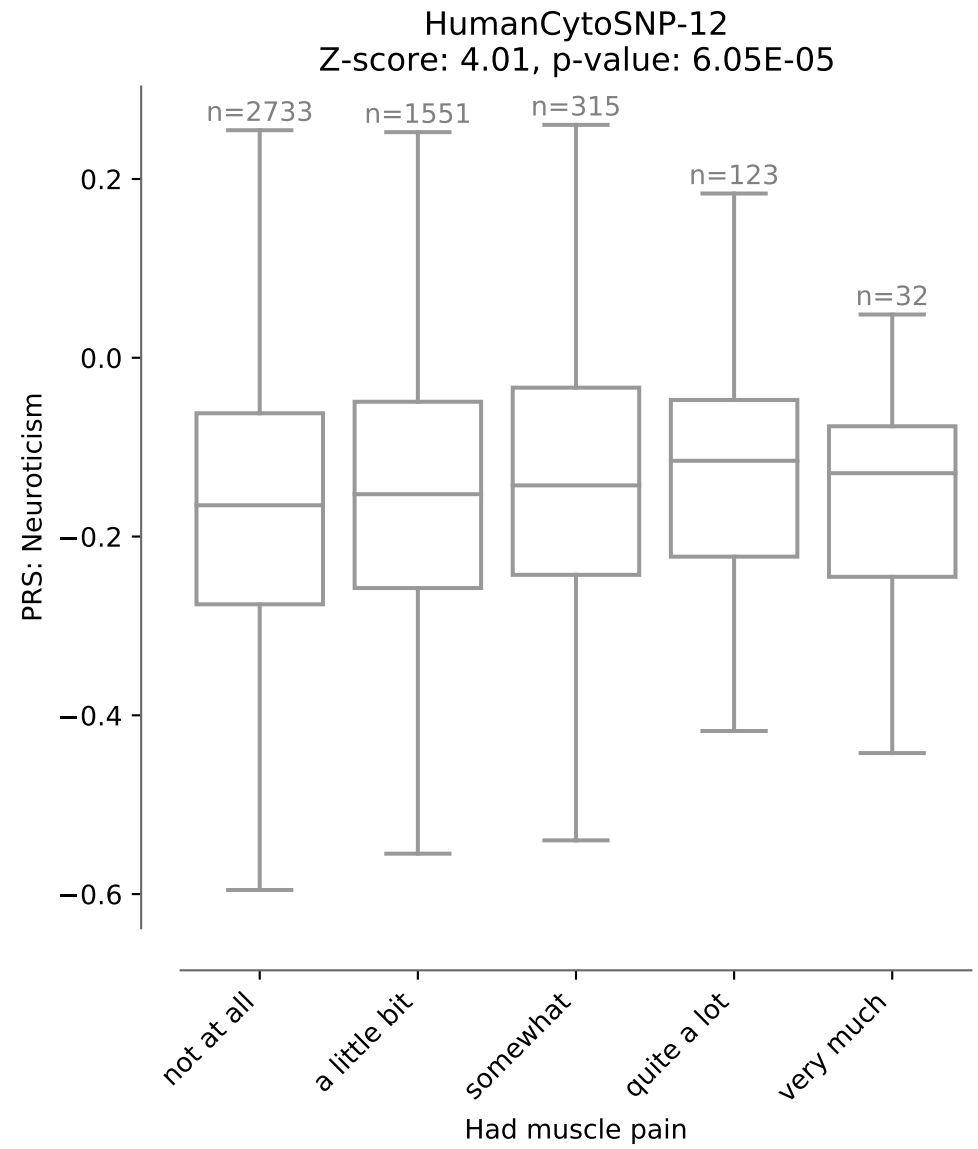

Had muscle pain  
PGS: Schizophrenia  
Meta analysis Z-score: 4.96, p-value: 7.20E-07

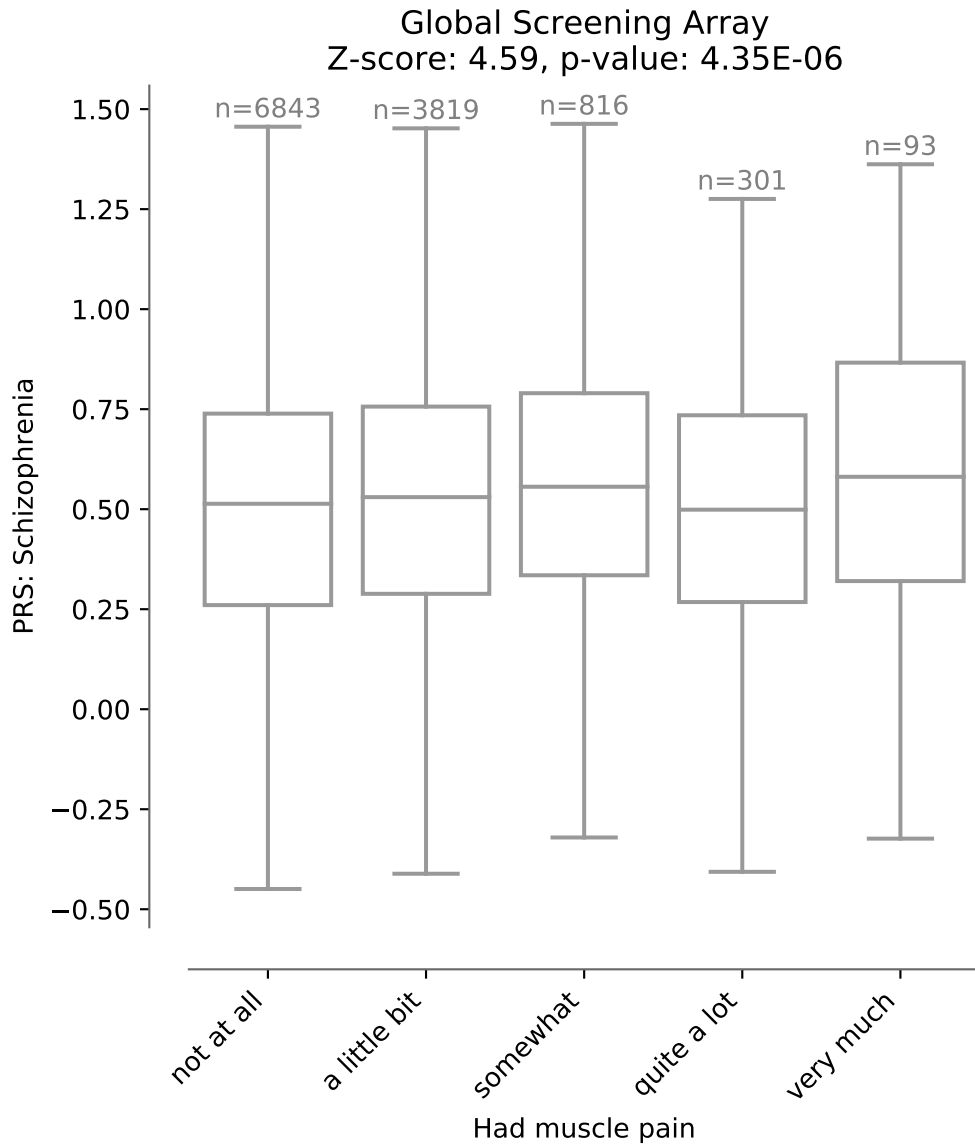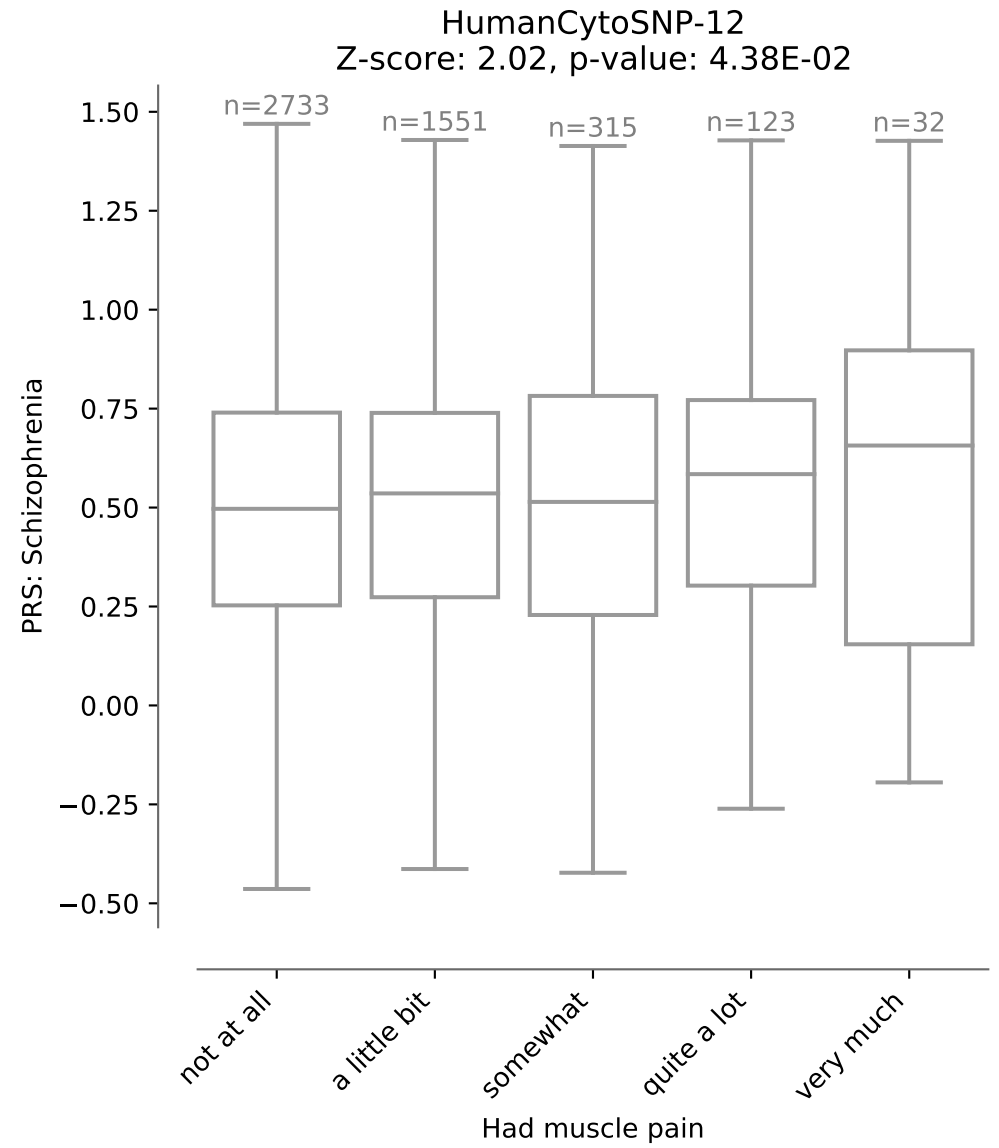

Spoke or moved slower than normal  
PGS: Life satisfaction  
Meta analysis Z-score: -4.82, p-value: 1.45E-06

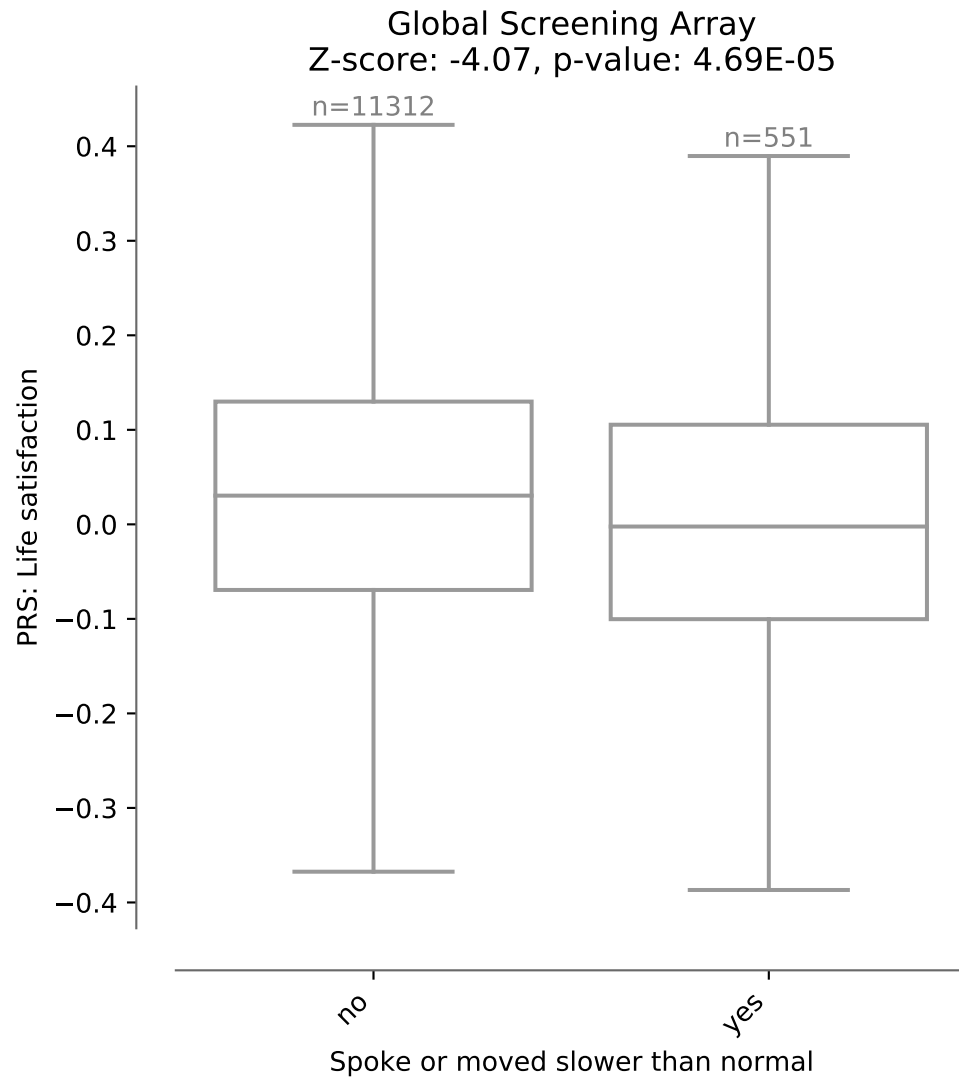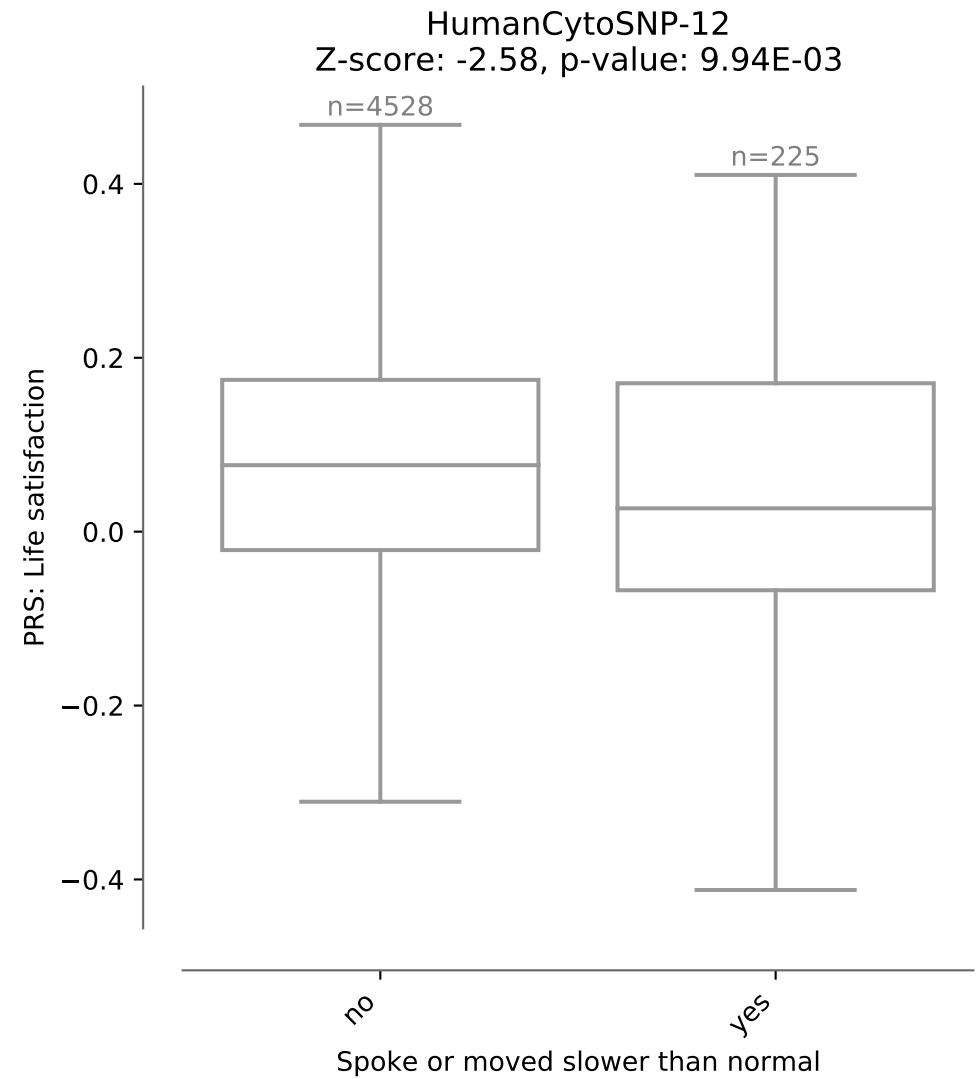

Perceiving others as a threat to personal well-being  
PGS: Educational attainment  
Meta analysis Z-score: -7.44, p-value: 9.79E-14

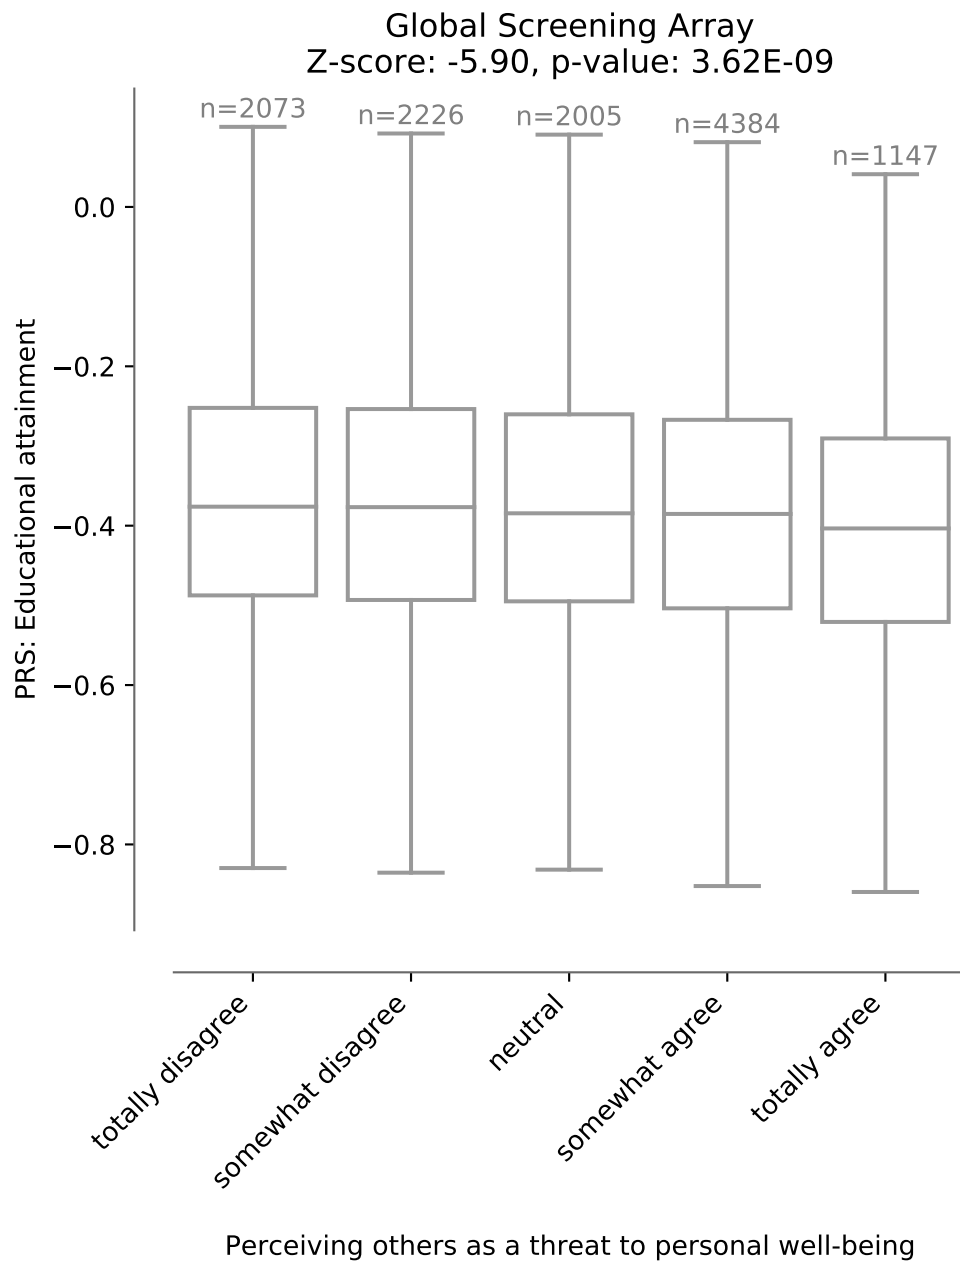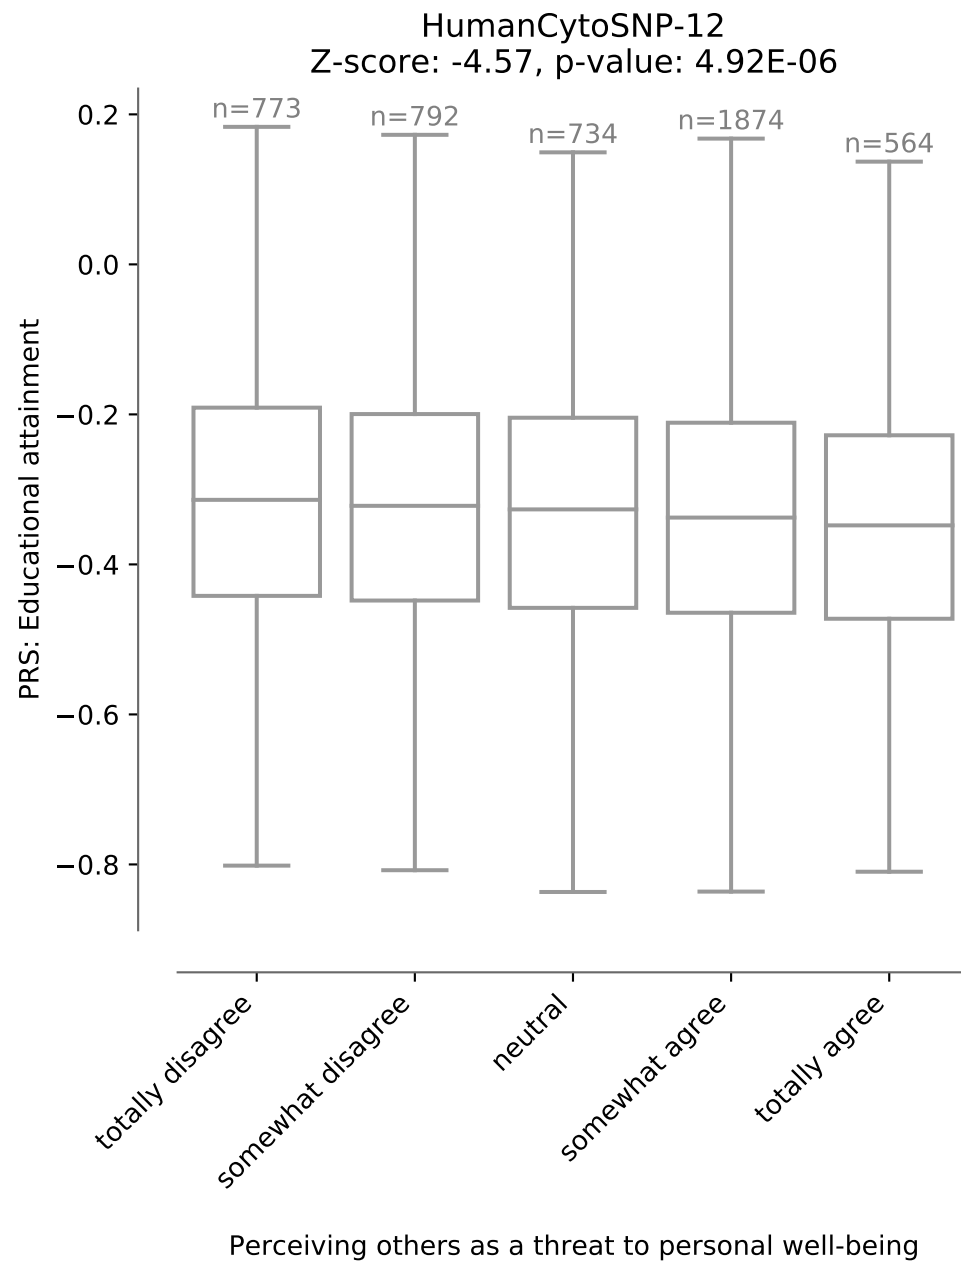

Perceiving others as a threat to personal well-being

PGS: Neuroticism

Meta analysis Z-score: 5.41, p-value: 6.46E-08

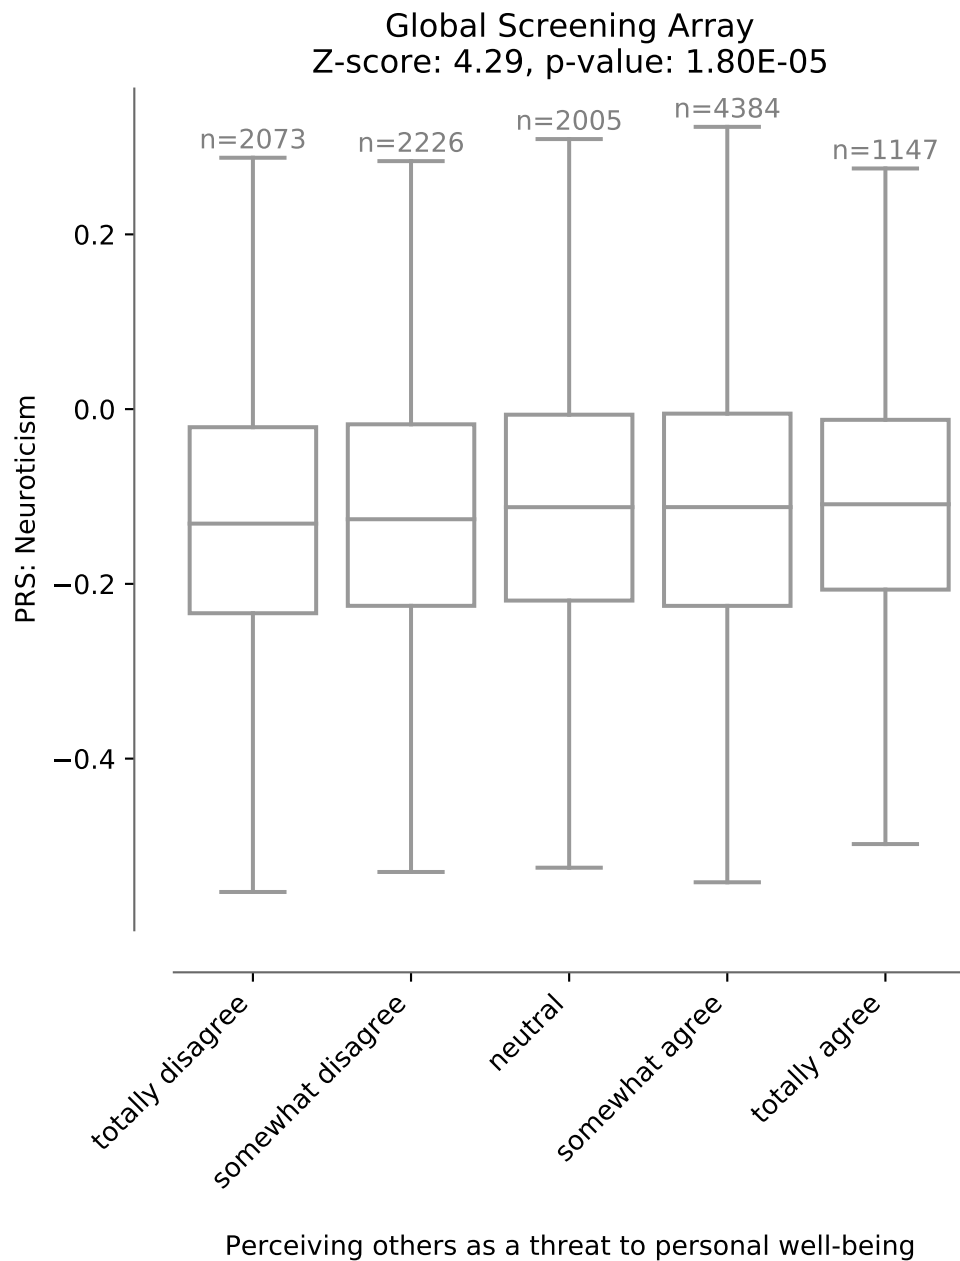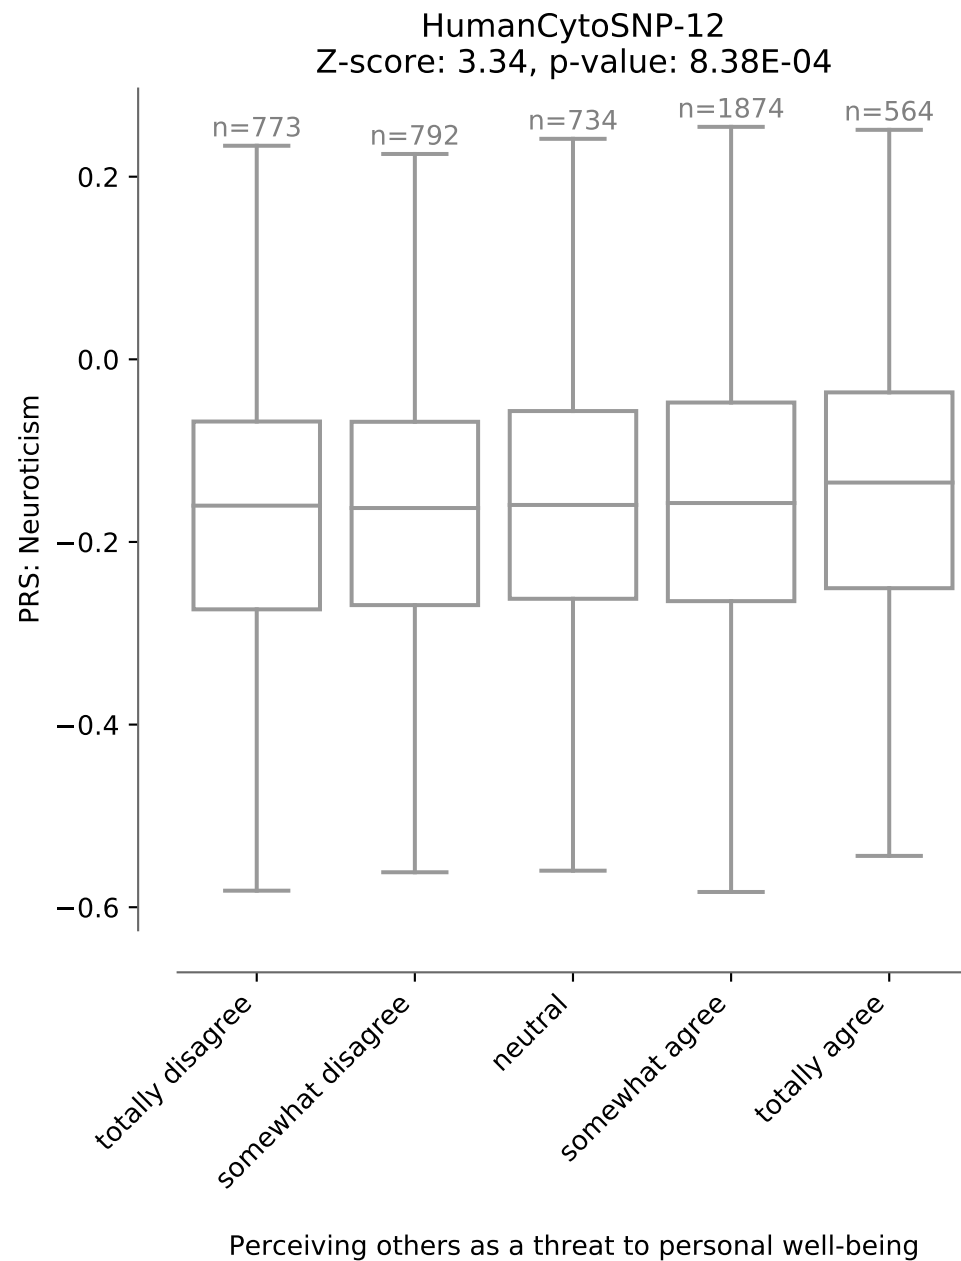

Being able to comply with the 1.5 meter rule when visited at home

PGS: Educational attainment

Meta analysis Z-score: -4.52, p-value: 6.20E-06

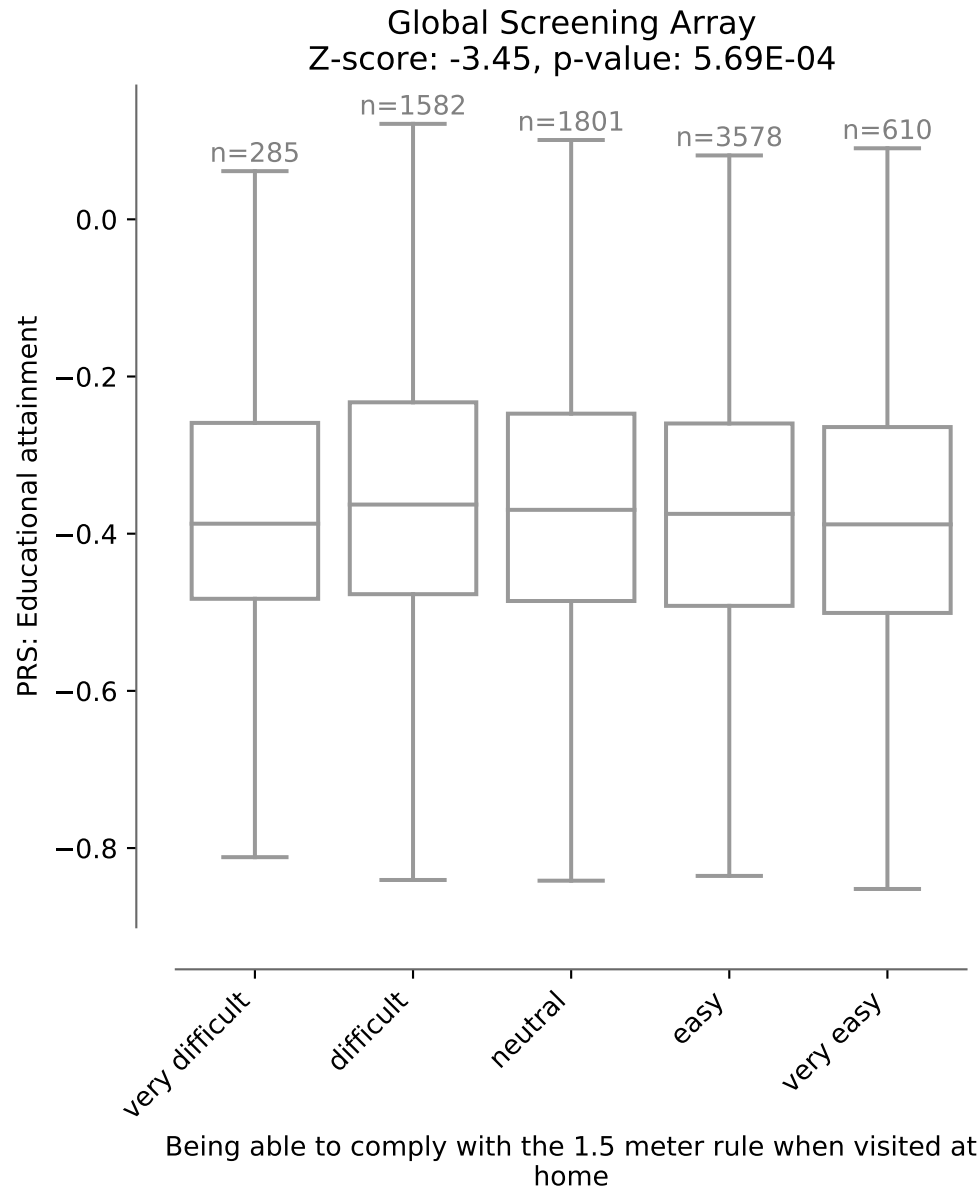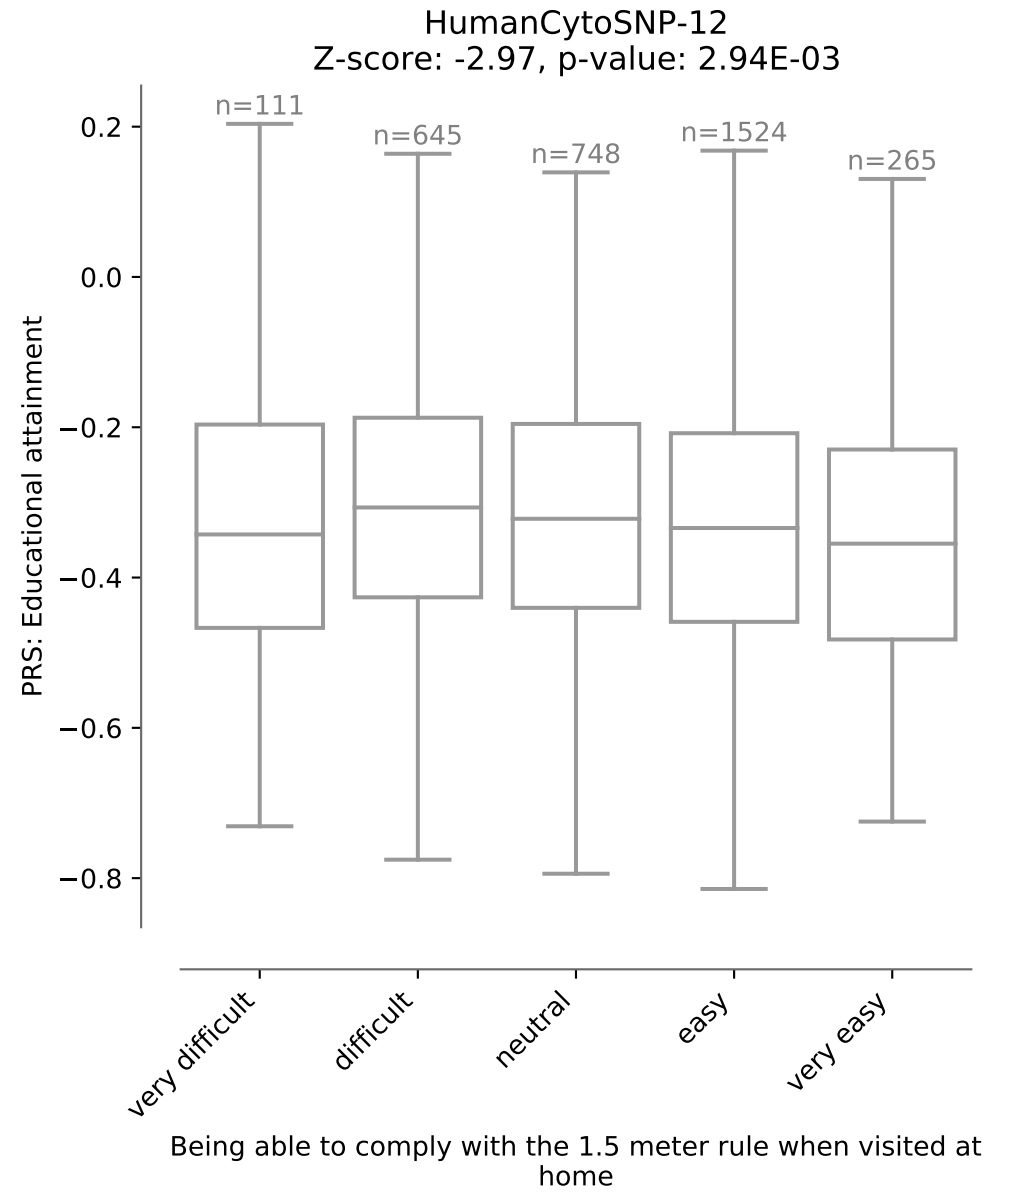

Being irritable  
PGS: Life satisfaction  
Meta analysis Z-score: -7.05, p-value: 1.78E-12

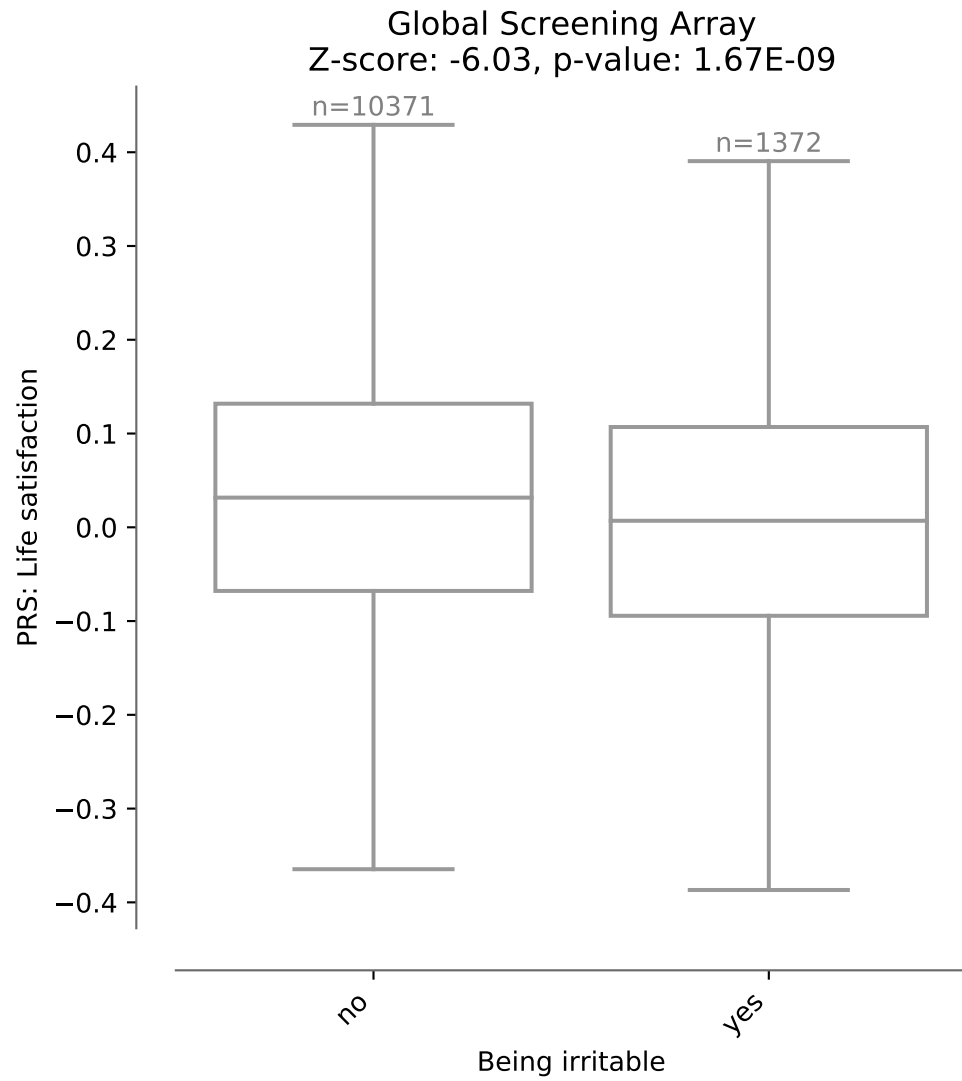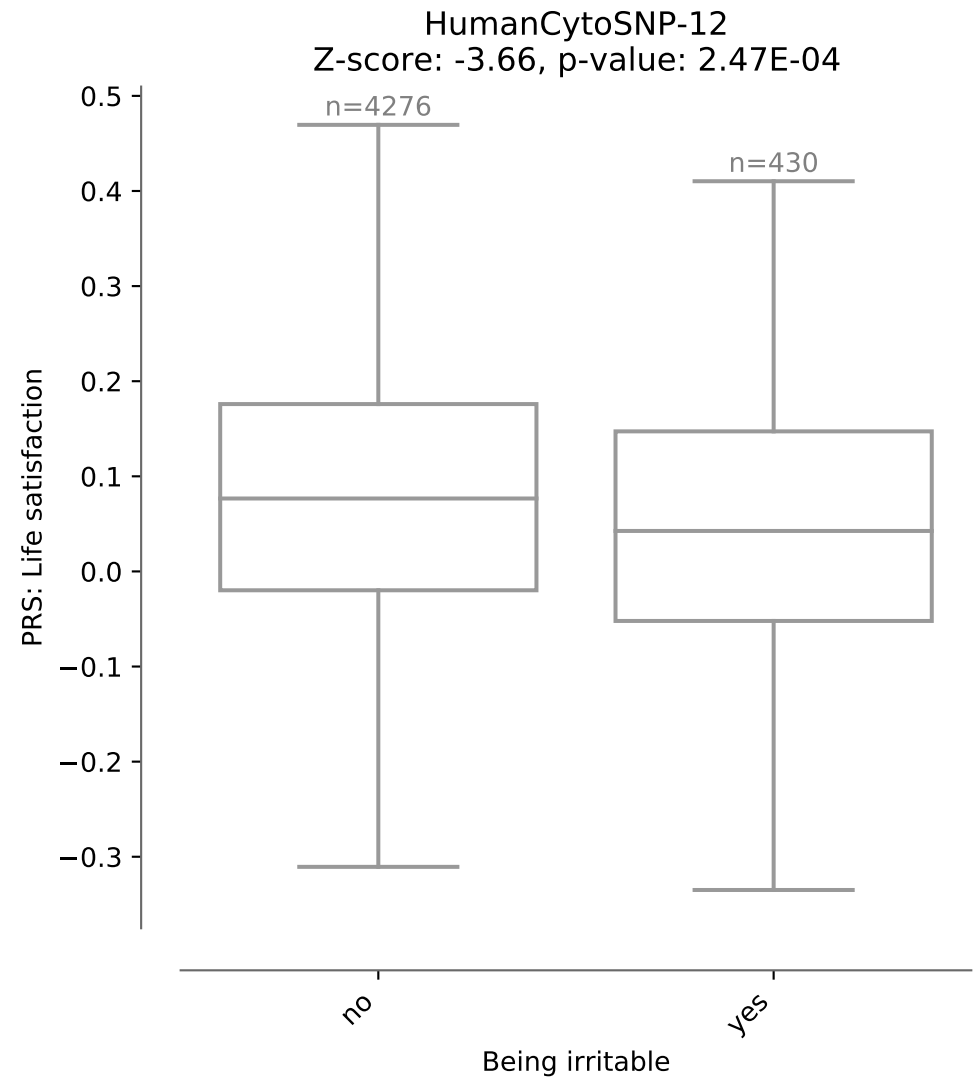



Being irritable  
PGS: Neuroticism  
Meta analysis Z-score: 5.36, p-value: 8.18E-08

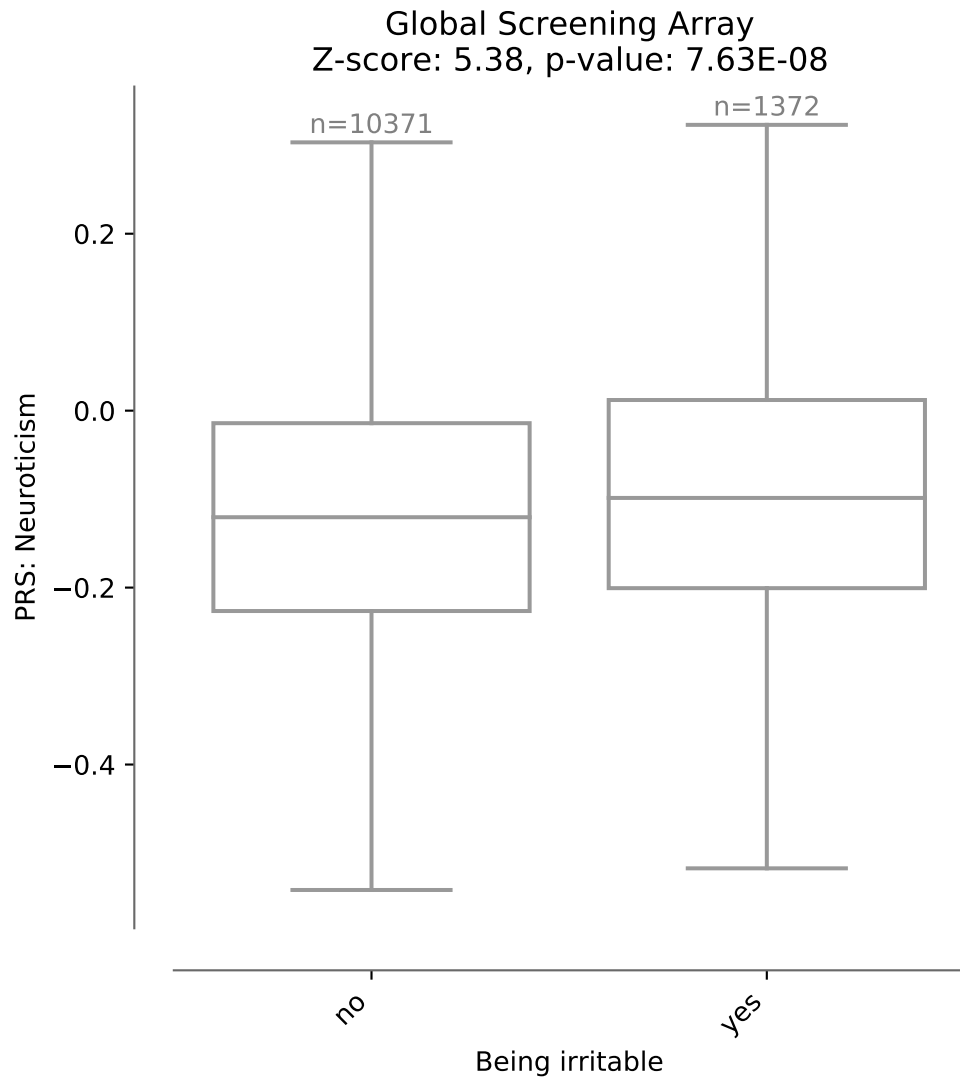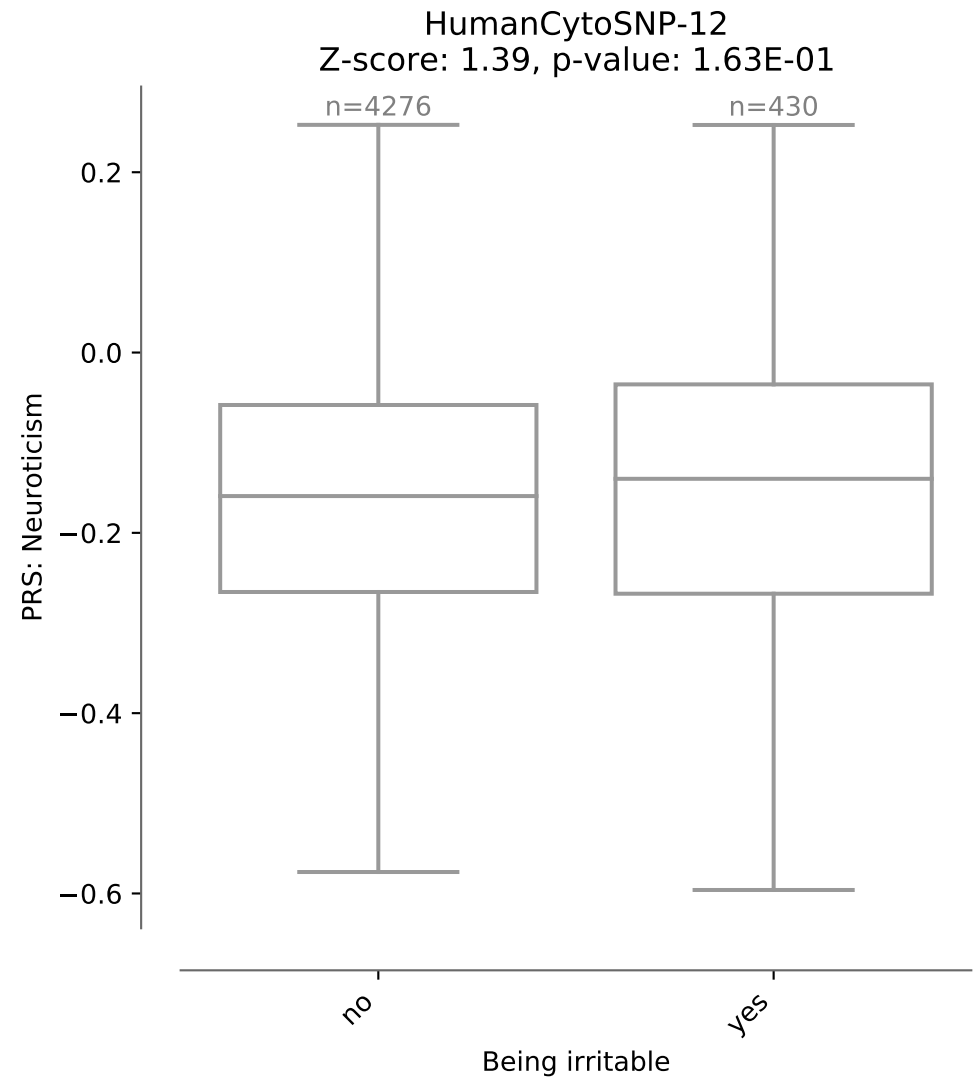

Felt tense  
PGS: Depression  
Meta analysis Z-score: 5.82, p-value: 5.91E-09

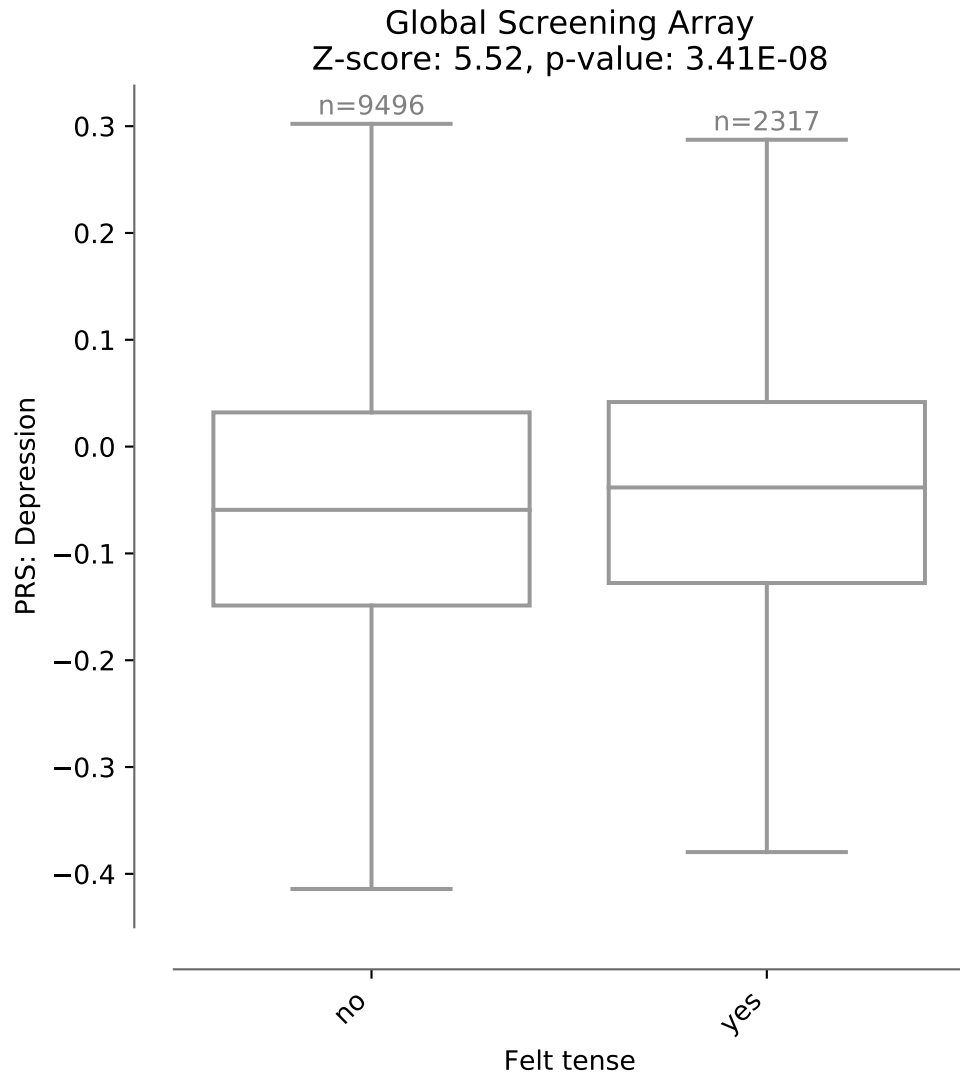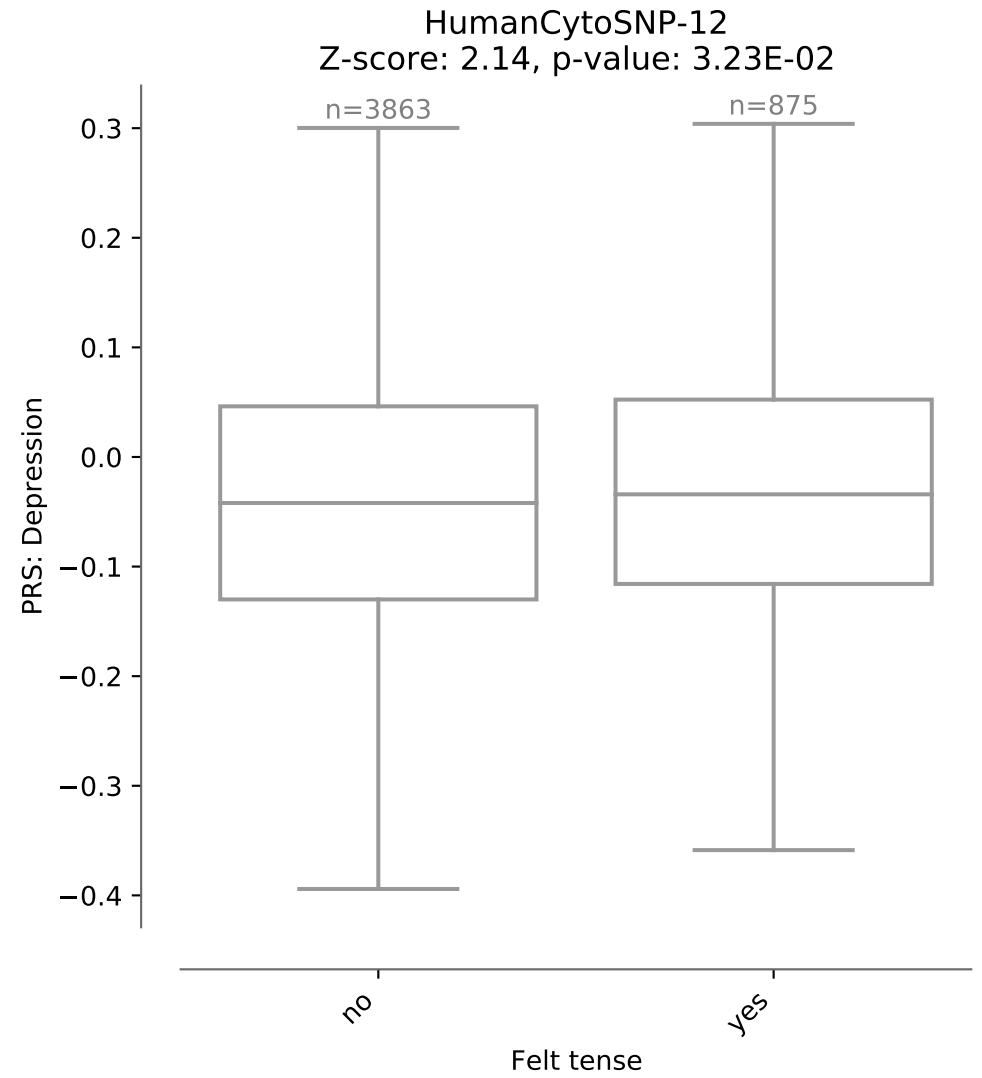

Felt tense  
PGS: Life satisfaction  
Meta analysis Z-score: -8.46, p-value: 2.57E-17

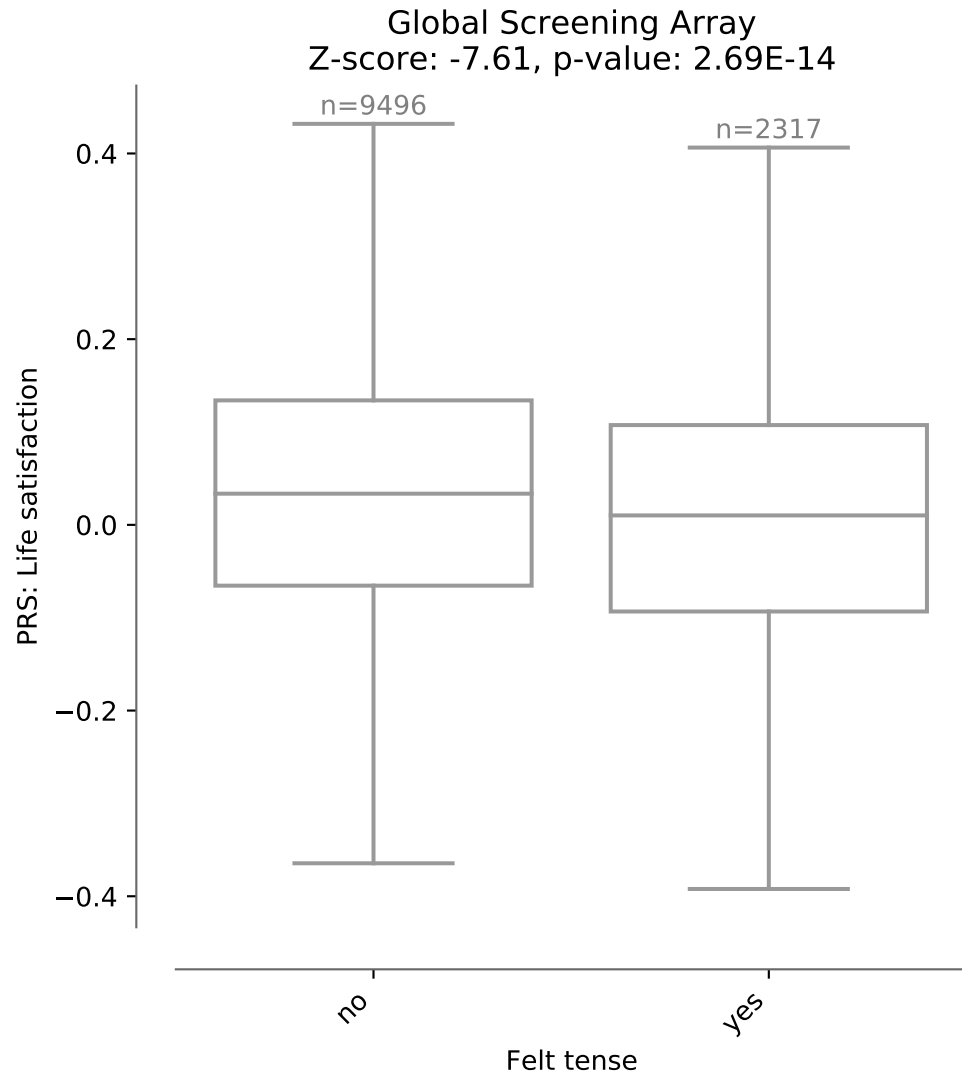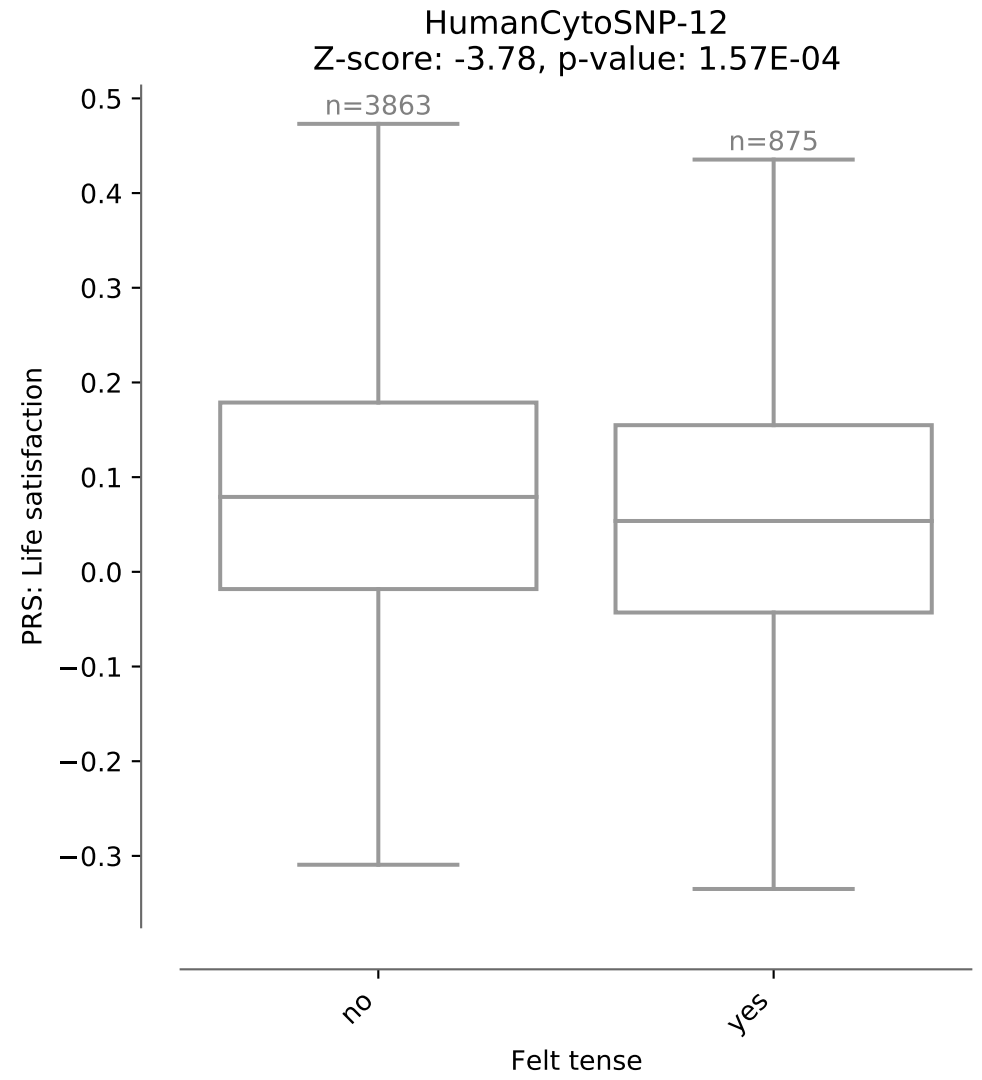

Felt tense  
PGS: Neuroticism  
Meta analysis Z-score: 8.81, p-value: 1.23E-18

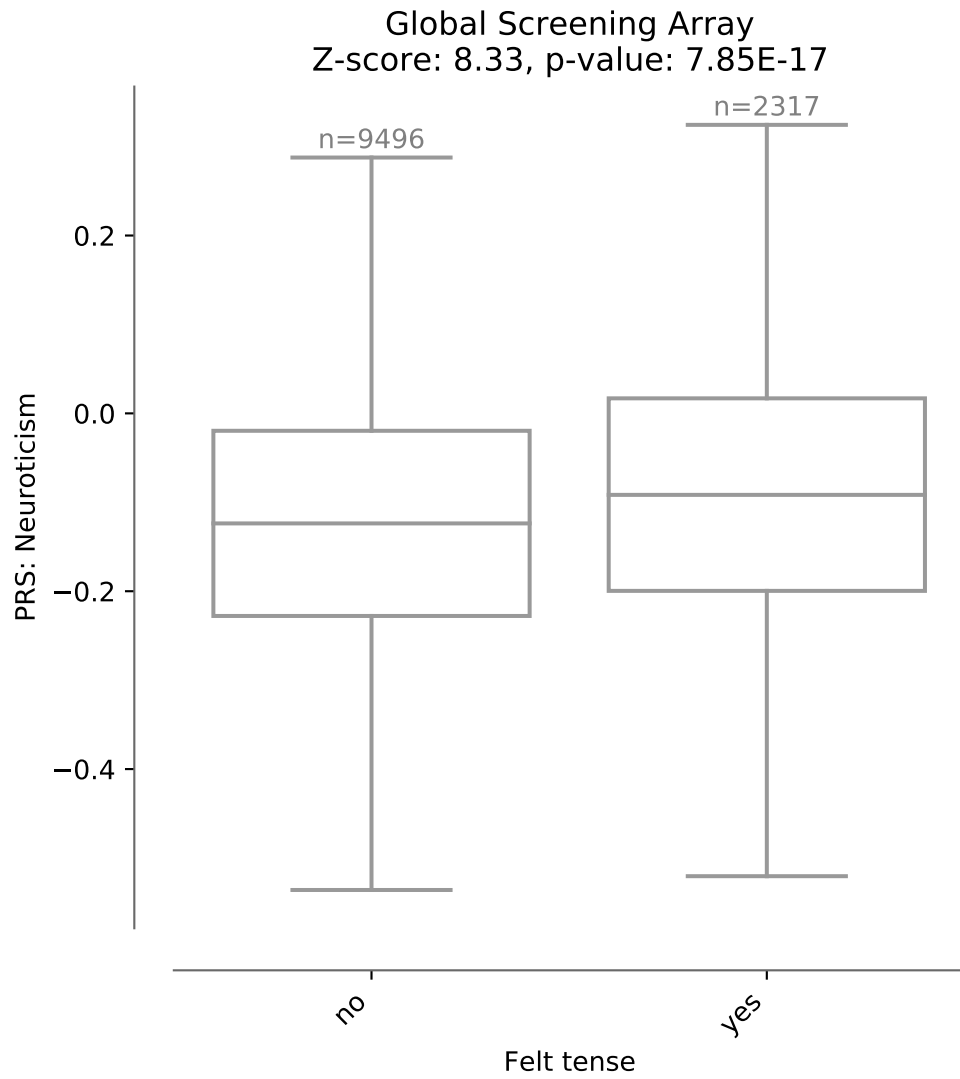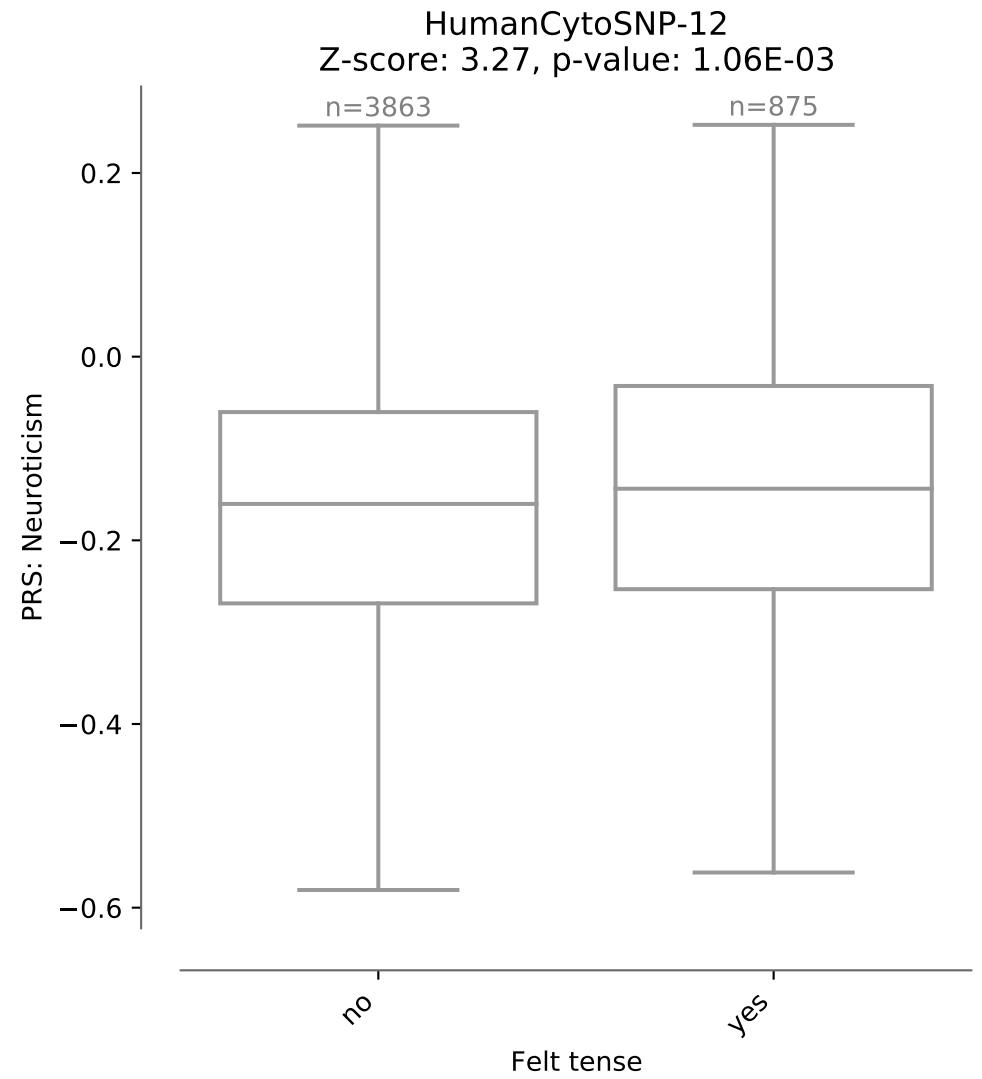

Felt tense  
PGS: Schizophrenia  
Meta analysis Z-score: 5.64, p-value: 1.69E-08

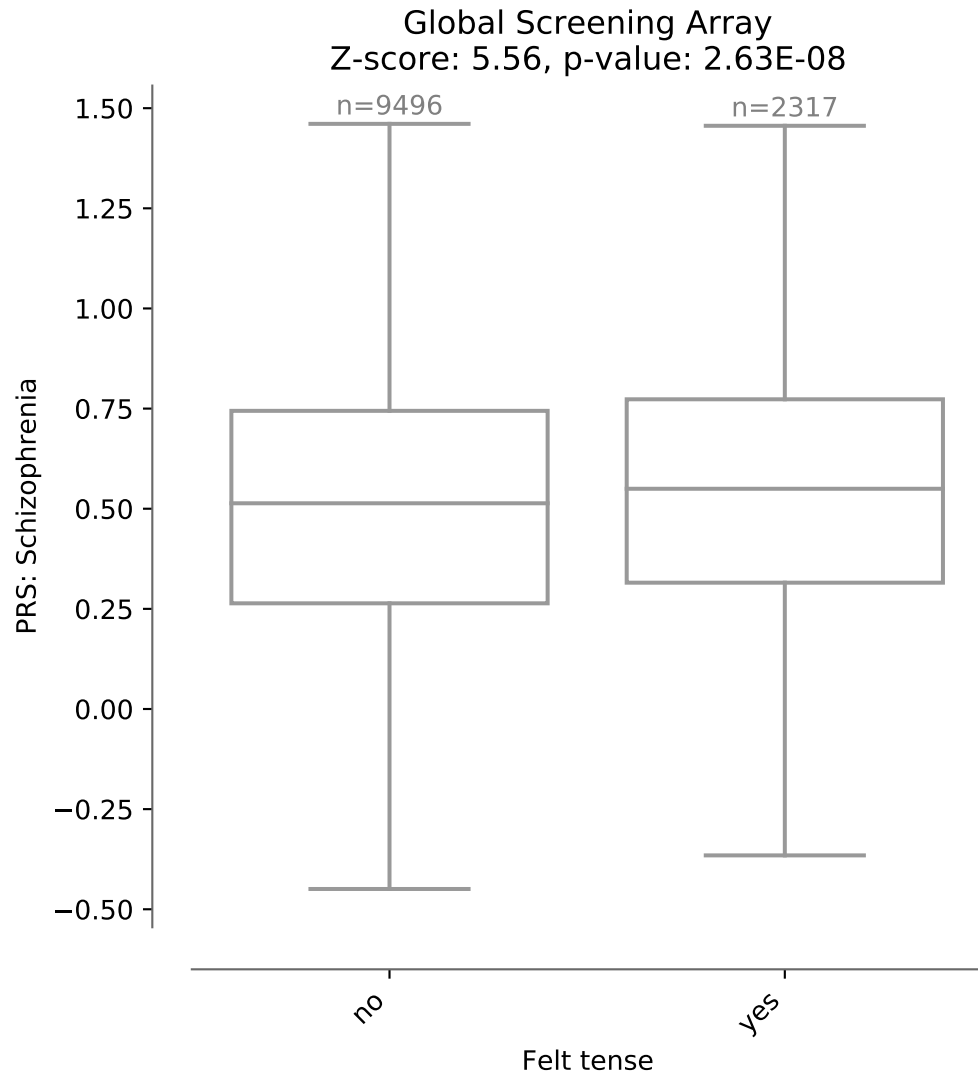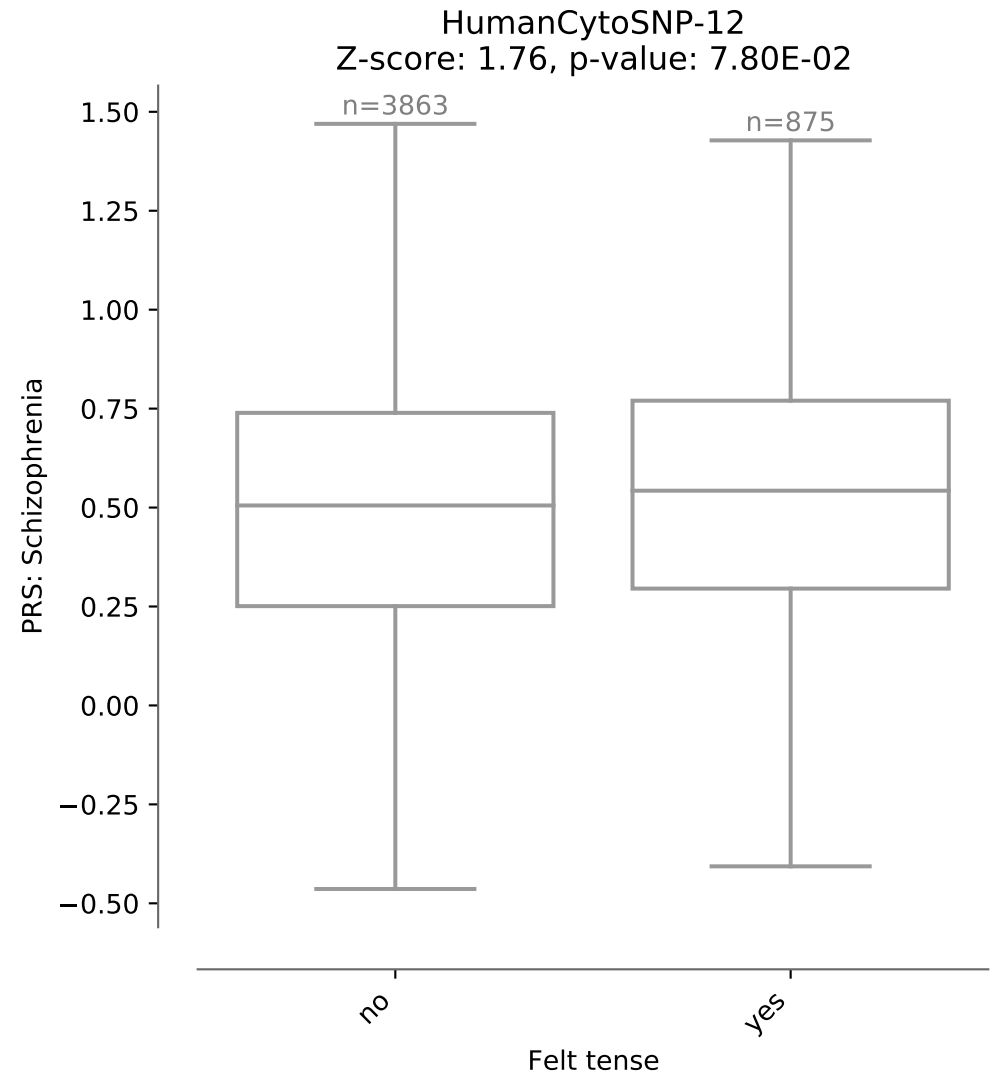

Felt restless, jittery or nervous  
PGS: Depression  
Meta analysis Z-score: 4.88, p-value: 1.07E-06

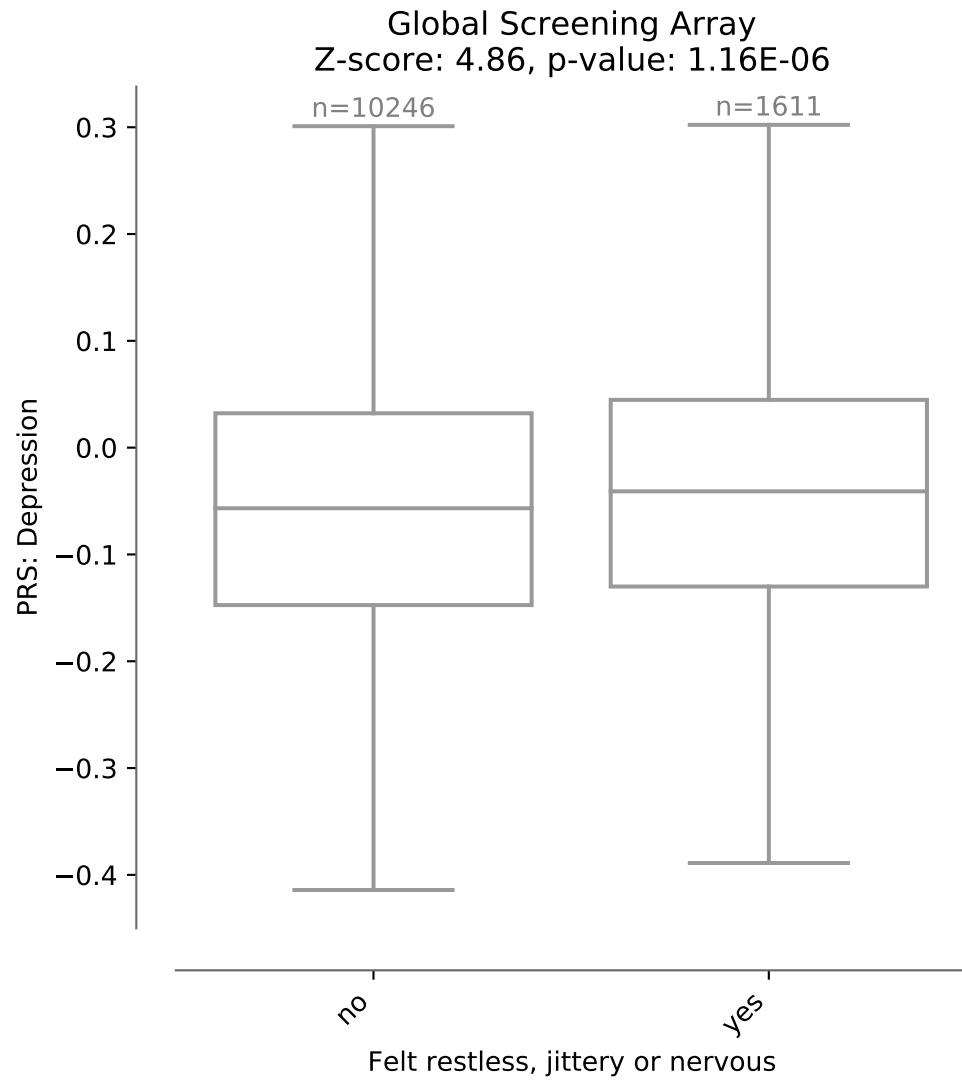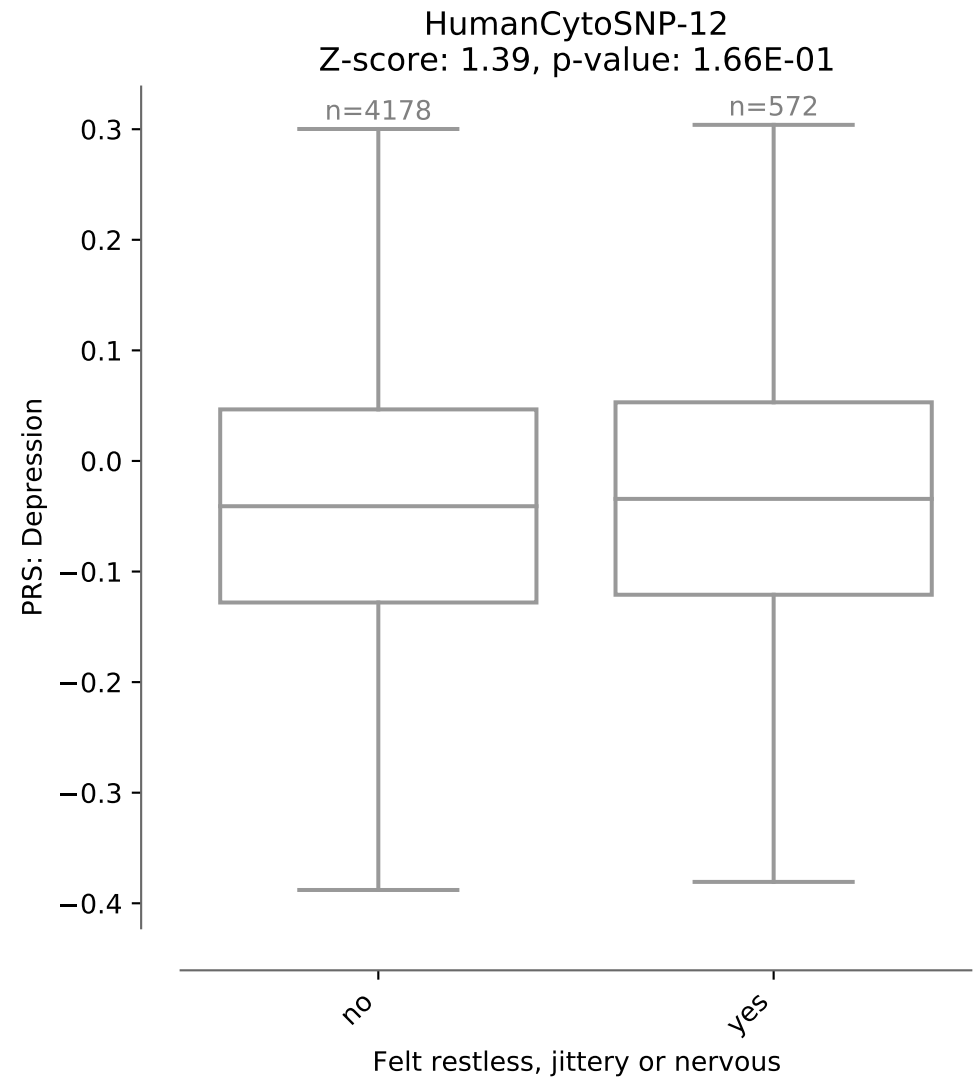

Felt restless, jittery or nervous  
PGS: Life satisfaction  
Meta analysis Z-score: -7.57, p-value: 3.82E-14

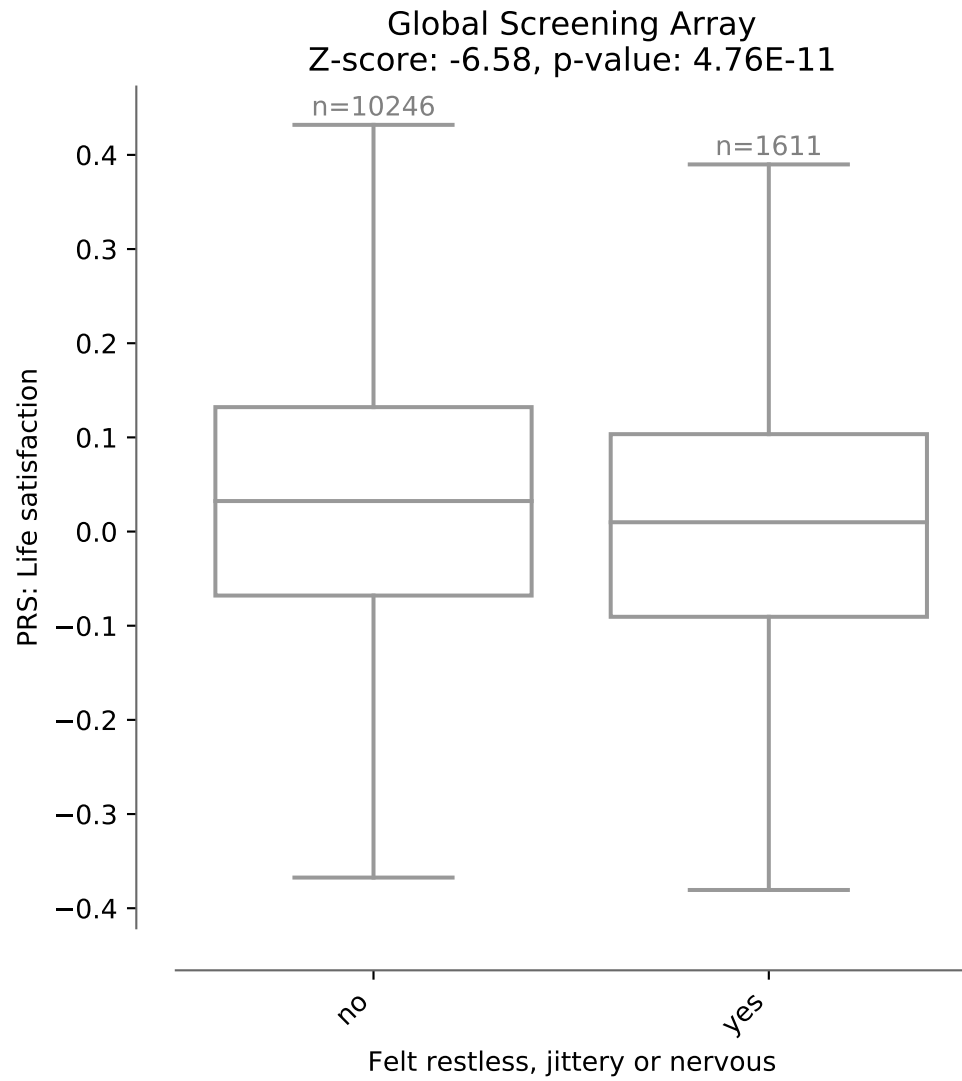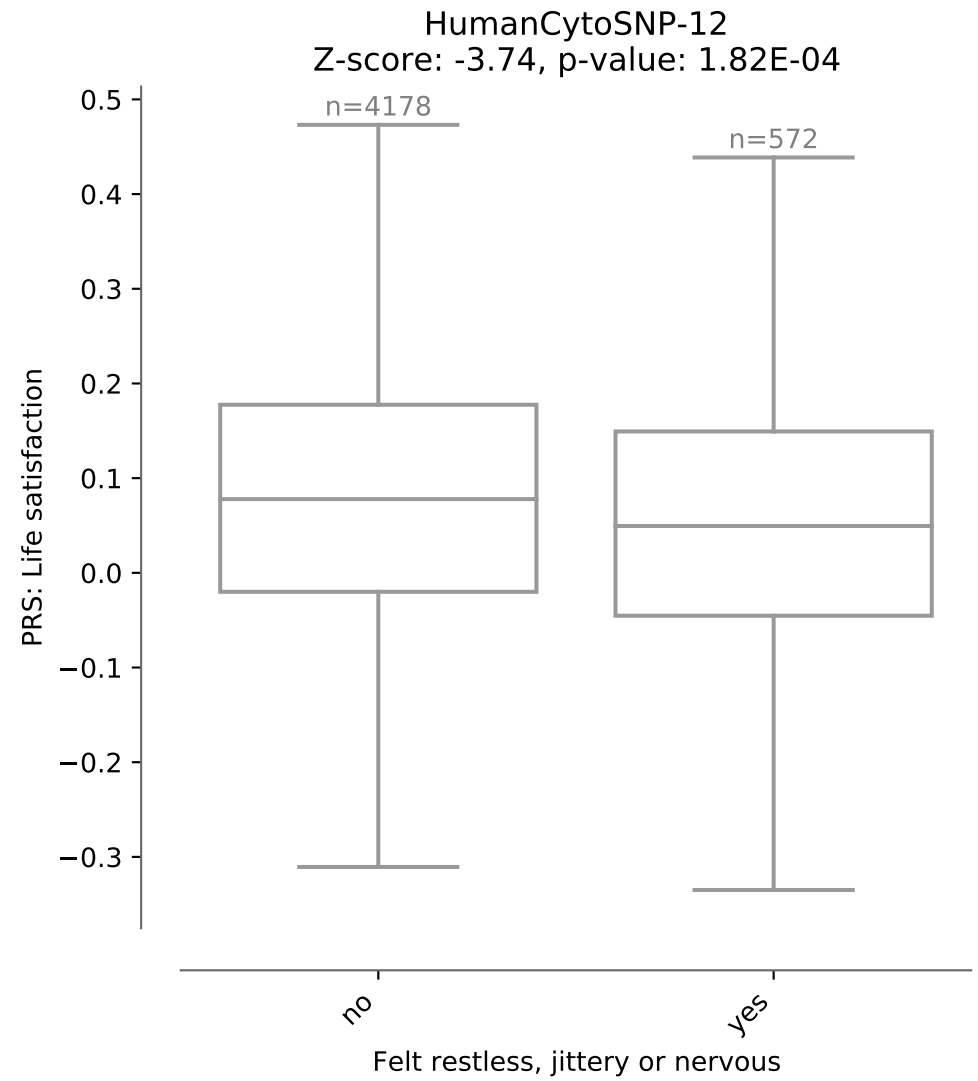

Felt restless, jittery or nervous  
PGS: Neuroticism  
Meta analysis Z-score: 7.96, p-value: 1.79E-15

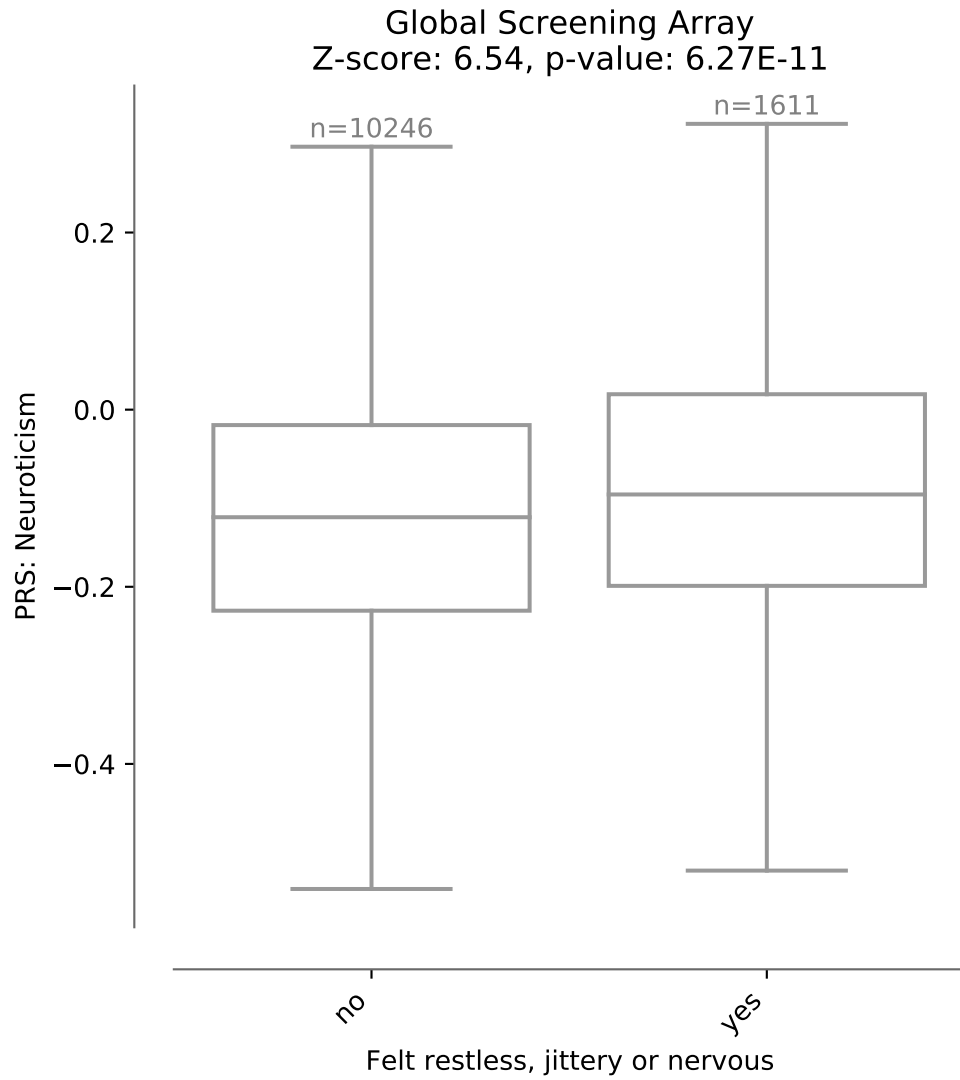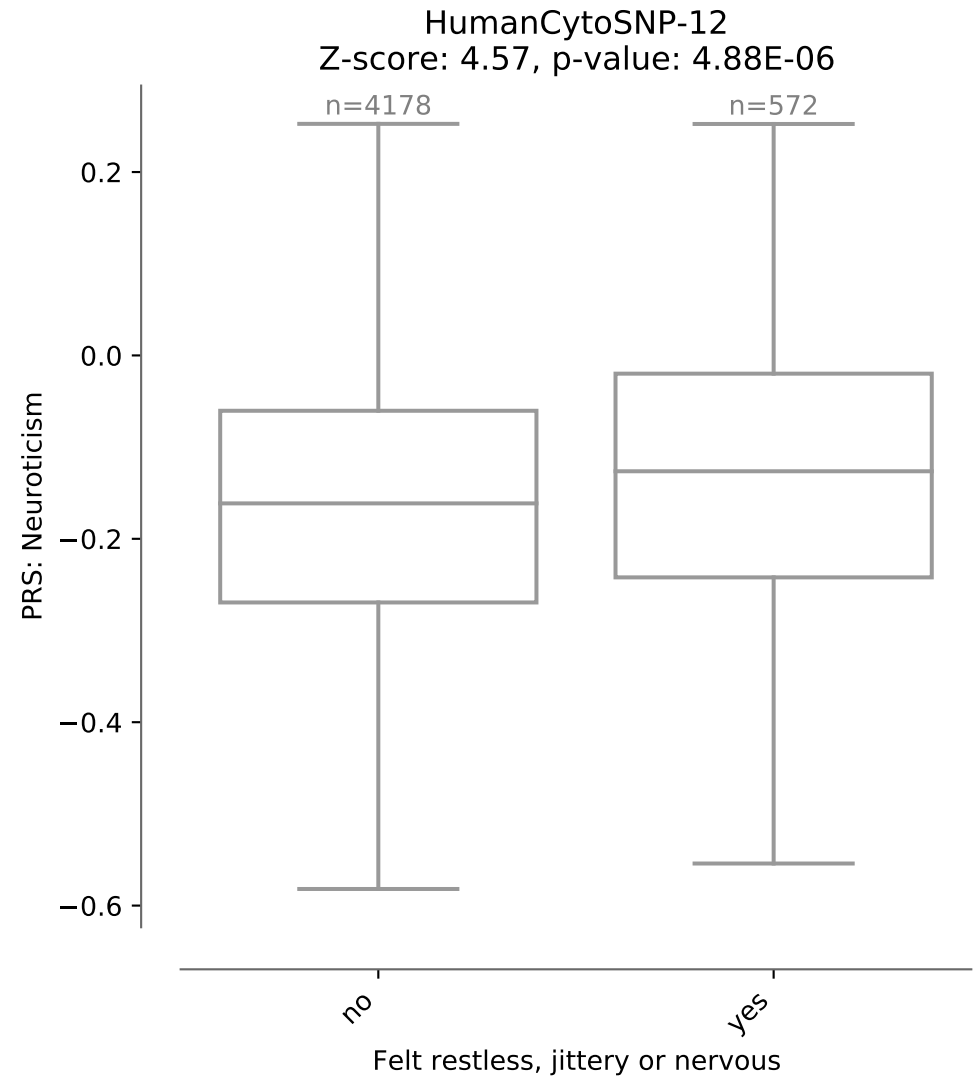



Celebrating christmas in church before the pandemic  
PGS: Anxiety/tension  
Meta analysis Z-score: 4.80, p-value: 1.57E-06

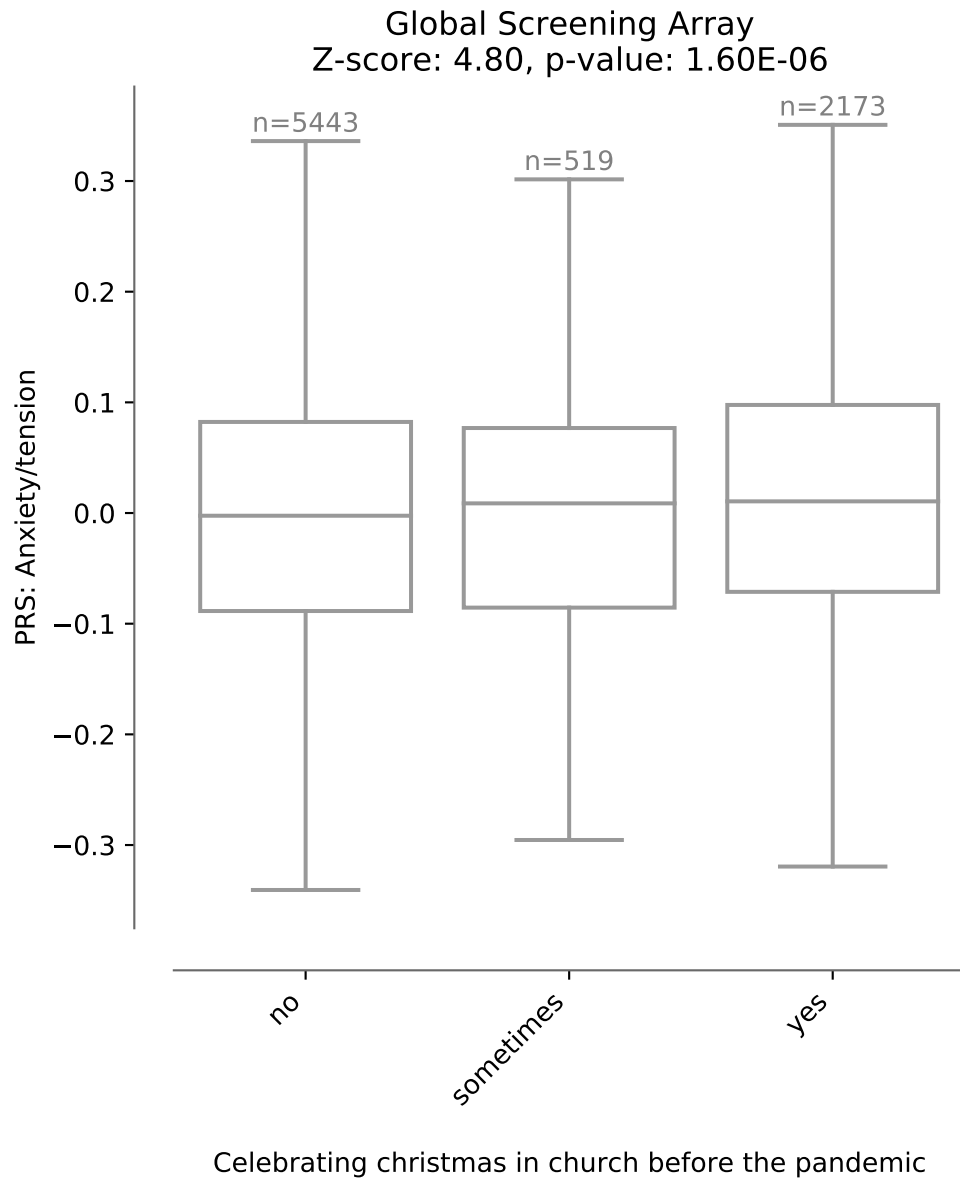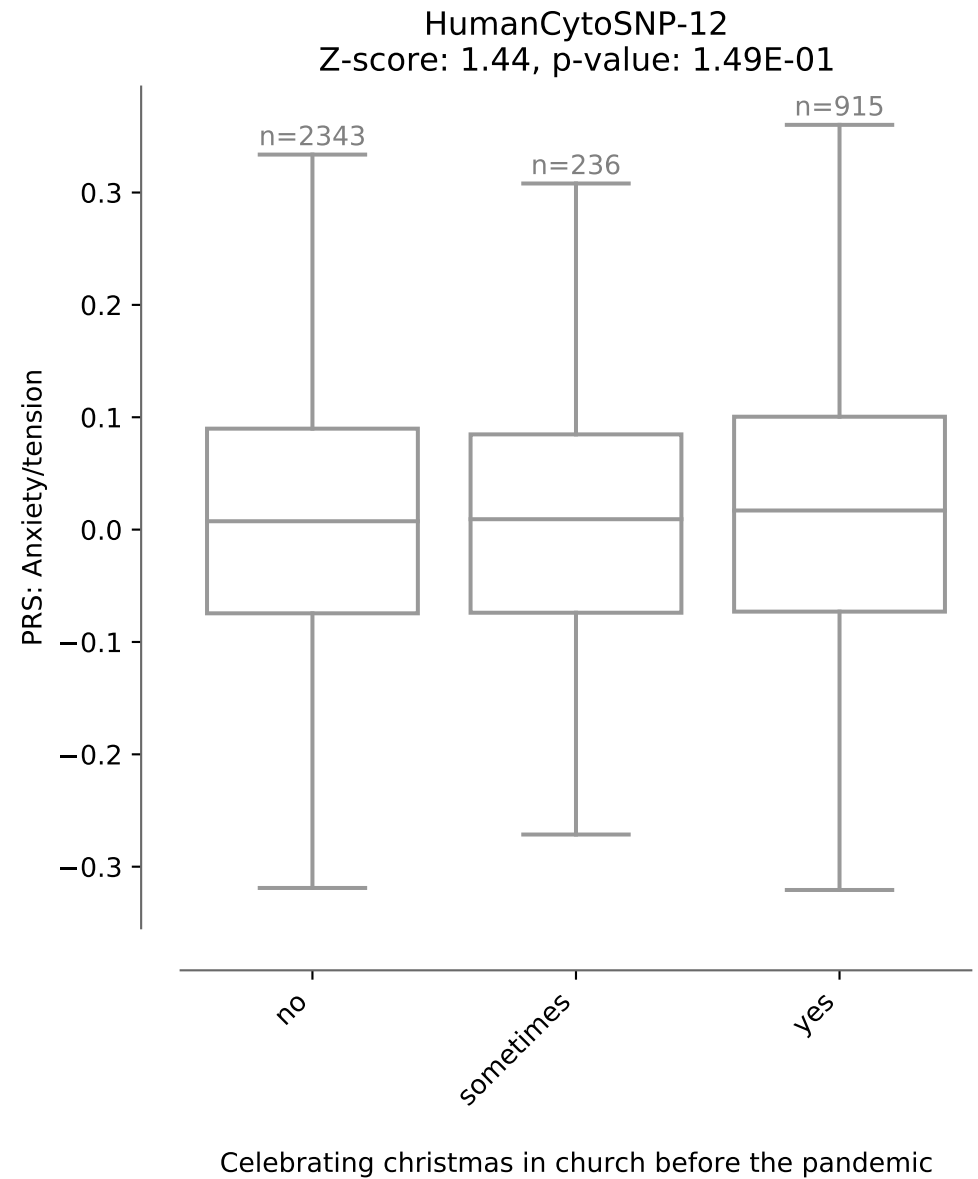

Celebrating christmas in church before the pandemic  
PGS: Educational attainment  
Meta analysis Z-score: 11.79, p-value: 4.54E-32

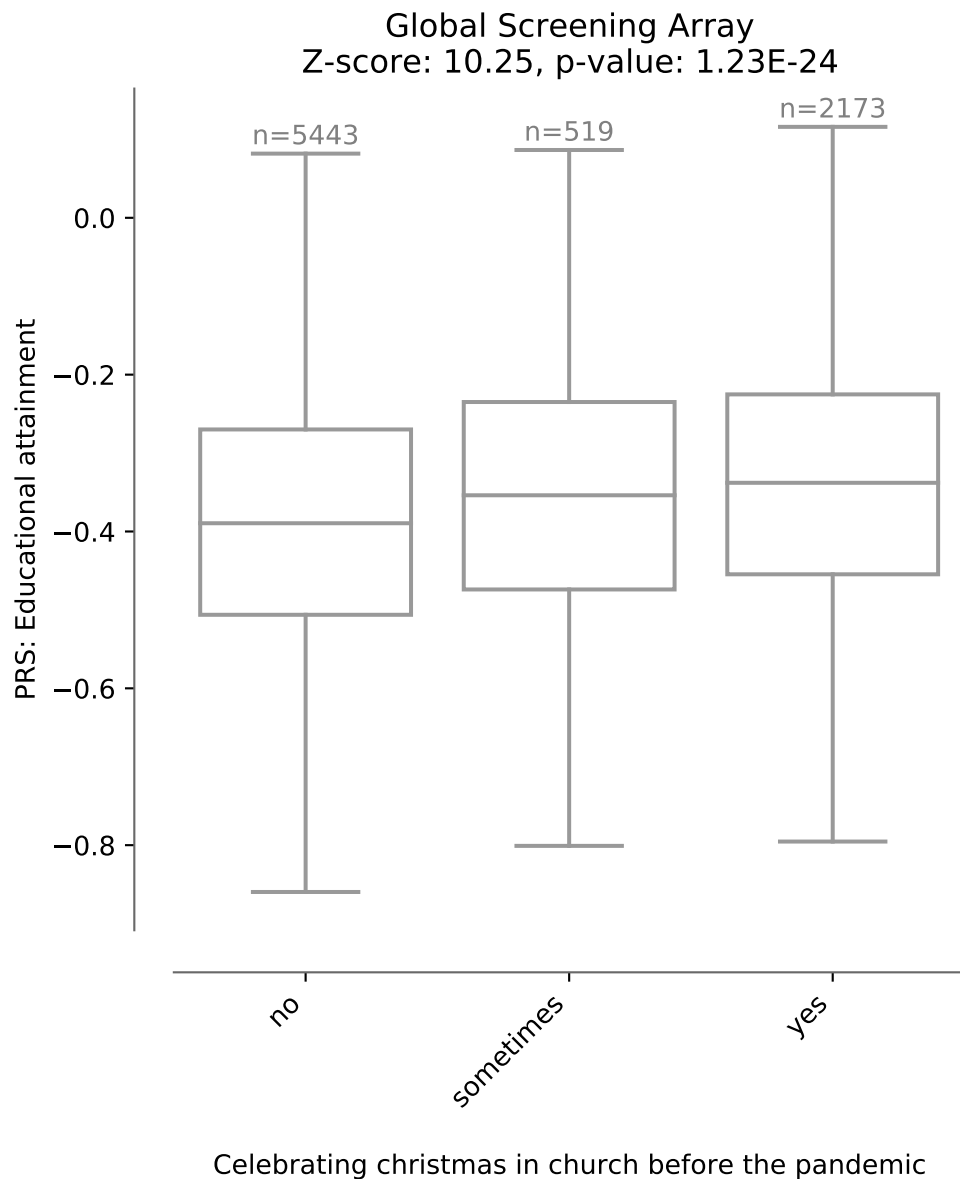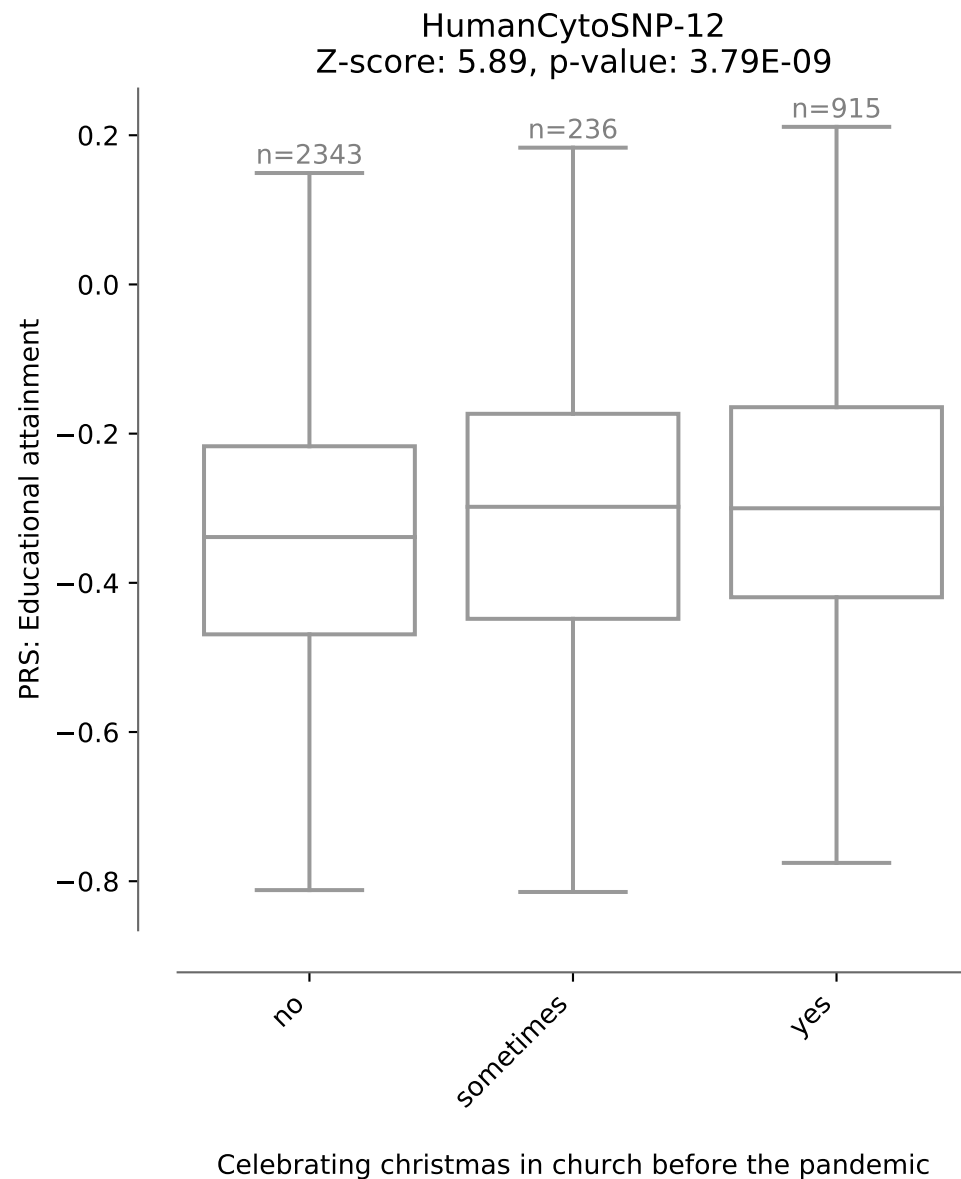

Celebrating christmas in church before the pandemic

PGS: Life satisfaction

Meta analysis Z-score: 4.79, p-value: 1.63E-06

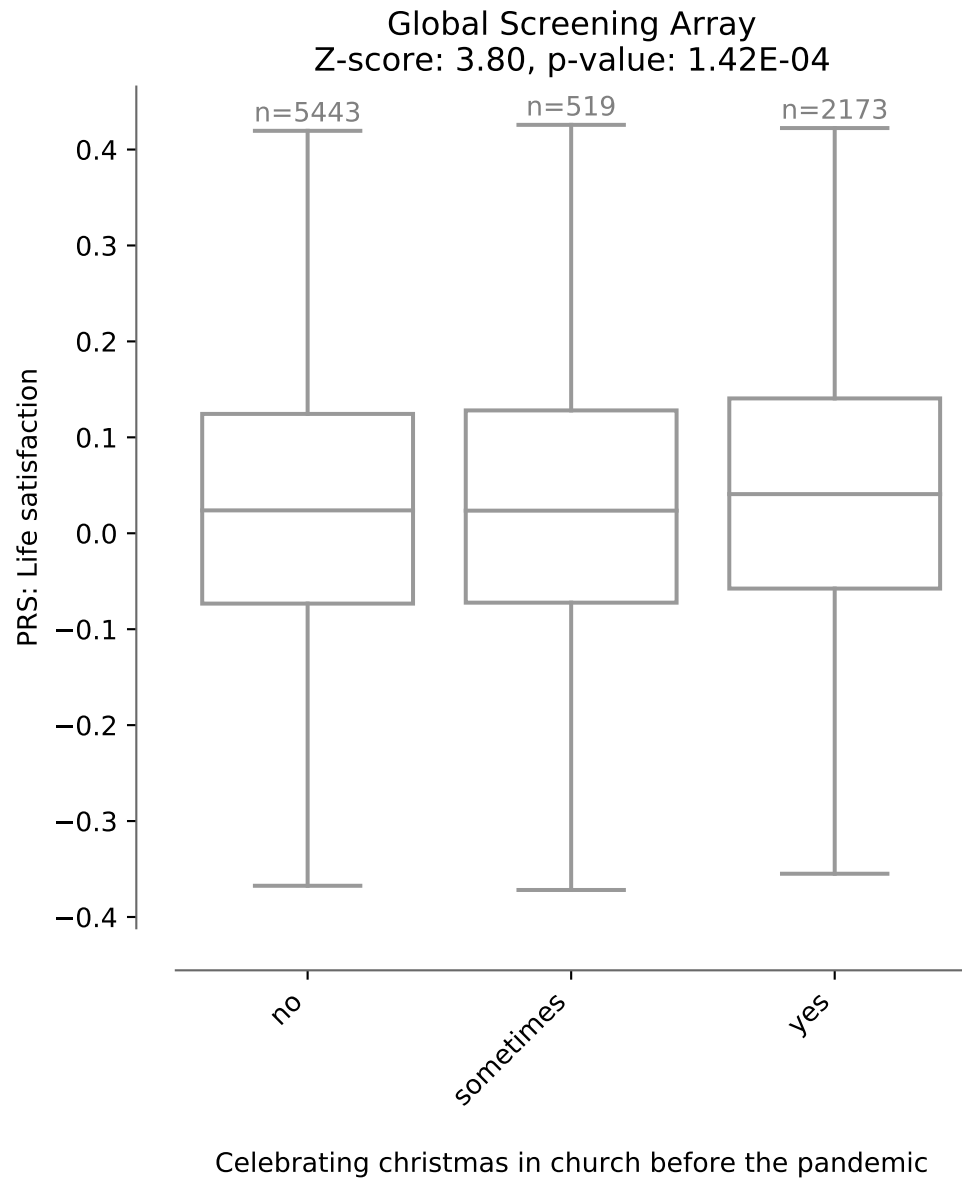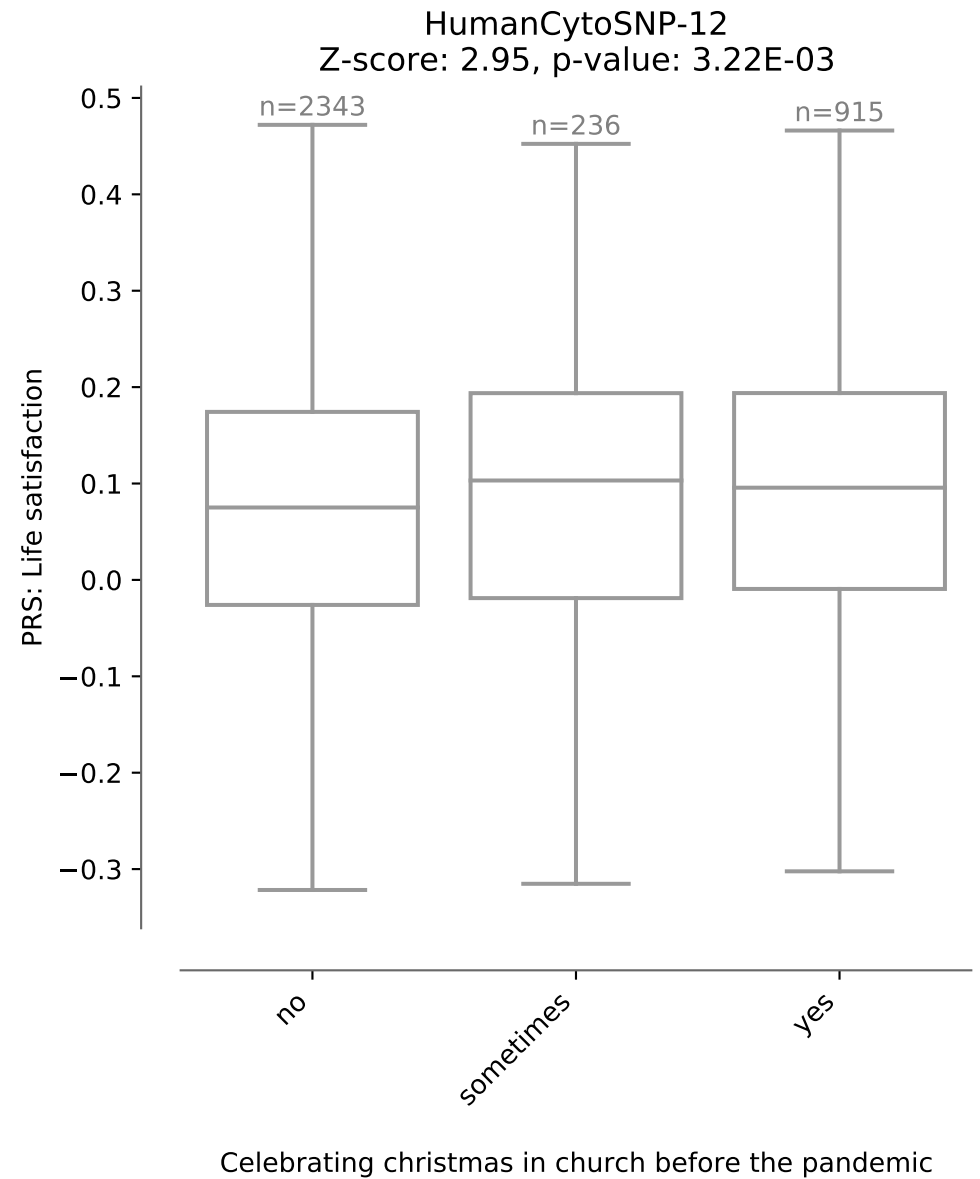

Celebrating christmas in church before the pandemic  
PGS: Schizophrenia  
Meta analysis Z-score: -4.51, p-value: 6.47E-06

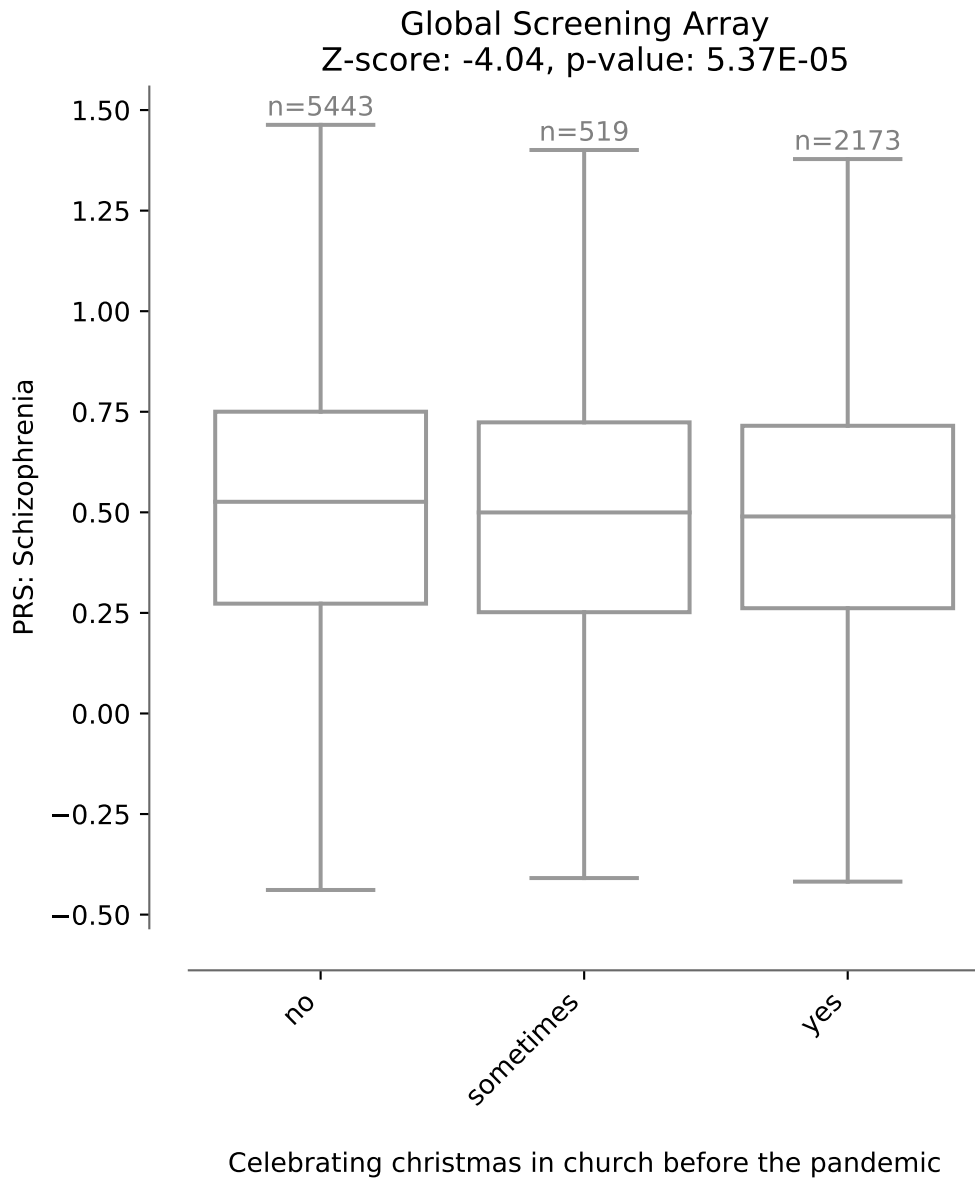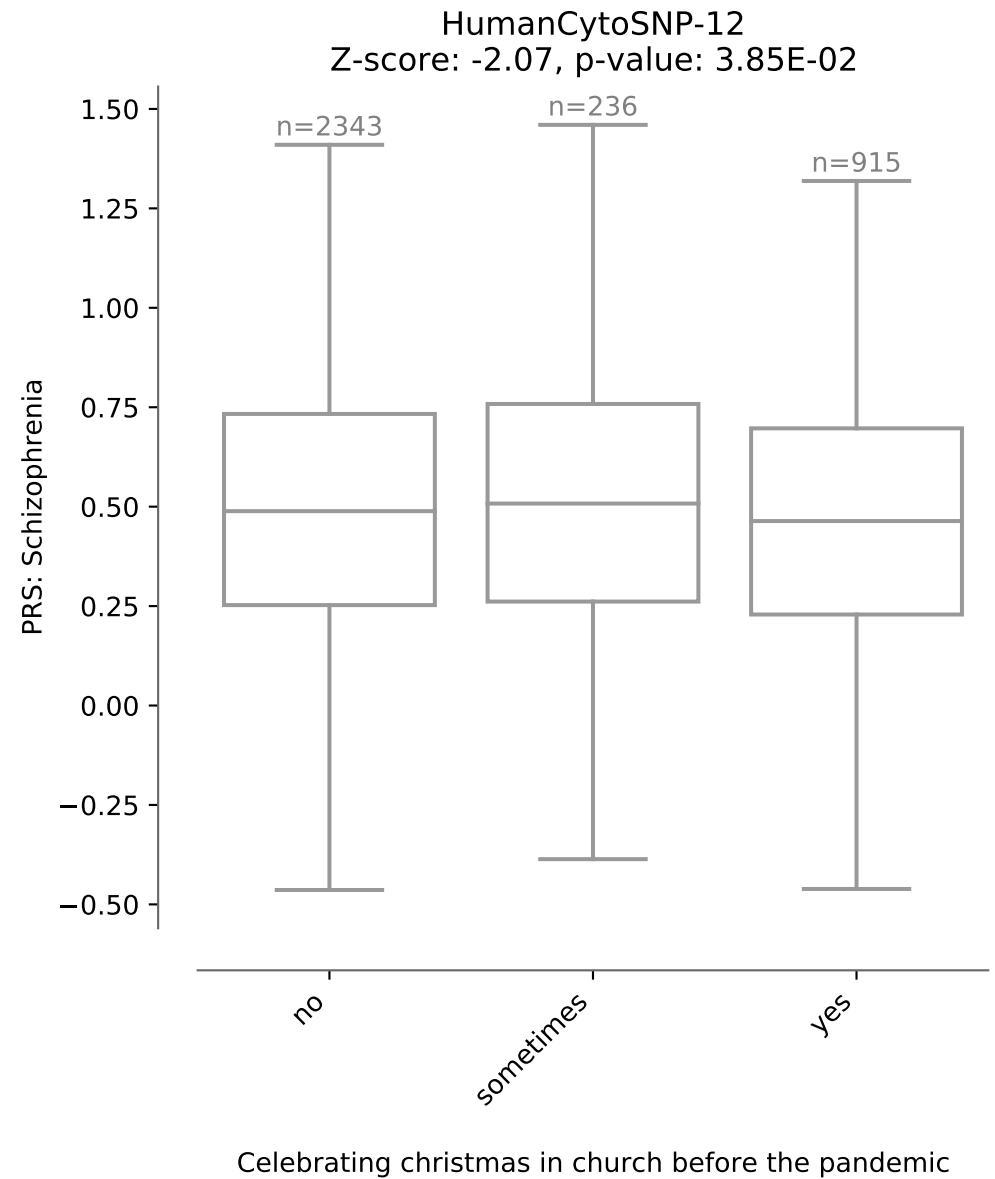

Celebrating christmas in church before the pandemic  
PGS: Worry/vulnerability  
Meta analysis Z-score: 5.34, p-value: 9.13E-08

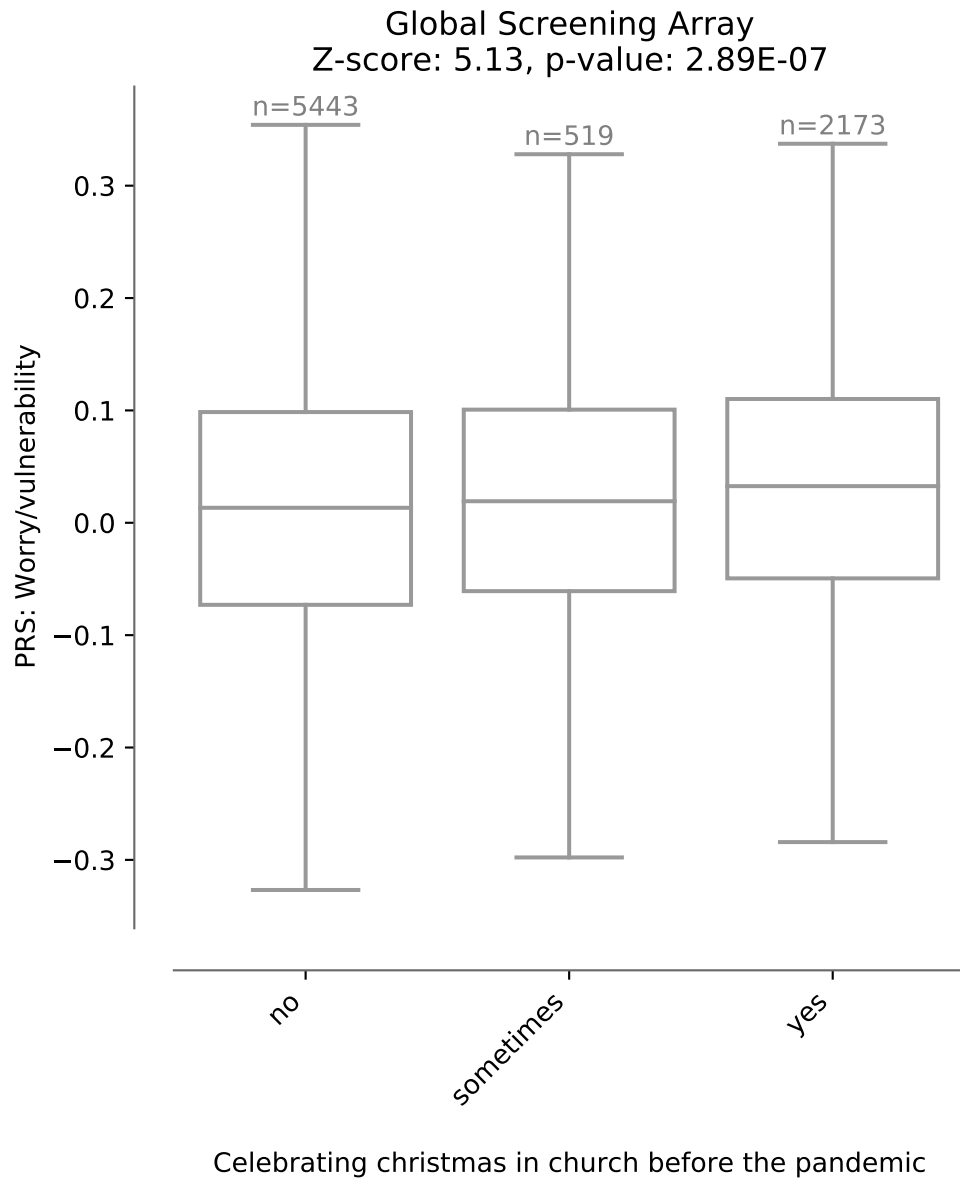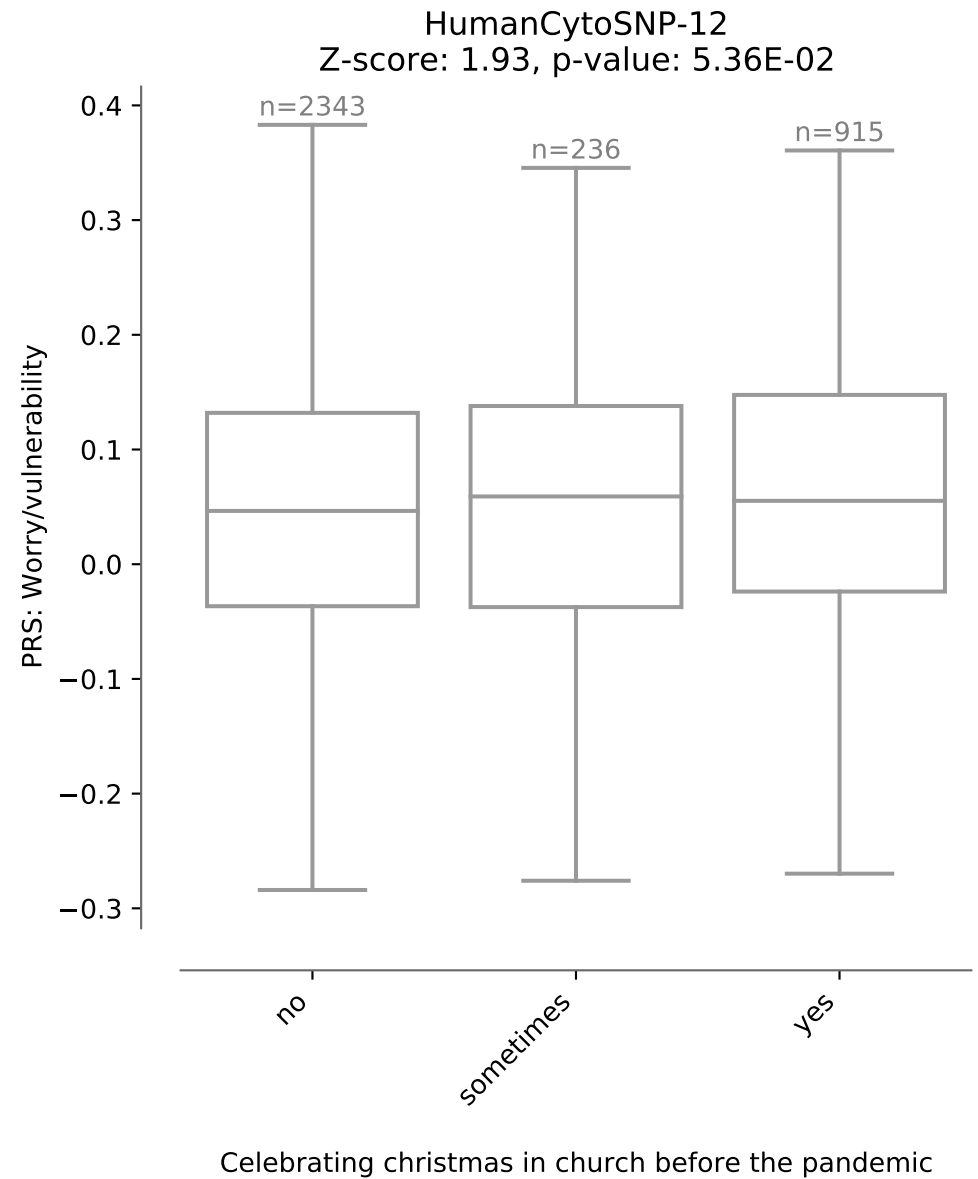

Felt hostile  
PGS: Depression  
Meta analysis Z-score: 5.59, p-value: 2.22E-08

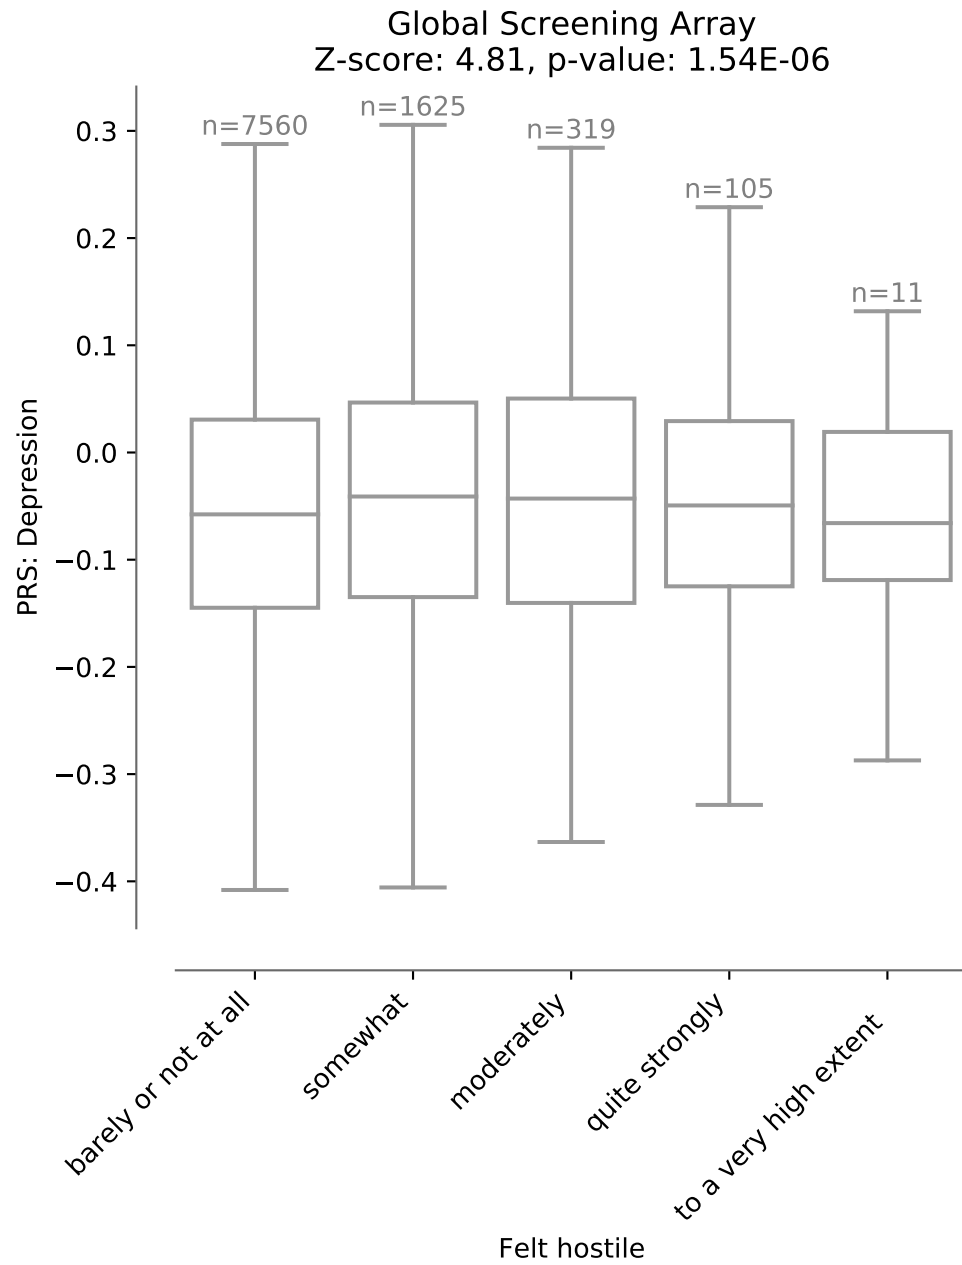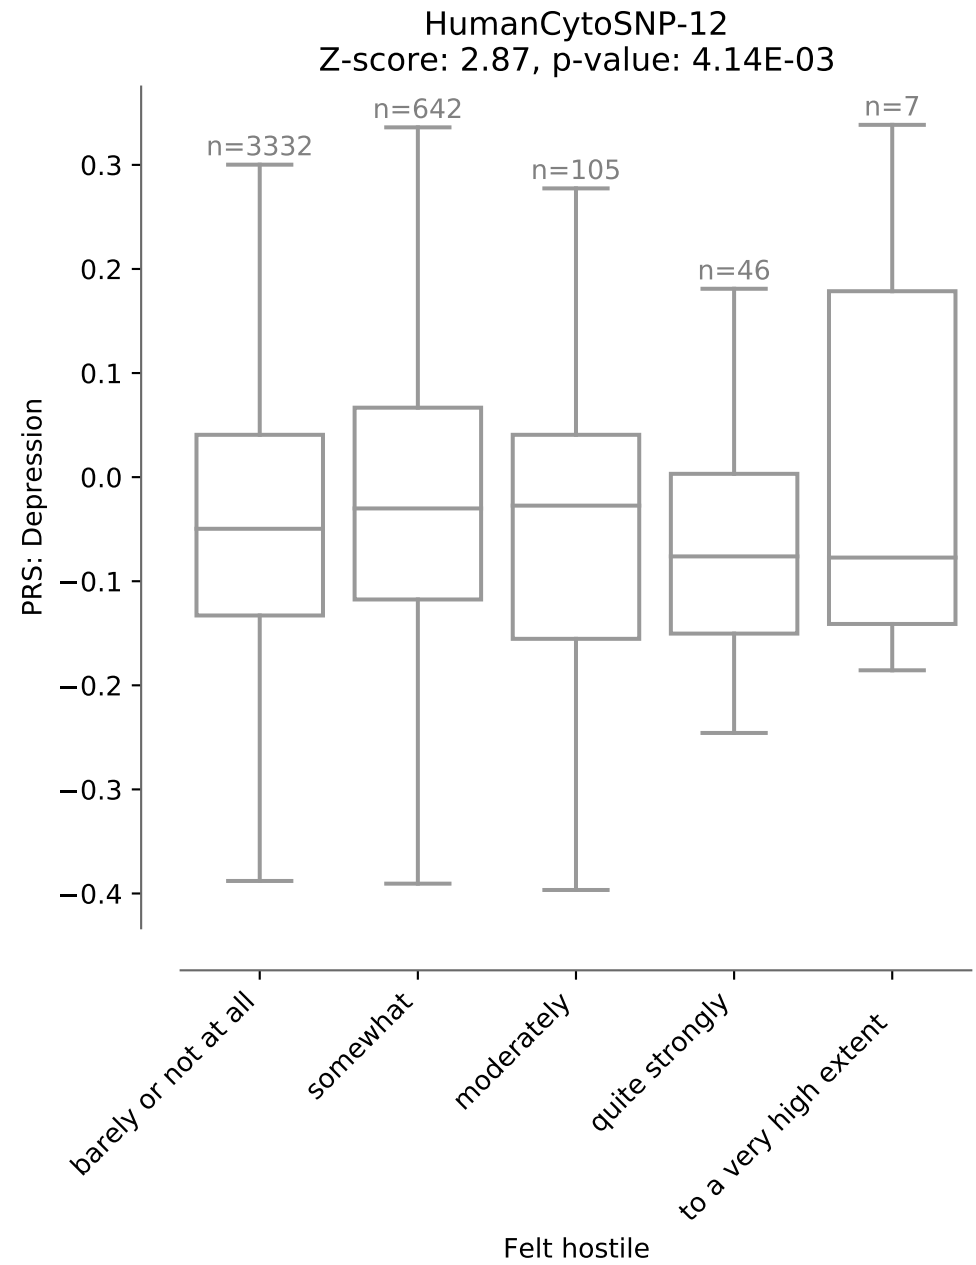

Felt hostile  
PGS: Life satisfaction  
Meta analysis Z-score: -7.34, p-value: 2.15E-13

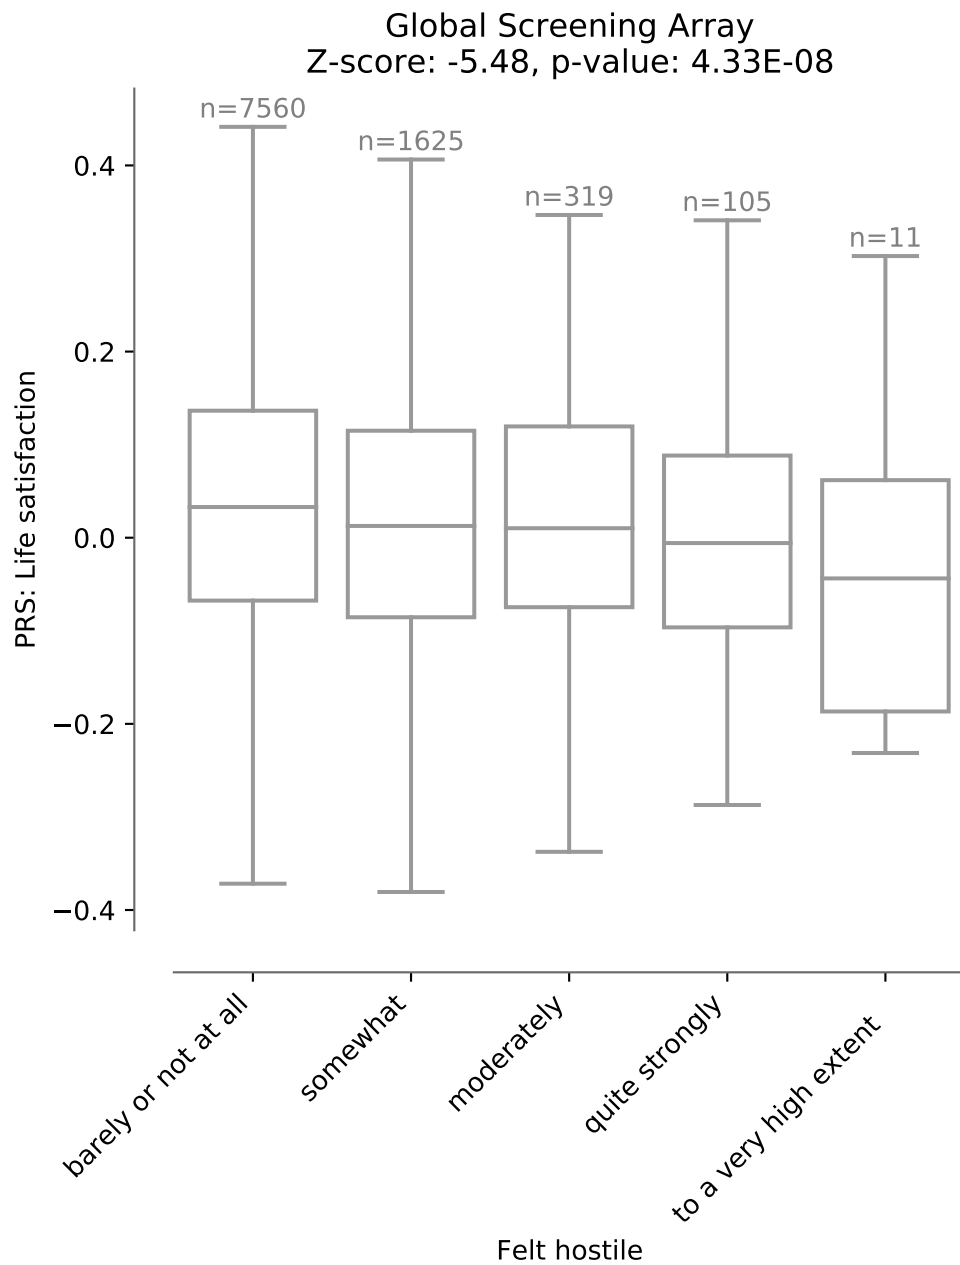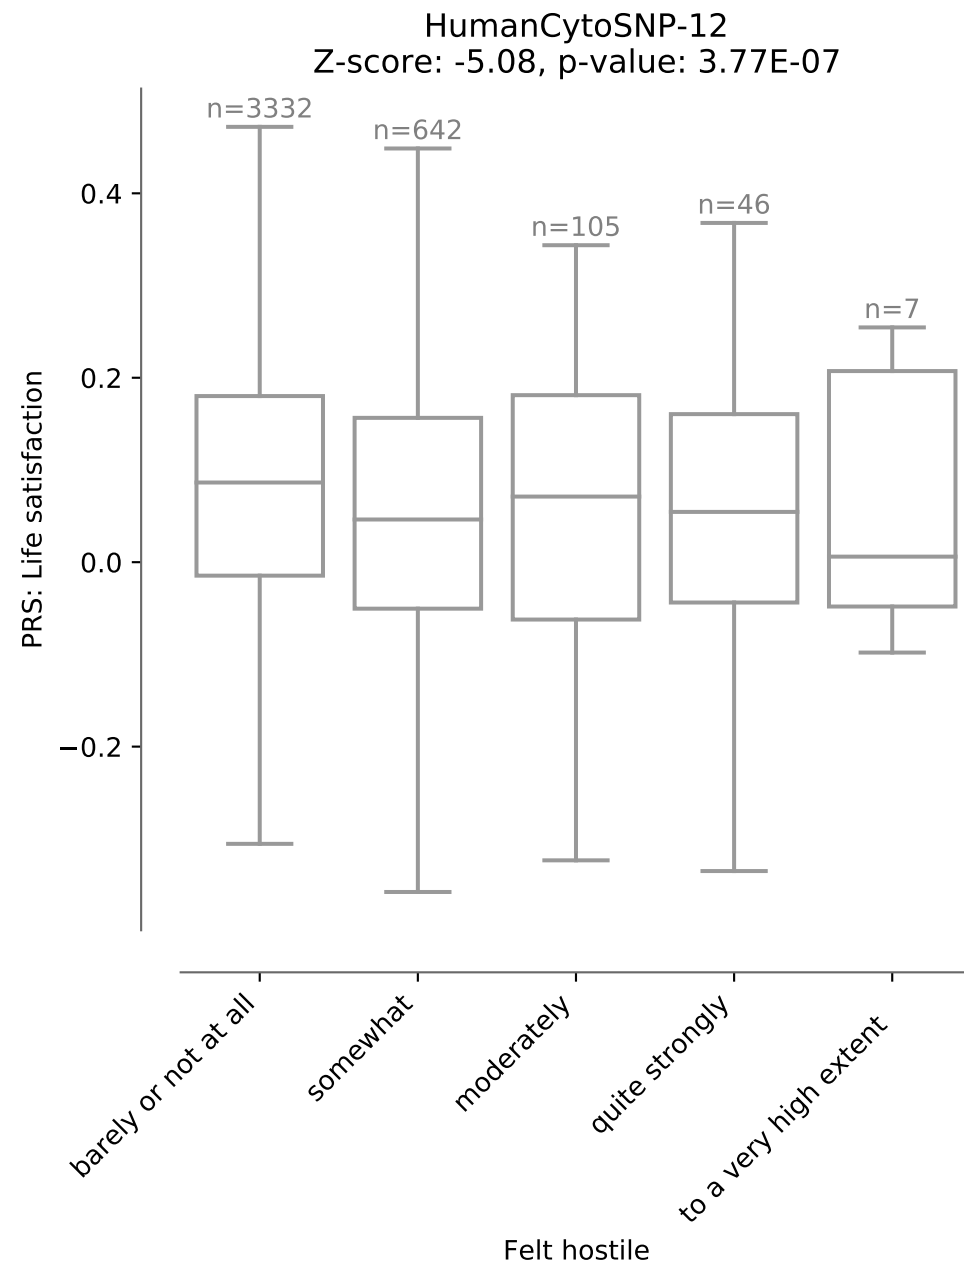

Felt hostile  
PGS: Neuroticism  
Meta analysis Z-score: 7.34, p-value: 2.06E-13

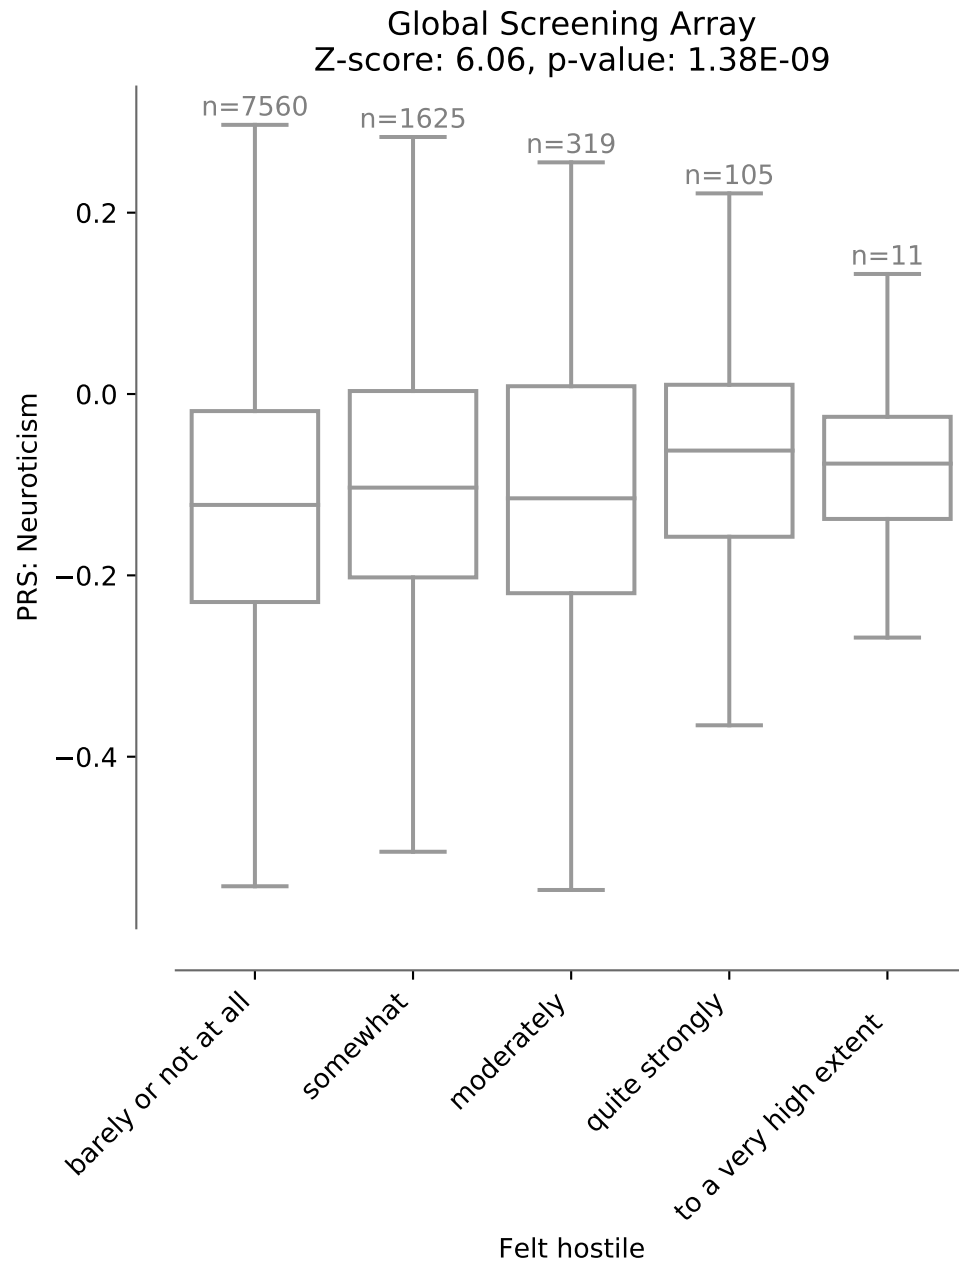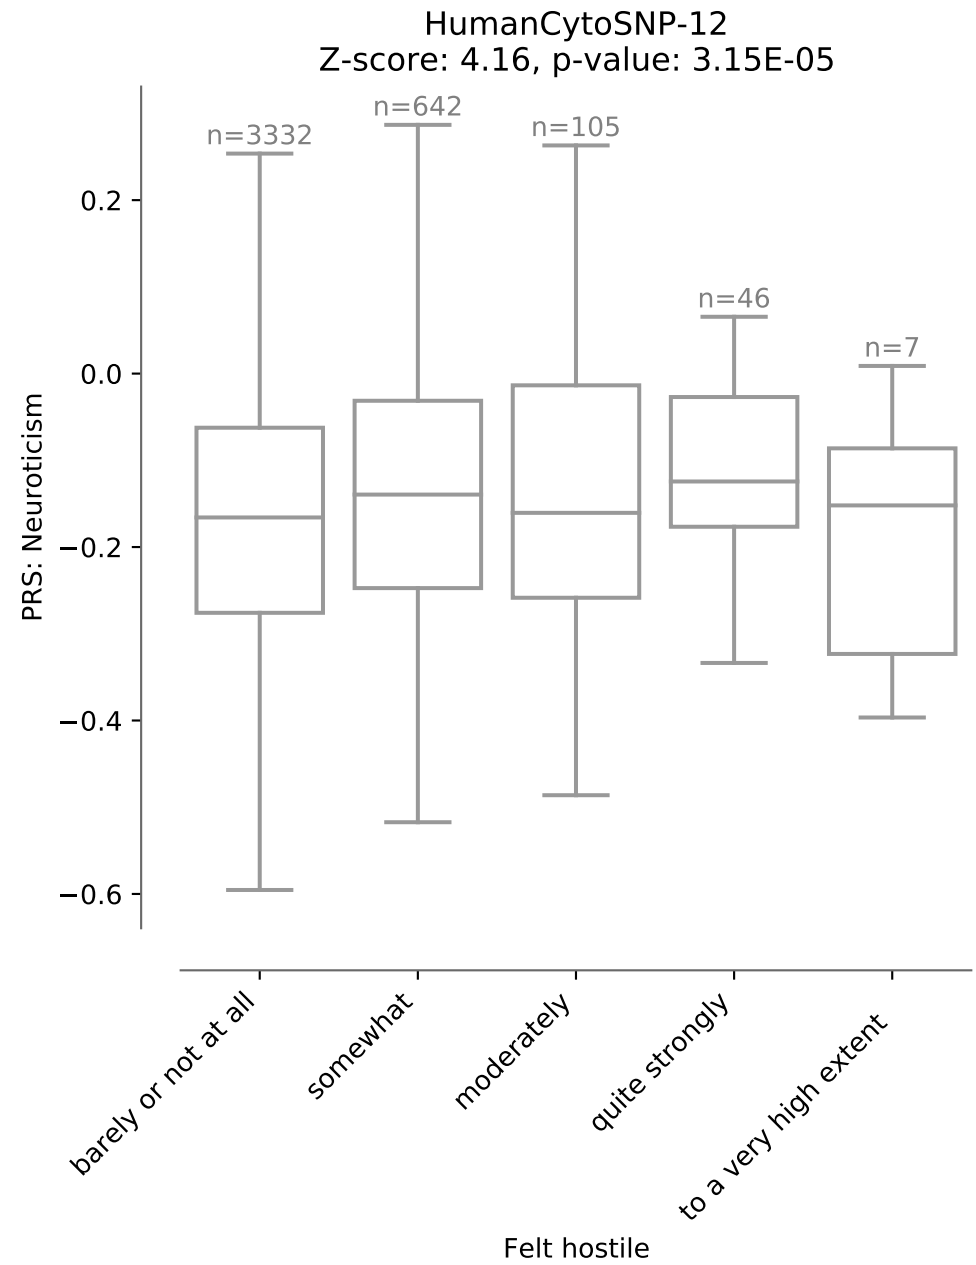



Felt tired or without energy almost every day  
PGS: Life satisfaction  
Meta analysis Z-score: -5.75, p-value: 8.84E-09

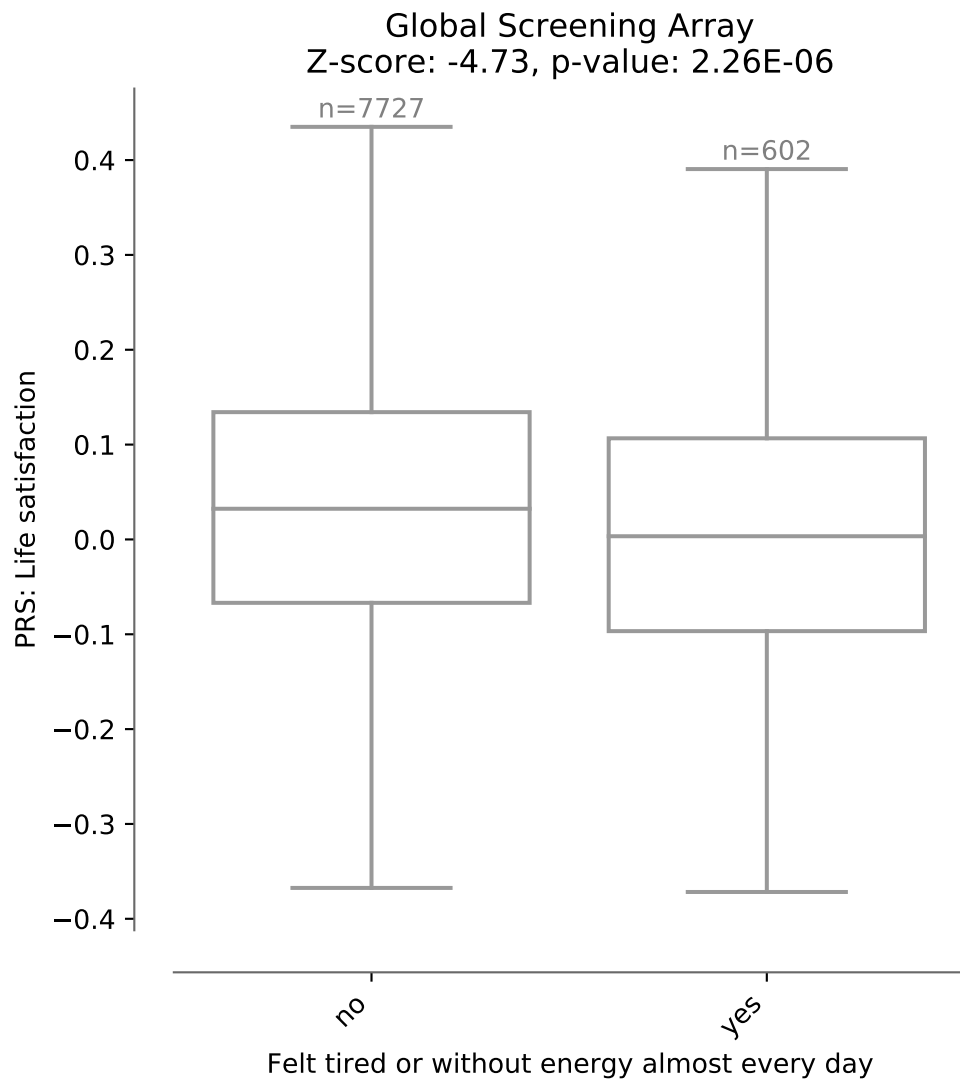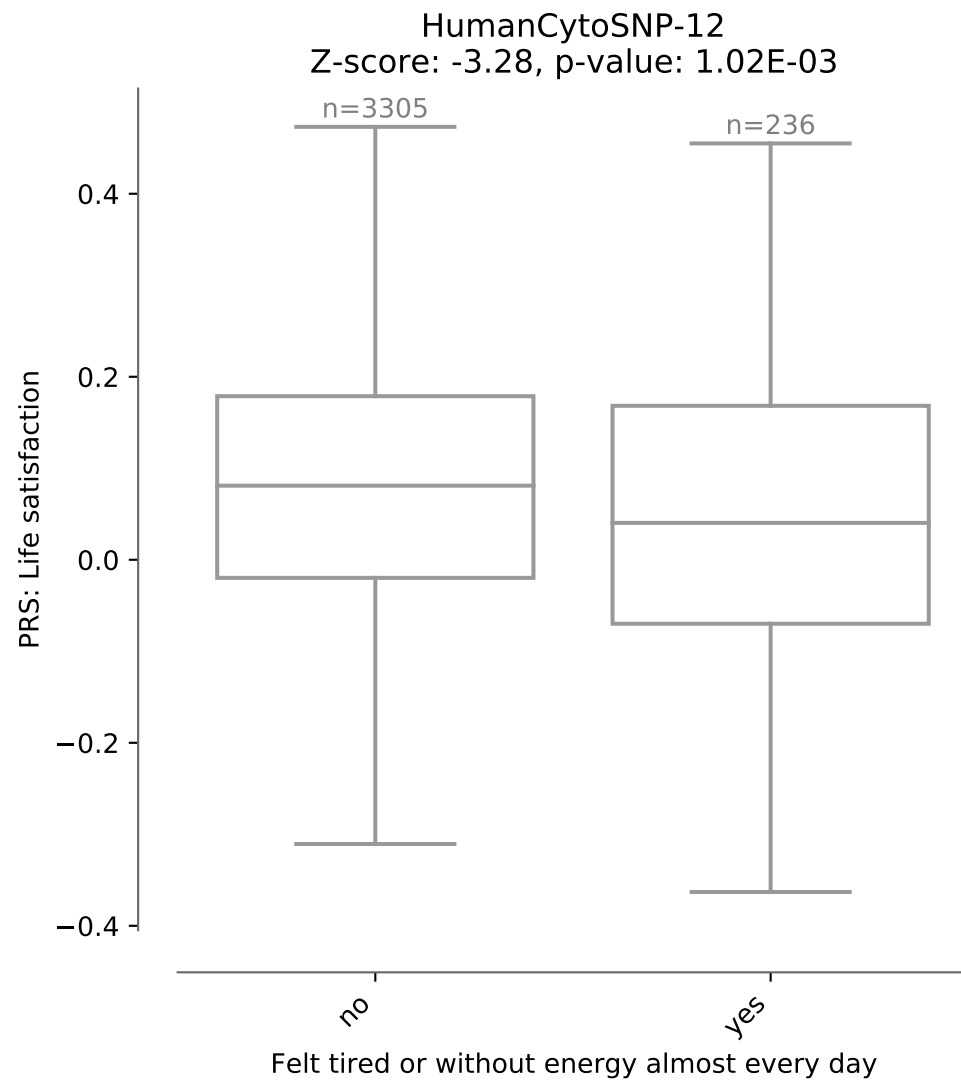

Felt tired or without energy almost every day  
PGS: Neuroticism  
Meta analysis Z-score: 5.25, p-value: 1.52E-07

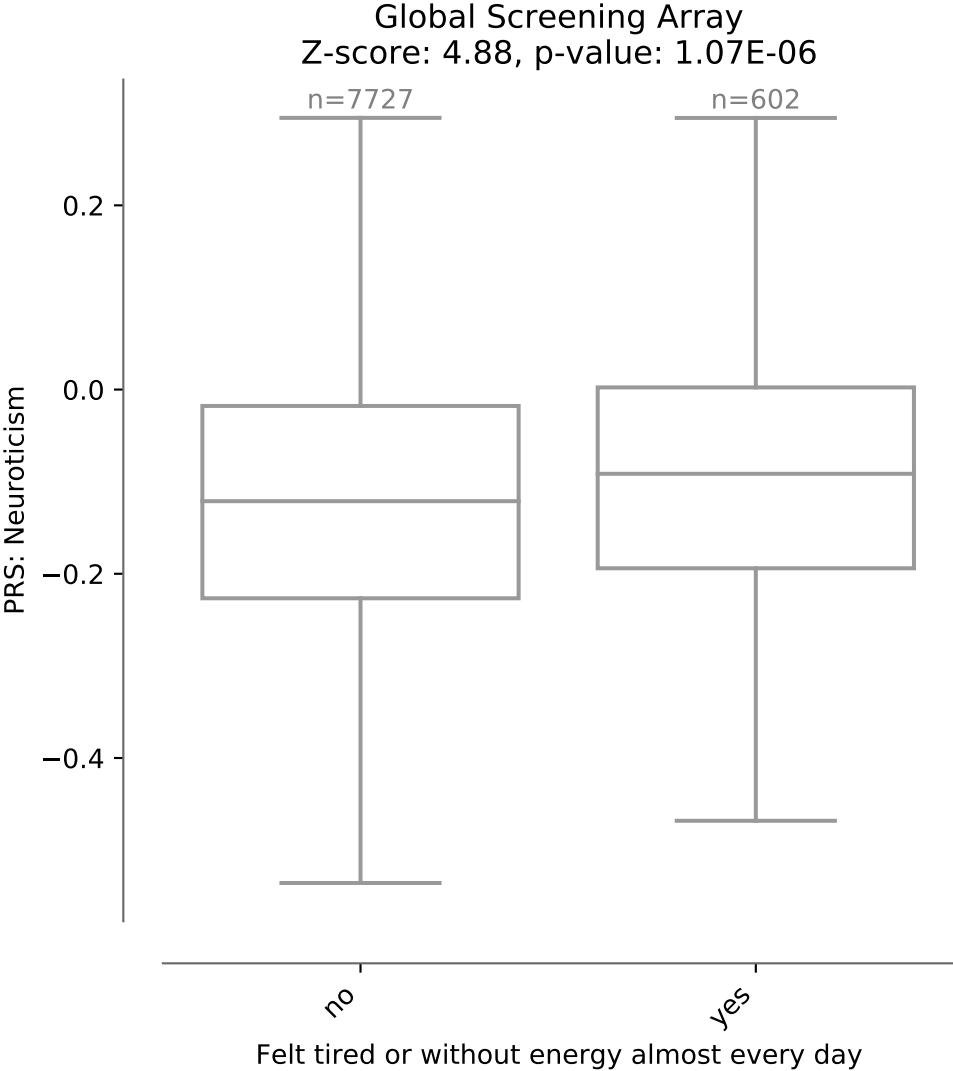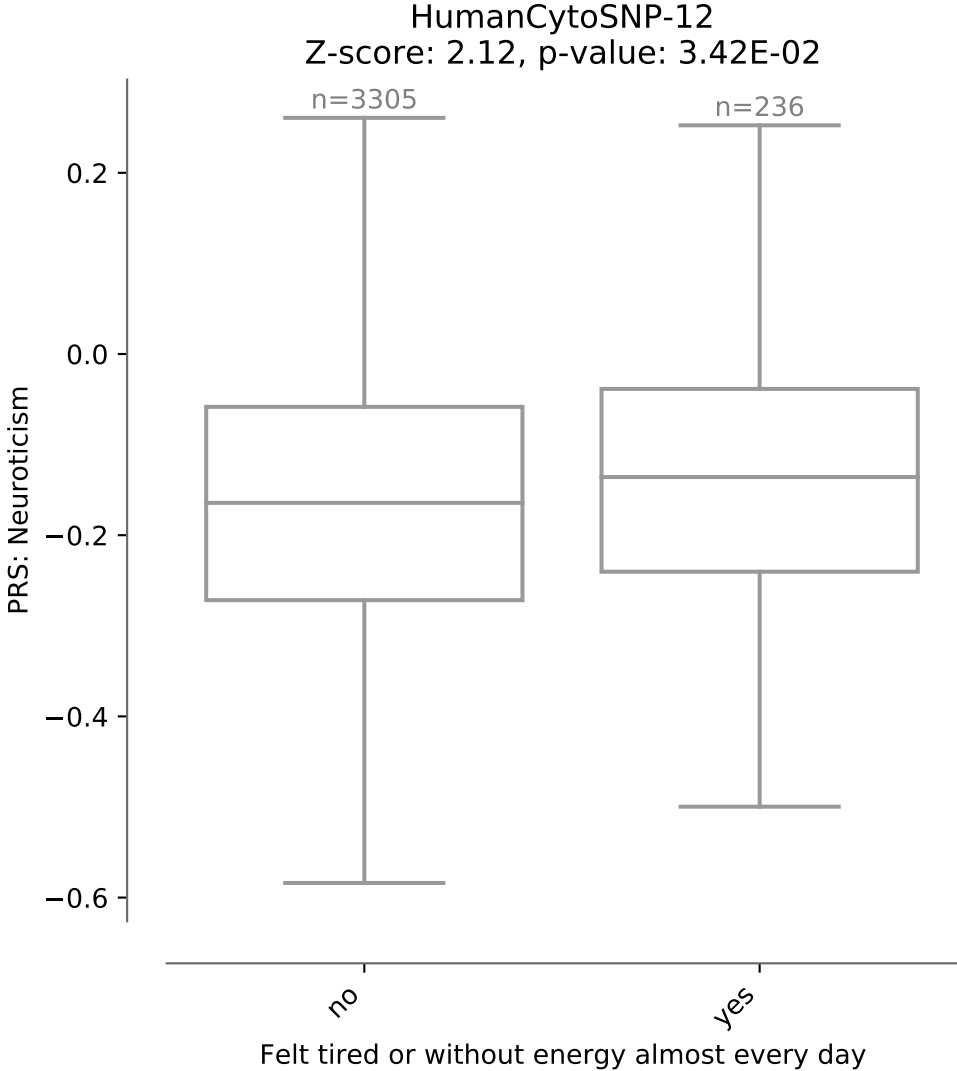

Felt worthless or guilty almost every day  
PGS: Life satisfaction  
Meta analysis Z-score: -5.54, p-value: 2.95E-08

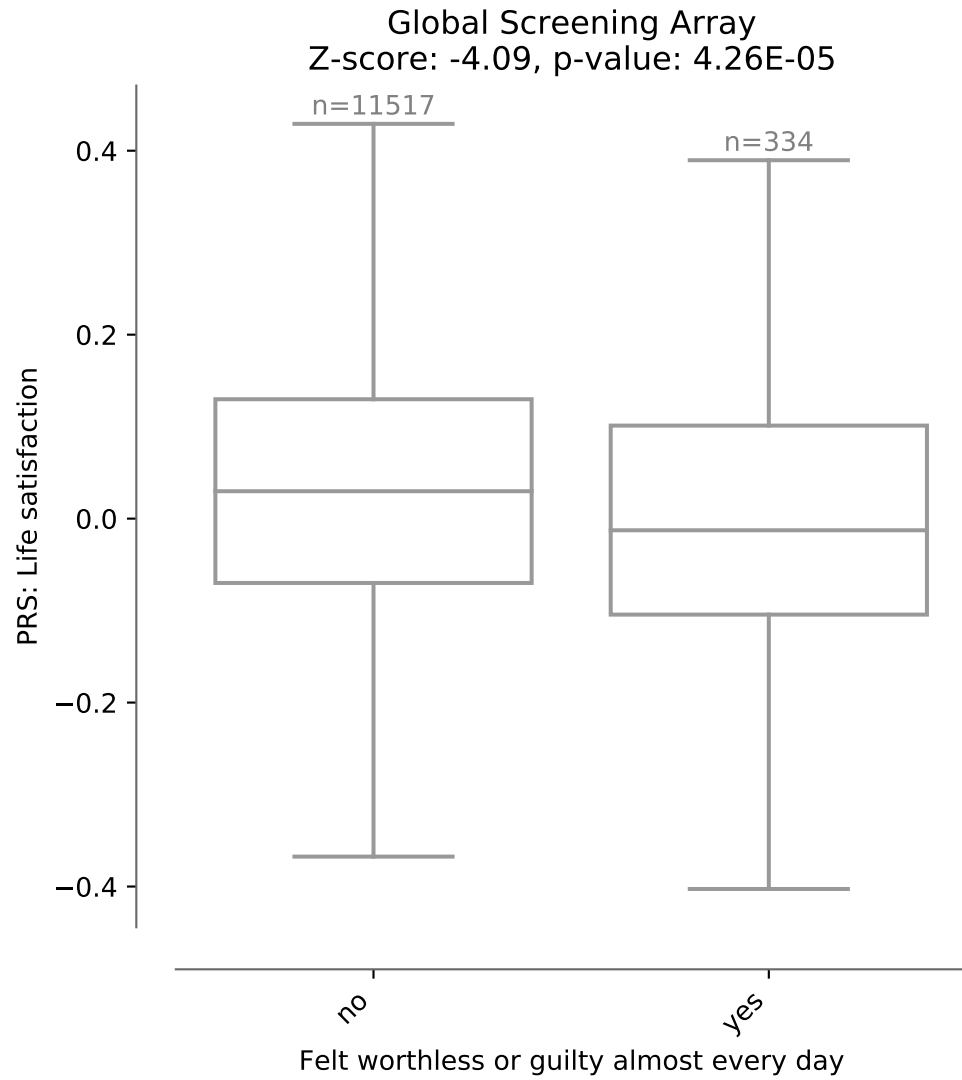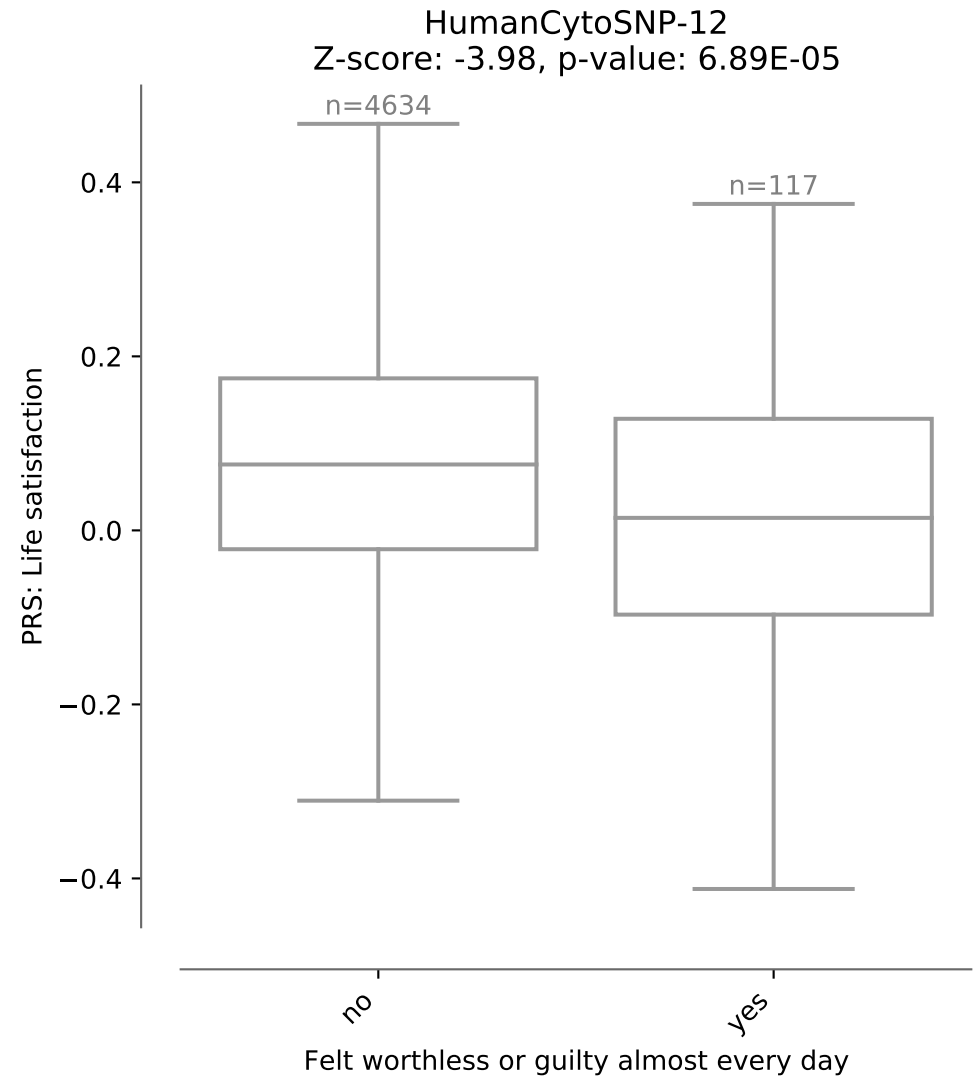

Pre-pandemic (moderate) intensity physical activity  
PGS: Accelerometer-based physical activity  
Meta analysis Z-score: 5.32, p-value: 1.01E-07

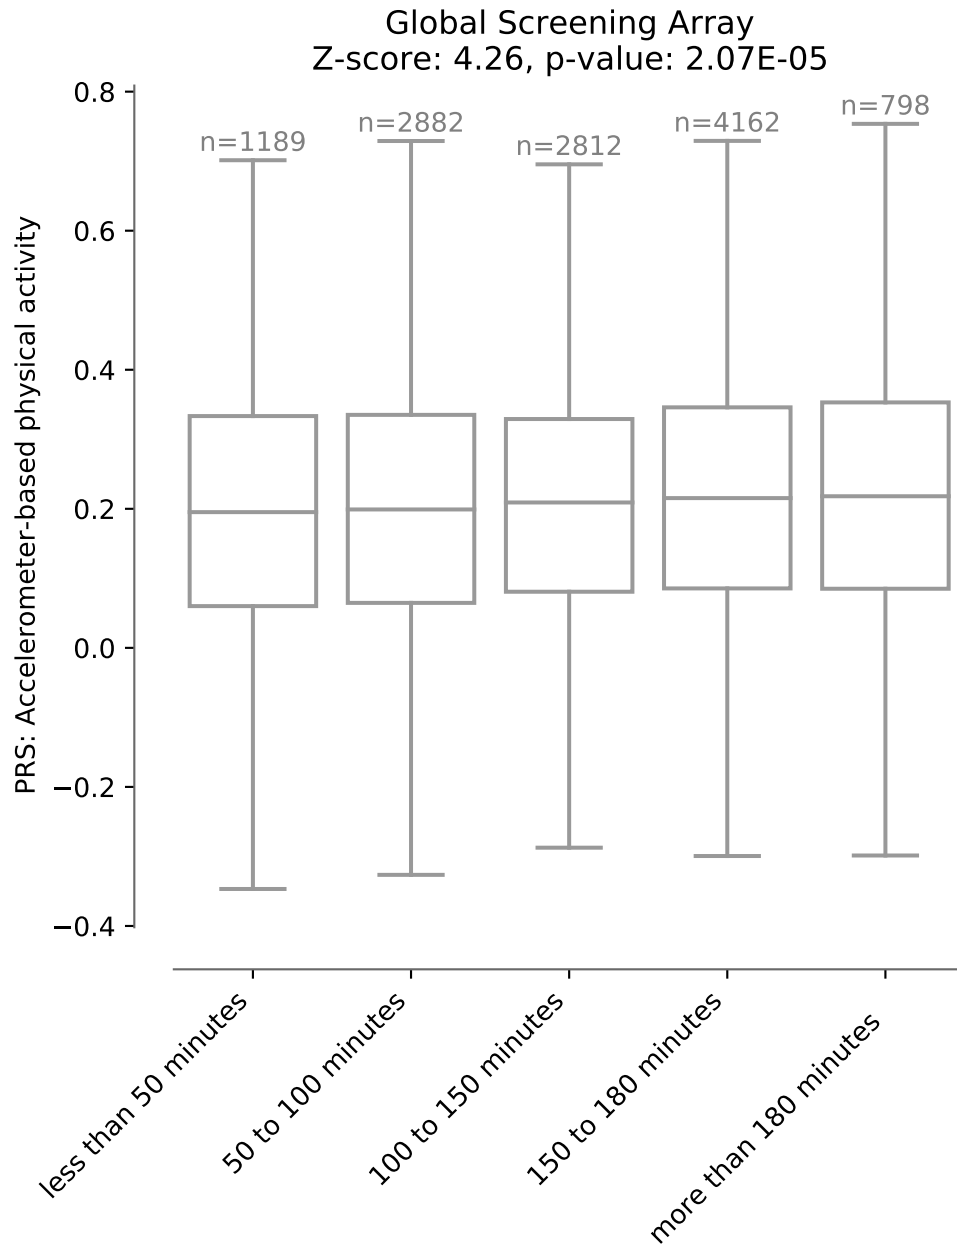

Pre-pandemic (moderate) intensity physical activity

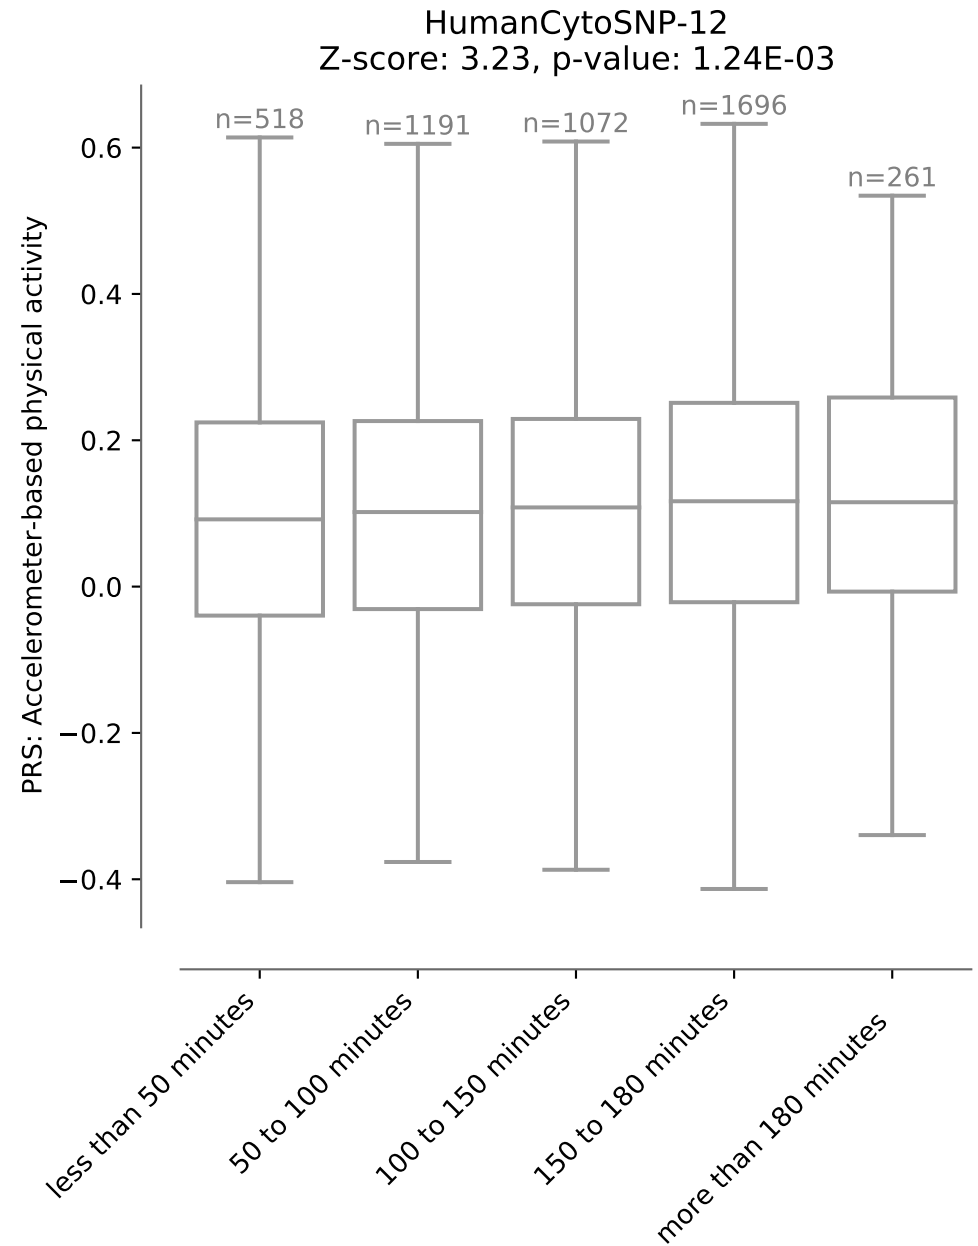

Pre-pandemic (moderate) intensity physical activity

Pre-pandemic (moderate) intensity physical activity

PGS: BMI

Meta analysis Z-score: -4.58, p-value: 4.76E-06

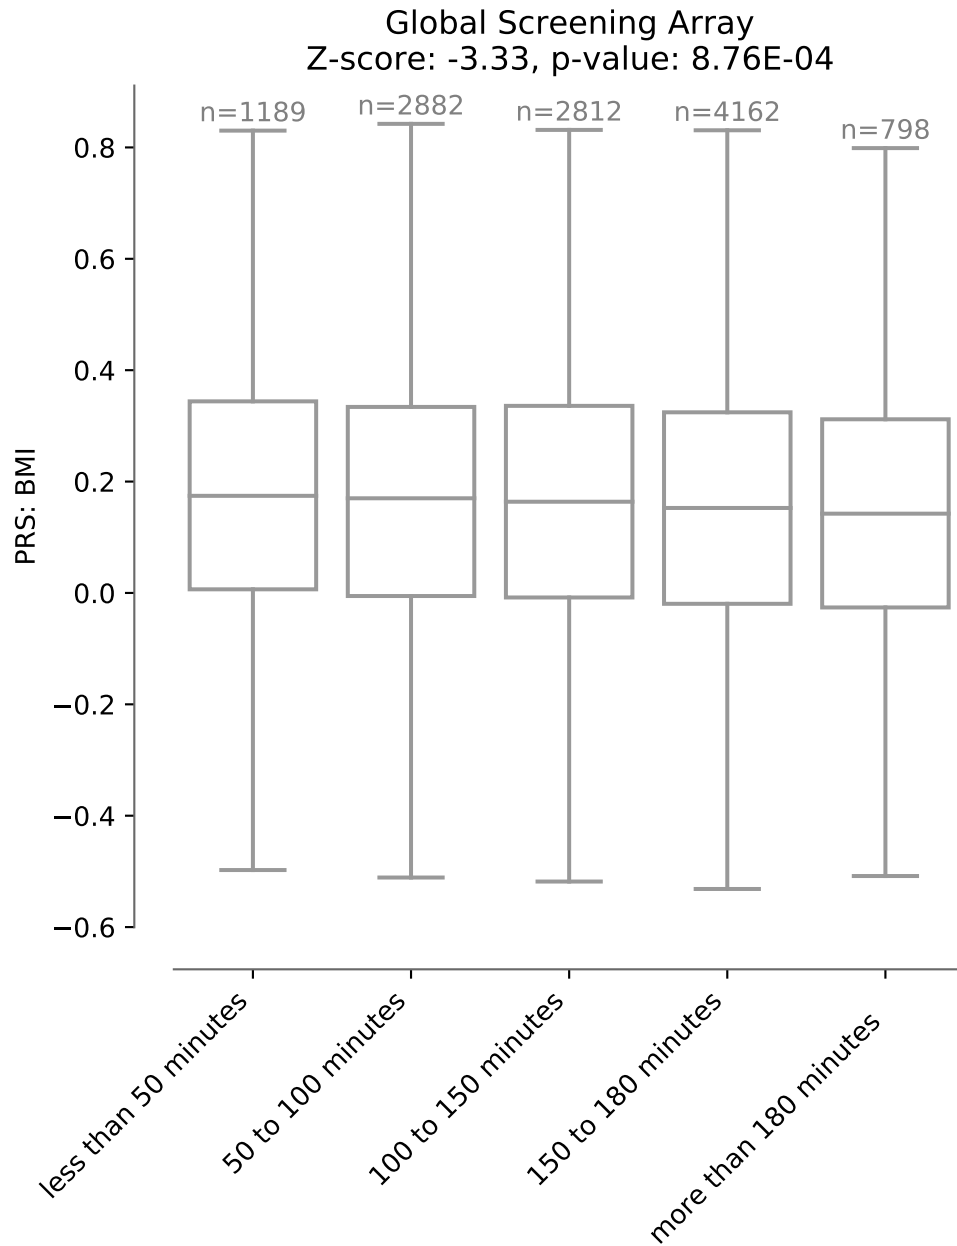

Pre-pandemic (moderate) intensity physical activity

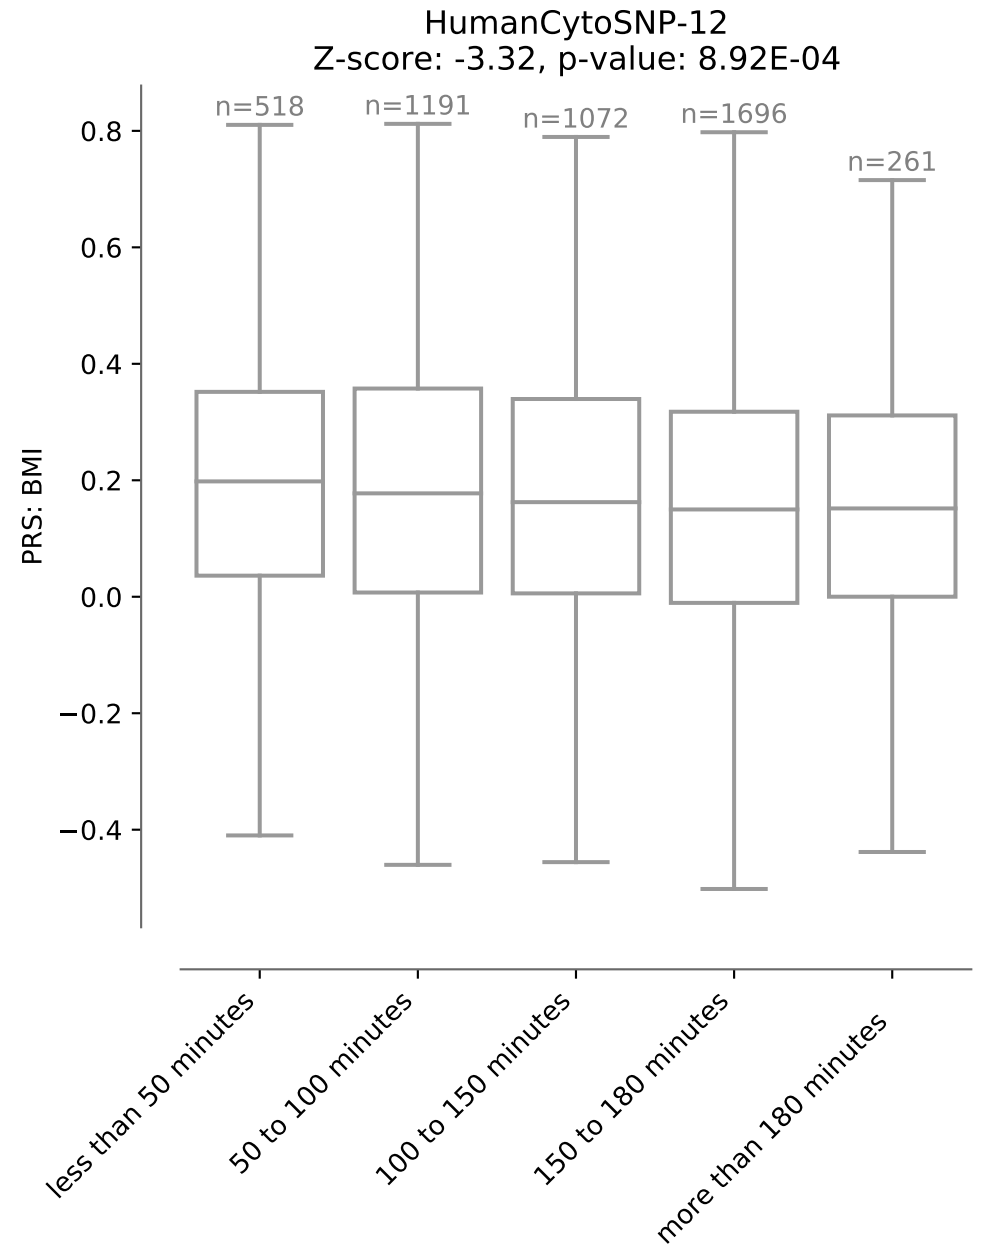

Pre-pandemic (moderate) intensity physical activity

Pre-pandemic (moderate) intensity physical activity  
PGS: Educational attainment  
Meta analysis Z-score: 5.52, p-value: 3.40E-08

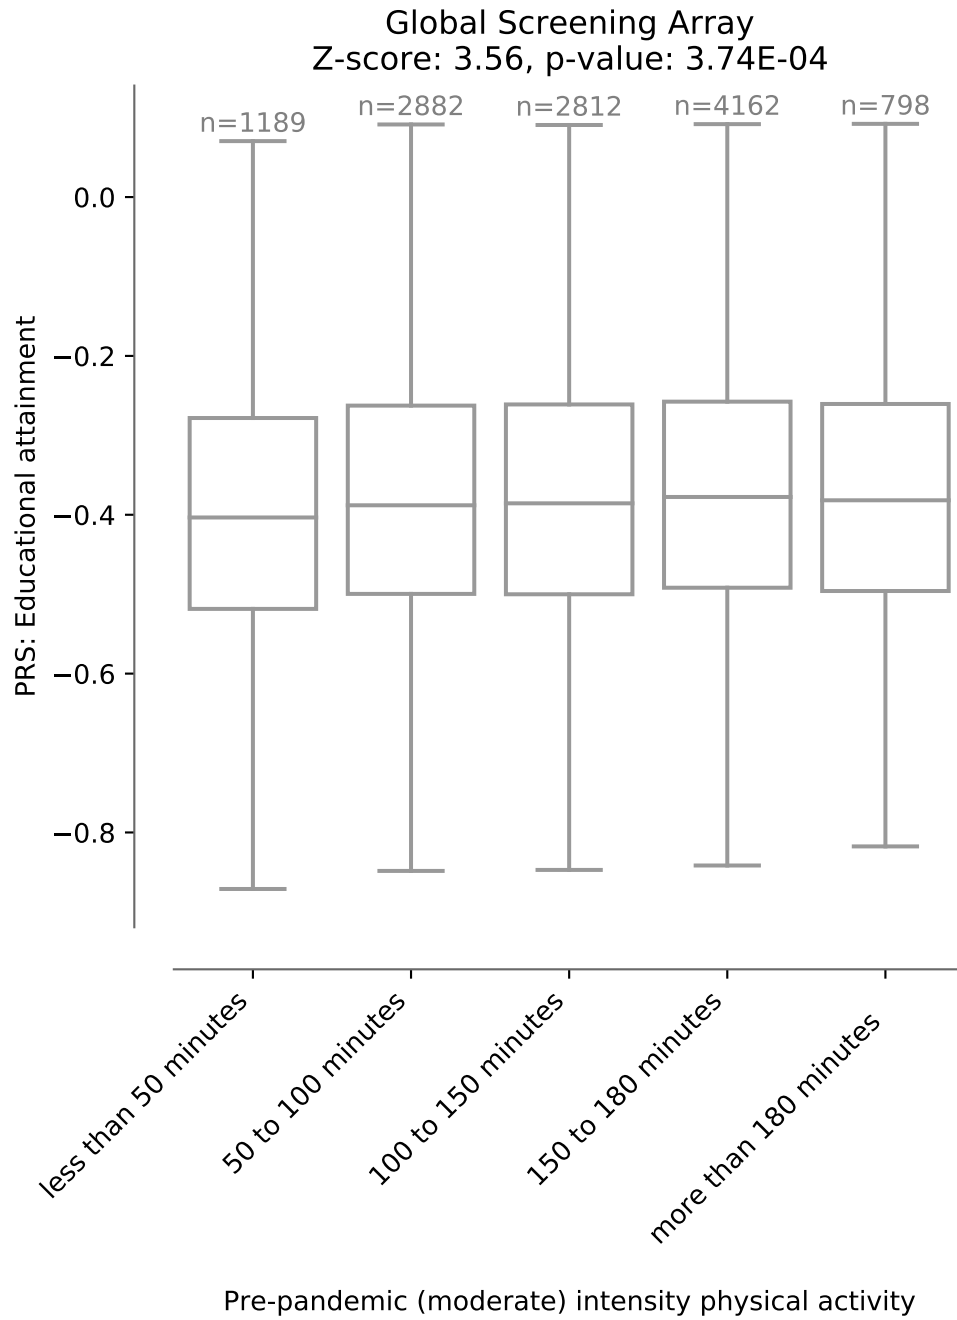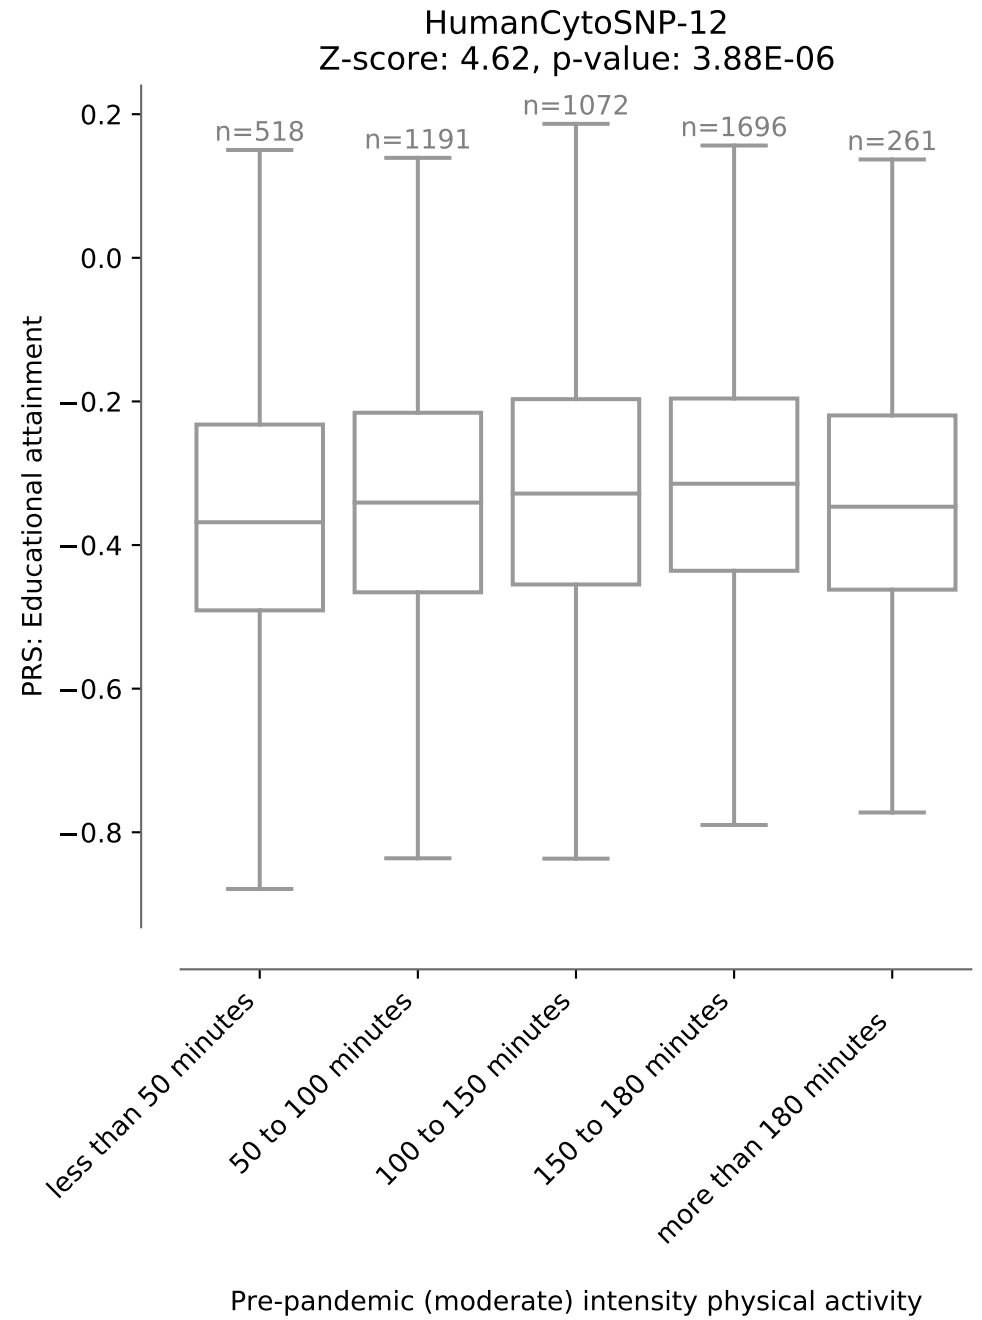

Noticeable appetite change or unintended weight change

PGS: BMI

Meta analysis Z-score: 5.36, p-value: 8.38E-08

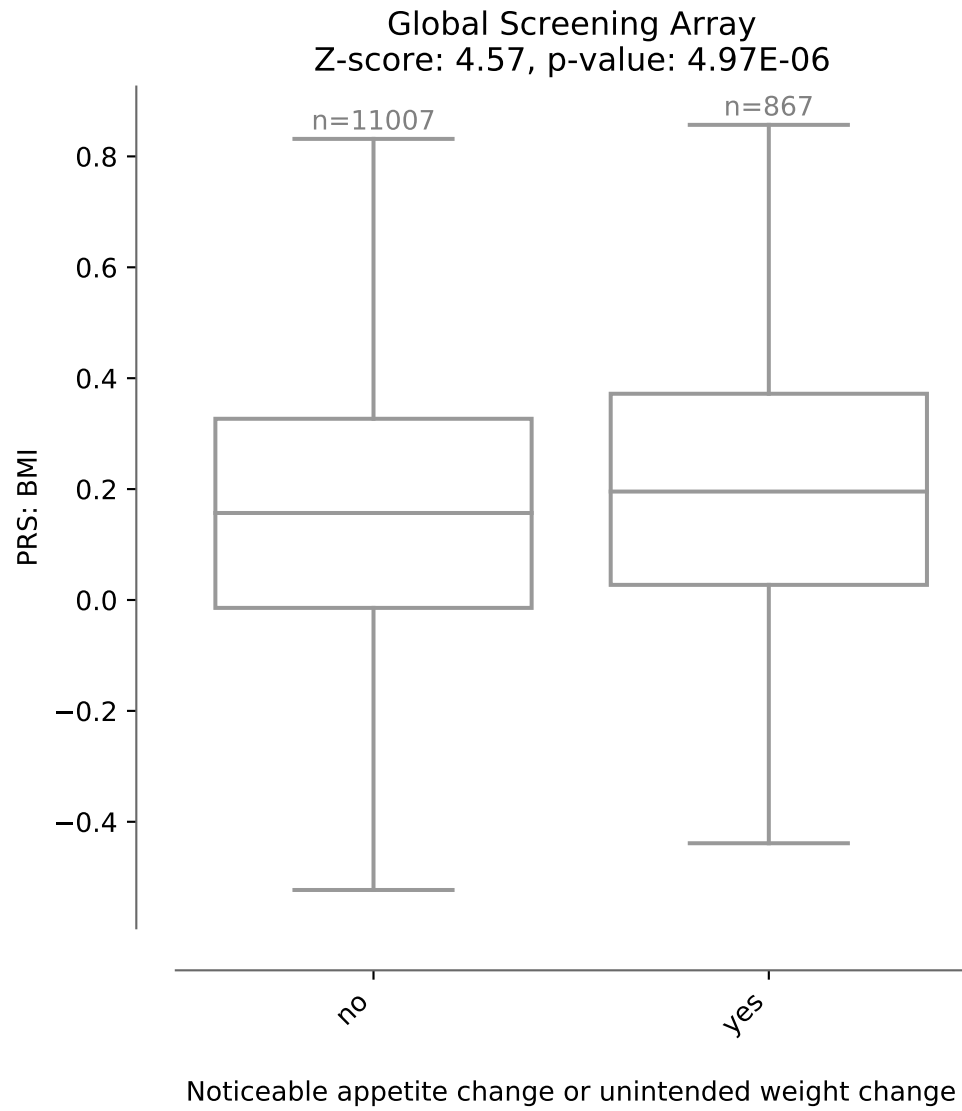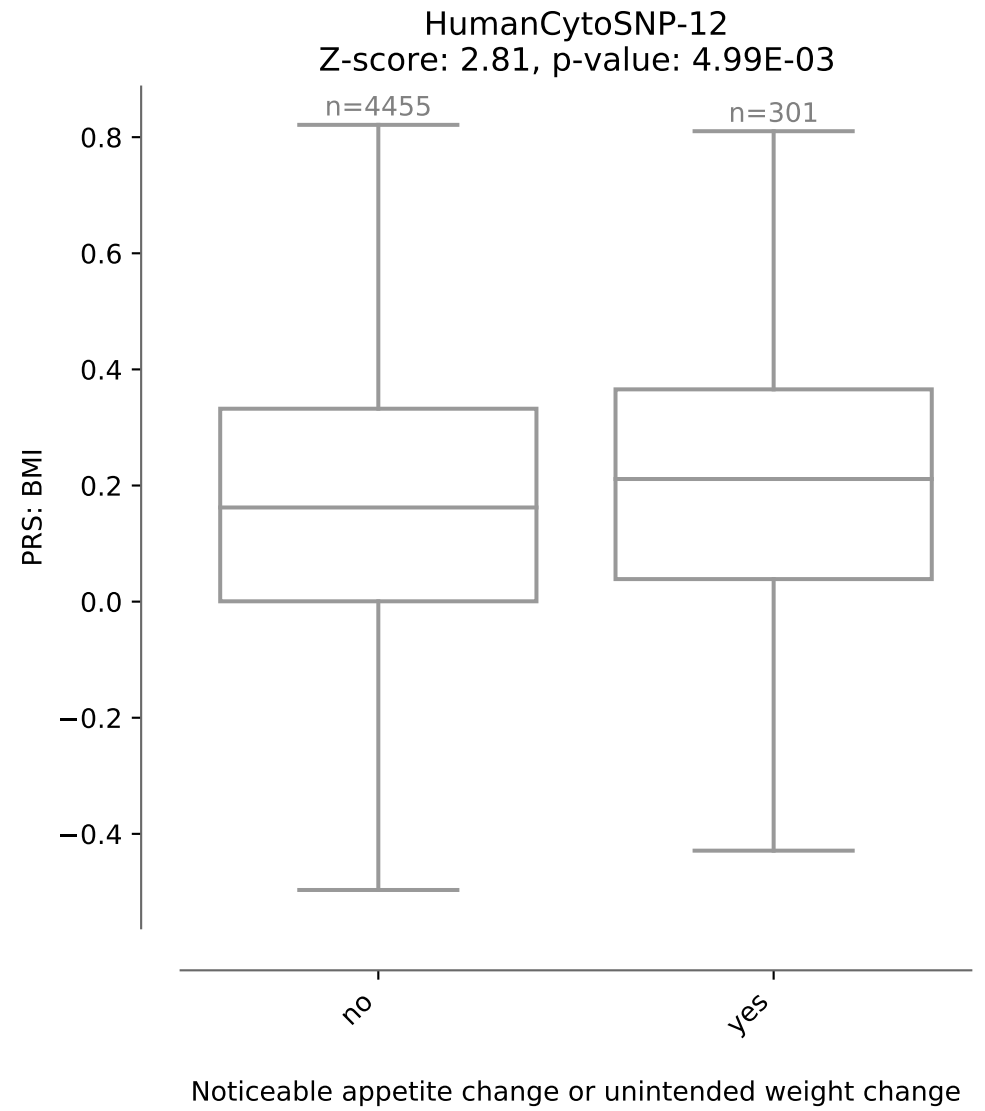

Self-assessment of personal health  
PGS: Depression  
Meta analysis Z-score: -4.68, p-value: 2.91E-06

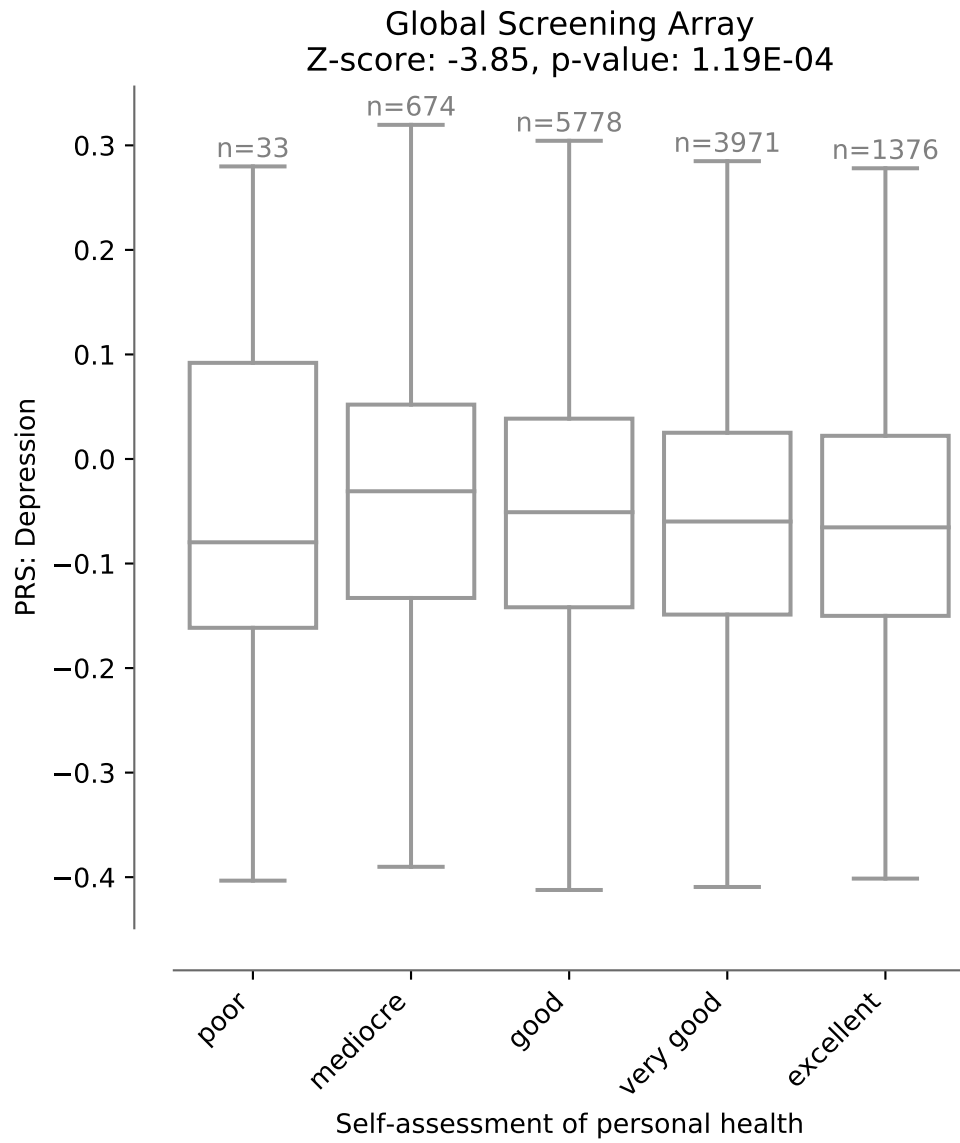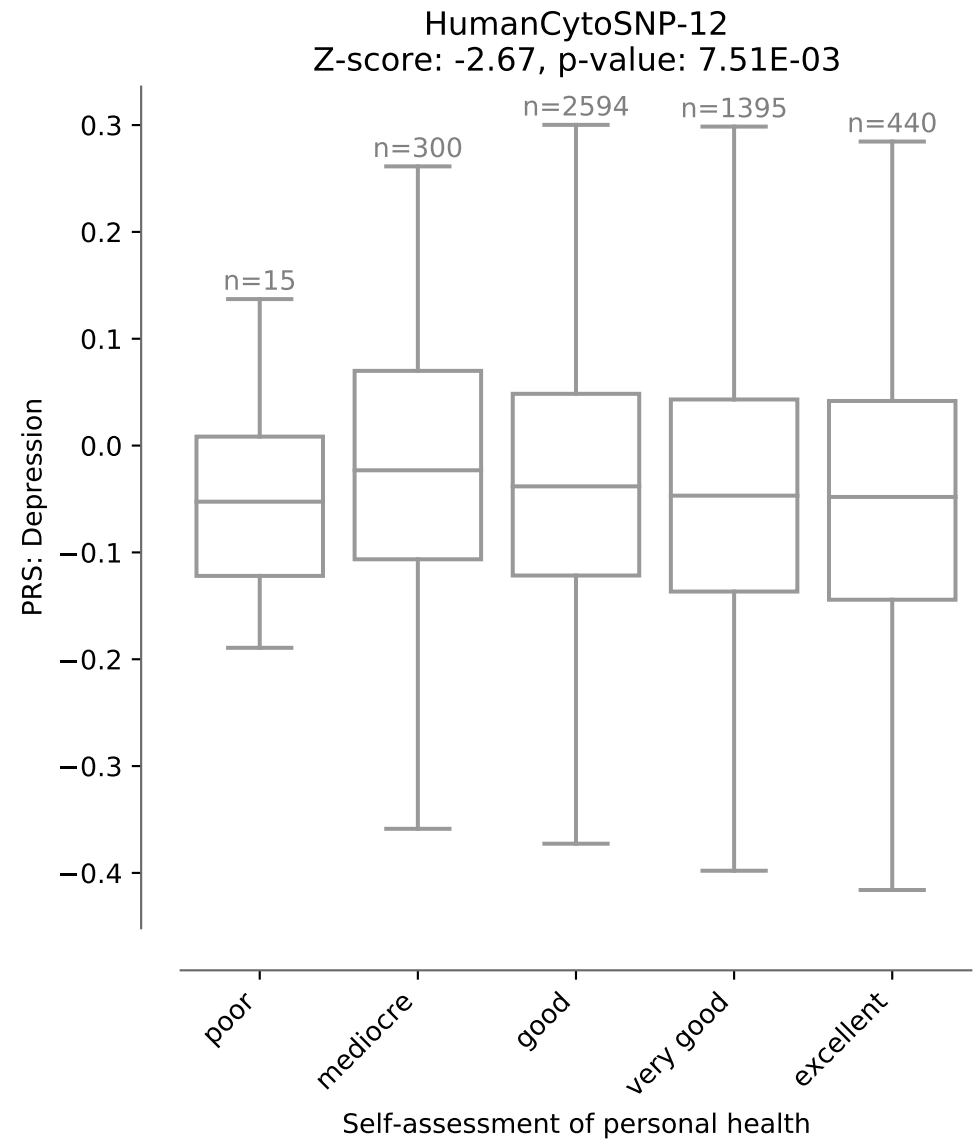



Self-assessment of personal health  
PGS: Educational attainment  
Meta analysis Z-score: 6.86, p-value: 6.93E-12

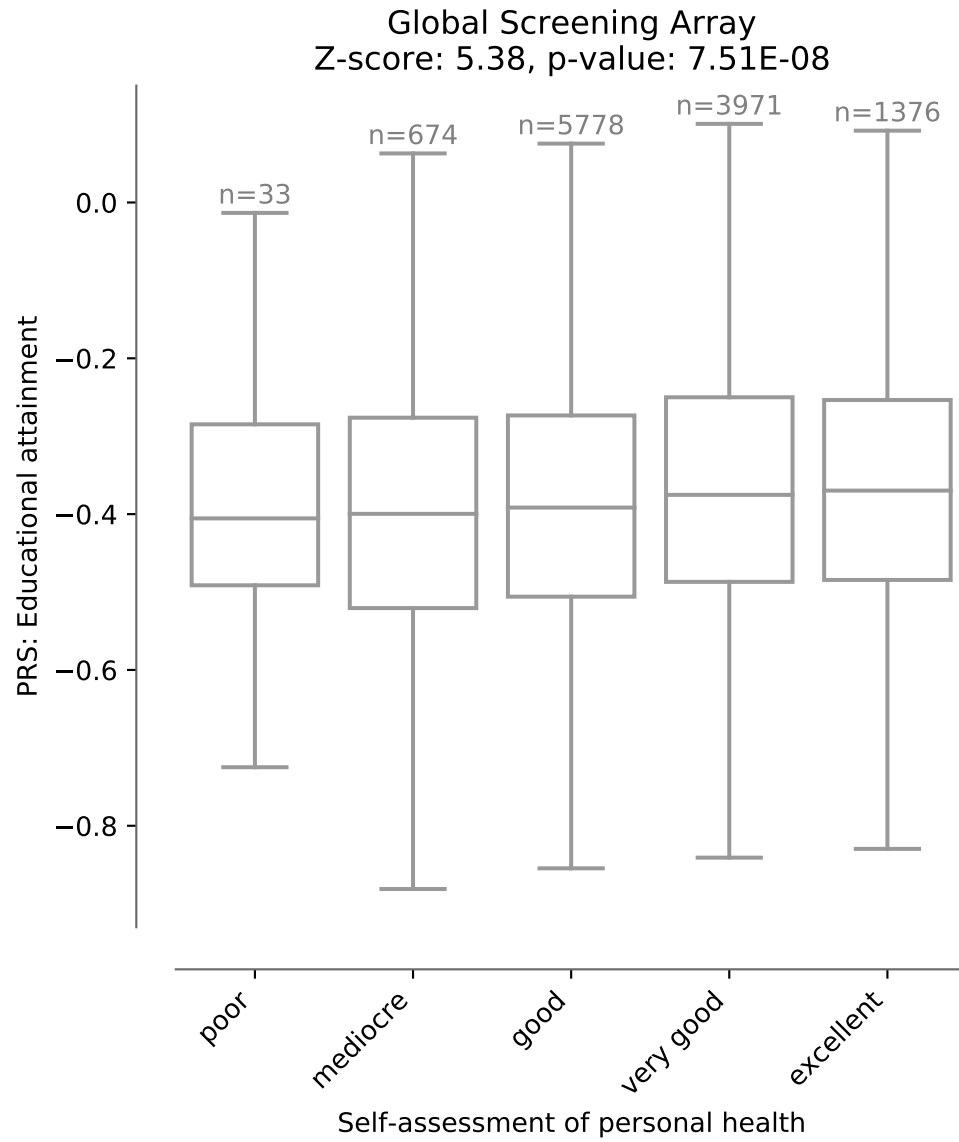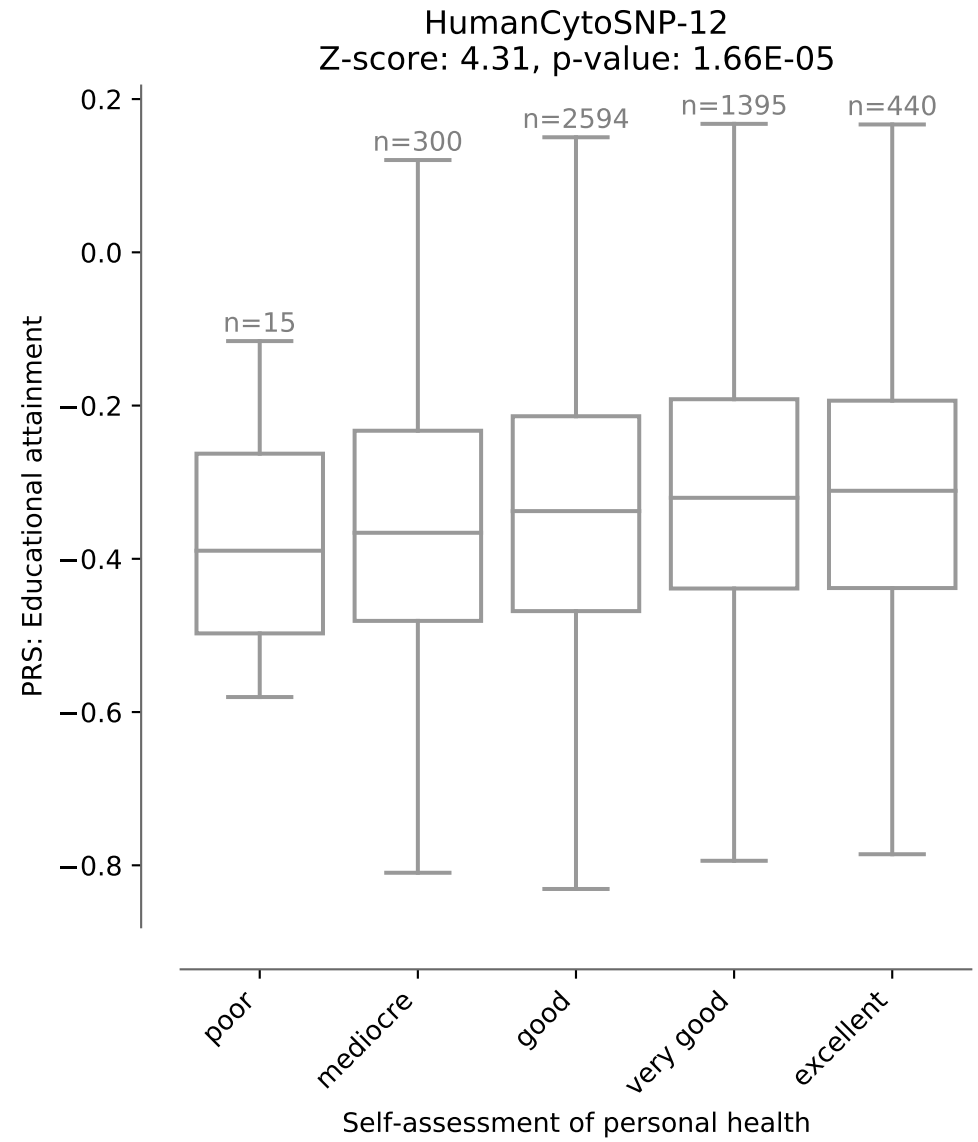

Self-assessment of personal health  
PGS: Life satisfaction  
Meta analysis Z-score: 8.96, p-value: 3.38E-19

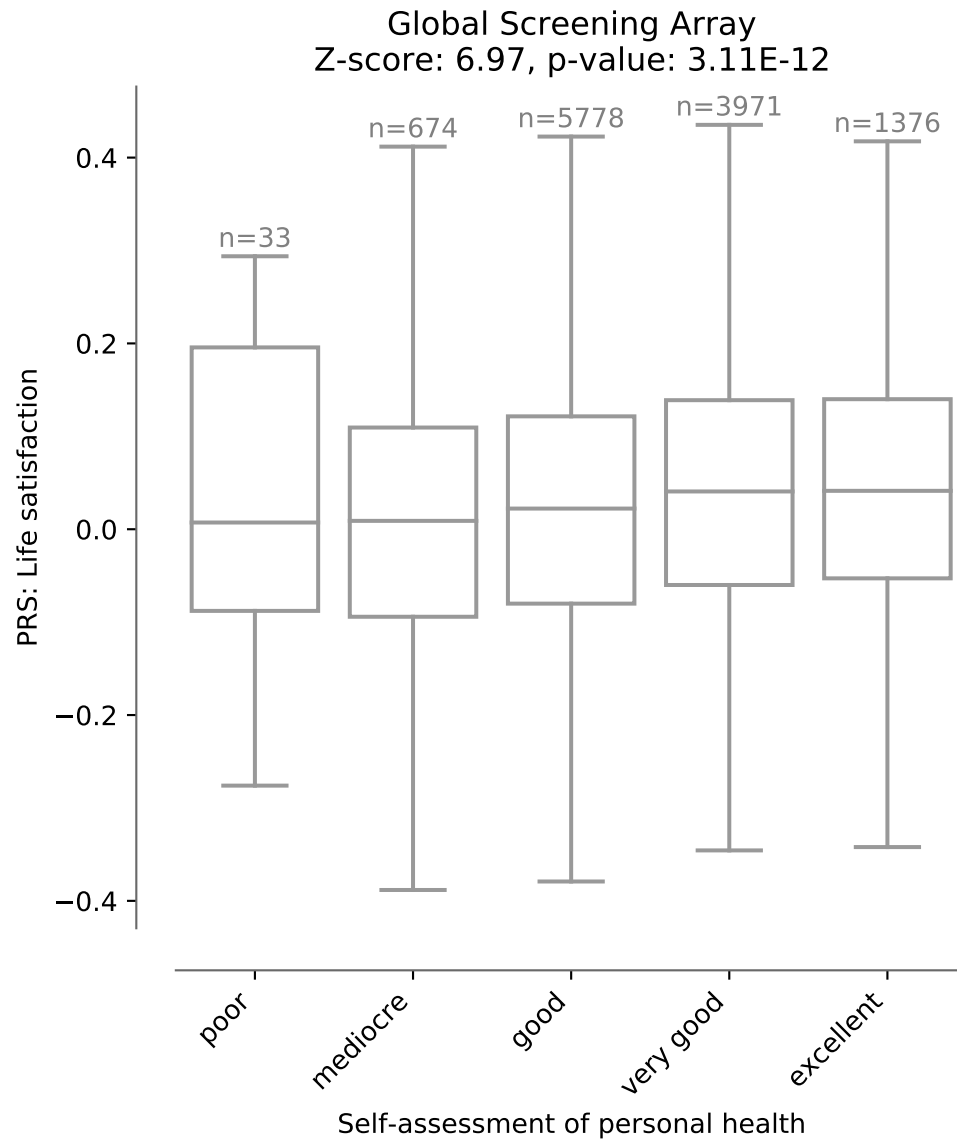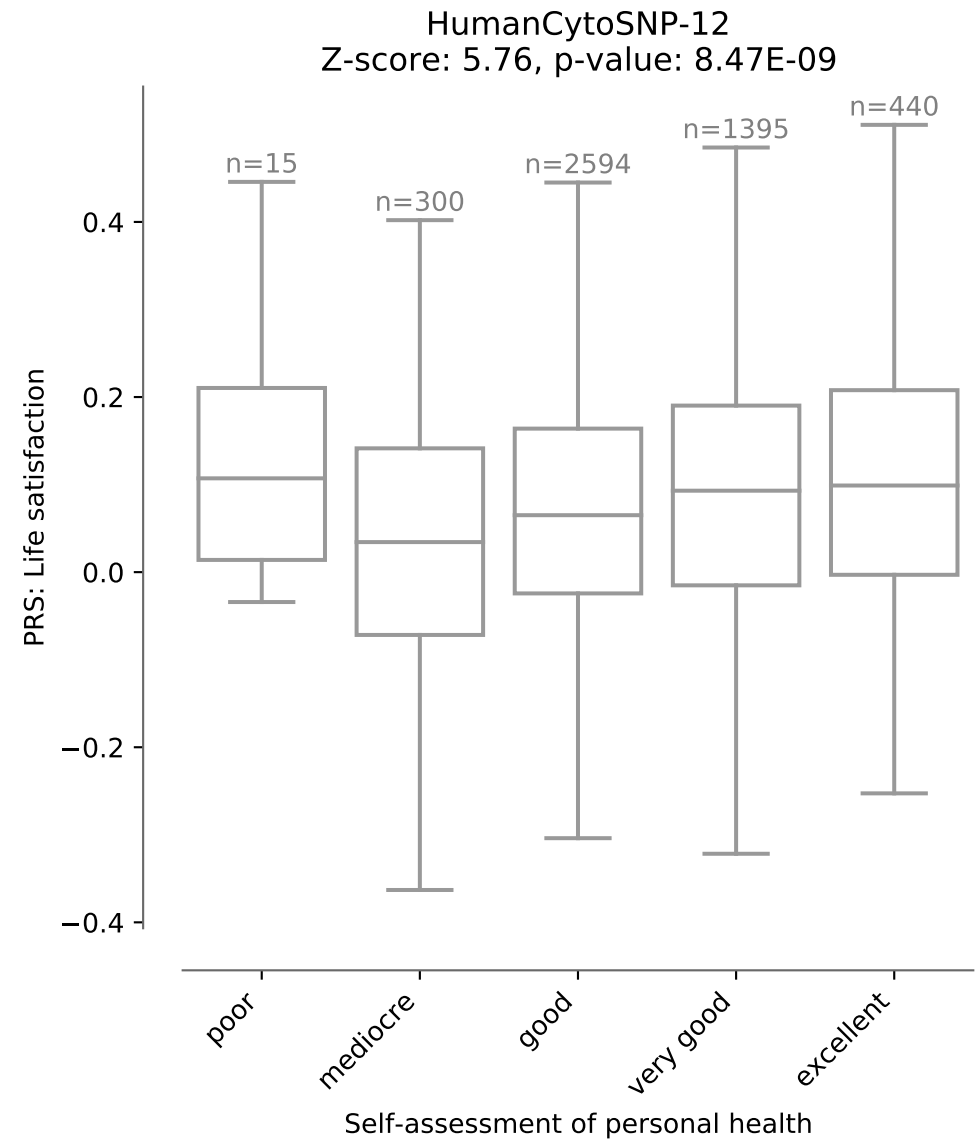

Self-assessment of personal health  
PGS: Neuroticism  
Meta analysis Z-score: -8.53, p-value: 1.45E-17

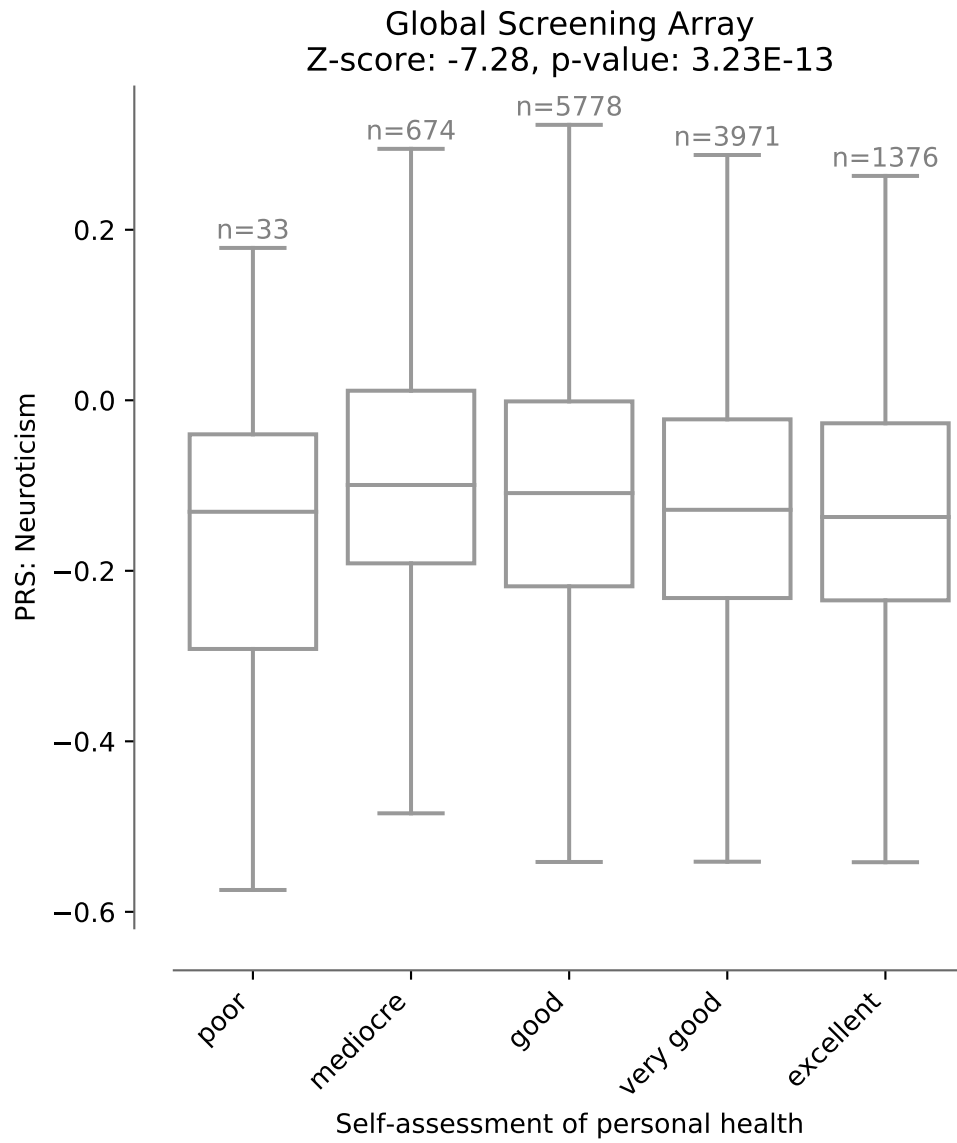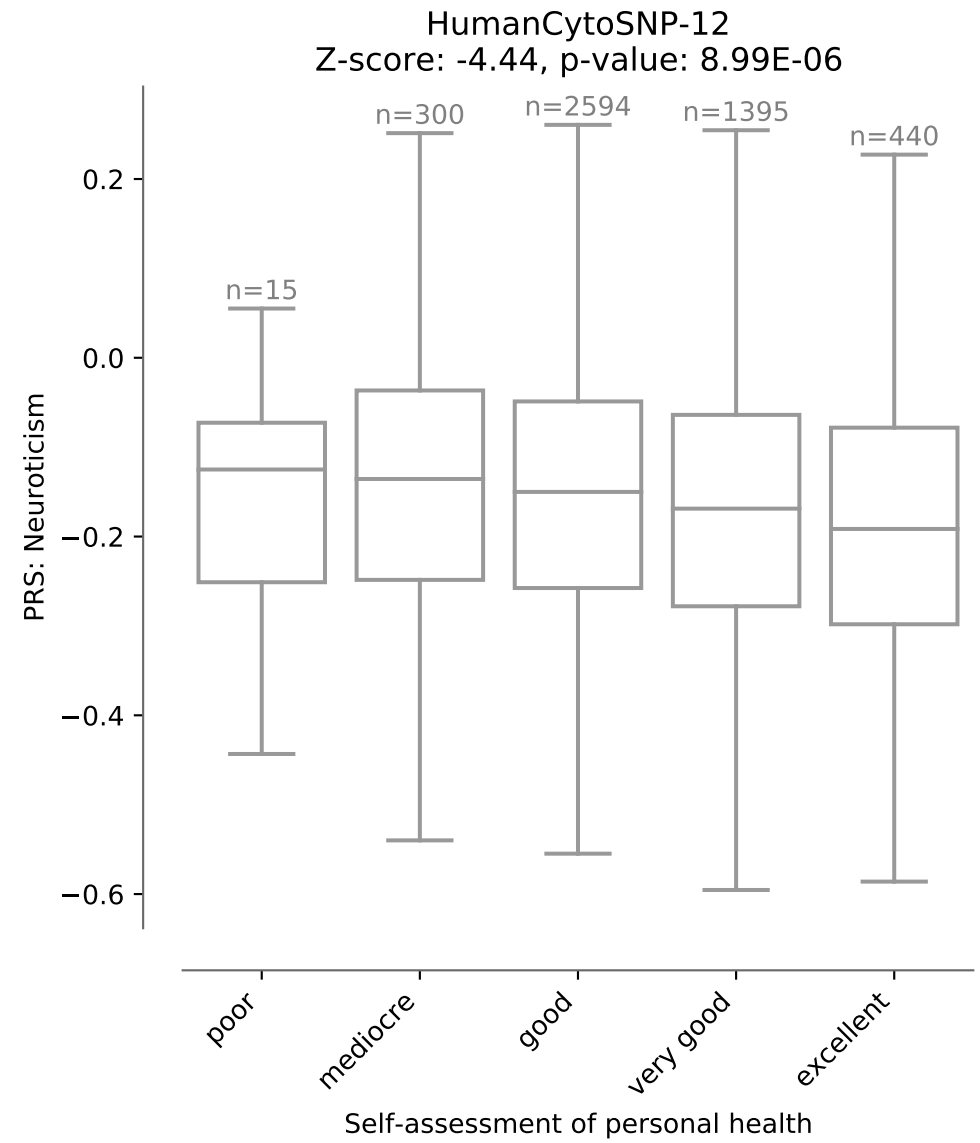

Self-assessment of fitness  
PGS: Life satisfaction  
Meta analysis Z-score: 4.69, p-value: 2.75E-06

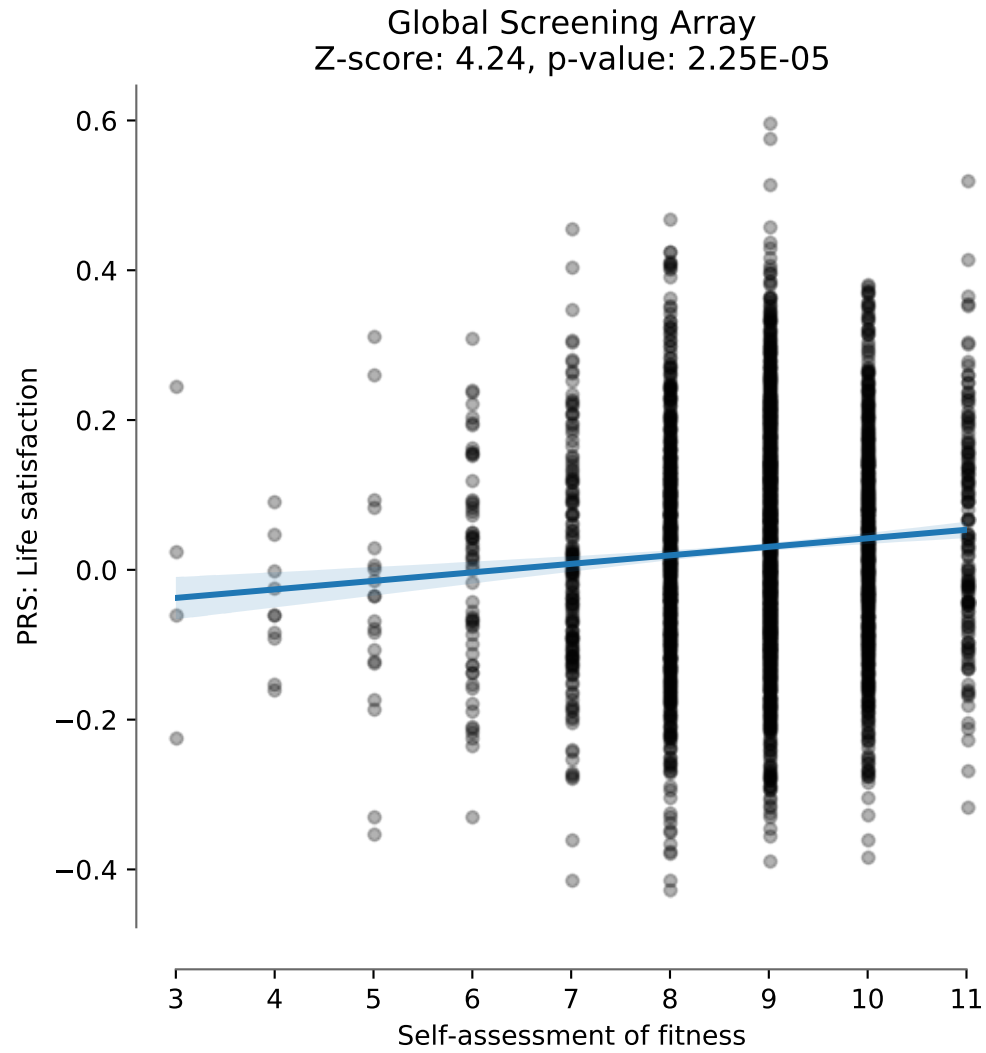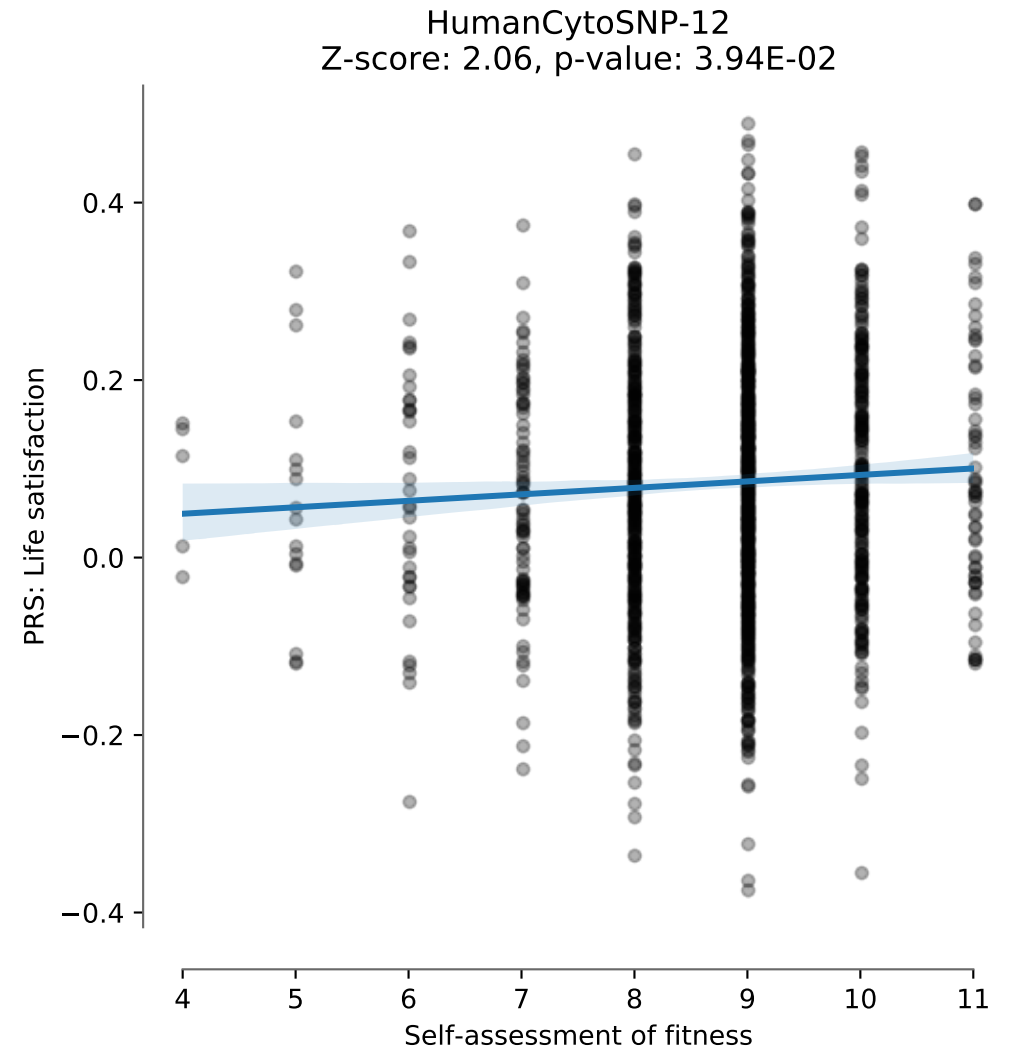

Has household member working outside the house  
PGS: Educational attainment  
Meta analysis Z-score: -7.29, p-value: 3.12E-13

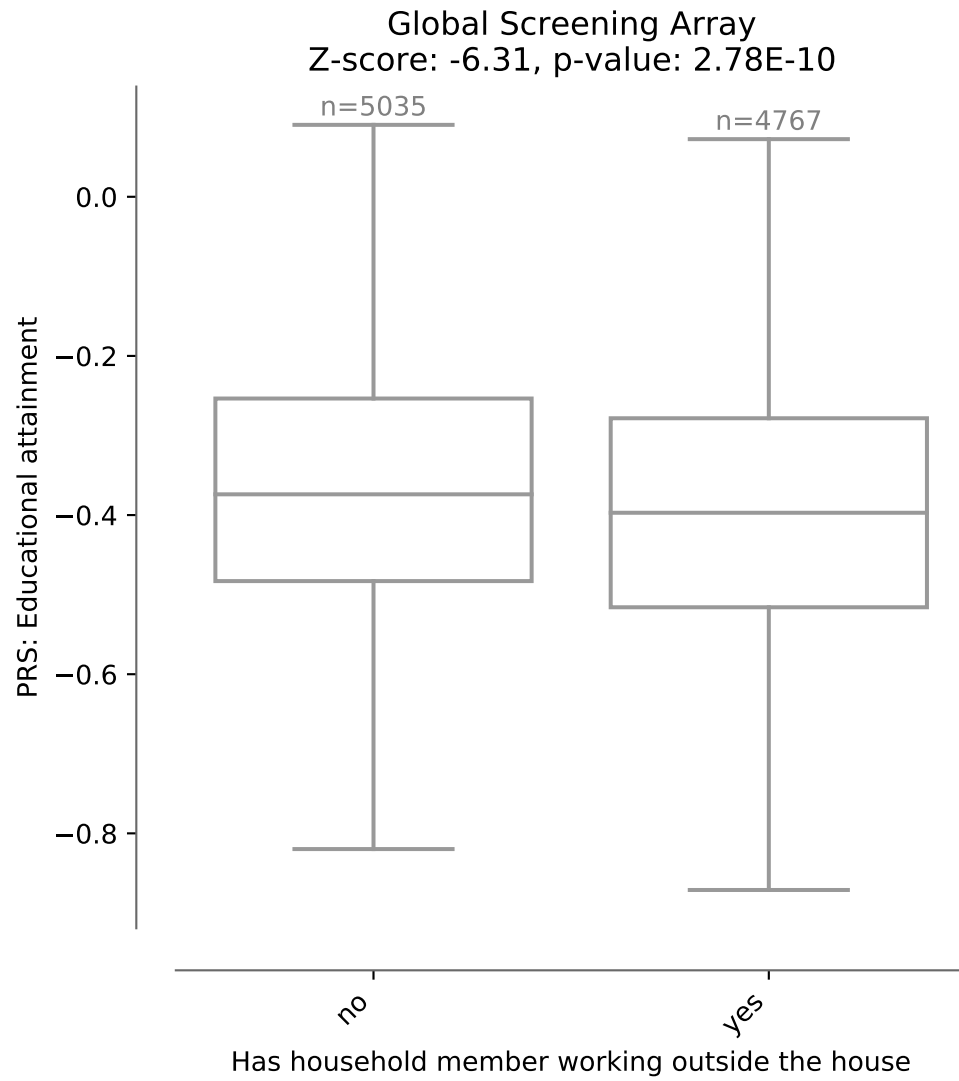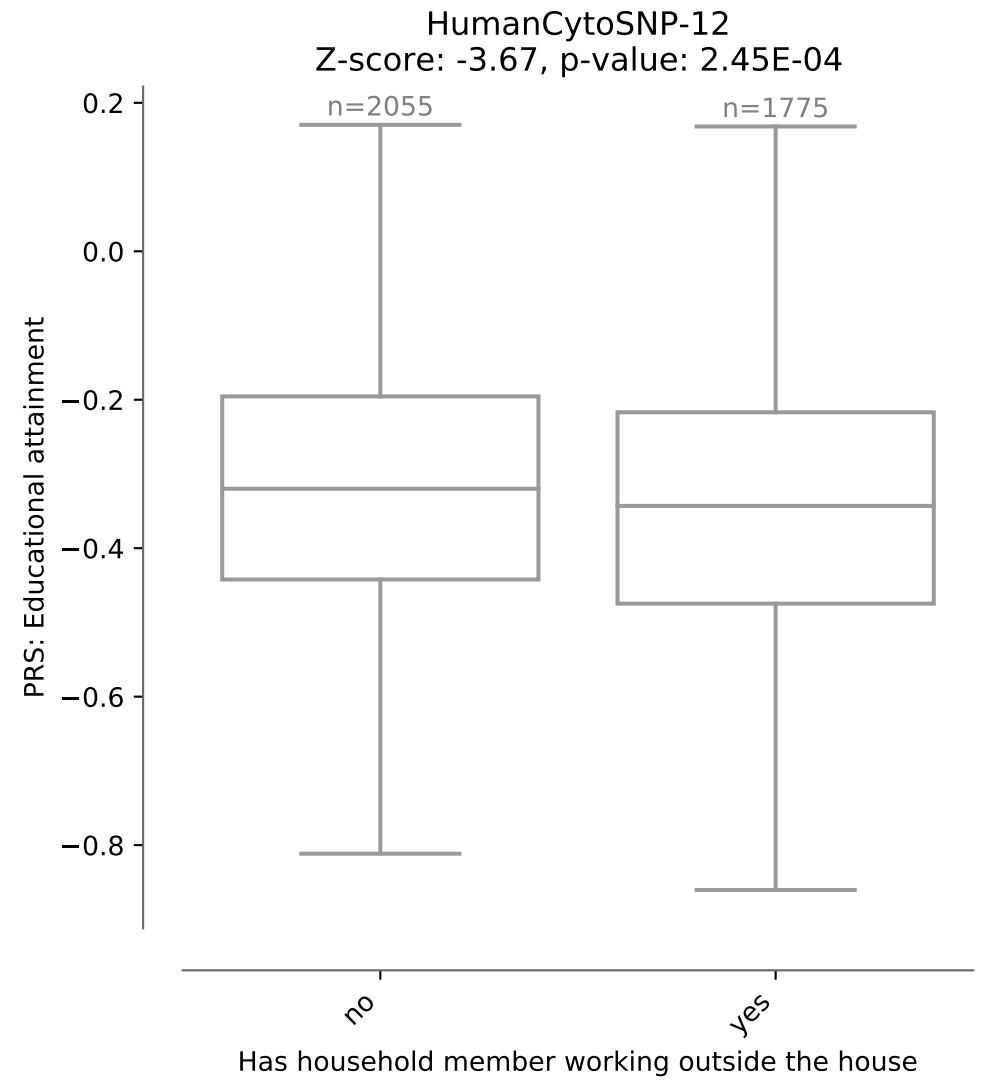

Felt heaviness in arms or legs  
PGS: Depression  
Meta analysis Z-score: 4.57, p-value: 4.92E-06

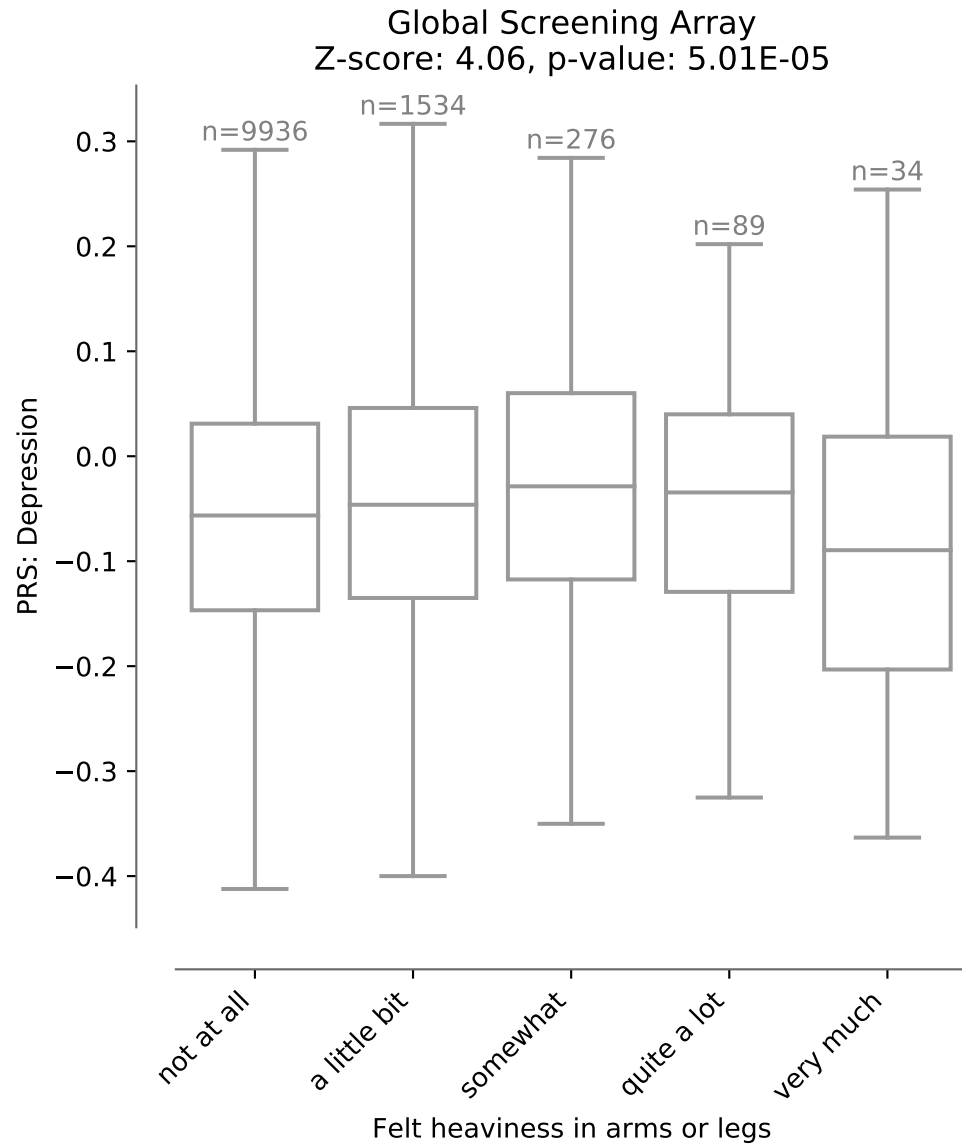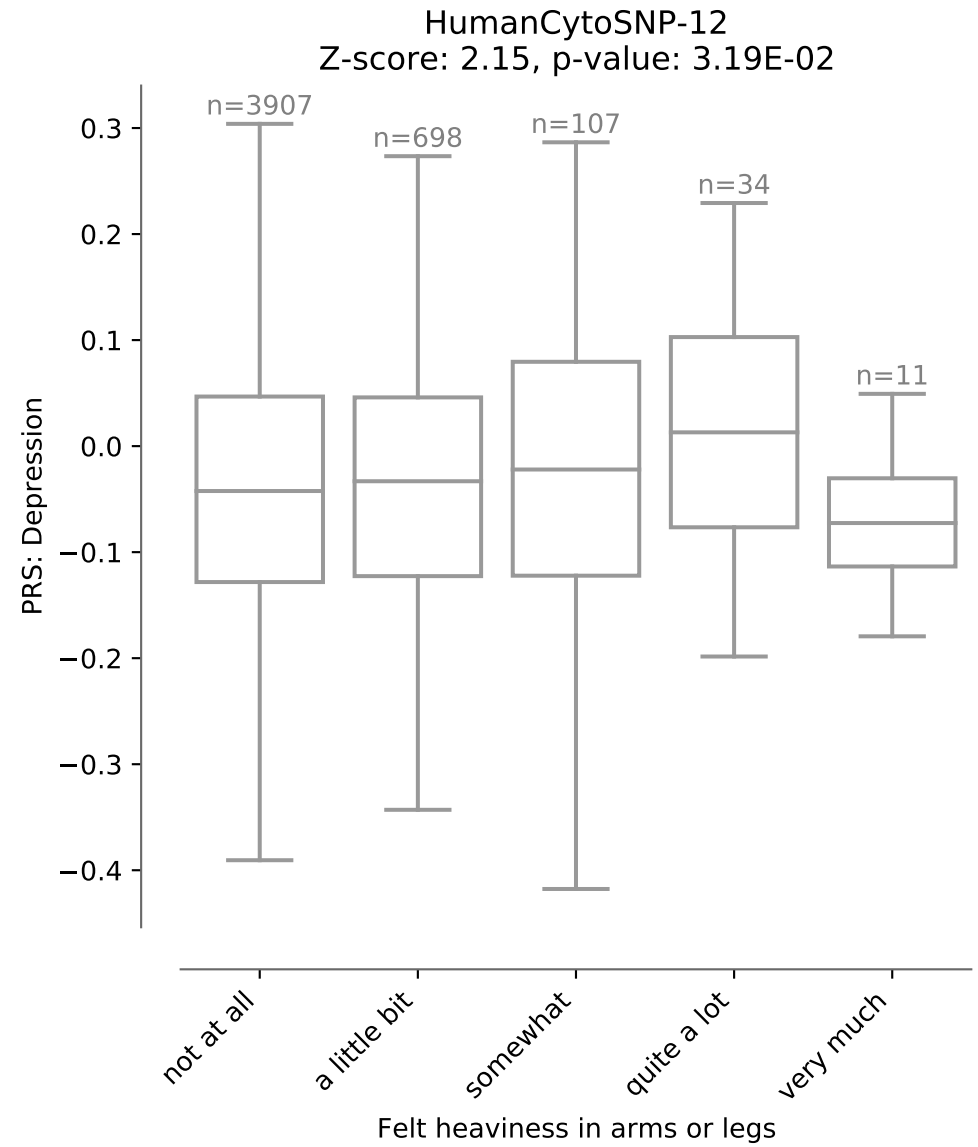

Felt heaviness in arms or legs  
PGS: Life satisfaction  
Meta analysis Z-score: -6.04, p-value: 1.54E-09

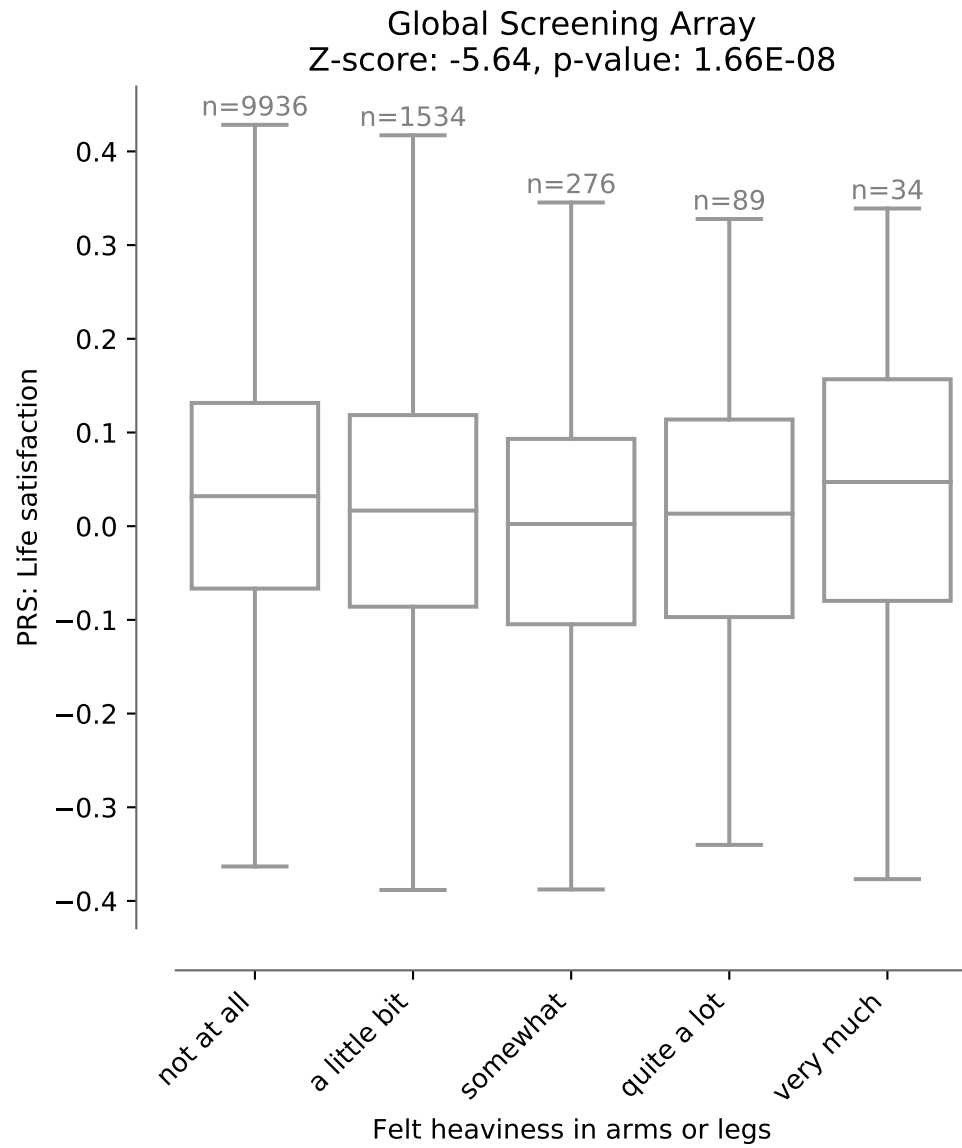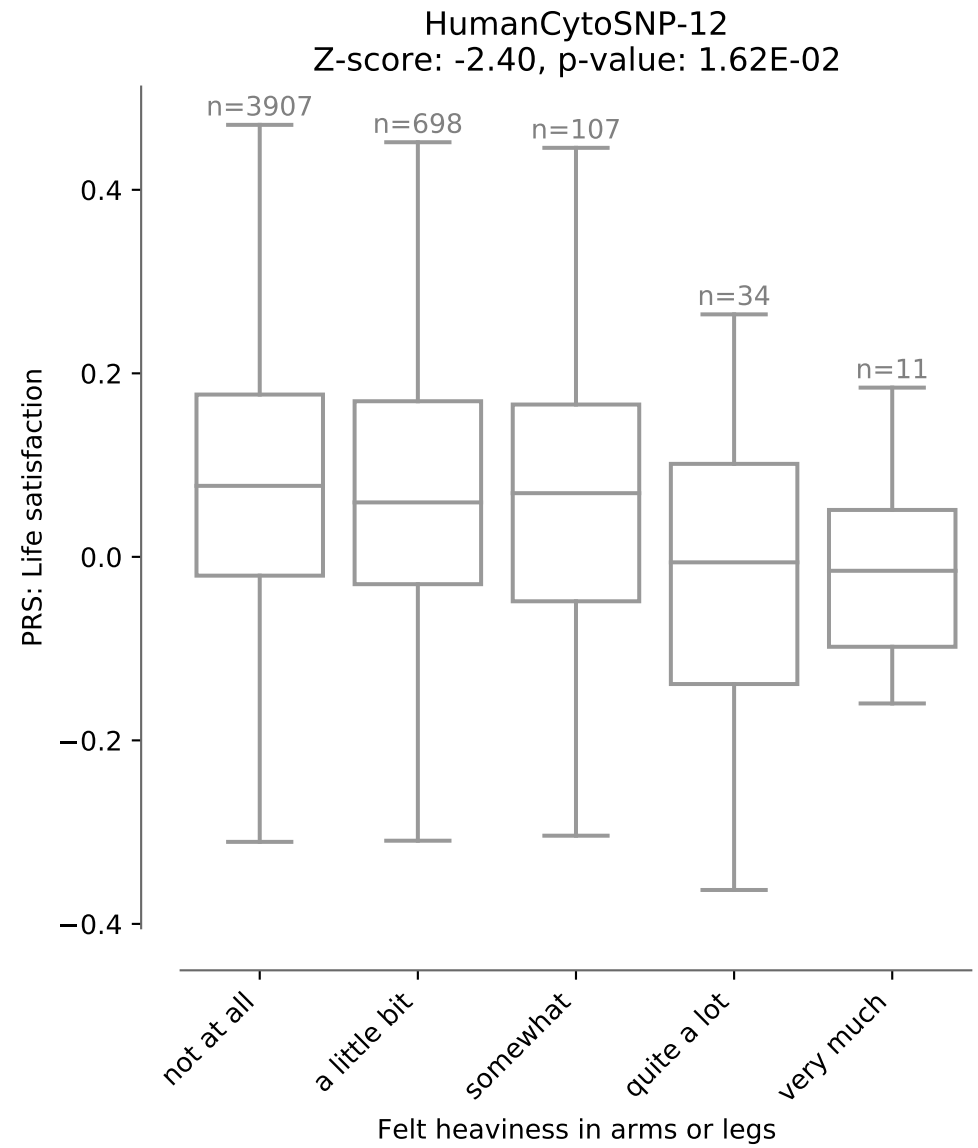

Felt heaviness in arms or legs  
PGS: Neuroticism  
Meta analysis Z-score: 5.68, p-value: 1.34E-08

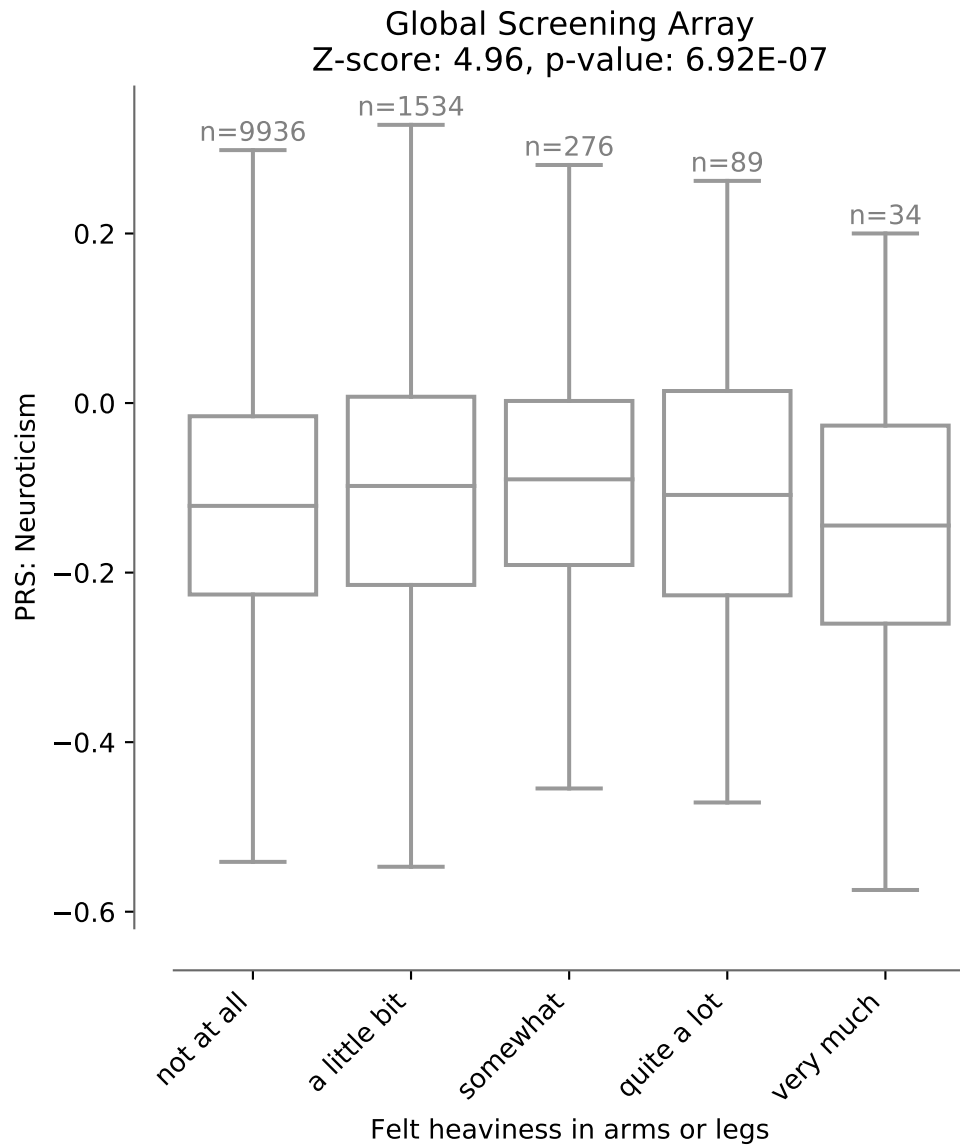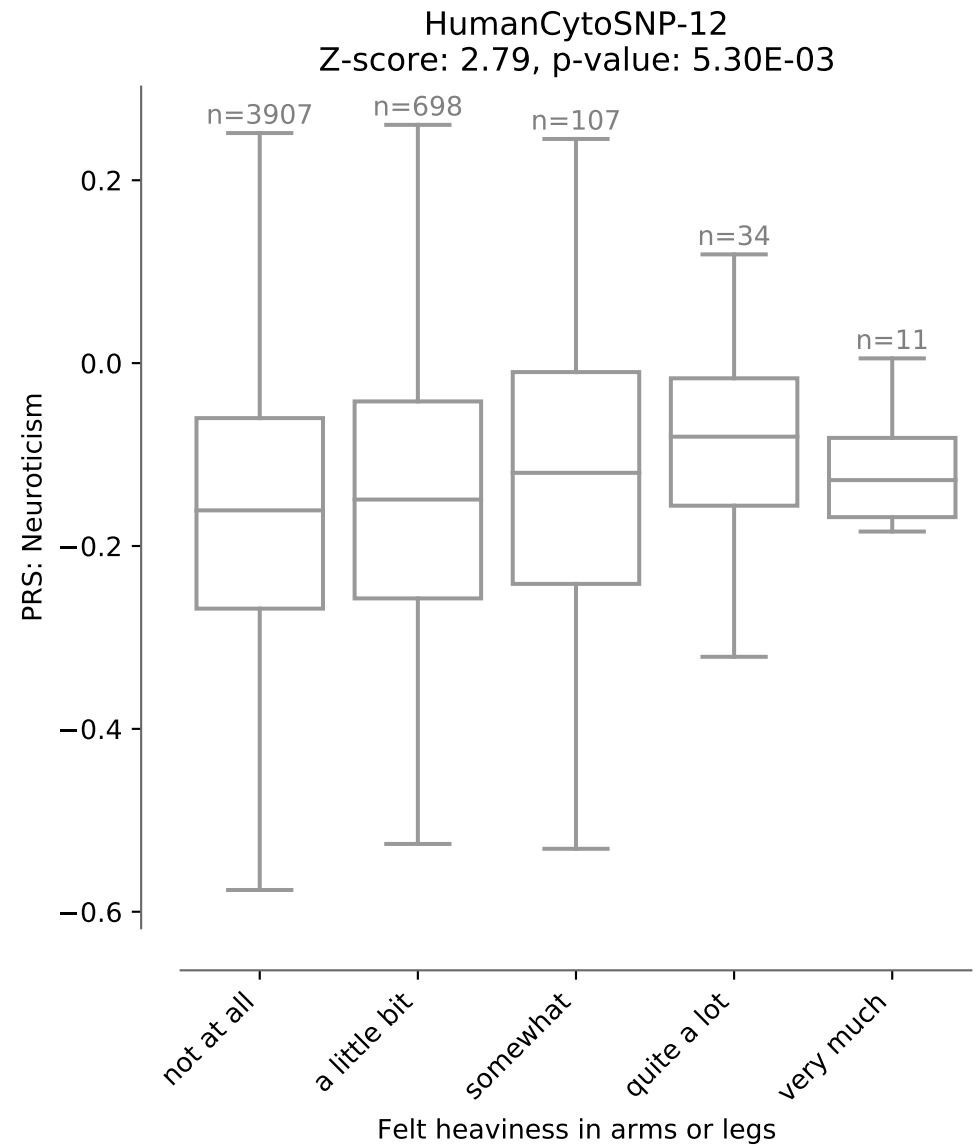

Supplement: pgen.1010135.s016.pdf [file pgen.1010135.s016.pdf]
