# Supplementary material for: Increased genetic contribution to wellbeing during the COVID-19 pandemic
Source: PubMed Central journal article supplement (PMC9119461; doi:10.1371/journal.pgen.1010135), 2022-05-19
Supplement: pgen.1010135.s017.pdf [file pgen.1010135.s017.pdf]

# Model fitted on 'Quality of life' stratified by 'Life satisfaction'

Interaction P-value:  $3.1 \times 10^{-3}$  Z-score: 2.96

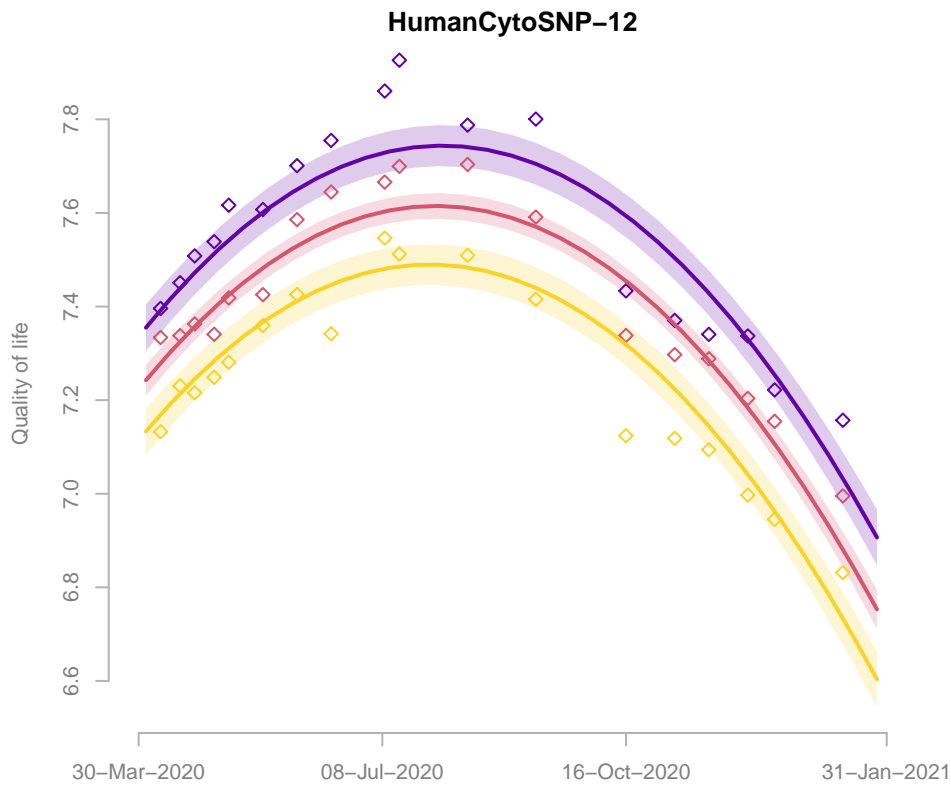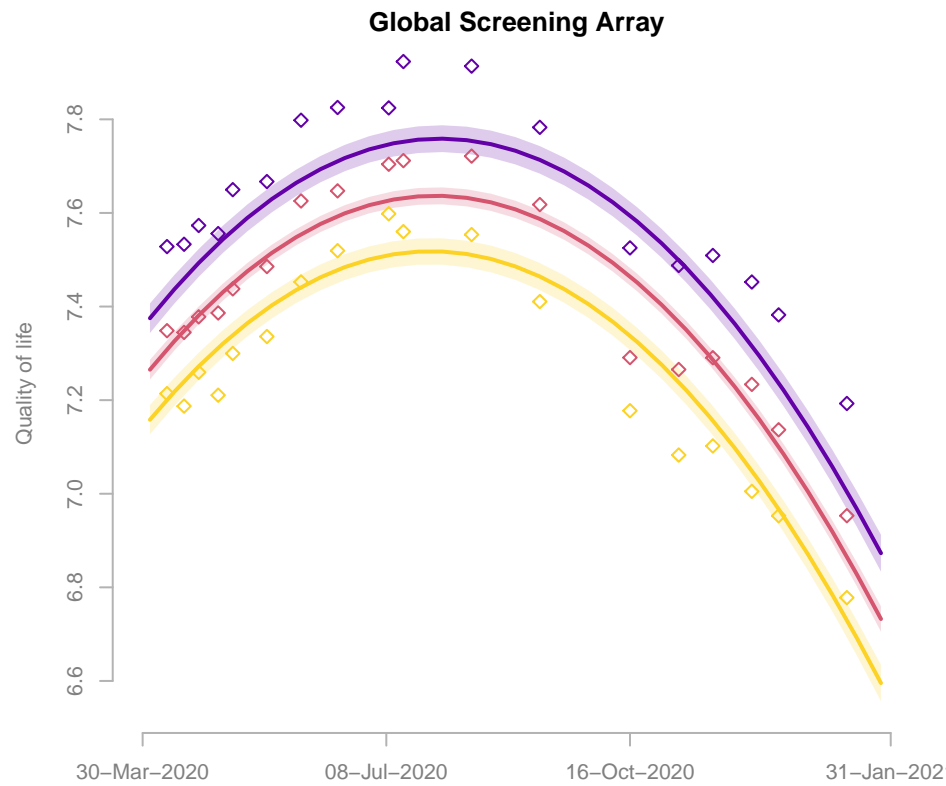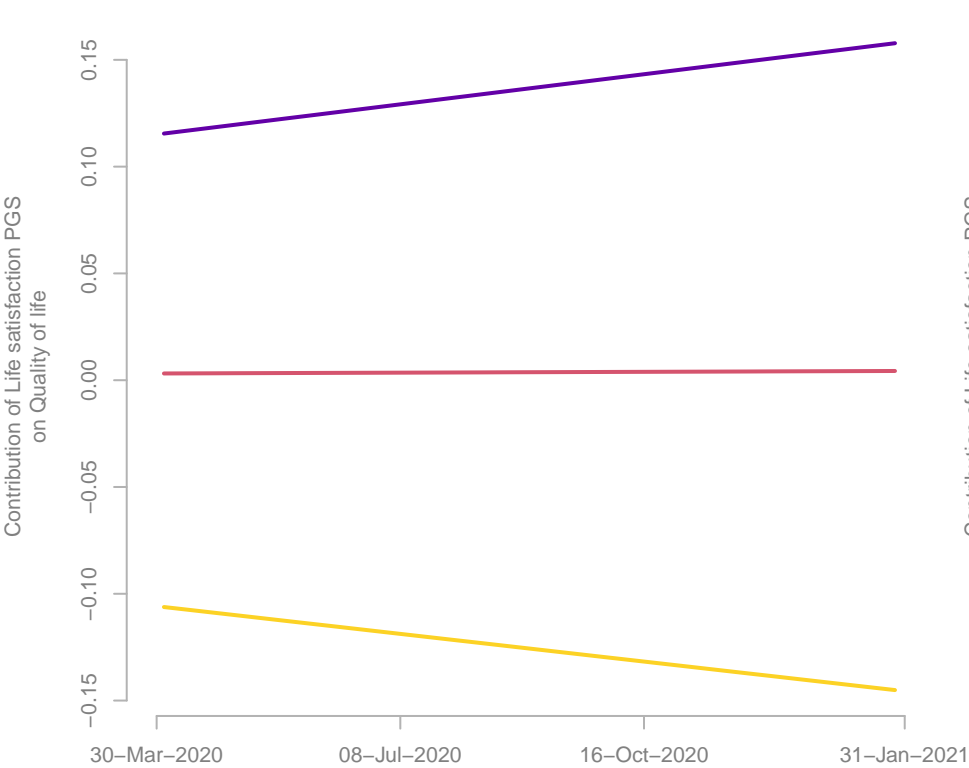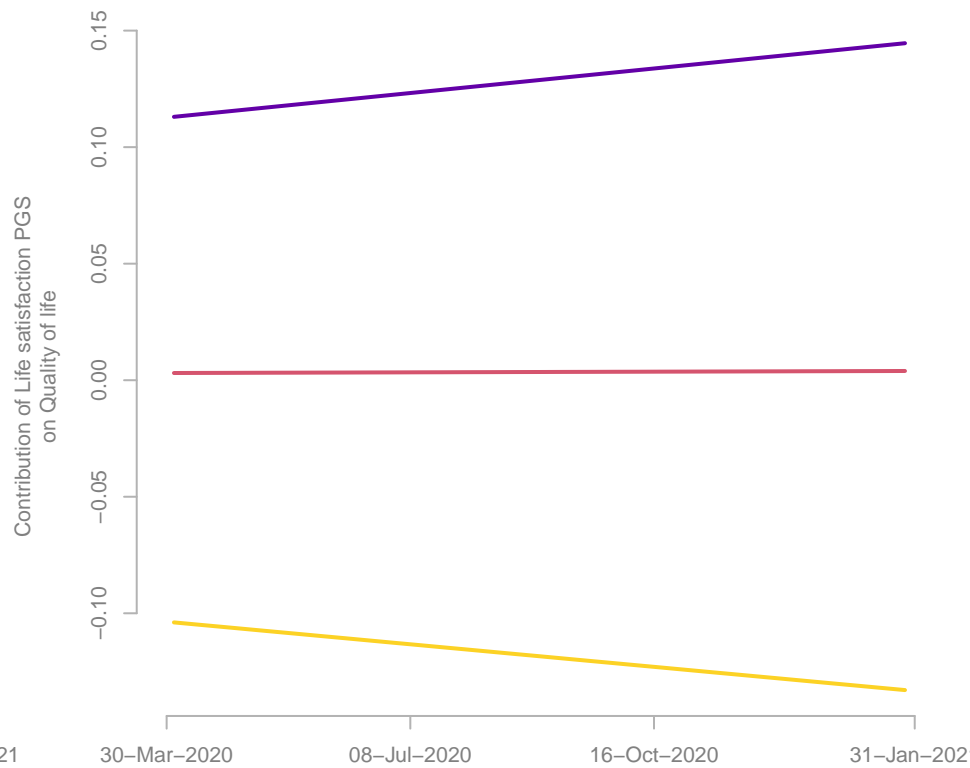

- ◆ Mean for participants with lowest 10% PGS for Life satisfaction
 — Fit for lowest 10% PGS for Life satisfaction
- ◆ Mean for participants with average PGS for Life satisfaction
 — Fit for median PGS for Life satisfaction
- ◆ Mean for participants with highest 10% PGS for Life satisfaction
 — Fit for highest 10% PGS for Life satisfaction

# Model fitted on 'Concerned about the COVID-19 pandemic' stratified by 'Schizophrenia'

Interaction P-value:  $1.53 \times 10^{-3}$  Z-score: -3.17

## HumanCytoSNP-12

## Global Screening Array

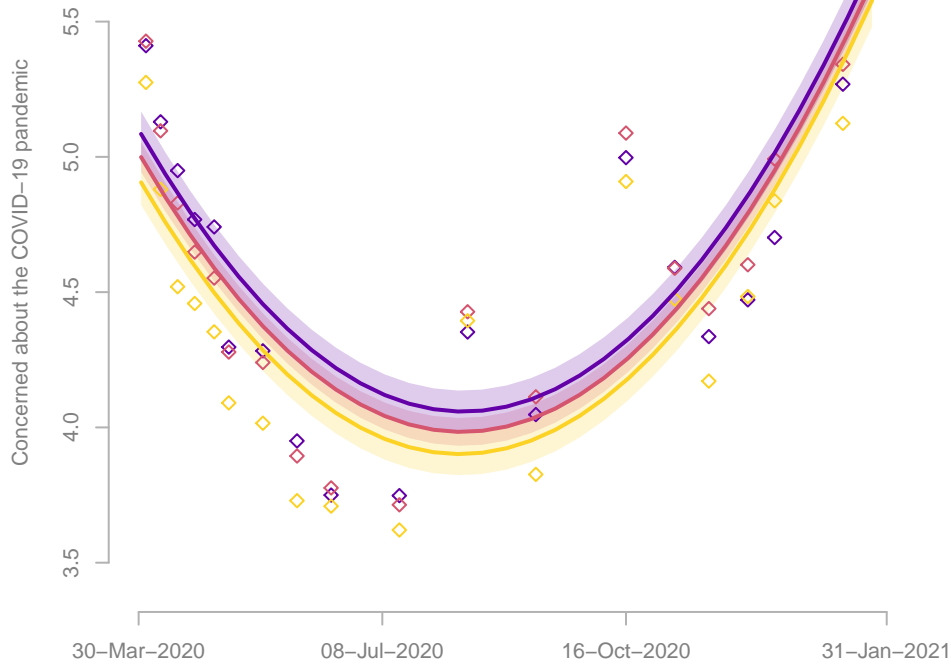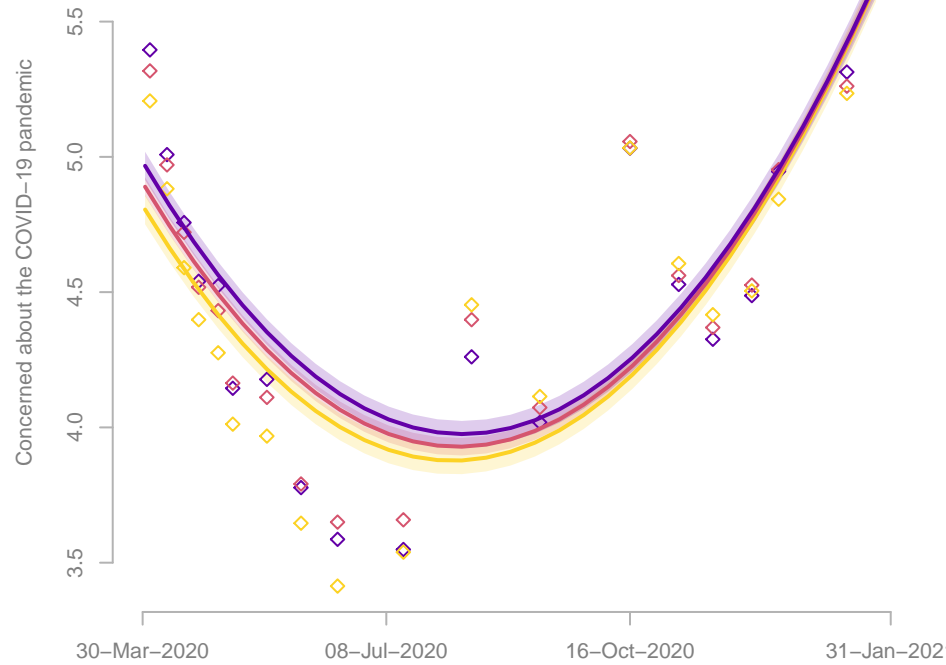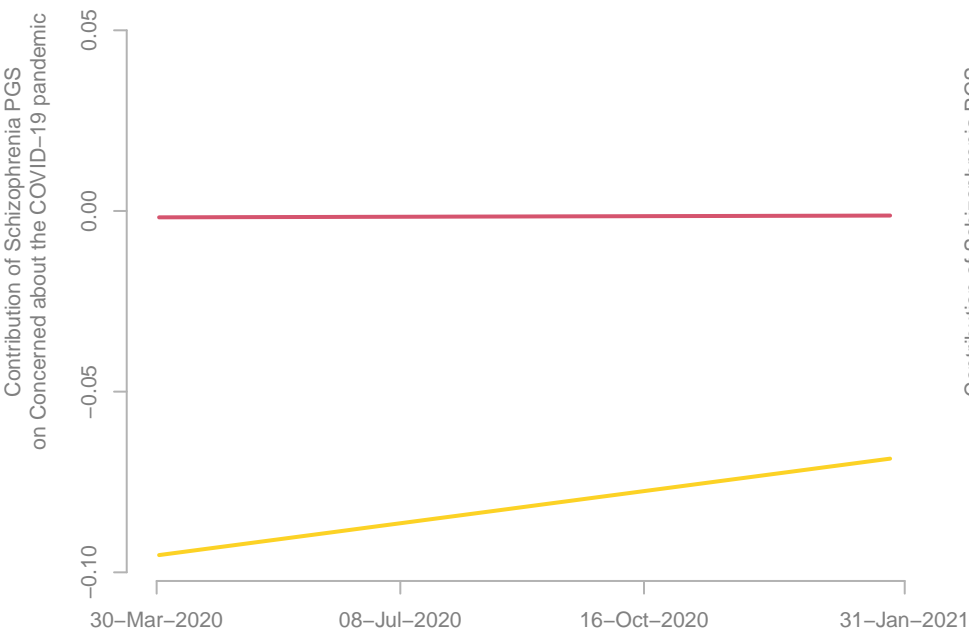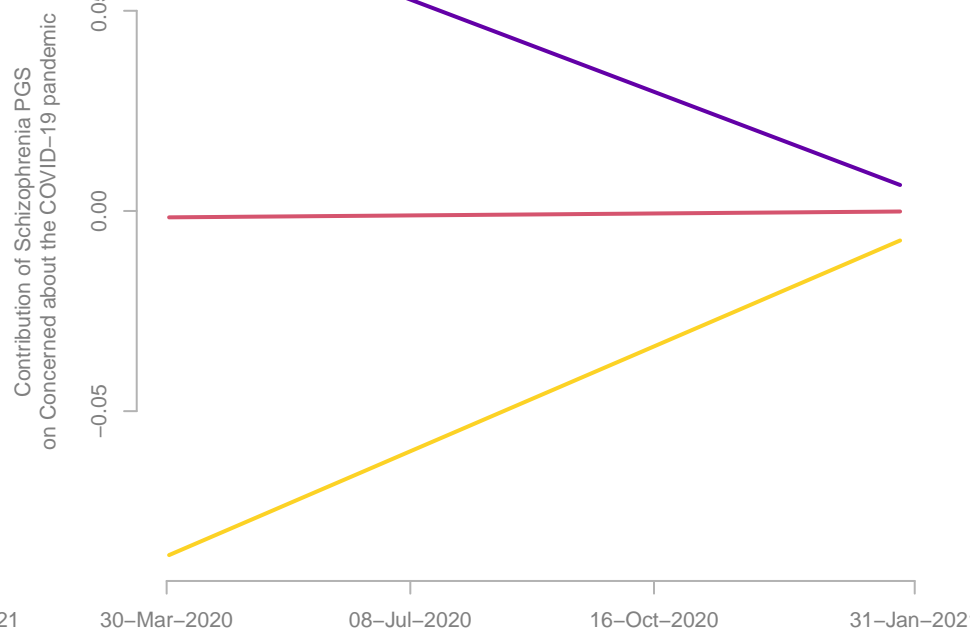

- ◆ Mean for participants with lowest 10% PGS for Schizophrenia
 — Fit for lowest 10% PGS for Schizophrenia
- ◆ Mean for participants with average PGS for Schizophrenia
 — Fit for median PGS for Schizophrenia
- ◆ Mean for participants with highest 10% PGS for Schizophrenia
 — Fit for highest 10% PGS for Schizophrenia

# Model fitted on 'Felt good' stratified by 'Life satisfaction'

Interaction P-value:  $8.14 \times 10^{-3}$  Z-score: 2.65

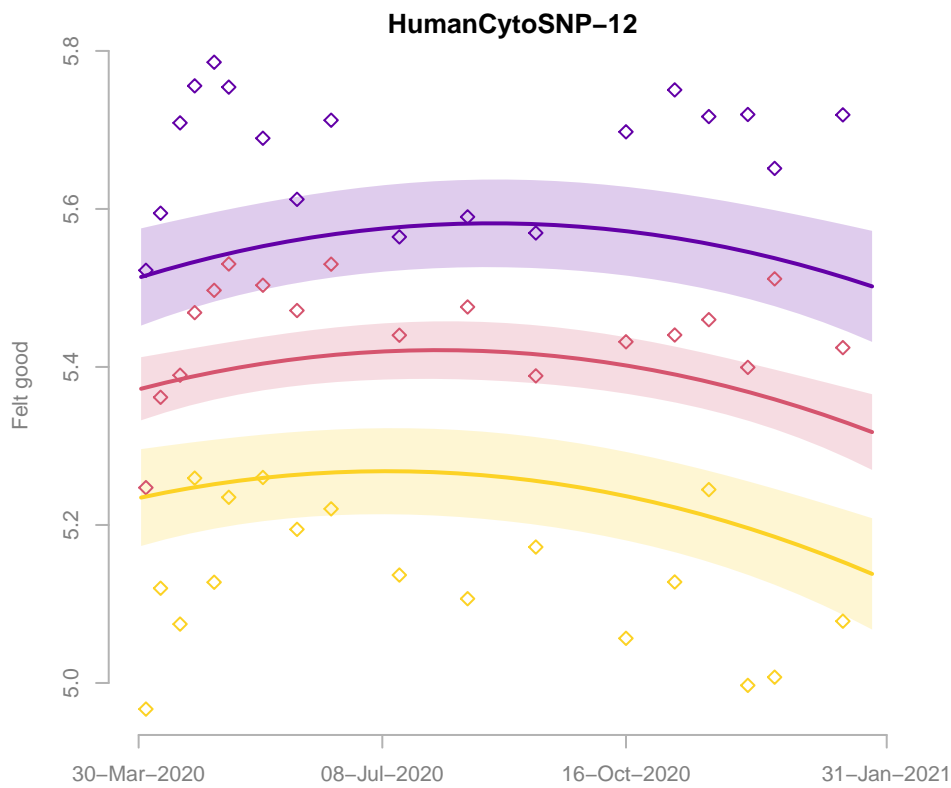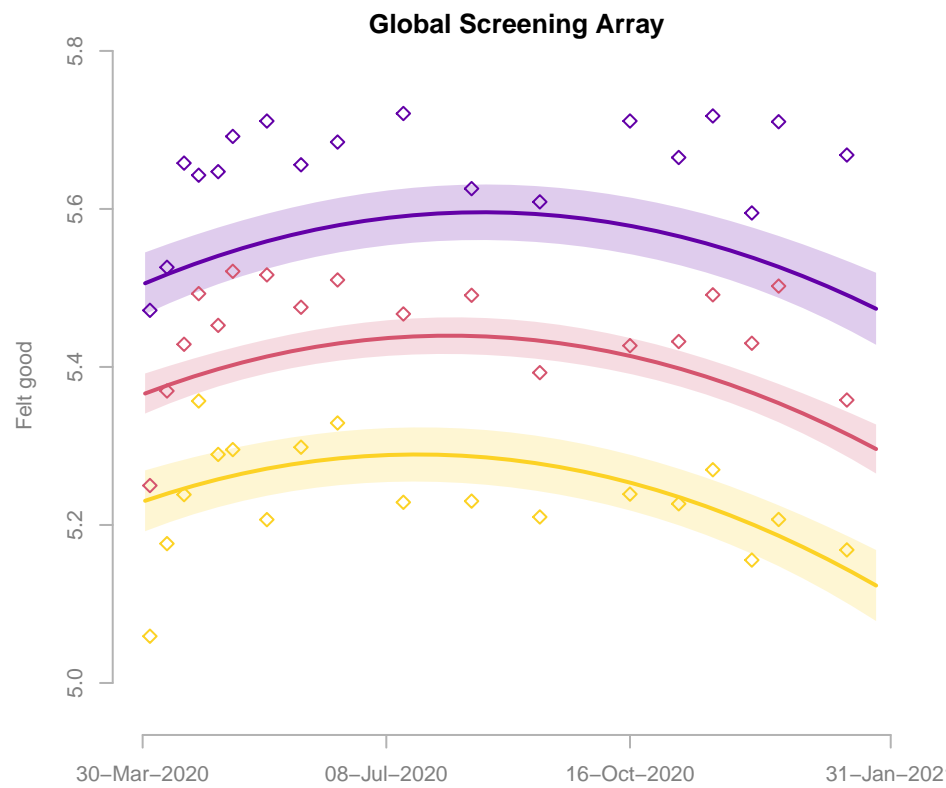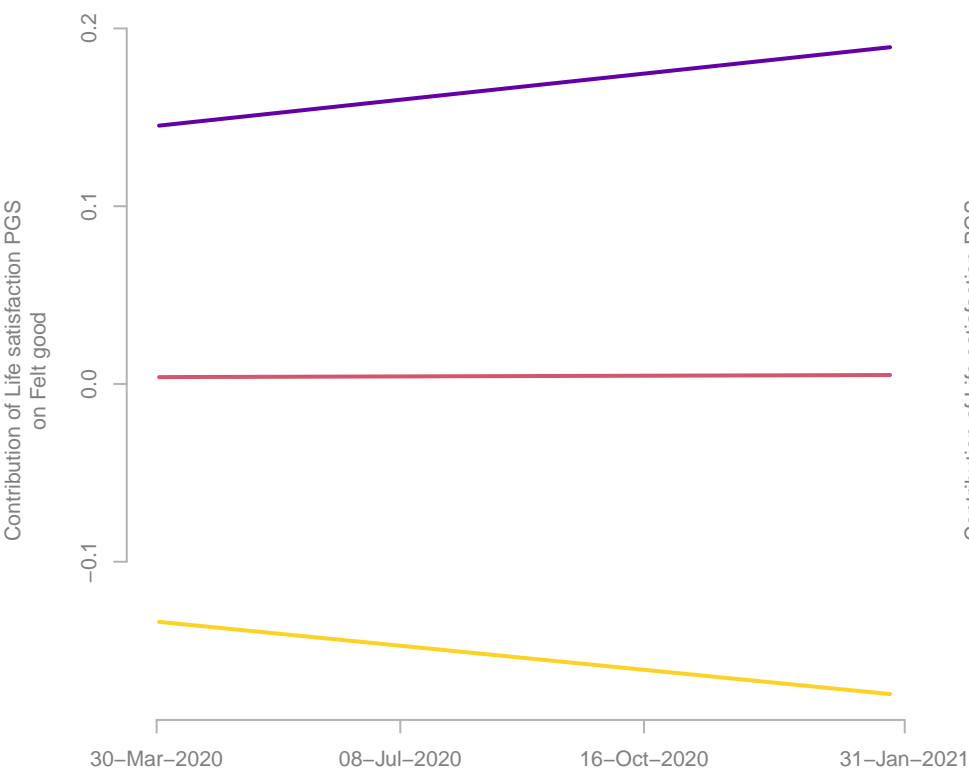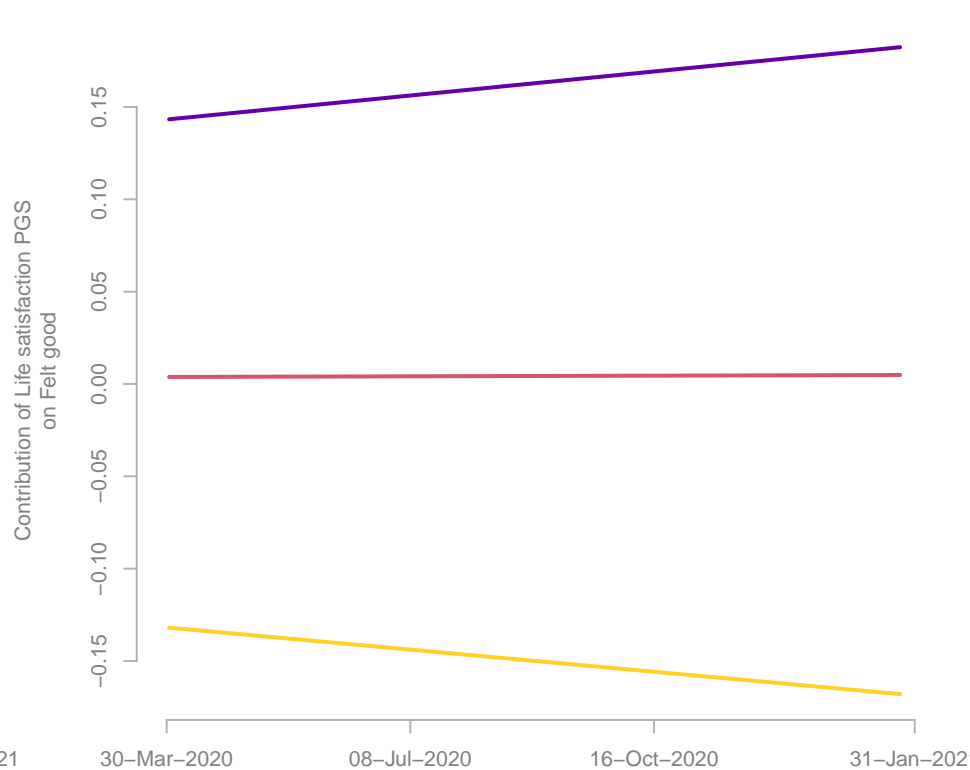

- ◆ Mean for participants with lowest 10% PGS for Life satisfaction
- ◆ Mean for participants with average PGS for Life satisfaction
- ◆ Mean for participants with highest 10% PGS for Life satisfaction
- Fit for lowest 10% PGS for Life satisfaction
- Fit for median PGS for Life satisfaction
- Fit for highest 10% PGS for Life satisfaction

# Model fitted on 'Felt good' stratified by 'Neuroticism'

Interaction P-value:  $5.89 \times 10^{-3}$  Z-score:  $-2.75$

## HumanCytoSNP-12

## Global Screening Array

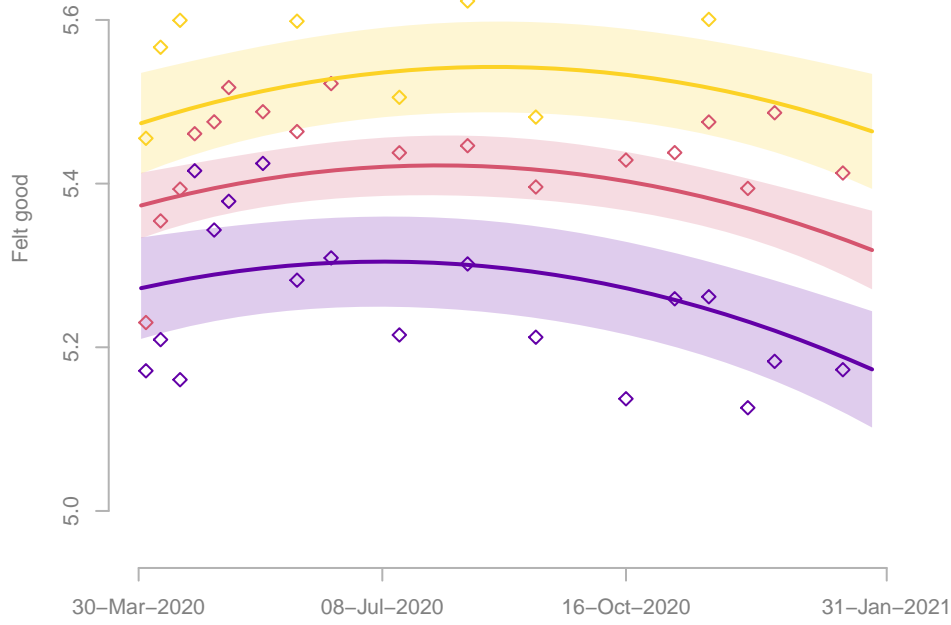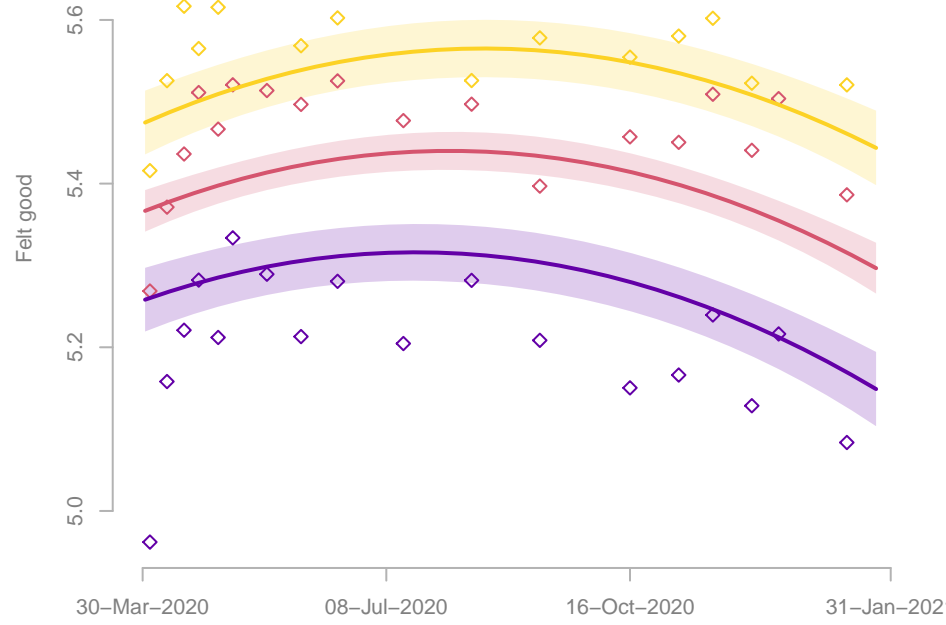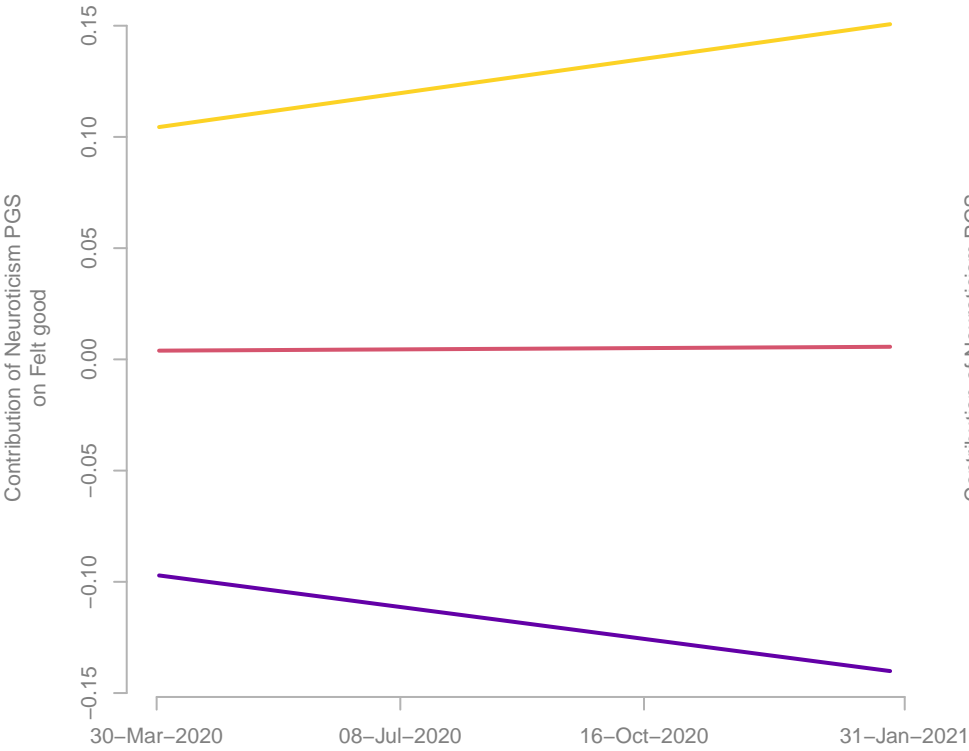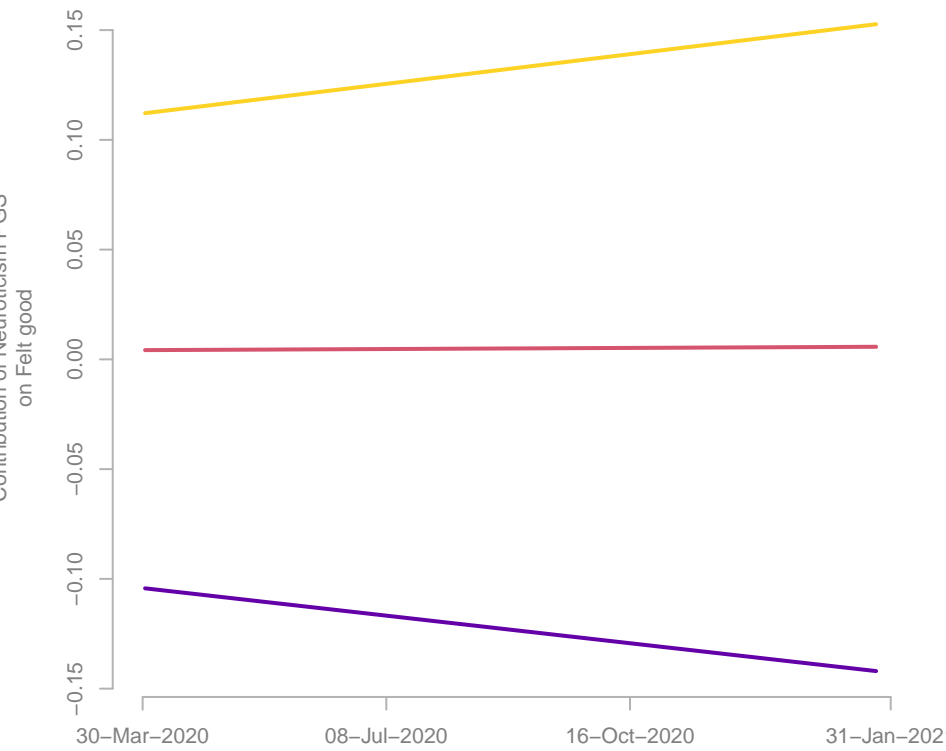

- ◆ Mean for participants with lowest 10% PGS for Neuroticism
 — Fit for lowest 10% PGS for Neuroticism
- ◆ Mean for participants with average PGS for Neuroticism
 — Fit for median PGS for Neuroticism
- ◆ Mean for participants with highest 10% PGS for Neuroticism
 — Fit for highest 10% PGS for Neuroticism

# Model fitted on 'Felt tired' stratified by 'Depression'

Interaction P-value:  $2.25 \times 10^{-3}$  Z-score: 3.06

## HumanCytoSNP-12

## Global Screening Array

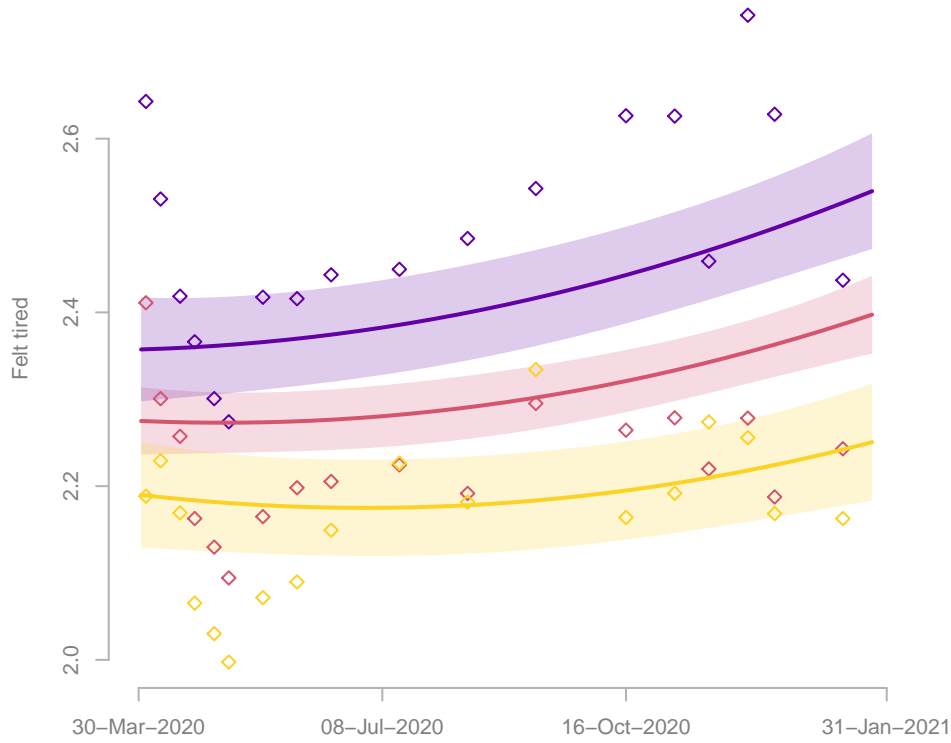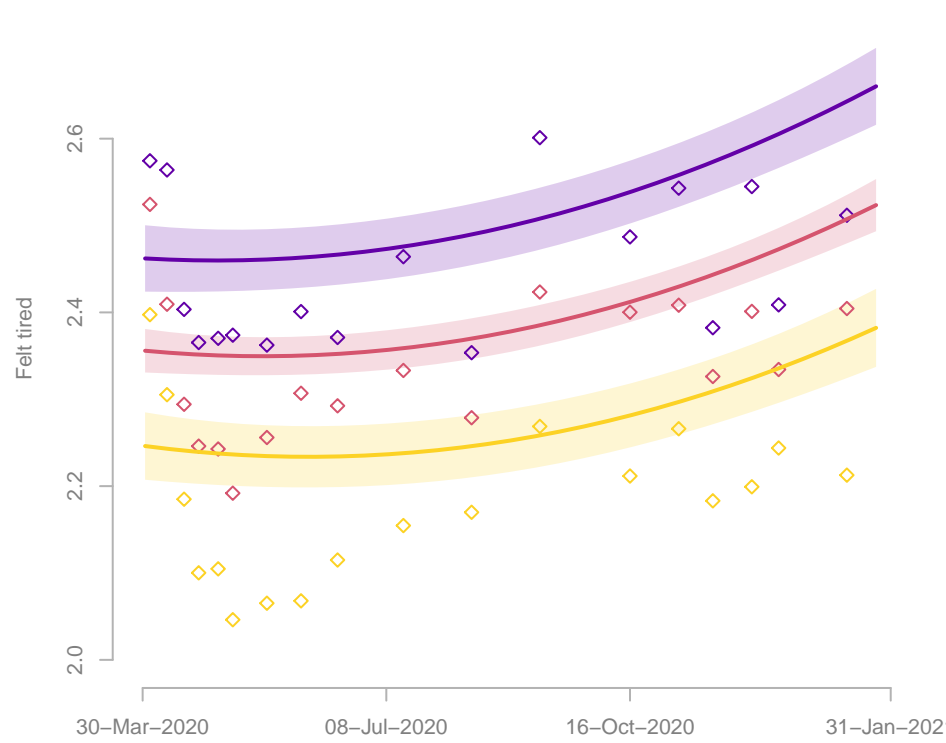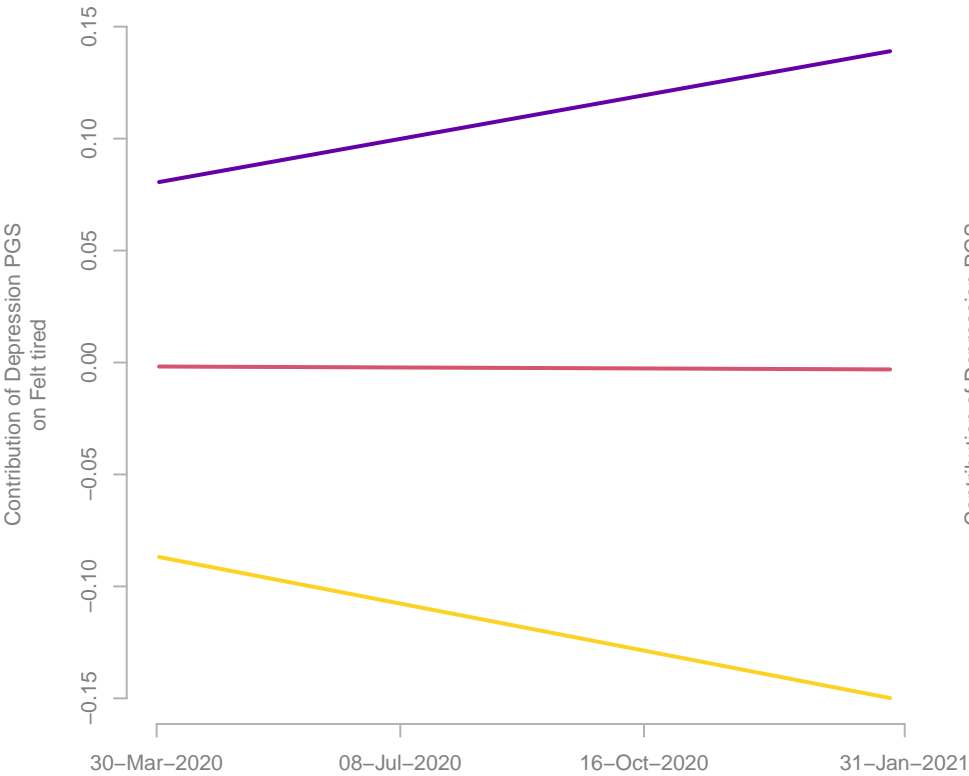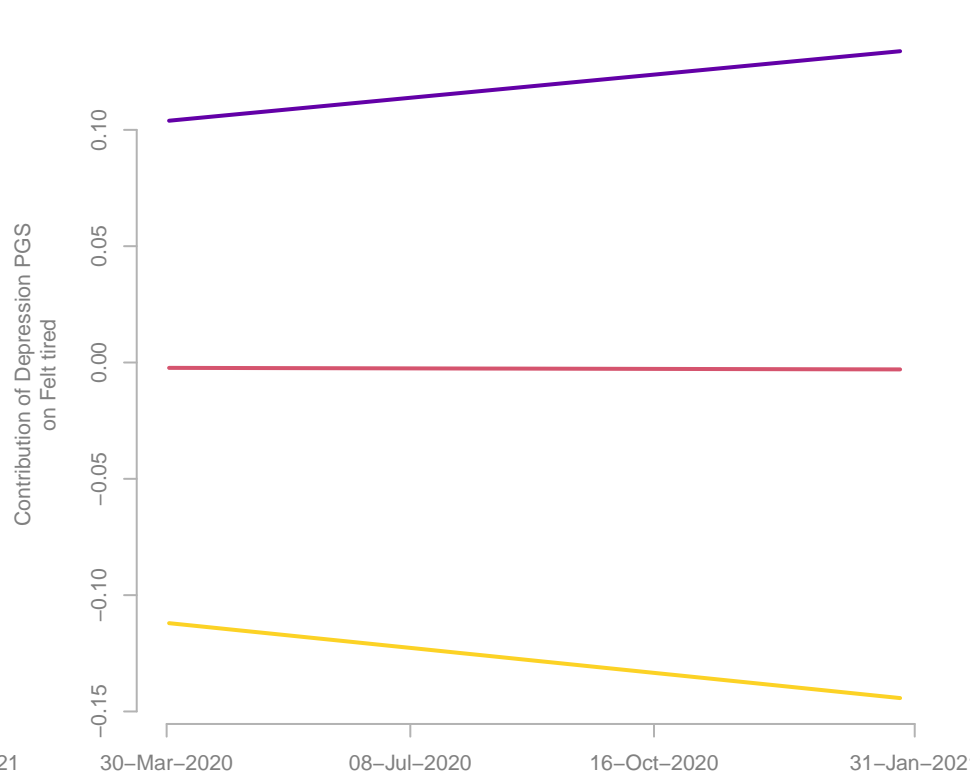

- ◆ Mean for participants with lowest 10% PGS for Depression
 — Fit for lowest 10% PGS for Depression
- ◆ Mean for participants with average PGS for Depression
 — Fit for median PGS for Depression
- ◆ Mean for participants with highest 10% PGS for Depression
 — Fit for highest 10% PGS for Depression

# Model fitted on 'Felt tired' stratified by 'Life satisfaction'

Interaction P-value:  $1.27 \times 10^{-4}$  Z-score: -3.83

## HumanCytoSNP-12

## Global Screening Array

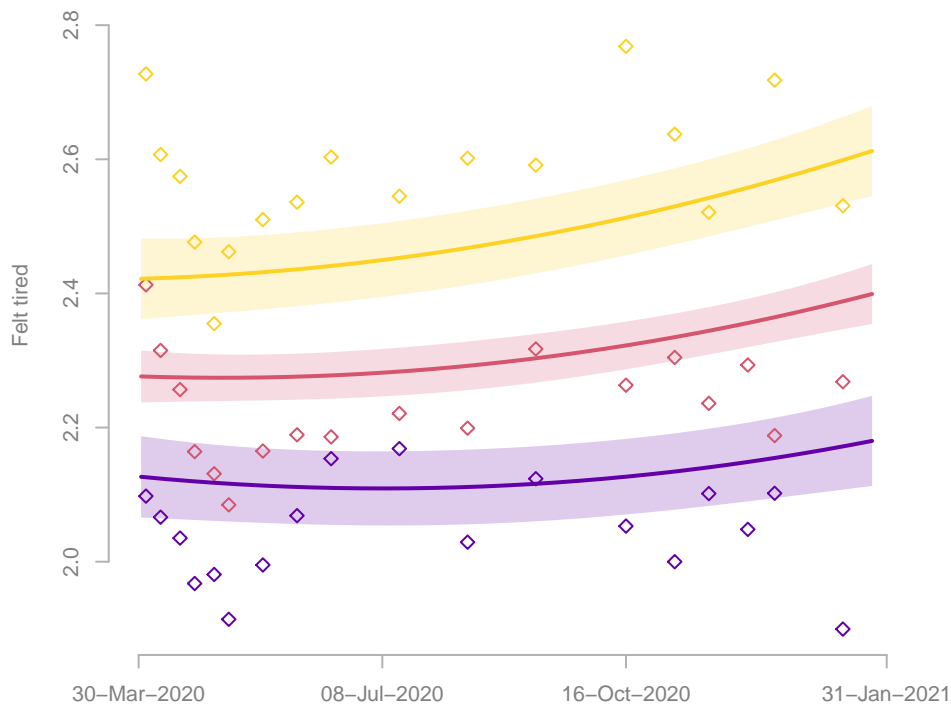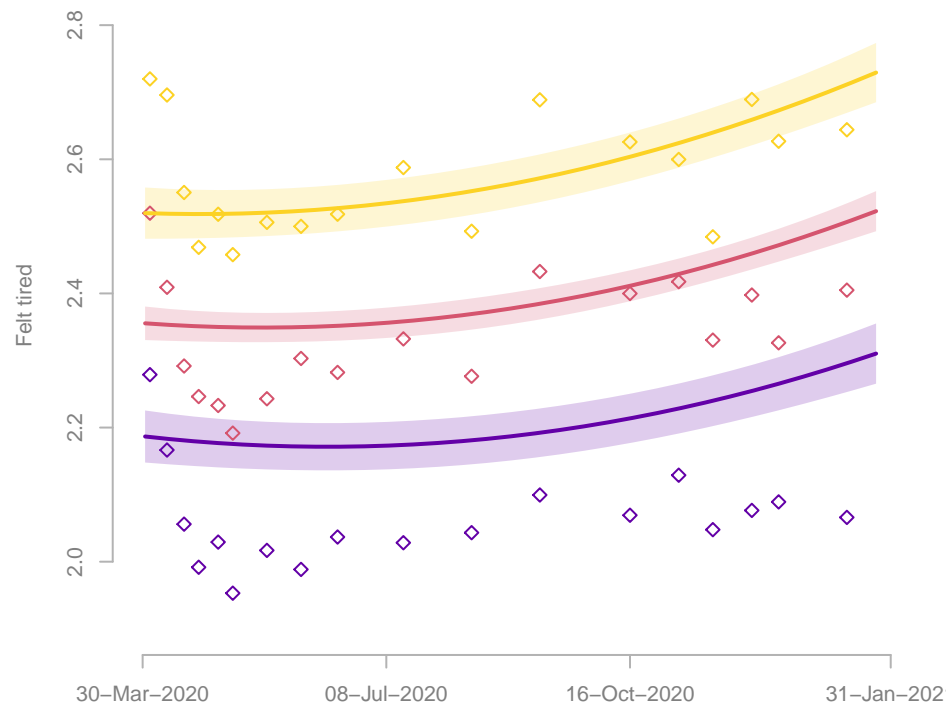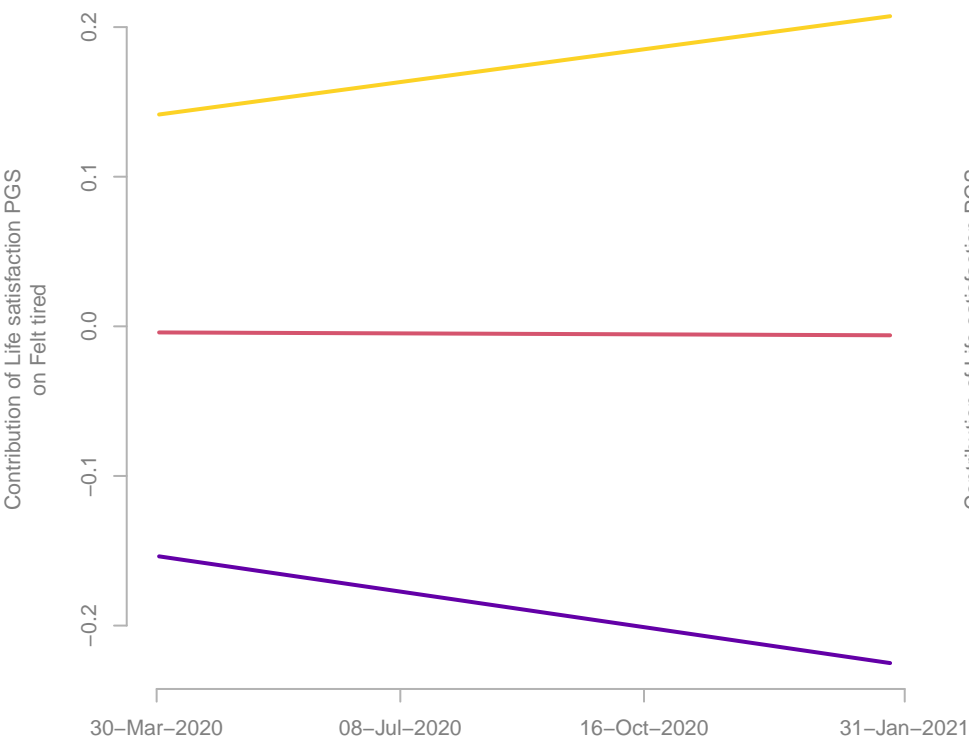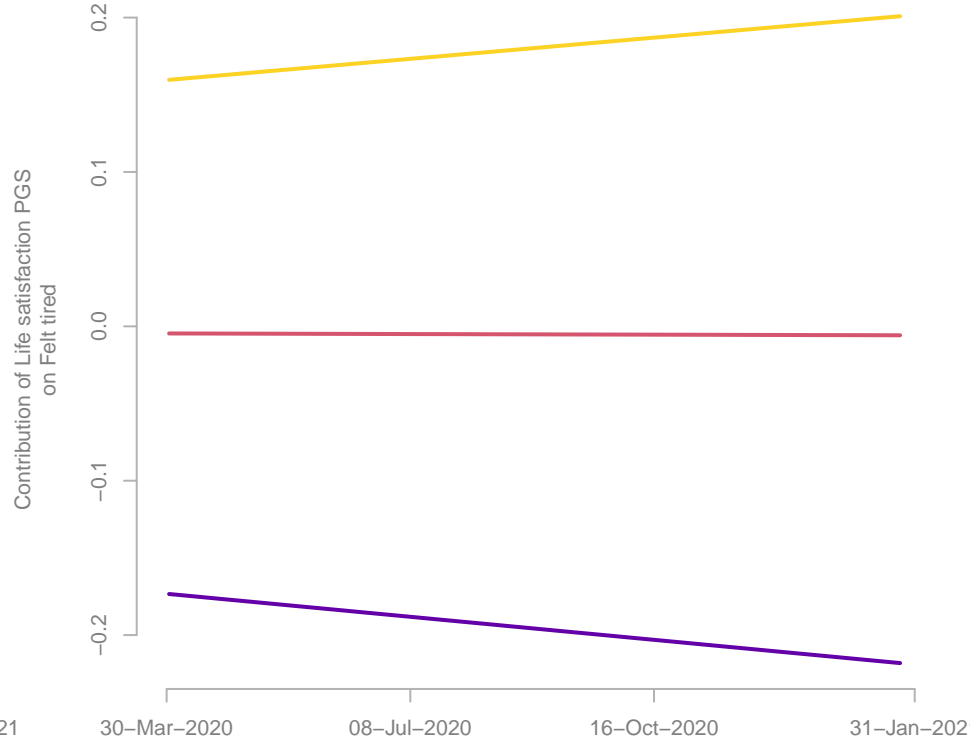

- ◆ Mean for participants with lowest 10% PGS for Life satisfaction
 — Fit for lowest 10% PGS for Life satisfaction
- ◆ Mean for participants with average PGS for Life satisfaction
 — Fit for median PGS for Life satisfaction
- ◆ Mean for participants with highest 10% PGS for Life satisfaction
 — Fit for highest 10% PGS for Life satisfaction

# Model fitted on 'Felt tired' stratified by 'Neuroticism'

Interaction P-value:  $7.51 \times 10^{-3}$  Z-score: 2.67

## HumanCytoSNP-12

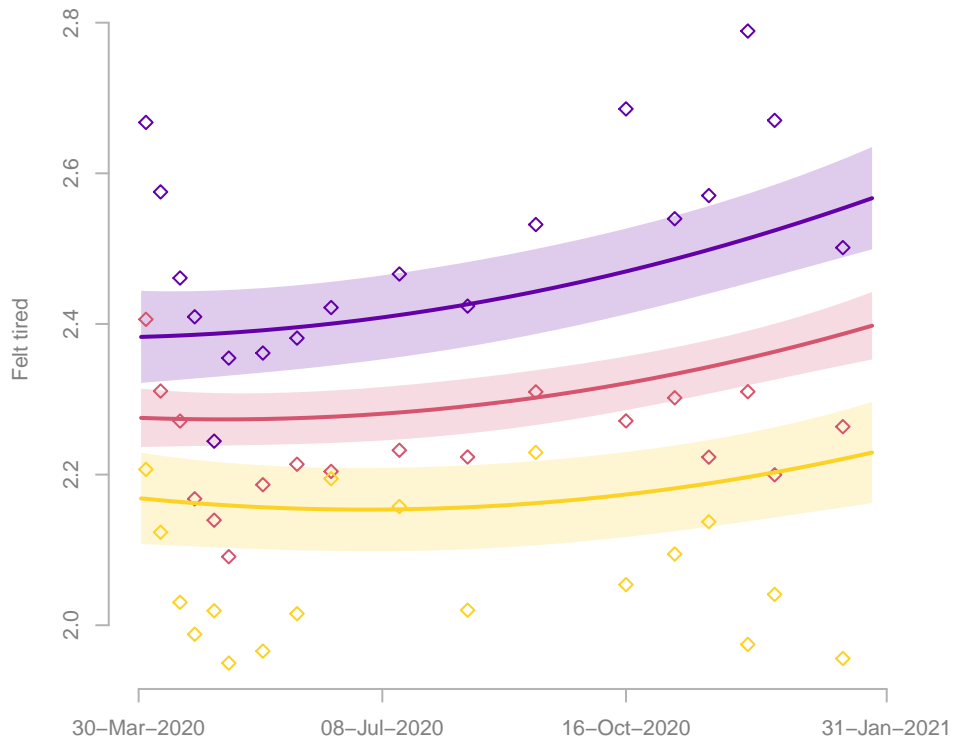

## Global Screening Array

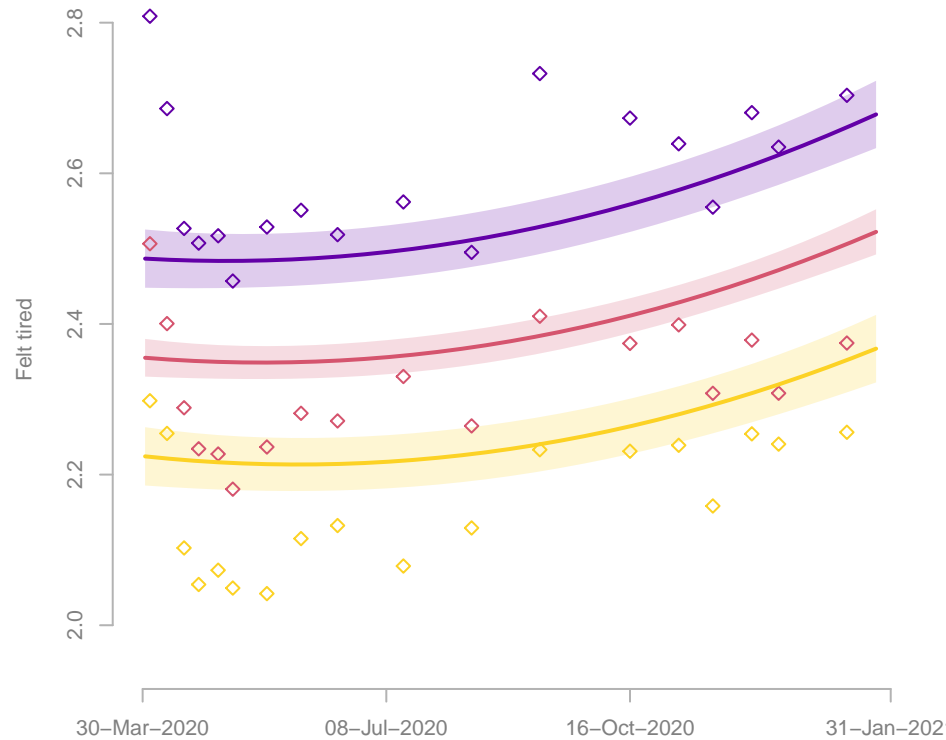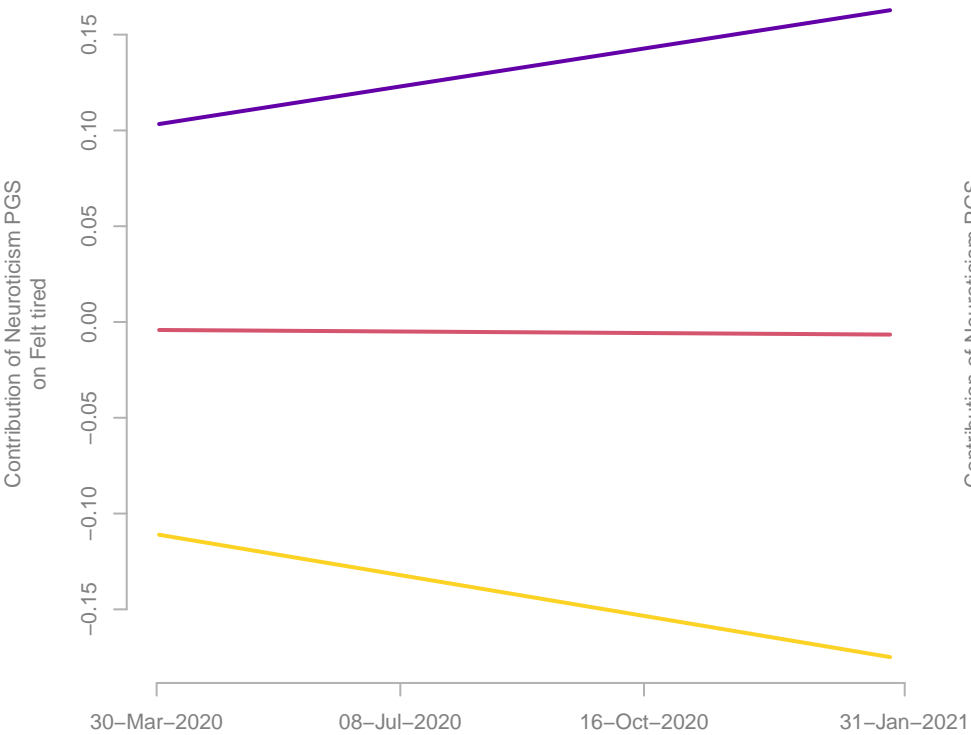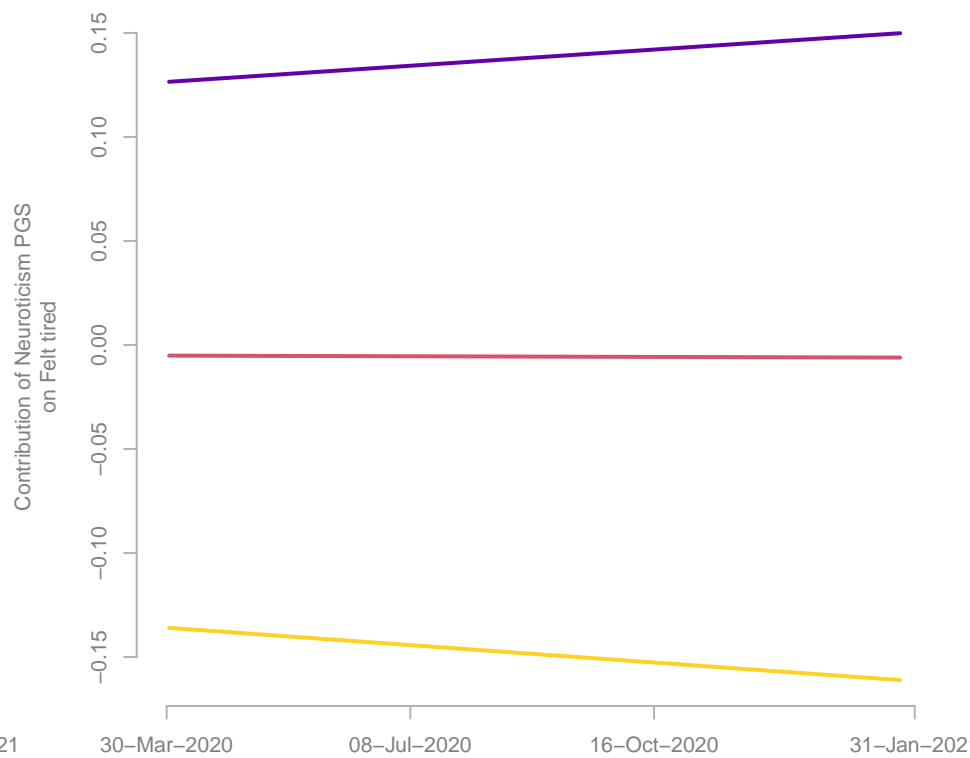

- ◇ Mean for participants with lowest 10% PGS for Neuroticism
 — Fit for lowest 10% PGS for Neuroticism
- ◇ Mean for participants with average PGS for Neuroticism
 — Fit for median PGS for Neuroticism
- ◇ Mean for participants with highest 10% PGS for Neuroticism
 — Fit for highest 10% PGS for Neuroticism

# Model fitted on 'Was easily tired' stratified by 'Life satisfaction'

Interaction P-value:  $6.78 \times 10^{-3}$  Z-score: -2.71

## HumanCytoSNP-12

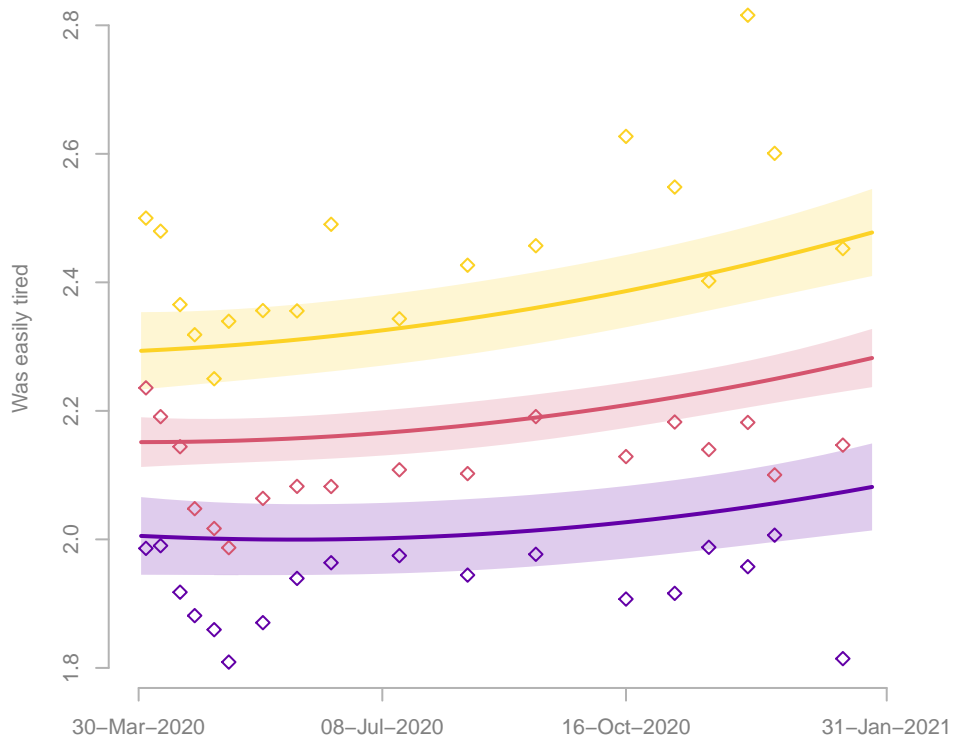

## Global Screening Array

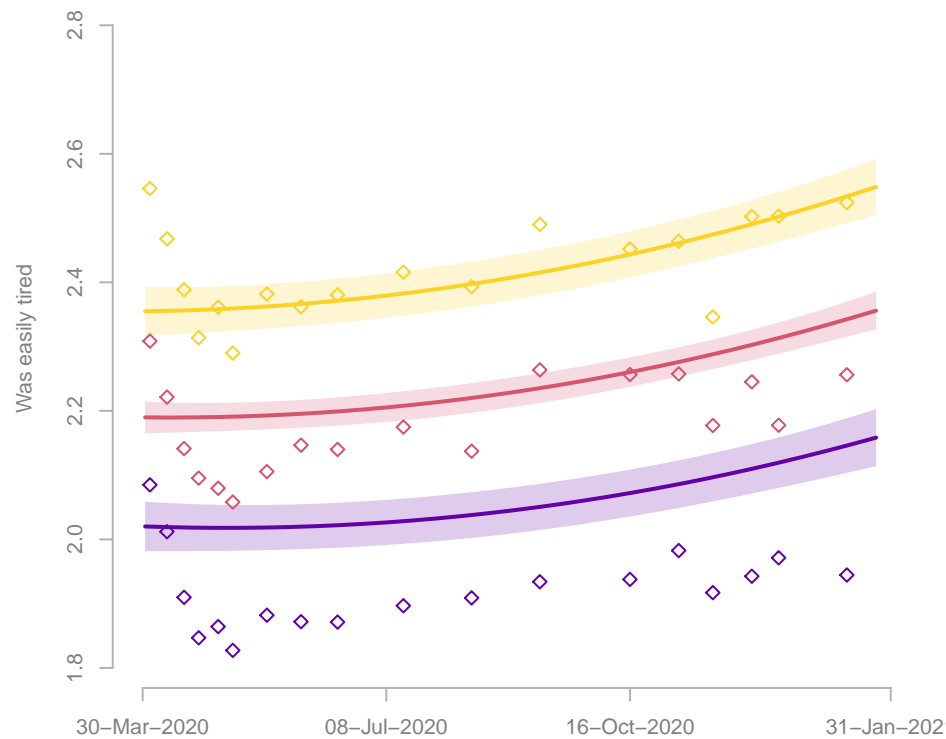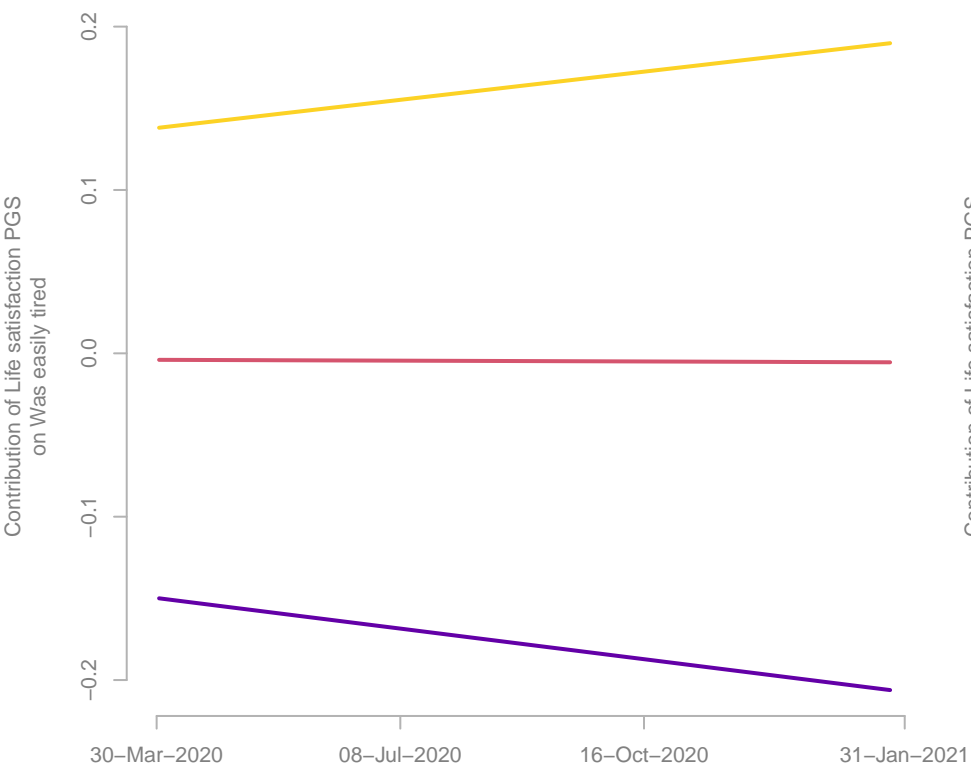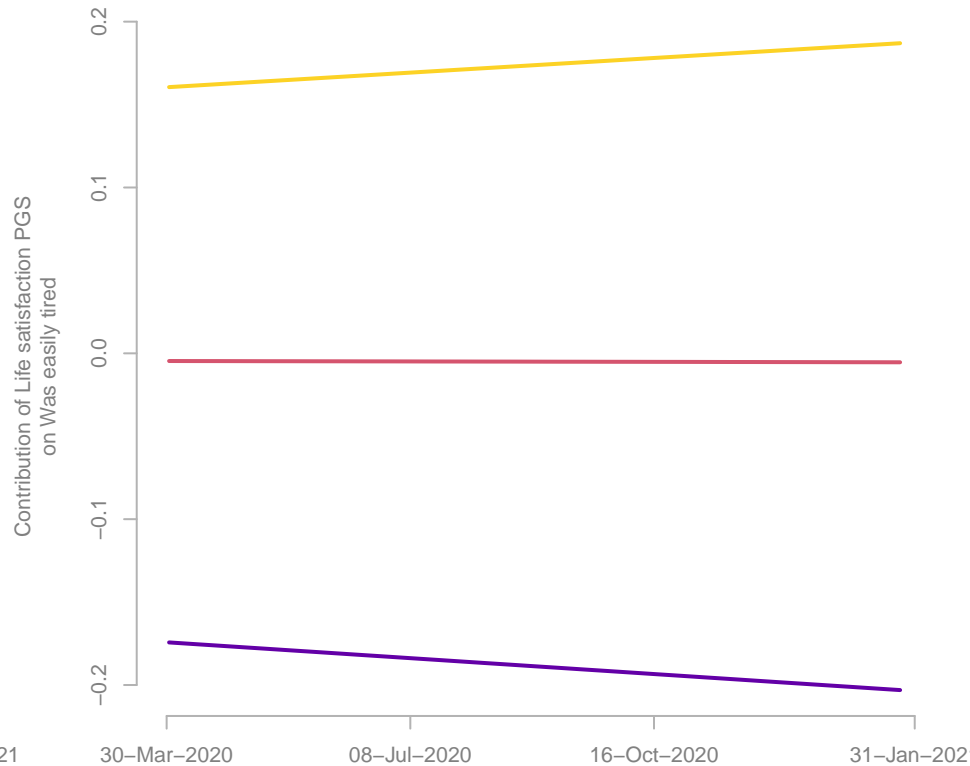

- ◆ Mean for participants with lowest 10% PGS for Life satisfaction
- ◆ Mean for participants with average PGS for Life satisfaction
- ◆ Mean for participants with highest 10% PGS for Life satisfaction
- Fit for lowest 10% PGS for Life satisfaction
- Fit for median PGS for Life satisfaction
- Fit for highest 10% PGS for Life satisfaction



# Model fitted on 'Was easily tired' stratified by 'Neuroticism'

Interaction P-value:  $5.58 \times 10^{-3}$  Z-score: 2.77

## HumanCytoSNP-12

## Global Screening Array

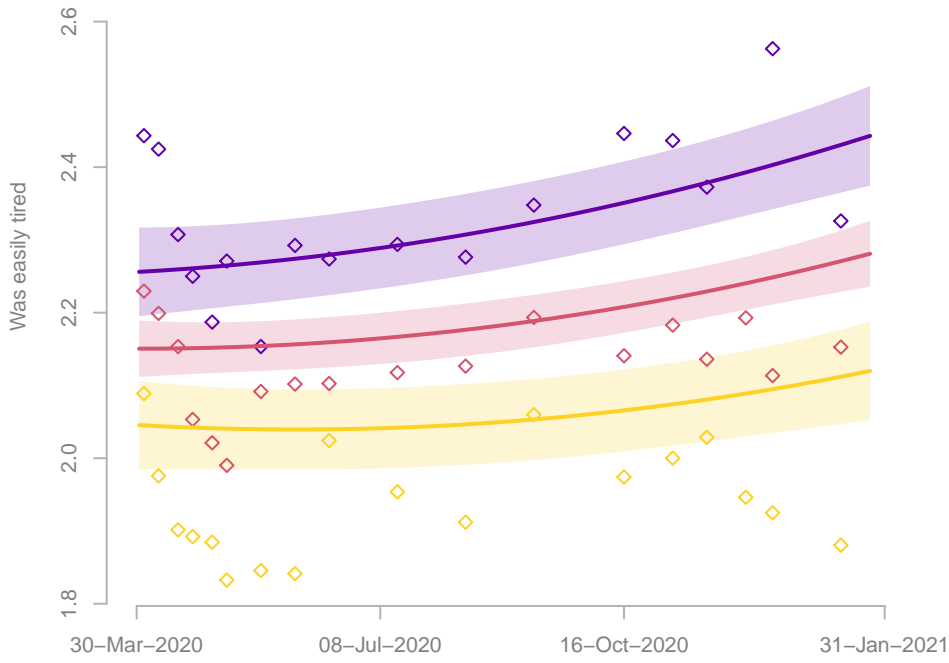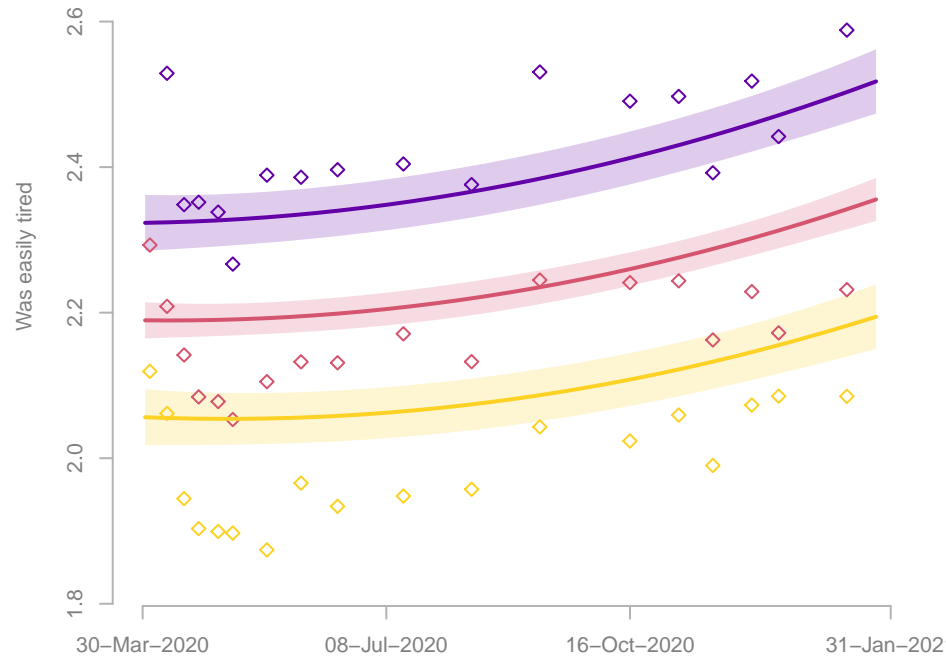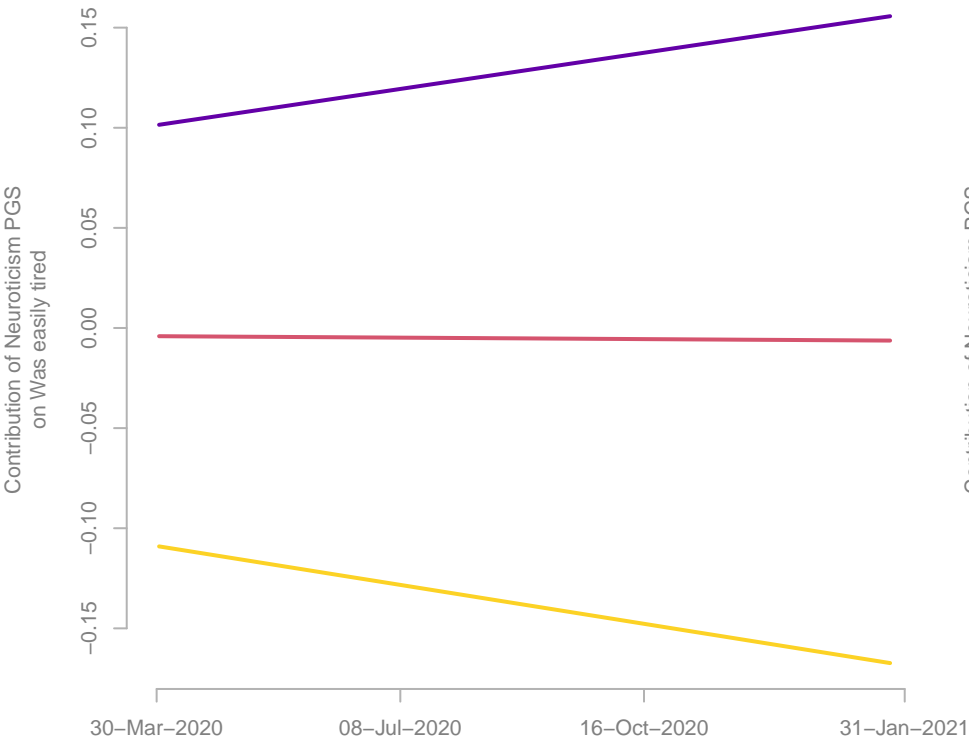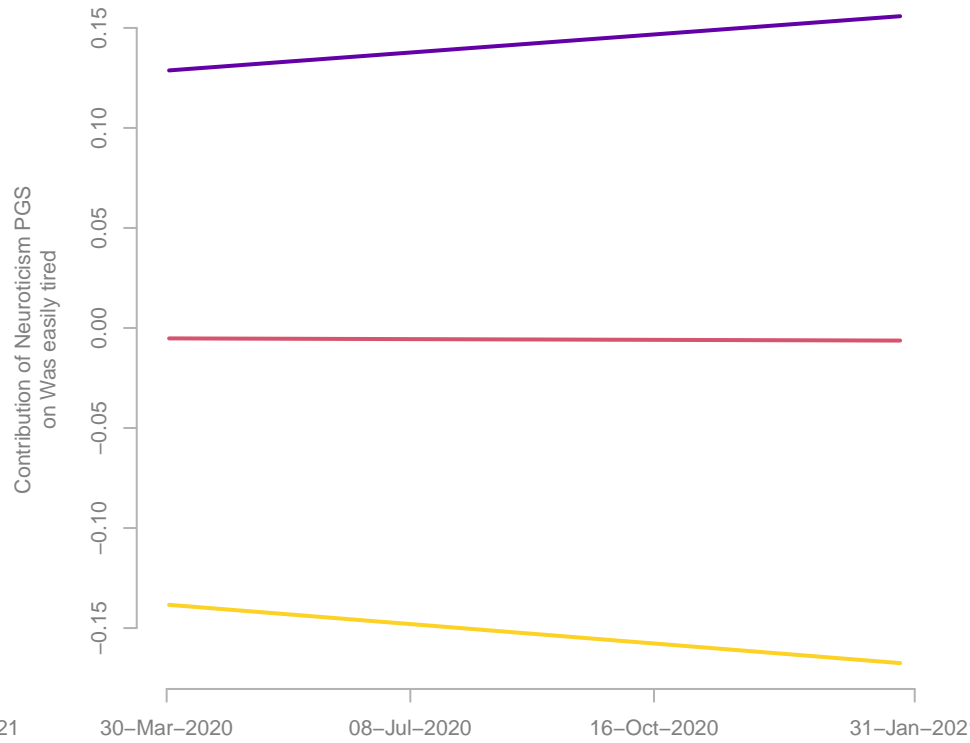

- ◆ Mean for participants with lowest 10% PGS for Neuroticism
 — Fit for lowest 10% PGS for Neuroticism
- ◆ Mean for participants with average PGS for Neuroticism
 — Fit for median PGS for Neuroticism
- ◆ Mean for participants with highest 10% PGS for Neuroticism
 — Fit for highest 10% PGS for Neuroticism

# Model fitted on 'Felt physically exhausted' stratified by 'Life satisfaction'

Interaction P-value: 0.01 Z-score: -2.56

## HumanCytoSNP-12

## Global Screening Array

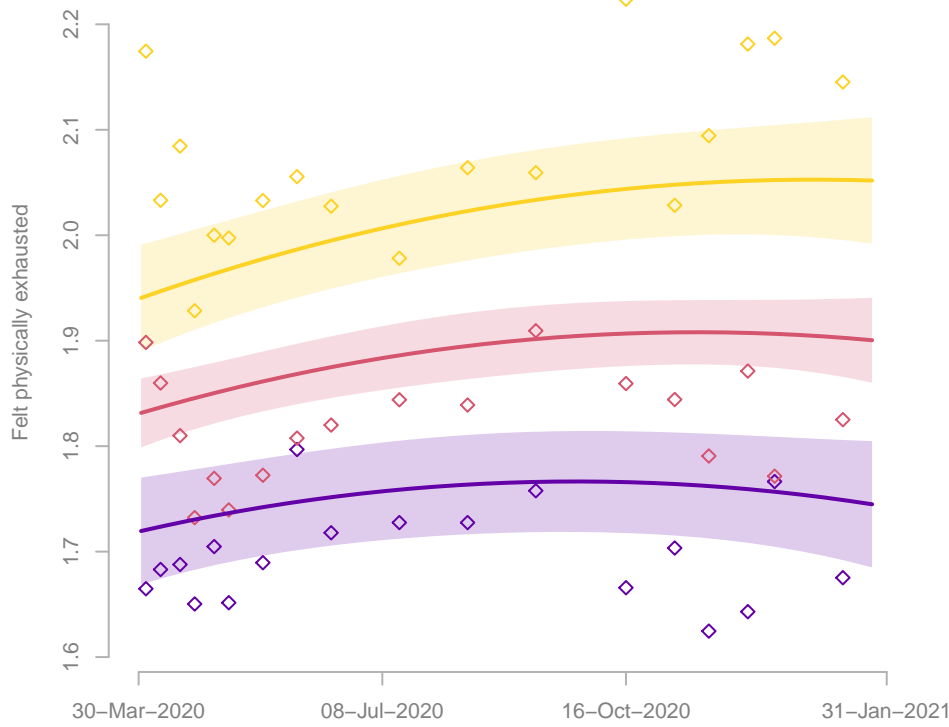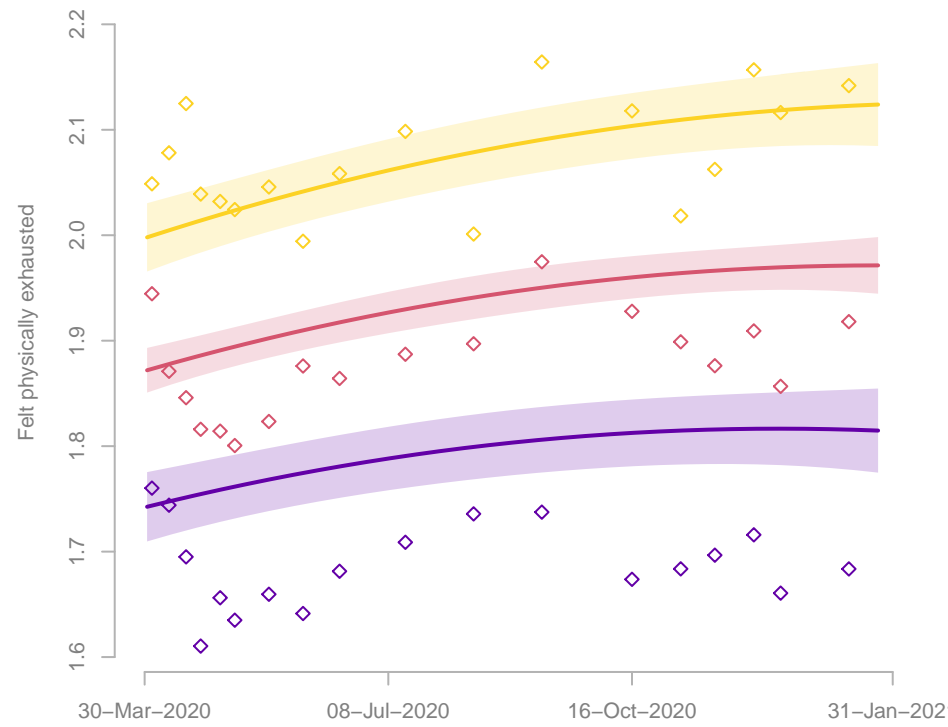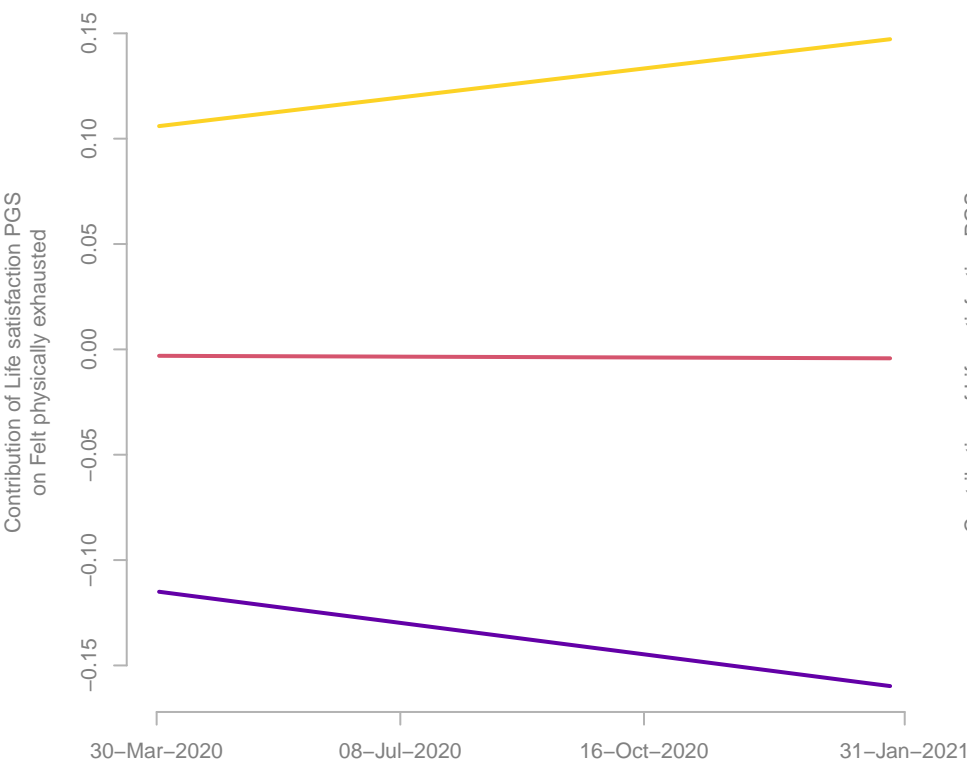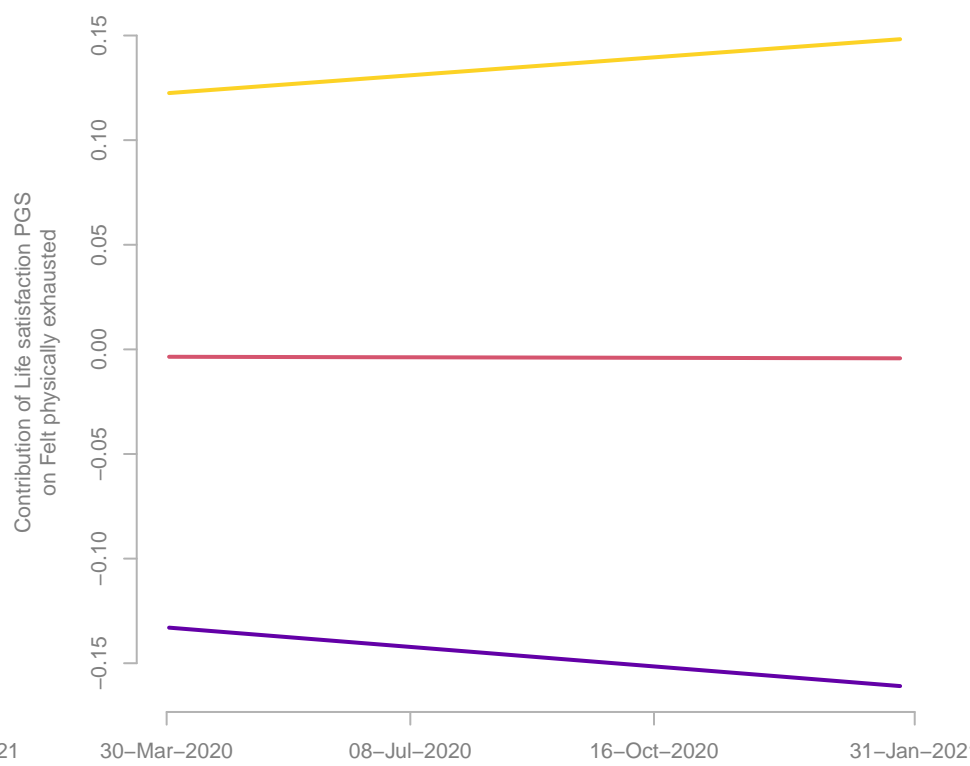

- ◆ Mean for participants with lowest 10% PGS for Life satisfaction
 — Fit for lowest 10% PGS for Life satisfaction
- ◆ Mean for participants with average PGS for Life satisfaction
 — Fit for median PGS for Life satisfaction
- ◆ Mean for participants with highest 10% PGS for Life satisfaction
 — Fit for highest 10% PGS for Life satisfaction

# Model fitted on 'Ever positive SARS-CoV-2 PCR test' stratified by 'COVID-19 susceptibility'

Interaction P-value:  $5.15 \times 10^{-30}$  Z-score: -11.38

## HumanCytoSNP-12

## Global Screening Array

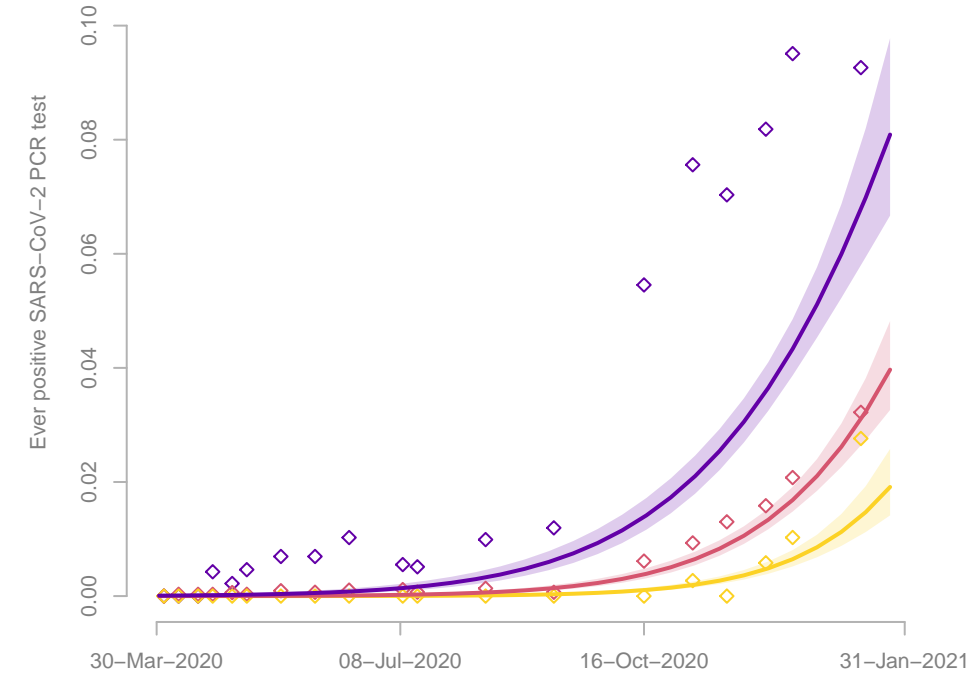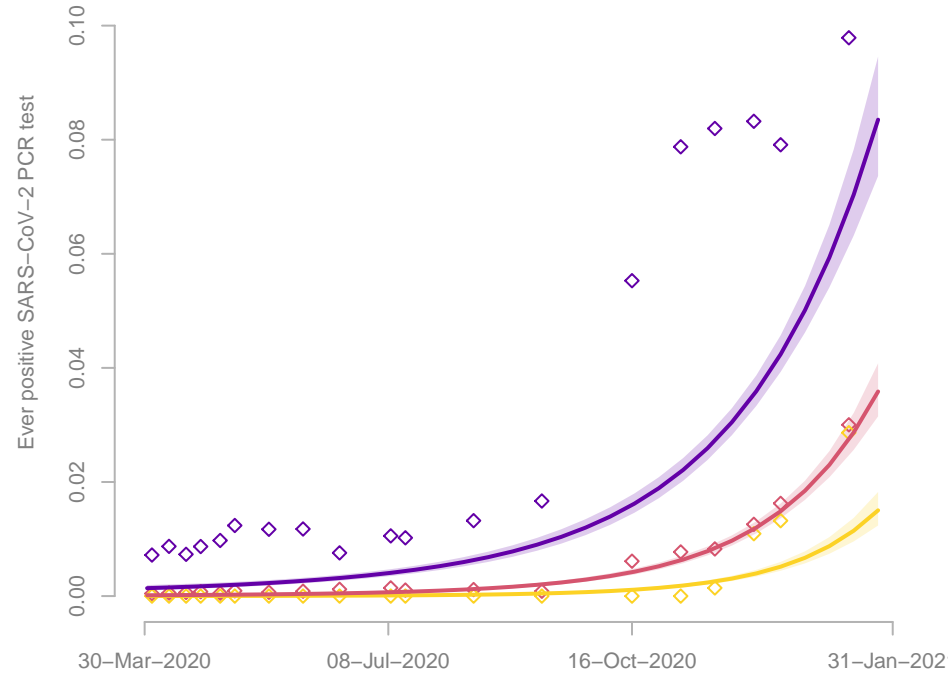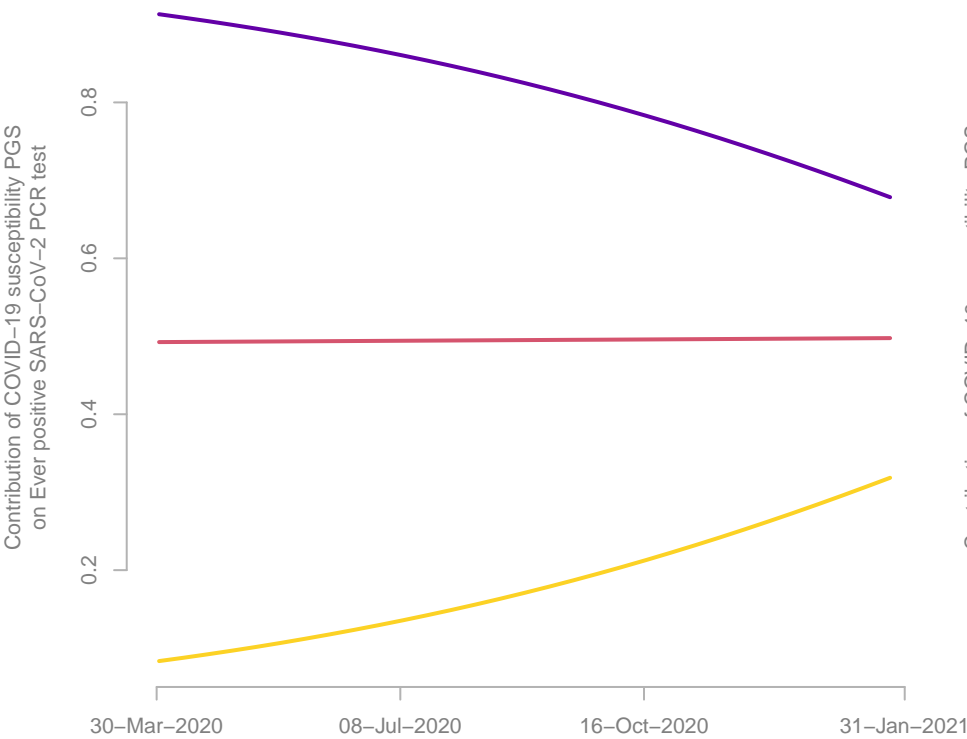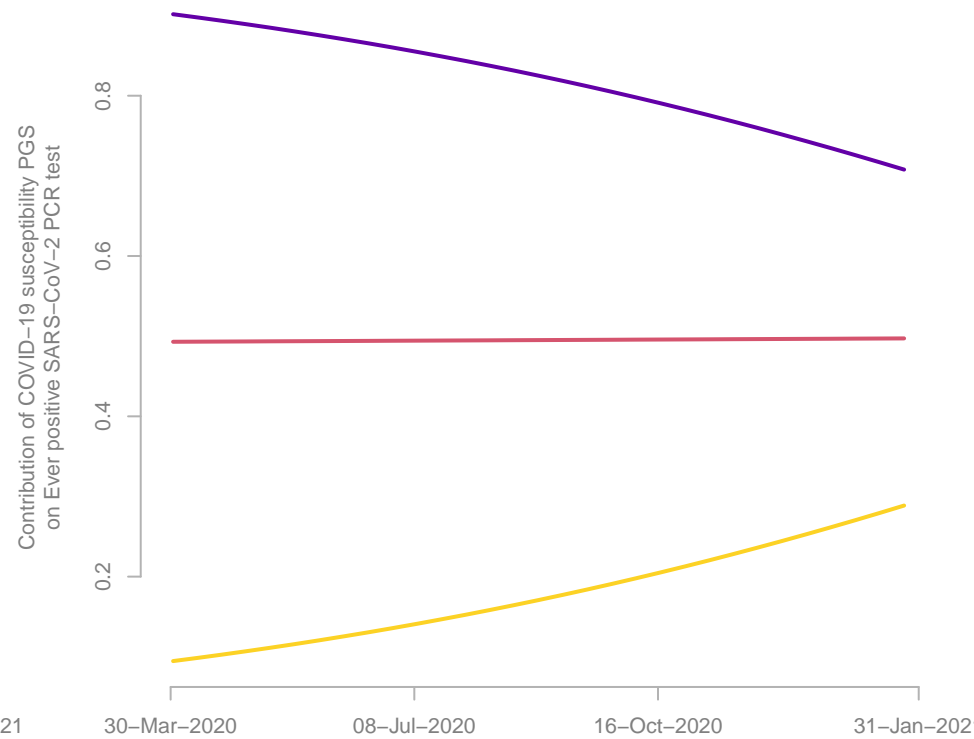

- ◆ Mean for participants with lowest 10% PGS for COVID-19 susceptibility
- ◆ Mean for participants with average PGS for COVID-19 susceptibility
- ◆ Mean for participants with highest 10% PGS for COVID-19 susceptibility
- Fit for lowest 10% PGS for COVID-19 susceptibility
- Fit for median PGS for COVID-19 susceptibility
- Fit for highest 10% PGS for COVID-19 susceptibility
