# Supplementary material for: Increased genetic contribution to wellbeing during the COVID-19 pandemic
Source: PubMed Central journal article supplement (PMC9119461; doi:10.1371/journal.pgen.1010135), 2022-05-19
Supplement: pgen.1010135.s022.pdf [file pgen.1010135.s022.pdf]

# A: Baseline samples versus not included samples (GSA)

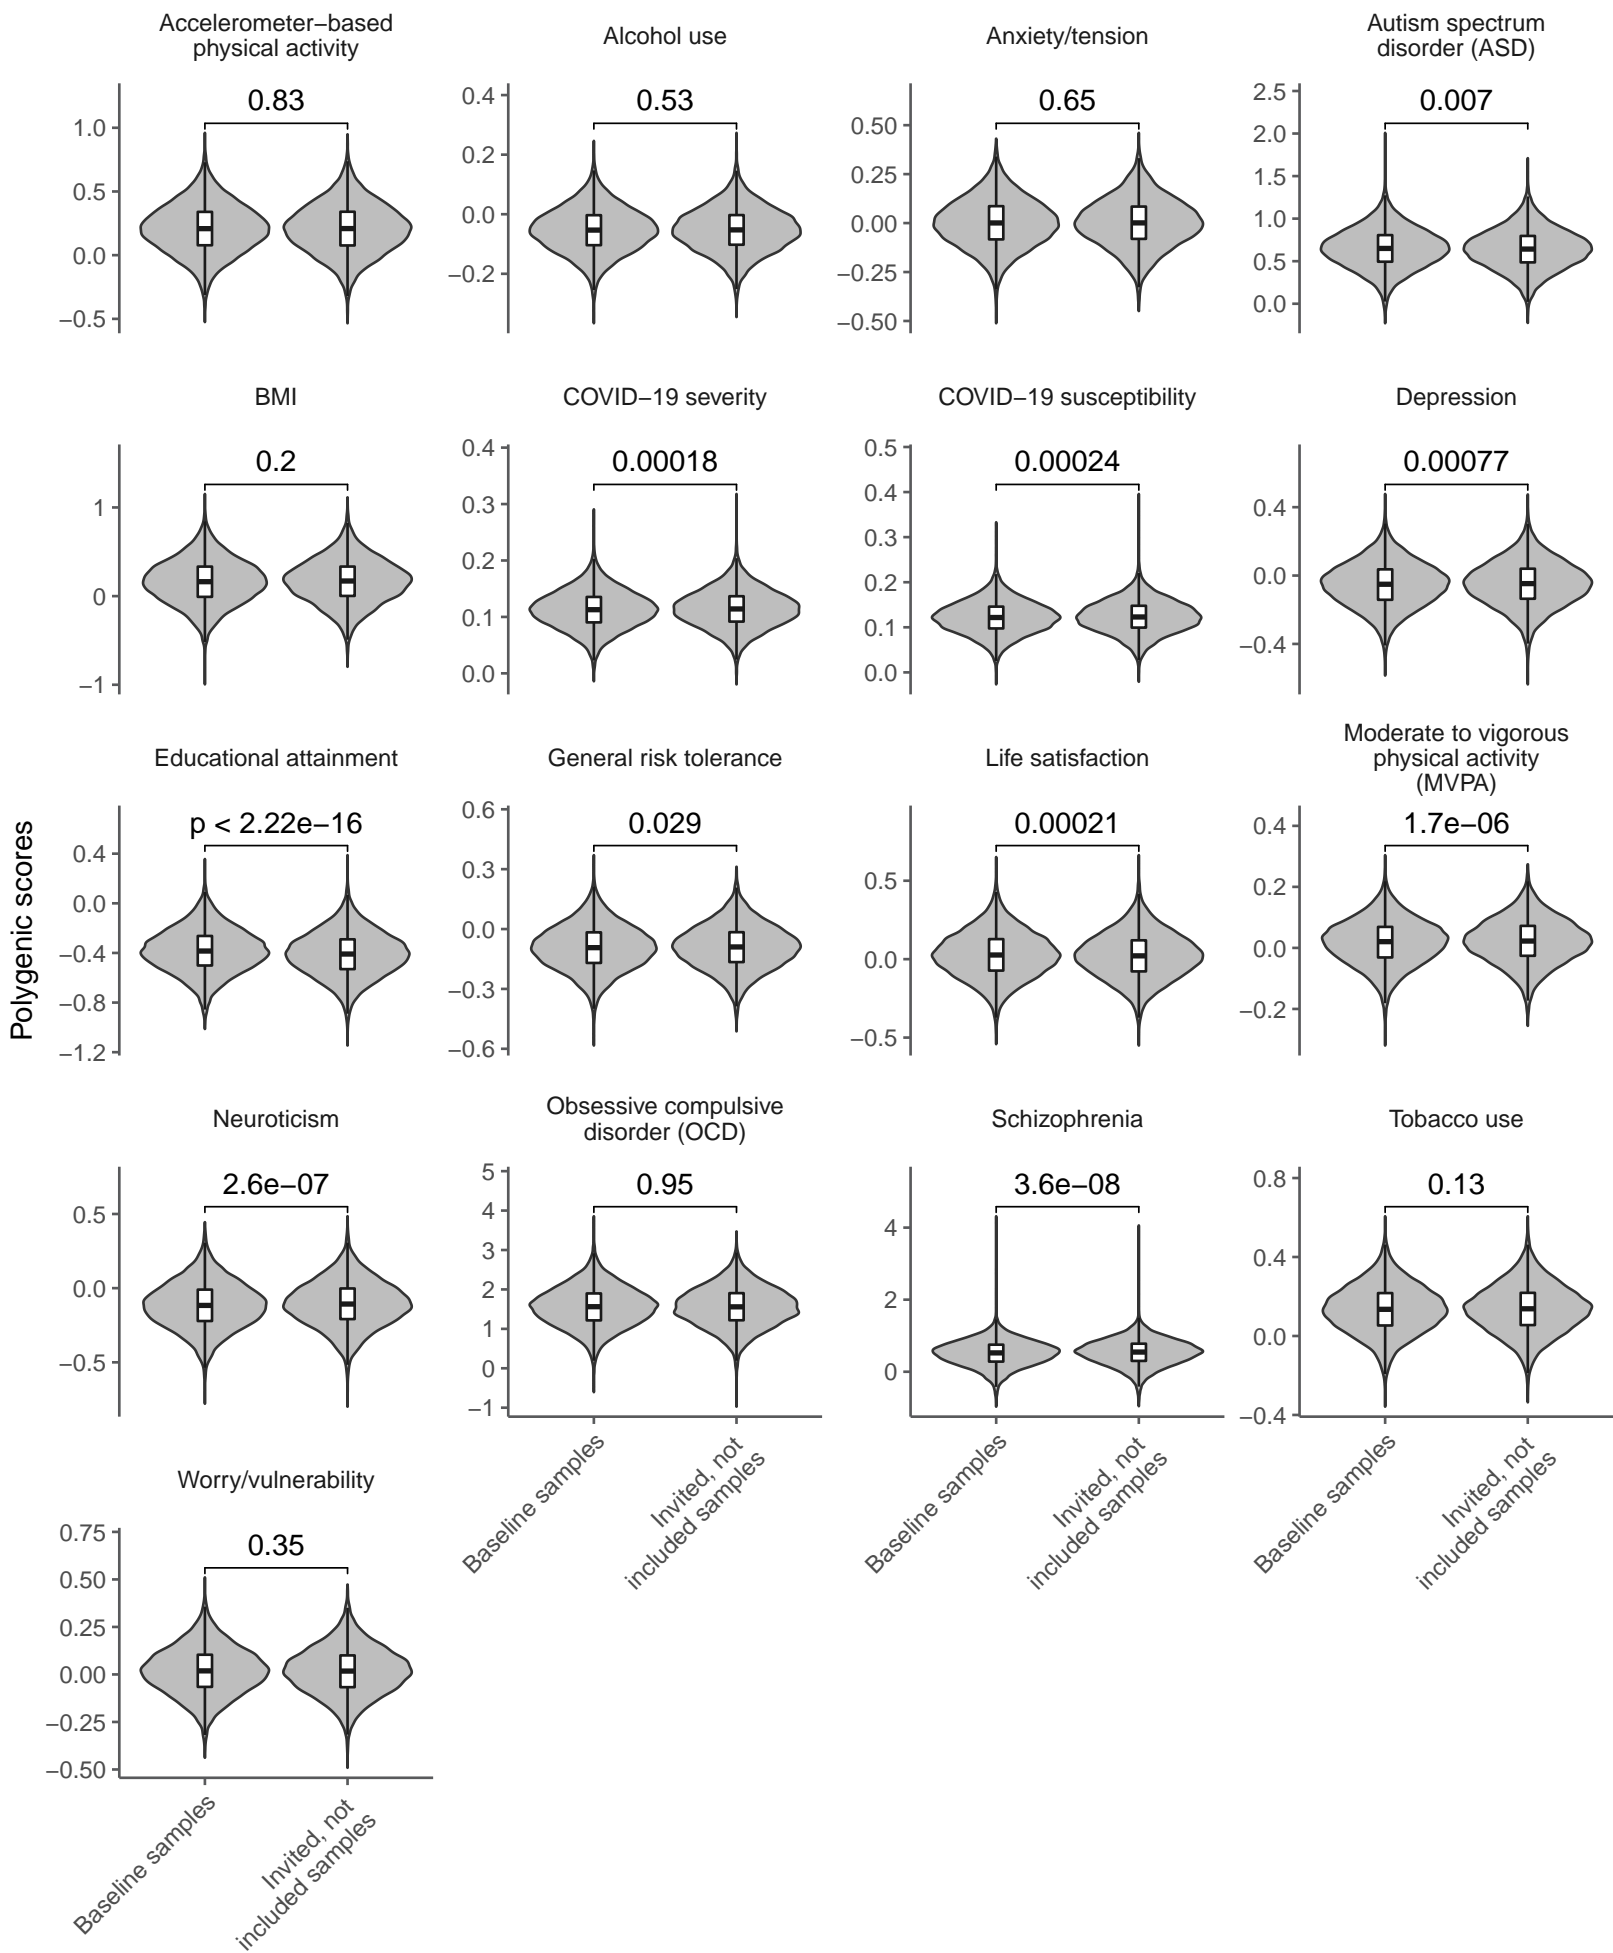

Included baseline samples compared to samples that have been invited but were not included

## B: Baseline samples vs not included samples (HumanCytoSNP)

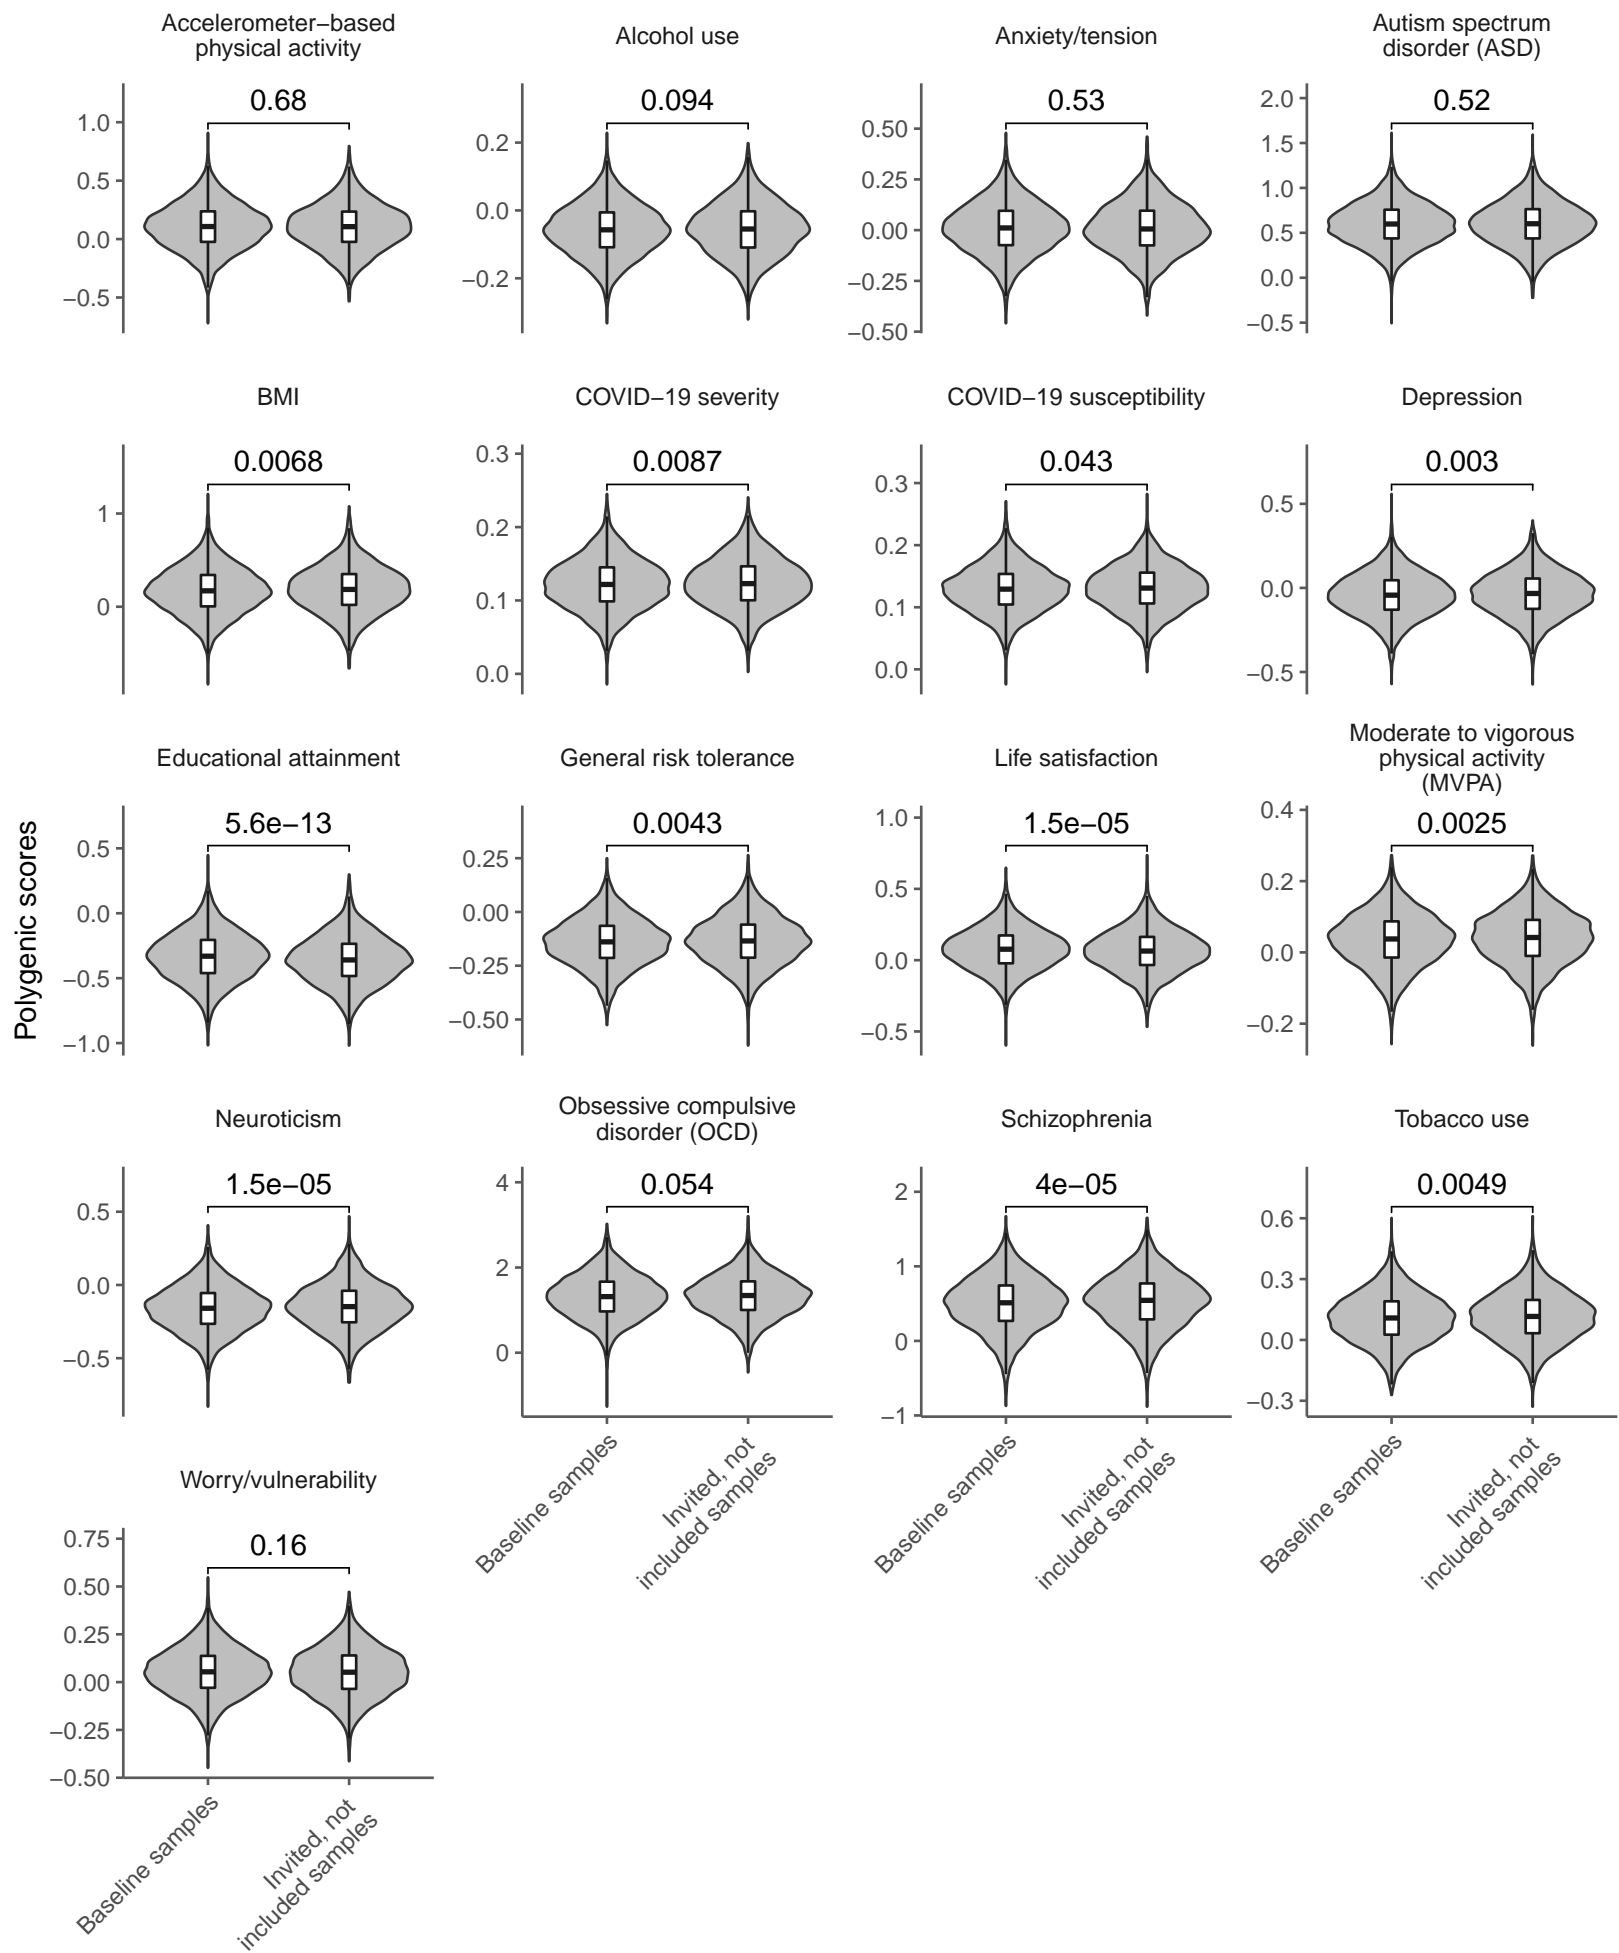

Included baseline samples compared to samples that have been invited but were not included

# C: Longitudinal samples vs not included samples (GSA)

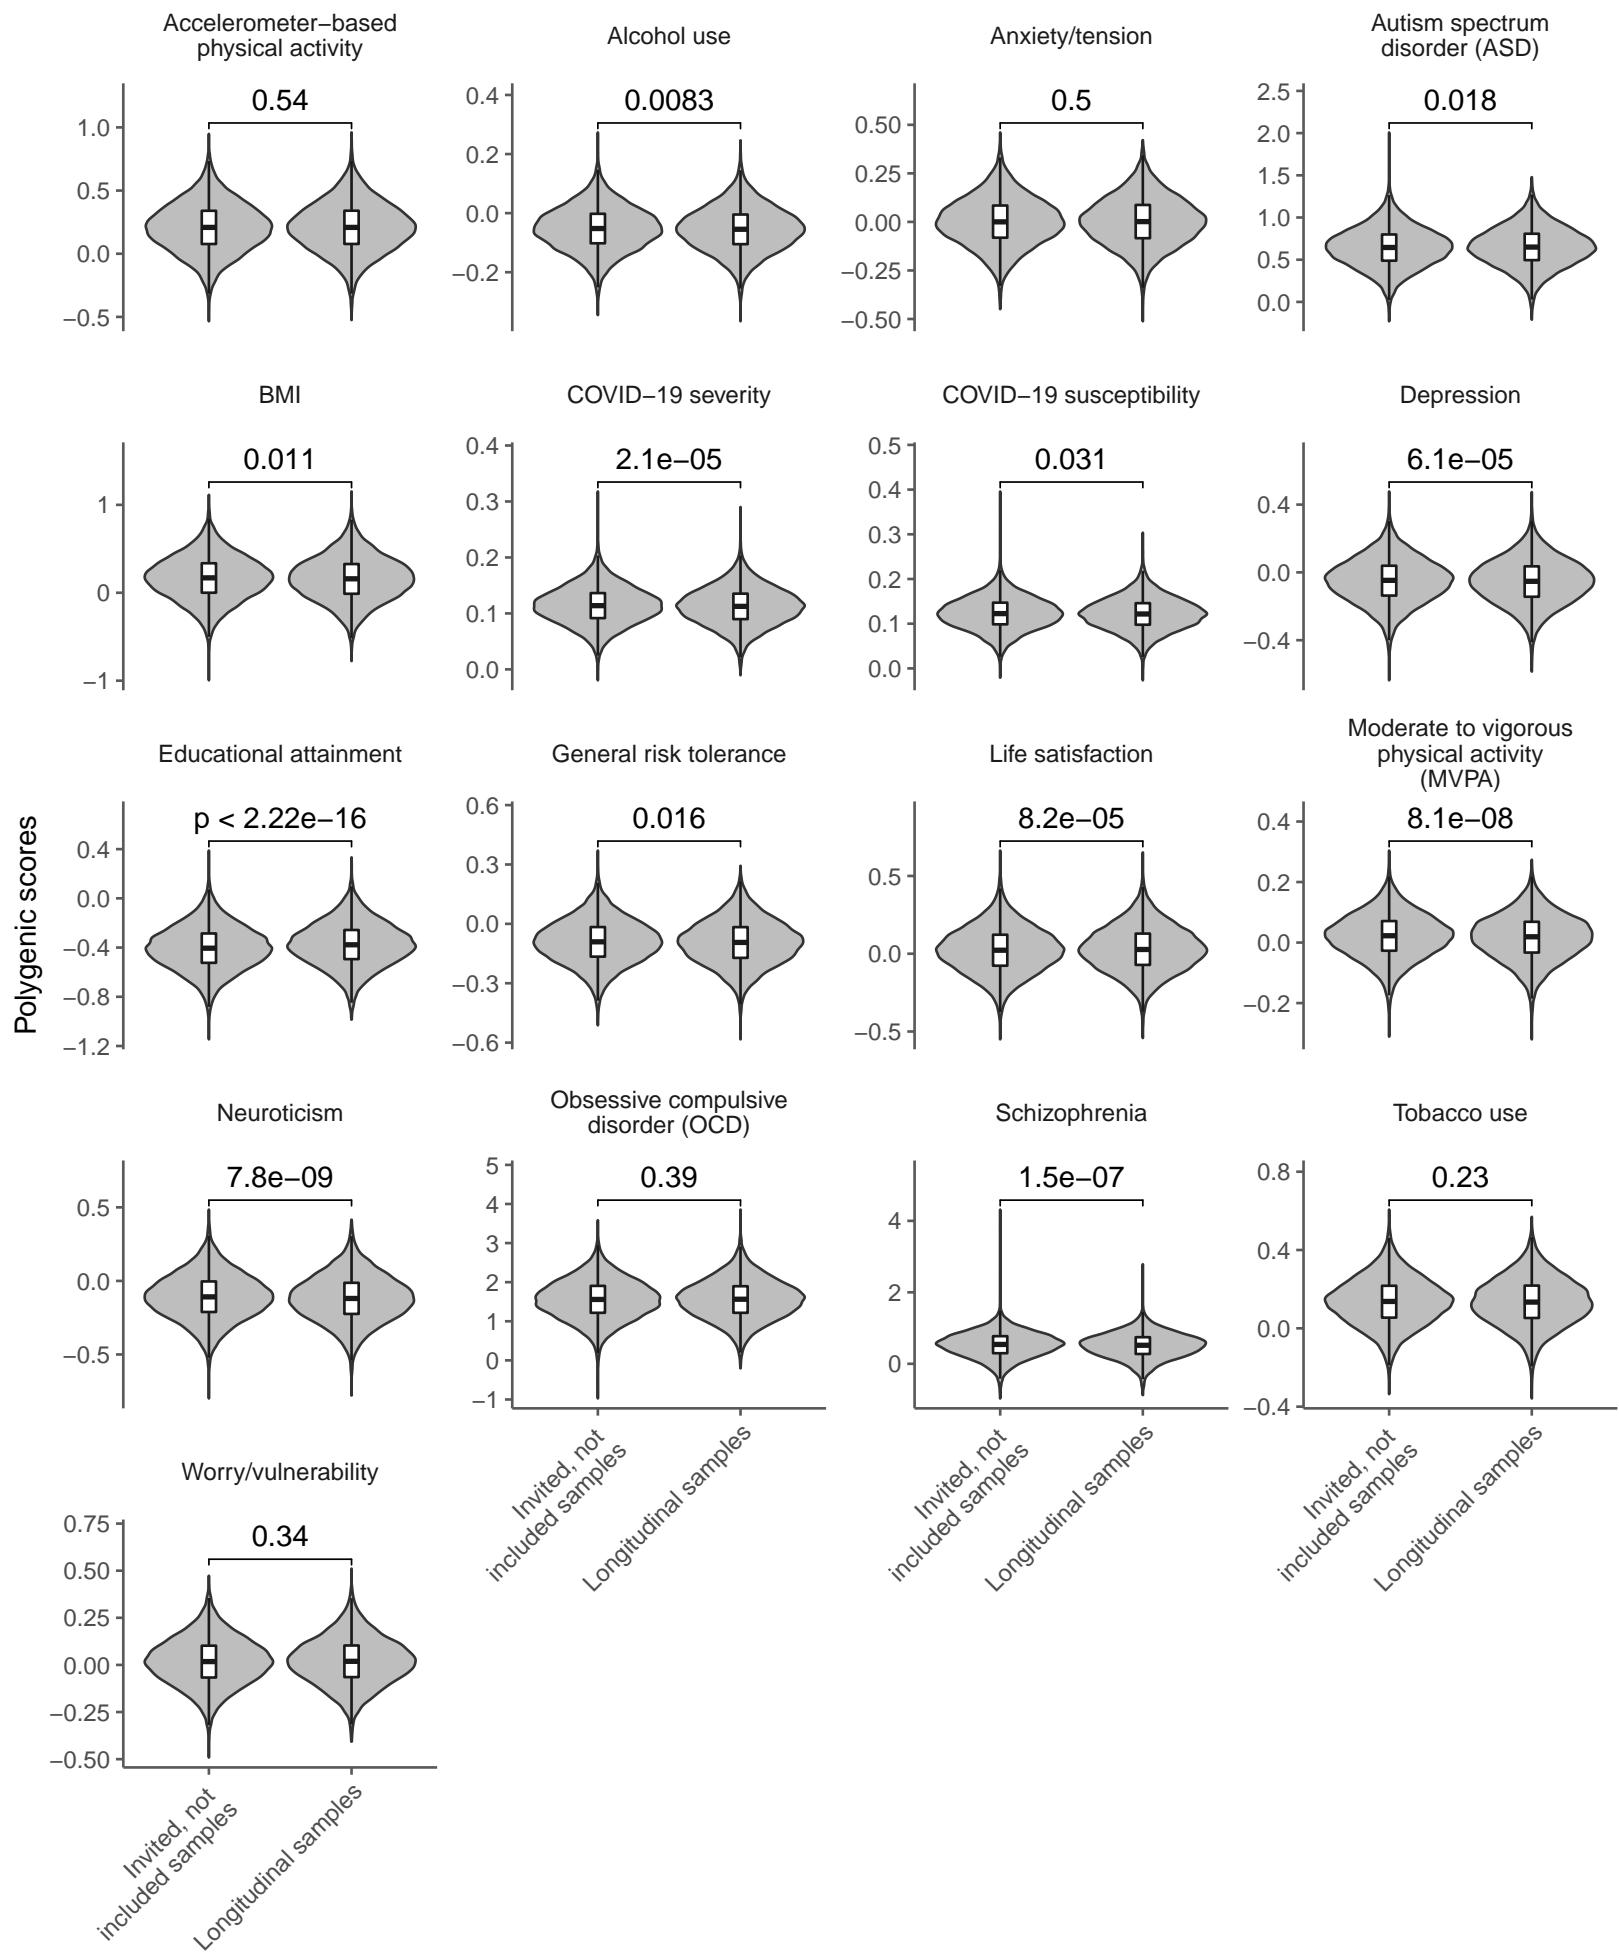

Included longitudinal samples compared to samples that have been invited but were not included in the longitudinal analysis

# D: Longitudinal samples vs not included samples (HumanCytoSNP)

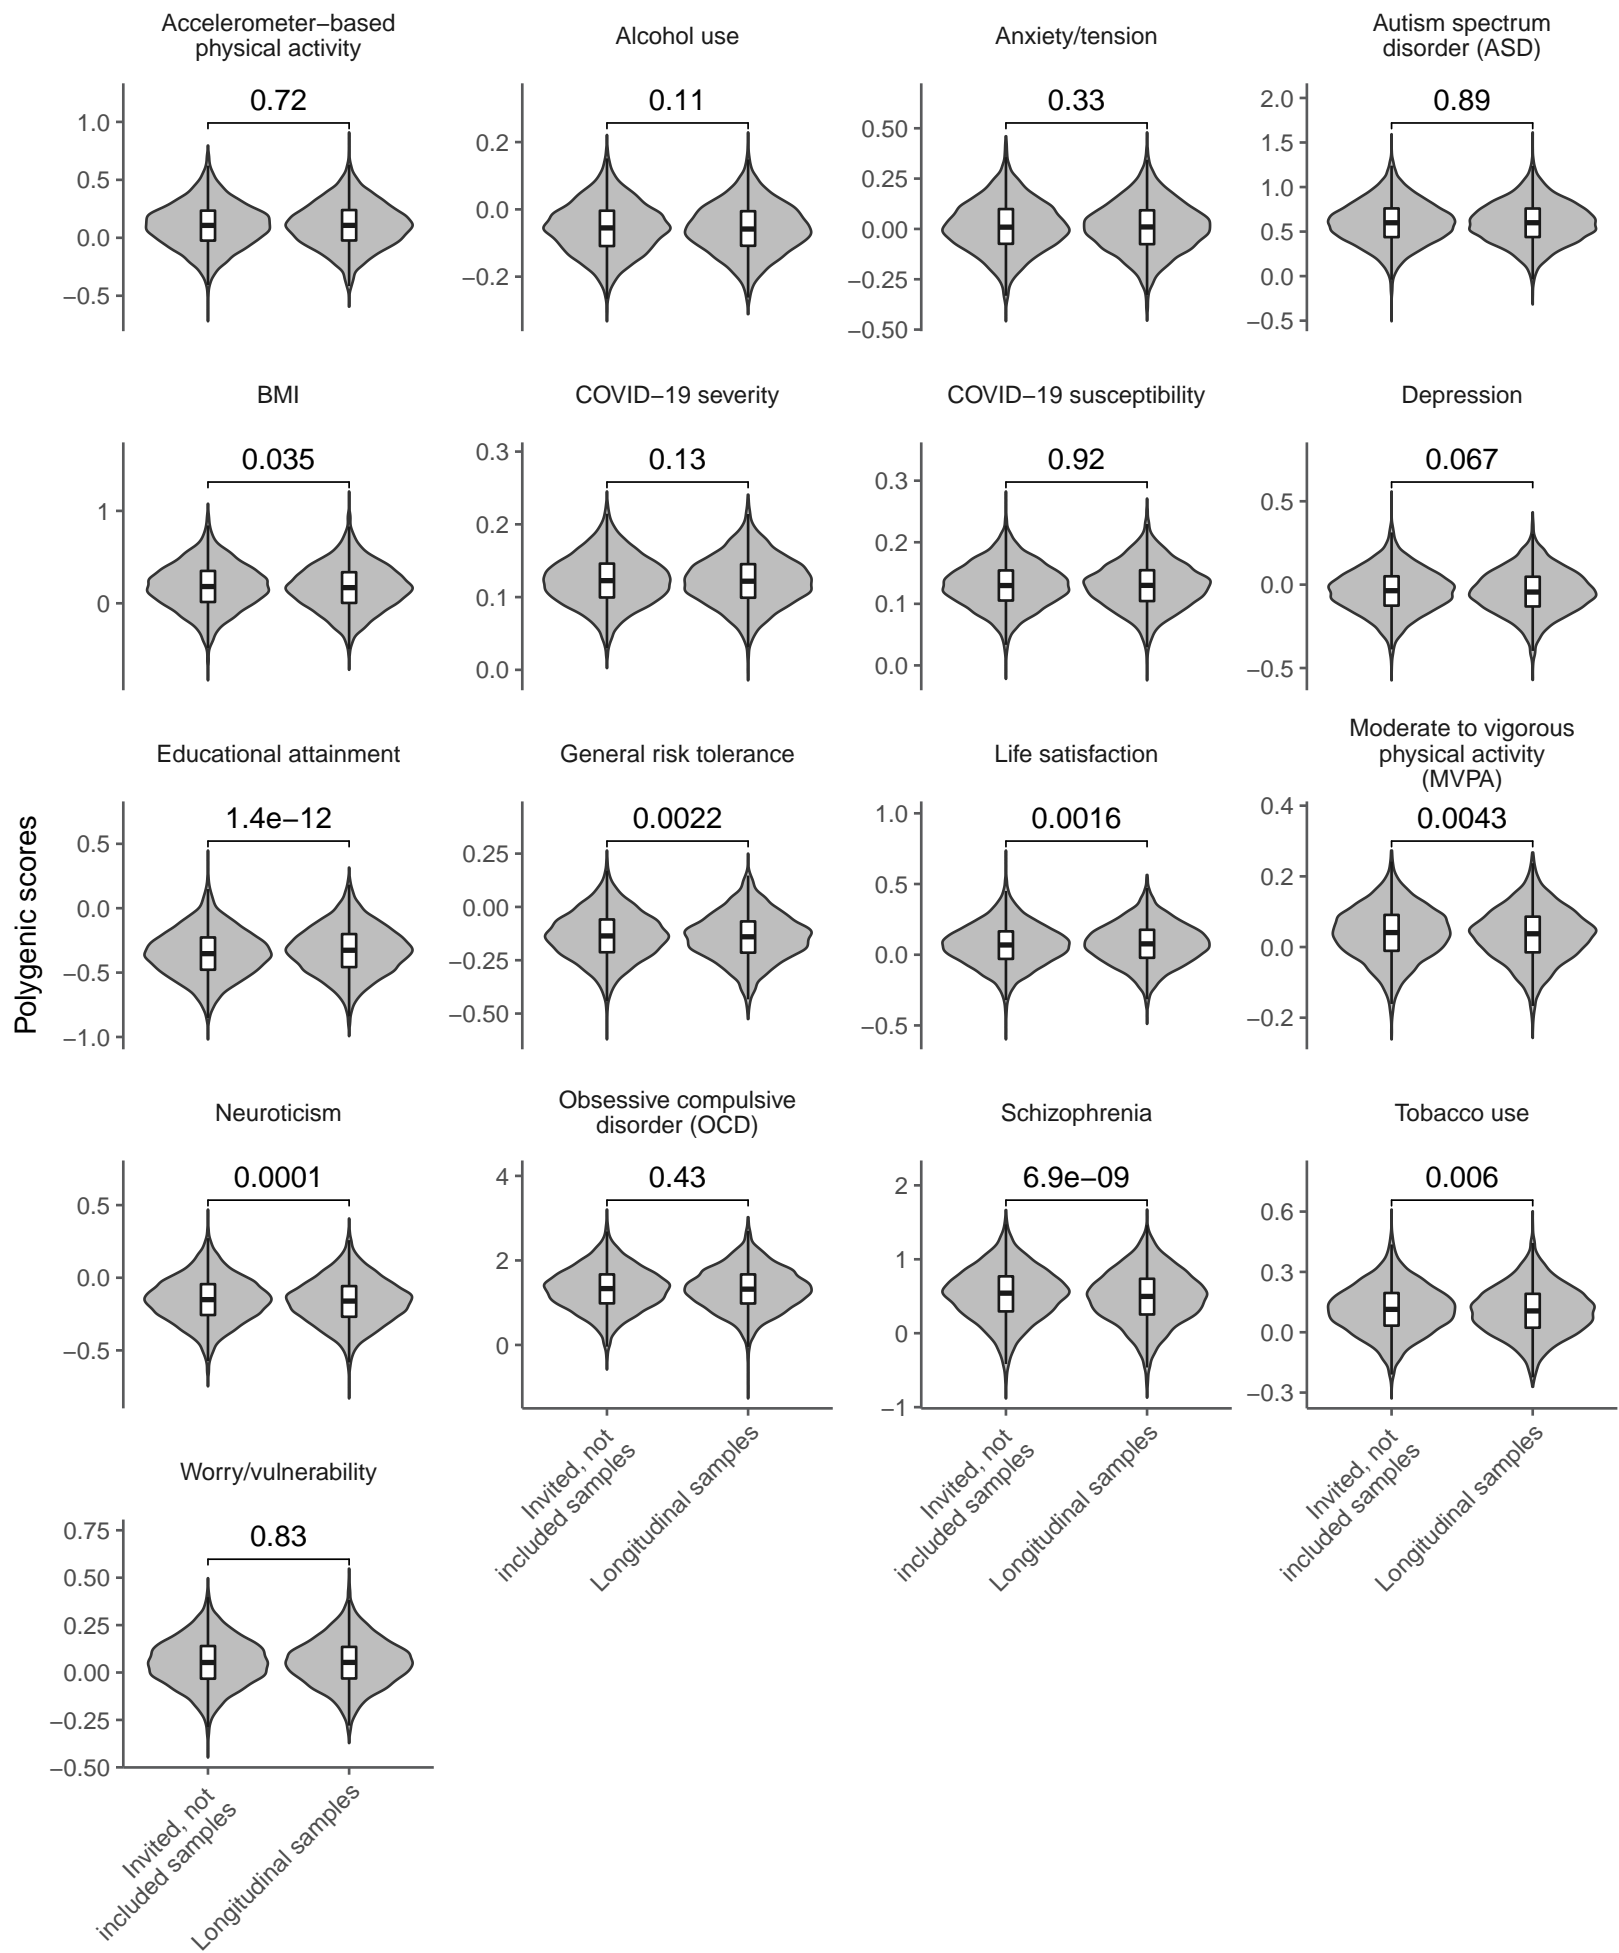

Included longitudinal samples compared to samples that have been invited but were not included in the longitudinal analysis

# E: Longitudinal samples vs baseline samples (GSA)

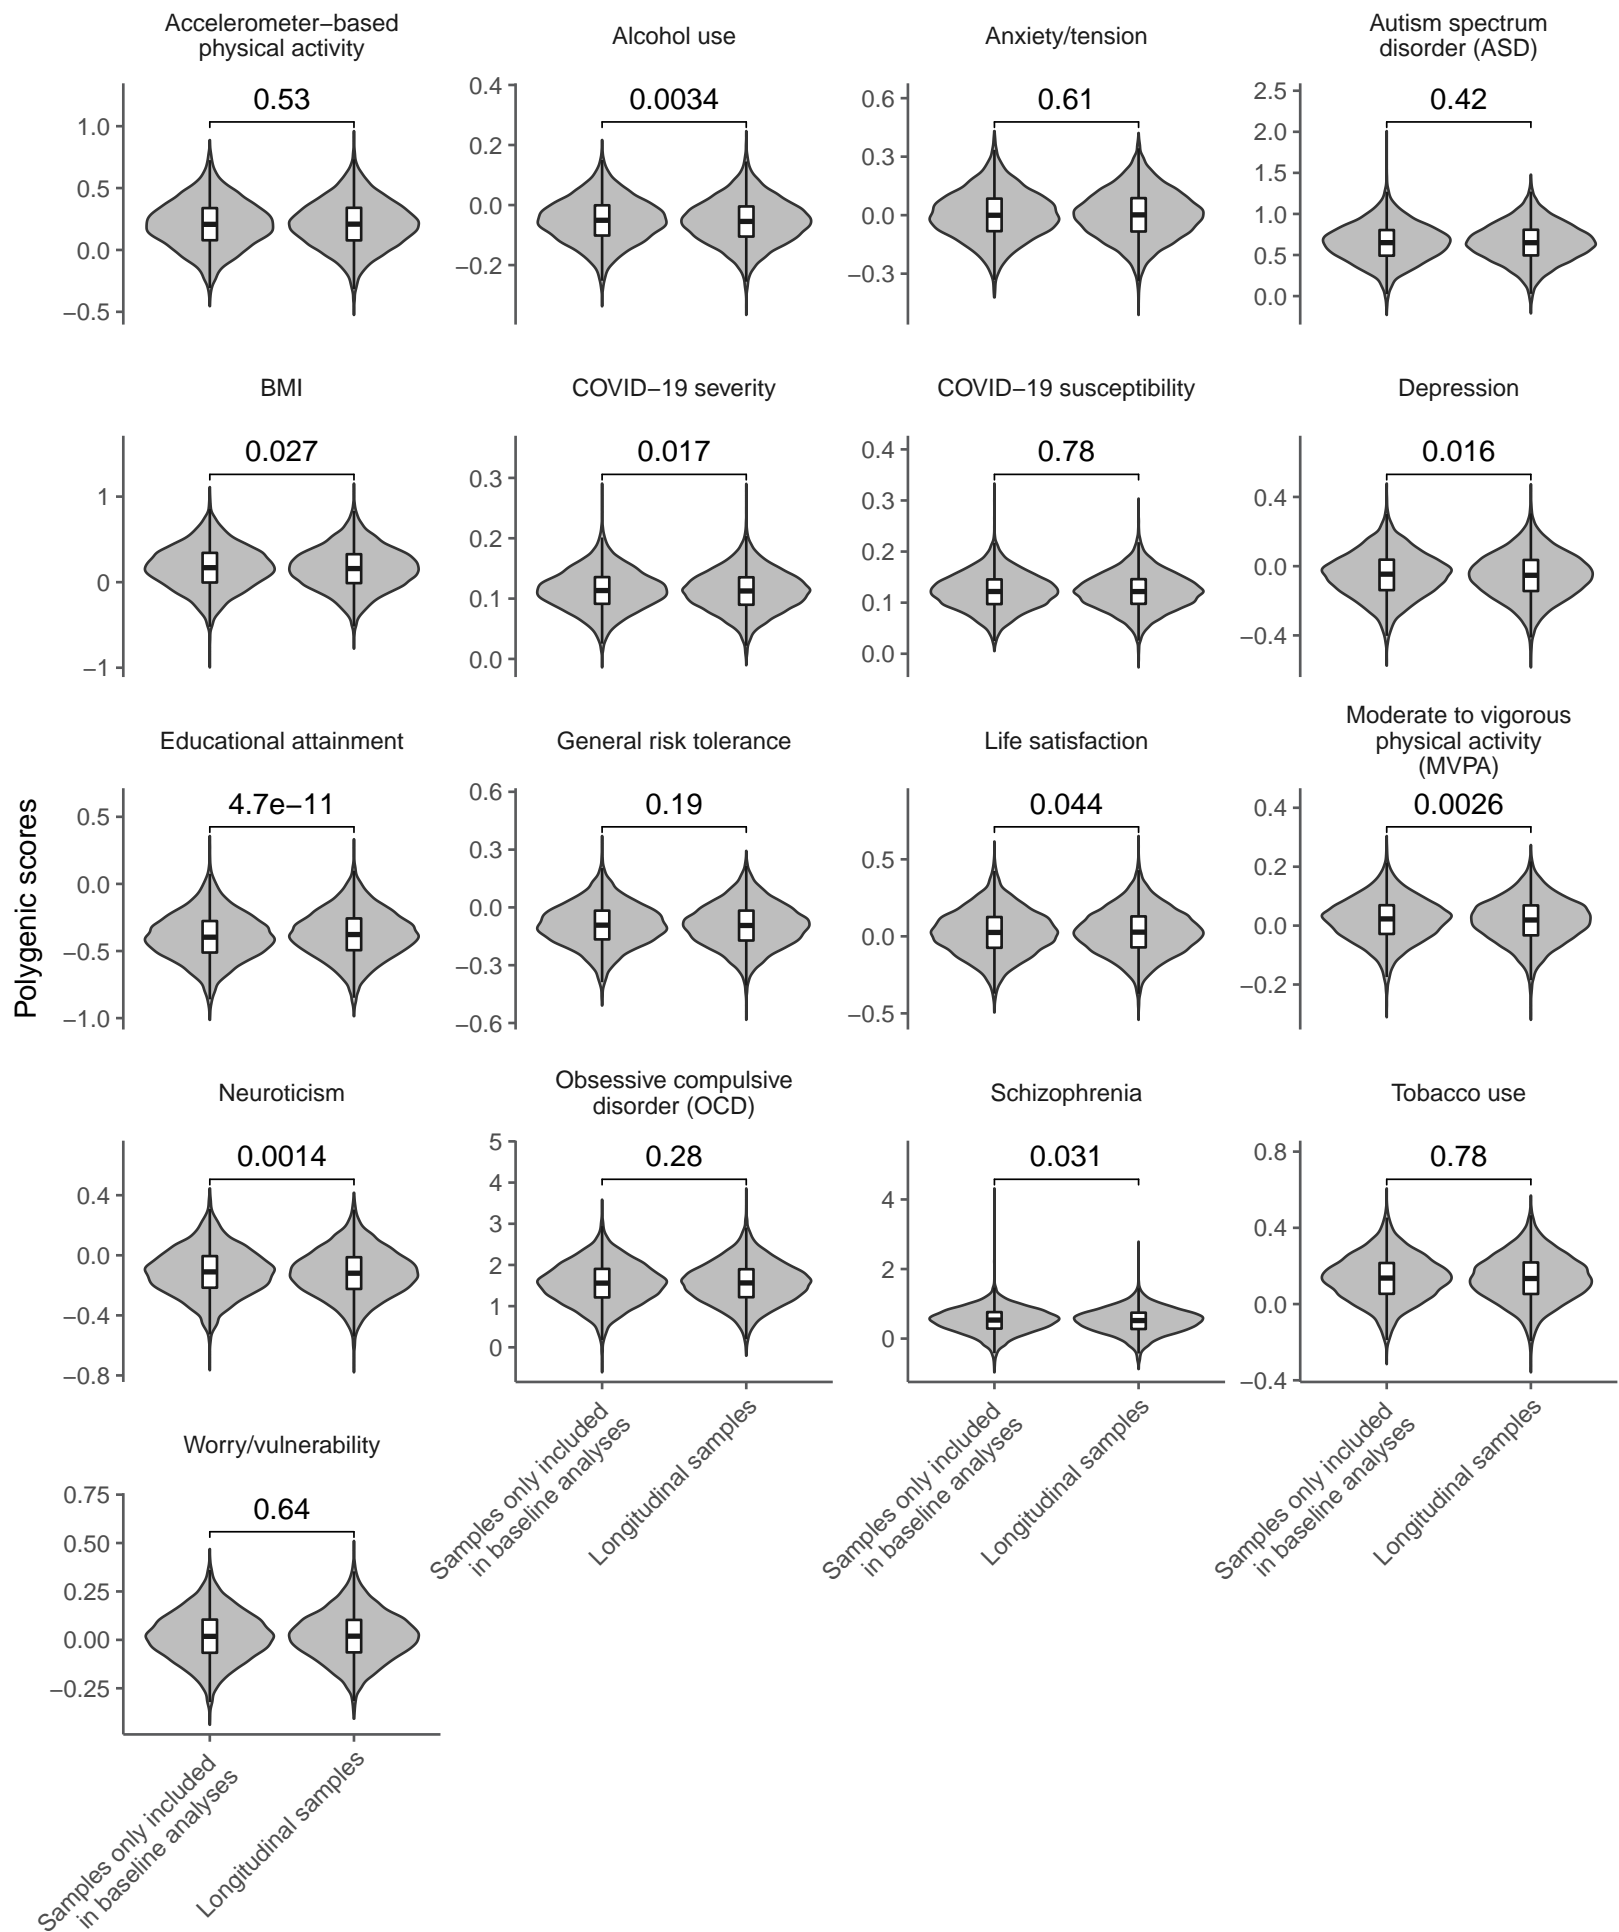

Included longitudinal samples compared to samples that have only been included in baseline analyses

# F: Longitudinal samples vs baseline samples (HumanCytoSNP)

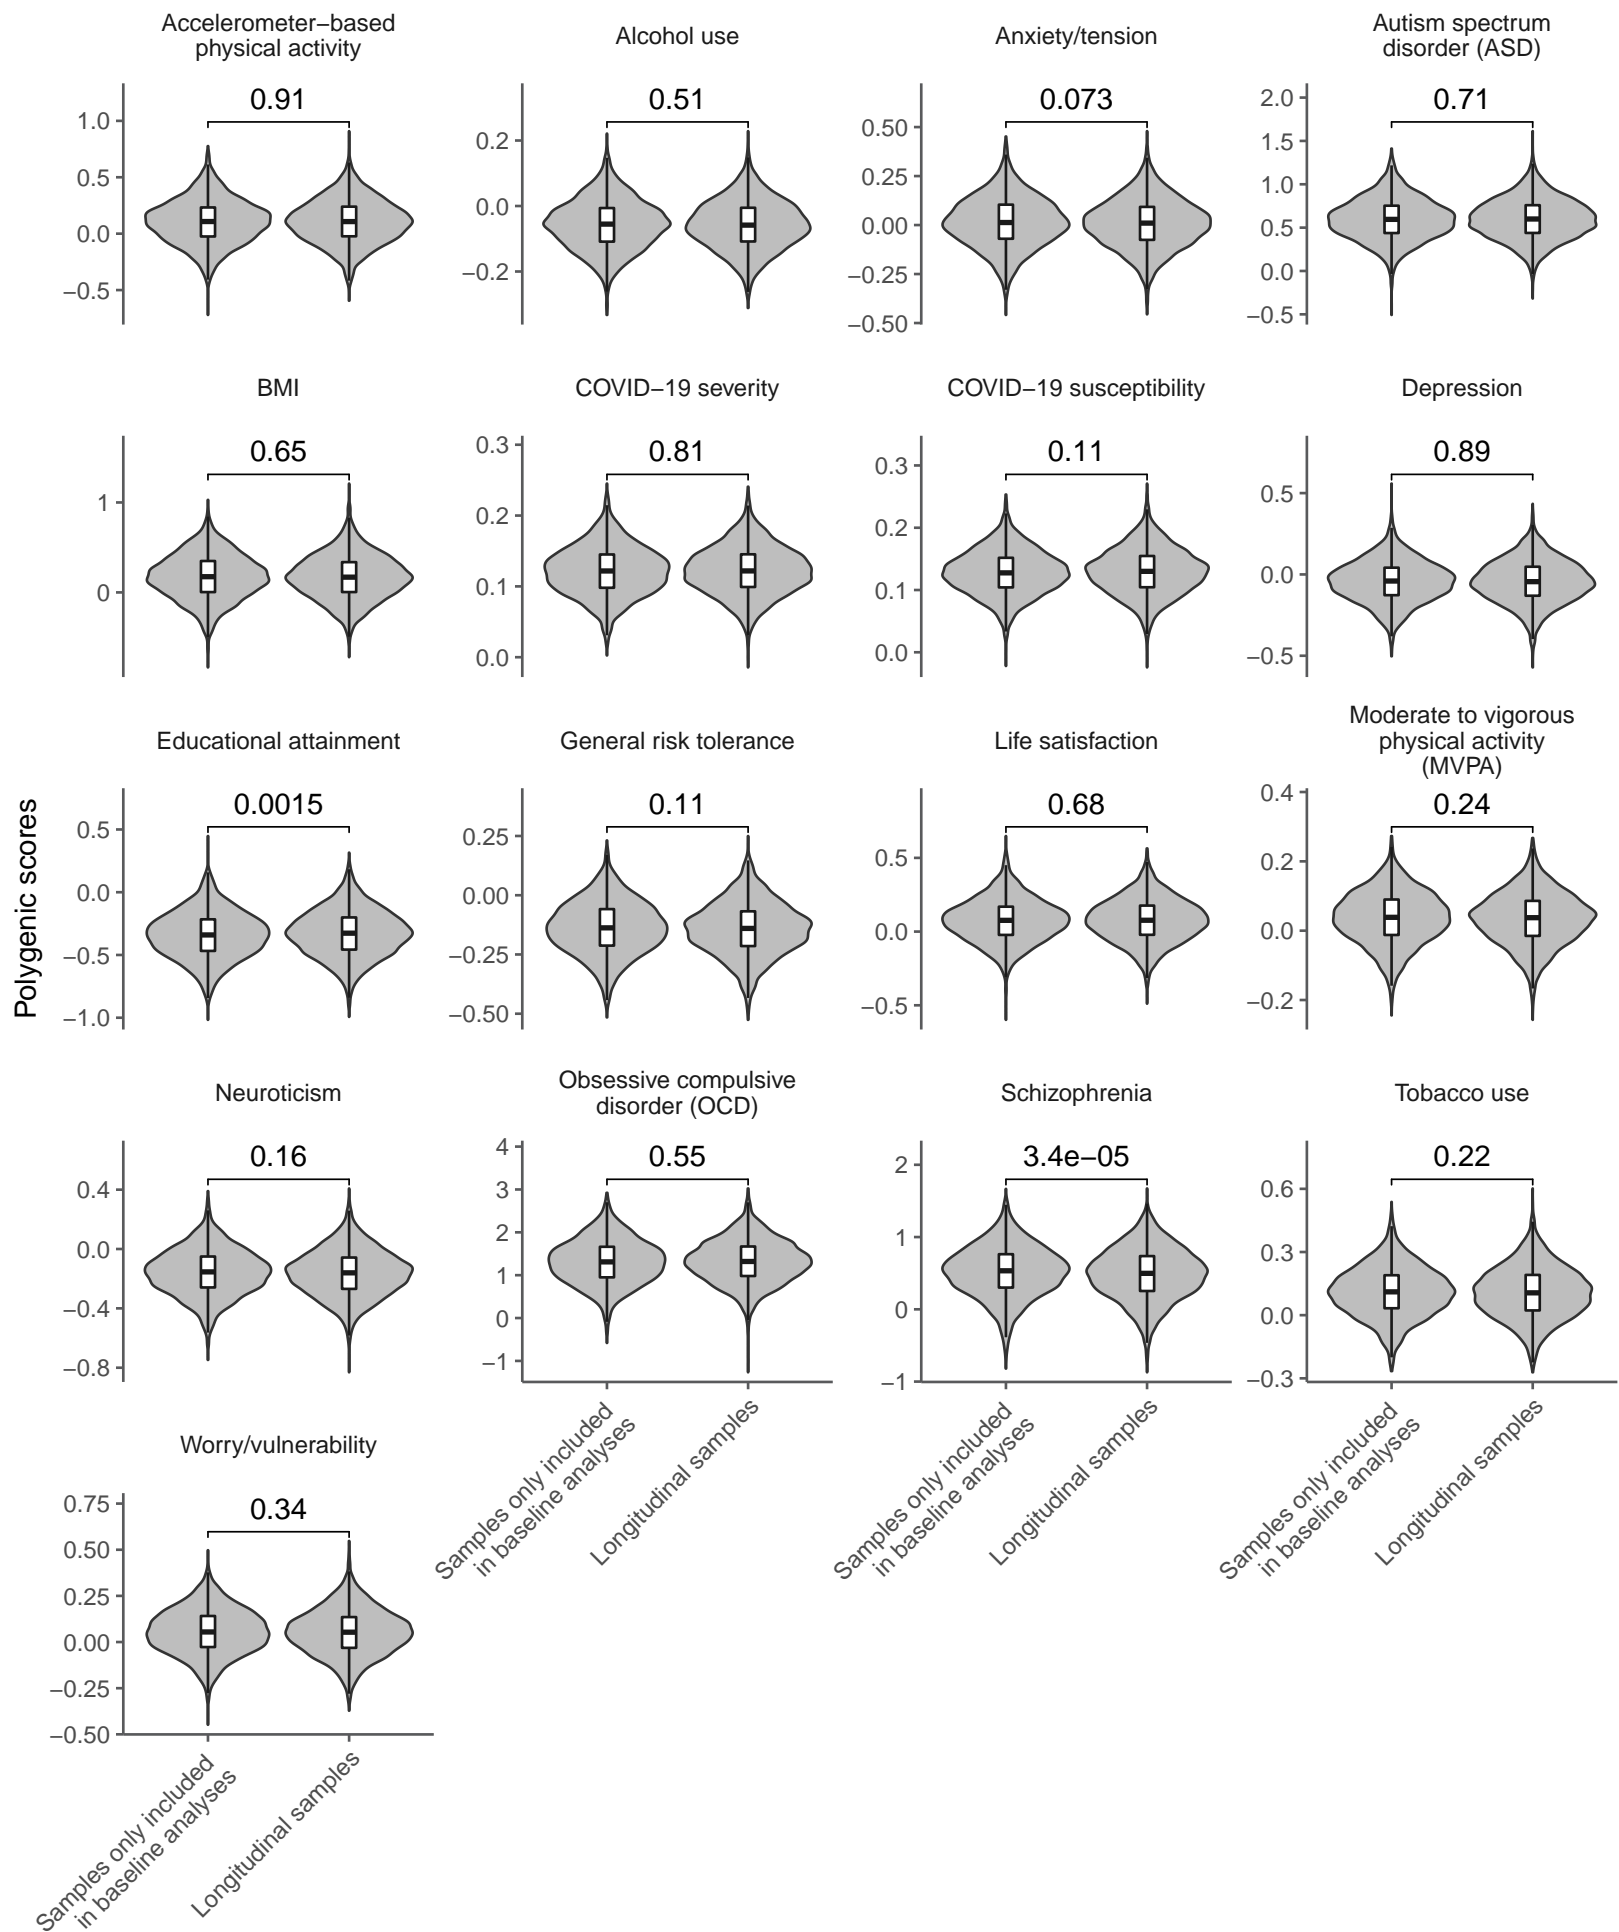

Included longitudinal samples compared to samples that have only been included in baseline analyses
